# Supplementary material for: Microsatellite expansions hidden within the human dark genome are translated in novel and toxic proteins causing muscle and neurodegenerative diseases
Source: Research Square preprint supplement (doi:10.21203/rs.3.rs-6122917/v1), 2025-04-17
Supplement: Supplementary file 1 [file 094375e4f8561b0fffbfa146.xlsx]

## Sheet: Ratio ATG-polyG vs GFP
Significant	-LOG(P-value)	Difference log2	Ratio ATG/GFP	Protein FDR Confidence: Combined	Accession	Description	Gene Name	ANOVA Significant	Cluster	-Log ANOVA P value	ANOVA q-value	Sum PEP Score	Coverage [%]	# Peptides	# PSMs	# Unique Peptides	# AAs	MW [kDa]	calc. pI	Modifications	XIC S01rep1	XIC S01rep2	XIC S01rep3	XIC S02rep1	XIC S02rep2	XIC S02rep3	XIC S03rep1	XIC S03rep2	XIC S03rep3	XIC S04rep1	XIC S04rep2	XIC S04rep3	XIC S05rep1	XIC S05rep2	XIC S05rep3	XIC S06rep1	XIC S06rep2	XIC S06rep3	XIC S07rep1	XIC S07rep2	XIC S07rep3	XIC S08rep1	XIC S08rep2	XIC S08rep3
	0.965186	9.59099	771.215	High	Q13042	Cell division cycle protein 16 homolog OS=Homo sapiens OX=9606	CDC16	+	Cluster -803	2.27815	0.00228491	27.549	14	8	43	8	620	71.6	5.85		13.2273	27.6932	14.3137	28.2909	27.7887	27.9276	27.8413	27.2785	28.1787	27.4692	26.9473	27.4368	27.5136	27.5776	27.3216	28.081	27.5484	27.7815	28.2379	27.8922	27.9186	27.7474	27.5111	27.7967
+	5.97813	8.75077	430.768	High	MB0002	Proteine ATG GLY - GFP (echantillon 2)	ATG-GLY	+	Cluster -803	10.0681	0	307.052	57	25	11015	1	322	32.2	6.11	Acetyl [N-Term]	13.2543	13.801	13.6259	22.1602	22.3506	22.4225	14.2437	12.7988	11.7439	12.7225	12.5514	12.1901	14.4944	12.1729	12.9789	13.7664	13.5478	13.3096	12.6517	12.7978	13.4077	11.8597	12.7464	10.9748
+	4.30307	3.86441	14.5648	High	P10644	cAMP-dependent protein kinase type I-alpha regulatory subunit OS=Homo sapiens OX=9606	PRKAR1A	+	Cluster -803	12.6629	0	4.146	3	1	20	1	381	43	5.35		13.5145	13.5115	12.8886	17.1634	17.1891	17.1552	17.6825	16.8568	17.3656	16.4705	16.107	16.7808	16.7118	16.9864	16.881	16.2399	16.4212	16.4944	16.8899	17.0788	17.0058	17.1087	17.236	16.7118
+	4.23324	2.2037	4.60658	High	P63220	40S ribosomal protein S21 OS=Homo sapiens OX=9606	RPS21	+	Cluster -803	10.4825	0	15.593	40	3	110	3	83	9.1	8.5		16.846	16.4313	16.6584	18.8814	18.8778	18.7876	18.8511	18.118	18.6918	18.5055	17.4687	17.5136	18.8474	18.9849	18.9891	18.6607	18.546	18.5158	19.0383	18.9891	18.9711	18.9704	18.8619	18.3695
	0.79067	2.15715	4.46034	High	P38159	RNA-binding motif protein, X chromosome OS=Homo sapiens OX=9606	RBMX			NaN	NaN	4.494	6	2	12	2	391	42.3	10.05	Met-loss+Acetyl [N-Term]	16.2767	16.3702	12.5604	17.3421	17.0049	17.3317	17.5724	14.5779	16.6747	16.9784	16.8211	11.2809	17.0634	15.1601	15.6701	17.9217	17.9166	17.8546	17.0381	18.0497	17.4535	17.4115	17.3887	14.2246
+	1.57254	1.81536	3.51949	High	Q5SY68	Protein S100-A7-like 2 OS=Homo sapiens OX=9606	S100A7L2	+	Cluster -800	2.396	0.00177457	2.777	12	1	4	1	101	11.3	5.21		12.3864	14.1635	12.9595	14.869	14.9333	15.1532	13.4377	12.1275	13.5905	12.4237	12.8147	12.6658	12.7702	12.5796	11.3644	13.0726	12.3994	12.1123	13.8507	13.8131	13.5629	13.2454	11.4893	13.8464
+	1.6574	1.53609	2.90008	High	P16403	Histone H1.2 OS=Homo sapiens OX=9606	H1-2	+	Cluster -800	3.51079	0.000272401	24.284	19	4	338	1	213	21.4	10.93	Met-loss+Acetyl [N-Term]	14.8408	14.534	13.4624	15.9187	15.8196	15.7072	16.1109	14.9254	16.0861	14.8015	14.3215	14.6957	15.0935	15.3647	14.9542	15.7143	15.5407	15.8215	15.9934	15.9183	16.0281	15.3328	15.096	12.9629
	1.24063	1.47631	2.78236	High	P62854	40S ribosomal protein S26 OS=Homo sapiens OX=9606	RPS26	+	Cluster -803	5.73514	3.77358e-05	6.882	23	2	29	2	115	13	11		15.074	15.2938	15.965	15.9635	17.2139	17.5843	18.3449	16.5979	17.5832	17.7893	17.6351	17.8038	18.0115	18.2598	18.2893	18.267	18.3986	18.4811	18.8335	19.0016	18.9039	18.5041	18.7012	16.5676
	0.60578	1.43894	2.71122	High	Q9BVG4	Protein PBDC1 OS=Homo sapiens OX=9606	PBDC1	+	Cluster -803	1.82491	0.00641026	7.724	9	2	44	2	233	26	4.79		14.2835	12.7716	16.4155	15.6773	16.0242	16.0858	16.1889	15.1854	15.9605	15.8333	15.7744	15.7766	15.7729	15.9698	15.8745	15.8224	15.4051	15.8471	15.9759	15.7214	16.0335	15.9504	15.8805	15.5283
+	1.96282	1.39542	2.63066	High	P52597	Heterogeneous nuclear ribonucleoprotein F OS=Homo sapiens OX=9606	HNRNPF			NaN	NaN	6.967	6	2	28	1	415	45.6	5.58		13.5859	12.9029	13.2278	14.2232	14.625	15.0546	13.2836	14.7751	15.0432	12.0219	12.4797	12.8009	13.0186	12.6427	13.7958	11.1591	12.9418	13.307	13.3343	12.662	15.5611	12.4988	12.9471	14.7678
	1.36294	1.34686	2.54357	High	Q13155	Aminoacyl tRNA synthase complex-interacting multifunctional protein 2 OS=Homo sapiens OX=9606	AIMP2	+	Cluster -803	5.58047	3.7037e-05	4.638	8	1	26	1	320	35.3	8.22		14.1613	12.8131	13.3644	14.3151	15.1247	14.9395	15.5682	15.1387	15.5579	15.2462	15.3544	15.3526	15.1355	15.392	15.4408	14.0608	15.0136	15.244	15.2421	15.441	15.7094	15.4957	15.4622	15.2303
	1.2999	1.33883	2.52946	High	Q63ZY3	KN motif and ankyrin repeat domain-containing protein 2 OS=Homo sapiens OX=9606	KANK2	+	Cluster -803	5.10941	4.35967e-05	5.645	3	2	16	2	851	91.1	5.63		13.5367	14.9377	13.4672	15.3486	15.2052	15.4043	15.7401	14.5184	15.588	15.5327	14.8174	15.1267	15.3705	15.3451	15.2711	15.0766	15.1545	14.9638	15.4089	15.5292	15.2672	15.679	15.6039	15.0544
	1.22801	1.32567	2.50649	High	O60934	Nibrin OS=Homo sapiens OX=9606	NBN	+	Cluster -803	5.60132	3.71517e-05	4.082	4	2	11	2	754	84.9	6.9		13.8927	13.3838	12.401	14.8728	14.046	14.7357	15.5114	13.3465	14.9558	15.4346	15.3099	15.2329	15.4262	15.5447	15.6664	15.0916	14.9043	15.1806	15.6346	15.6196	15.7317	15.8619	15.9363	14.8247
	0.813733	1.29294	2.45027	High	P08123	Collagen alpha-2(I) chain OS=Homo sapiens OX=9606	COL1A2	+	Cluster -803	2.27672	0.00228732	3.171	1	1	5	1	1366	129.2	8.95		12.7939	13.0114	12.5903	12.6411	14.8384	14.7949	14.672	14.3787	14.2764	14.1924	13.6067	13.6272	14.6889	14.8575	14.8133	15.4495	14.115	12.7101	14.7033	13.9522	14.8091	15.1719	14.7553	14.6214
	1.07214	1.28855	2.44282	High	Q14203	Dynactin subunit 1 OS=Homo sapiens OX=9606	DCTN1	+	Cluster -800	1.68764	0.008995	6.171	2	2	4	2	1278	141.6	5.81		13.4124	13.5631	12.6554	13.9525	14.0672	15.4769	14.8045	13.8511	14.1844	12.2371	13.9759	11.7483	15.0745	14.7008	14.698	14.6583	14.4726	12.3701	15.3699	15.4125	15.1752	12.5636	15.1229	12.3975
	0.799424	1.28156	2.43102	High	O75367	Core histone macro-H2A.1 OS=Homo sapiens OX=9606	MACROH2A1	+	Cluster -800	4.30536	7.01754e-05	9.9	11	3	13	3	369	39.2	9.83		13.234	13.7528	12.4018	13.1987	14.735	15.2995	15.5375	14.6842	15.154	13.6782	13.3662	13.8149	14.4046	14.425	14.7229	15.0348	14.897	14.9751	14.3848	14.8563	14.843	15.1331	14.8965	14.7507
+	4.2824	1.24155	2.36452	High	P25787	Proteasome subunit alpha type-2 OS=Homo sapiens OX=9606	PSMA2	+	Cluster -803	5.08573	5.42005e-05	4.266	11	2	12	2	234	25.9	7.43		16.9664	16.7539	16.7813	18.0745	18.096	18.0558	18.3491	16.7724	17.9444	17.8604	17.6888	17.7694	17.4644	17.5054	17.4964	17.6896	17.4719	17.4668	14.8867	16.4499	16.5457	16.7402	16.7648	15.53
+	1.56705	1.22283	2.33404	High	P48594	Serpin B4 OS=Homo sapiens OX=9606	SERPINB4	+	Cluster -801	4.66521	4.80769e-05	109.098	42	18	447	6	390	44.8	6.21	Acetyl [N-Term]	17.2174	15.9958	16.6494	17.7929	17.7651	17.9731	14.1867	13.5512	17.5027	13.3705	13.0957	12.9144	12.7187	14.765	15.169	13.144	13.7805	11.946	11.4522	11.8291	11.9979	12.9287	13.0156	14.1737
	0.736869	1.21459	2.32075	High	P62140	Serine/threonine-protein phosphatase PP1-beta catalytic subunit OS=Homo sapiens OX=9606	PPP1CB	+	Cluster -803	2.33687	0.00202286	12.524	10	3	100	1	327	37.2	6.19		12.7844	15.1777	14.8818	15.4487	15.4236	15.6154	15.5962	14.5424	15.2991	15.2315	14.5427	14.8759	15.4422	15.4881	15.4297	14.9313	15.0761	15.2111	15.2087	15.5328	15.3478	15.0559	15.1102	14.9883
+	2.45637	1.12535	2.18155	High	P01889	HLA class I histocompatibility antigen, B alpha chain OS=Homo sapiens OX=9606	HLA-B	+	Cluster -803	4.58155	6.57277e-05	12.984	12	3	190	1	362	40.4	5.85		13.403	13.4824	13.01	14.206	14.5435	14.5219	14.2534	12.2084	13.8165	14.346	14.2002	14.2163	14.2894	14.2372	14.2813	14.0678	14.3437	14.26	14.8548	14.7177	14.6149	14.3502	14.0724	12.8857
	0.909591	1.09861	2.14148	High	P06730	Eukaryotic translation initiation factor 4E OS=Homo sapiens OX=9606	EIF4E	+	Cluster -803	3.74279	0.000166352	2.867	5	1	15	1	217	25.1	6.15		13.2804	14.0627	12.1248	14.3163	14.211	14.2365	14.7834	13.7369	14.5188	14.1853	14.1633	13.8137	14.4252	13.9726	14.2787	13.8756	13.9934	14.0809	14.4277	14.3384	14.3361	14.1004	13.9733	13.8116
	0.384046	1.09566	2.13711	High	P62891	60S ribosomal protein L39 OS=Homo sapiens OX=9606	RPL39			NaN	NaN	3.356	20	1	19	1	51	6.4	12.56		13.7041	13.699	17.2966	15.8847	15.9783	16.1238	16.5169	15.1159	16.2226	15.5297	14.9701	15.1922	15.5047	15.803	15.7801	16.0083	16.1711	16.2204	16.8167	16.6066	16.6469	15.3967	15.3877	14.7223
	1.40739	1.04246	2.05973	High	Q92817	Envoplakin OS=Homo sapiens OX=9606	EVPL	+	Cluster -800	1.68919	0.00897243	96.373	18	28	135	28	2033	231.5	6.96		15.3314	15.4134	15.3562	15.7948	16.4482	16.9854	16.7182	15.08	15.3712	16.2094	14.5815	15.035	15.9421	15.5811	16.1525	16.2033	15.9952	15.2397	16.0519	15.2577	15.5937	15.6776	15.7912	15.4822
	0.44873	1.038	2.05338	High	P40261	Nicotinamide N-methyltransferase OS=Homo sapiens OX=9606	NNMT	+	Cluster -803	2.09925	0.00334783	4.252	4	1	45	1	264	29.6	5.74		12.5526	15.3977	15.6607	15.599	15.583	15.5429	15.8202	15.8483	15.9211	15.8559	15.1669	15.2075	15.8119	16.0391	15.9417	15.95	15.9313	15.9438	16.1942	16.2593	16.2793	16.2182	16.2249	15.9893
	0.643147	0.970604	1.95966	High	P28799	Progranulin OS=Homo sapiens OX=9606	GRN	+	Cluster -803	2.0514	0.00375335	5.218	7	2	12	2	593	63.5	6.83		13.2399	12.714	14.9466	14.4557	14.7968	14.5599	14.7442	14.1537	14.0085	14.1848	13.905	14.1116	14.5482	14.4554	14.5027	14.208	14.1699	14.4805	14.4738	14.5335	14.4571	13.8044	14.0351	13.4357
	0.70001	0.959231	1.94427	High	Q9BRL6	Serine/arginine-rich splicing factor 8 OS=Homo sapiens OX=9606	SRSF8	+	Cluster -803	2.42608	0.00167591	2.698	3	1	7	1	282	32.3	11.72		12.6107	14.6526	13.1332	14.1848	14.4922	14.5973	14.5239	13.2684	14.1022	14.3505	13.7124	13.8268	14.0156	14.2609	14.256	14.2363	14.1862	14.2415	14.1529	14.0795	14.3215	14.0989	13.987	13.7609
	0.528251	0.923588	1.89683	High	P48643	T-complex protein 1 subunit epsilon OS=Homo sapiens OX=9606	CCT5	+	Cluster -803	2.87367	0.000675159	6.17	4	2	42	2	541	59.6	5.66		14.8148	13.3068	15.9646	15.6149	15.6095	15.6326	15.0138	14.9588	15.0086	15.9765	16.1131	16.0438	15.9842	16.331	16.1871	16.1572	16.0426	16.2012	15.9685	16.0291	15.9367	16.3778	16.2616	15.1458
	0.806204	0.91542	1.88612	High	Q9UHB9	Signal recognition particle subunit SRP68 OS=Homo sapiens OX=9606	SRP68			NaN	NaN	2.749	2	1	5	1	627	70.7	8.56		14.7724	13.7341	12.9905	14.8624	14.5624	14.8184	14.7275	14.0275	14.887	14.7304	14.2451	14.8107	14.6084	14.8126	14.7932	12.0953	14.8557	14.3718	14.9746	14.9248	14.9905	14.7311	14.5613	14.1984
+	1.69484	0.902222	1.86894	High	Q15717	ELAV-like protein 1 OS=Homo sapiens OX=9606	ELAVL1	+	Cluster -800	4.12218	0.000106557	5.974	7	2	36	2	326	36.1	9.17		14.531	14.9233	14.0921	15.4187	15.3718	15.4626	15.7994	13.431	15.4806	14.9954	14.4522	14.5939	15.1403	15.191	15.1557	16.0403	15.9309	15.9949	15.4847	15.4311	15.4253	15.4646	15.4331	14.8921
	0.93961	0.864341	1.82051	High	P80188	Neutrophil gelatinase-associated lipocalin OS=Homo sapiens OX=9606	LCN2			NaN	NaN	6.279	10	2	35	2	198	22.6	8.91		14.725	13.5741	13.3309	14.7498	14.7106	14.7626	15.7258	11.6057	13.298	12.2148	12.7263	13.2537	11.5231	15.6663	14.7443	14.0596	14.0805	15.6626	16.5206	16.2065	16.3103	14.6208	15.1764	12.3662
	0.870778	0.846812	1.79852	High	Q04206	Transcription factor p65 OS=Homo sapiens OX=9606	RELA	+	Cluster -803	3.60657	0.000210526	7.862	6	3	34	3	551	60.2	5.68		16.1821	15.0991	14.6623	16.1943	16.1078	16.1819	16.3784	15.5029	16.1443	16.0256	16.0309	16.037	15.9122	16.045	15.7563	15.6188	15.049	14.8558	15.9477	16.0538	15.9674	15.9551	16.1259	15.6878
	0.309251	0.820099	1.76553	High	P53007	Tricarboxylate transport protein, mitochondrial OS=Homo sapiens OX=9606	SLC25A1			NaN	NaN	6.445	7	2	62	2	311	34	9.89		14.2075	16.1463	16.3563	15.6388	15.4678	18.0636	15.5083	15.765	15.6687	15.4041	14.9881	17.1362	15.8209	15.8713	15.7113	14.8709	15.0111	14.7861	16.139	16.0721	16.0208	16.0546	17.7253	16.4177
+	1.58421	0.79732	1.73787	High	Q9H078	Caseinolytic peptidase B protein homolog OS=Homo sapiens OX=9606	CLPB	+	Cluster -803	4.90077	5.11509e-05	8.705	6	4	17	4	707	78.7	9.01		15.27	15.0738	14.8057	15.9826	16.083	15.4759	16.2516	14.3617	15.5229	15.2447	15.0022	15.0822	16.3602	16.5061	16.4651	15.2946	15.1057	15.3545	15.616	15.8311	15.3357	15.712	15.6767	15.2704
	0.717339	0.793632	1.73343	High	Q9UQ35	Serine/arginine repetitive matrix protein 2 OS=Homo sapiens OX=9606	SRRM2	+	Cluster -800	5.11135	4.37158e-05	3.957	1	2	5	2	2752	299.4	12.06		14.3749	12.6865	13.2979	14.2543	14.0511	14.4348	14.4276	13.0756	14.0803	14.2169	13.6605	13.322	14.5025	14.4357	14.2377	14.9504	15.1081	15.337	15.8568	15.6364	15.7597	14.6379	14.6125	15.1097
	0.672193	0.784727	1.72277	High	P01602	Immunoglobulin kappa variable 1-5 OS=Homo sapiens OX=9606	IGKV1-5	+	Cluster -803	4.22785	8.42105e-05	3.305	9	1	14	1	117	12.8	8.28		13.6355	13.4648	12.5713	14.6551	13.2357	14.135	12.8209	12.7593	12.6209	11.7484	12.2215	12.7494	15.772	15.6414	15.7543	13.3134	11.8463	12.5441	13.426	12.8539	11.7849	13.9599	12.9704	13.2738
+	1.91738	0.759532	1.69294	High	Q14694	Ubiquitin carboxyl-terminal hydrolase 10 OS=Homo sapiens OX=9606	USP10	+	Cluster -803	8.35076	0	4.032	3	2	24	2	798	87.1	5.31		15.4399	15.8691	15.5312	16.373	16.573	16.1727	16.4123	15.7574	16.3411	16.6424	16.0377	16.1647	16.3961	16.5641	16.3495	15.6246	15.691	15.6779	16.2884	16.3927	16.5301	16.8676	16.8659	16.5302
	0.223585	0.754686	1.68726	High	Q9H3H9	Transcription elongation factor A protein-like 2 OS=Homo sapiens OX=9606	TCEAL2			NaN	NaN	3.327	4	1	3	1	227	25.8	5.94		14.8614	11.0352	11.2141	12.581	12.8238	13.9699	14.7134	13.6279	14.4232	13.5791	13.3533	13.3061	12.9107	13.4501	13.8393	12.7139	12.7636	12.9318	13.8479	13.5574	13.4236	13.8734	13.6635	13.7552
	0.397303	0.74501	1.67599	High	P13995	Bifunctional methylenetetrahydrofolate dehydrogenase/cyclohydrolase, mitochondrial OS=Homo sapiens OX=9606	MTHFD2			NaN	NaN	2.954	3	1	41	1	350	37.9	8.73		15.9024	13.5521	15.9369	15.725	15.9512	15.9503	16.7806	15.9799	13.2909	15.6599	16.8516	15.7447	16.8563	15.9917	15.9637	16.9477	16.9485	17.0166	15.4726	15.4361	16.7929	17.0595	17.033	13.3352
	0.574334	0.743179	1.67386	High	P15170	Eukaryotic peptide chain release factor GTP-binding subunit ERF3A OS=Homo sapiens OX=9606	GSPT1	+	Cluster -803	1.99357	0.00426385	5.948	4	2	21	2	499	55.7	5.62		15.3091	16.8201	14.9437	16.3473	16.4811	16.4741	16.4663	15.3003	16.1906	16.2867	15.8943	16.0142	15.7859	15.9459	15.9599	15.6683	15.6335	15.6713	16.0039	16.0492	16.0402	16.1554	16.0901	15.2544
+	1.86396	0.733422	1.66258	High	P62333	26S proteasome regulatory subunit 10B OS=Homo sapiens OX=9606	PSMC6	+	Cluster -803	5.31801	4.62428e-05	5.28	6	2	41	2	389	44.1	7.49		14.986	14.6701	14.4069	15.5127	15.3428	15.4078	15.4891	13.8363	15.3686	15.2664	14.8273	14.7704	15.3645	15.5863	15.3617	14.3288	14.3171	14.6903	15.6322	15.4784	15.6185	15.4143	15.4119	14.9057
	0.684364	0.725543	1.65352	High	P60763	Ras-related C3 botulinum toxin substrate 3 OS=Homo sapiens OX=9606	RAC3			NaN	NaN	3.262	5	1	15	1	192	21.4	8.15		14.6442	14.099	15.7364	15.6038	15.5413	15.5111	15.1949	12.0081	15.4199	15.3241	14.7958	14.8073	15.3221	15.2319	15.3603	15.252	14.9104	14.9274	15.4127	15.0911	15.5292	15.159	15.2854	14.2315
	0.239068	0.718406	1.64536	High	P01859	Immunoglobulin heavy constant gamma 2 OS=Homo sapiens OX=9606	IGHG2			NaN	NaN	64.299	38	8	933	4	326	35.9	7.59		10.7053	14.416	13.4301	13.6132	14.2592	12.8342	14.9294	11.1353	14.9396	13.1579	12.5668	13.5003	15.069	13.1919	12.8423	11.7368	14.1978	14.979	12.9263	13.7941	14.5101	13.9532	12.8155	14.0429
+	2.23877	0.700349	1.6249	High	P35268	60S ribosomal protein L22 OS=Homo sapiens OX=9606	RPL22	+	Cluster -803	9.69826	0	23.273	39	3	284	3	128	14.8	9.19		19.6701	19.2443	19.3856	20.0733	20.1309	20.1968	20.3185	19.442	20.0984	19.9301	19.5886	19.4924	20.0512	20.1861	20.1371	19.6506	19.6831	19.6911	20.2356	20.3215	20.237	20.0481	20.0648	19.7108
	0.769706	0.700214	1.62475	High	Q9Y4C2	TRPM8 channel-associated factor 1 OS=Homo sapiens OX=9606	TCAF1	+	Cluster -803	3.62417	0.000206262	6.98	3	3	22	3	921	102.1	6.54		15.042	14.9381	16.235	16.0127	16.1776	16.1255	16.1722	15.3267	16.2718	14.9843	16.021	14.5624	16.1182	16.3231	16.1139	14.1752	14.0254	14.0188	14.6914	16.0059	14.9442	16.031	16.1079	15.7433
	0.335457	0.695025	1.61891	High	Q53RT3	Retroviral-like aspartic protease 1 OS=Homo sapiens OX=9606	ASPRV1	+	Cluster -801	3.10097	0.000447368	7.322	4	1	21	1	343	37	5.44		13.6615	15.7871	16.4265	15.7005	15.9395	16.3202	12.3264	11.9082	12.8803	12.9442	11.6066	13.7039	12.3165	13.5587	12.4228	12.9218	12.9667	13.3434	13.37	12.3173	12.2377	13.7619	11.4821	12.969
	0.597584	0.682254	1.60464	High	Q2M2I5	Keratin, type I cytoskeletal 24 OS=Homo sapiens OX=9606	KRT24			NaN	NaN	22.472	6	4	1107	1	525	55.1	4.96		14.9919	15.882	14.1567	15.9082	15.5258	15.6433	15.2825	14.6381	13.2829	12.7024	12.6222	12.3553	15.7706	15.9757	15.8387	11.6605	13.1998	16.5318	16.8699	16.3778	12.2029	13.5912	16.8911	14.8391
	0.467524	0.67483	1.59641	High	Q8TDB6	E3 ubiquitin-protein ligase DTX3L OS=Homo sapiens OX=9606	DTX3L	+	Cluster -803	2.52767	0.00131744	10.755	6	4	54	4	740	83.5	8.06		15.0499	16.4912	16.5049	16.1597	17.4657	16.4451	16.6091	16.5317	16.8993	17.2384	16.8941	16.6634	17.0568	17.1916	17.1171	16.1646	16.7696	16.5568	17.1109	17.0314	17.1636	17.0869	17.1681	16.2136
	0.484063	0.655176	1.57481	High	P31942	Heterogeneous nuclear ribonucleoprotein H3 OS=Homo sapiens OX=9606	HNRNPH3	+	Cluster -800	3.41102	0.000343257	5.624	8	2	9	2	346	36.9	6.87		14.752	12.8128	13.3737	14.3751	14.0658	14.4632	14.9525	13.7569	14.6694	14.105	14.1795	13.9175	14.0024	14.1743	14.2187	15.1025	15.1701	15.0492	14.7444	14.667	14.3262	14.7687	14.6304	14.2419
	1.36838	0.637139	1.55524	High	Q13200	26S proteasome non-ATPase regulatory subunit 2 OS=Homo sapiens OX=9606	PSMD2	+	Cluster -803	1.65943	0.00965466	9.212	5	3	19	3	908	100.1	5.2		15.3629	14.8042	14.7264	15.7187	15.4381	15.6481	14.5573	11.3553	15.1785	15.0216	15.1476	14.9652	15.3822	15.4755	16.8081	14.3749	14.6785	13.6439	15.5349	15.5545	15.5134	15.0007	16.5553	15.1124
	0.358317	0.635888	1.55389	High	Q9BQ50	Three prime repair exonuclease 2 OS=Homo sapiens OX=9606	TREX2			NaN	NaN	20.3	22	4	39	4	236	25.9	6.06		13.6903	14.7392	12.6289	14.7915	14.6882	13.4864	12.2776	11.4762	12.1405	14.2651	13.741	13.9128	13.6153	14.4843	14.1294	13.7574	13.7674	14.5343	14.4684	14.3106	14.4199	14.7413	15.0559	11.7146
	0.965923	0.627962	1.54538	High	Q9P291	Armadillo repeat-containing X-linked protein 1 OS=Homo sapiens OX=9606	ARMCX1	+	Cluster -803	3.26054	0.000411467	4.513	5	2	19	2	453	49.2	9.22		15.5221	14.5373	14.7128	15.5175	15.5333	15.6054	15.5883	15.0804	15.3769	15.4208	15.0506	15.1905	15.5489	15.4569	15.6831	14.4885	12.8675	14.1838	14.52	15.5542	15.9017	16.011	15.8743	15.4791
	0.458423	0.617857	1.53459	High	Q6PJ69	Tripartite motif-containing protein 65 OS=Homo sapiens OX=9606	TRIM65	+	Cluster -803	2.72233	0.000871716	4.083	5	2	14	2	517	57.3	6.7		13.4162	14.8905	15.3234	15.1097	15.072	15.3021	15.6823	14.9365	15.5377	15.1586	15.0675	14.786	14.9106	15.0607	15.0434	14.4456	14.6561	14.7324	15.0224	15.0589	15.0352	15.3509	15.1262	14.9728
	0.563852	0.573982	1.48863	High	Q53EP0	Fibronectin type III domain-containing protein 3B OS=Homo sapiens OX=9606	FNDC3B	+	Cluster -803	2.25104	0.00241004	3.902	2	2	9	2	1204	132.8	5.95		15.9844	15.5262	14.4622	15.9566	15.8925	15.8456	15.6089	14.6179	15.5502	15.5383	14.9721	14.8843	15.4264	15.5808	15.4875	14.9451	15.1011	15.2589	15.7852	15.768	15.4847	15.7619	15.7919	15.391
	0.410754	0.555715	1.4699	High	A0AVT1	Ubiquitin-like modifier-activating enzyme 6 OS=Homo sapiens OX=9606	UBA6			NaN	NaN	8.965	4	4	31	4	1052	117.9	6.14		16.0122	15.9266	14.3572	15.5868	16.1402	16.2361	16.5456	15.8106	12.9632	15.4673	15.8574	15.8754	15.8694	15.9381	16.1058	15.3704	15.0717	15.4166	16.2196	16.1995	16.1335	16.1481	16.0423	15.8964
	0.901271	0.543958	1.45797	High	P14324	Farnesyl pyrophosphate synthase OS=Homo sapiens OX=9606	FDPS	+	Cluster -803	1.86202	0.00590206	2.648	2	1	10	1	419	48.2	6.15		15.9372	15.9745	16.7631	16.7992	16.8937	16.614	16.5982	12.7745	14.7551	16.6238	16.3464	16.5114	16.7587	16.4178	16.6942	16.8276	16.843	17.2737	17.2703	16.9013	16.8219	16.9016	17.0637	14.8065
	0.330132	0.519807	1.43376	High	P41252	Isoleucine--tRNA ligase, cytoplasmic OS=Homo sapiens OX=9606	IARS1	+	Cluster -803	2.00852	0.00409007	7.271	3	3	28	3	1262	144.4	6.15		13.3503	14.8879	15.1016	14.3164	15.1153	15.4676	15.4768	14.6891	15.5484	15.3038	14.8437	14.8528	15.4922	15.5536	15.8752	15.457	15.3777	13.7495	15.9198	15.6341	15.8435	15.5278	15.5402	15.3605
	1.80276	0.512794	1.42681	High	P31947	14-3-3 protein sigma OS=Homo sapiens OX=9606	SFN	+	Cluster -801	7.87196	0	87.708	56	14	455	12	248	27.8	4.74		17.8163	17.3984	17.6909	18.196	18.0942	18.1539	12.4195	13.7373	14.4154	15.7987	14.9917	14.9651	14.6932	14.8402	14.169	13.9413	14.9593	14.2959	15.0085	15.0131	14.9349	13.015	12.2928	12.0275
	0.673948	0.494057	1.4084	High	Q9BQ69	ADP-ribose glycohydrolase MACROD1 OS=Homo sapiens OX=9606	MACROD1	+	Cluster -803	3.36505	0.000363636	5.19	6	2	17	2	325	35.5	9.51		14.7674	15.8892	15.5454	15.9403	15.8926	15.8513	16.3266	15.0305	16.0295	15.5708	15.4101	15.6837	15.8266	16.0932	15.8906	15.2206	15.3524	15.4913	15.6842	16.1912	15.8366	16.2993	16.0992	15.5612
	1.93817	0.480055	1.3948	High	Q02878	60S ribosomal protein L6 OS=Homo sapiens OX=9606	RPL6	+	Cluster -800	10.3267	0	25.609	24	7	242	7	288	32.7	10.58		18.3101	18.2369	18.0452	18.6612	18.8141	18.5571	18.5501	17.7888	18.602	18.0698	17.7204	17.4984	17.7397	17.9565	18.1512	18.2623	17.8682	18.3107	19.9361	19.9911	20.0159	18.3789	18.2704	17.9831
	0.344549	0.468128	1.38331	High	P12004	Proliferating cell nuclear antigen OS=Homo sapiens OX=9606	PCNA			NaN	NaN	3.111	5	1	18	1	261	28.8	4.69		14.0303	15.6403	15.5983	15.7906	15.7013	15.1814	15.6381	15.1928	15.2709	12.619	14.6651	14.5728	15.5719	15.4891	15.4092	15.298	15.2825	15.6152	15.6178	15.6032	15.732	15.7139	15.2448	13.6591
	1.59049	0.465209	1.38052	High	P84098	60S ribosomal protein L19 OS=Homo sapiens OX=9606	RPL19	+	Cluster -800	11.183	0	6.392	9	1	62	1	196	23.5	11.47		15.7576	16.0415	15.6839	16.2242	16.2053	16.4491	16.7228	15.8607	16.7212	16.2904	16.2716	16.4094	16.5712	16.8403	16.8464	16.6602	16.6846	16.6105	17.8368	17.814	17.8221	16.6663	16.6404	16.1318
	1.23449	0.462733	1.37815	High	Q07955	Serine/arginine-rich splicing factor 1 OS=Homo sapiens OX=9606	SRSF1	+	Cluster -803	5.042	5.31915e-05	7.079	9	2	42	2	248	27.7	10.36		15.7275	15.4135	15.1243	15.9267	15.8883	15.8386	15.9642	14.2841	15.5462	15.6016	15.2919	15.1545	15.7369	15.9573	15.8174	16.1899	16.2057	16.353	16.1633	16.2394	16.1446	15.8679	15.8441	15.144
+	2.25425	0.450172	1.3662	High	P22234	Bifunctional phosphoribosylaminoimidazole carboxylase/phosphoribosylaminoimidazole succinocarboxamide synthetase OS=Homo sapiens OX=9606	PAICS	+	Cluster -803	10.8381	0	15.161	8	3	204	3	425	47	7.23		17.6205	17.3776	17.3728	17.8808	17.916	17.9245	18.0908	17.3807	18.0059	17.9378	17.8797	17.6685	18.1061	18.1979	18.0931	17.9232	17.8469	17.9164	18.0097	18.0463	18.102	18.0287	17.9407	17.7304
	0.899504	0.444042	1.36041	High	P05141	ADP/ATP translocase 2 OS=Homo sapiens OX=9606	SLC25A5	+	Cluster -803	6.76437	5.04202e-05	22.305	16	5	326	2	298	32.8	9.69	Met-loss+Acetyl [N-Term]	18.4867	17.7249	17.9085	18.5175	18.4807	18.454	18.9475	18.217	18.7399	18.1263	17.9864	17.8785	18.3831	18.5512	18.375	17.5812	17.5759	17.5995	18.6459	18.7076	18.6684	18.6047	18.4838	18.1882
+	2.6168	0.44341	1.35981	High	Q9UHX1	Poly(U)-binding-splicing factor PUF60 OS=Homo sapiens OX=9606	PUF60	+	Cluster -803	9.91654	0	18.716	9	4	153	4	559	59.8	5.29		16.8707	16.9629	16.9391	17.2658	17.3675	17.4696	17.2	16.7897	17.4724	17.1296	16.8793	16.7211	17.3411	17.5411	17.5435	17.2328	17.2393	17.2926	17.6383	17.7356	17.741	17.7362	17.6338	17.2658
	0.829812	0.426378	1.34386	High	Q7L576	Cytoplasmic FMR1-interacting protein 1 OS=Homo sapiens OX=9606	CYFIP1	+	Cluster -803	2.36461	0.00190258	17.008	5	5	67	5	1253	145.1	6.9		16.6507	16.9179	17.3665	17.6132	17.3832	17.2179	19.18	16.9312	18.7709	16.7291	16.754	16.1904	17.0535	17.2305	17.214	15.7509	16.3752	15.2559	17.2361	16.8355	19.3918	17.222	17.3705	17.162
	0.378803	0.422831	1.34056	High	P61160	Actin-related protein 2 OS=Homo sapiens OX=9606	ACTR2			NaN	NaN	18.961	9	4	119	4	394	44.7	6.74		17.5598	17.6279	18.0502	17.2843	18.5693	18.6527	16.8606	18.601	16.9042	16.8784	16.688	16.7191	17.061	16.9508	17.0556	17.0939	18.6709	17.5133	17.4016	17.4789	17.6208	17.5589	17.6313	16.8878
	0.300658	0.41872	1.33674	High	Q04917	14-3-3 protein eta OS=Homo sapiens OX=9606	YWHAH	+	Cluster -800	4.6871	4.83092e-05	20.056	16	4	223	2	246	28.2	4.84		13.5536	14.0616	12.9065	14.4257	13.0141	14.3381	14.5705	12.8351	11.5497	13.9614	12.6421	12.278	13.5143	13.5875	13.5577	17.1659	17.233	17.1662	12.9541	13.5283	13.4648	13.0079	13.5639	12.8279
	0.176211	0.417956	1.33603	High	A0A0B4J2D5	Putative glutamine amidotransferase-like class 1 domain-containing protein 3B, mitochondrial OS=Homo sapiens OX=9606	GATD3B			NaN	NaN	8.004	17	3	26	3	268	28.1	8.27		12.9426	15.5885	15.3545	14.6174	14.879	15.6431	15.2198	15.5162	16.9844	15.6733	14.224	14.4335	16.5751	15.1557	15.8373	14.2045	13.8379	15.1915	15.6468	15.8105	15.6894	15.1079	16.1474	16.1869
	1.69552	0.414167	1.33253	High	P00973	2'-5'-oligoadenylate synthase 1 OS=Homo sapiens OX=9606	OAS1	+	Cluster -803	6.43828	4.61538e-05	24.458	19	7	208	7	400	46	8.22		19.6778	19.527	19.8938	20.1118	20.168	20.0613	20.1853	19.2246	20.2454	19.9644	19.586	19.7623	19.6388	20.0182	19.89	19.0616	18.9215	19.0383	20.2078	20.1642	20.1277	19.83	19.7538	19.9812
	0.438553	0.411401	1.32998	High	Q9Y3D9	28S ribosomal protein S23, mitochondrial OS=Homo sapiens OX=9606	MRPS23	+	Cluster -800	7.22547	5.50459e-05	6.986	17	3	14	3	190	21.8	8.9		14.2927	14.3401	15.4109	15.1159	15.373	14.789	15.231	14.0929	15.1678	15.1912	14.9414	14.8904	15.5213	15.5599	15.3899	16.9614	16.8426	17.0522	15.6749	15.7795	15.763	15.3688	15.3638	14.9743
	1.61773	0.409321	1.32806	High	P46778	60S ribosomal protein L21 OS=Homo sapiens OX=9606	RPL21	+	Cluster -800	8.30383	0	7.589	16	2	19	2	160	18.6	10.49		15.0475	15.376	15.3926	15.6513	15.7371	15.6558	16.0094	15.3959	16.0755	15.2387	15.5487	14.9601	15.5214	15.7674	15.5497	16.1377	15.6138	15.4496	17.5968	17.5123	17.3783	15.5468	15.7226	15.5578
	1.34488	0.397545	1.31726	High	P35269	General transcription factor IIF subunit 1 OS=Homo sapiens OX=9606	GTF2F1	+	Cluster -803	5.52716	3.62538e-05	3.862	2	1	62	1	517	58.2	7.49		20.8797	20.5357	20.8748	21.2764	21.1952	21.0114	20.9819	20.0549	20.8896	20.9823	20.5323	20.5171	21.0212	21.0854	20.9042	21.124	20.9767	21.0046	20.8618	21.1196	21.0974	20.8584	20.7687	20.6719
	0.750514	0.389454	1.3099	High	P62910	60S ribosomal protein L32 OS=Homo sapiens OX=9606	RPL32	+	Cluster -800	4.57785	6.54206e-05	12.497	27	3	71	3	135	15.9	11.33		16.254	15.7782	15.6071	16.0127	16.491	16.3039	15.5898	15.2565	15.9193	15.6766	15.1063	15.3297	15.9141	16.1917	15.987	16.5012	16.3028	16.3883	18.1478	17.9849	17.8905	14.3549	16.3205	15.4642
	0.392451	0.371541	1.29373	High	P22102	Trifunctional purine biosynthetic protein adenosine-3 OS=Homo sapiens OX=9606	GART	+	Cluster -803	4.21456	9.2437e-05	12.528	4	4	77	4	1010	107.7	6.7		16.0974	15.6939	16.9605	16.6556	16.3615	16.8493	17.1433	16.413	16.8584	16.9883	16.7021	16.5147	16.9266	16.9676	16.8106	16.1233	16.1483	16.1664	17.0388	17.0325	17.0776	17.0848	16.8976	16.4159
	0.576826	0.364708	1.28762	High	Q92905	COP9 signalosome complex subunit 5 OS=Homo sapiens OX=9606	COPS5	+	Cluster -803	3.92023	0.000135458	3.533	3	1	10	1	334	37.6	6.54		13.3376	14.0326	14.239	14.1457	14.3735	14.1842	13.9047	13.3401	13.9267	14.2356	13.7235	14.1738	14.6947	14.4454	14.4454	14.1597	14.3981	14.1355	14.081	14.1491	14.4229	14.4222	14.1597	14.2625
	1.21453	0.36278	1.2859	High	P41250	Glycine--tRNA ligase OS=Homo sapiens OX=9606	GARS1	+	Cluster -803	8.05897	0	7.412	3	2	42	2	739	83.1	7.03		16.0485	16.3021	16.1382	16.2917	16.6046	16.681	16.848	16.2858	16.7415	16.6815	16.5568	16.5926	16.7551	17.0499	16.8139	16.2617	16.3107	16.5279	16.6906	16.8289	16.7576	16.4615	16.4544	16.2463
	0.712955	0.348643	1.27336	High	Q96EE3	Nucleoporin SEH1 OS=Homo sapiens OX=9606	SEH1L	+	Cluster -803	4.88638	5.06329e-05	2.809	3	1	18	1	360	39.6	8.09		13.7569	14.0265	13.7033	13.8073	14.2326	14.4928	14.498	13.4299	14.3155	14.2049	14.1872	13.7376	14.011	13.981	14.0269	13.5913	13.6209	13.9371	13.8916	14.2272	13.9397	14.3148	14.0848	14.0257
	0.321046	0.343467	1.2688	High	Q9UM22	Mammalian ependymin-related protein 1 OS=Homo sapiens OX=9606	EPDR1	+	Cluster -800	3.87419	0.00015625	11.783	13	3	22	3	224	25.4	6.6		15.821	15.7697	17.0373	16.2715	16.6359	16.751	17.2919	16.5752	17.299	16.8111	16.3847	16.6118	16.5981	16.3756	16.8106	17.0268	16.6916	17.2278	16.6212	16.9756	17.0578	17.1988	17.2931	17.1242
	0.931603	0.34286	1.26827	High	Q00839	Heterogeneous nuclear ribonucleoprotein U OS=Homo sapiens OX=9606	HNRNPU	+	Cluster -800	5.78885	3.82166e-05	30.144	12	7	156	7	825	90.5	6		18.3628	18.0497	17.8573	18.2552	18.5248	18.5184	18.8585	17.6333	19.109	18.5588	17.9751	18.227	18.4121	18.2315	18.2452	19.1188	19.0062	19.1673	18.6449	18.901	18.9445	18.4045	18.1788	17.7751
	2.2399	0.340732	1.2664	High	Q8IXB1	DnaJ homolog subfamily C member 10 OS=Homo sapiens OX=9606	DNAJC10	+	Cluster -803	7.95985	0	19.675	9	5	125	5	793	91	7.18		17.497	17.6526	17.4519	17.9083	17.8669	17.8485	18.2593	17.7829	18.6216	17.8505	17.3634	17.3275	17.6292	17.6512	17.8889	17.2105	17.0987	17.2777	17.8735	17.8022	18	18.3409	17.989	17.998
	0.332888	0.330749	1.25767	High	P20700	Lamin-B1 OS=Homo sapiens OX=9606	LMNB1	+	Cluster -800	2.84272	0.000700315	11.062	8	4	49	3	586	66.4	5.16		14.9249	14.6868	15.8066	15.2448	15.9251	15.2406	15.8568	14.3651	15.909	14.9331	14.7573	14.7833	15.4219	15.7178	15.7165	16.0135	16.0526	15.9095	15.5093	15.5949	15.5399	15.0961	15.5916	15.1858
	1.7315	0.327628	1.25495	High	P26599	Polypyrimidine tract-binding protein 1 OS=Homo sapiens OX=9606	PTBP1	+	Cluster -803	5.00363	5.24934e-05	19.362	11	5	127	5	557	59.6	9.16		17.9822	18.1536	18.0649	18.2583	18.4373	18.488	18.7198	17.5112	18.2595	18.2584	18.0357	18.1456	18.6799	18.6612	18.7616	18.3454	18.2498	18.1289	18.9385	18.9173	18.6018	18.9653	18.8694	17.8747
	0.318896	0.318072	1.24666	High	O75190	DnaJ homolog subfamily B member 6 OS=Homo sapiens OX=9606	DNAJB6	+	Cluster -803	2.19219	0.00272199	2.67	3	1	5	1	326	36.1	9.16		14.0881	15.0276	15.0919	15.4991	15.0229	14.6399	14.6749	13.0533	13.7365	14.4149	14.2555	14.2227	14.8928	14.8201	14.7733	15.3127	15.3682	14.6433	14.4561	14.6362	14.2111	14.6885	14.3809	14.7261
	0.213139	0.316995	1.24573	High	O95630	STAM-binding protein OS=Homo sapiens OX=9606	STAMBP			NaN	NaN	5.205	4	2	22	2	424	48	6.29		15.9243	15.5085	14.0249	15.512	15.4091	15.4876	15.7486	14.853	15.6818	15.325	14.8464	15.0397	15.3685	15.5244	15.3847	14.7073	14.7305	14.7445	15.3683	15.4787	15.4034	15.2764	15.3376	14.8916
	0.930952	0.309873	1.2396	High	Q13085	Acetyl-CoA carboxylase 1 OS=Homo sapiens OX=9606	ACACA	+	Cluster -803	6.2801	4.30108e-05	12.42	3	5	61	5	2346	265.4	6.37		16.1824	15.9518	16.2714	16.5051	16.2084	16.6217	17.0046	16.2061	16.5366	16.6668	16.4725	16.4011	16.6709	16.7938	16.7298	15.8523	16.2934	16.303	16.6661	16.8338	16.6148	16.909	16.8463	16.5361
	0.414395	0.292589	1.22484	High	P00747	Plasminogen OS=Homo sapiens OX=9606	PLG			NaN	NaN	21.211	12	7	47	7	810	90.5	7.24		13.0447	13.7721	14.0352	13.9037	13.8272	13.9989	13.0354	13.3607	13.7878	13.9938	13.9636	11.3894	13.2505	12.6698	13.659	13.7411	13.5985	14.1254	14.0874	13.7595	14.034	12.9886	13.8421	13.1204
	0.401537	0.27312	1.20842	High	P61769	Beta-2-microglobulin OS=Homo sapiens OX=9606	B2M			NaN	NaN	7.659	27	2	42	2	119	13.7	6.52		17.0529	17.8715	17.9146	17.7542	17.9608	17.9433	18.012	16.3922	16.2862	13.9234	16.8747	17.2514	17.8695	12.8209	12.406	17.7685	13.1282	12.3595	14.1171	14.0541	12.4205	17.8864	13.2815	16.4391
	0.19293	0.271888	1.20739	High	Q8N1G4	Leucine-rich repeat-containing protein 47 OS=Homo sapiens OX=9606	LRRC47			NaN	NaN	10.51	8	4	25	4	583	63.4	8.28		15.17	16.2355	16.3318	16.7959	16.3027	15.4545	16.9381	15.8176	15.7038	16.471	16.3467	15.4884	16.3076	16.1272	16.1771	15.7264	16.039	15.8884	16.1434	16.1922	16.3786	16.0413	16.1988	15.9215
	2.32549	0.26724	1.2035	High	Q06124	Tyrosine-protein phosphatase non-receptor type 11 OS=Homo sapiens OX=9606	PTPN11	+	Cluster -803	8.52522	0	6.245	5	3	13	3	593	68	7.3		16.9222	16.8001	16.9469	17.1802	17.1522	17.1385	17.2384	16.3147	17.2062	17.0343	16.5692	16.7202	16.8691	17.0207	16.9247	16.393	16.2396	16.202	16.8721	17.0155	16.8567	17.236	17.2065	16.8296
	1.003	0.26686	1.20319	High	P52566	Rho GDP-dissociation inhibitor 2 OS=Homo sapiens OX=9606	ARHGDIB	+	Cluster -803	4.26998	6.85225e-05	3.318	6	1	14	1	201	23	5.21		15.3942	15.042	15.1096	15.382	15.5742	15.3902	15.368	14.0835	15.1197	15.1278	15.2669	15.1701	15.1177	15.249	15.0284	15.0853	15.2055	15.1252	15.2556	15.2358	15.0913	15.2107	15.0488	14.6332
	0.0954348	0.26503	1.20166	High	Q9BQE5	Apolipoprotein L2 OS=Homo sapiens OX=9606	APOL2			NaN	NaN	2.899	3	1	21	1	337	37.1	6.74		16.925	14.9162	15.1708	16.5912	14.4083	16.8076	16.3918	14.7427	15.1981	14.9406	16.0296	15.1829	14.9968	15.0028	15.2387	13.1368	14.7057	16.4972	16.4632	16.9126	16.4667	10.99	13.3963	15.0208
	0.703942	0.264969	1.20161	High	Q9UJX4	Anaphase-promoting complex subunit 5 OS=Homo sapiens OX=9606	ANAPC5	+	Cluster -803	1.88396	0.00560104	16.815	9	5	14	5	755	85	6.87		14.4327	14.055	14.6202	14.6489	14.7009	14.5531	15.2449	13.1213	14.3261	14.7012	14.1103	14.0729	14.672	14.3733	14.529	14.6828	14.5544	15.4953	15.077	14.7244	14.8716	14.6197	14.7672	14.2399
	0.672967	0.264507	1.20123	High	P31040	Succinate dehydrogenase [ubiquinone] flavoprotein subunit, mitochondrial OS=Homo sapiens OX=9606	SDHA	+	Cluster -803	3.24969	0.000409396	11.597	5	3	100	3	664	72.6	7.39		16.0457	16.1096	16.449	16.4354	16.2625	16.6999	16.4753	16.8659	16.1093	16.8691	16.7315	16.5003	16.8238	17.0407	17.0091	16.4683	16.6498	16.6365	17.0826	16.9485	17.152	17.0593	16.9026	16.5655
	0.0884555	0.261751	1.19893	High	P02794	Ferritin heavy chain OS=Homo sapiens OX=9606	FTH1			NaN	NaN	2.904	5	1	19	1	183	21.2	5.55		16.1169	12.7374	15.5787	14.9196	15.2126	15.086	13.6367	15.3181	14.6281	15.2049	14.9655	15.4417	15.8591	16.0828	16.0011	15.866	15.7536	15.8508	15.2521	15.6753	15.5731	15.2016	15.3562	14.7426
	0.347875	0.261518	1.19874	High	O75439	Mitochondrial-processing peptidase subunit beta OS=Homo sapiens OX=9606	PMPCB	+	Cluster -803	2.50883	0.00135503	4.947	4	2	17	2	489	54.3	6.83		14.9404	15.4793	15.5714	15.6158	15.1615	15.9984	15.9147	14.5229	15.478	15.669	15.5114	15.2833	15.6194	15.6555	15.6264	15.1654	15.4693	15.2713	16.0385	15.2357	15.6907	15.689	15.6272	15.3809
	0.946468	0.249249	1.18859	High	P07741	Adenine phosphoribosyltransferase OS=Homo sapiens OX=9606	APRT	+	Cluster -803	6.32704	4.36364e-05	2.966	6	1	7	1	180	19.6	6.02		15.9383	15.6613	15.8965	15.9906	15.9959	16.2573	16.1478	14.9225	15.9669	16.1748	16.0817	16.2277	16.2761	16.1063	16.1237	16.275	16.1222	15.9719	16.2285	16.2288	16.31	16.2829	16.4154	15.9495
	0.549104	0.248018	1.18757	High	P55265	Double-stranded RNA-specific adenosine deaminase OS=Homo sapiens OX=9606	ADAR	+	Cluster -803	3.91046	0.000135189	13.35	4	5	167	5	1226	136	8.65		17.4125	17.4534	17.501	17.5467	18.0974	17.4668	18.286	17.342	17.7901	17.5646	17.3264	17.4249	17.6341	17.7949	18.256	17.0831	16.8644	16.2415	17.4013	17.8149	17.7079	17.8629	17.8573	17.6231
	0.514772	0.247211	1.18691	High	P11802	Cyclin-dependent kinase 4 OS=Homo sapiens OX=9606	CDK4	+	Cluster -803	3.61451	0.000211679	8.12	9	3	106	2	303	33.7	7.01		15.3335	15.017	15.7096	15.7078	15.6124	15.4815	15.8357	15.3126	15.8615	15.7032	15.2609	15.3304	16.1267	16.1707	16.0806	15.7561	14.6719	15.4996	15.7208	15.9662	16.0764	15.9121	15.8923	15.4335
	1.20988	0.246773	1.18655	High	P62136	Serine/threonine-protein phosphatase PP1-alpha catalytic subunit OS=Homo sapiens OX=9606	PPP1CA	+	Cluster -803	3.14728	0.000431177	15.963	13	4	144	2	330	37.5	6.33		15.8124	15.8884	15.6322	15.9502	15.9834	16.1398	16.2372	15.1769	16.1843	15.8937	15.6599	15.7964	16.0239	16.0445	16.1517	14.9808	15.8212	16.0894	16.1893	16.2041	16.2352	16.2076	16.1418	15.755
	0.442098	0.243436	1.18381	High	Q15366	Poly(rC)-binding protein 2 OS=Homo sapiens OX=9606	PCBP2	+	Cluster -803	4.18734	9.12863e-05	36.372	25	6	471	3	365	38.6	6.79		17.2474	16.9801	17.2161	17.8308	17.1332	17.21	18.6517	16.8939	18.6817	17.9429	17.7491	17.8482	17.7807	17.1752	17.8359	17.2143	17.3858	17.5462	18.1425	17.9207	18.1373	18.2065	18.1378	17.913
	0.404825	0.241611	1.18231	High	Q76M96	Coiled-coil domain-containing protein 80 OS=Homo sapiens OX=9606	CCDC80	+	Cluster -803	3.80307	0.000161538	18.072	5	5	90	5	950	108.1	9.72		17.445	17.5191	18.1733	17.7615	17.9901	18.1106	18.447	17.5261	18.3229	17.2386	17.8665	17.625	18.2522	18.1614	18.2979	18.1567	17.9335	18.0112	18.336	18.4089	18.1406	18.231	18.2334	18.2084
	0.518245	0.237869	1.17925	High	P03928	ATP synthase protein 8 OS=Homo sapiens OX=9606	MT-ATP8	+	Cluster -803	2.07328	0.00356216	2.696	13	1	29	1	68	8	9.91		16.0761	15.5361	15.7189	15.818	16.2449	15.9818	15.7033	16.5253	16.8307	15.3584	15.3743	15.0976	15.3817	15.3866	15.2581	15.2132	15.11	14.885	15.4679	15.4792	15.3195	15.6353	15.3972	16.2606
	0.395194	0.230388	1.17315	High	Q8IXQ6	Protein mono-ADP-ribosyltransferase PARP9 OS=Homo sapiens OX=9606	PARP9	+	Cluster -803	4.85537	4.97512e-05	7.506	3	2	42	2	854	96.3	7.91		15.3078	16.1041	15.9416	16.0926	15.9555	15.9966	16.0856	14.9873	15.7973	14.9176	15.6698	15.5552	15.9345	16.066	15.8859	14.5041	14.2445	14.4757	15.9103	15.9763	16.0008	16.0857	16.0533	15.6405
	0.487978	0.226889	1.17031	High	Q01581	Hydroxymethylglutaryl-CoA synthase, cytoplasmic OS=Homo sapiens OX=9606	HMGCS1	+	Cluster -803	3.0747	0.000469821	4.475	5	2	5	2	520	57.3	5.41		16.2345	15.6343	16.079	16.389	16.1614	16.078	16.0504	14.6832	15.6669	15.9023	15.7357	15.6105	15.7437	15.8479	15.6102	15.5809	15.3918	15.5742	15.5707	15.6533	15.4686	15.6926	15.6712	14.8626
	0.176745	0.224207	1.16813	High	P09497	Clathrin light chain B OS=Homo sapiens OX=9606	CLTB			NaN	NaN	6.25	8	2	19	2	229	25.2	4.64		14.3006	15.7858	15.6841	15.5302	15.3843	15.5286	15.3293	12.3248	15.2672	15.3286	14.8359	14.8336	15.2823	15.5425	15.4913	15.1704	14.8386	15.1374	15.3567	15.3334	15.2765	15.2751	15.2495	14.784
	0.242533	0.206123	1.15358	High	Q8WVV9	Heterogeneous nuclear ribonucleoprotein L-like OS=Homo sapiens OX=9606	HNRNPLL	+	Cluster -803	4.41148	7.19101e-05	10.093	6	3	46	3	542	60	7.72		16.2588	15.431	16.4363	15.9926	16.4008	16.351	16.5049	15.7344	16.4719	16.2914	16.1021	16.1093	16.2764	16.3721	16.381	15.4755	15.482	15.4108	16.4299	16.2519	16.4428	16.3852	16.4098	16.2644
	0.0576663	0.200409	1.14902	High	Q9BVC6	Transmembrane protein 109 OS=Homo sapiens OX=9606	TMEM109			NaN	NaN	3.933	5	1	20	1	243	26.2	10.48		16.167	13.3466	12.1106	14.1927	14.008	14.0248	13.9951	13.5462	13.9896	14.1622	13.6989	13.9829	13.9914	14.2263	14.0649	14.5627	14.4716	14.376	14.3245	14.5723	14.4728	14.7367	14.5539	14.3344
	0.369922	0.19659	1.14599	High	Q9UM13	Anaphase-promoting complex subunit 10 OS=Homo sapiens OX=9606	ANAPC10	+	Cluster -803	3.40244	0.00034904	4.751	6	1	5	1	185	21.2	9.06		13.8158	13.1641	13.7474	13.9354	13.6786	13.703	13.8543	12.7489	13.4148	13.747	13.3688	13.2886	13.9222	13.9969	13.7452	13.3154	13.4983	13.4118	13.7056	13.7046	13.5768	13.8609	13.7074	13.2449
	0.362973	0.192876	1.14304	High	P29353	SHC-transforming protein 1 OS=Homo sapiens OX=9606	SHC1	+	Cluster -803	7.02644	5.30973e-05	5.329	5	2	36	2	583	62.8	6.44		14.9625	14.4845	15.2159	15.0156	15.0327	15.1932	15.5121	14.8036	15.4987	15.3172	15.0883	14.9896	15.3454	15.3615	15.4771	13.9766	13.9927	14.163	14.7386	15.1296	15.3357	15.545	15.4926	15.1362
	0.601814	0.18618	1.13775	High	Q9BZZ5	Apoptosis inhibitor 5 OS=Homo sapiens OX=9606	API5	+	Cluster -803	1.67182	0.0093616	2.962	2	1	17	1	524	59	7.34		14.4313	14.475	14.6973	14.5044	14.7826	14.8752	12.3191	13.7043	14.522	14.3404	14.4667	14.6556	14.7489	14.8202	14.5989	14.3779	14.1187	14.4425	14.7704	14.8871	14.9585	15.158	15.1089	14.8092
	0.668096	0.186138	1.13771	High	Q9Y277	Voltage-dependent anion-selective channel protein 3 OS=Homo sapiens OX=9606	VDAC3	+	Cluster -800	4.58051	6.55738e-05	10.89	12	3	51	2	283	30.6	8.66	Met-loss+Acetyl [N-Term]	13.5043	13.5054	13.6662	13.5532	13.9487	13.7325	13.6641	12.4886	13.8702	13.0778	12.8948	13.5783	13.626	13.5027	13.742	15.0222	15.2026	15.5299	14.3485	13.622	13.5129	14.4346	13.9637	12.8697
	0.391252	0.183111	1.13533	High	Q13435	Splicing factor 3B subunit 2 OS=Homo sapiens OX=9606	SF3B2	+	Cluster -803	4.86599	5e-05	9.235	4	3	40	3	895	100.2	5.67		17.7193	17.1837	17.0845	17.4965	17.5078	17.5326	17.8282	17.1877	17.6358	17.3264	16.9858	16.8556	17.7285	17.5519	17.6511	17.2978	17.5595	17.5534	17.8135	17.5856	17.589	17.8553	17.7812	17.5198
	0.866237	0.177221	1.1307	High	P13796	Plastin-2 OS=Homo sapiens OX=9606	LCP1	+	Cluster -803	2.71445	0.000886154	29.96	13	8	148	4	627	70.2	5.43		16.6446	16.9276	16.8739	16.9471	16.9603	17.0703	16.7386	15.1417	16.5835	16.9765	16.4678	16.1752	16.8584	16.6894	16.8144	16.8813	16.9191	17.1475	17.0179	16.4704	16.9963	16.8634	16.9163	16.0994
	0.159938	0.174703	1.12873	High	P0DP25	Calmodulin-3 OS=Homo sapiens OX=9606	CALM3			NaN	NaN	9.923	21	3	45	3	149	16.8	4.22		13.6987	13.4015	14.6684	13.8915	14.3835	14.0177	15.0788	11.2474	14.4512	14.3477	15.0495	13.7413	13.9615	14.7979	14.3609	14.8141	14.8177	13.4496	14.8206	14.5029	13.4934	14.3431	15.3091	13.0779
	0.470982	0.172803	1.12725	High	P24941	Cyclin-dependent kinase 2 OS=Homo sapiens OX=9606	CDK2	+	Cluster -803	3.85874	0.000155945	5.661	7	2	79	1	298	33.9	8.68		14.5945	14.2787	14.0744	14.584	14.4582	14.4238	14.8529	14.1343	14.7588	14.542	13.5098	13.8699	14.4938	14.4194	14.4541	13.4816	13.8795	13.7549	14.2926	14.4752	14.5502	14.7259	14.6508	14.1461
	0.19063	0.16229	1.11906	High	O43175	D-3-phosphoglycerate dehydrogenase OS=Homo sapiens OX=9606	PHGDH	+	Cluster -803	3.40864	0.00034965	11.652	7	3	59	3	533	56.6	6.71		15.965	16.3269	17.07	16.6188	16.6526	16.5773	16.622	15.8296	16.5839	16.5022	16.2892	16.1097	16.9301	16.9502	16.9516	16.3101	16.2295	16.1796	16.6159	16.6954	16.484	16.5994	16.6018	16.23
	0.455711	0.15716	1.11509	High	Q8NB16	Mixed lineage kinase domain-like protein OS=Homo sapiens OX=9606	MLKL	+	Cluster -803	6.82084	5.10638e-05	5.057	3	1	28	1	471	54.4	8.82		15.8166	15.6647	15.3581	15.6449	15.8317	15.8343	15.8591	14.7461	15.5982	15.6904	15.4024	15.636	15.3544	15.3375	15.32	14.6134	14.4749	14.2654	15.4253	15.57	15.5197	15.2895	15.1116	14.6883
	1.24708	0.149827	1.10944	High	O75475	PC4 and SFRS1-interacting protein OS=Homo sapiens OX=9606	PSIP1	+	Cluster -803	2.84471	0.000695103	6.088	3	2	154	2	530	60.1	9.13		17.7346	17.8729	17.8357	17.9715	17.8944	18.0267	17.8463	16.2166	17.8058	17.7574	17.6922	17.4523	17.7489	17.7316	17.6715	17.8674	17.794	17.5634	17.7324	17.7992	17.7163	17.8198	17.6581	17.2187
	0.0813985	0.14968	1.10932	High	O15145	Actin-related protein 2/3 complex subunit 3 OS=Homo sapiens OX=9606	ARPC3	+	Cluster -803	2.30101	0.00217045	9.315	12	2	36	2	178	20.5	8.59		15.7054	14.0924	13.9466	14.8728	15.2066	14.114	17.1869	16.265	15.2143	15.141	15.7224	15.985	16.0729	16.6202	16.4186	15.6494	14.6614	16.3677	16.6769	16.6308	15.4211	16.6862	16.5452	16.0502
	0.135162	0.149167	1.10893	High	P60953	Cell division control protein 42 homolog OS=Homo sapiens OX=9606	CDC42			NaN	NaN	9.376	17	3	59	3	191	21.2	6.55		15.6744	16.8071	16.843	16.3798	16.8442	16.5481	16.7169	15.77	16.4583	16.729	16.4403	16.1614	16.4178	16.5313	16.3839	15.9732	16.2928	15.4159	16.4752	16.5032	16.3203	16.3102	16.1103	16.0833
	0.946182	0.146749	1.10707	High	Q14192	Four and a half LIM domains protein 2 OS=Homo sapiens OX=9606	FHL2	+	Cluster -803	6.05802	4.05405e-05	10.007	12	3	116	3	279	32.2	7.55		16.8866	16.7056	16.7122	16.9965	16.8901	16.858	17.1706	16.3551	16.9487	16.9622	16.495	16.4449	16.6978	16.908	16.8	16.5879	16.5492	16.5304	16.5764	16.6605	16.7941	16.8023	16.7744	16.3686
	0.0388358	0.142617	1.10391	High	Q9P2J5	Leucine--tRNA ligase, cytoplasmic OS=Homo sapiens OX=9606	LARS1			NaN	NaN	2.625	1	1	6	1	1176	134.4	7.3		12.7206	13.5681	15.4027	15.0213	12.1126	14.9853	15.3978	14.3529	15.5844	14.781	14.7982	14.8901	15.1478	15.0783	14.6702	14.819	14.5497	14.2914	14.9579	15.0414	14.7828	14.7787	14.5755	14.7012
	0.0583099	0.140763	1.10249	High	Q9NVD7	Alpha-parvin OS=Homo sapiens OX=9606	PARVA			NaN	NaN	4.621	4	1	30	1	372	42.2	5.95		15.756	15.6509	13.2084	15.1268	14.8799	15.0307	15.4611	14.9791	15.2114	14.8	15.1404	14.5775	14.9281	14.9517	14.8751	14.5331	14.5938	14.3304	15.0798	15.0222	14.727	15.2891	15.2272	15.0801
	0.184875	0.140098	1.10198	High	Q2TAA2	Isoamyl acetate-hydrolyzing esterase 1 homolog OS=Homo sapiens OX=9606	IAH1			NaN	NaN	8.068	19	3	26	3	248	27.6	5.3		16.1954	15.3335	16.1812	16.0564	15.9532	16.1207	16.2276	15.5699	16.5039	16.0728	15.6945	15.5789	15.6937	14.8718	15.7925	14.2656	15.3787	14.2333	15.6336	15.928	16.1199	14.6559	15.4508	16.1259
	0.189885	0.137608	1.10008	High	P62491	Ras-related protein Rab-11A OS=Homo sapiens OX=9606	RAB11A	+	Cluster -803	2.00073	0.00417989	7.603	14	3	29	3	216	24.4	6.57		16.8524	16.1801	16.0008	16.6777	16.3616	16.4067	16.3485	15.4791	16.1267	16.3103	15.7006	15.6693	16.0018	16.0819	16.1173	16.0516	15.9438	16.0099	15.9688	15.678	16.0526	15.9592	16.2141	15.587
	0.45477	0.136862	1.09951	High	P12236	ADP/ATP translocase 3 OS=Homo sapiens OX=9606	SLC25A6	+	Cluster -803	8.2416	0	22.095	27	6	343	3	298	32.8	9.74	Met-loss+Acetyl [N-Term]	17.5717	17.7775	17.9783	17.8668	17.8486	18.0226	18.0959	17.176	18.0192	17.5071	17.4771	17.2967	17.4326	17.5464	17.6675	16.6071	16.7948	16.8589	17.5985	17.7825	17.6712	17.8731	17.8464	17.6238
	0.198999	0.129634	1.09402	High	Q03252	Lamin-B2 OS=Homo sapiens OX=9606	LMNB2	+	Cluster -803	2.25911	0.0023743	6.627	5	3	48	2	620	69.9	5.59		16.8333	16.0812	16.1093	16.4386	16.4094	16.5647	16.4531	15.3872	16.4158	16.3202	16.0593	15.7239	16.1677	16.2591	16.0772	16.2844	16.3383	16.2199	16.1861	16.2988	16.451	16.2191	16.2245	15.9807
	0.0731047	0.126527	1.09166	High	Q9NYL4	Peptidyl-prolyl cis-trans isomerase FKBP11 OS=Homo sapiens OX=9606	FKBP11			NaN	NaN	3.063	5	1	17	1	201	22.2	9.39		15.3185	15.9439	13.8985	15.1736	15.1003	15.2665	15.2127	14.3995	15.24	15.5697	14.8254	15.306	15.3682	15.4947	15.2186	12.6728	15.2505	15.2272	15.0951	15.048	15.3958	15.2712	15.4525	15.5217
	0.653542	0.124147	1.08986	High	P42677	40S ribosomal protein S27 OS=Homo sapiens OX=9606	RPS27	+	Cluster -803	5.6237	3.72671e-05	20.584	24	3	515	2	84	9.5	9.45		20.7138	20.4269	20.5156	20.7025	20.6557	20.6705	20.9413	20.1364	20.8363	20.6009	19.9786	20.4375	20.3343	20.3929	20.3976	20.0101	19.9998	20.0283	20.5092	20.5602	20.6141	20.5857	20.5716	20.1922
	0.186756	0.123191	1.08914	High	Q96AG4	Leucine-rich repeat-containing protein 59 OS=Homo sapiens OX=9606	LRRC59	+	Cluster -803	6.01659	4.0404e-05	21.727	29	7	273	7	307	34.9	9.57		18.8981	19.4936	18.7122	19.0797	19.0581	19.3357	19.2117	18.606	18.9256	19.6068	19.3265	19.2673	19.6182	19.661	19.6674	19.5601	19.5346	19.7113	19.461	19.5185	19.4109	19.7438	19.4783	19.1478
	0.26685	0.115536	1.08338	High	P07900	Heat shock protein HSP 90-alpha OS=Homo sapiens OX=9606	HSP90AA1	+	Cluster -803	4.26792	6.83761e-05	64.766	24	14	1000	6	732	84.6	5.02		20.2626	19.9021	19.6704	20.0519	20.0373	20.0926	20.1405	19.3583	19.9075	19.8318	19.5773	19.4408	19.9078	20.0543	20.0015	19.9053	19.8992	19.9259	20.0442	20.0457	20.0919	19.91	20.0068	19.4653
	0.0894996	0.111726	1.08052	High	P0DOY2	Immunoglobulin lambda constant 2 OS=Homo sapiens OX=9606	IGLC2	+	Cluster -801	2.64346	0.00102736	16.49	60	3	48	2	106	11.3	7.24		13.4023	14.8821	14.1164	14.0031	14.3644	14.3686	12.0604	10.843	12.1926	12.5669	12.7985	13.3967	13.4869	13.2	13.1834	13.4935	14.1003	13.0476	13.6276	11.963	13.8078	12.9825	12.3865	12.1753
	0.30869	0.0979156	1.07023	High	Q969Q0	60S ribosomal protein L36a-like OS=Homo sapiens OX=9606	RPL36AL	+	Cluster -800	8.46371	0	11.536	21	2	125	2	106	12.5	10.65		16.6516	16.2568	16.396	16.4276	16.6279	16.5428	16.5673	16.2873	16.7869	16.4528	16.2516	16.5142	16.7727	16.8963	16.7466	17.1301	17.1199	16.9151	18.0945	18.0346	18.2654	16.5249	16.4292	16.3269
	0.0318001	0.0875994	1.0626	High	Q9Y3R4	Sialidase-2 OS=Homo sapiens OX=9606	NEU2	+	Cluster -803	2.47196	0.0015	3.625	3	1	9	1	380	42.2	6.87		13.7232	13.4056	13.1719	12.3751	12.8588	15.3296	12.8662	13.1883	11.8911	14.9849	15.0518	15.0167	14.7419	15.0247	15.0376	14.4946	14.8055	14.822	14.4121	14.5115	14.5063	14.3133	14.3041	12.3336
	0.656114	0.0847537	1.06051	High	P15880	40S ribosomal protein S2 OS=Homo sapiens OX=9606	RPS2	+	Cluster -800	8.67723	0	11.356	11	3	186	3	293	31.3	10.24		17.8275	17.6839	17.8738	17.8578	17.9004	17.8813	17.6533	16.6137	17.4978	17.3858	16.8868	16.9978	17.2405	17.3983	17.3384	17.9372	17.9447	17.999	18.0864	18.1878	18.1084	17.7201	17.5953	17.3442
	0.105356	0.0812085	1.0579	High	P30260	Cell division cycle protein 27 homolog OS=Homo sapiens OX=9606	CDC27	+	Cluster -803	1.82523	0.00641849	27.239	14	8	25	8	824	91.8	7.02		17.5467	17.2628	17.263	17.8066	17.576	16.9335	17.3696	18.5731	18.2569	18.0339	17.0198	16.9738	16.9353	17.7241	17.1397	16.9868	17.1481	16.8523	17.0826	16.5902	16.5624	16.9694	16.4991	16.615
	0.0578807	0.0749324	1.05331	High	MB0012	Proteine BIN1 DM - GFP (echantillon 12)	BIN1-DM	+	Cluster -801	2.05318	0.00372081	817.647	73	61	15586	8	709	78.6	5.6		14.7018	13.6336	14.059	13.5617	14.5527	14.5048	14.5267	13.0307	13.6417	12.7073	12.3894	12.0979	14.116	13.9218	12.7055	13.631	14.1833	13.3925	14.4083	14.2798	14.2217	14.4378	14.1342	13.9963
	0.0385606	0.0730371	1.05193	High	P49589	Cysteine--tRNA ligase, cytoplasmic OS=Homo sapiens OX=9606	CARS1			NaN	NaN	4.199	3	2	11	2	748	85.4	6.76		15.1535	16.6012	14.9333	14.8899	15.9621	16.0552	14.0894	12.8037	15.5856	14.9923	15.4488	14.461	14.6471	15.685	15.0117	14.1636	13.691	14.2766	14.556	14.6284	14.8198	14.5654	14.711	15.5537
	0.0522355	0.0715164	1.05082	High	P27708	CAD protein OS=Homo sapiens OX=9606	CAD	+	Cluster -803	1.91666	0.00509375	10.209	2	4	43	4	2225	242.8	6.46		14.8947	16.0196	16.3434	15.4994	15.895	16.078	16.2196	15.3649	16.1233	16.0938	15.6111	15.4427	16.0128	16.1243	16.2076	15.5347	15.4932	15.6621	15.9914	16.0574	16.013	15.9736	16.1045	16.0533
	0.227304	0.068821	1.04886	High	P78527	DNA-dependent protein kinase catalytic subunit OS=Homo sapiens OX=9606	PRKDC	+	Cluster -803	10.2853	0	75.038	7	23	504	23	4128	468.8	7.12		19.5395	19.6421	19.5418	19.4962	19.5669	19.8667	19.6685	18.8612	19.5346	19.5596	19.2456	19.2948	19.7065	19.8229	19.7676	19.2828	19.1756	19.3097	19.7904	19.7832	19.8008	19.9306	19.9504	19.6004
	0.0310832	0.0613553	1.04345	High	Q99717	Mothers against decapentaplegic homolog 5 OS=Homo sapiens OX=9606	SMAD5			NaN	NaN	2.728	2	1	12	1	465	52.2	7.71		13.7664	15.5655	15.8263	14.8606	15.097	15.3846	14.9865	14.5988	15.0707	15.499	14.8805	14.991	15.1055	15.1017	15.592	14.4858	14.0456	14.4073	14.8174	14.9926	14.708	14.4233	14.3964	15.1685
	0.0505385	0.0505969	1.03569	High	P10412	Histone H1.4 OS=Homo sapiens OX=9606	H1-4			NaN	NaN	31.062	21	5	343	2	219	21.9	11.03	Met-loss+Acetyl [N-Term]	16.4406	15.4549	15.3982	15.9187	15.8196	15.7072	16.1109	14.2802	16.0861	15.6479	15.0021	15.318	15.7819	16.1256	15.6715	16.1545	15.9534	16.1701	16.3402	16.3667	16.474	16.088	15.7759	15.0095
	0.195062	0.0428759	1.03017	High	O14556	Glyceraldehyde-3-phosphate dehydrogenase, testis-specific OS=Homo sapiens OX=9606	GAPDHS	+	Cluster -803	5.79742	3.84615e-05	7.623	4	2	132	2	408	44.5	8.19		20.6867	20.5849	20.3997	20.5896	20.5945	20.6158	20.5374	19.3156	20.4543	20.5671	20.5957	20.3937	20.5808	20.5545	20.6109	20.6018	20.6522	20.6883	20.7606	20.6618	20.6986	20.7124	20.7351	20.2033
	0.0883003	0.0426076	1.02997	High	O94808	Glutamine--fructose-6-phosphate aminotransferase [isomerizing] 2 OS=Homo sapiens OX=9606	GFPT2	+	Cluster -803	6.60665	4.83871e-05	32.164	16	9	256	7	682	76.9	7.37		17.5032	17.7362	18.0327	17.6727	17.7884	17.9388	17.9756	17.4915	18.0072	17.9609	17.7796	17.7984	17.5907	17.6846	17.7022	17.0864	17.1177	17.0808	17.8409	17.9105	18.0424	17.8798	17.8603	17.7421
	0.153872	0.042251	1.02972	High	O60716	Catenin delta-1 OS=Homo sapiens OX=9606	CTNND1	+	Cluster -803	6.08476	4.09556e-05	14.181	5	5	95	5	968	108.1	6.23		17.4844	17.2668	17.3875	17.2661	17.5388	17.4606	17.8856	16.8384	17.6058	17.3578	17.2654	17.0201	17.4588	17.6157	17.6922	16.6324	16.7495	16.5664	17.4167	17.5581	17.5201	17.4607	17.5085	16.7586
	0.0480339	0.0401675	1.02823	High	Q15029	116 kDa U5 small nuclear ribonucleoprotein component OS=Homo sapiens OX=9606	EFTUD2	+	Cluster -800	5.53911	3.64742e-05	7.883	4	3	30	3	972	109.4	5		15.6937	14.889	15.729	15.6399	15.3687	15.4237	16.0912	15.1229	16.3062	15.8316	15.9476	15.6684	16.0236	16.1754	16.1417	16.1681	16.1023	16.2964	16.1593	16.1872	16.3202	16.3383	16.318	16.1187
	0.0442532	0.0392262	1.02756	High	MB0007	Proteine OPML GLY - GFP (echantillon 7)	OPML	+	Cluster -800	12.1032	0	320.818	52	27	11108	3	392	38.6	6.47	Acetyl [N-Term]	13.1403	13.5245	13.0844	13.82	12.9471	13.0997	13.6675	11.9468	14.2783	13.6223	12.6705	12.7504	11.8538	13.5608	13.8869	13.0827	12.9724	12.3567	23.4135	23.3928	23.3911	15.2461	15.1246	14.7926
	0.0353524	0.0367769	1.02582	High	Q9NR28	Diablo IAP-binding mitochondrial protein OS=Homo sapiens OX=9606	DIABLO	+	Cluster -803	3.10732	0.000449587	3.533	4	1	17	1	239	27.1	5.9		13.8061	14.853	14.7582	14.5228	14.3116	14.6932	14.955	14.0268	14.2611	14.7466	14.7078	14.6852	14.3445	14.4963	14.6206	12.7196	13.8413	11.797	14.9956	14.7031	14.7058	14.914	14.9702	14.4008
	0.0200311	0.0332088	1.02329	High	P47897	Glutamine--tRNA ligase OS=Homo sapiens OX=9606	QARS1	+	Cluster -803	2.50486	0.00136484	10.544	6	4	43	4	775	87.7	7.15		14.8096	16.1504	15.3973	15.376	14.8668	16.2142	16.267	15.2294	15.8079	16.0735	15.9168	15.7254	16.1969	16.0194	16.1502	15.6897	15.7873	15.5222	16.245	16.3564	16.4492	16.1309	16.2978	15.3982
	0.101667	0.032999	1.02314	High	Q9HA64	Ketosamine-3-kinase OS=Homo sapiens OX=9606	FN3KRP	+	Cluster -803	8.45768	0	43.994	25	6	267	6	309	34.4	7.33		19.9985	20.0219	20.0119	19.8167	20.1123	20.2022	20.7516	19.7147	20.4958	20.2852	20.143	20.0766	20.2033	20.3953	20.4593	19.1178	19.1777	18.6704	20.4522	20.5273	20.5239	20.1298	20.1223	19.7189
	0.0190688	0.0241632	1.01689	High	P53041	Serine/threonine-protein phosphatase 5 OS=Homo sapiens OX=9606	PPP5C			NaN	NaN	2.594	3	1	4	1	499	56.8	6.28		12.8151	14.0112	14.101	13.7959	13.5294	13.6744	13.6294	13.2418	13.4846	13.6065	12.9107	13.1561	13.9496	13.7026	13.7381	13.2426	13.2409	13.2281	13.5555	13.6283	13.7353	13.5808	13.5393	13.5539
	0.0267727	0.0104675	1.00728	High	P43243	Matrin-3 OS=Homo sapiens OX=9606	MATR3	+	Cluster -800	6.29353	4.33213e-05	10.377	4	3	86	3	847	94.6	6.25		16.2268	16.2941	16.3437	16.0573	16.486	16.3527	16.5308	15.6592	16.7137	16.0343	15.9492	15.5216	16.0383	16.0974	16.1356	17.0356	16.9778	16.871	16.3911	16.3158	16.2246	16.4883	15.9471	15.973
	0.0192803	0.00876204	1.00609	High	P56192	Methionine--tRNA ligase, cytoplasmic OS=Homo sapiens OX=9606	2001-03-01	+	Cluster -803	2.06544	0.00360647	3.938	1	1	21	1	900	101.1	6.16		14.9897	14.6152	15.061	14.9273	14.9854	14.7795	15.0644	14.2775	14.9041	14.8243	14.4412	14.5351	14.8226	15.0075	14.8647	14.6148	14.6176	15.0936	14.802	15.0101	15.253	14.8449	14.6394	14.8696
	0.00808248	0.00731341	1.00508	High	Q96AZ6	Interferon-stimulated gene 20 kDa protein OS=Homo sapiens OX=9606	ISG20	+	Cluster -803	5.84579	3.85852e-05	19.154	26	4	155	4	181	20.4	8.92		18.2627	17.7071	17.3749	17.5629	18.0628	17.7409	17.9204	17.6159	18.4191	18.73	18.2459	18.3293	18.177	18.4642	18.3097	17.1068	17.0666	17.161	18.5938	18.5027	18.5743	18.1724	18.1269	17.8685
	0.00262757	0.00548935	1.00381	High	P58107	Epiplakin OS=Homo sapiens OX=9606	EPPK1			NaN	NaN	134.194	21	26	433	21	5088	555.3	5.62		19.1813	17.3499	16.9994	17.8029	18.0238	17.7203	18.1467	17.7547	17.7023	17.3311	17.1033	17.5753	17.8148	17.7701	17.7541	17.2378	17.4648	17.0188	17.8664	17.8356	17.3111	17.8093	17.4612	16.9984
	0.00150642	0.0033385	1.00232	High	P51153	Ras-related protein Rab-13 OS=Homo sapiens OX=9606	RAB13			NaN	NaN	7.419	12	2	91	1	203	22.8	9.19		13.3674	13.5577	13.8928	13.1456	12.685	14.9973	15.3877	11.6349	15.1147	14.9574	14.4162	14.4953	15.0606	15.3365	12.6856	12.6391	12.6511	12.6308	15.0935	15.1461	15.1117	15.1577	15.2721	14.7992
	0.000396314	-0.000110626	0.999923	High	P17812	CTP synthase 1 OS=Homo sapiens OX=9606	CTPS1	+	Cluster -803	4.19024	9.16667e-05	28.138	15	7	317	7	591	66.6	6.46		18.9126	19.158	19.1389	19.0211	19.1604	19.0276	19.4625	18.3333	19.1898	19.2039	18.9855	19.0763	19.0432	19.2135	18.768	18.3521	18.4913	18.4933	19.0912	18.6654	18.7077	18.8464	19.241	18.6782
	0.000359199	-0.000314077	0.999782	High	Q99836	Myeloid differentiation primary response protein MyD88 OS=Homo sapiens OX=9606	MYD88			NaN	NaN	34.839	31	7	252	7	296	33.2	6.15		19.2098	19.0331	19.2457	18.6126	19.3758	19.4992	20.0113	18.5649	18.9605	19.1296	19.0119	19.3838	18.8552	19.7543	19.0163	18.1455	18.4285	19.176	19.101	19.156	19.0496	19.2694	19.8084	18.6844
	0.00138523	-0.00250785	0.998263	High	P53621	Coatomer subunit alpha OS=Homo sapiens OX=9606	COPA			NaN	NaN	4.96	2	2	6	2	1224	138.3	7.66		16.114	15.5796	14.151	15.3362	15.1319	15.369	15.3745	13.3625	15.3624	15.1882	14.6842	14.9735	15.5755	15.7043	15.6424	15.6657	15.3888	15.5488	15.7788	15.7642	15.7947	15.6579	15.4743	13.9625
	0.0239195	-0.00559839	0.996127	High	Q92974	Rho guanine nucleotide exchange factor 2 OS=Homo sapiens OX=9606	ARHGEF2	+	Cluster -803	5.92427	3.92157e-05	5.529	2	2	24	2	986	111.5	7.27		15.6322	15.4337	15.3905	15.4327	15.4935	15.5134	15.9324	15.1371	15.9362	15.6301	15.6578	15.5995	15.6495	15.8897	15.7982	15.2206	14.4275	14.5752	15.7235	15.7239	15.7397	15.6905	15.7821	15.4471
	0.0568352	-0.0081164	0.99439	High	P08865	40S ribosomal protein SA OS=Homo sapiens OX=9606	RPSA	+	Cluster -800	3.45081	0.000311504	26.707	25	5	259	5	295	32.8	4.87		19.1897	19.1931	19.0884	19.1001	19.1288	19.2178	19.2871	18.1326	19.0086	19.0854	18.4589	18.4569	18.8582	18.7531	18.7873	19.0077	19.0063	19.067	19.1615	19.0148	19.0197	19.0215	18.9408	18.3329
	0.0194234	-0.00818507	0.994343	High	P22061	Protein-L-isoaspartate(D-aspartate) O-methyltransferase OS=Homo sapiens OX=9606	PCMT1	+	Cluster -803	6.26864	4.28571e-05	21.82	18	5	214	5	227	24.6	7.21		19.1925	19.0315	18.9226	18.8081	19.1542	19.1598	18.9967	18.2957	19.0637	18.789	18.4377	18.3379	18.6728	18.7675	18.6953	18.1369	18.1546	18.2252	18.5507	18.6467	18.7956	18.7754	18.7672	18.5077
	0.0389725	-0.0133785	0.99077	High	Q9UL25	Ras-related protein Rab-21 OS=Homo sapiens OX=9606	RAB21	+	Cluster -803	4.18821	9.14761e-05	3.338	4	1	24	1	225	24.3	7.94		15.3704	15.2323	14.9817	15.2323	15.1551	15.1569	14.9192	13.9257	14.9387	15.0951	14.6077	14.7073	15.0188	15.0983	14.9794	14.5571	14.1493	14.3006	15.1057	15.2405	15.1572	15.066	14.6829	14.8086
	0.0518618	-0.0157496	0.989143	High	Q9C0C9	(E3-independent) E2 ubiquitin-conjugating enzyme OS=Homo sapiens OX=9606	UBE2O	+	Cluster -803	5.33319	4.65116e-05	15.973	7	5	21	5	1292	141.2	5.12		20.796	21.0613	20.7203	20.8339	20.8723	20.824	20.8756	20.1018	20.6707	20.654	20.6082	20.5697	20.731	20.8317	20.8508	20.7886	20.788	20.8429	20.858	20.8512	20.9412	20.5856	20.6887	20.4852
	0.0859002	-0.0168463	0.988391	High	P09651	Heterogeneous nuclear ribonucleoprotein A1 OS=Homo sapiens OX=9606	HNRNPA1	+	Cluster -801	10.5782	0	22.726	16	5	191	4	372	38.7	9.13		19.3215	19.2419	19.1379	19.1795	19.165	19.3062	18.4989	17.518	18.2795	18.3313	18.1661	17.978	18.3065	18.385	18.4077	18.6199	18.5723	18.584	18.4662	18.5343	18.4844	18.5346	18.4667	18.2183
	0.00584912	-0.0182225	0.987449	High	P57721	Poly(rC)-binding protein 3 OS=Homo sapiens OX=9606	PCBP3	+	Cluster -803	2.81131	0.000727273	25.138	15	4	322	1	371	39.4	8.07		12.7022	12.6402	14.5387	12.0339	12.9956	14.7968	15.3309	14.8986	15.2121	14.873	14.3387	14.1589	14.6269	14.7676	14.7047	14.1048	13.7694	13.9508	14.7555	14.7939	14.7637	14.7668	14.8093	14.4814
	0.175471	-0.0213604	0.985303	High	P33176	Kinesin-1 heavy chain OS=Homo sapiens OX=9606	KIF5B	+	Cluster -803	6.90644	5.17241e-05	36.309	14	11	213	11	963	109.6	6.51	Met-loss+Acetyl [N-Term]	18.4782	18.3611	18.3616	18.3326	18.3869	18.4173	18.7533	17.943	18.4419	18.3119	18.0586	17.9862	18.0749	18.3454	18.3354	17.9208	17.8362	17.8535	18.2054	18.298	18.3868	18.4828	18.3874	18.1458
	0.0852908	-0.0252361	0.98266	High	P22090	40S ribosomal protein S4, Y isoform 1 OS=Homo sapiens OX=9606	RPS4Y1	+	Cluster -803	4.92977	5.15464e-05	34.15	22	7	307	1	263	29.4	10.24		20.796	21.0613	20.7203	20.8238	20.8682	20.8099	20.8614	20.1018	20.6656	20.637	20.5963	20.5563	20.7217	20.8151	20.8382	20.59	20.6032	20.6462	20.85	20.8353	20.9218	20.5737	20.675	20.4702
	0.081684	-0.0259787	0.982154	High	P33316	Deoxyuridine 5'-triphosphate nucleotidohydrolase, mitochondrial OS=Homo sapiens OX=9606	DUT	+	Cluster -803	3.80833	0.00015444	2.774	3	1	23	1	252	26.5	9.36		18.5746	18.319	18.1943	18.3496	18.3439	18.3165	18.5706	17.5206	18.4853	18.1975	17.7934	17.633	18.3286	18.4064	18.4545	17.9864	17.8834	17.6935	18.4976	18.4337	18.4474	18.3038	18.2963	17.6394
	0.284241	-0.0276814	0.980996	High	Q9Y490	Talin-1 OS=Homo sapiens OX=9606	TLN1	+	Cluster -803	8.8219	0	20.893	4	8	86	8	2541	269.6	6.07		17.9096	17.8326	17.8831	17.8874	17.8709	17.7839	18.6047	17.6633	18.4407	17.5374	17.3253	17.2656	17.6033	17.6569	17.6938	17.1529	17.1803	17.355	17.3203	17.3723	17.4601	17.5554	17.158	16.8408
	0.148639	-0.0311235	0.978658	High	P63208	S-phase kinase-associated protein 1 OS=Homo sapiens OX=9606	SKP1	+	Cluster -803	3.25388	0.000410084	6.034	7	1	50	1	163	18.6	4.54		17.4458	17.2684	17.2855	17.21	17.3961	17.3001	17.4781	16.5835	17.2355	17.2025	16.6526	16.9554	17.1566	17.2521	17.1194	17.0395	17.0229	17.3683	17.1684	17.3925	17.2688	17.4412	17.3397	16.8905
	0.0833714	-0.0321776	0.977943	High	P17066	Heat shock 70 kDa protein 6 OS=Homo sapiens OX=9606	HSPA6	+	Cluster -800	11.7812	0	38.967	17	9	1058	4	643	71	6.14		17.2642	17.0655	17.5045	17.1695	17.2269	17.3414	16.9769	16.0668	17.1603	16.3325	16.2804	16.0449	16.7642	16.8969	16.836	18.2716	18.2853	18.1387	18.8496	18.9432	18.8803	16.715	16.7986	16.726
	0.220246	-0.0349604	0.976059	High	P17858	ATP-dependent 6-phosphofructokinase, liver type OS=Homo sapiens OX=9606	PFKL			NaN	NaN	12.761	7	5	47	5	780	85	7.5		17.0421	17.1069	17.2466	17.0929	17.0756	17.1222	17.2587	17.4628	17.3059	15.4222	16.6031	15.178	16.8278	23.2737	15.7042	16.2808	16.2533	16.4919	15.2329	16.6333	16.6963	15.7789	15.5011	17.0777
	0.117756	-0.0359488	0.97539	High	Q9BZG1	Ras-related protein Rab-34 OS=Homo sapiens OX=9606	RAB34	+	Cluster -803	7.27206	5.60748e-05	8.567	9	2	33	2	259	29	7.88		16.1352	16.358	15.982	16.1462	16.1398	16.0813	16.4637	15.7736	16.2526	15.9674	15.7842	15.8743	16.1576	16.4301	16.2778	15.2993	15.3674	15.4127	16.3424	16.1928	16.148	16.435	16.3892	16.1681
	0.218084	-0.0391229	0.973246	High	Q9NZT1	Calmodulin-like protein 5 OS=Homo sapiens OX=9606	CALML5	+	Cluster -801	11.2784	0	62.333	64	8	297	8	146	15.9	4.44	Met-loss+Acetyl [N-Term]	19.5863	19.453	19.5309	19.411	19.4427	19.5991	18.2541	17.1773	18.1733	17.2789	16.9836	16.9412	16.8621	17.1844	17.1466	17.5033	17.6393	17.6478	17.4618	17.5577	17.4502	17.4041	17.4432	16.5094
	0.0971808	-0.0391286	0.973243	High	P14866	Heterogeneous nuclear ribonucleoprotein L OS=Homo sapiens OX=9606	HNRNPL	+	Cluster -803	4.629	6.65083e-05	21.131	10	4	138	4	589	64.1	8.22		17.6381	18.0624	18.0085	17.8484	17.7777	17.9655	17.8765	16.6053	17.6969	17.7021	17.302	17.1814	17.8086	17.8134	17.799	18.0331	17.8913	17.8751	17.7207	17.8054	17.6946	18.0261	18.0626	17.7075
	0.0700493	-0.0402362	0.972496	High	P16949	Stathmin OS=Homo sapiens OX=9606	STMN1	+	Cluster -803	2.02743	0.00393076	10.298	26	4	81	4	149	17.3	5.97		16.9225	17.5368	17.4998	17.226	17.2901	17.3224	17.4705	15.9211	16.3862	17.3309	17.2478	17.285	17.4098	17.3502	17.4347	17.4633	17.4633	17.5827	17.735	17.5376	17.279	17.5568	16.1663	16.3976
	0.183604	-0.0404078	0.97238	High	Q9UL46	Proteasome activator complex subunit 2 OS=Homo sapiens OX=9606	PSME2	+	Cluster -800	8.55261	0	12.226	9	3	157	3	239	27.4	5.73		22.001	21.7405	21.7679	21.812	21.7672	21.8089	21.6783	20.5705	21.569	21.9435	21.4616	21.5545	21.8058	21.9647	21.914	22.3817	22.3628	22.4518	22.0672	22.0388	22.0697	22.3562	22.2949	21.8023
	0.0942148	-0.0411399	0.971887	High	Q8N1F7	Nuclear pore complex protein Nup93 OS=Homo sapiens OX=9606	NUP93	+	Cluster -800	5.78863	3.80952e-05	4.021	3	2	9	2	819	93.4	5.72		15.274	15.7496	15.5063	15.3491	15.4535	15.6039	15.5706	14.6963	14.7368	15.483	15.1904	15.2139	15.6637	15.7083	15.4652	16.3553	16.4849	16.5478	15.4128	15.5698	15.4571	15.7385	15.4818	15.0297
	0.241681	-0.0424404	0.971011	High	P10398	Serine/threonine-protein kinase A-Raf OS=Homo sapiens OX=9606	ARAF	+	Cluster -803	8.62149	0	5.578	3	2	16	2	606	67.5	9.01		21.0738	20.8934	21.0072	20.8661	20.9602	21.0209	21.3203	20.4008	21.243	21.042	21.057	21.075	21.1129	21.2542	21.2223	20.8562	20.8725	20.9147	21.2594	21.1985	21.2062	21.2925	21.2997	21.0255
	0.162278	-0.0495062	0.966267	High	Q6UN15	Pre-mRNA 3'-end-processing factor FIP1 OS=Homo sapiens OX=9606	FIP1L1			NaN	NaN	9.567	7	2	44	2	594	66.5	5.59		15.712	15.4141	15.6282	15.4559	15.6805	15.4694	17.6903	14.9131	15.7578	15.2742	16.8068	14.7621	15.4075	17.4885	17.203	15.5349	17.0876	15.9048	17.2868	15.5383	15.4958	16.8364	16.7705	15.5933
	0.119823	-0.0498772	0.966019	High	Q14247	Src substrate cortactin OS=Homo sapiens OX=9606	CTTN	+	Cluster -803	5.76261	3.78549e-05	30.08	15	8	205	8	550	61.5	5.4		18.8433	18.4837	18.9474	18.6015	18.7249	18.7985	19.2307	18.7291	18.9395	18.8639	18.4939	18.5677	18.6897	18.7154	18.656	18.2082	18.1259	18.2137	18.7503	18.8669	18.8503	19.0819	19.1035	18.8206
	0.248527	-0.052962	0.963955	High	P09913	Interferon-induced protein with tetratricopeptide repeats 2 OS=Homo sapiens OX=9606	IFIT2	+	Cluster -803	6.74765	5e-05	43.584	21	10	411	10	472	54.6	6.76		20.1396	20.1426	20.3781	20.1961	20.1973	20.1079	20.0687	19.1731	19.8554	20.104	19.8709	19.9105	19.9669	20.1597	20.0853	19.6783	19.5344	19.638	20.0719	20.1338	20.2119	19.7719	19.7791	19.3763
	0.141582	-0.0593255	0.959713	High	O75569	Interferon-inducible double-stranded RNA-dependent protein kinase activator A OS=Homo sapiens OX=9606	PRKRA	+	Cluster -803	3.79871	0.000161228	4.442	8	2	4	2	313	34.4	8.41		19.5395	19.0337	19.4432	19.2888	19.2644	19.2852	19.1934	17.8351	18.9792	19.0794	19.1039	19.0615	19.0209	19.0799	19.0527	19.3245	19.2949	19.4439	19.2298	19.1564	19.1082	19.0532	19.064	18.6813
	0.149742	-0.0602617	0.95909	High	P55854	Small ubiquitin-related modifier 3 OS=Homo sapiens OX=9606	SUMO3	+	Cluster -803	2.04039	0.00385542	4.602	12	1	16	1	103	11.6	5.49		16.1164	15.683	15.6971	15.6788	15.8365	15.8005	15.677	14.5752	15.6126	15.6262	14.8111	14.883	15.5287	15.558	15.7027	15.4896	15.61	15.7791	15.5616	15.5301	15.4696	15.4854	15.6014	14.9072
	0.0911636	-0.0628913	0.957344	High	P60510	Serine/threonine-protein phosphatase 4 catalytic subunit OS=Homo sapiens OX=9606	PPP4C			NaN	NaN	13.334	8	2	89	1	307	35.1	5.06		16.0555	15.2159	15.5649	15.5352	15.4998	15.6127	15.7332	14.2556	15.0206	15.2888	14.3362	14.8536	15.205	15.487	15.6306	14.9542	14.8	14.5666	15.5071	15.0599	15.3599	15.4669	15.4492	14.6743
	0.0916851	-0.0648244	0.956062	High	O75083	WD repeat-containing protein 1 OS=Homo sapiens OX=9606	WDR1	+	Cluster -803	1.82309	0.00644302	10.75	10	4	18	4	606	66.2	6.65		15.6607	16.1553	16.4372	16.0689	15.8101	16.1797	15.7814	14.4752	15.5215	15.7454	15.6795	15.6468	15.9066	16.0722	16.0421	15.5282	15.8914	15.8601	16.091	16.0527	16.1049	15.9314	15.8687	14.7777
	0.085523	-0.0650899	0.955886	High	Q09028	Histone-binding protein RBBP4 OS=Homo sapiens OX=9606	RBBP4	+	Cluster -803	2.21621	0.00255201	10.094	8	3	34	1	425	47.6	4.89		14.4446	14.0716	13.789	14.3652	13.701	14.0438	13.6961	12.6817	13.4954	13.5663	13.1846	13.2394	13.744	13.796	13.8019	13.9005	13.7911	13.8352	13.8556	13.8497	13.5376	14.0088	13.9358	13.4381
	0.673815	-0.0685202	0.953616	High	P27361	Mitogen-activated protein kinase 3 OS=Homo sapiens OX=9606	MAPK3	+	Cluster -803	7.44145	3.90244e-05	18.467	14	5	339	3	379	43.1	6.74		17.7671	17.6333	17.7302	17.5953	17.6619	17.6678	17.8595	17.1283	17.6495	17.5402	17.1909	17.1922	17.5702	17.7118	17.6259	17.2918	17.1313	17.2484	17.7909	17.7931	17.7773	17.7135	17.6619	17.2828
	0.131148	-0.0728426	0.950763	High	Q96N67	Dedicator of cytokinesis protein 7 OS=Homo sapiens OX=9606	DOCK7			NaN	NaN	2.882	1	1	5	1	2140	242.4	6.8		14.0435	13.6778	13.452	13.4378	13.7166	13.8003	13.7366	12.4895	13.711	13.4835	11.5528	13.5345	13.3391	13.4506	13.3891	13.2241	13.2493	13.2758	13.3387	13.3274	13.4214	13.5477	13.5032	13.6416
	0.132333	-0.0730413	0.950632	High	P43490	Nicotinamide phosphoribosyltransferase OS=Homo sapiens OX=9606	NAMPT	+	Cluster -803	3.39988	0.000348432	20.08	13	5	89	5	491	55.5	7.15		18.9787	18.2835	18.6735	18.5654	18.5273	18.6238	18.1415	17.5375	18.1148	18.4507	18.0761	18.0522	18.3426	18.4405	18.4888	18.3882	18.3634	18.547	18.2442	18.2931	18.3922	18.2203	18.2951	17.9308
	0.0649752	-0.0783472	0.947142	High	Q9Y2S7	Polymerase delta-interacting protein 2 OS=Homo sapiens OX=9606	POLDIP2	+	Cluster -800	3.39406	0.000347222	2.886	3	1	3	1	368	42	8.63		13.0628	12.5518	13.7877	13.1644	12.635	13.3678	13.0752	13.0263	14.1402	13.5573	13.1626	12.0525	13.3595	12.0562	12.2979	15.2993	15.2953	15.3228	12.0098	12.5836	13.9331	12.2407	12.9639	11.8404
	0.108578	-0.0824741	0.944437	High	P62310	U6 snRNA-associated Sm-like protein LSm3 OS=Homo sapiens OX=9606	LSM3	+	Cluster -800	2.03575	0.00386115	2.6	12	1	4	1	102	11.8	4.7		14.1565	14.2411	13.3818	13.834	13.8077	13.8903	14.3108	12.8715	14.1558	13.8036	12.753	12.6031	13.9691	14.0126	13.9721	14.2845	14.0916	13.9555	14.3154	14.1288	14.1222	14.3079	13.8375	13.6418
	0.204948	-0.086256	0.941964	High	P62701	40S ribosomal protein S4, X isoform OS=Homo sapiens OX=9606	RPS4X	+	Cluster -800	6.43106	4.5977e-05	53.654	43	12	491	6	263	29.6	10.15		18.8323	18.7044	19.0809	18.5621	18.8279	18.9688	19.1396	18.5771	19.2406	18.7358	18.543	18.6942	18.6746	18.7199	18.7061	18.8695	19.0625	19.2363	19.8816	19.5539	19.6923	18.9864	18.8535	18.7828
	0.228794	-0.0865005	0.941804	High	P60891	Ribose-phosphate pyrophosphokinase 1 OS=Homo sapiens OX=9606	PRPS1	+	Cluster -803	1.82962	0.00632905	4.505	4	1	41	1	318	34.8	6.98		15.4231	15.2323	15.2291	14.9676	15.2287	15.4286	15.2313	14.3159	14.8657	14.8436	14.8415	14.9806	15.0931	15.1863	14.8907	14.0986	14.3177	14.6094	15.2246	14.1326	15.036	15.2931	15.0522	14.6005
	0.292621	-0.089414	0.939904	High	P27348	14-3-3 protein theta OS=Homo sapiens OX=9606	YWHAQ	+	Cluster -800	12.3685	0	56.321	50	11	428	9	245	27.7	4.78	Acetyl [N-Term]	18.3612	18.1397	18.499	18.136	18.3634	18.2323	18.2876	16.9133	18.2317	17.9099	17.5215	17.798	18.1866	18.1269	18.0386	21.052	21.0088	21.0503	18.2092	18.186	18.2023	18.2378	18.0533	17.6512
	0.102367	-0.0900052	0.939519	High	Q9Y6C9	Mitochondrial carrier homolog 2 OS=Homo sapiens OX=9606	MTCH2			NaN	NaN	15.355	25	5	56	5	303	33.3	7.97		18.6907	18.6699	17.789	18.4888	18.1165	18.2743	18.6942	17.8417	18.4879	17.6606	17.8801	17.9539	18.4365	18.1173	18.3554	17.6429	18.3886	18.4636	18.3019	18.3803	17.921	18.6321	18.4426	18.0368
	0.769151	-0.0908521	0.938968	High	Q9BRX2	Protein pelota homolog OS=Homo sapiens OX=9606	PELO	+	Cluster -803	8.19125	0	26.814	14	5	170	5	385	43.3	6.34		18.3463	18.1891	18.3526	18.1855	18.2149	18.215	18.5662	17.9399	18.5033	18.3747	17.7775	17.9185	18.1322	18.0955	18.2146	17.2869	17.3588	17.3273	18.3562	18.3617	18.4088	18.3433	18.1359	17.9102
	0.0389903	-0.0923694	0.937981	High	P19623	Spermidine synthase OS=Homo sapiens OX=9606	SRM			NaN	NaN	4.892	8	2	31	2	302	33.8	5.49		13.4506	15.7127	15.9432	14.9255	14.7405	15.1634	15.5348	14.881	15.29	15.1355	14.4924	14.7185	15.2813	15.5878	15.2598	15.055	14.9034	14.9878	15.5052	15.5576	15.4429	15.4226	15.4657	15.0082
	0.444603	-0.0997709	0.933181	High	P49915	GMP synthase [glutamine-hydrolyzing] OS=Homo sapiens OX=9606	GMPS	+	Cluster -803	3.95905	0.00012	10.929	7	4	104	4	693	76.7	6.87		17.3732	17.6027	17.6229	17.5135	17.3313	17.4548	17.4705	16.761	17.4605	17.3618	16.9539	16.8804	17.2341	17.3359	17.0598	17.1462	17.3186	17.19	17.3283	17.3199	17.3662	17.5252	17.5052	17.2131
	0.0958814	-0.101094	0.932326	High	Q8TD19	Serine/threonine-protein kinase Nek9 OS=Homo sapiens OX=9606	NEK9			NaN	NaN	19.304	6	5	124	5	979	107.1	5.74		17.0927	17.3998	16.4599	16.8818	16.4399	17.3274	16.748	16.0746	17.1044	16.7777	16.7997	16.6406	17.0993	16.8059	17.2205	16.5051	16.4393	16.7497	17.2934	16.6583	16.7555	17.3374	16.7337	16.9362
	0.338332	-0.103804	0.930576	High	P40429	60S ribosomal protein L13a OS=Homo sapiens OX=9606	RPL13A	+	Cluster -800	6.99153	5.26316e-05	19.974	20	4	202	4	203	23.6	10.93		18.0965	17.7257	17.8638	17.6998	17.7551	17.9197	17.7148	15.8763	17.3303	16.9882	16.4858	16.8269	17.3103	17.4052	17.3841	17.485	17.4712	17.4499	19.2092	19.1912	19.2077	17.7293	17.5704	17.2061
	0.0607049	-0.107148	0.928422	High	P35326	Small proline-rich protein 2A OS=Homo sapiens OX=9606	SPRR2A			NaN	NaN	23.746	79	4	201	1	72	8	8.43		13.9798	12.5326	14.4446	13.1378	13.8213	13.6765	13.5663	12.8614	13.5363	12.0272	12.2594	12.5388	12.8967	12.2005	13.0691	12.6314	13.8598	13.0654	12.0628	12.3151	12.0803	13.4967	12.851	11.675
	0.704884	-0.108455	0.927581	High	P46781	40S ribosomal protein S9 OS=Homo sapiens OX=9606	RPS9	+	Cluster -800	9.17254	0	17.721	25	6	419	6	194	22.6	10.65		20.1822	20.1388	20.3567	20.1286	20.1492	20.0745	19.9826	18.9582	19.8758	19.762	19.6811	19.6681	19.7458	19.8586	19.8023	20.3314	20.3466	20.3708	20.7358	20.6943	20.7185	19.8854	19.9108	19.4745
	0.0998399	-0.108576	0.927503	High	Q06210	Glutamine--fructose-6-phosphate aminotransferase [isomerizing] 1 OS=Homo sapiens OX=9606	GFPT1	+	Cluster -803	2.7796	0.000773791	33.944	18	10	228	8	699	78.8	7.11		17.2133	18.3792	18.3761	17.8085	17.8853	17.9491	18.2488	17.8014	18.1969	18.2064	17.9447	17.845	17.8242	17.9316	17.827	17.2838	17.2076	17.397	18.0493	18.0531	18.0901	18.1513	18.0892	17.9583
	0.0529502	-0.108775	0.927375	High	A6NHR9	Structural maintenance of chromosomes flexible hinge domain-containing protein 1 OS=Homo sapiens OX=9606	SMCHD1	+	Cluster -800	2.29327	0.0021983	105.244	16	23	146	23	2005	226.2	7.3	Met-loss+Acetyl [N-Term]	15.9602	14.3367	16.487	15.9438	14.9617	15.5521	16.0435	14.6968	14.5392	14.4748	16.2208	15.1704	16.5865	16.474	16.0095	17.8334	17.7048	17.8162	17.3016	17.013	15.8489	17.3006	15.3994	16.1745
	0.256967	-0.111361	0.925715	High	P18621	60S ribosomal protein L17 OS=Homo sapiens OX=9606	RPL17	+	Cluster -800	8.95499	0	18.844	22	4	299	4	184	21.4	10.17		18.7375	18.2556	18.2234	18.2699	18.2305	18.382	18.4401	18.0091	18.6867	18.2804	17.8326	17.9354	18.3144	18.31	18.2788	18.8348	18.8373	18.8314	19.9301	19.9608	20.01	18.3664	18.2865	18.2681
	0.184764	-0.113921	0.924073	High	Q12906	Interleukin enhancer-binding factor 3 OS=Homo sapiens OX=9606	ILF3	+	Cluster -800	7.38001	5.76923e-05	18.202	6	5	100	5	894	95.3	8.76		16.8757	16.2263	16.2681	16.2243	16.2493	16.5548	16.95	16.5829	16.7092	16.1592	15.9855	16.2324	16.3196	16.6221	16.7003	17.6081	17.5042	17.557	17.937	17.8923	17.9083	17.231	16.9696	16.9611
	0.0930914	-0.113981	0.924035	High	P62841	40S ribosomal protein S15 OS=Homo sapiens OX=9606	RPS15	+	Cluster -800	3.63798	0.00019963	2.792	8	1	8	1	145	17	10.39		15.3203	15.2111	14.5518	15.2871	15.2705	14.1837	14.4494	15.2857	16.1527	12.8231	11.8133	13.6694	14.1696	14.4432	15.0461	17.1381	16.1995	16.5907	15.5278	16.3994	16.3001	15.1445	15.1601	15.8635
	0.496722	-0.115814	0.922862	High	Q96CX2	BTB/POZ domain-containing protein KCTD12 OS=Homo sapiens OX=9606	KCTD12	+	Cluster -803	3.37951	0.000344828	20.579	17	5	205	5	325	35.7	5.64		18.662	18.9788	18.8337	18.6364	18.7012	18.7895	19.0837	17.8286	18.568	18.6639	18.0159	18.2158	18.7852	19.1584	18.9801	18.8079	18.6384	18.6769	18.8309	18.933	18.9111	18.9065	18.7257	18.6425
	0.563506	-0.11659	0.922365	High	P53367	Arfaptin-1 OS=Homo sapiens OX=9606	ARFIP1	+	Cluster -803	2.98032	0.000515298	4.414	3	1	33	1	373	41.7	6.7		15.2385	15.1655	15.4017	15.2647	15.1295	15.0617	15.3799	14.9933	15.3371	15.0238	15.1118	15.0665	14.7806	15.2536	15.0026	14.9047	14.6532	14.8386	14.7407	14.8969	15.1629	15.1608	15.3016	15.1138
	1.2504	-0.116666	0.922317	High	Q15582	Transforming growth factor-beta-induced protein ig-h3 OS=Homo sapiens OX=9606	TGFBI	+	Cluster -803	5.36587	4.69208e-05	53.603	25	11	332	11	683	74.6	7.71		19.5737	19.522	19.4976	19.4442	19.4594	19.3397	19.8136	19.4127	19.5321	19.4816	19.3562	19.2018	19.8132	20.0706	19.9375	19.0337	18.8657	18.975	19.4863	19.4188	19.5282	19.6654	19.8869	19.8467
	0.301429	-0.117376	0.921863	High	P18085	ADP-ribosylation factor 4 OS=Homo sapiens OX=9606	ARF4			NaN	NaN	17.431	26	4	136	2	180	20.5	7.14		16.9496	17.4593	17.0388	16.9939	17.0506	17.0511	17.146	15.9156	16.9413	17.2798	16.2113	16.8615	17.1662	17.241	16.6157	16.5371	16.5446	16.584	17.2354	16.698	17.1955	17.2248	17.0899	16.1482
	0.975459	-0.120478	0.919883	High	O00469	Procollagen-lysine,2-oxoglutarate 5-dioxygenase 2 OS=Homo sapiens OX=9606	PLOD2	+	Cluster -803	8.21339	0	43.268	16	9	383	9	737	84.6	6.71		19.8144	19.6769	19.6636	19.5373	19.61	19.6463	19.7279	19.042	19.7402	19.399	19.0645	19.0713	19.6595	19.7624	19.7589	19.1194	19.1112	19.1748	19.6335	19.6891	19.6783	19.6044	19.4979	19.3855
	0.972791	-0.124769	0.917151	High	Q9H1K4	Mitochondrial glutamate carrier 2 OS=Homo sapiens OX=9606	SLC25A18	+	Cluster -803	9.39609	0	5.51	7	2	38	2	315	33.8	9.25		15.943	16.0128	16.145	15.9183	15.8886	15.9196	16.4896	15.7757	16.2972	15.9525	15.8957	15.5861	15.95	16.0561	16.0122	15.2344	15.0863	15.195	16.0181	16.0145	16.1026	16.1879	16.3057	16.0101
	0.6182	-0.134185	0.911184	High	MB0006	Proteine RIL45 GLY - GFP (echantillon 6)	RIL45	+	Cluster -800	21.5785	0	476.235	44	37	11468	13	762	76.2	10.92		19.0144	19.1783	19.336	19.0049	19.0201	19.1011	19.0884	18.2261	18.8226	18.8366	18.9581	19.0291	18.8607	18.9438	18.9637	26.8703	26.7994	26.8648	19.1736	19.0801	19.0979	18.8889	18.8109	18.4897
	1.37502	-0.135359	0.910443	High	Q5QNW6	Histone H2B type 2-F OS=Homo sapiens OX=9606	H2BC18	+	Cluster -800	13.572	0	14.019	23	3	155	1	126	13.9	10.32		16.9074	16.9054	17.0131	16.7639	16.8622	16.7937	17.7051	16.9693	17.6092	16.3034	16.0657	16.1665	16.8814	16.9684	16.9368	17.6773	17.673	17.7709	16.9897	16.895	16.9119	17.3828	17.35	16.9101
	0.218303	-0.135685	0.910238	High	Q16658	Fascin OS=Homo sapiens OX=9606	FSCN1	+	Cluster -801	2.07875	0.00352909	4.813	4	2	23	2	493	54.5	7.24		17.9361	17.4598	17.2588	17.5279	17.1471	17.5727	16.6187	16.9952	16.8482	16.4491	15.6895	15.8534	16.8613	16.5221	16.5192	16.6619	16.0518	17.014	16.8248	16.8379	16.8191	17.5674	17.313	16.9787
	0.42439	-0.13629	0.909856	High	Q15746	Myosin light chain kinase, smooth muscle OS=Homo sapiens OX=9606	MYLK	+	Cluster -803	6.38189	4.49438e-05	5.21	1	2	32	2	1914	210.6	6.15		15.5095	15.2634	15.5597	15.1039	15.4093	15.4106	15.9095	14.9892	15.7664	15.2688	15.2097	14.9562	15.1964	15.456	15.442	14.7336	14.5867	14.8804	15.537	15.6373	15.6268	15.3205	15.469	15.0203
	0.279957	-0.136423	0.909772	High	Q9BYK8	Helicase with zinc finger domain 2 OS=Homo sapiens OX=9606	HELZ2	+	Cluster -803	5.11293	4.3956e-05	18.206	3	7	80	7	2649	294.5	7.49		16.7783	17.1289	17.3905	16.8472	16.9158	17.1253	17.273	16.7539	17.47	17.0671	17.2202	17.23	17.0892	17.1545	17.0806	16.2831	16.2688	16.6135	17.3784	17.4187	17.4513	17.1657	17.2803	17.1548
	1.48079	-0.142749	0.905791	High	P42766	60S ribosomal protein L35 OS=Homo sapiens OX=9606	RPL35	+	Cluster -800	12.5936	0	9.385	15	2	170	2	123	14.5	11.05		18.084	17.9967	18.0799	17.8659	17.888	17.9785	17.8768	16.9566	17.7742	17.4369	17.0476	17.0599	17.5396	17.6842	17.7132	17.9338	17.8229	17.9078	19.1937	19.2393	19.2038	17.6342	17.2459	17.1822
	0.324293	-0.144077	0.904958	High	P35914	Hydroxymethylglutaryl-CoA lyase, mitochondrial OS=Homo sapiens OX=9606	HMGCL	+	Cluster -803	1.74235	0.00791909	3.962	3	1	23	1	325	34.3	8.54		15.7793	15.1731	15.329	15.2815	15.312	15.2557	15.5876	14.5564	15.25	15.081	14.6729	15.1912	15.2722	15.2847	15.1507	14.8469	14.8227	14.7093	15.1636	15.1682	15.3007	15.4001	15.2859	14.8087
	0.979151	-0.145613	0.903995	High	Q8N0X7	Spartin OS=Homo sapiens OX=9606	SPART			NaN	NaN	2.91	2	1	5	1	666	72.8	5.91		13.307	13.4172	13.4701	13.3532	13.2086	13.1957	13.7215	12.9885	13.9714	13.686	13.3039	13.343	13.0553	13.3437	13.241	14.2264	12.5981	14.4417	13.1282	13.4109	13.7804	13.1949	13.6127	13.6726
	0.263144	-0.146449	0.903471	High	O60884	DnaJ homolog subfamily A member 2 OS=Homo sapiens OX=9606	DNAJA2	+	Cluster -803	3.75326	0.000159393	6.744	6	2	54	2	412	45.7	6.48		15.9269	16.6296	16.2859	15.9539	16.2263	16.2229	16.5372	15.5116	16.3102	16.2608	16.1732	16.2619	16.4362	16.3381	16.6247	16.2925	16.3923	16.582	16.8913	16.7095	16.6756	16.6631	16.7441	15.9119
	1.13214	-0.146812	0.903244	High	P17987	T-complex protein 1 subunit alpha OS=Homo sapiens OX=9606	TCP1	+	Cluster -803	3.48942	0.000269982	20.317	14	7	129	7	556	60.3	6.11		18.2356	18.1499	18.0753	17.9584	17.9765	18.0855	18.3968	17.65	17.9345	17.8356	17.3572	17.4925	18.2602	18.3046	18.0468	17.5548	17.5425	17.5507	17.8482	17.9194	17.9052	17.849	18.2624	17.6463
	0.542987	-0.147587	0.902759	High	O94903	Pyridoxal phosphate homeostasis protein OS=Homo sapiens OX=9606	PLPBP	+	Cluster -803	7.52183	4.0404e-05	3.134	3	1	51	1	275	30.3	7.5		15.5249	15.532	15.4348	15.3673	15.541	15.1406	16.3258	15.293	15.9907	15.5566	15.5283	15.2606	14.7819	15.0078	15.1	14.5212	14.4603	14.7817	15.4124	15.3641	15.3578	15.6184	15.5845	15.1586
	0.109743	-0.151844	0.900099	High	B9A064	Immunoglobulin lambda-like polypeptide 5 OS=Homo sapiens OX=9606	IGLL5			NaN	NaN	9.211	11	2	85	1	214	23	8.84		15.3866	14.1653	14.1597	14.7571	14.6569	13.842	14.7209	12.6248	14.7084	13.9825	14.1562	13.5703	14.1317	14.4256	14.4572	14.3265	13.6745	14.1712	14.0096	14.0967	13.9017	14.1192	13.8574	13.3185
	0.526421	-0.152522	0.899676	High	Q06330	Recombining binding protein suppressor of hairless OS=Homo sapiens OX=9606	RBPJ	+	Cluster -803	5.05201	5.36193e-05	17.098	9	4	164	4	500	55.6	7.18		18.6308	18.4144	18.1966	18.2682	18.2976	18.2185	18.337	17.1219	18.1472	18.0824	18.0418	18.0865	18.2574	18.4654	18.3225	17.5188	17.4017	17.5837	18.4271	18.3825	18.4316	18.4684	18.4477	17.9198
	1.93925	-0.154879	0.898208	High	P62805	Histone H4 OS=Homo sapiens OX=9606	H4C16	+	Cluster -800	8.07579	0	37.059	51	6	941	6	103	11.4	11.36		22.1871	22.0935	22.0741	21.9635	21.9578	21.9687	22.4104	21.5674	22.0788	21.3159	20.9429	20.9995	21.5607	21.6509	21.6391	22.2117	22.1512	22.1356	21.8055	21.752	21.7929	21.996	22.003	21.4412
	0.195427	-0.155889	0.897579	High	O14920	Inhibitor of nuclear factor kappa-B kinase subunit beta OS=Homo sapiens OX=9606	IKBKB	+	Cluster -803	3.88243	0.000149312	4.321	3	2	6	2	756	86.5	5.78		15.0293	15.3801	14.8713	14.4124	15.2827	15.1178	15.6942	15.2765	15.5361	15.0627	14.9202	14.8521	15.3476	15.3785	15.2341	14.6215	14.5819	14.7261	15.0035	15.184	15.214	15.2767	15.2322	14.9607
	1.22433	-0.156422	0.897248	High	P18124	60S ribosomal protein L7 OS=Homo sapiens OX=9606	RPL7	+	Cluster -800	8.3966	0	25.388	26	6	273	6	248	29.2	10.65		18.2178	18.0191	18.1325	17.9371	17.9959	17.9671	18.1122	17.93	18.3709	17.8955	17.1668	17.3642	17.8327	18.1529	18.0977	18.1828	18.1744	18.274	20.3339	19.962	20.1126	18.5565	18.1952	18.5354
	0.261412	-0.157908	0.896324	High	O95573	Fatty acid CoA ligase Acsl3 OS=Homo sapiens OX=9606	ACSL3	+	Cluster -803	1.81594	0.00657801	38.862	18	11	316	10	720	80.4	8.38		19.1947	18.7102	18.6202	18.5046	19.0066	18.5402	18.6215	18.129	18.5967	18.447	18.1495	18.2039	18.5665	18.6721	18.6649	18.3987	18.3201	18.3827	18.7338	18.7718	18.7642	19.1022	18.6727	18.6136
	0.399086	-0.158718	0.895821	High	P22314	Ubiquitin-like modifier-activating enzyme 1 OS=Homo sapiens OX=9606	UBA1			NaN	NaN	6.399	2	2	13	2	1058	117.8	5.76		16.1009	15.5479	15.8047	15.6365	15.5812	15.7597	15.8005	15.4855	15.7158	15.5905	14.6798	15.3158	15.4934	15.7469	15.7583	15.3552	15.4171	15.431	15.709	15.7179	15.9195	15.7332	15.6986	15.4445
	0.591394	-0.160646	0.894624	High	P61289	Proteasome activator complex subunit 3 OS=Homo sapiens OX=9606	PSME3	+	Cluster -800	7.74963	0	4.884	7	2	14	2	254	29.5	5.95		17.7243	17.6968	18.0727	17.686	17.6742	17.6517	17.5782	16.6688	17.5045	17.8427	17.9077	17.9193	17.6906	17.8955	17.8523	18.1289	18.1175	18.0882	18.5157	18.5488	18.4431	17.7252	17.7502	17.1943
	0.135928	-0.165255	0.891771	High	P39023	60S ribosomal protein L3 OS=Homo sapiens OX=9606	RPL3	+	Cluster -800	3.04841	0.000486224	74.686	32	11	307	11	403	46.1	10.18		20.1436	20.0628	20.3109	20.8869	19.6524	19.4822	19.6331	18.8353	19.47	19.349	19.5177	19.0583	19.5416	19.823	19.7031	19.6235	19.6499	19.6075	21.1187	21.0259	21.006	19.451	19.5665	19.6415
	0.576712	-0.168583	0.889716	High	P30050	60S ribosomal protein L12 OS=Homo sapiens OX=9606	RPL12	+	Cluster -800	8.87785	0	42.441	45	5	432	5	165	17.8	9.42		19.8226	20.1513	20.2478	19.8689	19.9105	19.9365	20.0455	18.8242	19.768	19.9395	19.8532	19.7759	19.7998	19.8632	19.886	20.2911	20.2822	20.4038	21.126	21.1082	21.1204	19.8456	19.7576	19.1965
	0.948459	-0.16862	0.889693	High	Q9ULV4	Coronin-1C OS=Homo sapiens OX=9606	CORO1C	+	Cluster -803	3.28754	0.000385787	24.778	15	6	195	6	474	53.2	7.08		17.7261	17.768	17.5064	17.4625	17.5237	17.5084	17.6913	17.281	17.81	17.3808	17.5235	17.3347	17.267	17.6196	17.7204	16.9115	17.0168	17.3064	18.344	17.6266	17.4319	18.1483	18.1343	18.1728
	0.44846	-0.170346	0.88863	High	Q9BRF8	Serine/threonine-protein phosphatase CPPED1 OS=Homo sapiens OX=9606	CPPED1	+	Cluster -803	3.48868	0.000269504	4.143	4	1	36	1	314	35.5	6.2		16.0793	15.6777	15.5958	15.4957	15.6212	15.7248	16.0035	14.6328	15.7244	15.4929	14.963	15.4963	15.445	15.4699	15.3892	14.6882	14.4912	14.6114	15.4162	15.5592	15.438	15.4682	15.377	14.7847
	0.398625	-0.171487	0.887927	High	Q71UM5	40S ribosomal protein S27-like OS=Homo sapiens OX=9606	RPS27L	+	Cluster -803	4.63913	5.72792e-05	13.812	23	2	408	1	84	9.5	9.45		19.8336	20.4259	19.9453	19.8866	19.8866	19.9172	20.149	19.4413	19.9743	19.8339	19.8244	19.7747	19.5383	19.7029	19.6788	19.2732	19.2034	19.3438	19.9705	19.9285	19.9206	19.8005	19.8026	19.4643
	0.738985	-0.172105	0.887547	High	P36578	60S ribosomal protein L4 OS=Homo sapiens OX=9606	RPL4	+	Cluster -800	13.8482	0	74.535	33	14	799	14	427	47.7	11.06	Met-loss+Acetyl [N-Term]	19.6866	19.879	19.9931	19.5674	19.7133	19.7617	20.1649	19.4435	20.0867	19.7575	19.449	19.5415	19.8865	20.0599	19.97	20.1428	20.121	20.2664	21.7555	21.7331	21.769	19.8737	20.0363	19.6461
	0.246569	-0.173707	0.886562	High	Q9Y230	RuvB-like 2 OS=Homo sapiens OX=9606	RUVBL2			NaN	NaN	11.235	7	3	88	3	463	51.1	5.64		16.0209	16.9253	16.7611	16.42	16.3644	16.4018	16.5686	15.6258	16.3529	16.2418	15.8695	15.9034	16.0623	16.1057	16.4151	16.0958	16.0559	15.9686	16.5246	16.4185	16.3631	16.3586	16.4688	16.0884
	0.268052	-0.17872	0.883486	High	P02686	Myelin basic protein OS=Homo sapiens OX=9606	MBP			NaN	NaN	2.768	3	1	40	1	304	33.1	9.79		15.6861	15.2262	16.1163	15.3561	15.5831	15.5533	15.3543	13.6963	15.1858	15.3904	15.1879	15.2453	15.2536	15.0503	14.9883	15.214	15.0099	15.056	15.422	15.2181	15.2177	15.3456	15.2986	14.8956
	1.05399	-0.178984	0.883325	High	P13489	Ribonuclease inhibitor OS=Homo sapiens OX=9606	RNH1	+	Cluster -803	4.60964	6.60377e-05	78.815	49	14	820	14	461	49.9	4.82		21.4728	21.4001	21.5246	21.3448	21.1453	21.3705	21.604	20.6028	21.4351	21.3663	21.1622	21.1702	21.1592	21.3181	21.0343	21.0529	20.9825	21.1237	21.4035	21.5254	21.5693	21.448	21.4072	20.9111
	0.942067	-0.179008	0.88331	High	P12956	X-ray repair cross-complementing protein 6 OS=Homo sapiens OX=9606	XRCC6	+	Cluster -803	13.4336	0	28.928	15	8	201	8	609	69.8	6.64		19.1559	19.0475	19.2194	18.8298	18.9728	19.0832	19.3066	18.2119	19.2531	19.253	18.8735	19.0668	21.0241	21.2169	21.1546	19.6504	19.6559	19.6675	19.7348	19.8819	19.9215	19.8657	19.7956	19.546
	0.162339	-0.180897	0.882154	High	Q68CZ2	Tensin-3 OS=Homo sapiens OX=9606	TNS3			NaN	NaN	26.56	8	8	178	8	1445	155.2	6.81		18.896	18.4452	17.5103	18.1173	18.2593	17.9323	18.3939	17.9064	18.4732	18.3513	18.1809	18.2017	18.7533	18.2276	18.4425	17.5356	18.1817	17.292	18.0914	18.6049	18.8362	18.4122	18.6231	18.2595
	0.464758	-0.181384	0.881856	High	Q13492	Phosphatidylinositol-binding clathrin assembly protein OS=Homo sapiens OX=9606	PICALM	+	Cluster -803	2.10022	0.00334694	4.27	3	2	6	2	652	70.7	7.9		15.0365	14.732	14.7562	14.8523	14.7348	14.3935	15.4922	14.6171	14.5775	14.5288	14.2374	14.741	15.4358	15.5222	15.5589	13.9578	13.9381	14.7132	15.2913	15.4789	15.5659	14.2157	14.1256	15.1635
	0.8098	-0.181981	0.881492	High	P62280	40S ribosomal protein S11 OS=Homo sapiens OX=9606	RPS11	+	Cluster -800	6.9086	5.19481e-05	27.339	34	7	313	7	158	18.4	10.3	Met-loss+Acetyl [N-Term]	20.0494	19.7497	19.7497	19.7244	19.6478	19.6307	19.5164	19.0546	19.6577	19.4038	19.0085	18.9571	19.451	19.5659	19.5207	19.8916	19.8432	19.8352	20.4475	20.5108	20.511	19.475	19.4372	19.3889
	0.503489	-0.182247	0.881329	High	P35030	Trypsin-3 OS=Homo sapiens OX=9606	PRSS3	+	Cluster -803	6.80087	5.08475e-05	6.744	4	1	40	1	304	32.5	7.49		16.8791	16.4547	16.9523	16.5481	16.5486	16.6428	16.5388	16.0054	16.678	16.9016	16.8605	16.9486	17.0424	17.178	16.8972	17.1718	17.0773	17.2744	17.0167	17.0609	17.1598	17.3623	17.2836	17.1291
	0.671428	-0.184595	0.879896	High	P49207	60S ribosomal protein L34 OS=Homo sapiens OX=9606	RPL34	+	Cluster -800	4.34879	7.09534e-05	8.687	21	3	232	3	117	13.3	11.47		19.669	19.6963	19.3408	19.3142	19.4814	19.3568	19.5793	18.2134	19.5631	19.0647	18.4659	18.4208	19.0081	19.0337	18.9902	19.0575	19.151	19.1166	20.0135	19.9653	20.0325	18.9356	18.9226	18.8028
	1.01929	-0.189735	0.876767	High	Q16666	Gamma-interferon-inducible protein 16 OS=Homo sapiens OX=9606	IFI16			NaN	NaN	10.119	4	3	118	3	785	88.2	9.28		17.8818	17.7271	17.9654	17.6058	17.7728	17.6264	17.326	16.7592	17.3586	17.4058	17.0938	16.6528	17.5446	17.7433	17.2084	16.8439	17.3282	16.8114	17.6037	17.6265	17.7653	17.5034	17.0507	17.4032
	1.31557	-0.190036	0.876584	High	P17844	Probable ATP-dependent RNA helicase DDX5 OS=Homo sapiens OX=9606	DDX5	+	Cluster -803	4.65236	5.7554e-05	71.552	28	17	1314	10	614	69.1	8.92		19.7068	19.6573	19.8409	19.4733	19.5516	19.6099	19.7495	18.7189	19.3836	19.0795	18.8727	19.0657	19.5953	19.7631	19.7087	19.2372	19.0876	19.0149	19.5645	19.5649	19.6068	19.7812	19.4921	19.3894
	0.598272	-0.19238	0.875161	High	O00159	Unconventional myosin-Ic OS=Homo sapiens OX=9606	MYO1C	+	Cluster -800	7.99543	0	13.872	5	5	42	5	1063	121.6	9.41		16.9276	16.6684	16.4599	16.5694	16.5077	16.4016	16.9551	15.8126	16.7437	16.5271	16.3836	16.4148	16.5024	16.7591	16.6752	17.6728	17.7364	17.9621	17.1278	17.1604	17.1734	16.9796	16.7228	16.3329
	0.671497	-0.194163	0.87408	High	Q68D06	Schlafen family member 13 OS=Homo sapiens OX=9606	SLFN13	+	Cluster -803	6.33446	4.37956e-05	3.574	1	1	30	1	897	102	6.96		16.0901	16.487	16.1474	16.0575	15.9676	16.1168	15.8742	14.6927	15.7779	16.5017	16.3397	16.1367	16.0975	16.1686	16.1476	16.2307	16.2577	15.9915	16.3101	16.2843	16.3142	16.2138	16.1862	15.9535
	0.454104	-0.195691	0.873154	High	P61254	60S ribosomal protein L26 OS=Homo sapiens OX=9606	RPL26	+	Cluster -800	5.18142	4.49438e-05	10.253	18	3	189	3	145	17.2	10.55		19.4425	19.4832	20.0063	19.4606	19.3751	19.5093	19.9501	18.3293	19.2879	18.9968	18.9988	19.2013	19.3554	19.3051	19.2359	19.9737	19.8451	19.9886	20.4718	20.3258	20.5609	18.7332	18.9904	18.6406
	0.389385	-0.196555	0.872632	High	P61163	Alpha-centractin OS=Homo sapiens OX=9606	ACTR1A	+	Cluster -803	2.11706	0.00327123	8.572	9	2	40	2	376	42.6	6.64		17.562	17.0049	16.8934	17.0429	16.8693	16.9583	17.0883	16.1581	17.1901	17.0929	16.6584	16.6267	17.2767	17.2234	17.0937	16.8348	16.6768	17.0206	17.1	17.2432	17.1807	17.0807	17.0992	16.642
	0.376957	-0.198968	0.871173	High	Q5JXB2	Putative ubiquitin-conjugating enzyme E2 N-like OS=Homo sapiens OX=9606	UBE2NL			NaN	NaN	3.212	7	1	22	1	153	17.4	5.92		15.5505	15.0988	15.0513	14.7572	15.2896	15.0569	15.0103	12.5288	15.1204	14.6374	14.2408	14.1839	14.7077	14.6875	14.488	14.1707	14.3115	14.3162	14.5965	13.9068	14.4056	14.7483	14.4392	13.2877
	1.45223	-0.203714	0.868313	High	P62917	60S ribosomal protein L8 OS=Homo sapiens OX=9606	RPL8	+	Cluster -800	9.03648	0	37.004	36	6	462	6	257	28	11.03		19.3824	19.3463	19.4817	19.2499	19.2517	19.0977	19.1393	18.2878	19.3268	18.7807	18.4118	18.5433	18.8175	19.1142	18.8708	19.1818	19.1312	19.1589	20.4178	20.6799	20.7173	18.9519	18.6165	18.6023
	2.90182	-0.203728	0.868304	High	Q07020	60S ribosomal protein L18 OS=Homo sapiens OX=9606	RPL18	+	Cluster -800	10.4867	0	21.174	24	4	257	4	188	21.6	11.72		18.9803	19.0445	19.0022	18.78	18.8365	18.7993	18.674	17.5285	18.4254	18.2929	18.0401	17.866	18.1798	18.3182	18.2125	18.3631	18.2861	18.3515	19.9867	19.8523	19.8512	18.5354	18.4325	17.8645
	0.694301	-0.206509	0.866632	High	P47972	Neuronal pentraxin-2 OS=Homo sapiens OX=9606	NPTX2	+	Cluster -803	5.92577	3.94737e-05	22.991	19	6	181	6	431	47	5.63		17.9958	17.6893	18.058	17.5669	17.8133	17.7434	17.2052	16.6895	17.1946	17.3968	17.1357	17.368	18.3877	18.5816	18.4285	17.781	17.486	17.5548	17.6304	18.1667	18.127	18.1839	18.5379	18.2011
	0.257052	-0.208679	0.865329	High	Q07866	Kinesin light chain 1 OS=Homo sapiens OX=9606	KLC1			NaN	NaN	4.215	3	2	5	2	573	65.3	6.2		18.4015	18.0391	17.3333	17.8686	17.6269	17.6524	17.8586	16.9751	17.4296	17.5874	17.037	17.024	17.9923	17.813	17.6607	17.3968	17.3258	17.5646	17.5643	17.5572	17.5475	17.2816	17.6117	16.66
	0.122224	-0.208836	0.865235	High	Q5JRX3	Presequence protease, mitochondrial OS=Homo sapiens OX=9606	PITRM1			NaN	NaN	3.634	2	1	17	1	1037	117.3	6.92		15.7485	13.8604	15.6847	15.0396	14.8556	14.7718	14.8568	14.2501	15.0536	14.3722	14.3461	14.4233	14.5499	14.7985	14.8953	14.2253	14.0986	14.0092	14.3438	14.4856	14.5563	14.7034	14.7438	14.4184
	0.707409	-0.209134	0.865056	High	P32969	60S ribosomal protein L9 OS=Homo sapiens OX=9606	RPL9P9	+	Cluster -803	3.4271	0.000323944	24.9	34	5	130	5	192	21.9	9.95		21.9947	22.3452	22.271	21.8858	21.941	22.1568	22.1276	20.9678	21.7594	21.9474	21.7782	21.8352	21.9327	22.1552	21.9847	22.0026	22.0045	21.9962	21.9019	22.0944	21.8215	21.7814	21.8479	21.2409
	2.67574	-0.209199	0.865018	High	P84103	Serine/arginine-rich splicing factor 3 OS=Homo sapiens OX=9606	SRSF3	+	Cluster -803	4.30185	6.97168e-05	5.322	13	2	46	2	164	19.3	11.65		17.4654	17.5227	17.4833	17.2637	17.3292	17.2509	17.6805	16.6083	17.3627	17.0174	16.9267	17.0477	17.3211	17.3037	17.2278	17.3041	17.2767	17.3399	17.1966	17.2098	17.2025	17.1155	17.1804	16.6695
	0.541145	-0.20943	0.864879	High	P35637	RNA-binding protein FUS OS=Homo sapiens OX=9606	FUS	+	Cluster -803	2.84915	0.000696203	4.834	3	1	40	1	526	53.4	9.36		15.9963	15.5191	15.4582	15.4206	15.4774	15.4473	15.6763	14.7222	15.501	15.6876	15.0746	15.087	15.6167	15.8604	15.914	15.5902	15.5614	15.8331	16.1065	15.5739	15.6883	15.9898	15.6258	15.4867
	1.14247	-0.211576	0.863593	High	O00571	ATP-dependent RNA helicase DDX3X OS=Homo sapiens OX=9606	DDX3X	+	Cluster -803	2.03664	0.00386631	93.762	28	17	1192	3	662	73.2	7.18		17.488	17.6549	17.6106	17.2345	17.4722	17.412	17.5712	16.5461	17.7506	16.995	17.0636	16.7204	16.997	17.9035	17.638	16.6219	16.7675	16.5786	16.9684	17.2328	17.1454	17.0684	17.0637	17.3098
	1.12636	-0.212807	0.862857	High	P62191	26S proteasome regulatory subunit 4 OS=Homo sapiens OX=9606	PSMC1	+	Cluster -803	2.72043	0.00087037	6.651	6	2	35	2	440	49.2	6.21		16.4376	16.4222	16.2256	16.0861	16.2626	16.0984	15.922	14.6148	15.8636	15.8033	15.4105	15.3799	15.86	15.9949	15.9934	15.7504	15.681	15.8055	15.9381	15.7664	15.9779	15.9326	15.8624	15.3643
	0.728392	-0.215119	0.861475	High	P06702	Protein S100-A9 OS=Homo sapiens OX=9606	S100A9	+	Cluster -801	11.5262	0	95.407	73	11	722	11	114	13.2	6.13		22.5356	22.2558	22.2104	21.9793	22.0923	22.2848	19.6733	18.9294	19.5114	19.7079	19.1295	19.6713	19.4392	19.4454	18.9727	19.4829	19.4692	19.2109	20.0679	20.0822	20.11	19.1963	19.1694	18.5735
	0.804709	-0.21745	0.860084	High	P78371	T-complex protein 1 subunit beta OS=Homo sapiens OX=9606	CCT2			NaN	NaN	9.003	7	3	64	3	535	57.5	6.46		16.5387	16.1706	16.3074	16.0059	16.1323	16.2261	16.203	15.5229	16.2645	16.1269	15.6277	15.6918	15.9204	16.4138	16.0223	15.9871	16.1534	15.7976	15.9652	15.9604	16.474	16.056	16.0499	15.9436
	2.84098	-0.218584	0.859408	High	Q7Z2W4	Zinc finger CCCH-type antiviral protein 1 OS=Homo sapiens OX=9606	ZC3HAV1	+	Cluster -800	8.57504	0	53.19	20	13	274	13	902	101.4	8.4		18.9173	18.9013	18.9699	18.7072	18.6805	18.7452	18.9657	18.1529	18.8917	18.7681	18.5094	18.5378	18.5823	18.7137	18.8046	18.7196	18.5812	18.7877	19.4981	19.3676	19.4864	18.8573	18.7867	18.2313
	0.639869	-0.219043	0.859135	High	Q9Y2A7	Nck-associated protein 1 OS=Homo sapiens OX=9606	NCKAP1	+	Cluster -803	1.73985	0.00794956	12.971	3	3	118	3	1128	128.7	6.62		17.6264	17.2025	17.6056	17.1202	17.3268	17.3304	16.8717	16.471	18.3227	17.4556	17.3693	17.6025	18.4342	18.4275	18.4569	17.9835	17.5616	16.2677	17.2417	17.3268	17.3439	17.6601	17.7395	18.1298
	0.732091	-0.224616	0.855823	High	P14174	Macrophage migration inhibitory factor OS=Homo sapiens OX=9606	MIF	+	Cluster -803	5.67611	3.73832e-05	17.457	41	4	565	4	115	12.5	7.88		23.2555	23.6064	23.5923	23.1083	23.2857	23.3864	23.6566	22.8477	23.4498	23.1456	22.7647	22.6601	23.2184	23.4034	23.3739	22.7467	22.7179	22.8461	23.4115	23.3802	23.4371	23.1511	23.1568	22.7994
	1.47524	-0.224703	0.855771	High	Q99832	T-complex protein 1 subunit eta OS=Homo sapiens OX=9606	CCT7	+	Cluster -803	4.49321	6.42202e-05	31.748	15	8	370	8	543	59.3	7.65		19.1659	19.283	19.0592	18.904	18.9304	18.9996	19.0349	18.0196	18.8798	18.8065	18.3905	18.5341	18.8288	18.964	18.8579	18.5542	18.4829	18.5511	18.8236	18.8316	18.8404	18.8669	18.7902	18.3866
	1.28304	-0.227727	0.85398	High	O00233	26S proteasome non-ATPase regulatory subunit 9 OS=Homo sapiens OX=9606	PSMD9	+	Cluster -803	2.54992	0.00126347	6.422	9	2	37	2	223	24.7	6.95		16.4191	16.2229	16.1413	16.0111	16.039	16.0499	16.3861	16.2265	16.3328	16.0799	15.543	15.674	15.9895	16.0578	16.0846	15.6411	15.6321	15.7703	16.0851	16.1347	16.045	16.0808	16.1846	16.3206
	1.04819	-0.228319	0.853629	High	O75746	Electrogenic aspartate/glutamate antiporter SLC25A12, mitochondrial OS=Homo sapiens OX=9606	SLC25A12	+	Cluster -803	6.65093	4.93827e-05	9.625	6	4	47	2	678	74.7	8.38		15.9126	15.6175	15.712	15.4125	15.5583	15.5864	15.8454	14.9734	15.7535	15.7088	15.5643	15.6108	15.6813	15.8809	15.8405	15.5445	15.2833	15.5169	15.7433	15.8143	15.8425	15.9507	15.8559	15.5726
	0.268285	-0.230832	0.852143	High	Q05682	Caldesmon OS=Homo sapiens OX=9606	CALD1	+	Cluster -803	2.12864	0.00321536	28.112	11	7	191	7	793	93.2	5.66		19.3518	19.2755	18.7662	19.3111	18.3379	19.052	19.7139	18.4763	19.6644	18.563	18.3706	18.7816	18.7576	19.1651	19.2668	18.0519	18.1084	18.5326	18.9436	18.629	18.8457	19.5704	19.126	18.6453
	0.24092	-0.233817	0.850382	High	P40616	ADP-ribosylation factor-like protein 1 OS=Homo sapiens OX=9606	ARL1			NaN	NaN	5.601	11	2	27	2	181	20.4	5.72		15.1241	15.6624	16.4104	15.3328	15.5433	15.6193	15.7836	14.7146	15.5781	15.5537	14.9472	15.5829	15.3199	15.4392	15.4114	15.034	14.9361	13.9347	15.2218	15.2651	15.3524	15.0591	15.1945	15.1068
	0.985087	-0.23505	0.849656	High	Q9P2X3	Protein IMPACT OS=Homo sapiens OX=9606	IMPACT	+	Cluster -803	2.71474	0.000887519	3.309	3	1	62	1	320	36.5	4.97		15.9667	15.6268	15.7252	15.5811	15.5908	15.4417	15.937	15.4136	15.68	15.4883	15.4636	15.427	15.3816	15.342	15.4642	15.4836	15.0766	15.5715	15.5418	15.6826	15.6667	15.8031	15.7614	15.4581
	1.38337	-0.235581	0.849343	High	P11216	Glycogen phosphorylase, brain form OS=Homo sapiens OX=9606	PYGB	+	Cluster -803	3.76191	0.000159696	2.955	1	1	22	1	843	96.6	6.86		14.9545	14.7294	14.8877	14.6883	14.5409	14.6356	15.1877	14.3105	14.7917	14.6675	14.7157	14.1006	14.7904	14.8363	14.7368	14.2454	14.1266	14.2117	14.7581	14.9477	14.7674	14.8027	14.7427	14.6026
	1.74643	-0.237092	0.848454	High	Q9P2E9	Ribosome-binding protein 1 OS=Homo sapiens OX=9606	RRBP1	+	Cluster -800	5.34445	4.67836e-05	54.289	14	15	313	15	1410	152.4	8.6		19.9413	19.7459	19.8613	19.6566	19.5795	19.6011	19.7191	18.5661	19.7	19.5509	19.2564	19.2974	19.6886	19.7175	19.9035	19.463	18.9651	19.1579	20.4352	20.3367	20.2637	19.6773	19.7923	19.229
	0.676139	-0.237284	0.848341	High	P52209	6-phosphogluconate dehydrogenase, decarboxylating OS=Homo sapiens OX=9606	PGD	+	Cluster -800	1.74329	0.00791899	19.797	12	4	120	4	483	53.1	7.23		17.3872	17.89	17.6889	17.312	17.532	17.4103	17.3667	16.6814	17.4217	17.209	16.8487	16.647	17.0551	17.2016	17.4087	17.1822	17.0775	17.277	17.2741	17.1415	17.1481	17.11	17.2111	17.0561
	0.840082	-0.238948	0.847363	High	Q9Y6N5	Sulfide:quinone oxidoreductase, mitochondrial OS=Homo sapiens OX=9606	SQOR	+	Cluster -803	4.94585	5.16796e-05	20.603	11	4	144	4	450	49.9	9.11		17.8409	18.2924	18.1124	17.8298	17.8277	17.8713	17.8759	17.2653	17.7995	17.7471	17.2811	17.3159	17.6842	17.8521	17.836	17.0428	17.1086	17.1723	17.832	17.9225	17.9152	17.7713	17.8557	17.5152
	0.566662	-0.24162	0.845795	High	Q6NZI2	Caveolae-associated protein 1 OS=Homo sapiens OX=9606	CAVIN1	+	Cluster -803	2.49536	0.00140206	31.158	19	7	287	7	390	43.5	5.6		20.9429	20.5399	20.3144	20.3035	20.3201	20.4487	20.6196	19.9396	20.571	20.2524	20.1192	20.0711	20.3031	20.491	20.4041	20.2342	20.2545	20.2665	20.612	20.53	20.5425	20.474	20.361	20.0867
	2.23019	-0.242462	0.845302	High	Q8NBS9	Thioredoxin domain-containing protein 5 OS=Homo sapiens OX=9606	TXNDC5	+	Cluster -803	7.97945	0	71.519	34	12	824	12	432	47.6	5.97		21.7389	21.7887	21.7961	21.4508	21.5575	21.5881	22.109	21.5333	22.2199	21.7075	21.425	21.4894	21.5598	21.8228	21.6356	21.296	21.1415	21.1796	21.7168	21.651	21.744	21.9252	21.74	21.6943
	0.709116	-0.243278	0.844824	High	P07478	Trypsin-2 OS=Homo sapiens OX=9606	PRSS2	+	Cluster -803	2.16341	0.00294215	26.034	14	3	178	3	247	26.5	4.92		18.8668	18.6486	18.7562	18.4815	18.2833	18.777	19.1805	18.5086	18.923	18.6453	17.5418	18.0389	18.6462	18.953	18.916	18.858	18.2138	18.4772	18.8085	18.759	18.7004	18.5654	18.2157	18.2196
	1.29077	-0.243306	0.844807	High	P29590	Protein PML OS=Homo sapiens OX=9606	PML	+	Cluster -803	5.40281	3.5503e-05	34.586	13	10	240	10	882	97.5	6.21		18.573	18.469	18.5429	18.1418	18.2845	18.4286	18.5288	18.0034	18.7715	18.2793	18.3133	18.2875	18.3061	18.4648	18.4016	18.1103	18.1808	18.2361	18.4652	18.5215	18.5152	18.6496	18.5306	18.3575
	1.14185	-0.243935	0.844439	High	P62753	40S ribosomal protein S6 OS=Homo sapiens OX=9606	RPS6	+	Cluster -800	8.43375	0	19.762	21	5	266	5	249	28.7	10.84		19.0229	18.8316	19.1716	18.7364	18.8041	18.7538	18.8068	18.3448	18.5586	18.4705	18.3286	18.5055	18.5843	18.5919	18.6057	19.2572	19.3088	19.3609	20.0871	20.0989	20.0959	18.9601	18.8273	18.473
	0.344538	-0.244376	0.844181	High	P40121	Macrophage-capping protein OS=Homo sapiens OX=9606	CAPG	+	Cluster -801	6.41341	4.56274e-05	17.88	14	4	26	4	348	38.5	6.19		15.2493	15.8512	14.9198	15.0802	14.9144	15.2926	14.2449	12.4959	14.1867	13.3121	12.109	12.3757	12.5271	12.6547	13.0016	12.451	12.593	12.6393	13.2402	12.6965	12.6616	13.8887	13.758	13.0879
	1.75116	-0.245385	0.843591	High	Q02543	60S ribosomal protein L18a OS=Homo sapiens OX=9606	RPL18A	+	Cluster -800	9.63651	0	20.776	30	5	143	5	176	20.7	10.71		18.0527	18.1436	18.1709	17.8451	17.8072	17.9788	17.7914	17.4336	17.9353	17.5023	17.2701	17.3973	17.6309	17.9047	17.8517	17.977	17.8898	17.8786	19.3935	19.4865	19.4558	17.6159	17.6431	17.6323
	1.40747	-0.246665	0.842842	High	P20591	Interferon-induced GTP-binding protein Mx1 OS=Homo sapiens OX=9606	MX1	+	Cluster -803	5.93733	3.98671e-05	77.522	29	14	715	11	662	75.5	5.83		20.7087	20.592	20.8603	20.4441	20.4532	20.5236	20.0921	19.482	20.087	20.5411	20.3692	20.3681	20.3256	20.4538	20.4514	19.7742	19.7738	19.8911	20.129	20.4583	20.5248	20.3535	20.4251	20.0177
	0.912368	-0.250358	0.840688	High	P11387	DNA topoisomerase 1 OS=Homo sapiens OX=9606	TOP1	+	Cluster -800	7.49091	4e-05	20.976	8	6	114	6	765	90.7	9.31		17.6228	17.8606	17.4902	17.2861	17.4138	17.5226	17.7697	16.5395	17.3966	17.5595	17.175	17.3106	17.9928	18.0727	18.0294	17.8819	17.8013	17.9459	18.6726	18.652	18.6835	18.0007	17.4353	17.2532
	2.39758	-0.251772	0.839864	High	P23526	Adenosylhomocysteinase OS=Homo sapiens OX=9606	AHCY	+	Cluster -803	5.56806	3.69231e-05	64.611	39	15	636	15	432	47.7	6.34		22.1055	22.0667	22.0885	21.8398	21.9033	21.7622	21.955	21.3343	21.8867	21.6953	21.3151	21.2798	21.4401	21.5726	21.4489	21.3869	21.2396	21.275	21.5066	21.4306	21.4734	21.5353	21.424	21.3125
	0.298096	-0.253331	0.838957	High	P55084	Trifunctional enzyme subunit beta, mitochondrial OS=Homo sapiens OX=9606	HADHB	+	Cluster -803	1.9975	0.00422193	14.932	13	5	98	5	474	51.3	9.41		17.4289	17.3308	16.9889	16.6423	17.6309	16.7153	17.4174	16.4316	17.2243	16.9324	17.2104	17.2029	16.9629	17.6026	17.5444	16.8424	16.7899	16.8531	17.7774	17.6963	17.203	17.7306	17.7027	17.3635
	2.28292	-0.253654	0.838769	High	P47756	F-actin-capping protein subunit beta OS=Homo sapiens OX=9606	CAPZB	+	Cluster -803	11.4336	0	57.297	46	12	858	12	272	30.6	6		21.3755	21.3686	21.4398	21.0697	21.1456	21.2075	21.5621	20.7409	21.4367	21.1745	21.0951	21.0594	21.067	21.2075	21.1749	20.5299	20.5062	20.5506	21.2269	21.2402	21.2469	21.3526	21.3514	20.9689
	1.63848	-0.254312	0.838387	High	Q03518	Antigen peptide transporter 1 OS=Homo sapiens OX=9606	TAP1	+	Cluster -803	2.40207	0.00173585	4.975	2	1	35	1	748	80.9	7.31		15.3126	15.3485	15.1636	15.0301	14.9425	15.0892	15.1253	14.6366	15.0685	14.8886	14.8476	14.8028	14.9806	14.9724	14.9124	14.5197	14.4931	14.8805	15.2736	14.9671	15.3488	14.8159	14.9392	14.7383
	2.08055	-0.255545	0.837671	High	O95786	Antiviral innate immune response receptor RIG-I OS=Homo sapiens OX=9606	DDX58	+	Cluster -803	7.91437	0	27.455	10	9	160	9	925	106.5	6.4		18.4641	18.5078	18.6347	18.3045	18.2709	18.2646	18.1736	17.3322	18.0809	18.5518	18.2307	18.3697	18.0702	18.2525	18.1733	17.5171	17.6555	17.7388	18.296	18.3006	18.3504	18.1801	18.2059	17.9694
	2.33075	-0.256172	0.837307	High	Q5T440	Putative transferase CAF17, mitochondrial OS=Homo sapiens OX=9606	IBA57	+	Cluster -803	3.99375	0.000120724	10.008	12	4	36	4	356	38.1	9.83		16.8533	16.7936	16.8605	16.6098	16.5011	16.6279	16.927	15.5577	16.8035	16.5153	16.355	16.1671	16.5414	16.6475	16.6242	15.85	15.4985	15.6363	16.5154	16.6553	16.6076	16.36	16.4599	15.5505
	0.91286	-0.25664	0.837035	High	Q16831	Uridine phosphorylase 1 OS=Homo sapiens OX=9606	UPP1	+	Cluster -803	5.68678	3.75e-05	34.702	28	7	288	7	310	33.9	7.88	Met-loss+Acetyl [N-Term]	19.0888	18.6354	18.863	18.603	18.5898	18.6245	18.7927	18.0951	18.7276	18.6139	18.4145	18.4192	18.4339	18.5991	18.4218	17.791	17.8653	17.9008	18.4005	18.4925	18.5751	18.5446	18.5118	18.2027
	0.670951	-0.257833	0.836343	High	P51114	RNA-binding protein FXR1 OS=Homo sapiens OX=9606	FXR1	+	Cluster -800	5.03051	5.29101e-05	17.247	14	5	72	4	621	69.7	6.15	Met-loss+Acetyl [N-Term]	16.3052	15.8087	16.1383	15.7909	15.6812	16.0066	16.2331	13.9982	16.0484	16.1997	15.7105	15.9988	16.1712	16.024	16.4298	17.5251	17.6214	17.6212	16.4172	16.7282	16.763	16.1892	16.1195	15.737
	1.32126	-0.259493	0.835382	High	P22626	Heterogeneous nuclear ribonucleoproteins A2/B1 OS=Homo sapiens OX=9606	HNRNPA2B1	+	Cluster -800	7.35972	5.71429e-05	26.965	25	7	367	6	353	37.4	8.95		19.4855	19.1937	19.4092	19.1028	19.0539	19.1531	19.3557	18.5453	19.2048	18.9285	18.6572	18.7757	19.0389	19.1235	19.1052	19.5673	19.4635	19.6012	19.1771	19.1647	19.2233	19.238	19.2826	18.9726
	0.846515	-0.260314	0.834906	High	Q13546	Receptor-interacting serine/threonine-protein kinase 1 OS=Homo sapiens OX=9606	RIPK1	+	Cluster -803	8.05986	0	5.67	4	2	45	2	671	75.9	6.33		16.1045	16.1894	15.8825	15.6022	15.8119	15.9813	16.1018	15.3751	16.1608	16.3039	16.1292	15.9827	16.2759	16.3721	16.2798	15.5006	15.5319	15.351	16.2275	16.3991	16.4289	16.3753	16.4616	15.9888
	1.02876	-0.26497	0.832216	High	P37108	Signal recognition particle 14 kDa protein OS=Homo sapiens OX=9606	SRP14	+	Cluster -800	3.44921	0.000310954	6.407	10	2	36	2	136	14.6	10.04		16.6437	16.4498	16.2256	16.1793	16.1636	16.1813	15.9018	15.6698	16.2582	15.7848	15.3055	15.7616	16.1017	16.1795	16.416	16.0412	16.0805	15.9466	16.9574	16.6528	16.7825	16.5561	16.4374	16.1452
	1.45646	-0.264994	0.832202	High	O60313	Dynamin-like 120 kDa protein, mitochondrial OS=Homo sapiens OX=9606	OPA1	+	Cluster -803	8.41003	0	73.973	24	21	683	21	960	111.6	7.87		20.2981	20.3814	20.3595	19.9483	20.0687	20.227	20.3552	19.7176	20.3676	20.1674	20.014	20.0185	20.2271	20.4919	20.2935	19.4762	19.5566	19.4631	20.1838	20.2762	20.3618	20.5244	20.6427	20.2722
	0.916799	-0.26565	0.831824	High	P41240	Tyrosine-protein kinase CSK OS=Homo sapiens OX=9606	CSK	+	Cluster -803	5.7684	3.79747e-05	7.063	5	2	77	2	450	50.7	7.06		16.6392	16.2157	16.3458	16.1641	16.035	16.2047	16.5819	15.5795	16.425	16.1	15.7892	15.858	16.0245	16.2354	16.1748	15.3357	15.2439	15.0742	16.2123	16.1945	16.3108	16.2337	16.1345	15.5782
	0.777871	-0.265757	0.831762	High	P61978	Heterogeneous nuclear ribonucleoprotein K OS=Homo sapiens OX=9606	HNRNPK	+	Cluster -803	2.4139	0.00170597	37.942	22	10	360	10	463	50.9	5.54	Acetyl [N-Term]	20.0903	19.6238	19.657	19.4327	19.5882	19.553	19.5805	18.7764	19.3938	19.3254	18.9648	19.1081	19.44	19.5322	19.504	19.4898	19.4406	19.5717	19.6617	19.6485	19.6345	19.6709	19.4939	19.1859
	1.70042	-0.266134	0.831545	High	P28482	Mitogen-activated protein kinase 1 OS=Homo sapiens OX=9606	MAPK1	+	Cluster -803	3.28611	0.000391892	66.064	40	12	849	10	360	41.4	6.98		21.3395	21.3803	21.1509	21.0124	21.025	21.0349	21.1354	19.9399	21.1084	21.0808	20.6358	20.8058	21.009	21.1576	21.0906	20.5504	20.4958	20.7159	21.1987	21.0746	21.1224	21.1816	20.9046	20.6767
	1.8576	-0.267251	0.830901	High	P04632	Calpain small subunit 1 OS=Homo sapiens OX=9606	CAPNS1	+	Cluster -803	5.33343	4.66472e-05	25.606	28	6	265	6	268	28.3	5.2		19.2593	19.1117	19.312	18.9846	18.9164	18.9803	19.2052	18.3473	19.0783	18.8049	18.6122	18.5192	18.8239	18.8728	18.8995	18.5558	18.5487	18.5142	18.7596	18.8563	18.8553	18.5605	18.629	18.4734
	1.23439	-0.26819	0.83036	High	P30048	Thioredoxin-dependent peroxide reductase, mitochondrial OS=Homo sapiens OX=9606	PRDX3	+	Cluster -803	2.69054	0.000948012	8.44	12	3	108	3	256	27.7	7.78		17.3493	17.1804	17.2425	16.8106	17.0732	17.0838	17.1197	15.494	16.4659	16.674	16.4722	16.4975	16.7888	16.8274	17.0552	16.6187	16.9115	17.0112	17.4007	16.7273	16.9691	17.5684	17.3285	17.3659
	1.54503	-0.268484	0.830191	High	Q13573	SNW domain-containing protein 1 OS=Homo sapiens OX=9606	SNW1	+	Cluster -803	4.27985	6.88172e-05	2.681	2	1	8	1	536	61.5	9.52		17.2938	17.3297	17.0984	16.9042	16.9891	17.0232	17.253	16.4087	16.9902	16.8281	16.8687	16.5011	17.0771	17.2667	17.0991	17.0285	16.9333	17.007	17.0066	16.8708	16.9144	17.0182	16.9356	16.7054
	0.793429	-0.268943	0.829928	High	Q13813	Spectrin alpha chain, non-erythrocytic 1 OS=Homo sapiens OX=9606	SPTAN1	+	Cluster -803	1.78274	0.00712071	17.128	3	7	33	7	2472	284.4	5.35		17.1673	16.6695	16.954	16.6596	16.5566	16.7678	16.9061	15.5353	16.7311	16.4593	16.0237	16.3826	16.6555	17.051	16.9948	16.3236	16.4149	16.4926	16.9584	16.9724	16.7717	16.7529	16.7577	16.3844
	1.91636	-0.273191	0.827487	High	Q6YN16	Hydroxysteroid dehydrogenase-like protein 2 OS=Homo sapiens OX=9606	HSDL2	+	Cluster -803	3.10043	0.000446634	48.639	26	9	368	9	418	45.4	7.99		19.2337	19.3118	19.3209	18.9076	19.0422	19.0971	18.9769	18.7469	19.1475	19.0317	18.5674	18.4643	18.8101	18.8988	19.0222	18.4666	17.9953	18.3968	18.6715	18.79	19.0278	19.0817	18.9541	19.0278
	2.51656	-0.274611	0.826673	High	Q9BRJ7	Tudor-interacting repair regulator protein OS=Homo sapiens OX=9606	NUDT16L1	+	Cluster -803	7.22907	5.52995e-05	18.773	36	6	162	6	211	23.3	8.91	Met-loss+Acetyl [N-Term]	17.992	18.1043	18.0471	17.7174	17.8052	17.797	18.0183	17.1861	17.7298	17.5916	17.4136	17.1945	17.4064	17.5719	17.4498	17.0607	17.1419	17.1886	17.7232	17.7764	17.772	17.9633	17.9463	17.615
	1.57766	-0.275248	0.826309	High	P31153	S-adenosylmethionine synthase isoform type-2 OS=Homo sapiens OX=9606	MAT2A	+	Cluster -803	9.53865	0	40.947	24	7	281	7	395	43.6	6.48		19.8065	19.7486	19.791	19.3962	19.4661	19.658	20.0207	19.1941	19.8458	19.6923	19.599	19.5242	19.6264	19.7523	19.7609	19.3275	19.339	19.409	19.8358	19.791	19.8719	19.7657	19.7746	19.396
	1.21159	-0.276467	0.82561	High	P46779	60S ribosomal protein L28 OS=Homo sapiens OX=9606	RPL28	+	Cluster -800	9.82387	0	17.886	29	4	226	4	137	15.7	12.02	Met-loss+Acetyl [N-Term]	18.6798	18.8892	18.7554	18.3608	18.472	18.6623	18.7281	17.623	18.2101	18.4461	18.2413	18.3186	18.9879	18.9159	19.0649	19.359	19.4041	19.5218	20.9245	20.9876	20.8172	19.2149	19.0478	18.0947
	0.203534	-0.281562	0.8227	High	Q9H4L5	Oxysterol-binding protein-related protein 3 OS=Homo sapiens OX=9606	OSBPL3	+	Cluster -803	2.79142	0.000744914	3.224	1	1	8	1	887	101.2	6.87		13.4241	13.2623	13.012	11.9364	13.6578	13.2595	13.1376	13.9586	13.8116	13.7996	13.9499	13.6207	14.1216	14.049	13.9767	13.7579	13.8832	13.7657	14.2107	14.2723	14.4132	14.4133	14.371	13.989
	1.19565	-0.282494	0.822168	High	P62879	Guanine nucleotide-binding protein G(I)/G(S)/G(T) subunit beta-2 OS=Homo sapiens OX=9606	GNB2			NaN	NaN	4.507	6	2	8	2	340	37.3	6		15.3268	15.1691	15.3314	15.0197	14.8129	15.1472	14.7733	14.9948	14.5211	14.5215	14.5477	14.3047	14.6505	15.1053	14.9669	14.3589	14.5466	14.6231	14.7366	14.6308	14.584	14.5187	14.5262	15.8118
	0.879528	-0.286653	0.819802	High	P62316	Small nuclear ribonucleoprotein Sm D2 OS=Homo sapiens OX=9606	SNRPD2	+	Cluster -800	1.81461	0.00658493	5.873	17	2	37	2	118	13.5	9.91		16.7214	16.3907	16.2578	16.2231	16.0434	16.2435	16.2725	15.251	16.2218	15.7355	15.5168	15.5989	16.023	16.1921	16.3052	16.7219	16.4514	16.4703	16.1169	16.1796	16.0007	16.0712	16.0268	14.4744
	0.734185	-0.287672	0.819223	High	P41219	Peripherin OS=Homo sapiens OX=9606	PRPH	+	Cluster -803	1.99343	0.00426877	25.463	8	5	729	1	470	53.6	5.47		15.5412	14.9594	15.4292	15.0285	14.9815	15.0568	14.8353	13.1945	14.4557	14.6974	14.3925	14.2356	14.8719	14.9614	14.9361	14.7278	14.7837	14.7134	14.7378	15.0205	15.0469	14.914	14.7249	14.3794
	0.831491	-0.290828	0.817433	High	Q4G0N4	NAD kinase 2, mitochondrial OS=Homo sapiens OX=9606	NADK2	+	Cluster -803	2.69544	0.00093865	3.974	3	1	28	1	442	49.4	8.18		14.736	15.0312	14.7861	14.3257	14.5648	14.7903	14.8111	14.3461	14.594	14.5132	14.5919	14.2994	14.8241	14.9176	14.8171	14.6085	14.2804	14.6988	14.3882	14.3264	14.7025	14.7533	14.8851	14.651
	0.941131	-0.292896	0.816262	High	O43795	Unconventional myosin-Ib OS=Homo sapiens OX=9606	MYO1B	+	Cluster -800	2.10819	0.00330055	4.724	2	2	26	2	1136	131.9	9.38		15.599	15.3799	15.7412	15.1345	15.2332	15.4737	15.3612	15.0305	15.2276	15.189	15.1694	15.2074	15.5356	15.3826	15.1988	15.0791	14.7827	15.2803	15.717	15.7137	15.8272	15.2805	15.1995	14.6503
	0.542116	-0.295039	0.81505	High	P31943	Heterogeneous nuclear ribonucleoprotein H OS=Homo sapiens OX=9606	HNRNPH1	+	Cluster -800	2.10843	0.00330506	31.011	18	6	218	5	449	49.2	6.3		18.7935	18.8326	18.1415	18.3436	18.4138	18.1251	18.6973	18.311	18.6799	17.9724	17.8565	17.6575	18.0767	18.2781	18.2245	18.3185	18.5152	18.5536	18.3029	18.46	18.4214	18.3738	18.3224	18.2337
	0.114876	-0.295078	0.815028	High	P12081	Histidine--tRNA ligase, cytoplasmic OS=Homo sapiens OX=9606	HARS1			NaN	NaN	5.413	4	2	3	2	509	57.4	5.88		14.9496	11.7769	13.0116	13.1933	12.9239	12.7357	13.7273	12.5734	13.912	12.4279	12.1595	10.9133	12.6045	12.2403	13.1581	12.1855	12.1639	13.5578	13.5718	12.4807	14.3222	13.4907	12.3043	13.7175
	1.50331	-0.297514	0.813653	High	P54136	Arginine--tRNA ligase, cytoplasmic OS=Homo sapiens OX=9606	RARS1	+	Cluster -803	3.24917	0.00040871	16.767	9	5	103	5	660	75.3	6.68		18.4469	18.368	18.2097	17.9464	18.0344	18.1512	18.232	17.4069	17.8705	18.0989	17.8144	17.7103	18.0794	18.0431	18.0404	17.8942	17.7304	17.8401	18.1389	18.2178	18.2962	18.1834	18.0008	17.7081
	1.37772	-0.298729	0.812969	High	Q9Y676	28S ribosomal protein S18b, mitochondrial OS=Homo sapiens OX=9606	MRPS18B	+	Cluster -800	10.3818	0	2.927	4	1	3	1	258	29.4	9.38		13.7193	13.4953	13.4575	13.2563	13.3633	13.1563	13.4896	12.6784	13.3907	12.6776	12.5433	12.8715	13.4715	13.4787	13.6137	14.8677	14.9589	14.9906	13.9428	13.9468	13.9053	13.1114	13.1915	13.0196
	1.08542	-0.299846	0.812339	High	P01023	Alpha-2-macroglobulin OS=Homo sapiens OX=9606	A2M	+	Cluster -801	4.82859	4.9505e-05	14.408	4	5	65	5	1474	163.2	6.46		15.6648	15.9579	16.023	15.4622	15.7004	15.5835	15.6759	14.8851	15.7641	14.928	14.8653	14.7592	14.9146	15.1536	15.1314	14.5593	14.4231	14.9659	15.4914	15.42	15.4947	15.3503	15.4682	14.9069
	0.509362	-0.299881	0.812319	High	P62328	Thymosin beta-4 OS=Homo sapiens OX=9606	TMSB4X			NaN	NaN	2.715	27	1	8	1	44	5.1	5.06	Met-loss+Acetyl [N-Term]	16.4603	15.6784	15.7755	15.739	15.7579	15.5177	15.6566	14.378	15.8404	15.5993	15.0827	15.1273	15.5505	15.527	15.661	15.8318	15.8038	15.9641	15.5978	15.6736	15.7287	15.8217	15.6774	15.3986
	1.68546	-0.299893	0.812313	High	O43143	ATP-dependent RNA helicase DHX15 OS=Homo sapiens OX=9606	DHX15	+	Cluster -803	2.52332	0.0013373	14.565	7	5	142	5	795	90.9	7.46		17.4862	17.7643	17.6455	17.3276	17.324	17.3446	17.5012	16.919	17.5369	18.0059	16.9531	16.8988	17.0838	17.1924	17.0746	16.5588	16.9326	16.8619	17.1293	17.2604	17.3544	17.4953	18.0128	17.6944
	1.5867	-0.301023	0.811677	High	P42166	Lamina-associated polypeptide 2, isoform alpha OS=Homo sapiens OX=9606	TMPO	+	Cluster -803	3.70966	0.000180451	4.129	2	1	34	1	694	75.4	7.66		16.0649	15.8351	15.7908	15.5847	15.6334	15.5697	15.7984	15.1008	15.7785	15.3745	15.3662	15.2198	15.6993	15.8977	15.7522	15.7995	15.7408	15.6287	15.6578	15.7495	15.6664	15.5632	15.634	15.3954
	1.90059	-0.30215	0.811043	High	Q8TCB0	Interferon-induced protein 44 OS=Homo sapiens OX=9606	IFI44	+	Cluster -803	4.87922	5.03778e-05	9.996	10	3	54	3	444	50.5	6.89		16.3006	16.2804	16.3677	15.8842	16.0742	16.0838	16.5402	15.467	16.4387	16.2761	16.0769	16.0944	15.9886	16.3396	16.1791	15.73	15.9784	15.9253	16.2427	16.3286	16.2572	16.3657	16.4694	15.9723
	0.248042	-0.30221	0.811009	High	Q9NVI7	ATPase family AAA domain-containing protein 3A OS=Homo sapiens OX=9606	ATAD3A			NaN	NaN	22.535	11	7	309	1	634	71.3	8.98		14.6011	15.8692	16.162	15.152	15.2292	15.3444	14.687	14.1225	15.1482	14.9028	14.9907	15.0531	14.8497	15.1532	15.3224	14.7818	14.9187	14.8233	15.6778	15.6392	15.5785	15.3309	15.3008	14.5522
	2.06625	-0.302427	0.810887	High	Q9NUI1	Peroxisomal 2,4-dienoyl-CoA reductase [(3E)-enoyl-CoA-producing] OS=Homo sapiens OX=9606	DECR2	+	Cluster -803	5.98533	4.02685e-05	19.503	21	5	144	5	292	30.8	9.22		18.1702	18.1334	18.0353	17.8009	17.7321	17.8986	18.2698	17.7928	18.3216	17.5649	17.5698	17.4312	17.7798	17.841	17.6421	17.2185	17.2724	17.2022	18.0926	17.8319	18.0446	18.282	18.0564	18.1605
	0.337817	-0.303031	0.810548	High	Q63HN8	E3 ubiquitin-protein ligase RNF213 OS=Homo sapiens OX=9606	RNF213	+	Cluster -803	1.96808	0.00445669	9.026	1	3	51	3	5207	591	6.48		16.3738	15.1783	16.1312	15.478	15.7022	15.594	16.1338	15.0265	15.5313	16.0948	15.6675	15.5481	15.8131	16.095	16.0013	15.4602	15.1018	15.4934	16.0205	16.147	16.1362	16.2106	16.1249	15.7687
	1.45039	-0.30415	0.809919	High	P63151	Serine/threonine-protein phosphatase 2A 55 kDa regulatory subunit B alpha isoform OS=Homo sapiens OX=9606	PPP2R2A	+	Cluster -801	5.8825	3.8835e-05	60.821	30	9	379	6	447	51.7	6.2		17.898	18.059	18.1878	17.7304	17.8361	17.6658	17.6376	16.65	17.3563	17.1833	16.5201	16.4421	16.9634	17.2574	17.2765	16.19	16.4746	16.2239	17.3497	17.5195	17.4771	17.1304	17.005	16.4514
	0.296394	-0.30433	0.809818	High	Q9NR30	Nucleolar RNA helicase 2 OS=Homo sapiens OX=9606	DDX21	+	Cluster -800	2.90718	0.000638978	13.914	6	4	78	4	783	87.3	9.28		17.3754	17.2161	16.216	16.9974	16.2912	16.606	16.9567	16.3588	16.7501	16.6012	17.0254	16.5606	16.4574	16.5622	17.1778	17.7839	17.7056	17.8044	17.4061	17.688	17.8003	17.2788	16.8436	16.4348
	0.32006	-0.30514	0.809364	High	P15311	Ezrin OS=Homo sapiens OX=9606	EZR			NaN	NaN	28.884	15	9	182	6	586	69.4	6.27		15.8683	14.6669	15.7074	14.9519	15.3075	15.0677	14.5636	14.3198	14.8734	15.168	14.1489	14.7491	14.658	14.6696	14.9249	15.0497	14.3529	14.8345	15.6765	15.0959	14.8033	14.974	14.8339	14.6776
	1.42898	-0.305441	0.809195	High	P13639	Elongation factor 2 OS=Homo sapiens OX=9606	EEF2	+	Cluster -803	4.25222	7.65957e-05	90.026	29	19	895	19	858	95.3	6.83		21.2334	20.9261	20.9695	20.7314	20.6962	20.785	20.9155	20.0906	20.6532	20.6272	20.2819	20.3311	20.5146	20.6837	20.5685	20.2215	20.0596	20.1334	20.6049	20.657	20.6787	20.5943	20.5539	20.1699
	1.48961	-0.307826	0.807858	High	Q9NZM1	Myoferlin OS=Homo sapiens OX=9606	MYOF	+	Cluster -803	2.58493	0.00116517	19.251	4	7	99	7	2061	234.6	6.18		18.0611	17.977	17.843	17.5119	17.6996	17.7462	18.0321	16.9136	17.6837	17.4217	17.4035	17.4241	17.7067	17.8888	17.8401	17.5394	17.3155	17.5672	17.5401	17.8939	17.6246	17.9345	17.7882	17.6392
	0.203773	-0.308969	0.807219	High	P20042	Eukaryotic translation initiation factor 2 subunit 2 OS=Homo sapiens OX=9606	EIF2S2			NaN	NaN	2.87	4	1	20	1	333	38.4	5.8		14.899	13.4714	15.4102	14.2939	14.1461	14.4138	14.4663	13.6014	14.4006	14.7556	14.7124	14.5297	14.5201	14.3362	14.505	14.7575	14.824	15.0694	14.6915	14.8808	15.012	14.6878	14.5945	14.3528
	0.649304	-0.309704	0.806807	High	O95373	Importin-7 OS=Homo sapiens OX=9606	IPO7	+	Cluster -800	4.48023	6.40732e-05	5.839	3	2	59	2	1038	119.4	4.82		16.382	15.8385	16.1944	15.5437	15.9224	16.0198	16.1377	15.3043	16.0255	15.7556	15.5084	15.5406	15.9715	16.1952	15.9452	16.4731	16.5466	16.3774	16.0223	16.224	16.036	15.9097	15.7812	15.5473
	0.867038	-0.310032	0.806624	High	P19012	Keratin, type I cytoskeletal 15 OS=Homo sapiens OX=9606	KRT15	+	Cluster -803	5.31945	4.63768e-05	74.269	38	18	1382	5	456	49.2	4.77		19.4753	19.792	20.0482	19.4634	19.4866	19.4353	19.9055	19.1849	19.912	19.5045	19.5219	19.5807	19.4792	19.6267	19.5765	18.9498	18.8819	18.9087	19.6324	19.6963	19.6544	19.689	19.6845	19.3238
	0.10566	-0.312751	0.805105	High	Q7Z406	Myosin-14 OS=Homo sapiens OX=9606	MYH14			NaN	NaN	32.965	3	7	287	2	1995	227.7	5.6		13.574	14.2316	14.1322	11.6737	14.1043	15.2217	15.8143	14.2353	13.021	14.9838	15.0134	15.3429	15.2082	14.8423	15.584	15.1634	15.1	12.0169	12.4501	15.7051	14.9903	12.2725	11.9408	12.9569
	1.92232	-0.312858	0.805045	High	P47929	Galectin-7 OS=Homo sapiens OX=9606	LGALS7B	+	Cluster -801	10.7183	0	64.468	85	8	442	8	136	15.1	7.62	Met-loss+Acetyl [N-Term]	19.8525	19.6613	19.6894	19.3764	19.5006	19.3877	16.3036	16.3426	15.9055	16.5106	16.6065	16.5903	16.3217	16.3699	16.6066	16.5384	16.7236	16.8678	16.7042	16.9184	16.9534	15.9336	15.9212	15.6021
	0.961448	-0.313262	0.80482	High	P07108	Acyl-CoA-binding protein OS=Homo sapiens OX=9606	DBI	+	Cluster -801	6.68193	4.95868e-05	3.115	9	1	33	1	87	10	6.57		14.823	15.3054	15.2406	14.8449	14.8111	14.7733	13.7026	12.8146	13.8365	13.5016	12.7817	13.2263	12.6702	13.1071	13.662	13.7005	13.3867	13.6105	12.7521	12.8023	13.0598	13.1186	12.8158	12.0215
	0.677654	-0.313474	0.804702	High	O00139	Kinesin-like protein KIF2A OS=Homo sapiens OX=9606	KIF2A	+	Cluster -803	4.53616	6.49652e-05	12.236	7	5	66	4	706	79.9	6.68		16.3378	16.291	16.9362	16.2522	16.1457	16.2267	16.3132	16.0412	16.4579	16.5351	15.9808	16.3841	16.4026	16.6173	16.593	15.4496	14.6927	15.4995	16.5904	16.5362	16.4438	16.9916	16.7321	16.4914
	1.27587	-0.315108	0.803791	High	P35998	26S proteasome regulatory subunit 7 OS=Homo sapiens OX=9606	PSMC2			NaN	NaN	18.767	11	4	47	4	433	48.6	5.95		16.9908	17.1925	16.8642	16.8313	16.6427	16.6282	16.3215	15.7696	16.4164	16.6776	15.5165	15.726	16.5249	16.2295	16.1533	16.5492	16.5713	16.1265	16.8424	16.7603	15.9553	16.8269	15.8799	16.4017
	1.89484	-0.320414	0.80084	High	Q93008	Probable ubiquitin carboxyl-terminal hydrolase FAF-X OS=Homo sapiens OX=9606	USP9X	+	Cluster -803	2.45415	0.00158944	13.42	3	5	94	5	2554	290.3	5.8		17.0256	17.181	17.2416	16.9048	16.7935	16.7887	16.943	15.522	17.0316	16.8504	16.7595	16.6873	16.9275	16.9723	16.9714	16.5463	16.407	16.3314	16.9495	16.8267	16.8892	16.975	16.9099	16.685
	1.28815	-0.323846	0.798937	High	P78347	General transcription factor II-I OS=Homo sapiens OX=9606	GTF2I	+	Cluster -803	5.98423	4.01338e-05	95.959	23	21	1448	21	998	112.3	6.39	Met-loss+Acetyl [N-Term]	21.6767	21.664	21.5041	21.0939	21.3326	21.4468	21.6015	20.8927	21.4914	21.3741	20.95	21.1242	21.4442	21.387	21.5244	20.9079	20.8227	20.8401	21.4311	21.62	21.6907	21.6905	21.6539	21.4135
	0.672829	-0.323944	0.798883	High	Q16576	Histone-binding protein RBBP7 OS=Homo sapiens OX=9606	RBBP7			NaN	NaN	9.892	7	3	37	1	425	47.8	5.05		14.5946	14.745	14.2592	14.0049	14.5351	14.087	14.6641	13.4126	13.9693	13.878	13.7013	13.3344	14.4314	14.3584	14.1029	14.3249	12.2765	13.2883	14.3324	14.4772	14.318	14.3822	14.1423	13.903
	1.20315	-0.326403	0.797523	High	Q53GL7	Protein mono-ADP-ribosyltransferase PARP10 OS=Homo sapiens OX=9606	PARP10	+	Cluster -803	3.39771	0.000347826	4.677	2	2	6	2	1025	109.9	4.97		17.6573	17.9631	17.5787	17.3639	17.3496	17.5065	17.9554	17.293	17.5348	17.3853	17.4527	17.2512	17.5981	17.8139	17.8534	17.6611	17.5177	17.623	17.5119	17.6337	17.6395	17.5134	17.4947	17.189
	1.24502	-0.326569	0.797431	High	P05198	Eukaryotic translation initiation factor 2 subunit 1 OS=Homo sapiens OX=9606	EIF2S1	+	Cluster -803	2.3688	0.00189383	6.617	7	2	64	2	315	36.1	5.08		16.4491	16.071	16.1098	15.8492	15.8636	15.9373	15.6798	14.3576	15.482	15.8874	15.4211	15.595	15.5398	15.6763	15.686	15.8764	15.7886	15.7316	15.6825	15.8368	15.7171	15.836	15.5353	14.8503
	2.55101	-0.326743	0.797334	High	P63167	Dynein light chain 1, cytoplasmic OS=Homo sapiens OX=9606	DYNLL1	+	Cluster -803	9.03635	0	28.523	37	2	223	2	89	10.4	7.4		18.4243	18.4513	18.3876	18.0066	18.1642	18.1121	18.8812	18.2492	18.8667	18.074	18.034	17.7169	17.9965	18.0713	18.105	17.8688	17.8549	17.8937	18.1636	18.2253	18.2931	18.2983	18.302	17.9481
	2.18359	-0.329741	0.795679	High	P62906	60S ribosomal protein L10a OS=Homo sapiens OX=9606	RPL10A	+	Cluster -800	10.5479	0	19.17	24	5	235	5	217	24.8	9.94		19.368	19.1824	19.1913	18.9113	18.954	18.8872	18.9418	17.9807	18.3676	18.6876	18.2588	18.1308	18.5334	18.7069	18.6967	19.0835	19.0097	19.1148	20.6161	20.5993	20.6387	18.825	18.7515	18.4262
+	3.04384	-0.331801	0.794544	High	Q9Y3I0	RNA-splicing ligase RtcB homolog OS=Homo sapiens OX=9606	RTCB	+	Cluster -800	6.31757	4.34783e-05	18.985	11	5	169	5	505	55.2	7.23		17.9954	18.0202	18.0971	17.6899	17.6787	17.7486	17.9192	16.7606	17.825	17.6214	17.2313	17.4134	17.751	17.6819	17.6516	17.5537	17.4454	17.5209	18.3607	18.4465	18.4478	17.7958	17.8025	17.4922
	1.43728	-0.332695	0.794052	High	P55735	Protein SEC13 homolog OS=Homo sapiens OX=9606	SEC13	+	Cluster -803	2.4444	0.00164327	4.981	7	2	19	2	322	35.5	5.48		15.7816	15.7387	15.988	15.5808	15.3529	15.5764	15.6365	15.0985	15.6449	15.4561	15.1734	15.2523	15.5587	15.6225	15.521	15.1977	15.3331	15.3135	15.6375	15.5288	15.5821	15.7343	15.5957	15.1361
	1.79504	-0.334586	0.793011	High	P35080	Profilin-2 OS=Homo sapiens OX=9606	PFN2	+	Cluster -803	5.19489	4.50704e-05	14.16	19	2	198	2	140	15	6.99		20.1075	19.929	19.8303	19.602	19.6006	19.6605	20.2527	19.4953	20.0741	19.7584	19.2321	19.7235	19.6547	19.7174	19.7791	19.1473	19.1191	19.1752	19.5658	19.6264	19.6991	19.8456	19.8543	19.5927
	1.25058	-0.337309	0.791517	High	Q96C19	EF-hand domain-containing protein D2 OS=Homo sapiens OX=9606	EFHD2			NaN	NaN	3.792	5	1	26	1	240	26.7	5.2		15.2962	14.9773	15.3416	14.888	14.9492	14.7661	15.2719	14.3596	15.0193	14.8981	14.2421	14.4083	14.9301	15.0884	14.8537	14.789	14.5723	14.6544	14.9322	14.8976	14.8427	15.0304	14.9659	14.4798
	1.34609	-0.339346	0.7904	High	O75369	Filamin-B OS=Homo sapiens OX=9606	FLNB			NaN	NaN	43.897	6	13	313	8	2602	278	5.73		17.7452	17.6171	17.6286	17.5452	17.2054	17.2223	17.5796	15.663	17.6435	16.7785	17.0799	16.7637	17.1492	17.5158	16.9278	16.9377	16.3143	16.4914	17.1515	17.4504	17.1569	17.6279	16.9182	16.9927
	2.38112	-0.340034	0.790022	High	P26373	60S ribosomal protein L13 OS=Homo sapiens OX=9606	RPL13	+	Cluster -800	17.5663	0	30.268	24	5	501	5	211	24.2	11.65		19.5359	19.532	19.4694	19.072	19.1903	19.2549	19.5865	18.8391	19.5497	19.0162	18.8998	18.9481	19.2517	19.3486	19.3528	19.7199	19.7051	19.7683	21.2644	21.2331	21.2806	19.428	19.391	19.0561
	1.65745	-0.340277	0.78989	High	Q9BS26	Endoplasmic reticulum resident protein 44 OS=Homo sapiens OX=9606	ERP44	+	Cluster -803	7.63606	0	25.539	22	7	158	7	406	46.9	5.26		19.6517	19.6037	19.8848	19.3832	19.4278	19.3085	19.0279	18.5798	19.0754	19.7127	19.4009	19.5786	20.1856	20.0895	20.1029	19.4186	19.2612	19.319	19.3628	19.3578	19.4074	19.3727	19.4711	19.1481
	1.1193	-0.342168	0.788855	High	Q16891	MICOS complex subunit MIC60 OS=Homo sapiens OX=9606	IMMT	+	Cluster -803	3.37883	0.000344234	18.208	9	5	151	5	758	83.6	6.48		17.6372	17.5037	17.2567	16.944	17.1908	17.2362	17.4769	16.5143	17.1796	17.1486	16.7896	16.9308	17.2744	17.5477	17.4001	16.8403	16.9564	16.7354	17.2654	17.3473	17.3598	17.4783	17.4056	16.9888
+	2.90996	-0.344196	0.787747	High	Q9P258	Protein RCC2 OS=Homo sapiens OX=9606	RCC2	+	Cluster -803	8.71798	0	45.808	27	11	470	11	522	56	8.78		19.548	19.6102	19.6708	19.2197	19.2874	19.2893	19.7518	19.0651	19.7435	19.54	19.3368	19.2307	19.289	19.5099	19.3961	18.5075	18.6758	18.7709	19.401	19.5335	19.572	19.4283	19.4158	19.153
	2.00375	-0.345113	0.787246	High	Q14956	Transmembrane glycoprotein NMB OS=Homo sapiens OX=9606	GPNMB	+	Cluster -803	3.99935	0.000120968	8.998	8	3	147	3	572	63.9	6.64		19.7387	19.8679	19.6559	19.3251	19.459	19.443	19.6164	18.5701	19.4861	19.1097	18.6583	18.6821	19.2741	19.3571	19.4226	19.0118	19.1069	19.1108	19.2914	19.3659	19.3112	19.4441	19.5222	19.2457
	1.45542	-0.348042	0.78565	High	P15531	Nucleoside diphosphate kinase A OS=Homo sapiens OX=9606	NME1	+	Cluster -803	1.6779	0.00924345	16.392	23	3	250	1	152	17.1	6.19		15.8497	15.8466	15.5631	15.2972	15.4931	15.425	15.3183	15.9562	16.173	15.3243	14.454	14.7192	15.5615	15.4654	15.5168	15.0284	14.9302	14.7116	15.7296	15.3434	15.6198	15.8278	15.6258	16.2258
+	2.85279	-0.350776	0.784162	High	P02545	Prelamin-A/C OS=Homo sapiens OX=9606	LMNA	+	Cluster -803	6.38091	4.47761e-05	129.518	43	24	1354	23	664	74.1	7.02		21.736	21.7172	21.595	21.3415	21.3235	21.3307	21.5749	20.8589	21.524	21.0337	20.798	20.7519	21.1899	21.3262	21.3032	21.1564	21.2307	21.1985	21.1631	21.1257	21.1774	21.1883	21.1095	20.8949
	1.86239	-0.351686	0.783667	High	P51858	Hepatoma-derived growth factor OS=Homo sapiens OX=9606	HDGF	+	Cluster -803	3.70734	0.000180113	8.459	15	2	46	2	240	26.8	4.73		17.2811	17.0427	17.2311	16.7871	16.9169	16.7958	17.1767	16.2962	17.183	16.7742	16.6291	16.7634	16.7896	16.8585	16.9119	16.5419	16.6383	16.7747	16.8842	17.0226	16.9639	17.1649	17.04	16.8852
	0.547803	-0.351962	0.783518	High	P55209	Nucleosome assembly protein 1-like 1 OS=Homo sapiens OX=9606	NAP1L1	+	Cluster -800	7.25731	5.5814e-05	9.935	7	2	45	2	391	45.3	4.46		15.6219	16.1187	16.4122	15.9675	15.7339	15.3956	15.7707	14.8801	15.5419	15.9488	14.9549	15.6618	15.897	15.7858	15.7301	17.9745	17.7606	17.8757	16.1284	16.1848	16.1824	15.7262	15.9638	15.4333
+	3.55334	-0.352125	0.783429	High	Q99714	3-hydroxyacyl-CoA dehydrogenase type-2 OS=Homo sapiens OX=9606	HSD17B10	+	Cluster -803	2.38758	0.00181818	14.015	14	3	121	3	261	26.9	7.78		18.0218	18.0375	17.9842	17.6131	17.6922	17.6819	17.5905	17.231	17.3921	17.4225	17.3187	17.1158	17.6792	17.7705	17.7236	17.2138	17.3749	17.3616	17.7146	17.5975	17.628	17.8866	17.8092	17.4296
	1.66239	-0.352266	0.783353	High	Q9Y383	Putative RNA-binding protein Luc7-like 2 OS=Homo sapiens OX=9606	LUC7L2	+	Cluster -803	6.64384	4.89796e-05	43.91	23	8	453	8	392	46.5	10.01		19.5181	19.7058	19.7266	19.159	19.3507	19.384	19.6068	19.0028	19.6775	19.3326	19.1396	18.9742	19.3794	19.5428	19.4228	18.9487	18.987	19.0619	19.6032	19.4	19.4563	19.7613	19.6062	19.4061
	2.00908	-0.353345	0.782767	High	O15144	Actin-related protein 2/3 complex subunit 2 OS=Homo sapiens OX=9606	ARPC2	+	Cluster -803	2.01363	0.0040425	16.899	17	5	68	5	300	34.3	7.36		18.1298	17.9066	17.9608	17.5737	17.6771	17.6864	17.5146	16.568	17.2346	17.466	17.0677	17.1919	17.4341	17.5484	17.5219	17.2676	17.1285	17.172	16.9046	17.5382	17.4682	17.498	17.5366	17.0743
	1.31043	-0.353615	0.78262	High	P21912	Succinate dehydrogenase [ubiquinone] iron-sulfur subunit, mitochondrial OS=Homo sapiens OX=9606	SDHB	+	Cluster -803	5.55676	3.66972e-05	4.523	7	2	39	2	280	31.6	8.76		16.6706	16.6645	16.6139	16.0502	16.4594	16.3784	16.7435	16.0078	16.5851	16.3646	16.1115	15.9748	16.4003	16.4698	16.4227	15.957	15.8515	15.8325	16.4697	16.458	16.476	16.3361	16.4529	16.0876
	0.264197	-0.355776	0.781449	High	Q9BUF5	Tubulin beta-6 chain OS=Homo sapiens OX=9606	TUBB6	+	Cluster -803	2.10292	0.0033188	81.819	35	11	1695	3	446	49.8	4.88		16.747	17.9195	16.5078	16.3625	16.4145	17.3299	16.8567	17.1826	17.9033	17.4533	17.2954	17.2188	16.0946	17.2733	17.3757	15.8568	16.0582	16.1194	17.3467	17.4535	17.6341	17.4915	17.4728	17.4858
	0.675515	-0.356014	0.78132	High	Q9NQW6	Anillin OS=Homo sapiens OX=9606	ANLN			NaN	NaN	5.753	2	2	31	2	1124	124.1	8.07		15.603	15.8263	16.3906	15.4874	15.6424	15.6221	16.3607	14.0432	16.2477	16.072	15.5733	15.2359	15.7623	15.956	15.8142	15.2493	15.3056	15.1454	15.8891	15.9377	15.8494	16.2384	16.3692	16.1566
+	3.34306	-0.356386	0.781119	High	Q9BW19	Kinesin-like protein KIFC1 OS=Homo sapiens OX=9606	KIFC1	+	Cluster -803	5.9293	3.9604e-05	9.185	6	3	26	3	673	73.7	8.98		18.7199	18.7934	18.7674	18.4467	18.357	18.4078	18.599	17.8296	18.4762	18.1896	18.1491	18.1076	18.1405	18.2817	18.2112	18.0457	17.8482	18.0079	18.3081	18.2623	18.2553	18.5039	18.4413	18.2099
	1.17765	-0.356823	0.780882	High	Q86X55	Histone-arginine methyltransferase CARM1 OS=Homo sapiens OX=9606	CARM1	+	Cluster -803	2.40769	0.00172093	10.484	7	4	37	4	608	65.8	6.73		17.3124	17.4212	17.1585	16.7036	17.0224	17.0957	17.0511	16.1813	16.9485	16.563	16.7615	16.8515	16.977	17.1444	17.046	16.7596	16.7694	16.7292	17.0846	17.0405	16.9262	17.3238	17.302	16.855
	0.917554	-0.357112	0.780726	High	Q93009	Ubiquitin carboxyl-terminal hydrolase 7 OS=Homo sapiens OX=9606	USP7	+	Cluster -803	2.23848	0.00248122	4.058	2	2	8	2	1102	128.2	5.55		15.1581	15.6909	15.4428	14.9529	15.2646	15.0029	14.8033	13.2394	14.6195	14.8368	14.3227	14.7775	14.7466	15.0444	15.1843	14.819	14.7171	14.9944	15.1433	15.1002	15.1164	15.3531	15.1168	14.9318
	1.22543	-0.359779	0.779284	High	Q15365	Poly(rC)-binding protein 1 OS=Homo sapiens OX=9606	PCBP1	+	Cluster -803	8.53443	0	67.216	47	9	602	7	356	37.5	7.09		19.7409	20.1702	19.9459	19.4813	19.6074	19.689	20.352	19.687	20.3736	19.8809	19.8014	19.6596	19.7658	20.0263	19.9553	19.2059	19.0537	19.2939	20.1239	20.1514	20.1592	20.1083	20.1625	19.7819
	0.730113	-0.360154	0.779082	High	Q13630	GDP-L-fucose synthase OS=Homo sapiens OX=9606	GFUS			NaN	NaN	2.924	3	1	3	1	321	35.9	6.6		17.0923	16.3438	16.5508	16.3711	16.2814	16.254	16.2839	16.2579	16.6827	16.2578	15.7274	15.6846	16.5105	16.5751	16.424	16.2054	16.268	16.2151	16.4023	16.3815	16.3375	16.4798	16.1149	16.4927
	2.26214	-0.361095	0.778574	High	Q8NE71	ATP-binding cassette sub-family F member 1 OS=Homo sapiens OX=9606	ABCF1	+	Cluster -803	8.53907	0	33.765	13	9	252	9	845	95.9	6.8		18.5647	18.761	18.6785	18.2451	18.3149	18.3608	18.7217	17.8538	18.5867	18.3412	18.2386	18.1721	18.3774	18.3699	18.4558	17.9099	17.8492	17.9663	18.4546	18.3881	18.4067	18.5623	18.5358	18.0687
	2.03286	-0.361666	0.778265	High	P20592	Interferon-induced GTP-binding protein Mx2 OS=Homo sapiens OX=9606	MX2	+	Cluster -803	4.85094	4.96278e-05	66.482	24	15	463	12	715	82	8.76		19.5208	19.5485	19.5895	19.0429	19.2632	19.2678	19.0303	18.5214	18.9854	19.5939	19.4424	19.3486	19.4561	19.5736	19.604	18.8794	19.0489	18.3685	19.8348	19.8292	19.7651	19.6819	19.2542	19.0778
	2.32637	-0.365264	0.776327	High	Q01813	ATP-dependent 6-phosphofructokinase, platelet type OS=Homo sapiens OX=9606	PFKP	+	Cluster -803	7.14677	5.40541e-05	55.422	24	14	459	14	784	85.5	7.55		20.5192	20.4093	20.3144	20.0223	20.026	20.0988	20.4714	19.783	20.6733	20.4571	19.967	20.08	20.2192	20.5356	20.4536	19.6783	19.5289	19.68	20.5679	20.5958	20.5859	20.6637	20.3798	20.2719
+	2.80268	-0.366115	0.775869	High	Q92841	Probable ATP-dependent RNA helicase DDX17 OS=Homo sapiens OX=9606	DDX17	+	Cluster -803	7.96971	0	104.642	36	22	1654	15	729	80.2	8.27		21.0179	20.9693	20.9192	20.5257	20.6401	20.6423	20.6474	19.7643	20.5367	20.2655	20.0296	20.0329	20.213	20.3319	20.249	19.9056	19.935	19.9297	20.3613	20.4596	20.408	20.5771	20.5391	20.3277
+	2.94299	-0.366351	0.775742	High	P62424	60S ribosomal protein L7a OS=Homo sapiens OX=9606	RPL7A	+	Cluster -800	15.3626	0	32.358	22	7	476	7	266	30	10.61		20.0549	20.1577	20.0967	19.7834	19.6746	19.7523	19.9469	19.1724	19.9411	19.5183	19.3093	19.4432	19.6383	19.7653	19.7349	20.1183	20.1298	20.179	21.6216	21.5766	21.6066	19.7581	19.7269	19.4446
	0.358551	-0.367894	0.774913	High	P13674	Prolyl 4-hydroxylase subunit alpha-1 OS=Homo sapiens OX=9606	P4HA1			NaN	NaN	8.064	4	2	51	2	534	61	6.01		15.3712	15.6587	16.3431	15.522	14.8337	15.9136	15.6653	15.04	15.6632	15.2601	14.9906	14.9632	15.7344	15.8422	15.8793	15.8025	15.6903	15.9108	15.534	15.7726	15.7119	15.8005	15.9198	15.698
	1.75304	-0.368303	0.774693	High	P27482	Calmodulin-like protein 3 OS=Homo sapiens OX=9606	CALML3	+	Cluster -801	6.47033	4.65116e-05	25.031	35	5	122	5	149	16.9	4.42		18.2423	18.4364	18.1916	18.0348	17.8409	17.8898	17.3541	15.9212	16.9646	17.1956	16.6686	16.6614	16.8444	16.8223	16.851	17.0233	17.0543	16.9808	17.0315	16.8869	16.9069	17.0385	16.9854	16.472
	0.928185	-0.368502	0.774587	High	Q16778	Histone H2B type 2-E OS=Homo sapiens OX=9606	H2BC21	+	Cluster -800	6.35669	4.44444e-05	14.221	23	3	151	1	126	13.9	10.32		16.6366	16.4551	17.0543	16.2918	16.293	16.4557	17.2332	16.6185	17.1093	15.9247	16.2245	16.0906	16.4567	16.5727	16.5253	17.2594	17.253	17.4396	16.3879	16.5509	16.4866	16.8487	16.7112	16.4609
	1.6801	-0.369972	0.773798	High	P07996	Thrombospondin-1 OS=Homo sapiens OX=9606	THBS1	+	Cluster -803	2.13707	0.00314286	6.337	3	2	21	2	1170	129.3	4.94		15.3441	15.0246	15.0791	14.7594	14.7661	14.8124	14.9737	14.6248	14.9405	14.5929	14.3263	13.9809	15.01	15.0556	15.4787	14.9204	14.4175	14.7291	14.6788	14.9437	15.0706	14.9115	15.3303	14.9152
	2.48906	-0.371021	0.773235	High	Q06830	Peroxiredoxin-1 OS=Homo sapiens OX=9606	PRDX1	+	Cluster -803	6.29219	4.31655e-05	112.655	66	11	2174	9	199	22.1	8.13		23.5561	23.6163	23.7364	23.2195	23.2679	23.3083	23.7025	22.7572	23.5069	23.2131	23.0388	23.0561	23.2579	23.3975	23.3605	22.8669	22.8707	22.9021	23.3083	23.3689	23.3433	23.29	23.2564	22.7969
+	3.48979	-0.3715	0.772978	High	P52630	Signal transducer and activator of transcription 2 OS=Homo sapiens OX=9606	STAT2	+	Cluster -803	7.27798	5.6338e-05	17.492	9	6	95	6	851	97.9	5.49		17.7074	17.7957	17.7477	17.373	17.4154	17.348	17.6864	16.5193	17.3723	17.5089	17.5508	17.442	17.2399	17.3304	17.4298	16.6372	16.4763	16.644	17.4568	17.5688	17.5843	17.4465	17.4199	17.1549
	2.23293	-0.374455	0.771397	High	Q8IVU3	Probable E3 ubiquitin-protein ligase HERC6 OS=Homo sapiens OX=9606	HERC6	+	Cluster -803	5.91661	3.8961e-05	3.803	2	1	15	1	1022	115.1	7.96		14.4601	14.351	14.2679	13.9645	13.9247	14.0665	14.4539	13.4831	14.2006	14.1961	14.2811	14.3403	14.0605	14.2536	14.0966	13.1468	12.2847	13.0255	14.2841	14.548	14.259	14.4116	14.2316	13.8463
	0.360601	-0.375116	0.771043	High	Q9H299	SH3 domain-binding glutamic acid-rich-like protein 3 OS=Homo sapiens OX=9606	SH3BGRL3			NaN	NaN	2.632	11	1	10	1	93	10.4	4.93		16.1912	16.5107	17.1344	15.5998	16.3832	16.728	15.8195	13.5843	15.5156	15.9805	16.2445	12.4953	15.722	11.8782	13.0077	11.9395	13.2743	13.5262	15.3057	12.9881	15.6952	12.9156	15.9257	13.748
	0.516827	-0.375214	0.770991	High	P27816	Microtubule-associated protein 4 OS=Homo sapiens OX=9606	MAP4	+	Cluster -803	3.05391	0.000480519	23.14	8	8	101	8	1152	120.9	5.43		18.3381	17.5264	17.8652	17.9621	17.2855	17.3564	18.9417	18.0886	18.7795	17.3208	17.079	17.271	17.2295	17.4846	17.3538	17.1951	16.9691	17.2869	17.253	17.4659	17.2815	17.0264	16.985	17.8429
	0.527603	-0.37709	0.769989	High	Q9H2D6	TRIO and F-actin-binding protein OS=Homo sapiens OX=9606	TRIOBP			NaN	NaN	4.236	1	2	11	2	2365	261.2	8.48		14.5176	15.4575	15.1933	14.4699	14.6132	14.954	15.1209	14.2393	15.1834	15.231	14.751	14.6321	15.287	15.2536	14.8264	14.7588	14.9296	14.5973	14.7806	13.4482	15.1187	14.9803	15.202	14.7458
+	3.35786	-0.377116	0.769975	High	Q8WX93	Palladin OS=Homo sapiens OX=9606	PALLD	+	Cluster -803	11.581	0	215.363	33	33	2102	33	1383	150.5	7.09		22.8755	22.8276	22.8475	22.4303	22.452	22.537	23.1537	22.4968	23.2084	22.7119	22.422	22.3508	22.3916	22.6394	22.5311	21.9774	21.9071	22.0112	22.7233	22.7036	22.7245	22.9732	22.9207	22.7182
	0.539669	-0.378063	0.76947	High	P07195	L-lactate dehydrogenase B chain OS=Homo sapiens OX=9606	LDHB			NaN	NaN	21.869	16	4	147	3	334	36.6	6.05		17.1108	17.9489	17.8298	17.4458	17.3852	16.9243	17.4885	17.0555	17.3918	17.2242	16.9673	17.2172	17.1178	17.2314	17.0023	17.0947	17.0362	16.9567	17.0423	16.8923	16.9052	16.8677	16.8958	16.7577
	1.3361	-0.379238	0.768843	High	P0CG39	POTE ankyrin domain family member J OS=Homo sapiens OX=9606	POTEJ	+	Cluster -800	6.18745	4.16667e-05	39.051	6	5	1178	2	1038	117.3	5.97		16.0332	15.8678	16.2997	15.7475	15.6054	15.7102	15.3404	14.0798	14.8729	15.342	15.2316	15.4231	15.3408	15.39	15.1613	16.1021	16.1281	16.0319	15.8394	15.7264	15.7693	16.2103	16.2518	15.7043
+	2.68389	-0.379254	0.768835	High	Q9ULA0	Aspartyl aminopeptidase OS=Homo sapiens OX=9606	DNPEP	+	Cluster -803	7.97694	0	42.78	26	9	492	9	485	53.4	7.58		21.2225	21.0495	21.1186	20.7176	20.7561	20.779	21.1867	20.3339	21.0255	20.8867	20.8604	20.6028	20.7737	20.9072	20.8543	20.2504	20.1354	20.0928	20.9441	21.0187	21.014	21.0191	21.0203	20.5875
	1.25605	-0.380466	0.76819	High	P43304	Glycerol-3-phosphate dehydrogenase, mitochondrial OS=Homo sapiens OX=9606	GPD2	+	Cluster -803	4.34418	7.07965e-05	10.039	6	4	74	4	727	80.8	7.69		17.6702	17.9498	18.0211	17.3507	17.4767	17.6722	17.5903	17.1731	17.6333	17.6465	17.7	17.3718	17.5942	17.9834	17.6583	17.3501	17.4478	17.4336	17.9922	18.0608	18.1336	18.1673	18.0827	17.7421
	2.23053	-0.380768	0.768028	High	P25205	DNA replication licensing factor MCM3 OS=Homo sapiens OX=9606	MCM3	+	Cluster -803	5.01928	5.26316e-05	97.407	33	25	1106	25	808	90.9	5.77		21.4663	21.614	21.5348	21.0959	21.1056	21.2714	21.4589	20.8612	21.3435	21.0619	20.8324	20.7841	21.1856	21.3781	21.2941	20.7607	20.726	20.7996	21.0247	21.1942	21.2569	21.3232	21.3314	21.2278
	0.557383	-0.3812	0.767799	High	Q9UPW5	Cytosolic carboxypeptidase 1 OS=Homo sapiens OX=9606	AGTPBP1	+	Cluster -803	2.19096	0.00272376	2.981	2	1	10	1	1226	138.4	6.15		20.1055	20.5105	20.5475	19.4845	20.1617	20.3737	21.1649	20.3191	21.1435	20.7407	19.5724	19.4464	19.9686	20.6277	20.289	19.9896	19.9829	20.4262	20.2148	20.3243	20.2361	20.1021	20.0142	19.5747
	1.05079	-0.382335	0.767195	High	P06493	Cyclin-dependent kinase 1 OS=Homo sapiens OX=9606	CDK1			NaN	NaN	5.244	7	2	79	1	297	34.1	8.4		14.6201	14.0728	14.4025	13.8592	14.0274	14.0618	14.3564	13.9678	14.3281	14.0341	13.4863	13.4742	14.066	13.974	14.0784	14.1723	13.9168	14.0625	12.8434	14.2387	14.6856	14.2193	14.6497	14.6219
	1.83879	-0.383436	0.76661	High	P62195	26S proteasome regulatory subunit 8 OS=Homo sapiens OX=9606	PSMC5			NaN	NaN	5.414	6	2	14	2	406	45.6	7.55		17.1242	17.0167	16.8554	16.6337	16.6915	16.5207	16.9834	16.4268	16.8639	16.8351	16.872	16.305	16.6403	16.7284	16.7503	16.2124	16.0516	13.9853	14.6365	13.9955	16.8085	14.0089	14.2655	16.5783
	1.80695	-0.384286	0.766158	High	P50991	T-complex protein 1 subunit delta OS=Homo sapiens OX=9606	CCT4			NaN	NaN	9.548	6	3	60	3	539	57.9	7.83		17.1534	17.2026	17.267	16.9634	16.6575	16.8492	16.8211	16.2654	16.7565	16.4675	16.5249	16.2338	16.6315	16.7147	16.5737	16.4871	16.4877	16.4269	16.7888	16.6066	16.6473	16.8152	16.6509	16.4218
	1.85361	-0.384754	0.76591	High	Q92973	Transportin-1 OS=Homo sapiens OX=9606	TNPO1	+	Cluster -803	5.56107	3.68098e-05	16.644	6	4	173	4	898	102.3	4.98		17.1442	17.3454	17.44	16.9823	16.9118	16.8811	17.253	16.4654	17.2674	17.253	16.7589	16.7969	17.1682	17.3461	17.3101	17.0243	16.8663	17.1835	17.3362	17.3699	17.4399	17.5169	17.5415	17.129
+	2.90164	-0.385094	0.765729	High	P62269	40S ribosomal protein S18 OS=Homo sapiens OX=9606	RPS18	+	Cluster -800	8.79307	0	11.783	18	3	226	3	152	17.7	10.99		19.5876	19.5784	19.4421	19.1412	19.1626	19.149	19.2683	18.4137	19.1704	19.033	18.5553	18.6606	18.8828	18.9939	19.006	20.0764	20.0273	20.0225	19.8579	19.7084	19.7283	19.0461	18.8155	18.9665
	1.35003	-0.385991	0.765253	High	O43290	U4/U6.U5 tri-snRNP-associated protein 1 OS=Homo sapiens OX=9606	SART1	+	Cluster -803	3.32454	0.000374787	21.532	11	6	84	6	800	90.2	6.13		17.6711	17.9554	17.6367	17.3122	17.2528	17.5401	17.2881	16.1455	17.2663	17.7627	17.1011	16.7411	17.518	17.7555	17.6719	17.1836	16.6931	16.7078	17.9448	17.9782	17.845	17.925	17.5238	17.2628
	1.74176	-0.387976	0.764201	High	P33992	DNA replication licensing factor MCM5 OS=Homo sapiens OX=9606	MCM5	+	Cluster -803	4.49707	6.45161e-05	106.795	30	16	1051	16	734	82.2	8.37	Met-loss+Acetyl [N-Term]	21.4051	21.143	21.1235	20.7644	20.8302	20.9131	21.1064	20.397	21.0394	20.8027	20.5953	20.5868	20.8669	21.0587	20.9601	20.6233	20.5039	20.6727	20.991	21.0329	21.0649	21.0678	21.0079	20.7582
	0.976109	-0.388613	0.763864	High	Q16527	Cysteine and glycine-rich protein 2 OS=Homo sapiens OX=9606	CSRP2	+	Cluster -803	7.39439	5.7971e-05	55.722	46	7	452	7	193	20.9	8.62		20.6362	20.7998	20.4186	20.0115	20.518	20.1593	21.9122	21.0273	21.6553	20.985	20.768	20.8984	21.1727	21.5723	21.6498	20.4464	20.3415	20.0118	21.0927	21.1591	21.3351	21.5417	21.4938	20.8352
	0.664123	-0.390519	0.762855	High	Q16851	UTP--glucose-1-phosphate uridylyltransferase OS=Homo sapiens OX=9606	UGP2			NaN	NaN	8.014	7	3	48	3	508	56.9	8.15		17.0824	17.2957	16.5219	16.8216	16.363	16.5438	17.0077	15.3122	16.6645	16.3689	17.0821	16.3273	16.8708	17.4525	16.4612	16.9437	16.3706	17.1598	17.2785	16.7951	16.8694	16.8696	16.7678	16.4279
	1.61071	-0.391155	0.762519	High	Q9Y6K5	2'-5'-oligoadenylate synthase 3 OS=Homo sapiens OX=9606	OAS3	+	Cluster -803	8.37966	0	37.292	12	13	370	13	1087	121.1	8.4	Acetyl [N-Term]	18.6691	18.902	18.6433	18.2075	18.3696	18.4638	18.7351	18.4008	18.8318	18.7857	18.4751	18.4868	18.5657	18.6715	18.6477	17.4854	17.4247	17.5256	18.8437	18.8877	18.9438	18.7361	18.8184	18.724
	2.27417	-0.392797	0.761652	High	P10321	HLA class I histocompatibility antigen, C alpha chain OS=Homo sapiens OX=9606	HLA-C	+	Cluster -803	4.89948	5.10204e-05	21.9	13	3	202	1	366	40.6	6.04		18.5407	18.6442	18.7648	18.1978	18.2949	18.2786	18.2503	17.6427	18.1604	18.2743	18.2883	18.2708	18.3869	18.6337	18.5047	18.1873	18.1568	18.3107	18.4531	18.4842	18.5062	18.5521	18.5662	18.2568
	2.02278	-0.394625	0.760687	High	O75348	V-type proton ATPase subunit G 1 OS=Homo sapiens OX=9606	ATP6V1G1			NaN	NaN	4.387	9	1	24	1	118	13.7	8.79		14.8313	14.7162	14.9948	14.4799	14.4744	14.4041	14.4651	13.1675	14.2536	13.8588	13.4246	13.6125	13.9711	14.2991	12.6057	14.0662	13.6412	13.9118	14.1761	14.2046	14.4078	14.6285	14.2085	13.7717
	1.17432	-0.397258	0.7593	High	P22830	Ferrochelatase, mitochondrial OS=Homo sapiens OX=9606	FECH	+	Cluster -803	3.20457	0.000420701	3.686	3	1	14	1	423	47.8	8.73		14.9948	14.4529	14.7989	14.3236	14.3646	14.3667	14.6171	13.9276	14.5357	14.4261	14.3606	14.2844	14.5527	14.4804	14.6916	14.0467	13.9923	14.1414	14.4726	14.549	14.3095	14.7501	14.4859	14.4942
	1.84875	-0.397565	0.759139	High	O95336	6-phosphogluconolactonase OS=Homo sapiens OX=9606	PGLS	+	Cluster -803	6.6324	4.8583e-05	8.937	14	3	32	3	258	27.5	6.05		16.0036	15.8606	15.8061	15.4784	15.3697	15.6295	16.3001	15.612	16.2414	15.7925	15.7077	15.3647	15.5774	15.5976	15.6163	14.874	15.1142	15.1838	15.7002	15.4251	15.7063	15.8305	15.6879	15.2668
	0.438243	-0.397595	0.759123	High	Q9Y6W5	Actin-binding protein WASF2 OS=Homo sapiens OX=9606	WASF2	+	Cluster -803	2.65312	0.00100457	6.923	5	2	48	2	498	54.3	5.53		15.7113	16.1832	15.3573	15.0118	15.082	15.9652	16.2987	15.6031	16.343	15.8401	15.2841	15.5334	15.2899	15.8052	15.7537	14.7434	14.9838	15.2938	15.7168	15.77	15.8729	15.6793	15.9332	15.4773
	1.94754	-0.39956	0.758089	High	Q92499	ATP-dependent RNA helicase DDX1 OS=Homo sapiens OX=9606	DDX1	+	Cluster -803	6.48572	4.66926e-05	20.104	9	6	147	6	740	82.4	7.23		18.7464	18.647	18.9222	18.294	18.4262	18.3967	18.7867	17.8902	18.6694	18.3914	18.092	18.2869	18.2987	18.4811	18.3997	17.8581	17.8611	17.9803	18.8393	18.8604	18.8347	18.4148	18.4241	18.0959
	1.69129	-0.399644	0.758045	High	Q16181	Septin-7 OS=Homo sapiens OX=9606	SEPTIN7			NaN	NaN	10.321	7	3	96	3	437	50.6	8.63		16.8815	16.568	16.8337	16.2723	16.4091	16.403	16.4028	14.5109	16.2738	16.355	15.9217	15.919	16.3999	16.4352	16.523	16.374	16.3174	16.2621	16.3599	16.3397	16.4011	16.3696	16.4703	15.9504
	0.552185	-0.40304	0.756263	High	P09429	High mobility group protein B1 OS=Homo sapiens OX=9606	HMGB1			NaN	NaN	5.844	12	2	31	2	215	24.9	5.74		17.0743	16.1033	16.1442	15.9128	16.1099	16.09	16.2281	15.7013	16.2203	16.1079	15.4025	15.1582	16.2104	16.3188	16.5085	16.2802	16.2458	16.19	16.314	16.4509	16.4757	16.3738	16.3493	16.176
	1.59379	-0.403621	0.755959	High	Q15427	Splicing factor 3B subunit 4 OS=Homo sapiens OX=9606	SF3B4	+	Cluster -803	1.9105	0.00522597	3.175	3	1	11	1	424	44.4	8.56		15.6844	15.567	15.5713	15.0354	15.4096	15.1668	15.49	14.6987	15.3554	15.4535	15.3746	14.9232	14.9694	15.4926	15.2322	15.1075	15.0438	15.0722	15.2686	15.5802	15.5675	15.5534	15.4347	15.2234
	0.909152	-0.404303	0.755601	High	Q13404	Ubiquitin-conjugating enzyme E2 variant 1 OS=Homo sapiens OX=9606	UBE2V1			NaN	NaN	2.997	7	1	3	1	147	16.5	7.93		15.4927	15.677	14.984	14.975	14.9633	15.0025	14.74	13.4916	14.5309	14.3147	14.582	14.0338	14.6698	14.7525	14.6666	14.685	14.5102	14.5926	14.8563	14.6387	14.6261	14.5529	14.868	14.0165
	1.97705	-0.405242	0.755109	High	Q9NX63	MICOS complex subunit MIC19 OS=Homo sapiens OX=9606	CHCHD3	+	Cluster -803	2.08002	0.00350678	8.933	8	2	89	2	227	26.1	8.28		17.4113	17.1284	17.2165	16.808	16.8229	16.9096	16.915	15.715	16.7462	16.6513	16.212	16.323	16.921	17.0702	16.8939	16.5872	16.4032	16.5424	16.7308	16.7805	16.8397	16.8513	16.7869	16.162
	2.11575	-0.405248	0.755106	High	Q14974	Importin subunit beta-1 OS=Homo sapiens OX=9606	KPNB1			NaN	NaN	5.229	2	2	70	2	876	97.1	4.78		16.5773	16.717	16.7056	16.136	16.2778	16.3704	15.9251	15.4965	16.4479	15.9619	15.8908	16.3737	16.5017	16.2643	16.5314	16.2821	16.1903	16.4445	16.6185	16.717	16.4979	16.3566	16.3655	16.1713
	1.68811	-0.406902	0.754241	High	Q13451	Peptidyl-prolyl cis-trans isomerase FKBP5 OS=Homo sapiens OX=9606	FKBP5			NaN	NaN	5.695	4	2	40	2	457	51.2	5.9		16.2689	15.9468	15.9577	15.606	15.7045	15.6423	15.9983	15.4907	16.5019	15.7922	15.017	13.7067	15.9338	15.5627	15.5939	15.0482	13.986	15.0146	15.4695	15.2673	15.416	15.5053	15.4503	15.6237
	0.924134	-0.410106	0.752568	High	P09661	U2 small nuclear ribonucleoprotein A' OS=Homo sapiens OX=9606	SNRPA1	+	Cluster -800	2.36452	0.00189986	2.596	4	1	5	1	255	28.4	8.62		14.4259	13.7641	14.2288	13.8092	13.5961	13.7832	13.9909	13.0816	13.8672	13.6283	13.6304	13.0009	13.8532	14.1612	14.2053	14.1359	14.1832	14.2035	13.9517	14.1031	14.3804	14.1949	14.1764	13.6059
	2.21015	-0.412786	0.751171	High	P16615	Sarcoplasmic/endoplasmic reticulum calcium ATPase 2 OS=Homo sapiens OX=9606	ATP2A2			NaN	NaN	10.54	4	4	72	4	1042	114.7	5.34		17.4085	17.4119	17.592	16.97	17.1408	17.0632	17.1149	16.2245	17.2004	16.9215	16.6108	16.4805	17.0474	17.3041	17.1354	16.8697	16.9132	16.5562	16.8861	17.1609	17.0803	17.1619	17.2028	16.6997
	2.13822	-0.41351	0.750795	High	P60660	Myosin light polypeptide 6 OS=Homo sapiens OX=9606	MYL6	+	Cluster -803	4.19824	9.22432e-05	35.189	38	5	617	5	151	16.9	4.65		21.2951	21.0221	21.1627	20.7184	20.7295	20.7915	21.2691	20.4768	21.1133	20.8538	20.3562	20.4451	20.7453	20.8558	20.8246	20.6344	20.6313	20.6527	20.9364	21.0058	20.9846	20.9912	20.955	20.7321
	1.91984	-0.414964	0.750038	High	Q8N983	39S ribosomal protein L43, mitochondrial OS=Homo sapiens OX=9606	MRPL43	+	Cluster -800	2.72806	0.000860681	2.825	5	1	5	1	215	23.4	8.65		14.4924	14.2943	14.1929	13.9802	13.8573	13.8972	13.9082	13.18	13.6914	12.1385	13.0043	12.3081	14.7212	12.4404	12.3463	16.1268	16.0595	15.9677	13.6063	12.482	14.2259	14.2773	12.1617	13.8788
	1.47395	-0.417713	0.748611	High	P14314	Glucosidase 2 subunit beta OS=Homo sapiens OX=9606	PRKCSH	+	Cluster -803	6.73005	4.97925e-05	17.49	16	5	35	5	528	59.4	4.41		19.4951	19.8639	19.8921	19.2726	19.3669	19.3586	20.4348	20.0437	20.4785	19.6603	19.8533	19.7327	19.8411	20.0728	20.0055	19.9367	19.9719	19.9278	20.0038	20.0863	20.0918	20.0714	20.0579	19.9219
+	3.07685	-0.41876	0.748067	High	P14618	Pyruvate kinase PKM OS=Homo sapiens OX=9606	PKM	+	Cluster -803	4.33707	7.04846e-05	210.382	54	25	2908	25	531	57.9	7.84		23.8292	23.9674	23.9622	23.4798	23.5135	23.509	23.7799	23.007	23.7714	23.4444	23.3142	23.2992	23.4958	23.6628	23.6067	23.4326	23.4065	23.4638	23.6495	23.6393	23.6748	23.617	23.6175	23.4742
	2.10874	-0.418969	0.747959	High	P61247	40S ribosomal protein S3a OS=Homo sapiens OX=9606	RPS3A	+	Cluster -800	8.02237	0	37.712	28	8	222	8	264	29.9	9.73		19.8606	19.8374	19.6951	19.3416	19.2856	19.509	19.5092	18.8701	19.52	19.1477	19.0031	19.0561	19.2532	19.3043	19.2457	20.0701	20.1203	20.0039	20.4134	20.3519	20.5936	19.0413	18.9599	19.1472
	1.93873	-0.42019	0.747326	High	P62244	40S ribosomal protein S15a OS=Homo sapiens OX=9606	RPS15A	+	Cluster -801	12.4608	0	9.304	18	2	182	2	130	14.8	10.13		18.0262	18.3242	18.2858	17.7613	17.7952	17.819	16.6099	15.8522	16.5123	17.4813	17.4118	17.421	17.4249	17.5047	17.4764	17.8745	17.898	17.9237	18.3284	18.3674	18.3691	17.4048	17.4837	17.1787
	1.33549	-0.421475	0.746661	High	P34931	Heat shock 70 kDa protein 1-like OS=Homo sapiens OX=9606	HSPA1L	+	Cluster -803	2.70418	0.000921659	54.715	19	8	988	1	641	70.3	6.02		16.0374	16.2215	15.7229	15.5274	15.5778	15.6122	15.4255	14.7303	15.519	15.5922	15.4223	15.3491	15.6869	15.8231	15.8998	15.5405	15.6171	15.932	15.734	15.8554	15.7898	15.9117	15.7554	15.2043
	1.87564	-0.422272	0.746248	High	Q8WUM4	Programmed cell death 6-interacting protein OS=Homo sapiens OX=9606	PDCD6IP	+	Cluster -803	4.27476	6.86695e-05	18.678	9	6	82	6	868	96	6.52		17.6235	17.4396	17.4838	17.2058	16.9317	17.1426	17.4742	16.537	17.3253	16.9781	16.604	17.0225	17.0631	17.1023	17.1551	16.4819	16.3651	16.3762	17.1006	17.1081	17.1661	17.1178	16.9817	16.5845
	0.359151	-0.424061	0.745324	High	P30837	Aldehyde dehydrogenase X, mitochondrial OS=Homo sapiens OX=9606	ALDH1B1			NaN	NaN	3.335	2	1	3	1	517	57.2	6.99		14.1313	13.5167	13.8536	14.3248	13.0125	12.8921	15.1447	9.58993	12.2698	15.7407	14.2598	12.3963	14.0522	13.0675	14.9462	13.363	12.2744	11.4124	15.099	14.6538	13.5592	15.3275	14.8896	12.471
+	2.79725	-0.424488	0.745103	High	P62277	40S ribosomal protein S13 OS=Homo sapiens OX=9606	RPS13	+	Cluster -800	8.82137	0	23.376	25	4	241	4	151	17.2	10.54		19.6107	19.5021	19.605	19.1337	19.229	19.0817	19.1926	18.6269	19.2748	19.1301	18.9492	18.9559	19.0569	19.2583	19.1082	19.5487	19.4199	19.5489	20.1834	20.0682	20.0369	19.1448	19.0361	18.7479
	2.25111	-0.424749	0.744968	High	Q00610	Clathrin heavy chain 1 OS=Homo sapiens OX=9606	CLTC	+	Cluster -803	5.93426	3.97351e-05	106.866	19	24	751	24	1675	191.5	5.69		20.3827	20.5189	20.4565	19.9014	20.0494	20.133	20.3771	19.563	20.1964	20.0078	19.9421	19.8234	20.1689	20.3174	20.2969	19.7764	19.8594	19.8719	20.119	20.1441	20.2335	20.3203	20.2219	20.0691
	1.09807	-0.425804	0.744424	High	Q9Y305	Acyl-coenzyme A thioesterase 9, mitochondrial OS=Homo sapiens OX=9606	ACOT9	+	Cluster -803	2.63308	0.00105008	11.451	12	4	71	4	439	49.9	8.6		17.1242	17.4021	17.0022	16.8369	16.4788	16.9354	16.5838	15.7495	16.7756	16.6163	16.5773	16.7235	16.9779	17.1071	16.98	16.6536	16.5981	17.0204	17.4027	17.1134	17.227	17.035	17.1102	16.5264
	1.43596	-0.425824	0.744413	High	P49585	Choline-phosphate cytidylyltransferase A OS=Homo sapiens OX=9606	PCYT1A			NaN	NaN	8.842	9	3	81	3	367	41.7	7.25		18.1146	17.8424	17.7172	17.5765	17.3292	17.491	19.425	16.5713	17.4672	17.611	17.0814	17.184	17.5962	17.745	17.6852	17.7042	17.6256	17.7084	17.4033	17.4549	17.4493	17.5929	17.4898	17.22
	2.25216	-0.427111	0.74375	High	Q9UBS4	DnaJ homolog subfamily B member 11 OS=Homo sapiens OX=9606	DNAJB11	+	Cluster -800	2.10438	0.00331787	3.281	3	1	94	1	358	40.5	6.18		15.8819	15.6839	15.6261	15.3057	15.2781	15.3267	15.5768	14.6741	15.4837	15.1763	15.4009	14.8401	15.4194	15.3857	15.3345	15.4234	15.3407	15.5561	15.4101	15.5172	15.3339	15.7383	15.4757	15.4054
	1.36727	-0.428818	0.74287	High	Q9BSD7	Cancer-related nucleoside-triphosphatase OS=Homo sapiens OX=9606	NTPCR	+	Cluster -803	11.4442	0	3.252	8	1	20	1	190	20.7	9.54		14.4798	14.7572	14.7245	14.4257	14.2304	14.0189	14.8616	14.1773	14.7925	14.5585	14.1706	14.3733	14.0827	14.3913	14.5799	11.8214	11.9012	11.863	14.0803	14.2201	14.1435	14.6553	14.7649	14.4256
	0.383942	-0.43154	0.74147	High	Q00796	Sorbitol dehydrogenase OS=Homo sapiens OX=9606	SORD	+	Cluster -801	1.64758	0.00998015	4.832	6	1	5	1	357	38.3	7.97	Met-loss+Acetyl [N-Term]	13.3634	13.6663	14.6254	12.8918	13.718	13.7507	13.139	12.8822	12.8609	11.8052	12.4674	11.822	13.5235	13.0317	14.3092	12.9462	13.2821	12.4499	12.6004	12.4877	12.1321	13.182	12.3856	12.9939
+	3.52746	-0.432929	0.740756	High	P07237	Protein disulfide-isomerase OS=Homo sapiens OX=9606	P4HB	+	Cluster -803	3.10588	0.000448845	79.345	40	17	794	17	508	57.1	4.87		21.374	21.3832	21.4298	20.8986	20.9861	21.0034	21.1857	20.4336	21.1357	20.9124	20.6361	20.6802	20.8723	21.0924	20.9239	20.866	20.8235	20.8485	20.9935	21.0186	21.0089	21.0789	21.0028	20.9314
	1.6314	-0.433218	0.740608	High	P08240	Signal recognition particle receptor subunit alpha OS=Homo sapiens OX=9606	SRPRA	+	Cluster -803	7.18158	5.45455e-05	7.203	5	2	19	2	638	69.8	8.95		16.0132	16.3234	16.1546	15.7095	15.6006	15.8814	16.3024	15.6162	16.2128	15.8384	15.6616	15.5078	15.883	16.0622	16.0411	15.3345	15.3348	15.1438	15.8143	16.0236	15.8679	16.3971	16.3109	16.2069
	2.16079	-0.434305	0.74005	High	P50914	60S ribosomal protein L14 OS=Homo sapiens OX=9606	RPL14	+	Cluster -800	13.6007	0	17.801	15	3	180	3	215	23.4	10.93		18.8681	18.6976	18.6711	18.2153	18.3021	18.4166	18.4762	17.7458	18.4439	18.1884	17.6922	17.6678	18.3384	18.4147	18.4031	18.7474	18.6181	18.6637	20.2	20.1492	20.1119	18.4147	18.2867	18.063
	2.00763	-0.43431	0.740048	High	P84090	Enhancer of rudimentary homolog OS=Homo sapiens OX=9606	ERH	+	Cluster -800	8.94275	0	6.863	12	1	101	1	104	12.3	5.92	Met-loss+Acetyl [N-Term]	16.855	16.6674	16.5454	16.2026	16.2738	16.2885	16.8472	16.1232	16.753	15.9799	16.0059	15.5726	16.3153	16.3157	16.3	17.2182	17.1193	17.3391	16.4439	16.3139	16.4331	16.5569	16.5267	16.1726
	0.884199	-0.435175	0.739604	High	Q86WN1	F-BAR and double SH3 domains protein 1 OS=Homo sapiens OX=9606	FCHSD1	+	Cluster -800	3.61495	0.000212066	4.169	3	2	9	2	690	76.9	5.34		16.2411	15.964	16.3464	16.132	15.4649	15.649	15.5252	14.8058	15.5896	15.2855	14.9575	15.2186	15.5451	15.3745	15.5173	15.7828	15.2509	15.7641	16.4026	16.4396	16.4574	15.3404	15.2594	14.9765
	1.97488	-0.437096	0.73862	High	P40227	T-complex protein 1 subunit zeta OS=Homo sapiens OX=9606	CCT6A	+	Cluster -803	4.61744	6.61939e-05	19.438	14	7	131	7	531	58	6.68		18.3362	18.5504	18.5844	17.9391	18.1009	18.1197	18.1398	17.1405	17.9679	18.1426	17.7462	17.8164	17.8912	17.9823	17.8224	17.3577	17.4942	17.3432	17.8571	17.8589	17.9001	17.7811	17.7418	17.7013
+	2.30728	-0.437574	0.738375	High	Q9Y4P3	Transducin beta-like protein 2 OS=Homo sapiens OX=9606	TBL2	+	Cluster -803	4.10857	0.000106339	14.564	12	5	71	5	447	49.8	9.44		17.5061	17.2587	17.3227	16.8779	16.9419	16.9549	17.1929	16.6031	16.7634	17.1464	17.0862	16.9895	17.0163	17.2421	17.0594	17.239	17.1265	17.3608	17.5308	17.5253	17.5835	17.3765	17.3913	17.0449
	1.88349	-0.438719	0.737789	High	P36542	ATP synthase subunit gamma, mitochondrial OS=Homo sapiens OX=9606	ATP5F1C	+	Cluster -803	4.46448	6.37813e-05	7.096	9	3	81	3	298	33	9.22		17.524	17.3038	17.2698	16.797	16.982	17.0023	16.805	16.1281	16.7281	16.9637	16.8533	16.9017	16.9894	16.9972	16.9604	16.8419	16.7143	16.8423	16.9758	16.9782	16.9408	16.8573	16.8891	16.4728
+	3.57053	-0.439491	0.737395	High	Q14258	E3 ubiquitin/ISG15 ligase TRIM25 OS=Homo sapiens OX=9606	TRIM25	+	Cluster -803	7.94014	0	13.493	12	5	113	5	630	70.9	8.09		17.7503	17.676	17.686	17.2259	17.2491	17.3188	17.6758	16.822	17.4144	17.2904	17.1595	17.1287	17.266	17.3705	17.3611	16.5147	16.6037	16.6517	17.3387	17.4773	17.5605	17.4597	17.3463	17.0802
	1.99183	-0.441664	0.736285	High	P31689	DnaJ homolog subfamily A member 1 OS=Homo sapiens OX=9606	DNAJA1	+	Cluster -803	3.70073	0.000179775	10.974	12	3	62	3	397	44.8	7.08		17.2568	17.319	17.5696	16.9492	16.9145	16.9566	17.3534	16.3848	17.0867	17.1215	17.0022	16.8729	17.101	17.241	17.3016	16.708	16.8439	16.8838	17.0945	17.078	17.1852	17.0683	17.3022	16.9321
+	4.93663	-0.441707	0.736263	High	P62263	40S ribosomal protein S14 OS=Homo sapiens OX=9606	RPS14	+	Cluster -800	6.64942	4.91803e-05	23.637	29	3	214	3	151	16.3	10.05		19.1813	19.2009	19.1498	18.731	18.7263	18.7496	18.8017	17.8281	18.7713	18.4715	18.1593	18.2662	18.4946	18.5801	18.5515	18.9647	18.9907	18.9669	19.0373	19.1197	19.1136	18.4807	18.5888	18.0276
	1.23192	-0.442482	0.735868	High	P13797	Plastin-3 OS=Homo sapiens OX=9606	PLS3	+	Cluster -803	4.13661	0.000106776	45.556	20	10	163	6	630	70.8	5.6		17.7193	17.8824	17.3378	17.2038	17.1188	17.2894	17.3399	16.8026	17.2524	17.3663	17.1932	16.9739	17.2593	17.1731	17.3209	16.5162	16.0252	16.4987	17.2561	17.0423	17.2171	17.2292	17.2378	16.5985
	0.900756	-0.444215	0.734984	High	O14744	Protein arginine N-methyltransferase 5 OS=Homo sapiens OX=9606	PRMT5	+	Cluster -800	15.1062	0	98.112	28	14	340	14	637	72.6	6.29		18.183	17.7012	17.9247	17.1322	17.7311	17.613	17.631	17.269	17.8283	17.7545	17.5904	17.7074	18.2924	18.4776	18.4244	22.5925	22.5718	22.62	17.9799	17.9076	18.0971	18.0511	18.0919	17.942
	2.0904	-0.444327	0.734927	High	P29728	2'-5'-oligoadenylate synthase 2 OS=Homo sapiens OX=9606	OAS2	+	Cluster -803	6.36156	4.46097e-05	14.411	6	4	153	4	719	82.4	8.25		18.7916	19.0589	19.0374	18.5106	18.4701	18.5742	18.7009	17.6655	18.3729	18.3924	18.2966	18.1488	18.2904	18.3646	18.4176	17.7586	17.7491	17.7707	18.4519	18.449	18.5167	18.3273	18.3752	17.9692
	1.508	-0.445736	0.73421	High	P60981	Destrin OS=Homo sapiens OX=9606	DSTN	+	Cluster -803	3.49659	0.000270945	20.915	25	4	167	4	165	18.5	7.85		19.217	18.8034	18.833	18.4657	18.4847	18.5657	19.0127	18.7835	19.1272	18.5441	18.9542	18.9737	18.5101	18.6226	18.5986	17.9434	17.9481	18.1587	18.6125	18.5602	18.6053	18.7046	18.7846	18.8292
	1.93491	-0.445899	0.734127	High	Q9NZ01	Very-long-chain enoyl-CoA reductase OS=Homo sapiens OX=9606	TECR	+	Cluster -803	4.7104	4.86618e-05	4.192	3	1	31	1	308	36	9.45		15.8458	15.5948	15.8731	15.2584	15.2972	15.4205	14.98	14.1924	14.9702	15.2744	14.9195	14.8462	15.27	15.5895	15.3267	14.9333	14.8197	15.0071	15.5527	15.3077	15.2457	15.4636	15.4833	15.2715
	1.48422	-0.447839	0.73314	High	O60488	Long-chain-fatty-acid--CoA ligase 4 OS=Homo sapiens OX=9606	ACSL4	+	Cluster -803	2.27098	0.00231461	6.598	3	2	66	1	711	79.1	8.38		14.9308	14.7781	14.5942	14.5179	14.1924	14.2493	14.4529	13.5994	14.3794	14.1119	14.2013	13.7458	14.4201	14.5369	14.4734	14.3551	14.2791	14.3082	14.8131	14.787	14.6836	14.6083	14.6175	14.1325
+	2.29987	-0.447989	0.733064	High	P55060	Exportin-2 OS=Homo sapiens OX=9606	CSE1L	+	Cluster -803	3.63832	0.0002	5.847	2	2	41	2	971	110.3	5.77		17.3175	17.2233	17.1406	16.6559	16.8452	16.8364	17.1385	16.4244	16.9856	16.5418	16.4466	16.2482	16.4788	16.51	16.3891	16.2002	15.7204	16.2744	17.0347	16.5996	16.6784	17.0437	17.1156	16.405
	0.479191	-0.448435	0.732837	High	P51991	Heterogeneous nuclear ribonucleoprotein A3 OS=Homo sapiens OX=9606	HNRNPA3			NaN	NaN	19.505	11	3	109	3	378	39.6	9.01		17.5557	17.7302	16.4689	16.6415	16.9777	16.7903	17.1265	16.6193	16.8591	16.8078	16.5481	16.71	16.9938	17.0634	17.069	17.5053	17.4243	17.486	17.2505	17.2298	17.3079	17.2366	17.2327	16.4534
	2.08133	-0.451138	0.731466	High	O14879	Interferon-induced protein with tetratricopeptide repeats 3 OS=Homo sapiens OX=9606	IFIT3	+	Cluster -803	5.92431	3.93443e-05	71.291	41	11	424	11	490	56	5.2		20.443	20.4649	20.2125	19.8393	19.93	19.9977	20.2482	19.5861	20.1756	20.1783	19.9863	19.915	20.1058	20.2678	20.2038	19.6269	19.3428	19.7267	20.2547	20.3316	20.3466	20.081	20.0923	19.6891
	0.161581	-0.453024	0.73051	High	Q96QR8	Transcriptional activator protein Pur-beta OS=Homo sapiens OX=9606	PURB			NaN	NaN	4.387	9	2	10	2	312	33.2	5.43		13.8573	16.057	13.8058	15.5942	13.1636	13.6033	13.4504	13.9935	14.9077	12.9918	15.4508	15.2523	13.3337	16.1194	13.4059	16.2409	16.47	16.7121	16.7678	16.9925	16.8852	15.8656	13.6715	14.7901
+	3.45211	-0.453063	0.73049	High	P63104	14-3-3 protein zeta/delta OS=Homo sapiens OX=9606	YWHAZ	+	Cluster -800	12.4487	0	63.699	51	12	346	11	245	27.7	4.79	Acetyl [N-Term]	19.3679	19.2756	19.3134	18.8063	18.9015	18.8899	18.2672	17.231	18.5238	18.0398	17.9556	17.9739	18.3133	18.2432	18.1607	20.8852	20.9564	20.9604	18.6216	18.448	18.4434	18.2167	18.2253	17.5263
+	2.27625	-0.453932	0.73005	High	Q9UBN7	Histone deacetylase 6 OS=Homo sapiens OX=9606	HDAC6	+	Cluster -800	10.6362	0	15.091	4	5	158	5	1215	131.3	5.3		18.2171	18.3428	18.0595	17.7422	17.7467	17.7687	18.4323	17.631	18.3153	18.2429	18.0571	18.1443	17.8338	18.0374	18.0508	18.0191	18.13	18.2308	19.4361	19.4315	19.4188	18.479	18.4124	17.86
	1.04365	-0.454352	0.729838	High	Q13185	Chromobox protein homolog 3 OS=Homo sapiens OX=9606	CBX3	+	Cluster -800	2.41659	0.00170262	4.985	7	1	31	1	183	20.8	5.33		15.8389	15.9544	16.2242	15.2232	15.6414	15.79	15.982	15.1596	15.657	15.3644	15.4994	15.2752	15.4741	15.5705	15.6883	15.7976	15.8128	16.0228	15.5228	15.5322	15.5983	15.7004	15.7841	15.4334
+	2.69406	-0.455538	0.729238	High	Q15436	Protein transport protein Sec23A OS=Homo sapiens OX=9606	SEC23A	+	Cluster -803	4.94769	5.18135e-05	29.68	10	6	258	4	765	86.1	7.08		17.7247	17.861	17.7599	17.3079	17.2524	17.4187	17.5688	17.0668	17.6913	17.5689	17.6295	17.4735	17.5214	17.529	17.6731	17.2639	17.1369	17.1831	17.6996	17.626	17.5589	17.5112	17.5959	17.0378
	0.700145	-0.457633	0.72818	High	P54886	Delta-1-pyrroline-5-carboxylate synthase OS=Homo sapiens OX=9606	ALDH18A1	+	Cluster -803	4.97526	5.22193e-05	21.384	11	7	113	7	795	87.2	7.12		16.5441	17.2672	17.3775	16.5924	16.3639	16.8595	17.4689	16.816	17.4314	17.3552	17.2197	17.2265	17.0192	17.3156	17.0176	16.4025	16.7089	16.7493	17.6394	17.4689	17.5128	17.4968	17.5597	17.3316
+	4.15806	-0.460797	0.726585	High	P07355	Annexin A2 OS=Homo sapiens OX=9606	ANXA2	+	Cluster -803	10.7102	0	119.82	59	19	2703	19	339	38.6	7.75	Met-loss+Acetyl [N-Term]	24.2847	24.2904	24.3082	23.821	23.7961	23.8838	23.9698	23.1063	23.839	23.6428	23.3877	23.4178	23.6849	23.7993	23.7443	23.067	23.0206	23.1163	23.6625	23.6957	23.7558	23.8321	23.8053	23.5586
+	2.58141	-0.462161	0.725898	High	P02751	Fibronectin OS=Homo sapiens OX=9606	FN1	+	Cluster -800	9.40972	0	74.716	12	20	456	20	2477	272.2	5.5		19.9121	19.9773	19.7516	19.3993	19.4024	19.4527	19.8061	19.2999	19.8528	18.825	18.4735	18.5833	19.6283	19.8797	19.8127	20.2919	20.255	20.3335	19.3158	19.2918	19.5581	19.9926	19.972	19.4763
	1.05047	-0.462821	0.725566	High	Q8NFW8	N-acylneuraminate cytidylyltransferase OS=Homo sapiens OX=9606	CMAS	+	Cluster -800	9.6138	0	8.403	7	3	21	3	434	48.3	7.93		15.521	14.931	15.3759	14.7552	14.6646	15.0196	14.6141	13.9098	14.4843	14.8546	14.3955	14.7958	14.9653	15.0797	15.0655	16.7774	16.8133	16.887	15.9147	15.5799	15.9965	15.8834	15.8961	15.305
	1.32916	-0.463576	0.725187	High	P60866	40S ribosomal protein S20 OS=Homo sapiens OX=9606	RPS20	+	Cluster -800	4.91428	5.12821e-05	20.219	26	3	191	3	119	13.4	9.94	Met-loss+Acetyl [N-Term]	19.7125	19.4128	19.1678	18.9148	18.9353	19.0523	18.8412	18.185	18.769	18.9179	18.444	18.9012	18.6071	18.8267	18.7695	19.5591	19.6147	19.6151	19.3509	19.392	19.3351	19.0714	18.9859	18.5889
+	2.8036	-0.464003	0.724972	High	P49411	Elongation factor Tu, mitochondrial OS=Homo sapiens OX=9606	TUFM	+	Cluster -803	3.9932	0.000120482	48.551	27	10	325	10	452	49.5	7.61		19.9973	19.9424	19.8916	19.4309	19.4238	19.5846	19.8242	18.594	19.4618	19.5563	19.3468	19.3086	19.6198	19.8077	19.6041	19.215	19.2113	19.0967	19.6183	19.7274	19.7322	19.8882	19.9419	19.4363
	2.01366	-0.464336	0.724804	High	O14950	Myosin regulatory light chain 12B OS=Homo sapiens OX=9606	MYL12B	+	Cluster -803	6.25368	4.27046e-05	29.651	30	5	558	2	172	19.8	4.84		19.6564	19.9164	19.8723	19.2654	19.3215	19.4652	19.8315	18.9651	19.6439	19.5436	19.3871	19.3789	19.5431	19.7165	19.6381	19.4453	19.4095	19.4154	19.5896	19.5972	19.5717	19.6806	19.6175	19.3462
+	3.92445	-0.465673	0.724133	High	Q9NZT2	Opioid growth factor receptor OS=Homo sapiens OX=9606	OGFR	+	Cluster -803	10.3209	0	37.982	13	7	225	7	677	73.3	4.84		18.5778	18.6116	18.5548	18.0656	18.1563	18.1252	18.7741	18.1689	18.8673	18.6526	18.5267	18.4716	18.032	18.2832	18.1736	17.6381	17.4912	17.4799	18.4275	18.5586	18.4951	18.6186	18.637	18.419
+	3.59279	-0.46581	0.724064	High	Q15149	Plectin OS=Homo sapiens OX=9606	PLEC	+	Cluster -803	6.20134	4.1958e-05	243.07	17	66	1919	61	4684	531.5	5.96		21.8492	21.8297	21.8407	21.3367	21.3362	21.4493	21.618	20.954	21.6277	21.3687	21.2286	21.1666	21.5178	21.6756	21.6342	21.5178	21.2822	21.5769	21.7683	21.8114	21.819	21.6872	21.6674	21.355
	0.944332	-0.465936	0.724001	High	P52789	Hexokinase-2 OS=Homo sapiens OX=9606	HK2			NaN	NaN	13.37	5	4	51	4	917	102.3	6.05		17.0257	17.2675	17.2127	16.3515	17.1047	16.6519	16.3543	16.1656	16.8117	16.5662	16.5798	16.7936	16.7589	16.9433	16.8437	16.4702	16.394	16.5278	16.7118	16.6856	16.881	17.0226	17.0556	16.8814
+	3.06793	-0.466396	0.723771	High	Q00325	Phosphate carrier protein, mitochondrial OS=Homo sapiens OX=9606	SLC25A3	+	Cluster -803	9.23583	0	14.322	14	5	202	5	362	40.1	9.38		19.2637	19.2155	19.1493	18.7097	18.6968	18.8229	19.0674	18.266	19.0235	18.678	18.3932	18.4803	18.5831	18.8297	18.6913	17.9435	17.8092	17.8887	18.8043	18.8706	18.7701	18.7683	18.7167	18.5367
+	2.41411	-0.466674	0.723631	High	Q15084	Protein disulfide-isomerase A6 OS=Homo sapiens OX=9606	PDIA6	+	Cluster -803	7.46473	3.92157e-05	163.842	55	16	1822	16	440	48.1	5.08		23.8161	23.9005	23.9373	23.2909	23.4357	23.5273	23.7256	23.0587	23.7383	23.4276	23.1288	23.1205	23.5326	23.608	23.5319	23.0774	23.0338	23.0599	23.5346	23.5182	23.5681	23.6138	23.6176	23.414
	1.45295	-0.467572	0.723181	High	O60506	Heterogeneous nuclear ribonucleoprotein Q OS=Homo sapiens OX=9606	SYNCRIP	+	Cluster -800	6.55688	4.7619e-05	18.198	10	5	161	5	623	69.6	8.59		18.2097	17.7073	17.9157	17.4104	17.5068	17.5128	17.7408	16.7506	17.6228	17.1511	16.9553	17.2065	17.3436	17.5146	17.3011	18.4175	18.3237	18.4097	17.9717	17.9817	17.9273	17.8611	17.6499	17.3366
+	4.14685	-0.468059	0.722937	High	O95881	Thioredoxin domain-containing protein 12 OS=Homo sapiens OX=9606	TXNDC12	+	Cluster -800	4.85961	4.98753e-05	16.973	27	4	138	4	172	19.2	5.4		20.4948	20.5068	20.4908	19.975	20.0554	20.0579	20.2545	19.8315	20.2917	19.7419	19.3806	19.4865	19.9049	20.0117	19.9951	20.1474	20.0769	20.1861	20.0265	19.9809	19.9551	20.1804	20.2016	19.8737
	1.59152	-0.469392	0.722269	High	Q9NP72	Ras-related protein Rab-18 OS=Homo sapiens OX=9606	RAB18	+	Cluster -803	3.9012	0.000134387	8.04	16	3	33	3	206	23	5.24		19.629	19.2447	19.2071	18.8838	18.9135	18.8753	19.2064	18.6333	19.1702	19.085	19.1206	18.7629	19.1288	19.1507	19.1341	18.5652	18.4978	18.5911	18.9109	18.9482	18.9667	18.9753	19.0173	18.8118
	1.3698	-0.469611	0.722159	High	Q9P0L0	Vesicle-associated membrane protein-associated protein A OS=Homo sapiens OX=9606	VAPA	+	Cluster -803	2.29011	0.00220085	9.664	15	3	66	3	249	27.9	8.62		17.0206	17.4446	17.4512	16.6984	16.8614	16.9477	17.4108	16.5029	17.0642	16.9456	16.6669	16.7243	16.8151	17.0432	17.2341	16.7986	16.5398	16.545	17.063	16.8942	17.1367	17.1912	17.1378	16.7497
	0.415754	-0.471748	0.72109	High	P84243	Histone H3.3 OS=Homo sapiens OX=9606	H3-3B			NaN	NaN	7.183	8	1	10	1	136	15.3	11.27		14.7004	13.173	14.3525	13.7878	13.3291	13.6936	14.277	11.7892	13.8424	13.0449	13.1465	12.9657	13.4119	12.9836	12.9362	12.7279	12.9247	12.9226	14.1747	13.0402	14.0597	13.1507	12.805	12.406
+	2.20002	-0.472045	0.720942	High	P00390	Glutathione reductase, mitochondrial OS=Homo sapiens OX=9606	GSR	+	Cluster -803	4.70803	4.85437e-05	70.08	27	10	858	10	522	56.2	8.5		21.191	21.2223	21.4439	20.8143	20.8861	20.7407	21.2196	20.4708	21.1831	20.7347	20.7371	20.6437	20.8675	21.0924	20.9758	20.3735	20.455	20.4624	20.9502	20.8878	20.9089	20.9991	20.9487	20.762
	1.29516	-0.472214	0.720857	High	P46060	Ran GTPase-activating protein 1 OS=Homo sapiens OX=9606	RANGAP1	+	Cluster -803	2.84013	0.000699213	6.668	4	2	21	2	587	63.5	4.68		15.5266	15.0858	15.3095	14.6071	14.9545	14.9437	15.2	14.5086	15.175	14.9797	14.8033	14.7503	14.7049	15.1262	14.9372	13.5432	13.8015	14.7094	15.0701	14.929	15.2249	15.3564	15.1733	14.9765
	0.333995	-0.472361	0.720784	High	P01700	Immunoglobulin lambda variable 1-47 OS=Homo sapiens OX=9606	IGLV1-47			NaN	NaN	4.399	11	1	16	1	117	12.3	5.91		13.1907	14.0537	13.3802	12.6051	14.1095	12.4929	12.3231	11.4362	12.4841	11.8071	11.8711	11.9884	13.4207	12.1049	12.1236	12.5453	11.6808	12.2864	12.0632	12.8804	11.5763	12.6322	12.677	12.115
	1.46995	-0.472441	0.720744	High	Q9Y3U8	60S ribosomal protein L36 OS=Homo sapiens OX=9606	RPL36	+	Cluster -800	10.1404	0	14.404	29	3	218	3	105	12.2	11.59		18.2909	17.8738	18.264	17.6813	17.5549	17.7751	17.9479	17.0526	17.8137	17.6113	16.9104	17.0622	17.6133	17.7539	17.744	17.9411	18.0614	18.0864	19.5717	19.5678	19.5642	17.5905	17.5642	17.2359
	1.943	-0.473373	0.720279	High	Q9Y265	RuvB-like 1 OS=Homo sapiens OX=9606	RUVBL1			NaN	NaN	8.702	8	3	44	3	456	50.2	6.42		17.4506	17.5474	17.4376	17.1401	17.068	16.8074	16.8352	16.761	17.9513	16.7947	16.4344	16.5738	16.5865	17.1595	16.6459	16.8068	16.3518	16.8778	17.0315	16.398	16.9124	16.9136	17.0103	16.8843
	0.337512	-0.473947	0.719992	High	Q66LE6	Serine/threonine-protein phosphatase 2A 55 kDa regulatory subunit B delta isoform OS=Homo sapiens OX=9606	PPP2R2D			NaN	NaN	24.834	17	5	61	2	453	52	6.39	Met-loss+Acetyl [N-Term]	13.7566	13.2964	13.7834	14.243	12.4487	12.7228	12.5753	13.1762	13.2435	14.3111	11.7546	13.6627	13.5773	12.9028	13.7202	13.2177	13.278	13.7667	12.6833	12.9786	13.0465	12.7949	13.2099	12.0006
	1.02347	-0.475527	0.719204	High	P29034	Protein S100-A2 OS=Homo sapiens OX=9606	S100A2	+	Cluster -801	6.10557	4.12371e-05	10.283	28	3	28	3	98	11.1	4.78		15.9353	16.4558	15.9779	15.3695	15.7506	15.8222	13.075	12.082	12.6527	13.5415	14.0073	13.062	12.7023	12.2504	12.8522	13.4267	12.3047	14.0606	13.1147	13.796	13.1817	13.1629	12.2603	13.225
	1.96023	-0.476948	0.718496	High	Q02809	Procollagen-lysine,2-oxoglutarate 5-dioxygenase 1 OS=Homo sapiens OX=9606	PLOD1			NaN	NaN	12.197	6	3	196	3	727	83.5	6.95		17.5008	17.5526	17.5495	16.915	17.2623	16.9947	17.3085	16.1551	17.0695	16.87	16.8158	16.5766	17.1694	17.2017	17.216	16.9902	16.8273	16.7149	17.0551	17.1429	17.1887	17.2043	17.1801	16.9658
	0.467137	-0.47736	0.718291	High	O75962	Triple functional domain protein OS=Homo sapiens OX=9606	TRIO			NaN	NaN	2.925	0	1	4	1	3097	346.7	6.37		14.2314	14.8602	15.7543	14.4901	14.4367	14.4869	14.8998	14.5946	14.8368	14.4058	14.5255	14.4007	14.139	14.422	14.3202	13.7892	13.8644	13.5987	14.3654	14.4128	14.3427	14.4357	14.3524	14.1431
	0.661528	-0.477891	0.718026	High	O00410	Importin-5 OS=Homo sapiens OX=9606	IPO5	+	Cluster -800	1.94399	0.00468063	20.088	6	5	165	5	1097	123.6	4.94		17.9149	18.7896	18.8931	17.8467	18.1671	18.1501	18.1279	17.4695	18.0723	18.036	17.7338	17.8429	17.9075	17.9248	17.7653	18.4008	18.3853	18.4238	17.7993	17.7691	17.9095	17.98	17.9198	17.8047
+	2.45764	-0.479858	0.717048	High	P62750	60S ribosomal protein L23a OS=Homo sapiens OX=9606	RPL23A	+	Cluster -800	7.48855	3.9604e-05	20.248	21	3	172	3	156	17.7	10.45		19.3378	19.15	19.1304	18.6661	18.7085	18.804	18.6712	18.173	18.8345	18.6662	18.3215	18.278	18.6675	18.8292	18.733	19.4257	19.4134	19.3057	19.4737	19.7361	19.8684	18.5389	18.4273	18.3829
+	2.17276	-0.480408	0.716775	High	P07814	Bifunctional glutamate/proline--tRNA ligase OS=Homo sapiens OX=9606	EPRS1	+	Cluster -803	6.39167	4.5283e-05	34.26	8	8	149	8	1512	170.5	7.33		18.0128	17.9983	17.9616	17.37	17.4781	17.6834	17.8212	17.1548	17.91	17.8399	17.6721	17.6573	17.7277	17.903	17.8546	17.6935	17.4935	17.757	18.0247	18.1141	18.1748	17.9469	18.0084	17.4987
+	2.96778	-0.480417	0.716771	High	P0DMV9	Heat shock 70 kDa protein 1B OS=Homo sapiens OX=9606	HSPA1B	+	Cluster -800	21.5956	0	149.647	42	20	1755	11	641	70	5.66		18.6709	18.6924	18.8048	18.3027	18.1696	18.2545	17.9516	17.196	17.9183	17.8499	17.5941	17.5876	17.8593	17.9524	18.0398	22.0784	21.9512	22.0351	18.2469	18.218	18.1498	18.1266	18.0806	17.8184
	1.79847	-0.480787	0.716587	High	P61981	14-3-3 protein gamma OS=Homo sapiens OX=9606	YWHAG	+	Cluster -800	12.7313	0	21.733	19	4	231	2	247	28.3	4.89		16.6344	16.2493	16.4944	15.9207	15.9578	16.0572	15.7929	14.5381	15.6086	15.8863	15.3867	15.8043	15.7862	15.7555	15.841	19.1811	19.208	19.1452	15.9325	15.7435	15.7777	15.6432	15.8857	15.0543
+	2.58073	-0.481846	0.716061	High	P62913	60S ribosomal protein L11 OS=Homo sapiens OX=9606	RPL11	+	Cluster -800	6.34775	4.42804e-05	18.867	28	5	284	5	178	20.2	9.6	Met-loss+Acetyl [N-Term]	19.832	19.8183	19.6371	19.308	19.2099	19.3239	19.4229	18.9656	19.7566	18.98	19.0073	19.0715	18.9047	19.0827	19.0286	19.3173	19.1066	19.3917	20.354	20.3606	20.353	19.2112	19.2177	19.1823
+	2.85058	-0.483503	0.715239	High	Q9Y421	Protein FAM32A OS=Homo sapiens OX=9606	FAM32A	+	Cluster -803	2.85713	0.000690967	10.294	20	2	117	2	112	13.2	9.99		18.0007	18.1977	18.163	17.6528	17.638	17.6201	17.9954	17.0285	17.7838	17.6932	17.2541	17.1927	17.7401	17.8421	17.6643	17.2862	17.3187	17.3081	17.8009	17.8898	17.9477	17.6275	17.6089	17.0754
	1.73507	-0.486475	0.713767	High	P61313	60S ribosomal protein L15 OS=Homo sapiens OX=9606	RPL15	+	Cluster -800	11.1504	0	24.716	24	4	198	4	204	24.1	11.62		18.7314	19.0955	19.0725	18.4905	18.3947	18.5548	18.777	17.9091	18.7386	18.6421	18.5953	18.6461	18.8324	19.0435	19.0764	19.3764	19.461	19.3227	20.2533	20.322	20.3467	19.392	19.4328	19.0498
+	4.4934	-0.487923	0.713051	High	P09543	2',3'-cyclic-nucleotide 3'-phosphodiesterase OS=Homo sapiens OX=9606	CNP	+	Cluster -803	11.7475	0	23.374	17	7	322	7	421	47.5	9.07		19.5183	19.522	19.4933	18.9917	19.0131	19.065	18.8993	18.1025	18.9353	18.892	18.6083	18.5476	18.9224	18.9792	18.9679	18.2648	18.2143	18.3645	19.017	18.9384	19.032	18.8999	18.8185	18.5624
+	2.0739	-0.488581	0.712726	High	P11413	Glucose-6-phosphate 1-dehydrogenase OS=Homo sapiens OX=9606	G6PD	+	Cluster -803	4.40895	7.15884e-05	25.427	22	8	187	8	515	59.2	6.84	Met-loss+Acetyl [N-Term]	19.3637	19.5226	19.288	18.7809	18.892	19.0356	18.8843	18.2211	18.9628	18.7436	18.5858	18.4614	18.9651	19.1107	19.0649	18.5893	18.5648	18.5642	18.8614	18.9049	18.9947	18.8672	18.8979	18.5691
	0.385941	-0.491412	0.711328	High	P13798	Acylamino-acid-releasing enzyme OS=Homo sapiens OX=9606	APEH			NaN	NaN	4.627	2	1	3	1	732	81.2	5.48		14.8943	13.3678	13.4426	13.3622	13.0878	13.7805	13.8441	12.1961	13.2887	13.2644	13.0688	13.1555	13.4483	13.9566	13.6049	13.3483	13.2798	13.3672	13.4675	13.3012	13.4	13.3011	13.747	13.2646
+	2.93247	-0.492854	0.710618	High	P23528	Cofilin-1 OS=Homo sapiens OX=9606	CFL1	+	Cluster -803	1.77895	0.00722843	62.309	63	10	655	10	166	18.5	8.09		21.7895	21.6035	21.6225	21.1643	21.1913	21.1813	21.4727	20.867	21.2153	21.1338	21.0975	21.1898	21.1219	21.2808	21.2811	21.0717	20.9974	21.0786	21.2592	21.1719	21.1959	21.2704	21.2164	20.9993
+	2.82761	-0.494792	0.709664	High	O43670	BUB3-interacting and GLEBS motif-containing protein ZNF207 OS=Homo sapiens OX=9606	ZNF207			NaN	NaN	6.804	5	2	47	2	478	50.7	9.1		16.3281	16.278	16.4657	15.8284	15.836	15.923	16.0926	15.6065	16.0264	15.8215	15.7987	15.7566	15.957	16.0595	16.0442	15.708	15.655	14.7863	15.9371	16.0235	16.1446	16.1307	16.2491	16.1477
+	2.33819	-0.494797	0.709661	High	Q9BQA1	Methylosome protein 50 OS=Homo sapiens OX=9606	WDR77	+	Cluster -800	17.5817	0	30.935	24	6	123	6	342	36.7	5.17		16.6182	16.7995	16.7144	16.127	16.3509	16.1698	16.4888	15.8796	16.4632	16.4418	16.3952	15.9302	17.0901	16.9389	16.8251	21.1731	21.1655	21.2174	16.6507	16.6698	16.7691	16.7283	16.6575	16.259
+	2.07429	-0.494993	0.709565	High	P38646	Stress-70 protein, mitochondrial OS=Homo sapiens OX=9606	HSPA9	+	Cluster -800	6.50838	4.72441e-05	64.818	21	10	595	10	679	73.6	6.16		20.034	19.828	20.1797	19.5355	19.5118	19.5095	20.2715	19.3247	19.9694	19.5668	19.2795	19.2269	19.7733	19.8495	19.8205	20.1268	20.0489	20.206	19.9102	19.8084	19.9828	19.8743	19.8089	19.4703
	1.31446	-0.495528	0.709302	High	Q8N6Y2	Leucine-rich repeat-containing protein 17 OS=Homo sapiens OX=9606	LRRC17	+	Cluster -803	3.87912	0.000148728	2.798	2	1	12	1	441	51.8	8.24		15.8558	15.6793	15.5603	15.3494	14.8945	15.3649	15.1485	14.3016	15.0748	14.8558	14.4432	14.6325	15.3956	15.4018	15.6334	15.2578	15.1038	15.2292	15.3439	15.3963	15.4294	15.5967	15.7901	15.1675
	1.26744	-0.495839	0.709149	High	P53992	Protein transport protein Sec24C OS=Homo sapiens OX=9606	SEC24C	+	Cluster -801	7.59808	2.03046e-05	9.64	3	3	50	3	1094	118.2	7.06		17.8789	17.2526	17.5855	17.0963	17.0158	17.1175	17.2956	16.5853	17.1239	16.9281	16.5528	16.4738	16.9075	17.0651	17.0358	15.9871	15.8966	15.8865	16.5133	16.4173	16.4374	16.2719	16.2627	15.955
	1.51211	-0.499759	0.707225	High	Q8IV50	LysM and putative peptidoglycan-binding domain-containing protein 2 OS=Homo sapiens OX=9606	LYSMD2	+	Cluster -803	3.78927	0.00016092	3.56	5	1	13	1	215	23.4	5.35		15.7579	15.6236	15.5254	14.9795	15.019	15.4092	15.6756	14.6197	15.5086	15.1791	15.1139	15.1198	15.0279	15.1632	15.225	14.7472	14.5973	14.5797	14.7803	15.0696	15.2578	14.9775	14.9542	14.5504
	0.703863	-0.5009	0.706666	High	P40939	Trifunctional enzyme subunit alpha, mitochondrial OS=Homo sapiens OX=9606	HADHA	+	Cluster -803	3.31875	0.000373514	17.745	10	6	108	6	763	82.9	9.04		18.1475	17.0915	17.3949	16.9101	17.1956	17.0255	17.1701	15.7834	16.5392	17.5733	17.2607	17.0775	17.511	17.7398	17.6947	17.4839	17.3879	17.435	17.7206	17.8274	17.8678	17.8938	17.8688	17.0584
+	2.03322	-0.501085	0.706575	High	Q14166	Tubulin--tyrosine ligase-like protein 12 OS=Homo sapiens OX=9606	TTLL12			NaN	NaN	2.712	2	1	21	1	644	74.4	5.53		14.9088	15.0812	15.0837	14.3516	14.6516	14.5673	14.9332	13.9906	14.3655	14.2569	14.3646	13.5262	14.3168	14.2418	14.524	14.1345	13.8355	13.9515	14.566	14.4405	14.5821	14.361	14.298	14.6694
	1.49548	-0.501226	0.706506	High	P11586	C-1-tetrahydrofolate synthase, cytoplasmic OS=Homo sapiens OX=9606	MTHFD1	+	Cluster -803	6.18773	4.18118e-05	10.08	5	4	41	4	935	101.5	7.3		16.2093	16.6232	16.7011	15.9583	16.0541	16.0176	17.0559	16.1644	16.8461	16.4349	16.2346	16.2196	16.1611	16.377	16.3627	15.9776	15.8838	16.0309	16.6777	16.716	16.5914	16.2918	16.3332	16.2106
+	2.74142	-0.501859	0.706196	High	P30153	Serine/threonine-protein phosphatase 2A 65 kDa regulatory subunit A alpha isoform OS=Homo sapiens OX=9606	PPP2R1A	+	Cluster -803	4.63775	5.71429e-05	70.658	25	11	699	11	589	65.3	5.11		19.6647	19.8461	19.8745	19.2626	19.3255	19.2916	19.7819	19.1321	19.7224	19.3984	19.1708	19.1778	19.2371	19.4492	19.3508	19.2299	19.2058	19.1708	19.617	19.5331	19.6655	19.5358	19.3567	19.1521
	1.89747	-0.503663	0.705314	High	Q9H0C8	Integrin-linked kinase-associated serine/threonine phosphatase 2C OS=Homo sapiens OX=9606	ILKAP	+	Cluster -803	4.88218	5.05051e-05	2.756	2	1	24	1	392	42.9	7.09		15.6371	15.2441	15.5125	14.9296	14.9658	14.9872	15.4698	14.8876	15.4072	14.9431	14.8776	14.5412	14.9584	15.1872	15.1185	14.4383	14.4817	14.4566	14.95	15.0362	14.9814	15.0322	14.9775	14.6441
	0.312369	-0.504193	0.705055	High	Q9BRP1	Programmed cell death protein 2-like OS=Homo sapiens OX=9606	PDCD2L			NaN	NaN	4.021	6	2	16	2	358	39.4	4.86	Met-loss+Acetyl [N-Term]	13.4882	14.2425	13.3172	11.9963	13.8875	13.6516	14.7327	13.5357	14.3348	14.4252	13.7596	15.2349	13.024	10.954	14.7525	14.0052	13.4929	12.1135	13.9943	14.1598	14.9973	14.7174	15.2201	13.3264
+	3.85547	-0.5051	0.704611	High	P35579	Myosin-9 OS=Homo sapiens OX=9606	MYH9	+	Cluster -803	6.98728	5.24017e-05	385.418	37	66	3459	61	1960	226.4	5.6		23.2994	23.3549	23.3179	22.7703	22.809	22.8776	23.0818	22.3014	23.0046	22.8207	22.6844	22.638	22.8657	23.0462	23.0344	22.5646	22.568	22.5594	22.8796	22.8591	22.9276	22.9012	22.9104	22.6348
	1.59115	-0.506659	0.70385	High	Q14103	Heterogeneous nuclear ribonucleoprotein D0 OS=Homo sapiens OX=9606	HNRNPD	+	Cluster -800	4.33981	7.06402e-05	6.475	5	2	155	1	355	38.4	7.81		15.8679	16.2153	16.0049	15.4404	15.3954	15.7322	16.6239	15.4757	16.5928	16.4889	15.8607	15.8732	16.0542	16.6323	16.4121	16.813	16.7071	16.4412	16.646	15.8782	15.929	16.5517	16.2576	16.3901
	0.912401	-0.507809	0.70329	High	P09211	Glutathione S-transferase P OS=Homo sapiens OX=9606	GSTP1	+	Cluster -801	2.96669	0.000539326	12.649	27	3	12	3	210	23.3	5.64		15.6876	16.0616	16.5759	15.6688	15.5541	15.5787	15.4259	14.5455	14.9739	14.8076	14.4341	14.421	15.2583	15.2082	15.4207	15.1997	14.9945	14.7772	15.4681	15.5062	15.5457	15.7904	15.51	15.5928
	1.29964	-0.508257	0.703071	High	MB0011	Proteine BIN1 CTL - GFP (echantillon 11)	BIN1-CTL			NaN	NaN	760.998	68	54	15553	1	693	77.1	6.01		17.2215	17.4792	17.8466	16.9944	16.9699	17.0581	16.7898	16.5317	17.5767	16.563	16.2413	16.7449	16.0286	16.2854	16.6903	17.2549	16.4484	17.0803	17.3291	17.2985	17.2578	16.3928	16.663	17.0982
+	4.50775	-0.51138	0.701551	High	P17661	Desmin OS=Homo sapiens OX=9606	DES	+	Cluster -801	4.51523	6.48148e-05	84.734	38	17	2222	13	470	53.5	5.27		23.3357	23.3459	23.3653	22.8009	22.8321	22.8797	22.6435	22.0014	22.867	22.3841	22.061	22.0865	22.3998	22.6185	22.5456	22.4997	22.437	22.4671	22.5877	22.5379	22.577	22.7907	22.6291	22.6007
	1.90657	-0.511447	0.701518	High	P18077	60S ribosomal protein L35a OS=Homo sapiens OX=9606	RPL35A			NaN	NaN	6.158	19	2	13	2	110	12.5	11.06		14.642	14.3738	14.3715	13.8147	14.081	13.9573	13.8776	16.0149	14.2237	13.819	13.8474	13.777	14.055	13.5517	13.6787	13.8234	13.6912	14.0421	15.7767	15.487	15.518	14.2027	13.6041	13.9559
	1.24243	-0.511901	0.701298	High	P18669	Phosphoglycerate mutase 1 OS=Homo sapiens OX=9606	PGAM1			NaN	NaN	37.056	39	7	51	7	254	28.8	7.18		17.2203	16.9559	17.334	16.3483	16.8645	16.7617	16.5968	16.5053	16.9577	16.3471	16.0393	16.0039	16.2266	16.6246	16.5972	16.5567	16.5521	16.4636	16.4741	16.6225	16.9	16.1628	16.1257	16.9876
	1.61466	-0.512397	0.701057	High	P51812	Ribosomal protein S6 kinase alpha-3 OS=Homo sapiens OX=9606	RPS6KA3			NaN	NaN	11.97	5	4	93	4	740	83.7	6.89		18.3808	18.3049	18.6792	17.766	18.0032	18.0585	18.0959	16.8713	17.9174	18.1581	18.2175	17.674	18.045	18.0492	17.7952	17.7232	17.6088	17.7815	18.2173	17.8504	18.1258	18.128	18.1645	17.5198
	1.45127	-0.513119	0.700706	High	Q16698	2,4-dienoyl-CoA reductase [(3E)-enoyl-CoA-producing], mitochondrial OS=Homo sapiens OX=9606	DECR1			NaN	NaN	6.87	7	2	45	2	335	36	9.28		16.7178	16.6709	16.3217	15.8476	16.1961	16.1273	16.2137	15.7678	16.3117	15.9949	15.9597	15.5951	16.0908	16.1805	16.247	15.7098	15.8275	15.7216	16.2874	16.3111	16.257	16.2603	16.2036	15.8914
	1.29694	-0.513689	0.700429	High	Q13547	Histone deacetylase 1 OS=Homo sapiens OX=9606	HDAC1	+	Cluster -800	4.3046	7.00219e-05	4.063	2	1	45	1	482	55.1	5.48		15.1849	15.3963	15.2249	14.459	15.0613	14.7448	15.054	14.6624	14.6411	14.9405	14.9025	14.7394	15.0514	15.0845	15.066	15.6912	15.5981	15.7882	15.1934	15.4128	15.2242	15.4658	15.2839	15.1544
+	3.12547	-0.513699	0.700424	High	P62241	40S ribosomal protein S8 OS=Homo sapiens OX=9606	RPS8	+	Cluster -800	10.145	0	29.54	30	6	385	6	208	24.2	10.32		20.3391	20.1613	20.1957	19.732	19.6991	19.7239	19.8926	18.9076	19.8229	19.8998	19.8612	19.7518	19.8852	19.9884	19.976	20.43	20.3499	20.5356	20.8479	20.8184	20.8344	20.0659	19.9957	19.5045
	1.43873	-0.514051	0.700253	High	Q13131	5'-AMP-activated protein kinase catalytic subunit alpha-1 OS=Homo sapiens OX=9606	PRKAA1	+	Cluster -803	4.42232	7.22348e-05	3.122	2	1	52	1	559	64	8.12		14.7318	15.0453	15.0485	14.6251	14.4723	14.186	15.0954	14.7068	15.1601	14.6396	14.9962	14.7499	14.7991	14.8543	14.7253	14.0778	13.7836	14.2127	14.9875	14.7952	15.0111	15.0563	15.1174	14.9332
+	2.27272	-0.515233	0.69968	High	P60468	Protein transport protein Sec61 subunit beta OS=Homo sapiens OX=9606	SEC61B	+	Cluster -801	3.49988	0.000271429	6.432	22	2	90	2	96	10	11.56		17.4677	17.2227	17.1684	16.7777	16.7977	16.7377	16.7839	15.9651	16.6871	16.5183	16.1316	16.2908	16.2845	16.4574	16.2358	16.3457	16.3029	16.3461	16.54	16.3851	16.4973	16.8159	16.6849	16.2788
+	2.65472	-0.516579	0.699028	High	P42224	Signal transducer and activator of transcription 1-alpha/beta OS=Homo sapiens OX=9606	STAT1	+	Cluster -803	5.08449	5.40541e-05	61.813	21	14	625	14	750	87.3	6.05		21.0983	21.0883	20.901	20.5082	20.5785	20.4511	20.8338	20.1716	20.7076	20.9735	20.5229	20.3927	20.7361	20.9098	20.7733	20.0813	19.9175	20.0811	20.6072	20.5031	20.6209	20.5707	20.6738	20.5375
+	3.45177	-0.516962	0.698842	High	P36957	Dihydrolipoyllysine-residue succinyltransferase component of 2-oxoglutarate dehydrogenase complex, mitochondrial OS=Homo sapiens OX=9606	DLST			NaN	NaN	9.536	6	2	46	2	453	48.7	8.95		16.4279	16.4066	16.3019	15.8646	15.9024	15.8185	15.9794	15.2901	15.7642	15.618	15.7486	15.6552	15.4897	15.3555	16.0988	15.3428	15.4313	14.9821	16.0131	16.0821	16.0992	15.6184	16.1173	15.9558
	1.9454	-0.517195	0.698729	High	P67809	Y-box-binding protein 1 OS=Homo sapiens OX=9606	YBX1	+	Cluster -800	4.70776	4.84262e-05	16.323	10	3	91	3	324	35.9	9.88		17.7609	17.4544	17.436	16.9617	17.1287	17.0093	17.1503	16.9818	17.356	14.9339	14.8231	14.9481	16.5284	17.5762	15.3583	18.6887	18.6337	18.5843	18.5712	18.5374	18.5742	16.367	15.0166	16.8264
+	2.65105	-0.518944	0.697883	High	P62249	40S ribosomal protein S16 OS=Homo sapiens OX=9606	RPS16	+	Cluster -800	4.98653	5.2356e-05	14.099	20	3	215	3	146	16.4	10.21		20.4114	20.1789	20.2381	19.7142	19.7529	19.8045	19.8303	18.8064	19.742	19.624	19.1819	19.2112	19.4497	19.6489	19.548	20.0677	19.9569	19.9643	20.1002	19.9905	20.0022	19.6254	19.5226	19.0511
+	2.51274	-0.519326	0.697698	High	P49327	Fatty acid synthase OS=Homo sapiens OX=9606	FASN	+	Cluster -803	5.15802	4.46927e-05	134.024	17	31	1442	31	2511	273.3	6.44		21.7267	21.4618	21.5374	21.0368	21.0358	21.0953	21.4412	20.6498	21.4318	21.1583	20.7721	20.8662	21.0102	21.1584	21.184	20.71	20.5587	20.5766	21.1322	21.2535	21.2924	21.2916	21.2558	20.9063
	1.59924	-0.522127	0.696345	High	Q5JWF2	Guanine nucleotide-binding protein G(s) subunit alpha isoforms XLas OS=Homo sapiens OX=9606	GNAS	+	Cluster -803	3.50464	0.000271914	20.075	5	5	209	5	1037	111	5.03		18.6051	18.9966	19.0195	18.2231	18.4401	18.3916	18.5243	17.6975	18.5049	18.1566	18.1674	18.1424	18.4628	18.6792	18.6202	17.9746	17.933	17.8649	18.3884	18.3856	18.3891	18.4524	18.3657	18.1338
+	3.54179	-0.522834	0.696004	High	Q9NSD9	Phenylalanine--tRNA ligase beta subunit OS=Homo sapiens OX=9606	FARSB	+	Cluster -803	8.29751	0	56.698	24	12	441	12	589	66.1	6.84		20.7933	20.9254	20.8253	20.2982	20.3612	20.3161	20.8655	20.1864	20.8015	20.4425	20.1937	20.191	20.2044	20.4168	20.4353	19.9292	19.7626	19.7823	20.5031	20.4985	20.5482	20.6541	20.5629	20.368
	1.42994	-0.525551	0.694694	High	P14868	Aspartate--tRNA ligase, cytoplasmic OS=Homo sapiens OX=9606	DARS1			NaN	NaN	15.813	12	6	98	6	501	57.1	6.55		17.64	18.1188	18.162	17.4248	17.4016	17.5178	17.5052	16.5101	17.5118	17.3767	17.1209	17.0594	17.2049	17.3974	17.3165	17.0585	17.1257	17.3133	17.511	17.5466	17.593	17.688	17.5749	17.1095
+	2.68265	-0.525574	0.694682	High	Q9Y285	Phenylalanine--tRNA ligase alpha subunit OS=Homo sapiens OX=9606	FARSA	+	Cluster -803	3.60949	0.000210909	44.304	22	8	232	8	508	57.5	7.8		20.166	19.9347	19.9873	19.5187	19.5358	19.4567	19.8697	19.2844	20.0486	19.6191	19.3584	19.5932	19.3666	19.6888	19.6096	19.1259	19.0935	19.2085	19.7742	19.587	19.8801	20.0279	19.6876	19.573
	1.80138	-0.528457	0.693296	High	P21281	V-type proton ATPase subunit B, brain isoform OS=Homo sapiens OX=9606	ATP6V1B2			NaN	NaN	8.102	7	3	28	3	511	56.5	5.81		16.5559	16.7212	16.2756	16.024	15.9796	15.9638	15.8625	14.5639	15.885	15.8098	15.8373	15.4223	15.8318	15.2102	15.8259	15.4273	15.4262	14.8277	15.8858	15.8485	15.9943	15.8626	15.9818	15.6813
	1.47163	-0.531083	0.692035	High	P62714	Serine/threonine-protein phosphatase 2A catalytic subunit beta isoform OS=Homo sapiens OX=9606	PPP2CB			NaN	NaN	48.514	28	5	491	4	309	35.6	5.43		18.9001	19.0375	19.038	18.1432	18.6651	18.5741	19.0231	17.8307	18.9574	18.593	18.2325	18.2627	18.5266	18.6168	18.6422	18.412	18.534	18.4516	18.8893	18.9939	18.8879	18.7848	18.5858	18.6909
+	2.37762	-0.532201	0.691499	High	P78559	Microtubule-associated protein 1A OS=Homo sapiens OX=9606	MAP1A	+	Cluster -803	2.37186	0.0018908	24.719	4	9	188	9	2803	305.3	4.92		18.8031	18.8946	18.7803	18.1827	18.2412	18.4575	18.8817	17.6654	18.3822	18.2426	18.1949	18.0478	18.4776	18.6083	18.5158	18.2434	18.1936	18.2172	18.7981	18.8297	18.7654	18.7943	18.7832	18.0756
	1.79565	-0.532206	0.691497	High	O15143	Actin-related protein 2/3 complex subunit 1B OS=Homo sapiens OX=9606	ARPC1B	+	Cluster -803	1.6673	0.00945455	7.555	8	2	35	2	372	40.9	8.35		16.838	16.6363	16.6295	15.9445	16.3131	16.2495	16.369	15.0114	16.1655	16.2463	16.0754	15.8705	16.2692	16.3732	16.3304	15.9075	15.7946	15.7489	16.4298	16.4528	16.3006	16.2908	16.1423	15.4484
+	1.98385	-0.533623	0.690818	High	Q14142	Tripartite motif-containing protein 14 OS=Homo sapiens OX=9606	TRIM14	+	Cluster -803	9.27454	0	11.772	10	4	92	4	442	49.7	7.87		17.5151	17.8875	17.8219	17.2131	17.2457	17.1648	17.3808	16.6586	17.3596	17.6937	17.3605	17.223	17.3954	17.6618	17.5113	16.2629	16.2618	16.5353	17.7046	17.6603	17.6917	17.997	17.8798	17.6145
	1.65613	-0.533736	0.690764	High	P04843	Dolichyl-diphosphooligosaccharide--protein glycosyltransferase subunit 1 OS=Homo sapiens OX=9606	RPN1	+	Cluster -803	2.59984	0.0011506	16.677	8	4	183	4	607	68.5	6.38		17.5486	18.0277	17.8443	17.3544	17.2686	17.1963	17.0198	16.2309	16.5945	17.107	16.9734	16.7273	16.9688	17.2948	17.3813	17.2456	17.0264	17.0744	17.2638	17.236	17.2864	17.4168	17.4351	17.0574
	0.819647	-0.535511	0.689914	High	Q9H3K6	BolA-like protein 2 OS=Homo sapiens OX=9606	BOLA2B	+	Cluster -803	3.5822	0.000216606	8.357	43	3	104	3	86	10.1	6.52		17.6869	17.6275	18.5506	17.4817	17.4579	17.3188	18.4008	17.4396	18.1492	17.9318	17.5942	17.1402	17.6411	17.9163	17.8318	16.6476	16.5938	16.7065	17.7317	17.8133	17.669	17.3129	17.8682	17.3287
+	3.92816	-0.544144	0.685798	High	P46063	ATP-dependent DNA helicase Q1 OS=Homo sapiens OX=9606	RECQL	+	Cluster -803	6.7565	5.02092e-05	17.03	8	5	183	5	649	73.4	7.88		18.0465	17.944	18.0425	17.438	17.4789	17.4837	17.6243	16.8259	17.4032	17.3973	17.2136	17.1581	17.4625	17.5908	17.4627	17.0191	16.9236	17.0481	17.7021	17.6072	17.6261	17.7499	17.6436	17.3621
	1.54769	-0.544147	0.685797	High	P48668	Keratin, type II cytoskeletal 6C OS=Homo sapiens OX=9606	KRT6C	+	Cluster -801	15.5758	0	324.618	65	47	6319	1	564	60	8	Met-loss+Acetyl [N-Term]	17.1001	17.5625	17.5714	16.8202	16.9569	16.8246	12.5157	11.9034	12.7213	14.7454	14.5896	14.6435	13.2672	13.6041	13.3306	14.2209	14.4889	14.55	13.0192	13.0833	13.0534	12.4843	12.811	12.4553
	1.00699	-0.54784	0.684044	High	O15371	Eukaryotic translation initiation factor 3 subunit D OS=Homo sapiens OX=9606	EIF3D			NaN	NaN	3.642	2	1	15	1	548	63.9	6.05		15.783	15.1106	15.1835	14.9135	14.5331	14.9869	15.0586	13.5876	15.0695	14.3822	14.1503	14.5585	14.6988	14.8934	14.6177	14.4524	14.1982	14.3694	14.6582	14.6411	14.5361	14.7162	14.5699	14.2513
	1.60034	-0.550704	0.682687	High	A0A0G2JNQ3	Heterogeneous nuclear ribonucleoprotein C-like 2 OS=Homo sapiens OX=9606	HNRNPCL2	+	Cluster -800	12.3108	0	9.299	10	3	80	3	293	32	5.43		16.8992	17.0641	17.2576	16.5713	16.297	16.7006	17.3887	16.521	17.2058	16.1873	15.8473	15.5432	16.4787	16.5912	16.6026	18.7487	18.566	18.5683	16.401	16.4041	16.3991	16.7392	16.7811	16.5684
	0.410409	-0.551166	0.682469	High	P53701	Holocytochrome c-type synthase OS=Homo sapiens OX=9606	HCCS			NaN	NaN	2.945	4	1	9	1	268	30.6	6.68		14.5235	13.4407	14.4448	14.0409	12.6819	14.0326	14.2016	13.1861	14.0892	14.2361	14.0345	13.666	14.06	14.1907	14.0176	13.4165	13.5398	13.2601	14.3435	14.2272	14.3971	14.1648	14.1564	13.5532
+	3.82255	-0.552598	0.681791	High	P46940	Ras GTPase-activating-like protein IQGAP1 OS=Homo sapiens OX=9606	IQGAP1	+	Cluster -803	9.24922	0	78.447	15	19	677	19	1657	189.1	6.48	Met-loss+Acetyl [N-Term]	20.0532	20.1192	20.0553	19.4591	19.5425	19.5683	20.3313	19.5048	20.143	19.9945	19.8354	19.7495	19.3881	19.4976	19.4906	18.7311	18.8725	19.1729	19.7746	19.8488	19.8527	19.9738	19.8858	19.7078
	1.02045	-0.558041	0.679224	High	P08238	Heat shock protein HSP 90-beta OS=Homo sapiens OX=9606	HSP90AB1			NaN	NaN	80.214	28	19	1279	9	724	83.2	5.03		20.4747	20.0025	20.2833	20.1288	19.5008	19.4569	19.4694	18.7825	19.5036	19.1809	19.2077	19.1289	19.3606	19.4232	19.3761	19.7114	19.226	19.2876	19.4448	19.3802	19.4639	19.4545	19.4277	19.0413
+	3.2427	-0.558846	0.678845	High	P48681	Nestin OS=Homo sapiens OX=9606	NES	+	Cluster -803	5.22836	4.54545e-05	117.701	15	22	1207	22	1621	177.3	4.36		22.1941	22.0909	22.1166	21.4939	21.656	21.5752	22.0386	21.3645	22.0536	21.6752	21.4428	21.4298	21.675	21.7899	21.6878	21.539	21.4595	21.5555	21.6923	21.7002	21.7109	21.814	21.7435	21.6005
	0.380498	-0.561159	0.677758	High	Q06033	Inter-alpha-trypsin inhibitor heavy chain H3 OS=Homo sapiens OX=9606	ITIH3			NaN	NaN	4.075	1	1	11	1	890	99.8	5.74		13.8101	15.1358	15.8987	14.2478	14.3135	14.5998	14.7645	14.1783	15.6585	14.5172	14.3573	14.023	14.5991	14.6554	15.0004	14.9898	14.6753	14.4163	15.0919	14.7783	14.9396	14.826	14.8635	14.9991
	0.431911	-0.561751	0.677479	High	Q13418	Integrin-linked protein kinase OS=Homo sapiens OX=9606	ILK			NaN	NaN	5.05	6	2	8	2	452	51.4	8.07		16.3609	16.1269	14.6635	14.8297	15.2599	15.3765	13.6239	15.8468	15.5954	14.5526	14.0791	13.1138	12.6696	14.366	12.7193	13.5719	13.3666	13.82	12.2269	14.4214	14.7118	15.355	14.7345	16.1698
+	3.74073	-0.561892	0.677413	High	Q15404	Ras suppressor protein 1 OS=Homo sapiens OX=9606	RSU1	+	Cluster -803	4.28386	6.91145e-05	4.95	6	2	70	2	277	31.5	8.65		16.7638	16.7863	16.8784	16.2235	16.2941	16.2252	16.5833	15.8454	16.5445	16.4508	16.44	16.4663	16.1995	16.2548	16.4359	16.2729	16.3324	16.5587	16.5744	16.4499	16.5253	16.6684	16.6936	16.2643
+	2.80201	-0.563641	0.676593	High	P39019	40S ribosomal protein S19 OS=Homo sapiens OX=9606	RPS19	+	Cluster -800	10.6669	0	7.816	12	2	138	2	145	16.1	10.32		18.7061	18.4644	18.5298	18.0291	18.0042	17.9761	18.1736	17.0805	18.0417	17.8737	17.6254	17.6347	17.9573	17.9684	17.965	19.1391	19.0673	19.1073	18.6574	18.6416	18.6867	17.7987	17.7339	17.256
+	1.87709	-0.566694	0.675162	High	P48059	LIM and senescent cell antigen-like-containing domain protein 1 OS=Homo sapiens OX=9606	LIMS1	+	Cluster -803	3.98516	0.00012024	3.056	4	1	26	1	325	37.2	8.05		15.8725	15.5495	15.7773	15.1055	15.0442	15.3494	15.4658	14.6899	15.4579	15.3632	15.4324	15.2004	15.3318	15.3836	15.3421	14.7157	14.9537	14.8895	15.212	15.3764	15.2654	15.5648	15.5114	15.044
+	3.25127	-0.566925	0.675054	High	P49841	Glycogen synthase kinase-3 beta OS=Homo sapiens OX=9606	GSK3B			NaN	NaN	3.891	6	1	19	1	420	46.7	8.78		15.5332	15.3708	15.404	14.9181	14.866	14.8231	15.7237	12.6692	15.4594	15.2041	14.7921	14.7287	15.0499	15.2081	15.1694	14.3561	13.8724	14.3636	15.1485	15.1912	15.1691	15.2234	15.1696	13.5179
	1.51074	-0.568615	0.674264	High	Q9UHD8	Septin-9 OS=Homo sapiens OX=9606	SEPTIN9			NaN	NaN	5.874	4	2	40	2	586	65.4	8.97		16.6499	16.1935	16.3284	16.0237	15.648	15.7943	15.0687	15.648	15.0121	14.3963	15.0308	13.9333	14.6274	15.7215	15.9347	15.6818	14.7142	15.904	16.1702	16.4419	16.1989	16.1201	15.8754	15.7538
+	3.39883	-0.569754	0.673732	High	P60709	Actin, cytoplasmic 1 OS=Homo sapiens OX=9606	ACTB	+	Cluster -803	1.94596	0.00464482	205.964	66	22	3237	8	375	41.7	5.48		22.652	22.6917	22.8173	22.1454	22.1267	22.1797	22.3456	21.2632	22.1964	22.0757	21.9095	21.8534	22.1873	22.3464	22.2634	22.0607	22.0289	22.0372	22.2961	22.3129	22.214	22.3542	22.2991	21.8763
+	1.91004	-0.57023	0.673509	High	O43813	Glutathione S-transferase LANCL1 OS=Homo sapiens OX=9606	LANCL1	+	Cluster -803	2.3003	0.00217305	15.373	11	4	183	4	399	45.3	7.75		18.8133	18.6398	18.5155	17.9747	17.9993	18.2839	18.3749	17.6063	18.1991	18.173	18.0695	18.0459	18.0965	18.3453	18.1959	17.847	17.9013	17.8116	18.1494	18.2968	18.2264	18.1842	18.1897	17.9257
	1.79704	-0.570761	0.673262	High	P30626	Sorcin OS=Homo sapiens OX=9606	SRI	+	Cluster -801	2.06404	0.00362315	4.751	11	2	34	2	198	21.7	5.59		17.3104	16.9076	17.0876	16.3683	16.6228	16.6021	16.8162	15.9113	16.8065	16.0746	15.9966	16.001	16.6401	16.5858	16.5504	16.1854	16.1465	16.2099	16.8562	16.502	16.5665	16.6502	16.551	16.1862
+	3.20884	-0.574107	0.671702	High	Q9Y3F4	Serine-threonine kinase receptor-associated protein OS=Homo sapiens OX=9606	STRAP			NaN	NaN	5.681	7	2	58	2	350	38.4	5.12		16.5018	16.4641	16.6194	15.8863	15.9695	16.0072	16.0989	15.6903	16.0134	16.0284	15.7356	15.8885	15.9418	15.9331	16.0127	15.7358	15.727	15.9638	15.7726	15.974	16.1304	15.9779	16.0895	15.8192
	1.75982	-0.576475	0.6706	High	P05161	Ubiquitin-like protein ISG15 OS=Homo sapiens OX=9606	ISG15	+	Cluster -801	3.7486	0.000159091	19.967	18	2	185	2	165	17.9	7.44		20.2086	19.7494	19.9088	19.3346	19.3047	19.498	19.8874	18.9018	19.7651	19.0337	19.0124	18.3529	18.8592	19.146	19.1772	18.8865	18.6956	18.5529	19.4731	19.3736	19.5278	18.5926	18.8042	18.6098
+	3.11717	-0.576627	0.67053	High	P07203	Glutathione peroxidase 1 OS=Homo sapiens OX=9606	GPX1	+	Cluster -803	2.1997	0.00265928	8.481	14	3	30	3	203	22.1	6.55		17.2638	17.4109	17.3711	16.685	16.8306	16.8003	17.0061	16.2687	17.1055	16.5049	16.5704	16.5192	16.5625	16.7699	16.6439	16.448	16.4639	16.5097	17.0812	16.6409	16.6738	17.1399	17.1661	16.6102
	0.271687	-0.577149	0.670287	High	Q8TF09	Dynein light chain roadblock-type 2 OS=Homo sapiens OX=9606	DYNLRB2			NaN	NaN	2.763	13	1	7	1	96	10.8	7.5		14.9371	15.6585	12.8474	13.8017	14.1402	13.7698	14.3832	13.6993	14.2165	14.3481	13.7197	13.7996	13.9755	14.3271	14.5128	14.3	13.9424	14.3604	14.2145	14.2035	14.6801	14.2396	14.0518	14.5362
	1.45312	-0.577234	0.670248	High	P00492	Hypoxanthine-guanine phosphoribosyltransferase OS=Homo sapiens OX=9606	HPRT1	+	Cluster -803	4.19378	9.20502e-05	21.344	22	4	88	4	218	24.6	6.68		18.3441	18.492	17.8971	17.6825	17.5819	17.7371	18.0856	17.4198	18.0845	17.6357	17.442	17.538	17.6848	17.8229	17.8539	17.0665	17.0231	17.1756	17.8062	17.8868	17.9121	17.8547	17.9361	17.6837
+	2.9394	-0.581333	0.668346	High	P62851	40S ribosomal protein S25 OS=Homo sapiens OX=9606	RPS25	+	Cluster -800	6.44123	4.6332e-05	18.327	24	4	464	4	125	13.7	10.11		20.1077	20.1652	20.1072	19.4274	19.5481	19.6606	19.819	19.1276	19.7329	19.2906	19.1972	19.3803	19.3577	19.3928	19.3181	20.1456	20.008	20.1023	19.885	19.9034	19.9229	19.4082	19.3883	19.2805
+	1.83413	-0.582853	0.667642	High	Q9UI30	Multifunctional methyltransferase subunit TRM112-like protein OS=Homo sapiens OX=9606	TRMT112	+	Cluster -803	4.75569	4.92611e-05	5.762	11	1	30	1	125	14.2	5.26		14.9985	15.1767	14.8293	14.6175	14.3024	14.336	14.7537	13.8119	14.866	15.1035	14.8066	14.9581	14.9353	15.0012	14.7867	14.6858	14.998	15.1764	15.1854	15.1095	14.8581	15.4311	15.3315	14.9736
	0.386457	-0.590594	0.664069	High	Q86Y46	Keratin, type II cytoskeletal 73 OS=Homo sapiens OX=9606	KRT73	+	Cluster -803	2.27494	0.00228973	30.713	15	8	683	2	540	58.9	7.23		15.3994	15.713	17.3288	15.9728	15.1468	15.5498	12.6861	14.2041	14.485	15.8866	16.0431	16.0879	15.4343	15.0603	15.7392	15.9936	16.0464	16.238	15.654	15.7617	15.8858	16.1531	16.1388	15.8536
+	1.98124	-0.593178	0.662881	High	P06748	Nucleophosmin OS=Homo sapiens OX=9606	NPM1	+	Cluster -800	8.02853	0	43.173	26	5	363	5	294	32.6	4.78		19.4206	19.172	19.6219	18.8149	18.8263	18.7937	18.8134	18.3215	19.1257	18.7165	18.4968	18.4591	18.9592	19.1014	19.0312	19.9652	19.9651	19.8267	19.6358	19.6781	19.7575	19.0402	19.0061	18.7814
+	3.6595	-0.594495	0.662276	High	P47755	F-actin-capping protein subunit alpha-2 OS=Homo sapiens OX=9606	CAPZA2	+	Cluster -803	5.12227	4.43213e-05	58.253	41	7	511	5	286	32.9	5.85	Met-loss+Acetyl [N-Term]	20.2617	20.2611	20.2267	19.5657	19.69	19.7104	20.0659	19.384	19.9685	19.7931	19.6603	19.5574	19.6447	19.9102	19.8387	19.671	19.6238	19.6011	19.982	20.0547	20.0805	20.0779	20.1444	19.8186
	1.37729	-0.595976	0.661597	High	P05387	60S acidic ribosomal protein P2 OS=Homo sapiens OX=9606	RPLP2	+	Cluster -801	2.62415	0.00106667	19.304	38	3	88	3	115	11.7	4.54		16.8986	16.9827	17.5154	16.4284	16.5476	16.6327	14.4538	13.5173	14.1857	14.315	16.2911	16.3063	14.0788	14.3291	15.8295	16.0495	15.8579	15.8591	16.3982	16.3406	16.4047	15.6483	15.4522	13.5911
+	3.47932	-0.59719	0.66104	High	P82650	28S ribosomal protein S22, mitochondrial OS=Homo sapiens OX=9606	MRPS22	+	Cluster -800	12.4345	0	4.562	3	1	13	1	360	41.3	7.9		14.9664	14.9147	15.0487	14.4454	14.3644	14.3285	14.6526	13.7844	14.4829	14.4469	14.5733	14.3834	14.9234	14.7697	14.8388	16.3563	16.4497	16.5022	15.2732	15.1921	15.3604	15.0029	15.0167	14.5412
+	1.86739	-0.598451	0.660463	High	P62888	60S ribosomal protein L30 OS=Homo sapiens OX=9606	RPL30	+	Cluster -800	7.9423	0	22.588	34	3	244	3	115	12.8	9.63		18.4965	18.7142	18.8684	17.9166	18.2273	18.1399	18.2917	17.4125	18.1034	17.9857	17.8796	17.6808	17.9561	18.0999	17.9274	18.0115	17.889	17.9358	19.1711	19.0902	19.2711	17.9926	17.8068	17.6862
+	3.40597	-0.600831	0.659374	High	Q9UJ70	N-acetyl-D-glucosamine kinase OS=Homo sapiens OX=9606	NAGK	+	Cluster -800	8.5161	0	19.671	18	5	208	5	344	37.4	6.24		18.3905	18.3362	18.2175	17.6762	17.743	17.7226	17.8824	16.8025	17.8101	17.7828	17.6454	17.5977	17.7706	17.8352	17.7899	18.4986	18.4064	18.4493	17.9761	17.9926	17.9826	17.774	17.7795	17.3821
+	2.28528	-0.601823	0.658921	High	P05109	Protein S100-A8 OS=Homo sapiens OX=9606	S100A8	+	Cluster -801	11.6169	0	50.317	46	6	501	6	93	10.8	7.03		22.0346	22.2053	21.9379	21.3679	21.3971	21.6073	19.4002	18.1313	19.0592	18.6856	18.6502	18.8874	18.4986	18.6682	18.8645	18.5195	18.4346	19.0564	19.3348	19.2254	19.7889	18.1093	18.174	17.9745
+	2.09842	-0.602943	0.65841	High	Q9UNP9	Peptidyl-prolyl cis-trans isomerase E OS=Homo sapiens OX=9606	PPIE	+	Cluster -803	7.0529	5.35714e-05	2.902	3	1	32	1	301	33.4	5.6		16.6392	16.8771	16.9334	16.0513	16.2623	16.3272	15.6597	15.1454	15.7839	16.5184	16.5482	16.508	16.4227	16.4669	16.4545	15.7682	15.8919	15.9038	16.014	16.2065	16.3705	16.8631	16.65	16.2798
	1.44871	-0.607705	0.65624	High	P36952	Serpin B5 OS=Homo sapiens OX=9606	SERPINB5	+	Cluster -801	6.84618	5.15021e-05	55.313	40	13	111	13	375	42.1	6.05		16.5664	16.9157	16.7641	15.8387	16.1709	16.4135	12.7431	12.3171	12.5035	13.4013	13.4045	12.6393	14.7238	14.8341	14.9994	13.4445	12.873	12.5296	14.3313	13.3451	13.7045	13.6933	14.0105	11.7464
	1.64169	-0.609649	0.655356	High	P09104	Gamma-enolase OS=Homo sapiens OX=9606	ENO2	+	Cluster -801	5.11919	4.41989e-05	11.514	7	2	32	1	434	47.2	5.03		18.5227	18.5812	18.7862	17.9682	17.7916	18.3015	17.9454	17.0243	17.8472	17.6483	17.3836	17.3462	17.529	17.5782	17.38	17.3932	17.3831	17.4905	17.4648	17.5552	17.5585	17.6952	17.4236	17.181
+	3.6982	-0.61022	0.655097	High	P04083	Annexin A1 OS=Homo sapiens OX=9606	ANXA1	+	Cluster -803	5.05481	5.37634e-05	69.447	36	12	558	12	346	38.7	7.02		21.7331	21.5986	21.7347	21.0551	21.0825	21.0982	21.1414	20.2798	20.9727	20.9553	20.6571	20.7243	21.1718	21.3459	21.2876	20.6947	20.5907	20.7603	21.1605	21.1559	21.2161	21.2553	21.338	20.778
	1.25891	-0.610614	0.654918	High	P18031	Tyrosine-protein phosphatase non-receptor type 1 OS=Homo sapiens OX=9606	PTPN1			NaN	NaN	9.851	10	4	49	4	435	49.9	6.27		17.6568	17.6973	18.3355	17.2801	17.1863	17.3914	17.1726	16.0184	16.6843	16.7746	16.6879	16.6494	16.6252	17.0977	16.7251	16.8199	16.8916	16.5091	16.7509	16.9786	17.1853	17.1756	17.1898	16.5511
+	2.58674	-0.610924	0.654777	High	P61604	10 kDa heat shock protein, mitochondrial OS=Homo sapiens OX=9606	HSPE1	+	Cluster -801	1.87411	0.00570246	5.29	20	2	60	2	102	10.9	8.92		17.4727	17.3305	17.1768	16.7127	16.7727	16.6618	16.7621	15.4223	16.5931	16.6719	16.2649	16.5518	16.6528	16.7872	16.8358	16.8316	16.8098	16.8004	16.3782	16.7641	16.6368	16.6248	16.6423	16.3415
	1.32306	-0.611654	0.654446	High	P31146	Coronin-1A OS=Homo sapiens OX=9606	CORO1A			NaN	NaN	3.63	2	1	26	1	461	51	6.68		14.8245	15.0303	15.124	13.9912	14.5224	14.6303	14.5344	13.4633	14.6632	14.2347	14.0404	14.2504	14.0481	14.3171	14.4039	14.4581	14.504	14.6072	14.4561	14.5455	14.4379	14.4024	14.3864	14.1815
	1.60567	-0.613548	0.653587	High	P31350	Ribonucleoside-diphosphate reductase subunit M2 OS=Homo sapiens OX=9606	RRM2	+	Cluster -803	3.33016	0.000368601	4.647	3	1	39	1	389	44.8	5.38		15.3129	15.4352	15.6698	14.5787	15.0096	14.9889	15.5072	14.7679	15.2192	14.9484	14.9044	14.963	14.9517	15.1889	15.2076	14.7096	14.3544	14.7566	14.8071	15.0138	15.0645	15.3043	15.5276	15.3259
+	3.19393	-0.614805	0.653018	High	Q15181	Inorganic pyrophosphatase OS=Homo sapiens OX=9606	PPA1	+	Cluster -803	5.02746	5.27704e-05	19.193	26	6	234	5	289	32.6	5.86		18.8168	18.7467	18.6719	18.1067	18.0618	18.2225	18.1762	17.5027	18.2377	18.2974	18.2181	18.1738	18.0557	18.2157	18.118	18.2146	18.2216	18.3036	18.3045	18.3539	18.411	18.4355	18.3442	18.0425
+	2.66163	-0.615129	0.652872	High	Q96MW1	Coiled-coil domain-containing protein 43 OS=Homo sapiens OX=9606	CCDC43	+	Cluster -803	2.67874	0.000952672	3.39	5	1	24	1	224	25.2	4.92		15.8333	15.7184	15.6221	15.1694	14.9835	15.1755	15.4896	14.7549	15.187	14.9527	15.0507	14.8405	14.8836	14.7631	14.8256	14.9137	14.8038	14.8198	15.264	15.188	15.4285	15.3165	15.5318	15.0903
+	2.21657	-0.615188	0.652845	High	P62826	GTP-binding nuclear protein Ran OS=Homo sapiens OX=9606	RAN			NaN	NaN	11.561	15	3	238	3	216	24.4	7.49		19.3094	19.0961	18.911	18.5078	18.4621	18.5011	18.4232	17.2254	18.2281	18.4802	17.8087	17.8192	18.3203	18.3229	18.2389	18.185	18.3003	18.3836	18.5024	18.3006	18.3689	18.3204	18.3149	17.7176
+	2.68796	-0.619989	0.650676	High	P50454	Serpin H1 OS=Homo sapiens OX=9606	SERPINH1			NaN	NaN	46.501	32	10	368	10	418	46.4	8.69		20.1294	19.9479	19.9305	19.266	19.4216	19.4603	19.6063	19.243	19.4032	19.5148	19.2848	19.1357	19.6406	19.674	19.6364	19.3777	19.2621	19.3162	19.5541	19.5013	19.5449	19.5147	19.5716	19.4444
+	3.82189	-0.622152	0.649701	High	Q9H2U2	Inorganic pyrophosphatase 2, mitochondrial OS=Homo sapiens OX=9606	PPA2	+	Cluster -803	5.39488	3.53982e-05	19.622	22	6	206	5	334	37.9	7.39		18.8163	18.6661	18.7643	18.1198	18.1223	18.1381	18.3945	17.3717	18.2658	18.3721	18.1297	18.2527	18.1915	18.3807	18.2758	18.1729	18.0788	18.1812	18.4969	18.5145	18.4753	18.6184	18.65	18.302
	1.62032	-0.622263	0.649651	High	Q9BWM7	Sideroflexin-3 OS=Homo sapiens OX=9606	SFXN3	+	Cluster -803	3.03433	0.000485437	14.509	14	4	133	3	321	35.5	9.1		16.8558	17.1709	17.2643	16.2311	16.5493	16.6439	16.8753	16.2451	16.9033	16.3299	16.3903	16.4547	16.7201	16.7495	16.8418	16.2615	16.1352	16.324	16.9785	16.892	16.9302	16.8649	16.9967	16.4648
+	2.82116	-0.625972	0.647983	High	Q9Y3Z3	Deoxynucleoside triphosphate triphosphohydrolase SAMHD1 OS=Homo sapiens OX=9606	SAMHD1	+	Cluster -803	5.29987	4.61095e-05	34.644	21	11	280	11	626	72.2	7.14		19.7104	19.4516	19.5985	18.9624	18.9068	19.0134	19.0913	18.3366	18.9755	18.9023	18.7338	18.6514	18.8738	18.9451	18.9617	18.4983	18.5033	18.5589	19.0515	18.9129	18.9657	19.3402	19.124	18.8222
	0.751483	-0.626753	0.647632	High	P05388	60S acidic ribosomal protein P0 OS=Homo sapiens OX=9606	RPLP0	+	Cluster -800	2.88816	0.000644338	37.115	30	7	341	7	317	34.3	5.97		19.3512	19.5388	19.7056	19.215	19.3307	18.1697	19.4998	17.8819	18.9905	19.0133	18.3376	18.1842	18.3576	19.3713	19.3448	18.8024	19.4712	18.7832	20.9137	21.101	20.42	19.3447	19.1974	18.436
+	3.06728	-0.627722	0.647198	High	P09914	Interferon-induced protein with tetratricopeptide repeats 1 OS=Homo sapiens OX=9606	IFIT1	+	Cluster -803	4.24917	7.64331e-05	53.106	24	9	368	9	478	55.3	7.2		20.1831	20.3197	20.1689	19.4947	19.6534	19.6404	19.5958	19.0265	19.5549	19.6221	19.5114	19.5263	19.4625	19.6155	19.5763	19.2475	19.0964	19.1333	19.6771	19.7341	19.7668	19.5703	19.467	19.3549
+	2.38936	-0.629452	0.646422	High	P62829	60S ribosomal protein L23 OS=Homo sapiens OX=9606	RPL23	+	Cluster -803	4.39928	7.12695e-05	35.959	38	4	673	4	140	14.9	10.51		20.6561	20.684	20.6923	19.8424	20.1939	20.1078	20.606	19.733	20.6029	20.5286	20.1547	20.0854	20.3792	20.5152	20.3719	20.2515	20.2402	20.3079	20.9094	20.6647	20.7514	20.6344	20.5563	19.9505
+	3.58623	-0.635858	0.643558	High	Q9NZL9	Methionine adenosyltransferase 2 subunit beta OS=Homo sapiens OX=9606	MAT2B	+	Cluster -803	1.91473	0.00513394	24.238	24	6	193	6	334	37.5	7.36		18.3899	18.3547	18.4195	17.6949	17.7127	17.8489	18.1969	17.3195	18.0181	17.9329	17.5853	17.7574	17.7793	18.0235	17.9673	17.2493	17.8069	17.6292	18.1582	18.1034	18.1303	18.1304	18.0405	17.7697
+	1.84897	-0.636626	0.643215	High	P23258	Tubulin gamma-1 chain OS=Homo sapiens OX=9606	TUBG1	+	Cluster -803	2.3773	0.00186475	6.031	5	2	63	2	451	51.1	6.14		15.9575	16.3678	16.1695	15.4636	15.4023	15.719	15.9866	14.7139	15.714	15.75	15.4993	15.604	16.1499	15.9806	16.1052	15.392	15.5429	15.6171	15.865	15.9957	15.9007	15.766	15.7886	15.8726
+	2.01828	-0.639132	0.642099	High	P23396	40S ribosomal protein S3 OS=Homo sapiens OX=9606	RPS3	+	Cluster -800	7.25361	5.55556e-05	41.349	46	9	449	9	243	26.7	9.66		20.0944	20.4795	20.1473	19.4752	19.6947	19.6338	19.5997	18.9436	19.6364	19.4679	19.4929	19.2934	19.2865	19.4242	19.4034	20.3294	20.45	20.3551	20.1785	20.2098	20.39	19.7577	19.5142	19.4025
	1.13338	-0.6394	0.64198	High	P62318	Small nuclear ribonucleoprotein Sm D3 OS=Homo sapiens OX=9606	SNRPD3	+	Cluster -800	1.92874	0.00487728	7.006	15	2	73	2	126	13.9	10.32		16.943	16.0422	16.5576	15.7833	15.8964	15.9449	16.1194	15.0627	16.0273	15.6958	15.4621	15.319	15.7363	16.0355	15.7016	16.5046	16.3441	16.2005	15.8728	15.8322	15.8758	15.9196	15.8764	15.5912
+	2.47758	-0.640115	0.641662	High	Q9UBV8	Peflin OS=Homo sapiens OX=9606	PEF1	+	Cluster -803	2.02502	0.00395213	2.792	4	1	27	1	284	30.4	6.54		16.0858	15.7502	16.0158	15.3194	15.3063	15.3057	15.6449	14.7587	15.6291	15.2278	15.378	15.4285	15.3429	15.3553	15.3767	14.9963	14.931	14.6492	15.3873	15.6197	15.317	15.2548	15.3431	15.1477
+	2.19904	-0.640889	0.641318	High	P52565	Rho GDP-dissociation inhibitor 1 OS=Homo sapiens OX=9606	ARHGDIA	+	Cluster -803	2.22421	0.00252778	9.695	30	3	41	3	204	23.2	5.11	Met-loss+Acetyl [N-Term]	14.8182	14.8003	14.6898	14.0238	14.0028	14.3591	14.7007	13.2153	14.8627	14.3817	14.1011	13.4642	14.4198	14.6144	14.6212	14.4252	14.2444	14.0837	15.4073	14.66	14.5344	15.1124	15.3753	14.8091
	1.66208	-0.642651	0.640535	High	Q96HE7	ERO1-like protein alpha OS=Homo sapiens OX=9606	ERO1A	+	Cluster -803	2.81823	0.000722135	9.061	7	3	56	3	468	54.4	5.68		17.1554	16.647	16.6805	16.1658	16.0857	16.3035	16.5401	15.647	16.2978	16.3471	16.0339	16.06	16.2608	16.1451	16.3875	15.1847	14.9718	15.1997	15.6201	16.6442	15.7395	15.901	16.4967	16.2249
+	3.22906	-0.644121	0.639883	High	P61353	60S ribosomal protein L27 OS=Homo sapiens OX=9606	RPL27	+	Cluster -800	13.4994	0	18.221	15	2	226	2	136	15.8	10.56		18.537	18.3176	18.4024	17.7501	17.795	17.7795	18.0155	17.142	17.8221	17.7412	17.6283	17.4958	17.818	17.9915	17.9671	18.345	18.3267	18.419	19.8488	19.7711	19.7928	18.1508	18.058	17.5496
	1.34519	-0.644159	0.639866	High	Q9Y266	Nuclear migration protein nudC OS=Homo sapiens OX=9606	NUDC	+	Cluster -801	1.73677	0.00800504	13.468	12	4	129	4	331	38.2	5.38		17.6605	17.2291	17.3089	17.0358	16.8121	16.4182	17.5335	16.235	17.2137	16.3332	15.9341	15.8104	16.3917	16.375	17.106	16.1418	16.7445	16.9921	16.2282	16.2487	16.0708	16.4379	16.1042	16.4895
	1.64084	-0.645566	0.639242	High	P46777	60S ribosomal protein L5 OS=Homo sapiens OX=9606	RPL5	+	Cluster -800	3.88075	0.00014902	29.858	30	7	186	7	297	34.3	9.72		18.0313	17.4963	17.5146	16.9662	17.1	17.0393	17.348	17.3723	17.8227	16.7397	17.0453	16.6159	16.9306	17.332	17.2152	17.5107	18.766	17.5898	19.1862	20.2622	18.9976	17.3623	17.1391	17.6374
	0.742383	-0.645637	0.639211	High	P05023	Sodium/potassium-transporting ATPase subunit alpha-1 OS=Homo sapiens OX=9606	ATP1A1	+	Cluster -803	3.60515	0.000210145	8.38	2	2	52	2	1023	112.8	5.49		15.5729	16.771	16.7532	15.6447	15.7134	15.8021	15.813	14.9327	15.6452	15.5654	15.5717	15.6828	15.7534	15.8935	15.9043	14.5523	14.5438	14.4514	15.8607	15.8371	15.8286	15.7692	15.7688	15.5421
	1.59086	-0.646292	0.63892	High	P15104	Glutamine synthetase OS=Homo sapiens OX=9606	GLUL	+	Cluster -801	2.73284	0.000849612	6.203	5	2	33	2	373	42	6.89		16.2306	16.4543	16.8327	15.7356	15.9118	15.9313	15.7731	15.1282	15.6433	15.317	15.4694	14.8269	15.6969	15.7939	15.7731	15.193	15.115	15.127	15.6932	15.671	15.7618	15.5984	15.7035	15.4854
+	3.13745	-0.648481	0.637951	High	P61077	Ubiquitin-conjugating enzyme E2 D3 OS=Homo sapiens OX=9606	UBE2D3	+	Cluster -803	4.74942	4.90196e-05	4.988	20	2	42	2	147	16.7	7.8		16.8236	16.7962	16.6441	16.0241	16.1518	16.1426	17.1315	16.4815	17.0432	16.3915	16.151	16.0081	16.1714	16.2742	16.011	14.4945	12.6692	14.732	16.4569	16.4972	15.9807	16.1327	16.3095	16.3015
+	2.26437	-0.648717	0.637847	High	P06744	Glucose-6-phosphate isomerase OS=Homo sapiens OX=9606	GPI			NaN	NaN	9.069	8	4	27	4	558	63.1	8.32		16.5712	16.4081	16.3371	15.598	15.8753	15.897	16.4288	14.4459	15.3205	16.0532	14.7453	15.767	15.5649	15.309	15.5058	15.9911	15.9757	15.4353	16.0309	16.5587	15.51	15.9596	15.9145	14.7483
+	2.18824	-0.649355	0.637565	High	P29372	DNA-3-methyladenine glycosylase OS=Homo sapiens OX=9606	MPG	+	Cluster -803	5.29257	4.5977e-05	27.389	30	7	229	7	298	32.8	9.57		18.6444	18.4665	18.6343	17.7473	17.9202	18.1296	18.5732	17.7309	18.4383	18.1412	17.9864	17.8925	18.2702	18.4566	18.3183	17.6493	17.6629	17.6598	18.3425	18.4213	18.3501	18.5213	18.5334	17.8485
+	2.48071	-0.655048	0.635054	High	Q96MG2	Junctional sarcoplasmic reticulum protein 1 OS=Homo sapiens OX=9606	JSRP1			NaN	NaN	28.281	29	5	196	5	331	36.3	9.38		18.4606	18.3315	18.6213	17.8548	17.6939	17.8994	18.2027	16.8807	18.0441	17.8056	17.6991	17.5581	17.9496	18.2037	18.178	17.8337	17.7071	18.0604	18.2554	18.2919	18.347	18.1806	18.0743	17.5762
	1.41371	-0.656433	0.634445	High	Q9UJS0	Electrogenic aspartate/glutamate antiporter SLC25A13, mitochondrial OS=Homo sapiens OX=9606	SLC25A13	+	Cluster -803	4.06081	0.000105906	11.32	7	5	85	3	675	74.1	8.62		15.9256	15.8126	16.1876	14.9487	15.5271	15.4808	15.7878	15.4727	16.1282	15.6789	15.7803	15.3333	15.2471	15.9682	16.0606	15.0959	15.109	15.107	15.6747	15.7814	15.7411	16.7285	16.3582	16.1987
+	2.90536	-0.656454	0.634436	High	Q71UI9	Histone H2A.V OS=Homo sapiens OX=9606	H2AZ2	+	Cluster -800	7.88223	0	6.954	15	2	185	1	128	13.5	10.58		16.2724	16.1857	16.3724	15.521	15.7284	15.6117	15.6849	15.0828	15.7223	15.4627	15.3675	15.0788	15.4688	15.7147	15.4955	16.3806	16.2815	16.3322	15.5604	15.441	15.3587	16.1931	16.3489	16.1471
	1.61015	-0.657213	0.634102	High	O15075	Serine/threonine-protein kinase DCLK1 OS=Homo sapiens OX=9606	DCLK1	+	Cluster -803	7.75786	0	5.624	3	2	44	2	740	82.2	8.66		15.3909	14.8804	15.4454	14.5596	14.5074	14.6782	16.0338	15.2709	15.9496	14.7245	14.8506	14.9065	15.2764	15.5076	15.5265	14.1011	13.6454	13.9854	15.3078	15.6195	15.5994	15.6602	15.4469	15.1934
	0.878621	-0.66338	0.631397	High	P35754	Glutaredoxin-1 OS=Homo sapiens OX=9606	GLRX			NaN	NaN	6.476	28	2	44	2	106	11.8	8.09	Met-loss+Acetyl [N-Term]	16.146	15.8794	16.9941	15.5907	15.8823	15.5563	15.8111	14.8641	15.947	15.9189	15.7083	15.5228	15.0262	15.7184	15.0495	14.5745	14.4436	15.6124	15.6857	15.4929	15.4981	15.4951	15.3941	15.3677
+	3.96405	-0.663935	0.631155	High	P68032	Actin, alpha cardiac muscle 1 OS=Homo sapiens OX=9606	ACTC1	+	Cluster -803	7.97084	0	146.229	53	18	2410	5	377	42	5.39		19.2124	19.1461	19.2703	18.4965	18.5759	18.5646	20.0342	18.8842	19.799	18.1988	18.1682	18.097	18.6731	18.7572	18.7517	18.4904	18.7141	18.5582	18.9322	18.9283	18.8023	18.7342	18.6723	18.1367
+	3.80621	-0.664305	0.630993	High	P68371	Tubulin beta-4B chain OS=Homo sapiens OX=9606	TUBB4B	+	Cluster -800	5.27517	4.58453e-05	187.045	54	16	2920	2	445	49.8	4.89		20.0097	19.9012	19.8579	19.2313	19.258	19.2865	19.9313	19.04	19.8131	19.3549	18.9088	18.9941	19.2514	19.4757	19.4084	19.5766	19.6146	19.7423	19.5186	19.5395	19.597	19.5225	19.4208	19.1485
	1.52721	-0.665049	0.630667	High	O60701	UDP-glucose 6-dehydrogenase OS=Homo sapiens OX=9606	UGDH	+	Cluster -803	3.08855	0.000465574	6.367	5	2	26	2	494	55	7.12		16.5486	16.1333	16.185	15.7578	15.7948	15.3192	16.2574	15.8259	16.2592	15.8007	15.4119	15.1902	15.7673	15.9256	15.9503	15.1077	15.1747	15.2671	15.812	15.8381	15.8298	15.7744	15.7438	15.3381
+	2.08603	-0.665094	0.630647	High	Q07666	KH domain-containing, RNA-binding, signal transduction-associated protein 1 OS=Homo sapiens OX=9606	KHDRBS1	+	Cluster -803	2.54732	0.00126756	14.05	11	4	154	4	443	48.2	8.66		18.7976	18.4885	18.3642	17.7997	17.9024	17.9529	18.2697	17.9036	18.3102	17.6606	17.5259	17.7046	17.8408	18.0041	17.8637	17.6355	17.6376	17.7325	18.0079	17.9902	17.9985	18.5182	18.1301	18.1182
+	4.32817	-0.66858	0.629126	High	O75694	Nuclear pore complex protein Nup155 OS=Homo sapiens OX=9606	NUP155	+	Cluster -803	5.11262	4.38356e-05	13.274	4	4	118	4	1391	155.1	6.16		17.6561	17.5563	17.5902	16.8922	16.9498	16.9548	17.2337	16.1624	17.0238	17.2268	16.9472	16.8846	17.2008	17.1528	17.1819	16.2407	16.6092	16.6364	17.2347	17.2608	17.3607	17.2929	17.3134	17.0599
	1.34105	-0.671648	0.627789	High	P01780	Immunoglobulin heavy variable 3-7 OS=Homo sapiens OX=9606	IGHV3-7			NaN	NaN	12.082	26	3	101	2	117	12.9	6.57		15.0376	15.3867	14.8607	14.7738	14.2183	14.278	14.2849	13.5703	14.1459	14.4769	14.238	14.1613	14.9365	14.437	14.3633	14.3251	14.6143	14.5775	14.3698	14.3537	13.7622	14.4854	14.5769	13.8907
+	2.9222	-0.672202	0.627548	High	P06753	Tropomyosin alpha-3 chain OS=Homo sapiens OX=9606	TPM3	+	Cluster -803	1.81112	0.00664286	26.254	24	7	454	3	285	32.9	4.72		19.197	18.9543	19.1239	18.466	18.3419	18.4508	18.8308	18.0789	18.7572	18.3481	18.1637	18.3097	18.2649	18.508	18.4683	18.2718	18.2117	18.2179	18.5583	18.5436	18.487	18.4849	18.4886	18.1308
+	1.74516	-0.675047	0.626312	High	Q99584	Protein S100-A13 OS=Homo sapiens OX=9606	S100A13	+	Cluster -801	2.2592	0.00237203	10	21	3	112	3	98	11.5	6.16		18.5827	18.286	18.2476	17.846	17.4201	17.825	18.0802	17.0688	17.8204	17.6492	17.2302	17.4671	17.2771	17.4265	17.3435	17.6586	17.6641	17.6623	17.4353	17.4795	17.5519	17.6701	17.6108	17.3106
	0.293476	-0.675097	0.62629	High	P81534	Beta-defensin 103 OS=Homo sapiens OX=9606	DEFB103B			NaN	NaN	3.033	13	1	10	1	67	7.7	10.11		12.7706	12.878	14.3663	11.3492	12.604	14.0365	12.7021	11.9869	13.2957	12.0849	13.5397	12.3214	12.4491	12.5284	11.9509	13.047	12.9887	12.761	13.1617	13.0507	12.9538	12.1475	12.0519	11.5772
+	1.71216	-0.676185	0.625818	High	P24844	Myosin regulatory light polypeptide 9 OS=Homo sapiens OX=9606	MYL9	+	Cluster -803	2.5957	0.00115489	20.326	23	4	386	1	172	19.8	4.92		15.0563	14.8142	15.0252	14.3522	13.9825	14.5323	15.2502	14.3679	15.1099	14.4867	14.5868	14.2166	14.5294	14.7081	14.6462	14.3794	14.5163	14.5767	14.4096	14.8171	14.7946	14.7286	14.5861	14.5449
	0.738598	-0.677369	0.625305	High	Q14978	Nucleolar and coiled-body phosphoprotein 1 OS=Homo sapiens OX=9606	NOLC1			NaN	NaN	5.683	3	2	61	2	699	73.6	9.47		17.0805	15.6456	16.2321	15.5377	15.7397	15.6486	15.4661	15.3393	16.1883	15.3747	15.095	15.0333	15.658	15.4683	15.3374	15.1929	15.7071	15.2669	15.5507	15.5728	15.6655	16.1729	16.0943	16.5238
	1.02793	-0.678726	0.624717	High	O15523	ATP-dependent RNA helicase DDX3Y OS=Homo sapiens OX=9606	DDX3Y	+	Cluster -803	2.01248	0.00403714	84.698	25	15	1062	1	660	73.1	7.55		13.2097	13.7172	14.2687	13.1322	12.9576	13.0697	13.21	13.2486	14.0401	13.2234	13.4342	13.2659	12.8886	12.4644	12.6956	12.3362	12.6913	12.0428	13.3571	13.0934	13.0031	13.6783	12.996	13.6675
+	4.05313	-0.680911	0.623771	High	P07437	Tubulin beta chain OS=Homo sapiens OX=9606	TUBB	+	Cluster -803	7.34941	5.6872e-05	199.697	58	17	2964	3	444	49.6	4.89		21.2045	21.189	21.231	20.4635	20.5154	20.6028	21.2963	20.4295	21.2772	20.8236	20.4061	20.4101	20.5824	20.7551	20.7462	20.3773	20.3424	20.4186	20.7132	20.7923	20.8243	20.7874	20.8661	20.452
+	3.20106	-0.680987	0.623738	High	P60842	Eukaryotic initiation factor 4A-I OS=Homo sapiens OX=9606	EIF4A1	+	Cluster -801	8.26966	0	26.837	20	8	196	8	406	46.1	5.48		19.6354	19.7456	19.6951	19.0015	18.9079	19.1237	18.7322	17.842	18.657	18.6438	18.3228	18.2563	18.2832	18.3337	18.3366	18.4404	18.2216	18.668	18.4861	18.2165	18.3596	18.3932	18.2283	18.028
	0.761598	-0.682708	0.622995	High	Q9Y295	Developmentally-regulated GTP-binding protein 1 OS=Homo sapiens OX=9606	DRG1			NaN	NaN	8.345	10	3	42	3	367	40.5	8.9		16.757	16.7532	15.9653	15.4519	15.5334	16.4421	16.7643	15.2804	16.6777	16.3054	15.602	16.1254	16.2132	16.4192	16.5122	15.9736	15.8628	15.9065	16.374	16.4259	16.5321	16.4834	16.2194	15.2392
+	3.03936	-0.68426	0.622325	High	P23284	Peptidyl-prolyl cis-trans isomerase B OS=Homo sapiens OX=9606	PPIB	+	Cluster -803	4.2867	6.92641e-05	69.437	45	10	1188	10	216	23.7	9.41		22.4555	22.2231	22.2611	21.5764	21.6336	21.6769	21.6919	20.9096	21.6304	21.4853	21.4164	21.127	21.4705	21.5631	21.5332	21.1791	21.1114	21.2367	21.6994	21.7811	21.7351	21.67	21.6416	21.3958
+	2.92276	-0.686357	0.621421	High	P00367	Glutamate dehydrogenase 1, mitochondrial OS=Homo sapiens OX=9606	GLUD1	+	Cluster -803	5.70516	3.76176e-05	11.324	7	3	110	3	558	61.4	7.8		17.5433	17.5185	17.4376	16.8546	16.9217	16.664	17.4577	16.3041	17.3244	17.5605	17.2233	17.2649	16.8699	16.7795	16.8755	15.9579	15.8856	16.4318	16.9009	17.1933	17.1697	17.1966	17.0451	16.5544
+	1.9025	-0.688186	0.620634	High	Q9NS86	LanC-like protein 2 OS=Homo sapiens OX=9606	LANCL2	+	Cluster -803	4.44454	6.34921e-05	33.77	22	8	271	8	450	50.8	7.43		19.5841	19.0688	19.2556	18.5237	18.6139	18.7064	18.7771	18.0615	18.8316	18.8002	18.6754	18.4655	18.6382	18.7615	18.8238	18.0054	18.0107	18.0727	18.6716	18.7263	18.6837	18.7109	18.7643	18.2095
+	1.9905	-0.692547	0.61876	High	P83111	Serine beta-lactamase-like protein LACTB, mitochondrial OS=Homo sapiens OX=9606	LACTB	+	Cluster -803	3.07198	0.000469055	13.637	5	3	34	3	547	60.7	8.53		17.4851	17.2527	17.0532	16.5291	16.4484	16.736	16.9214	16.0993	16.8667	16.7154	16.3102	16.4825	16.5349	16.6694	16.5951	16.2143	16.1418	16.3429	17.0084	17.041	17.0475	16.6244	16.6431	16.0796
	1.48878	-0.69722	0.61676	High	Q15369	Elongin-C OS=Homo sapiens OX=9606	ELOC			NaN	NaN	3.551	13	1	7	1	112	12.5	4.78		15.4682	14.7749	14.9074	14.3782	14.2682	14.4124	14.6267	14.1342	14.4385	14.4415	13.7012	13.9734	14.43	14.7286	14.5719	14.4581	14.292	14.0987	14.5918	14.5728	14.7882	14.5141	14.3126	14.2316
+	2.6817	-0.697461	0.616657	High	Q9UDY4	DnaJ homolog subfamily B member 4 OS=Homo sapiens OX=9606	DNAJB4	+	Cluster -803	3.49584	0.000270463	34.799	26	9	306	8	337	37.8	8.5		18.9814	19.2853	19.2279	18.4084	18.4797	18.5141	18.9325	18.2894	19.0379	18.5906	18.4575	18.2848	18.417	18.5461	18.5334	18.546	18.4815	18.5705	18.667	18.5853	18.6204	18.7643	18.7308	18.6838
	0.938608	-0.698902	0.616041	High	Q9NZN4	EH domain-containing protein 2 OS=Homo sapiens OX=9606	EHD2	+	Cluster -803	2.26756	0.00233053	3.97	2	1	5	1	543	61.1	6.46		16.3932	16.0051	15.9283	15.8576	15.5751	14.7971	16.4184	15.871	16.2497	15.9103	15.57	15.1324	16.2457	16.2266	16.2972	15.4907	15.4915	15.637	15.9423	15.9858	16.0515	16.0522	16.2437	15.8064
	0.400049	-0.701528	0.614921	High	P05164	Myeloperoxidase OS=Homo sapiens OX=9606	MPO			NaN	NaN	11.882	6	4	19	4	745	83.8	8.97		14.3444	14.0037	12.0815	13.0119	12.3076	13.0054	13.2997	13.3214	13.1676	12.6444	12.5455	13.0015	11.5034	12.9896	11.4408	12.5263	14.1824	13.6531	12.6607	11.6969	12.1813	12.698	13.5773	13.8864
	0.449086	-0.703155	0.614228	High	Q15185	Prostaglandin E synthase 3 OS=Homo sapiens OX=9606	PTGES3			NaN	NaN	4.022	11	1	21	1	160	18.7	4.54		13.9861	16.0991	15.7826	14.8434	14.342	14.5729	15.1639	14.9798	15.6697	15.0286	14.543	14.9698	15.016	14.9647	14.981	13.9944	14.3551	14.4544	15.048	14.8684	15.0753	14.7145	14.7971	14.3579
+	1.81851	-0.703533	0.614066	High	P62847	40S ribosomal protein S24 OS=Homo sapiens OX=9606	RPS24	+	Cluster -800	6.56273	4.78088e-05	7.547	14	2	65	2	133	15.4	10.78	Acetyl [N-Term]	16.6319	16.4557	16.2797	15.5794	15.6487	16.0286	16.0096	14.9761	16.0835	15.5142	15.4539	15.2167	15.5568	15.9381	15.5861	16.5978	16.496	16.6257	16.6503	16.8656	16.8983	15.6806	15.6716	15.5408
+	2.42525	-0.704143	0.613807	High	P13010	X-ray repair cross-complementing protein 5 OS=Homo sapiens OX=9606	XRCC5	+	Cluster -803	13.0118	0	40.851	21	11	120	11	732	82.7	5.81		17.5729	17.4929	17.2697	16.597	16.7948	16.8312	17.0155	16.5948	16.7531	16.92	16.6568	16.3385	20.1167	20.4109	20.2313	17.2387	17.2021	17.2493	17.1852	17.2641	17.2995	17.2185	16.9042	16.8998
	0.29895	-0.70426	0.613757	High	Q7RTS7	Keratin, type II cytoskeletal 74 OS=Homo sapiens OX=9606	KRT74	+	Cluster -803	3.6895	0.000186916	20.655	11	6	674	1	529	57.8	7.71		14.4685	13.8646	16.2709	15.0534	12.9549	14.483	13.1951	12.5011	13.8552	15.4408	15.7432	15.7892	15.3092	15.0603	15.4363	15.9208	16.0464	16.238	15.5295	15.4239	15.5959	16.1221	16.1388	15.7963
	1.29736	-0.7054	0.613272	High	P51148	Ras-related protein Rab-5C OS=Homo sapiens OX=9606	RAB5C			NaN	NaN	8.906	17	3	49	3	216	23.5	8.41		16.9237	16.9097	17.5096	16.3557	16.7102	16.1608	15.9743	15.7326	16.593	16.1725	16.0315	15.7171	16.1312	16.2557	16.347	15.3177	16.1609	16.1399	16.3775	16.3356	16.4224	16.3559	16.3902	16.1445
+	4.13862	-0.706158	0.61295	High	Q13557	Calcium/calmodulin-dependent protein kinase type II subunit delta OS=Homo sapiens OX=9606	CAMK2D			NaN	NaN	10.537	6	3	108	3	499	56.3	7.25		18.193	18.2332	18.1195	17.4267	17.4884	17.5121	17.6673	16.4529	17.8834	17.2516	17.5877	17.2725	17.4912	18.0684	17.8247	16.9996	17.402	17.2934	17.8966	17.7199	17.8326	17.8465	17.9758	17.7353
+	3.61455	-0.708181	0.612092	High	Q9NWB6	Arginine and glutamate-rich protein 1 OS=Homo sapiens OX=9606	ARGLU1	+	Cluster -801	7.49501	4.0201e-05	2.901	3	1	61	1	273	33.2	10.35		17.728	17.8937	17.8633	17.1223	17.0744	17.1637	16.9663	16.1136	16.9239	16.6368	16.6274	16.3786	17.1095	17.0969	17.2552	16.5312	16.565	16.7198	16.9738	17.0027	16.9453	16.895	16.7825	16.5207
+	1.88234	-0.708413	0.611993	High	O43684	Mitotic checkpoint protein BUB3 OS=Homo sapiens OX=9606	BUB3			NaN	NaN	11.722	9	3	92	3	328	37.1	6.84		17.7534	17.3353	17.673	16.7021	16.8644	17.0699	17.3665	16.4135	17.309	16.4507	16.4734	16.3135	16.4788	17.2106	16.6077	16.1167	16.7923	16.2889	17.28	16.6417	17.3496	17.2012	17.2148	16.7513
+	3.1168	-0.708724	0.611861	High	Q9BQE3	Tubulin alpha-1C chain OS=Homo sapiens OX=9606	TUBA1C	+	Cluster -803	3.78218	0.000160305	138.759	46	16	1706	6	449	49.9	5.1		22.0415	21.9012	22.1363	21.266	21.3024	21.3844	21.8865	21.1318	21.9904	21.6769	21.3597	21.374	21.303	21.7028	21.4916	21.1943	21.1903	21.351	21.8441	21.6794	21.7173	21.7229	21.5277	21.331
+	2.34626	-0.710683	0.611031	High	P06733	Alpha-enolase OS=Homo sapiens OX=9606	ENO1	+	Cluster -801	3.78684	0.000160612	73.353	40	14	434	13	434	47.1	7.39		20.9361	21.0001	20.6529	20.0803	20.1011	20.2757	20.0435	18.9297	19.6584	19.4116	19.2801	19.6185	19.7518	19.6843	19.6369	19.651	19.7863	19.7866	19.6548	19.8066	19.4578	19.7276	19.5104	19.2774
+	3.3813	-0.711577	0.610652	High	P37802	Transgelin-2 OS=Homo sapiens OX=9606	TAGLN2	+	Cluster -801	2.51187	0.00135111	21.801	28	5	161	5	199	22.4	8.25		19.3399	19.3599	19.2027	18.6237	18.6412	18.5028	18.6761	17.9686	18.9653	18.2052	18.1718	18.0384	18.2691	18.3891	18.424	18.3157	18.0837	18.0217	18.3513	18.6475	18.4697	18.4001	18.3725	18.1227
+	3.12491	-0.71198	0.610482	High	Q16555	Dihydropyrimidinase-related protein 2 OS=Homo sapiens OX=9606	DPYSL2	+	Cluster -803	2.91606	0.0006016	31.986	23	9	180	9	572	62.3	6.38		19.7617	19.665	19.6147	18.8506	18.9867	19.0682	19.5077	19.0169	19.4306	19.0297	19.0954	19.0122	18.9746	19.1385	19.0114	19.2018	19.2729	19.3203	19.2921	19.3594	19.3569	19.2986	19.2664	18.9323
+	3.96856	-0.714354	0.609478	High	P19338	Nucleolin OS=Homo sapiens OX=9606	NCL	+	Cluster -800	14.4199	0	66.543	21	13	730	13	710	76.6	4.7		20.3975	20.2904	20.4493	19.6673	19.6648	19.6621	19.8996	19.1016	19.8677	19.6491	19.4585	19.4957	19.7938	19.9749	19.8706	20.3482	20.3621	20.4246	21.4034	21.3909	21.3952	19.9385	19.9166	19.6133
	1.23188	-0.714754	0.609309	High	Q9Y5M8	Signal recognition particle receptor subunit beta OS=Homo sapiens OX=9606	SRPRB			NaN	NaN	2.932	4	1	37	1	271	29.7	9.04		15.2792	15.4309	15.5871	14.2089	15.0428	14.9011	14.9655	14.538	14.6495	14.5637	14.3203	14.3573	14.318	14.8536	14.5274	14.395	14.1548	14.4396	14.882	14.7278	14.9855	15.219	14.9481	14.9009
+	1.66247	-0.714966	0.609219	High	P29144	Tripeptidyl-peptidase 2 OS=Homo sapiens OX=9606	TPP2	+	Cluster -803	1.72852	0.00818113	8	3	3	34	3	1249	138.3	6.32		15.8715	16.1229	16.4996	15.5555	15.3148	15.4789	15.5515	14.7716	15.5645	15.9737	15.3272	15.7145	15.4286	15.9799	15.7923	15.4333	16.0053	15.3799	15.9663	15.923	15.9217	16.1566	16.2027	15.8341
+	2.28303	-0.715723	0.6089	High	P14625	Endoplasmin OS=Homo sapiens OX=9606	HSP90B1	+	Cluster -803	2.52443	0.00132738	50.344	20	14	395	12	803	92.4	4.84		19.7115	19.3641	19.7354	18.7933	18.9187	18.9518	19.1643	18.1947	18.7997	18.9477	18.8632	18.8946	19.4121	19.4829	19.3382	19.442	19.1388	19.3431	19.2469	19.5113	19.6213	19.7296	19.863	18.7876
	1.52201	-0.715785	0.608874	High	Q14195	Dihydropyrimidinase-related protein 3 OS=Homo sapiens OX=9606	DPYSL3	+	Cluster -803	3.82476	0.00015534	8.379	5	3	123	3	570	61.9	6.49		17.3661	16.6884	17.3073	16.3777	16.4186	16.4183	17.1322	16.8153	17.3713	17.0091	16.974	17.0892	16.7181	16.9724	16.9323	16.6592	16.6121	16.6735	17.0962	17.1115	17.0724	17.1769	17.1111	16.8641
+	3.11965	-0.719831	0.607169	High	Q07065	Cytoskeleton-associated protein 4 OS=Homo sapiens OX=9606	CKAP4	+	Cluster -800	3.88983	0.000141732	73.368	28	14	555	14	602	66	5.92		20.5027	20.6141	20.5048	19.6861	19.9109	19.8651	20.0832	19.2161	19.8645	19.8096	19.6465	19.4018	20.0058	20.17	19.994	19.9092	19.9174	19.839	20.3359	20.3948	20.3854	20.0236	19.9549	19.6223
+	2.4034	-0.720196	0.607015	High	P10599	Thioredoxin OS=Homo sapiens OX=9606	TXN	+	Cluster -803	2.16829	0.00286897	18.301	30	3	543	3	105	11.7	4.92		21.5003	21.3845	21.306	20.5734	20.5669	20.8899	21.1043	20.3905	20.9684	20.8103	20.7209	20.4054	20.7992	20.5207	20.5153	19.3194	20.1984	20.1379	20.5198	21.1626	20.6164	20.8003	20.6073	20.3225
	1.0838	-0.720331	0.606958	High	P31949	Protein S100-A11 OS=Homo sapiens OX=9606	S100A11	+	Cluster -801	3.71903	0.000180791	12.579	28	3	112	3	105	11.7	7.12		19.6749	19.4875	18.7602	18.4198	18.4749	18.8668	17.6858	17.2601	17.9386	17.6435	18.2249	18.0665	17.4274	17.4965	18.2592	17.2035	17.2808	17.1388	17.7796	17.7528	17.6123	17.4703	17.5505	17.4747
+	4.55253	-0.720764	0.606776	High	P04075	Fructose-bisphosphate aldolase A OS=Homo sapiens OX=9606	ALDOA	+	Cluster -801	3.90868	0.000134921	69.542	55	14	359	14	364	39.4	8.09		20.7066	20.7208	20.7852	20.017	20.0571	19.9761	19.6863	19.0667	19.8194	19.6436	18.8984	19.0515	19.5631	19.6702	19.6364	19.674	19.6897	19.6901	19.5507	19.6733	19.7505	19.4915	19.5565	19.5118
+	3.23768	-0.722799	0.605921	High	Q562R1	Beta-actin-like protein 2 OS=Homo sapiens OX=9606	ACTBL2	+	Cluster -803	3.34545	0.000362393	54.75	23	6	676	1	376	42	5.59		21.9397	22.0915	22.1444	21.2753	21.3226	21.4093	21.7092	20.6924	21.589	21.4624	21.4371	21.3262	21.6143	21.7599	21.6868	21.4498	21.4526	21.4387	21.7059	21.7224	21.6064	21.7443	21.7399	21.2702
+	4.07284	-0.726662	0.604301	High	P02647	Apolipoprotein A-I OS=Homo sapiens OX=9606	APOA1	+	Cluster -803	3.57552	0.000216216	11.039	13	3	19	3	267	30.8	5.76		20.652	20.8029	20.7301	20.0084	19.9814	20.0152	20.6249	19.6423	20.4448	20.0621	19.5209	19.6486	19.9174	20.0519	19.9969	19.6587	19.664	19.7857	20.0057	20.0473	20.0747	20.0375	20.0764	19.4855
+	3.37647	-0.729966	0.602918	High	P46776	60S ribosomal protein L27a OS=Homo sapiens OX=9606	RPL27A	+	Cluster -800	13.8132	0	18.745	22	4	306	4	148	16.6	11		19.496	19.3583	19.345	18.5831	18.6797	18.7467	19.1241	18.3295	19.0055	18.7999	18.8171	18.7995	18.8598	18.9417	18.9016	19.316	19.2362	19.3335	20.6077	20.5999	20.623	18.8971	18.8852	18.5836
	0.562916	-0.731976	0.602079	High	Q9Y314	Nitric oxide synthase-interacting protein OS=Homo sapiens OX=9606	NOSIP			NaN	NaN	3.182	4	1	18	1	301	33.2	8.82		15.1881	15.3369	15.1542	15.1335	15.002	13.3479	15.2737	14.5307	15.2369	15.4619	14.6678	14.8019	15.1694	15.061	15.1213	15.1176	11.5056	14.2846	15.2653	15.415	15.0567	15.2307	15.3383	14.7343
+	2.59281	-0.732052	0.602047	High	O15067	Phosphoribosylformylglycinamidine synthase OS=Homo sapiens OX=9606	PFAS	+	Cluster -803	4.40382	7.14286e-05	5.529	2	2	35	2	1338	144.6	5.76		15.9046	15.8183	16.0607	15.128	15.0991	15.3603	15.6547	15.3499	16.1063	15.4826	15.3101	15.3362	15.7497	16.0008	15.831	14.4029	13.9005	14.1181	15.7806	14.6567	15.8482	15.8023	15.7529	15.3766
+	2.75538	-0.733441	0.601468	High	Q8IZ81	ELMO domain-containing protein 2 OS=Homo sapiens OX=9606	ELMOD2	+	Cluster -801	5.45973	3.59281e-05	2.601	7	1	22	1	293	34.9	8.05		20.4671	20.5449	20.7848	19.8649	19.9087	19.8229	19.6326	19.494	19.4862	19.4709	19.0292	19.0571	18.81	18.6495	18.9131	18.3167	18.2437	18.5668	18.2328	18.0498	18.0632	17.8754	18.0564	18.959
	0.835707	-0.734025	0.601224	High	Q13263	Transcription intermediary factor 1-beta OS=Homo sapiens OX=9606	TRIM28	+	Cluster -803	1.69769	0.00882915	3.051	1	1	6	1	835	88.5	5.77		14.1303	13.5719	14.161	13.3832	12.5322	13.7457	12.7565	11.3305	13.1905	12.3018	13.3399	13.3045	14.619	14.6179	14.3892	12.5059	13.9638	13.3633	14.0322	13.8954	14.2153	13.1869	13.7917	11.8641
	0.969251	-0.735358	0.600669	High	Q9NZI8	Insulin-like growth factor 2 mRNA-binding protein 1 OS=Homo sapiens OX=9606	IGF2BP1			NaN	NaN	5.586	5	2	5	2	577	63.4	9.2		13.0671	13.8532	13.3732	12.3535	13.2331	12.5008	13.0387	12.0308	13.7327	12.8474	11.8069	12.1832	11.8643	12.3685	14.4575	13.6767	12.4677	13.1906	13.7329	12.6434	13.4303	13.4619	12.7609	12.7633
	0.582742	-0.735722	0.600518	High	P49458	Signal recognition particle 9 kDa protein OS=Homo sapiens OX=9606	SRP9			NaN	NaN	8.079	22	2	30	2	86	10.1	7.97		16.7916	15.1921	16.9356	15.5595	15.4563	15.6964	15.6344	14.782	15.6336	15.5395	15.3494	15.5785	15.7545	15.8559	15.7846	15.8061	15.679	15.9101	16.4307	16.3856	16.4104	15.7201	15.7784	15.5561
+	2.27937	-0.740178	0.598666	High	P11021	Endoplasmic reticulum chaperone BiP OS=Homo sapiens OX=9606	HSPA5			NaN	NaN	107.397	30	17	1411	15	654	72.3	5.16		21.1768	21.5143	21.3363	20.631	20.7454	20.4305	21.2086	20.1998	20.6208	20.6938	20.5822	20.2911	21.0131	20.825	20.8506	20.7318	20.6844	21.0301	21.3025	21.0843	20.7905	21.097	20.6821	20.5331
+	2.08254	-0.742051	0.597889	High	Q15437	Protein transport protein Sec23B OS=Homo sapiens OX=9606	SEC23B			NaN	NaN	13.605	6	4	95	2	767	86.4	6.89		16.1036	15.8286	15.9527	15.188	15.4594	15.0113	15.8789	14.705	15.1474	15.4693	15.3992	15.4394	15.4491	15.6288	15.5669	14.3966	15.0262	15.0567	15.5215	15.1011	15.6994	15.5819	15.5229	15.2711
+	4.4728	-0.743065	0.597469	High	P17655	Calpain-2 catalytic subunit OS=Homo sapiens OX=9606	CAPN2	+	Cluster -801	2.94112	0.000570513	22.979	12	7	269	7	700	79.9	4.98		19.5381	19.5366	19.4933	18.8266	18.7967	18.7155	18.869	18.2347	18.9529	18.9162	18.5708	18.5836	18.6982	18.839	18.8586	18.6435	18.5113	18.6221	18.7924	18.7951	18.7988	18.7527	18.7653	18.4451
	1.01806	-0.746891	0.595886	High	O60664	Perilipin-3 OS=Homo sapiens OX=9606	PLIN3	+	Cluster -803	3.61222	0.000211293	14.353	9	3	80	3	434	47	5.44		16.5422	17.4043	17.5529	16.3486	16.6879	16.2223	17.2093	16.2613	17.0586	16.8739	16.4693	16.1273	16.5121	16.2597	16.1066	15.5061	15.4936	15.5031	15.9449	16.0121	16.1043	16.2667	16.6657	15.9033
+	2.02962	-0.747913	0.595464	High	P09496	Clathrin light chain A OS=Homo sapiens OX=9606	CLTA			NaN	NaN	4.744	7	2	89	2	248	27.1	4.51		16.9745	17.1768	17.0878	16.0555	16.3772	16.5627	16.5886	16.0103	16.8326	16.3052	16.2455	16.6853	16.5922	16.6498	16.4741	16.2871	16.3613	16.456	15.7982	16.5382	16.5054	16.9783	16.6445	16.3052
	0.418057	-0.748046	0.595409	High	Q12905	Interleukin enhancer-binding factor 2 OS=Homo sapiens OX=9606	ILF2			NaN	NaN	5.856	8	2	15	2	390	43	5.26		14.4258	13.9967	16.3953	14.0878	13.9292	14.5567	15.9702	12.0289	13.4679	15.7086	15.4584	13.3437	13.8647	15.5565	15.7044	15.9026	15.4198	13.9828	14.6929	14.5933	15.5365	15.4252	15.3624	15.6235
+	2.3716	-0.753299	0.593245	High	P13667	Protein disulfide-isomerase A4 OS=Homo sapiens OX=9606	PDIA4			NaN	NaN	45.688	23	10	531	10	645	72.9	5.07		20.5563	20.4763	20.1404	19.6051	19.6403	19.6677	19.8449	19.256	20.0918	19.5767	19.4441	19.5428	19.5581	19.7144	19.7036	19.4406	19.3167	19.2489	19.5353	19.7681	19.5666	19.6387	19.6129	19.6808
+	2.47905	-0.753483	0.59317	High	P61619	Protein transport protein Sec61 subunit alpha isoform 1 OS=Homo sapiens OX=9606	SEC61A1	+	Cluster -801	3.44238	0.000310406	3.803	2	1	21	1	476	52.2	8.06		16.0422	15.7595	15.6658	15.0336	15.1508	15.0226	14.5163	13.7148	14.5648	14.5772	14.6678	14.8584	14.9252	14.8088	14.6766	14.8385	14.6645	14.5828	14.8216	14.955	14.8534	14.8767	14.738	14.5481
+	2.92681	-0.754967	0.59256	High	Q8IZP0	Abl interactor 1 OS=Homo sapiens OX=9606	ABI1			NaN	NaN	11.94	8	3	118	3	508	55	7.06		17.5824	17.5094	17.4195	16.6276	16.7227	16.8961	17.2341	16.3585	16.9273	16.6957	16.7366	16.4108	16.5903	16.7841	16.8493	16.6062	16.5009	16.7141	16.7052	16.8509	16.8745	16.951	16.8412	16.2783
	0.454332	-0.75557	0.592312	High	Q7Z3Y7	Keratin, type I cytoskeletal 28 OS=Homo sapiens OX=9606	KRT28	+	Cluster -803	1.79961	0.00683312	30.967	11	6	2204	1	464	50.5	5.47		13.569	12.396	14.2639	13.5303	12.4883	11.9437	13.0502	12.1543	12.9798	14.4478	14.3183	11.0175	13.1778	13.9005	14.4596	12.0585	12.1477	11.7795	12.3477	13.3037	11.9808	14.5681	14.9876	15.9544
+	3.07772	-0.756996	0.591727	High	Q8WVJ2	NudC domain-containing protein 2 OS=Homo sapiens OX=9606	NUDCD2	+	Cluster -801	12.7516	0	2.851	13	1	6	1	157	17.7	5.07		18.7803	18.9702	18.9056	18.0684	18.063	18.2537	17.0284	16.273	16.9595	18.2588	18.1825	17.8455	18.2576	18.3351	18.3078	18.2267	18.2557	18.2218	18.2689	18.2685	18.3723	18.2404	18.2952	17.9344
	0.752072	-0.760138	0.59044	High	Q9UII2	ATPase inhibitor, mitochondrial OS=Homo sapiens OX=9606	ATP5IF1			NaN	NaN	2.776	9	1	5	1	106	12.2	9.35		13.3304	13.415	14.3255	12.4727	12.7281	13.5896	13.0996	11.227	11.9274	11.7071	11.4177	11.8533	11.8463	12.0026	12.3166	12.2673	12.4307	12.4243	11.8717	12.7165	12.9655	12.1508	12.2986	12.5503
+	1.93948	-0.76283	0.589339	High	Q66PJ3	ADP-ribosylation factor-like protein 6-interacting protein 4 OS=Homo sapiens OX=9606	ARL6IP4	+	Cluster -803	2.44673	0.00163397	8.083	13	2	47	2	237	26.4	10.86		16.565	17.0511	17.0478	16.0071	16.159	16.2092	16.3488	15.5619	16.141	16.3882	16.0532	15.9624	16.2815	16.3631	16.3885	15.9866	15.7342	15.8422	16.1913	16.0971	16.2099	16.4728	16.4669	15.8622
+	2.04139	-0.764957	0.588471	High	P16401	Histone H1.5 OS=Homo sapiens OX=9606	H1-5	+	Cluster -800	5.79115	3.83387e-05	12.961	11	3	184	3	226	22.6	10.92		19.6056	19.0704	19.2117	18.4926	18.5695	18.5307	18.5416	18.023	18.4122	17.7577	17.6715	17.582	17.9022	18.0184	17.9356	18.6515	18.5631	18.6805	18.7069	18.7286	18.8375	17.8964	17.9186	17.7912
+	2.67614	-0.765249	0.588352	High	P52272	Heterogeneous nuclear ribonucleoprotein M OS=Homo sapiens OX=9606	HNRNPM	+	Cluster -800	4.07277	0.000106122	33.094	16	9	293	9	730	77.5	8.7		19.6141	19.6512	19.4907	18.6531	18.8191	18.9881	19.4095	18.3029	18.8676	18.7801	18.572	18.4701	18.9147	19.0738	19.1507	19.3823	19.4396	19.5115	19.4564	19.1951	19.222	19.1039	19.0619	18.6254
	1.12245	-0.767182	0.587564	High	Q96H79	Zinc finger CCCH-type antiviral protein 1-like OS=Homo sapiens OX=9606	ZC3HAV1L	+	Cluster -801	2.62307	0.0010711	34.942	35	7	247	7	300	32.9	8.13	Met-loss+Acetyl [N-Term]	21.5555	20.5993	20.6043	20.0662	20.1618	20.2296	20.0425	19.6784	20.1527	20.1008	19.5216	19.309	19.3891	19.5278	19.4188	19.5375	19.4197	19.4693	19.7	19.6218	19.6219	19.6123	19.6443	19.4521
+	4.07122	-0.768464	0.587042	High	P09382	Galectin-1 OS=Homo sapiens OX=9606	LGALS1	+	Cluster -803	9.22574	0	45.837	36	5	1009	5	135	14.7	5.5	Met-loss+Acetyl [N-Term]	21.9259	21.9537	21.9947	21.1082	21.2062	21.2544	21.928	21.3127	22.0073	21.5796	21.5529	21.5999	20.7329	20.8888	20.8959	21.0215	20.9495	21.0429	21.5911	21.5945	21.6151	21.7015	21.6627	21.59
	1.20089	-0.769395	0.586663	High	P29692	Elongation factor 1-delta OS=Homo sapiens OX=9606	EEF1D			NaN	NaN	25.671	25	6	215	5	281	31.1	5.01	Met-loss+Acetyl [N-Term]	18.2803	17.9253	18.0476	17.1764	16.9099	17.8588	17.9735	17.0289	17.4209	16.6641	17.1811	16.2339	16.6281	16.8459	17.4155	16.8608	16.8987	16.9887	16.8844	16.9476	17.0053	16.9244	17.3902	17.0829
+	2.90829	-0.770215	0.58633	High	P46109	Crk-like protein OS=Homo sapiens OX=9606	CRKL	+	Cluster -803	8.02265	0	66.991	45	9	586	9	303	33.8	6.74		20.8606	20.7018	20.6245	19.8563	19.9432	20.0767	20.7197	20.015	20.5553	20.1228	20.0619	20.039	19.9609	20.1193	20.1186	19.4094	19.4149	19.5385	20.2614	20.3158	20.3304	20.3469	20.3787	19.9947
	0.675546	-0.770288	0.5863	High	Q7KZF4	Staphylococcal nuclease domain-containing protein 1 OS=Homo sapiens OX=9606	SND1			NaN	NaN	6.621	3	2	7	2	910	101.9	7.17		14.3389	13.5907	14.4694	12.732	13.1477	14.2084	14.0518	12.5332	14.2156	14.0936	11.6459	13.3443	14.373	14.1648	14.445	14.2136	14.088	14.1456	14.326	14.3403	14.2947	13.1928	13.1298	14.1471
	1.12859	-0.77467	0.584522	High	P25786	Proteasome subunit alpha type-1 OS=Homo sapiens OX=9606	PSMA1			NaN	NaN	2.898	5	1	20	1	263	29.5	6.61		17.0474	16.2551	16.5655	16.1408	15.4034	15.9998	15.2433	14.7652	16.2808	15.591	15.2592	15.1445	15.3586	15.3726	15.3802	15.3865	15.4086	15.2934	15.3714	15.3702	15.3053	15.3721	15.4209	14.0522
+	3.34563	-0.774708	0.584507	High	O14617	AP-3 complex subunit delta-1 OS=Homo sapiens OX=9606	AP3D1	+	Cluster -803	6.5992	4.81928e-05	13.817	2	2	81	2	1153	130.1	8.48		16.8881	17.105	16.9445	16.1374	16.2435	16.2325	16.8814	16.1743	16.7657	16.2828	16.6986	16.2148	16.8049	16.8301	16.7807	15.8102	15.6394	15.668	16.7549	16.7202	16.9027	16.9751	17.0496	16.6572
	0.561688	-0.775891	0.584028	High	P08603	Complement factor H OS=Homo sapiens OX=9606	CFH			NaN	NaN	31.194	9	9	79	9	1231	139	6.61		15.9148	17.0856	15.2787	14.7194	15.476	15.7559	15.6212	14.5118	15.7342	15.1917	14.3899	14.7377	15.7453	16.3516	16.0489	14.8211	12.9812	14.8711	15.5053	15.6116	16.0676	15.9478	15.8749	15.7509
+	4.9486	-0.776842	0.583643	High	Q09666	Neuroblast differentiation-associated protein AHNAK OS=Homo sapiens OX=9606	AHNAK	+	Cluster -803	5.46637	3.6036e-05	149.045	18	37	579	37	5890	628.7	6.15		20.9004	20.8253	20.817	20.049	20.0767	20.0864	20.3876	19.6907	20.3569	20.2015	20.1396	19.9781	20.2132	20.3246	20.2661	20.2213	20.1229	20.231	20.2987	20.3356	20.3696	20.5776	20.5421	20.3205
+	1.68267	-0.783017	0.58115	High	P55072	Transitional endoplasmic reticulum ATPase OS=Homo sapiens OX=9606	VCP	+	Cluster -801	2.87154	0.000674086	81.465	33	19	271	19	806	89.3	5.26	Met-loss+Acetyl [N-Term]	19.1735	18.5496	19.0377	18.3107	18.1124	17.9886	17.9435	16.4863	17.7525	17.2614	17.5328	17.4814	17.8016	17.7601	18.253	18.3082	18.541	18.6184	17.9817	18.0058	18.2417	17.8457	17.7902	17.4689
	0.724833	-0.783199	0.581077	High	Q14739	Delta(14)-sterol reductase LBR OS=Homo sapiens OX=9606	LBR	+	Cluster -800	6.22487	4.24028e-05	3.626	2	1	5	1	615	70.7	9.36		12.2943	13.4608	12.9626	12.83	11.8952	11.6429	12.4587	12.6635	14.2626	12.3051	13.2413	11.4932	12.8243	12.0572	11.7734	17.2514	17.2848	17.2656	12.6664	12.7743	14.0857	12.5449	12.2843	12.4841
+	3.93136	-0.785011	0.580347	High	Q99661	Kinesin-like protein KIF2C OS=Homo sapiens OX=9606	KIF2C	+	Cluster -803	3.39269	0.00034662	10.402	6	4	55	3	725	81.3	7.83		17.1614	17.2532	17.0782	16.3502	16.3932	16.3943	16.8578	15.4253	16.6988	16.548	16.1788	16.298	16.3969	16.3664	16.3477	15.6046	15.547	16.0294	16.499	16.5068	16.7343	16.7032	16.6824	16.3831
+	2.21737	-0.785454	0.580169	High	Q92598	Heat shock protein 105 kDa OS=Homo sapiens OX=9606	HSPH1	+	Cluster -800	6.33483	4.3956e-05	23.873	9	7	146	7	858	96.8	5.39		18.226	18.0521	18.2515	17.2025	17.3202	17.6506	18.0335	17.1688	17.6397	17.577	17.4678	17.4535	17.8061	17.7978	17.8259	18.4625	18.3154	18.3814	17.769	17.5002	17.8202	17.8134	17.814	17.4986
	0.618804	-0.787801	0.579226	High	O76021	Ribosomal L1 domain-containing protein 1 OS=Homo sapiens OX=9606	RSL1D1	+	Cluster -800	2.74712	0.000827372	5.002	5	2	10	2	490	54.9	10.13		13.637	14.2197	12.761	13.1303	13.1409	11.9831	13.3507	13.9426	13.5181	12.4238	12.3912	12.3498	12.1443	11.856	13.3735	13.622	12.797	11.6729	15.0604	15.3493	15.3759	13.8729	13.9853	13.4298
	1.05742	-0.789363	0.5786	High	Q16543	Hsp90 co-chaperone Cdc37 OS=Homo sapiens OX=9606	CDC37			NaN	NaN	10.141	12	4	42	4	378	44.4	5.25		17.5479	17.3185	16.4186	16.4042	16.331	16.1818	16.9211	15.6936	17.2637	16.795	16.362	18.4184	16.4933	16.9005	16.7996	16.75	16.0428	16.9457	16.7302	16.671	16.8202	16.715	16.616	16.6998
	1.5795	-0.789431	0.578572	High	P51149	Ras-related protein Rab-7a OS=Homo sapiens OX=9606	RAB7A			NaN	NaN	6.988	16	3	19	3	207	23.5	6.7		16.3864	17.1668	16.8757	15.9998	16.0783	15.9825	16.1753	12.9736	15.7663	16.2212	16.0025	15.965	15.8159	15.7684	15.86	16.0013	16.0267	16.1813	16.2577	15.9135	16.0216	16.4085	15.809	14.7307
+	3.28296	-0.789735	0.57845	High	P29508	Serpin B3 OS=Homo sapiens OX=9606	SERPINB3	+	Cluster -801	9.4159	0	139.665	53	23	601	11	390	44.5	6.81	Acetyl [N-Term]	20.2617	20.1373	20.0299	19.2901	19.4243	19.3453	17.568	17.4365	17.8024	17.4478	16.8032	16.9243	17.5371	17.68	17.6525	17.6429	17.6807	17.6315	17.1396	17.4095	17.4482	17.0734	17.1545	17.4234
+	3.12358	-0.790063	0.578319	High	P33121	Long-chain-fatty-acid--CoA ligase 1 OS=Homo sapiens OX=9606	ACSL1	+	Cluster -801	2.56742	0.0011934	28.459	13	9	275	9	698	77.9	7.15	Acetyl [N-Term]	19.9452	19.6942	19.7292	18.9529	18.9819	19.0636	19.0948	18.3618	19.3079	18.7558	18.601	18.6513	18.5498	18.8966	18.989	18.4817	18.5449	18.6755	19.0045	18.993	19.0117	18.978	19.0169	18.6002
+	1.99812	-0.790648	0.578084	High	Q8IYM9	E3 ubiquitin-protein ligase TRIM22 OS=Homo sapiens OX=9606	TRIM22	+	Cluster -803	3.81446	0.000154739	39.109	17	7	323	7	498	56.9	7.72		19.5643	19.6464	19.1648	18.4954	18.7585	18.7497	19.0413	18.6731	19.2524	19.0567	19.2754	19.3301	18.7265	18.7879	18.7994	18.6203	18.4742	18.5519	19.1681	19.0525	19.1654	19.316	19.2186	19.0141
+	3.53318	-0.791399	0.577784	High	P06576	ATP synthase subunit beta, mitochondrial OS=Homo sapiens OX=9606	ATP5F1B	+	Cluster -801	3.32236	0.00037415	27.458	14	6	206	6	529	56.5	5.4		18.6967	18.6456	18.8401	17.8924	17.9149	18.0009	17.9223	17.054	17.8187	17.7589	17.7352	17.6269	17.9033	17.9279	17.7672	18.0103	17.8437	18.1106	18.0767	17.8831	17.9057	17.9744	17.8641	17.4948
+	3.17444	-0.794205	0.576661	High	P07384	Calpain-1 catalytic subunit OS=Homo sapiens OX=9606	CAPN1	+	Cluster -801	3.08396	0.000471358	29.73	14	10	255	10	714	81.8	5.67		19.2839	19.5609	19.4767	18.6269	18.6722	18.6398	18.7102	17.8868	18.5195	18.4836	18.4863	18.375	18.3885	18.5905	18.6207	18.5532	18.2152	18.4392	18.5591	18.4998	18.5705	18.3937	18.4449	17.7452
+	1.93717	-0.79531	0.576219	High	P49748	Very long-chain specific acyl-CoA dehydrogenase, mitochondrial OS=Homo sapiens OX=9606	ACADVL	+	Cluster -803	2.23894	0.00248468	24.238	12	6	186	6	655	70.3	8.75		18.2405	18.5127	18.1447	17.5131	17.2528	17.7461	17.6837	17.0856	17.6528	17.5224	17.2158	17.3563	17.5836	17.7804	17.7272	17.2517	17.1989	17.3269	17.4978	17.8199	17.7411	17.9625	17.9326	17.6841
+	3.19775	-0.795492	0.576147	High	P21333	Filamin-A OS=Homo sapiens OX=9606	FLNA	+	Cluster -803	3.92675	0.000127745	377.507	37	65	3262	61	2647	280.6	6.06		23.3773	23.5255	23.5124	22.5446	22.7638	22.7204	23.0209	22.4049	22.9302	22.6502	22.4508	22.368	22.7178	22.8727	22.9039	22.5105	22.4537	22.5544	22.6833	22.7067	22.7385	22.8488	22.7992	22.5149
	0.536849	-0.797202	0.575464	High	Q9UJU6	Drebrin-like protein OS=Homo sapiens OX=9606	DBNL			NaN	NaN	9.994	8	3	27	3	430	48.2	5.05		16.8464	16.5706	15.1744	16.2014	14.9546	15.0437	16.5375	15.701	16.3832	15.8921	15.6295	15.7701	16.1771	16.1836	16.3214	16.1046	15.8601	15.7952	16.0264	16.2029	16.1385	15.8735	15.9435	14.689
	1.55008	-0.798331	0.575014	High	O00487	26S proteasome non-ATPase regulatory subunit 14 OS=Homo sapiens OX=9606	PSMD14			NaN	NaN	3.613	4	1	42	1	310	34.6	6.52		15.2337	15.0975	14.8438	13.8481	14.5153	14.4167	14.1357	13.534	14.0236	14.0871	14.0161	13.9658	14.1668	14.3633	14.1852	14.4436	14.4977	14.4617	14.4864	14.4664	14.3443	14.5743	14.515	14.0014
+	2.80282	-0.800024	0.574339	High	P26038	Moesin OS=Homo sapiens OX=9606	MSN			NaN	NaN	25.931	15	7	180	4	577	67.8	6.4		16.5164	16.4509	16.7465	15.6667	15.8474	15.7997	16.0668	14.8218	15.4292	15.7879	15.4849	15.9533	15.6763	15.4947	15.8685	15.8042	15.8151	15.795	16.0346	16.1366	16.1183	15.9561	15.5043	15.9938
+	3.44648	-0.806002	0.571965	High	P62937	Peptidyl-prolyl cis-trans isomerase A OS=Homo sapiens OX=9606	PPIA	+	Cluster -803	7.36926	5.74163e-05	97.357	64	10	1409	10	165	18	7.81		23.1251	23.217	23.3195	22.3253	22.463	22.4553	23.0005	22.4048	23.0282	22.4528	22.2886	22.3575	22.61	22.6994	22.7194	22.1297	22.0498	22.1812	22.5601	22.5742	22.607	22.722	22.7276	22.4052
+	3.47679	-0.809931	0.570409	High	Q01469	Fatty acid-binding protein 5 OS=Homo sapiens OX=9606	FABP5	+	Cluster -801	15.5126	0	61.669	50	6	358	6	135	15.2	7.01	Met-loss+Acetyl [N-Term]	20.9214	20.723	20.9439	20.0361	20.0531	20.0693	18.0096	17.0798	17.8832	17.9063	17.7735	17.8245	17.8699	18.0143	17.7365	18.4864	18.4683	18.5267	17.9209	17.8886	17.8246	17.476	17.1164	16.9872
+	4.02497	-0.810361	0.570239	High	P25705	ATP synthase subunit alpha, mitochondrial OS=Homo sapiens OX=9606	ATP5F1A	+	Cluster -801	6.24217	4.25532e-05	41.579	17	8	437	8	553	59.7	9.13		19.6143	19.4497	19.5547	18.724	18.7008	18.7627	18.6868	17.7568	18.5322	18.5012	18.5051	18.344	18.739	18.8433	18.8449	18.9256	18.9488	18.9658	18.8623	18.87	18.888	18.825	18.7439	18.3959
	0.804692	-0.811028	0.569975	High	Q5EB52	Mesoderm-specific transcript homolog protein OS=Homo sapiens OX=9606	MEST			NaN	NaN	7.398	9	2	50	2	335	38.8	9.74		14.5692	16.0632	15.8169	14.6159	14.6126	14.7877	14.7988	14.1032	14.6245	14.5199	14.202	13.8917	14.6743	15.6132	15.4401	15.1521	14.2317	15.3628	15.1038	15.8064	15.0646	15.7227	14.6529	14.2218
	0.987647	-0.813453	0.569018	High	B3EWG6	Protein FAM25G OS=Homo sapiens OX=9606	FAM25G			NaN	NaN	7.193	34	2	5	2	89	9.3	6.15		13.1728	14.3674	13.2624	12.7431	12.8659	12.7532	12.6201	11.2448	13.4757	12.3978	12.4274	12.9698	12.1474	12.2336	12.1276	12.4936	12.0464	12.3438	12.6769	12.4323	12.5463	12.4143	12.2441	12.0936
+	2.39692	-0.814152	0.568743	High	P27658	Collagen alpha-1(VIII) chain OS=Homo sapiens OX=9606	COL8A1	+	Cluster -801	1.69283	0.00890339	17.203	9	4	153	4	744	73.3	9.61		20.2837	20.6231	20.6802	19.6124	19.7171	19.8151	19.8503	18.8807	19.7365	19.9462	19.4768	19.612	19.7273	20.0701	19.9813	19.5928	19.6049	19.5821	19.9295	19.6281	19.7047	19.739	19.6324	19.6264
+	1.94331	-0.815074	0.568379	High	P68366	Tubulin alpha-4A chain OS=Homo sapiens OX=9606	TUBA4A	+	Cluster -803	3.02484	0.000504039	150.314	42	15	1397	5	448	49.9	5.06		20.2934	20.4755	20.6543	19.3579	19.7834	19.8367	20.3523	19.7837	20.4145	20.019	19.6985	19.8416	19.8718	20.1259	20.2	19.8175	19.6611	19.7673	20.0679	20.1058	20.2372	20.1079	20.2199	19.9119
+	4.74871	-0.818928	0.566863	High	Q92945	Far upstream element-binding protein 2 OS=Homo sapiens OX=9606	KHSRP	+	Cluster -803	5.9177	3.90879e-05	15.413	9	5	130	5	711	73.1	7.3		18.1325	18.0757	18.0897	17.2306	17.2778	17.3327	18.3649	17.6767	18.0711	17.3093	16.7234	17.0295	17.2009	17.327	17.2846	16.7315	16.9169	17.0465	17.6287	17.7511	17.5874	17.474	17.2955	17.2452
	1.52009	-0.821589	0.565818	High	Q99873	Protein arginine N-methyltransferase 1 OS=Homo sapiens OX=9606	PRMT1	+	Cluster -800	8.96363	0	20.374	13	5	130	5	371	42.4	5.35		17.4128	17.6308	17.2477	16.7302	16.1753	16.9211	16.9285	16.5317	16.8141	17.462	16.9699	17.0647	17.1136	17.083	17.0495	19.1854	19.1839	19.2616	17.1682	17.202	17.3395	17.3864	17.6468	17.5831
	1.27285	-0.821952	0.565676	High	P59998	Actin-related protein 2/3 complex subunit 4 OS=Homo sapiens OX=9606	ARPC4			NaN	NaN	7.719	17	3	121	3	168	19.7	8.43		17.5846	18.5034	17.7879	16.9126	17.1799	17.3175	17.3261	17.0428	17.5386	17.1541	16.8352	16.7284	16.949	17.1018	17.0444	17.1445	16.8986	17.1106	17.4194	17.4317	17.3468	17.4148	17.3203	17.3393
+	2.87613	-0.82228	0.565547	High	O00483	Cytochrome c oxidase subunit NDUFA4 OS=Homo sapiens OX=9606	NDUFA4			NaN	NaN	3.827	12	1	34	1	81	9.4	9.38		16.2178	15.976	16.2621	15.2432	15.4224	15.3234	15.7174	14.8326	15.6411	15.224	15.3843	15.4473	15.5042	15.6276	15.6569	15.3747	15.2164	15.1722	15.6954	15.7756	15.5956	15.542	15.6925	15.1339
+	2.81703	-0.823493	0.565072	High	P25398	40S ribosomal protein S12 OS=Homo sapiens OX=9606	RPS12	+	Cluster -800	9.5261	0	13.29	20	3	225	3	132	14.5	7.21		18.848	18.5996	18.8385	17.7999	18.0097	18.0059	18.3638	17.7534	18.341	17.9655	17.5778	17.4282	17.9445	18.051	17.9684	19.0242	19.0208	19.0135	18.7181	18.7337	18.7746	18.0253	18.0202	17.7572
+	2.69225	-0.827362	0.563559	High	Q8IYB5	Stromal membrane-associated protein 1 OS=Homo sapiens OX=9606	SMAP1	+	Cluster -803	4.41442	7.20721e-05	6.764	5	2	30	2	467	50.4	8.75		16.2757	16.2038	16.5171	15.3732	15.5886	15.5527	16.1404	15.5483	16.2181	15.7746	15.3683	15.8851	15.7285	15.7899	15.8045	15.2293	14.9225	14.9378	15.7079	15.797	15.7622	15.6879	15.6119	15.1599
+	2.76423	-0.833255	0.561261	High	P31151	Protein S100-A7 OS=Homo sapiens OX=9606	S100A7	+	Cluster -801	16.1909	0	54.106	50	8	564	4	101	11.5	6.77		20.5827	20.8312	20.9542	19.9515	19.9977	19.9192	17.9167	17.2052	17.8296	17.2904	17.0345	16.7962	17.3664	17.4893	17.4513	18.0372	17.948	17.9322	17.7088	17.8253	17.8284	17.0265	17.0899	16.8854
	1.18803	-0.83393	0.560999	High	P46783	40S ribosomal protein S10 OS=Homo sapiens OX=9606	RPS10	+	Cluster -800	5.45149	3.58209e-05	20.139	30	4	114	4	165	18.9	10.15		17.7819	17.6494	16.8004	16.8157	16.4424	16.4719	17.392	17.0329	17.4044	17.0892	17.0283	17.1399	17.0027	17.2006	17.2092	18.2538	18.614	18.4525	17.8131	17.959	18.0161	17.0382	17.0976	16.9672
	1.104	-0.83415	0.560914	High	P10809	60 kDa heat shock protein, mitochondrial OS=Homo sapiens OX=9606	HSPD1			NaN	NaN	59.436	27	11	461	11	573	61	5.87		20.1561	20.8062	20.3398	19.8292	19.9616	19.0089	19.4278	19.0587	19.7363	19.2155	19.1134	18.9645	19.3955	19.5775	19.4811	19.022	18.9812	19.0234	19.4786	19.4434	19.4953	19.4397	19.4184	19.71
	1.45346	-0.834188	0.560898	High	Q9BTE3	Mini-chromosome maintenance complex-binding protein OS=Homo sapiens OX=9606	MCMBP	+	Cluster -801	2.03471	0.003856	4.524	3	2	13	2	642	72.9	5.87		18.8219	19.0155	18.7253	17.704	17.8369	18.5192	17.3814	16.936	17.8134	17.8704	18.1751	17.3354	17.4564	15.3045	15.6798	17.9796	17.7606	17.1726	17.0544	18.2903	17.2218	17.2022	17.0073	17.3047
	0.211986	-0.835084	0.56055	High	P23246	Splicing factor, proline- and glutamine-rich OS=Homo sapiens OX=9606	SFPQ			NaN	NaN	4.089	2	1	26	1	707	76.1	9.44		13.2544	16.3212	13.1379	11.1683	14.5632	14.4767	15.052	13.7941	12.9069	14.527	14.7298	14.034	14.7413	14.6629	15.3861	15.5223	14.9191	15.3435	15.2946	15.7359	14.9986	15.3359	15.0129	11.1532
+	1.57723	-0.83584	0.560257	High	P35237	Serpin B6 OS=Homo sapiens OX=9606	SERPINB6	+	Cluster -803	3.05976	0.000481301	11.733	10	4	148	3	376	42.6	5.27		16.6293	17.25	17.383	16.2845	16.3585	16.1118	16.6847	16.2911	16.6506	16.5351	16.2245	16.4074	16.1862	16.8518	16.5985	13.4372	15.4217	15.048	16.5368	16.708	16.6785	16.5764	16.66	16.3282
+	3.52763	-0.838472	0.559235	High	P68871	Hemoglobin subunit beta OS=Homo sapiens OX=9606	HBB	+	Cluster -800	8.72561	0	13.453	24	3	34	3	147	16	7.28		19.2743	19.0409	19.0926	18.2966	18.2853	18.3104	18.4374	17.5364	18.3336	18.0373	18.1195	17.7782	18.1799	18.2213	18.0881	18.7897	18.7805	18.9477	19.1758	19.2292	19.2193	18.1226	18.094	17.8059
+	3.35559	-0.839464	0.558851	High	P30041	Peroxiredoxin-6 OS=Homo sapiens OX=9606	PRDX6			NaN	NaN	20.898	28	5	133	5	224	25	6.38		18.4121	18.5654	18.5589	17.5555	17.7604	17.7021	17.7825	17.2098	17.6702	17.7025	17.4056	17.4653	17.6015	17.8869	17.7482	17.669	17.5106	17.6389	17.5989	17.6241	17.8239	17.7317	17.735	17.5921
	0.765545	-0.840241	0.55855	High	P0C0L4	Complement C4-A OS=Homo sapiens OX=9606	C4A			NaN	NaN	25.053	5	9	61	9	1744	192.7	7.08		14.6335	14.8471	14.3915	14.0554	14.4593	12.8366	14.8366	12.5761	12.7269	14.9725	13.1181	11.9827	12.4811	12.6902	12.9399	12.2377	12.1815	12.8977	12.6311	13.945	12.1485	13.1173	15.3033	14.068
	1.44472	-0.840282	0.558534	High	Q14764	Major vault protein OS=Homo sapiens OX=9606	MVP	+	Cluster -803	2.69062	0.000949464	13.026	6	3	35	3	893	99.3	5.48		16.8666	16.851	16.7631	16.2666	15.4501	16.2432	15.6791	15.418	15.5014	16.5577	16.3803	16.3384	15.4127	16.2969	15.7483	15.3326	14.026	15.5386	16.7146	16.689	16.6892	16.3765	16.4613	15.76
+	2.56401	-0.847946	0.555575	High	P49368	T-complex protein 1 subunit gamma OS=Homo sapiens OX=9606	CCT3			NaN	NaN	30.559	19	9	277	9	545	60.5	6.49		18.4915	18.3932	18.372	17.6645	17.327	17.7213	17.8364	17.5123	17.834	17.5751	17.428	17.502	18.0182	17.8414	17.7805	17.7432	17.8246	17.9005	17.8987	17.5584	17.9419	18.0442	17.9019	17.9466
+	3.31274	-0.853685	0.553369	High	Q9Y3D2	Methionine-R-sulfoxide reductase B2, mitochondrial OS=Homo sapiens OX=9606	MSRB2	+	Cluster -803	4.03459	0.000121704	5.485	10	2	37	2	182	19.5	8.63		16.2007	16.0559	16.208	15.1723	15.3875	15.3438	16.4396	15.6271	15.8831	15.657	15.6043	15.2668	16.0839	16.2745	15.8398	15.0281	15.068	15.341	16.1361	15.9532	16.4153	16.0291	16.4586	15.706
+	1.96629	-0.857221	0.552015	High	Q86VP6	Cullin-associated NEDD8-dissociated protein 1 OS=Homo sapiens OX=9606	CAND1			NaN	NaN	6.016	2	2	27	2	1230	136.3	5.78		16.462	15.8369	16.1349	15.1833	15.2856	15.3933	15.4654	13.4119	15.1612	15.2204	14.7019	13.8963	15.3366	15.3621	15.4121	14.0207	14.7717	14.9149	15.368	15.1838	15.3607	15.2829	15.4271	15.2018
+	2.73806	-0.857953	0.551735	High	P61513	60S ribosomal protein L37a OS=Homo sapiens OX=9606	RPL37A			NaN	NaN	20.43	38	3	288	3	92	10.3	10.43		18.7471	19.0792	18.7774	18.0216	18.0883	17.92	17.8667	18.366	18.3826	17.9249	17.9311	17.9521	17.8326	18.1239	18.016	17.8067	17.8983	17.98	18.5249	18.7271	18.9022	17.9893	18.11	18.5206
+	3.663	-0.862694	0.549925	High	Q99497	Parkinson disease protein 7 OS=Homo sapiens OX=9606	PARK7	+	Cluster -803	4.28132	6.89655e-05	66.373	71	9	470	9	189	19.9	6.79		21.8202	21.6959	21.6638	20.8471	20.7907	20.9541	21.5789	20.8864	21.5747	21.1082	20.7836	20.8385	21.0438	21.2575	21.2128	21.1559	20.916	21.1596	21.265	21.0568	21.1098	21.2615	21.2127	21.0829
	1.52268	-0.863647	0.549561	High	P27635	60S ribosomal protein L10 OS=Homo sapiens OX=9606	RPL10	+	Cluster -800	7.49068	3.9801e-05	16.422	15	3	140	3	214	24.6	10.08		18.4693	18.2594	18.3138	17.6976	17.7767	16.9773	18.1534	17.2027	17.7397	17.21	16.7904	16.7632	17.3018	17.4125	17.3215	17.6982	17.558	17.6401	19.7203	19.8007	19.7518	17.1876	17.1118	17.4368
+	3.67496	-0.864795	0.549124	High	P30101	Protein disulfide-isomerase A3 OS=Homo sapiens OX=9606	PDIA3	+	Cluster -801	4.8882	5.07614e-05	38.798	22	9	742	9	505	56.7	6.35		21.2232	21.0666	21.0321	20.1807	20.2548	20.2921	20.4994	19.5236	20.3828	20.1045	19.9934	19.9766	20.2582	20.4159	20.3494	19.9528	19.907	19.9488	20.1887	20.1739	20.2521	20.2585	20.2585	19.8761
+	2.55347	-0.867903	0.547943	High	P45974	Ubiquitin carboxyl-terminal hydrolase 5 OS=Homo sapiens OX=9606	USP5	+	Cluster -803	5.55157	3.65854e-05	9.811	5	3	50	3	858	95.7	5.03		17.9323	17.6508	17.8886	16.7991	16.9289	17.1399	17.4646	16.8091	17.7146	16.9409	16.6672	16.6175	16.738	16.6903	16.7111	16.2144	16.2514	16.1843	17.0687	17.0139	16.953	16.9255	17.1101	17.1596
	1.43919	-0.868663	0.547654	High	P48163	NADP-dependent malic enzyme OS=Homo sapiens OX=9606	ME1			NaN	NaN	2.708	2	1	3	1	572	64.1	6.13		13.5807	14.0177	13.4669	12.5061	12.6975	13.2557	12.9703	11.3116	14.2959	11.4881	13.482	12.2624	11.5757	12.2532	12.6925	12.3948	12.6452	11.8789	11.1032	12.9222	12.9614	10.985	12.7941	11.8538
+	2.66432	-0.873327	0.545887	High	Q13162	Peroxiredoxin-4 OS=Homo sapiens OX=9606	PRDX4	+	Cluster -803	3.8054	0.00016185	12.762	16	4	342	3	271	30.5	6.29		17.1944	16.8204	16.8272	16.0937	16.0462	16.0821	16.6249	15.9265	16.6996	16.8418	16.6292	16.6152	16.7949	17.7221	16.827	16.7732	16.8237	16.889	16.9159	16.973	17.0758	17.1066	17.0756	16.6777
	1.35062	-0.873894	0.545672	High	Q9C0C2	182 kDa tankyrase-1-binding protein OS=Homo sapiens OX=9606	TNKS1BP1	+	Cluster -803	3.74051	0.000166038	33.429	9	10	89	10	1729	181.7	4.86		16.879	17.8823	17.4537	16.3735	16.6594	16.5604	17.7337	17.1596	17.7603	16.7584	16.741	16.8007	16.5467	17.1358	17.2562	16.3971	16.3669	15.9216	17.3645	17.4762	16.8554	17.5803	17.936	17.5225
	1.13031	-0.876026	0.544866	High	P05455	Lupus La protein OS=Homo sapiens OX=9606	SSB	+	Cluster -800	3.81773	0.000155039	11.951	9	3	36	3	408	46.8	7.12		16.0069	17.172	16.8978	15.6251	15.901	15.9225	15.5929	13.7185	15.628	15.7052	15.9137	15.4779	15.9151	16.0035	16.0188	16.7964	16.8643	16.9535	16.7457	16.8741	16.9263	16.1538	15.9667	15.6612
+	1.89283	-0.879317	0.543625	High	P37837	Transaldolase OS=Homo sapiens OX=9606	TALDO1			NaN	NaN	11.097	13	4	28	4	337	37.5	6.81		18.6086	18.151	18.2106	17.2451	17.3572	17.73	17.1425	16.0523	14.1181	17.1867	17.2255	12.2222	17.3813	16.6702	17.1987	17.9761	17.4997	17.4495	16.1748	17.0894	16.8707	17.8317	17.5739	17.026
+	3.68359	-0.87998	0.543375	High	Q14331	Protein FRG1 OS=Homo sapiens OX=9606	FRG1	+	Cluster -803	4.14439	0.000107216	23.704	18	4	386	4	258	29.2	9.01		19.9574	20.1362	20.0791	19.1518	19.1192	19.2617	19.5069	19.0923	19.612	19.3682	19.2131	19.1631	19.6438	19.7089	19.5352	19.2263	19.1646	19.0781	19.7906	19.8802	19.9521	19.676	19.6839	19.5344
+	2.08335	-0.883708	0.541973	High	P12268	Inosine-5'-monophosphate dehydrogenase 2 OS=Homo sapiens OX=9606	IMPDH2	+	Cluster -803	2.33283	0.00202568	51.216	18	9	469	8	514	55.8	6.9		20.0002	20.2337	19.6268	18.9977	19.0687	19.1432	19.7301	19.1912	19.9069	19.2542	19.1686	19.0074	19.0206	19.203	19.1356	18.9563	18.8871	18.9959	19.2712	19.2997	19.8139	19.4171	19.4054	19.303
+	3.8507	-0.884	0.541863	High	P00441	Superoxide dismutase [Cu-Zn] OS=Homo sapiens OX=9606	SOD1	+	Cluster -801	3.37655	0.000343643	4.618	8	1	34	1	154	15.9	6.13		16.5046	16.3032	16.4236	15.4878	15.5584	15.5332	16.0077	15.5654	16.1684	15.3066	14.9642	14.7826	15.8101	15.8322	15.8986	15.6891	15.6574	15.6758	15.247	15.5188	15.6787	15.085	14.7419	15.3227
+	3.66632	-0.884684	0.541606	High	Q08380	Galectin-3-binding protein OS=Homo sapiens OX=9606	LGALS3BP	+	Cluster -803	7.42345	3.8835e-05	11.948	6	3	118	3	585	65.3	5.27		18.0324	18.0701	17.9874	17.0313	17.1482	17.2562	17.6529	16.9186	17.5715	17.5721	17.4211	17.3105	17.7963	17.9867	17.8613	17.8204	17.7593	17.7466	17.8035	17.995	17.973	17.804	17.8284	17.7076
	0.913762	-0.88551	0.541296	High	A0A075B6R9	Probable non-functional immunoglobulin kappa variable 2D-24 OS=Homo sapiens OX=9606	IGKV2D-24	+	Cluster -801	3.38677	0.000345423	5.686	11	1	15	1	120	13.1	8.87		21.2777	19.9526	19.9159	19.3703	19.5747	19.5447	18.6923	18.3976	18.608	19.1354	18.0956	17.6371	18.1151	18.3096	18.1729	19.0105	18.8819	18.9089	18.4892	18.497	18.5216	18.1429	18.188	17.9112
+	2.25402	-0.885549	0.541282	High	P08134	Rho-related GTP-binding protein RhoC OS=Homo sapiens OX=9606	RHOC	+	Cluster -801	3.25866	0.000410774	4.538	13	2	17	2	193	22	6.58		16.9739	16.5521	16.5758	15.7268	15.7261	15.9922	15.5289	14.4254	15.6429	15.6152	15.0465	14.8544	15.2342	15.6244	15.3749	15.2718	15.4188	15.3803	15.6089	15.6352	15.4787	15.372	15.365	14.7875
+	2.54475	-0.887636	0.540499	High	P05120	Plasminogen activator inhibitor 2 OS=Homo sapiens OX=9606	SERPINB2	+	Cluster -803	5.53846	3.63636e-05	23.353	21	7	123	7	415	46.6	5.63		19.5558	19.9314	19.8909	18.7922	19.0207	18.9023	19.1427	18.3715	18.9506	19.4608	19.1555	19.1468	19.3387	19.5961	19.5738	19.3657	19.3727	19.4596	19.4729	19.3382	19.5713	19.5079	19.6139	19.3265
+	1.58211	-0.888414	0.540208	High	P17980	26S proteasome regulatory subunit 6A OS=Homo sapiens OX=9606	PSMC3			NaN	NaN	6.232	5	2	6	2	439	49.2	5.24		14.9917	14.8233	14.1762	13.6511	13.8884	13.7865	13.9795	13.1118	13.8059	13.4136	13.328	12.6536	12.6943	13.5227	13.7393	13.5893	14.1357	13.6891	13.0601	13.6215	13.6956	13.4315	13.3069	13.0467
+	1.56239	-0.89012	0.539569	High	Q03135	Caveolin-1 OS=Homo sapiens OX=9606	CAV1			NaN	NaN	8.73	20	2	27	2	178	20.5	6.02		15.916	16.2537	16.507	14.997	15.3248	15.6845	15.775	15.0536	15.7818	15.3646	11.9043	15.1358	15.9067	15.909	15.8656	15.6259	15.7487	15.9002	15.9226	15.7069	15.9557	16.0377	16.1098	15.6258
+	1.91576	-0.890758	0.539331	High	Q8IV08	5'-3' exonuclease PLD3 OS=Homo sapiens OX=9606	PLD3	+	Cluster -801	2.74367	0.000832298	4.923	4	2	23	2	490	54.7	6.47		17.805	17.2135	17.244	16.4587	16.4612	16.6703	15.7699	15.6505	16.0186	15.4833	13.5406	15.4792	15.298	15.6928	15.5341	13.6209	14.9096	15.1015	15.5019	15.8346	15.6063	16.0898	15.9741	15.778
+	4.47273	-0.891347	0.539111	High	Q99961	Endophilin-A2 OS=Homo sapiens OX=9606	SH3GL1	+	Cluster -803	4.72616	4.87805e-05	16.044	11	4	244	4	368	41.5	5.43		18.7098	18.6879	18.5858	17.7296	17.7802	17.7997	18.4334	17.7597	18.8816	17.8306	17.5018	17.4378	17.9155	17.9724	17.9407	17.585	17.4751	17.5437	17.9417	17.9457	18.003	17.9599	17.9837	17.9466
	0.483938	-0.894053	0.5381	High	O60925	Prefoldin subunit 1 OS=Homo sapiens OX=9606	PFDN1			NaN	NaN	3.261	9	1	20	1	122	14.2	6.81		14.8021	14.746	13.6899	14.9183	12.546	13.0915	14.8235	14.2444	14.859	14.6269	14.6525	14.5078	14.5822	14.6611	14.8039	14.5748	14.5095	14.5714	14.8652	14.976	13.0348	14.6095	15.0985	14.4307
	0.77575	-0.90837	0.532787	High	P20839	Inosine-5'-monophosphate dehydrogenase 1 OS=Homo sapiens OX=9606	IMPDH1			NaN	NaN	4.85	4	2	63	1	514	55.4	6.9		13.0623	14.333	14.234	12.2676	13.3951	13.2416	13.9483	13.3076	13.8271	13.7566	13.8351	13.6112	13.1344	13.5593	13.7445	12.9496	13.3249	13.1943	13.5254	13.8227	13.8384	13.7396	13.9388	13.3225
	0.433009	-0.910631	0.531953	High	Q99729	Heterogeneous nuclear ribonucleoprotein A/B OS=Homo sapiens OX=9606	HNRNPAB			NaN	NaN	10.361	9	3	140	2	332	36.2	8.21		14.8218	15.2019	15.6997	15.2708	15.1151	12.6057	14.4723	14.2924	14.8728	13.9636	13.4712	13.4415	13.7271	13.8651	13.9509	14.5774	14.2337	14.5453	14.2889	13.639	14.4613	14.4875	14.1981	14.5025
+	3.74122	-0.910662	0.531941	High	P11142	Heat shock cognate 71 kDa protein OS=Homo sapiens OX=9606	HSPA8	+	Cluster -800	14.4432	0	185.157	47	24	3484	19	646	70.9	5.52		22.7063	22.5954	22.679	21.6443	21.7544	21.8501	22.112	21.3998	22.0387	21.6922	21.2992	21.359	21.7754	21.9473	21.9078	23.282	23.2805	23.3259	21.9904	21.9887	21.9648	21.9865	21.9698	21.7032
	0.959258	-0.917398	0.529463	High	P51398	28S ribosomal protein S29, mitochondrial OS=Homo sapiens OX=9606	DAP3	+	Cluster -800	4.87825	5.02513e-05	4.146	4	1	9	1	398	45.5	8.88		14.3179	14.1673	13.3619	13.3623	13.3715	12.3611	13.1955	12.6495	13.2181	13.7514	13.8295	13.5549	13.43	13.9162	13.91	15.0582	15.3104	15.1802	13.9252	13.9947	14.2529	13.7322	13.9056	13.3199
+	2.05983	-0.919533	0.52868	High	Q9NZH8	Interleukin-36 gamma OS=Homo sapiens OX=9606	IL36G	+	Cluster -801	5.37662	4.70588e-05	16.103	24	3	39	3	169	18.7	5.14		15.8584	16.3462	16.164	15.0443	15.1072	15.4585	12.533	13.2899	11.7644	12.6211	13.4565	11.9455	13.972	14.0464	12.8479	14.0006	14.2918	14.4973	12.0287	12.5846	12.769	12.0912	11.8432	11.7495
	1.21355	-0.921672	0.527897	High	P20930	Filaggrin OS=Homo sapiens OX=9606	FLG	+	Cluster -801	4.25544	7.67591e-05	39.905	2	7	107	7	4061	434.9	9.25		19.9994	20.255	21.1733	19.5471	19.5273	19.5884	18.1342	16.7867	16.9899	18.8717	18.6472	18.642	17.2184	17.8609	16.7703	18.979	19.023	18.9039	18.3449	17.3695	18.527	18.446	18.3851	16.4964
	1.23854	-0.924875	0.526726	High	Q9BPX5	Actin-related protein 2/3 complex subunit 5-like protein OS=Homo sapiens OX=9606	ARPC5L			NaN	NaN	5.647	16	2	23	2	153	16.9	6.6		14.5359	14.6766	13.7067	13.3234	13.1077	13.7134	13.4155	12.9118	13.1576	14.1621	12.8977	13.1555	14.4347	14.3291	14.0631	14.9488	13.9758	12.9696	14.5023	14.5932	14.2085	14.276	14.5949	14.1118
+	2.05942	-0.926972	0.525961	High	Q99439	Calponin-2 OS=Homo sapiens OX=9606	CNN2	+	Cluster -801	8.84459	0	20.225	19	5	262	4	309	33.7	7.33		19.6211	19.3613	18.9942	18.2986	18.5241	18.3729	17.7097	17.6404	18.5432	17.5174	17.0386	17.0038	17.2079	17.3879	17.4459	15.3401	15.3124	15.4394	17.7674	17.3096	17.429	17.4754	17.5322	17.6017
	1.27746	-0.927059	0.525929	High	Q14498	RNA-binding protein 39 OS=Homo sapiens OX=9606	RBM39	+	Cluster -803	3.35664	0.000363014	17.909	8	3	82	3	530	59.3	10.1		16.5092	17.4698	17.3158	16.3484	16.3231	15.8421	16.9979	16.8649	17.6526	16.6393	16.2725	16.2139	16.6994	17.1561	16.9339	16.3493	16.0175	16.3932	16.6947	16.9163	16.9894	17.5115	17.425	17.4456
+	3.49397	-0.935567	0.522837	High	O00148	ATP-dependent RNA helicase DDX39A OS=Homo sapiens OX=9606	DDX39A			NaN	NaN	3.598	2	1	43	1	427	49.1	5.68		16.2431	16.4347	16.5029	15.4959	15.4604	15.4177	15.7724	14.702	15.9566	15.5391	14.996	15.1809	15.6007	15.6997	15.8553	15.6318	15.8873	15.9771	15.7897	15.6375	15.7947	15.6471	15.554	15.2255
+	2.88698	-0.940698	0.520981	High	P30085	UMP-CMP kinase OS=Homo sapiens OX=9606	CMPK1	+	Cluster -800	18.2408	0	5.841	9	2	15	2	196	22.2	5.57		14.5621	14.8482	14.5545	13.6253	13.6746	13.8428	13.8021	12.9044	13.7748	13.699	13.033	13.3345	13.6798	13.727	13.7635	19.1155	18.9834	19.2818	13.9201	13.8729	13.6871	13.7592	13.6777	13.4767
+	1.644	-0.944892	0.519468	High	P26368	Splicing factor U2AF 65 kDa subunit OS=Homo sapiens OX=9606	U2AF2	+	Cluster -803	1.98565	0.00429474	13.775	15	4	69	4	475	53.5	9.09		16.7247	17.4399	16.6935	16.0946	16.1142	15.8146	16.6273	15.8443	17.0821	15.8353	15.9557	15.6871	16.3369	16.4075	16.2598	16.3873	16.29	15.987	16.7125	16.4757	16.9461	16.9374	16.771	16.7163
+	3.54805	-0.947976	0.518359	High	P26641	Elongation factor 1-gamma OS=Homo sapiens OX=9606	EEF1G	+	Cluster -801	6.64208	4.87805e-05	36.321	19	7	267	7	437	50.1	6.67		19.5741	19.3627	19.5758	18.5011	18.5431	18.6244	18.6098	17.6611	18.3885	18.4967	17.9966	17.8705	18.3586	18.4637	18.5761	17.9029	17.8117	17.836	18.1429	18.2445	18.2272	18.1632	18.2039	18.0363
+	4.24489	-0.949066	0.517968	High	Q05209	Tyrosine-protein phosphatase non-receptor type 12 OS=Homo sapiens OX=9606	PTPN12	+	Cluster -803	2.86417	0.000685714	2.658	1	1	17	1	780	88.1	5.62		14.9369	14.9552	15.0671	14.0691	14.0733	13.9697	14.4396	13.6597	13.9369	14.1384	14.2684	13.6246	14.0776	14.2667	13.9062	13.2327	13.4203	13.5108	14.2664	14.3541	14.1871	14.1406	14.3614	14.1892
+	3.7728	-0.956205	0.515411	High	P07737	Profilin-1 OS=Homo sapiens OX=9606	PFN1	+	Cluster -801	6.20582	4.21053e-05	22.193	42	5	165	5	140	15	8.27		19.6503	19.4185	19.5024	18.5532	18.6042	18.5452	18.65	17.6435	18.473	18.3496	18.3452	18.1019	18.4847	18.5889	18.5245	18.9138	18.8474	18.961	18.5575	18.5498	18.5175	18.5209	18.5366	18.0971
	1.46234	-0.960602	0.513842	High	Q9NW13	RNA-binding protein 28 OS=Homo sapiens OX=9606	RBM28	+	Cluster -803	2.08105	0.00348982	4.34	3	2	13	2	759	85.7	9.22		15.9702	14.9713	15.1922	14.4692	14.3525	14.4302	14.6773	13.703	14.3022	14.4466	13.7493	13.7172	14.6667	15.6801	14.9982	14.5587	14.3482	14.4612	15.0708	14.8492	14.6784	15.2882	15.0513	15.1537
	1.4563	-0.969186	0.510794	High	P40763	Signal transducer and activator of transcription 3 OS=Homo sapiens OX=9606	STAT3	+	Cluster -803	4.58816	6.58824e-05	24.885	11	6	124	6	770	88	6.3		17.6551	18.536	18.6066	17.3059	17.2193	17.365	17.7038	16.5581	17.7829	17.5589	17.5595	17.65	17.333	17.4665	17.447	16.0826	16.3571	16.3973	17.5082	17.5934	17.5643	17.772	17.7622	17.3699
	1.24867	-0.969479	0.51069	High	P62857	40S ribosomal protein S28 OS=Homo sapiens OX=9606	RPS28	+	Cluster -800	4.29457	6.95652e-05	9.872	46	3	104	3	69	7.8	10.7		17.3575	17.0672	16.5907	15.4598	16.3286	16.3185	16.7595	16.4356	16.7487	16.3201	16.1142	15.9274	16.0635	16.1919	16.2759	17.3077	17.3828	17.4367	17.06	17.0084	16.9031	16.1687	16.3683	15.8815
+	4.11899	-0.973052	0.509427	High	P31948	Stress-induced-phosphoprotein 1 OS=Homo sapiens OX=9606	STIP1	+	Cluster -801	4.51082	6.46651e-05	7.949	6	3	18	3	543	62.6	6.8		17.0105	17.0472	16.8691	16.0259	15.9595	16.0221	15.9533	14.8745	16.0561	15.7202	15.6755	15.5269	15.8373	15.944	15.8006	15.9656	15.8726	15.9198	15.7796	15.8818	15.833	15.7381	15.8469	15.3767
+	4.4881	-0.973441	0.50929	High	Q86YZ3	Hornerin OS=Homo sapiens OX=9606	HRNR	+	Cluster -801	5.21231	4.53258e-05	39.985	9	9	35	9	2850	282.2	10.04		18.9437	19.0303	18.9249	18.0609	17.965	17.9527	16.8606	18.2185	19.2926	16.6489	16.7669	16.6414	13.472	13.6184	14.9599	15.6158	15.5066	15.6405	13.7402	13.918	14.2244	13.6774	12.8236	16.1318
+	1.72435	-0.97402	0.509086	High	Q15417	Calponin-3 OS=Homo sapiens OX=9606	CNN3	+	Cluster -801	7.74371	0	48.055	38	9	425	8	329	36.4	6.05		24.537	25.2019	25.1746	23.7362	24.0731	24.1821	23.323	22.1682	22.8137	23.3689	23.1928	23.253	22.2991	22.329	22.4011	23.3034	23.295	23.5258	22.7987	22.7989	22.5716	22.3206	22.3166	21.1781
+	3.07911	-0.977276	0.507938	High	P50452	Serpin B8 OS=Homo sapiens OX=9606	SERPINB8	+	Cluster -801	3.08334	0.000470588	12.893	10	4	143	2	374	42.7	5.57		16.4795	16.5568	16.7185	15.4439	15.7018	15.6773	15.4414	14.4525	15.7062	15.5513	15.472	15.3455	15.4464	15.0588	15.431	14.0739	13.9092	15.2001	15.3001	15.2528	15.2654	15.4408	15.3003	15.6626
+	3.64336	-0.977812	0.507749	High	Q9UQL6	Histone deacetylase 5 OS=Homo sapiens OX=9606	HDAC5	+	Cluster -803	7.98514	0	12.649	4	4	152	4	1122	121.9	6.24		18.1416	17.987	17.9873	16.9484	17.1414	17.0927	17.7469	17.0551	17.7362	17.2669	17.1732	17.0336	17.1878	17.389	17.3244	16.6364	16.6105	16.6379	17.3364	17.4456	17.4819	17.4094	17.3981	17.1986
+	4.93193	-0.9796	0.50712	High	P45880	Voltage-dependent anion-selective channel protein 2 OS=Homo sapiens OX=9606	VDAC2	+	Cluster -803	5.97388	4e-05	21.481	26	6	175	6	294	31.5	7.56		18.9093	18.8488	18.9743	17.9424	17.9278	17.9234	17.9383	17.2159	17.8968	17.8108	17.7019	17.6881	17.9842	18.1212	18.0899	17.671	17.6588	17.7489	18.0551	18.1272	18.1324	18.1244	18.1167	17.6979
+	3.51203	-0.980863	0.506677	High	Q15118	[Pyruvate dehydrogenase (acetyl-transferring)] kinase isozyme 1, mitochondrial OS=Homo sapiens OX=9606	PDK1	+	Cluster -803	7.04764	5.33333e-05	2.733	3	1	31	1	436	49.2	8.81		15.2304	15.4201	15.1911	14.2875	14.228	14.3836	14.6749	13.7702	14.4205	14.3035	14.077	14.3414	14.6064	14.7708	14.8402	14.4719	14.315	14.4409	15.1273	15.1456	15.252	15.5437	15.4502	14.8754
+	2.15773	-0.999875	0.500043	High	Q6NUK1	Calcium-binding mitochondrial carrier protein SCaMC-1 OS=Homo sapiens OX=9606	SLC25A24	+	Cluster -803	1.86241	0.00590452	6.054	5	2	15	2	477	53.3	6.33		15.8228	16.1294	16.1015	14.6872	15.1187	15.2482	15.5613	14.9808	15.5349	14.8744	14.898	14.8663	15.212	15.5443	15.4383	14.3589	14.6198	12.614	15.2446	14.8896	15.474	15.0962	15.0678	14.9509
	0.395889	-1.00923	0.496813	High	Q9H1A4	Anaphase-promoting complex subunit 1 OS=Homo sapiens OX=9606	ANAPC1			NaN	NaN	31.85	6	9	34	9	1944	216.4	6.3		15.5425	14.6237	14.2432	12.6303	15.797	12.9544	12.9262	12.5608	11.6409	16.0429	15.797	12.7779	15.8864	15.921	12.4054	12.3131	13.7934	12.6228	15.8268	13.0312	13.7883	14.2246	15.6903	13.4027
	1.43646	-1.01032	0.496435	High	Q8IUC6	TIR domain-containing adapter molecule 1 OS=Homo sapiens OX=9606	TICAM1			NaN	NaN	2.704	2	1	13	1	712	76.4	5.41		14.4889	14.5	14.9568	13.0636	13.9693	13.8819	14.0992	13.7845	14.3155	14.1774	14.1736	14.0049	14.0918	13.96	14.2986	11.186	13.7429	13.5889	13.91	14.1267	14.1149	14.1396	13.769	13.8621
+	3.84249	-1.01525	0.494743	High	O14818	Proteasome subunit alpha type-7 OS=Homo sapiens OX=9606	PSMA7	+	Cluster -801	3.905	0.000134653	7.768	12	3	60	3	248	27.9	8.46		18.9492	18.8065	18.8949	17.9809	17.8382	17.7857	18.219	17.5999	18.0822	17.6475	17.4682	17.5019	17.5787	17.8375	17.7988	17.7645	17.6978	17.8477	17.9815	17.9152	17.9543	17.6102	17.7784	17.1845
+	1.54742	-1.01765	0.493921	High	P42771	Cyclin-dependent kinase inhibitor 2A OS=Homo sapiens OX=9606	CDKN2A			NaN	NaN	10.075	15	2	25	2	156	16.5	5.81		17.4413	17.7049	18.298	16.9787	16.465	16.9476	17.4475	16.7074	17.2124	17.1164	17.0006	16.9406	16.984	17.2781	17.2153	17.0636	17.1725	17.2366	17.0406	17.0893	17.1895	17.1011	17.0235	16.718
+	2.17819	-1.01879	0.493529	High	P52907	F-actin-capping protein subunit alpha-1 OS=Homo sapiens OX=9606	CAPZA1	+	Cluster -803	3.62399	0.000205882	53.523	30	5	497	3	286	32.9	5.69		19.7867	20.4211	20.1126	18.9481	19.1263	19.1896	19.8241	19.2375	19.8639	19.4309	19.3132	19.1541	19.2542	19.4892	19.4895	19.2787	19.2628	19.468	19.6839	19.7481	19.8439	19.854	19.9867	19.6148
	0.713084	-1.01971	0.493215	High	Q12904	Aminoacyl tRNA synthase complex-interacting multifunctional protein 1 OS=Homo sapiens OX=9606	AIMP1			NaN	NaN	2.833	4	1	7	1	312	34.3	8.43		14.7297	13.7851	12.971	13.0339	12.0123	13.3805	14.5321	13.4885	13.0874	13.9898	13.6223	13.7633	14.088	14.1009	14.0199	12.2922	14.2487	14.3857	14.3499	14.4353	14.3543	14.3502	13.9644	13.8434
+	4.08261	-1.02446	0.491594	High	P63173	60S ribosomal protein L38 OS=Homo sapiens OX=9606	RPL38	+	Cluster -803	5.12502	4.45682e-05	39.522	54	6	1673	6	70	8.2	10.1		23.7424	23.7584	23.638	22.6184	22.6612	22.7858	23.1785	22.6142	23.2477	22.9424	22.4939	22.5675	22.8554	22.9757	22.9791	22.5789	22.5387	22.5304	23.181	23.2091	23.2101	22.9564	22.9916	22.7621
	1.14439	-1.02644	0.490921	High	O43240	Kallikrein-10 OS=Homo sapiens OX=9606	KLK10			NaN	NaN	2.871	4	1	6	1	276	30.2	8.59		13.9182	13.8531	13.4953	13.3593	12.843	11.985	12.7995	12.7833	12.9449	12.5863	12.8334	13.7285	13.1041	12.6414	12.504	12.4316	11.9428	12.1557	12.7131	12.6318	12.8664	12.8035	12.2385	12.7338
+	2.98288	-1.0268	0.490799	High	P52815	39S ribosomal protein L12, mitochondrial OS=Homo sapiens OX=9606	MRPL12	+	Cluster -800	9.61282	0	3.829	11	2	9	2	198	21.3	8.87		14.9817	15.0901	14.9746	14.1802	14.0018	13.784	14.3289	13.3536	13.6477	14.2324	14.3064	14.0761	14.0637	14.1457	14.4607	17.275	17.1892	17.2411	14.7372	14.952	14.249	14.2599	14.8335	14.2433
	1.44409	-1.02702	0.490723	High	P02671	Fibrinogen alpha chain OS=Homo sapiens OX=9606	FGA			NaN	NaN	23.491	6	5	33	5	866	94.9	6.01		13.3071	14.4034	13.9346	12.9875	12.8974	12.6792	11.9204	14.5581	14.7275	13.3683	12.5157	13.1531	14.04	13.7126	11.0435	13.116	13.2961	12.8111	13.7684	13.9921	14.3075	13.7713	13.912	13.004
+	4.18019	-1.02755	0.490541	High	P62266	40S ribosomal protein S23 OS=Homo sapiens OX=9606	RPS23	+	Cluster -800	9.53283	0	6.095	8	1	88	1	143	15.8	10.49		17.6586	17.7517	17.7456	16.6032	16.781	16.6891	17.4452	16.6958	17.4885	16.947	16.4566	16.5344	16.9384	16.8397	16.8925	16.841	16.7158	16.7282	17.8883	17.913	17.9577	16.9589	16.9237	16.6889
+	1.64066	-1.02862	0.490177	High	Q16531	DNA damage-binding protein 1 OS=Homo sapiens OX=9606	DDB1			NaN	NaN	9.254	3	3	55	3	1140	126.9	5.26		16.8398	16.8098	16.9696	15.3086	15.9602	16.2645	16.2982	15.4659	15.8666	15.5173	14.8722	15.8902	16.0766	15.78	15.7217	15.9869	16.5226	16.5672	16.4422	16.5557	15.8412	16.4786	15.9671	16.0657
+	2.57573	-1.03605	0.487659	High	Q96AB3	Isochorismatase domain-containing protein 2 OS=Homo sapiens OX=9606	ISOC2	+	Cluster -803	5.23397	4.5584e-05	2.958	7	1	19	1	205	22.3	7.77		15.8103	15.733	15.6377	14.4419	14.6782	14.9527	14.2223	13.6218	14.6519	14.7277	14.393	14.1272	14.6453	14.6531	14.6695	14.1216	14.0386	14.1524	15.1416	14.9347	14.8632	15.0434	14.9793	14.5481
	0.592904	-1.03962	0.486457	High	Q92747	Actin-related protein 2/3 complex subunit 1A OS=Homo sapiens OX=9606	ARPC1A			NaN	NaN	4.3	7	2	8	2	370	41.5	8.18	Met-loss+Acetyl [N-Term]	14.6684	13.2958	14.0459	14.26	11.984	12.6473	15.513	11.4041	11.6218	13.8063	14.4861	13.6321	12.8689	13.7938	13.7506	14.7418	12.9916	12.7399	15.6453	14.6656	14.6608	13.8751	13.6762	13.0643
+	3.89747	-1.04189	0.485692	High	P00558	Phosphoglycerate kinase 1 OS=Homo sapiens OX=9606	PGK1	+	Cluster -801	6.21883	4.22535e-05	49.756	26	9	263	9	417	44.6	8.1		19.5587	19.3793	19.53	18.3604	18.476	18.506	18.3715	17.2477	18.3245	18.118	17.872	17.9208	18.3944	18.4543	18.3808	18.5478	18.4756	18.5715	18.4623	18.5298	18.4629	18.4427	18.3487	17.9582
+	1.85927	-1.04274	0.485404	High	P40926	Malate dehydrogenase, mitochondrial OS=Homo sapiens OX=9606	MDH2	+	Cluster -801	3.20665	0.000414716	14.391	15	4	103	4	338	35.5	8.68		17.6121	17.2044	17.9996	16.4755	16.4573	16.7551	16.3686	15.1392	16.1977	16.2713	16.1912	16.0118	16.6588	16.3598	16.6667	17.0442	16.672	17.2207	16.6276	16.3834	16.7195	16.6158	16.6996	16.0479
+	3.39808	-1.05457	0.48144	High	O14933	Ubiquitin/ISG15-conjugating enzyme E2 L6 OS=Homo sapiens OX=9606	UBE2L6	+	Cluster -803	6.41943	4.58015e-05	32.354	46	3	143	3	153	17.8	7.88		20.0632	20.2756	20.1057	18.9664	19.1005	19.2139	20.0435	19.4378	20.2538	19.8066	19.4096	19.6958	19.3529	19.3941	19.4296	19.2099	18.7914	18.8806	19.7798	19.5781	19.6416	19.7624	19.5687	19.3265
+	1.77836	-1.05682	0.48069	High	P04792	Heat shock protein beta-1 OS=Homo sapiens OX=9606	HSPB1	+	Cluster -801	2.14366	0.00308666	55.853	57	10	243	10	205	22.8	6.4		20.0747	19.5738	19.464	18.2879	18.7239	18.9303	18.3596	17.0215	18.5996	17.4663	18.0497	17.3221	17.5989	18.1479	18.314	18.7763	18.2082	18.169	18.5111	17.9319	18.5255	18.3225	17.8497	17.6103
	0.685836	-1.05766	0.480411	High	P09525	Annexin A4 OS=Homo sapiens OX=9606	ANXA4			NaN	NaN	7.375	7	2	11	2	319	35.9	6.13		15.7967	15.9532	14.1925	13.4289	14.5557	14.7849	15.4104	13.0963	13.4196	11.7235	14.2041	14.416	14.7634	14.8159	14.769	14.7647	13.6673	14.4679	14.4123	15.2508	14.8674	14.2699	13.2887	14.8275
	0.498571	-1.06006	0.479611	High	Q96IJ6	Mannose-1-phosphate guanyltransferase alpha OS=Homo sapiens OX=9606	GMPPA			NaN	NaN	6.928	7	2	18	2	420	46.3	7.21		14.8322	14.3893	16.5198	14.9871	14.7048	12.8692	16.1625	14.5531	14.9339	13.9263	15.5825	12.9602	14.2942	16.1165	14.3474	12.8913	11.8689	13.2227	14.4261	15.635	14.151	14.6976	14.2312	14.8462
+	2.75201	-1.06388	0.478344	High	P22392	Nucleoside diphosphate kinase B OS=Homo sapiens OX=9606	NME2	+	Cluster -801	4.72831	4.88998e-05	11.849	20	3	245	1	152	17.3	8.41		16.3546	16.4876	16.6536	15.2147	15.489	15.6004	15.1865	14.8622	15.2677	15.8326	15.9161	15.9731	15.76	15.7949	15.9962	15.5445	15.4681	15.3962	15.6179	15.5951	15.5375	15.8385	15.754	15.6381
+	2.82216	-1.06444	0.478157	High	Q01105	Protein SET OS=Homo sapiens OX=9606	SET	+	Cluster -801	3.63506	0.000206642	17.936	18	4	75	4	290	33.5	4.32		18.0812	17.7051	17.7478	16.7547	16.9111	16.675	15.3273	15.7189	15.2171	16.6058	16.5135	16.4879	16.9295	16.8794	16.8856	17.0525	17.0589	17.1882	17.0135	16.677	16.3625	17.0893	16.9967	16.1349
+	4.86017	-1.0704	0.476188	High	P30740	Leukocyte elastase inhibitor OS=Homo sapiens OX=9606	SERPINB1	+	Cluster -803	6.07584	4.08163e-05	12.811	8	3	155	2	379	42.7	6.28		17.3307	17.3974	17.4497	16.3592	16.2782	16.3293	16.5868	15.9979	16.5669	16.2984	16.4871	15.9583	16.4184	16.317	16.3281	15.7466	15.5629	15.5515	16.6271	16.5544	16.6759	16.5206	16.5163	16.1576
	1.31437	-1.07061	0.476117	High	Q07021	Complement component 1 Q subcomponent-binding protein, mitochondrial OS=Homo sapiens OX=9606	C1QBP	+	Cluster -800	14.4993	0	123.969	52	9	370	9	282	31.3	4.84		18.5173	18.8079	19.0684	17.1839	18.3719	17.626	17.5479	16.5587	17.66	17.3377	17.7593	17.2165	17.8823	18.6298	17.5668	26.9875	26.8039	26.9042	20.8511	20.5667	20.5778	18.9694	18.3771	18.3459
+	4.28431	-1.07147	0.475835	High	Q86UP2	Kinectin OS=Homo sapiens OX=9606	KTN1	+	Cluster -801	11.697	0	3.706	1	1	4	1	1357	156.2	5.64		16.6003	16.6179	16.4921	15.4238	15.5734	15.4986	15.0077	14.618	15.4921	13.3262	13.1353	13.0418	12.3615	12.972	12.5596	13.8536	13.3152	13.6965	12.8093	13.0887	12.606	12.8038	13.0196	12.135
+	2.51661	-1.0737	0.475098	High	Q9H0A0	RNA cytidine acetyltransferase OS=Homo sapiens OX=9606	NAT10	+	Cluster -803	3.17769	0.000425957	6.167	2	2	60	2	1025	115.7	8.27		16.4652	16.6273	16.462	15.5519	15.6488	15.1327	16.1583	15.3045	15.9057	15.9039	15.7233	15.8882	16.0583	16.2209	16.0915	16.0946	16.0677	15.9728	16.5591	16.4821	16.467	16.4023	16.4514	15.6345
+	1.6241	-1.07547	0.474518	High	P50395	Rab GDP dissociation inhibitor beta OS=Homo sapiens OX=9606	GDI2	+	Cluster -801	3.41596	0.000336842	12.005	7	3	44	3	445	50.6	6.47		17.6078	17.1019	17.2243	15.7138	16.4648	16.5289	15.6208	15.4938	15.9185	15.9411	15.6093	15.6105	15.1464	15.3379	15.7211	15.3469	15.3268	15.2888	15.839	16.0335	15.4346	15.7974	15.8345	15.8757
	0.918192	-1.07873	0.473446	High	Q9H0P0	Cytosolic 5'-nucleotidase 3A OS=Homo sapiens OX=9606	NT5C3A			NaN	NaN	6.7	9	3	8	3	336	37.9	7.12		12.8214	14.0055	13.4888	12.7156	11.5068	12.8572	12.959	11.7544	11.7946	13.314	13.905	12.3392	13.1435	12.5206	12.0758	11.6726	12.6214	13.0268	12.4675	12.4603	13.1091	12.975	12.5581	13.7635
+	3.94358	-1.08786	0.47046	High	Q06323	Proteasome activator complex subunit 1 OS=Homo sapiens OX=9606	PSME1	+	Cluster -803	4.96271	5.20833e-05	41.445	37	9	559	9	249	28.7	6.02		20.8786	21.0004	21.0295	19.7879	19.8766	19.9804	20.1823	19.6584	20.2041	20.0332	19.7591	19.8988	19.8635	19.9384	19.9235	19.7646	19.718	19.7188	20.0186	20.06	20.1055	20.2247	20.2213	20.0689
+	5.19973	-1.08906	0.470066	High	P50479	PDZ and LIM domain protein 4 OS=Homo sapiens OX=9606	PDLIM4	+	Cluster -801	11.5434	0	16.5	18	6	186	6	330	35.4	7.91		20.6474	20.6544	20.7357	19.5788	19.5618	19.6298	20.7139	19.5151	20.5903	19.2208	18.9115	18.9155	18.9778	19.0944	18.856	18.5986	18.5797	18.5685	18.6178	18.7435	18.7512	18.9662	18.9822	18.4616
+	2.8907	-1.0915	0.469273	High	P53999	Activated RNA polymerase II transcriptional coactivator p15 OS=Homo sapiens OX=9606	SUB1	+	Cluster -803	2.46827	0.00151542	12.216	26	3	177	3	127	14.4	9.6		18.2813	18.0171	18.1182	16.9166	16.9565	17.2689	17.1948	16.6702	17.0815	16.8262	16.8951	16.8399	17.2342	17.4879	17.4261	17.3258	17.3558	17.5304	17.5528	17.4469	17.5348	17.6293	17.5537	16.9404
+	2.7049	-1.09472	0.468227	High	Q8IWX8	Calcium homeostasis endoplasmic reticulum protein OS=Homo sapiens OX=9606	CHERP	+	Cluster -803	3.10171	0.000448105	2.883	2	1	14	1	916	103.6	9.04		15.7753	15.8466	15.7093	14.3909	14.7966	14.8594	15.3589	14.9827	15.2653	14.5701	14.6527	14.6097	15.0152	15.1437	14.9451	15.4138	15.3389	15.3783	15.0808	14.9631	15.0753	15.2027	15.1555	15.2585
+	2.3586	-1.09552	0.467968	High	Q15046	Lysine--tRNA ligase OS=Homo sapiens OX=9606	KARS1	+	Cluster -803	2.74892	0.000816199	4.505	2	1	25	1	597	68	6.35		15.1957	15.5065	15.8048	14.4946	14.2719	14.4539	14.7356	14.0751	14.7439	14.9843	14.935	14.9121	14.5249	14.6421	14.8892	14.6096	14.5397	14.5633	14.9992	15.0701	14.8583	15.0643	14.8694	14.3243
+	2.43248	-1.09785	0.467213	High	P02452	Collagen alpha-1(I) chain OS=Homo sapiens OX=9606	COL1A1	+	Cluster -800	8.56717	0	6.25	2	3	9	3	1464	138.8	5.8		15.1201	15.4652	14.8454	14.0771	14.0064	14.0537	16.4561	16.3656	16.4861	14.0666	14.161	13.7733	14.6475	14.7935	14.8284	15.125	15.208	15.3105	14.6687	14.4236	14.5101	14.507	14.7699	14.3822
+	3.37989	-1.1085	0.463775	High	P35232	Prohibitin 1 OS=Homo sapiens OX=9606	PHB1	+	Cluster -801	1.92301	0.00498566	4.091	8	2	10	2	272	29.8	5.76		16.244	16.497	16.4619	15.1941	15.267	15.4162	15.4641	14.808	15.3516	15.1511	15.0623	15.3457	15.1397	15.3883	15.3277	15.0504	15.1123	15.2306	14.4068	15.3072	14.5383	14.3843	15.3608	14.9756
+	4.10079	-1.11388	0.462051	High	P02795	Metallothionein-2 OS=Homo sapiens OX=9606	MT2A	+	Cluster -801	1.86508	0.00584496	10.291	52	2	25	2	61	6	7.83	Acetyl [N-Term]	16.1216	16.1404	16.0698	14.875	15.0929	15.0223	12.9572	14.1905	11.6739	15.1532	14.8153	14.7786	15.0259	15.2625	15.0016	15.1561	15.1906	15.0387	15.2419	15.6068	15.4722	14.5004	14.5703	15.9591
+	5.90271	-1.1279	0.457582	High	P99999	Cytochrome c OS=Homo sapiens OX=9606	CYCS	+	Cluster -801	3.2924	0.000379661	15.95	31	3	44	3	105	11.7	9.57		17.2857	17.2368	17.3126	16.1648	16.1326	16.1539	16.122	14.8143	16.1004	15.5799	16.068	15.6569	16.1235	16.0792	16.1059	16.4108	16.3065	16.4477	16.0596	16.083	16.0632	15.8645	16.041	15.8938
	1.00278	-1.129	0.457232	High	Q9Y2D5	A-kinase anchor protein 2 OS=Homo sapiens OX=9606	AKAP2	+	Cluster -803	1.7907	0.00698728	12.581	5	4	37	4	859	94.6	5.11		17.8747	16.1928	16.8719	15.5444	15.779	16.229	16.5266	16.2277	16.9872	16.1077	15.7578	16.9893	17.5459	16.3243	17.7187	15.1473	15.1553	15.2602	17.1507	16.1692	15.9087	17.3637	17.2481	16.2611
+	1.4725	-1.13343	0.45583	High	Q9NUQ6	SPATS2-like protein OS=Homo sapiens OX=9606	SPATS2L	+	Cluster -800	1.6881	0.00899124	21.65	11	5	68	5	558	61.7	9.64	Met-loss+Acetyl [N-Term]	18.8006	18.1281	18.0417	17.5451	17.3518	16.6732	17.8058	16.6222	17.5863	17.4119	16.8099	15.2575	16.6397	17.5734	17.1174	17.2196	16.8973	16.7459	18.3822	18.2704	18.7962	16.9107	16.8589	16.7745
+	1.6171	-1.13563	0.455138	High	P19957	Elafin OS=Homo sapiens OX=9606	PI3			NaN	NaN	11.053	45	4	80	4	117	12.3	8.82		13.2949	13.8246	12.7624	12.3229	12.1625	11.9897	12.4169	13.6221	12.6587	11.2415	12.6802	11.4999	11.8799	12.597	12.0343	12.2522	11.9228	13.1631	12.2121	12.3455	12.4781	14.0203	12.7861	11.1074
+	1.78813	-1.13965	0.45387	High	Q14134	Tripartite motif-containing protein 29 OS=Homo sapiens OX=9606	TRIM29	+	Cluster -801	5.24475	4.57143e-05	22.428	13	7	53	7	588	65.8	7.15		18.1456	17.1712	17.5765	16.5672	16.4859	16.4212	15.8958	15.4125	16.0526	15.9876	15.4419	15.855	15.5871	15.3333	15.5005	15.4458	15.7405	15.7015	15.8196	15.4015	15.6004	15.7445	15.4825	15.3052
+	1.67767	-1.14398	0.452509	High	P31930	Cytochrome b-c1 complex subunit 1, mitochondrial OS=Homo sapiens OX=9606	UQCRC1			NaN	NaN	2.598	2	1	19	1	480	52.6	6.37		16.4342	16.9825	16.9038	16.145	15.4046	15.339	16.0977	14.9689	15.3291	15.9712	15.9775	16.0159	16.1531	16.2893	16.2808	15.9158	16.4228	15.7983	16.5524	16.4425	15.5694	16.211	16.3953	15.5193
	1.08242	-1.14717	0.451511	High	P40925	Malate dehydrogenase, cytoplasmic OS=Homo sapiens OX=9606	MDH1	+	Cluster -801	2.54234	0.00127761	8.839	10	2	32	2	334	36.4	7.36		15.9116	15.8662	15.7361	15.1969	13.7	15.1756	13.9185	12.9604	13.5543	13.7336	13.9456	13.9668	13.5831	13.789	13.5787	13.7029	13.7001	14.1933	14.1428	13.9989	13.953	14.7661	15.0727	13.4097
	0.904316	-1.16008	0.447488	High	Q9H9B4	Sideroflexin-1 OS=Homo sapiens OX=9606	SFXN1			NaN	NaN	5.471	7	2	52	1	322	35.6	9.07		14.0728	13.8281	14.0567	13.8682	11.8135	12.7956	14.4248	13.7044	12.2215	13.025	13.0415	12.821	13.0093	13.3897	13.3911	12.6678	13.5395	13.8058	13.3859	13.7051	13.298	11.7749	12.0671	13.3424
+	5.50105	-1.16051	0.447354	High	P04080	Cystatin-B OS=Homo sapiens OX=9606	CSTB	+	Cluster -801	5.4116	3.56083e-05	41.282	70	4	140	4	98	11.1	7.56	Acetyl [N-Term]	18.6369	18.6659	18.7084	17.5547	17.4992	17.4757	17.9394	16.9671	17.7824	17.4584	17.6101	17.4365	17.2242	17.4221	17.7156	17.1598	17.1301	17.2679	17.9513	17.624	17.6883	16.9512	16.9431	16.8597
+	4.62098	-1.16205	0.446878	High	P00338	L-lactate dehydrogenase A chain OS=Homo sapiens OX=9606	LDHA	+	Cluster -801	7.1223	5.38117e-05	30.927	26	9	356	8	332	36.7	8.27		20.4463	20.3374	20.3134	19.2503	19.2189	19.1417	18.9486	17.7118	18.6774	18.4648	18.4832	18.2286	18.8544	18.9091	18.9406	18.8146	18.9082	18.8602	18.9468	18.6208	18.9039	18.7325	18.7879	18.2612
+	3.28502	-1.16237	0.446779	High	Q13885	Tubulin beta-2A chain OS=Homo sapiens OX=9606	TUBB2A	+	Cluster -803	6.40405	4.54545e-05	160.841	54	16	2416	4	445	49.9	4.89		20.4153	20.5304	20.6756	19.2109	19.4311	19.4921	20.3047	19.6102	20.4042	19.8428	19.5312	19.5122	19.5404	19.7555	19.7913	19.3619	19.3043	19.3235	19.6853	19.8739	19.8709	19.8383	19.9284	19.7268
	1.19204	-1.16639	0.445534	High	P50990	T-complex protein 1 subunit theta OS=Homo sapiens OX=9606	CCT8			NaN	NaN	47.055	26	13	409	13	548	59.6	5.6		21.1129	19.7111	19.759	19.0612	18.9897	19.0328	19.1209	18.295	19.1489	18.8894	18.7251	18.8979	18.9947	19.0611	18.9938	18.8767	18.6145	19.0398	19.1459	19.1322	19.1176	19.0676	19.1087	18.8013
+	4.6478	-1.17093	0.444136	High	P83731	60S ribosomal protein L24 OS=Homo sapiens OX=9606	RPL24	+	Cluster -800	10.8479	0	28.516	25	4	390	4	157	17.8	11.25		19.8452	19.8959	19.9671	18.6598	18.7485	18.7871	19.1763	18.4604	19.0176	18.6541	18.6027	18.5012	18.8162	18.9753	18.8399	19.1456	19.112	19.1851	20.0171	20.0135	20.0216	19.1576	19.0267	18.8664
+	4.05756	-1.17274	0.443578	High	P62258	14-3-3 protein epsilon OS=Homo sapiens OX=9606	YWHAE	+	Cluster -800	13.4679	0	50.521	43	10	294	9	255	29.2	4.74	Acetyl [N-Term]	20.0328	20.0112	20.032	18.7241	18.9754	18.8583	18.7711	18.024	18.711	18.6832	17.9526	18.0958	18.5315	18.7613	18.7202	21.4121	21.3505	21.5792	18.8866	18.8255	18.5955	18.8524	18.8686	18.4988
+	3.07235	-1.17676	0.442343	High	P04259	Keratin, type II cytoskeletal 6B OS=Homo sapiens OX=9606	KRT6B	+	Cluster -801	10.6315	0	285.079	62	43	7015	2	564	60	8	Met-loss+Acetyl [N-Term]	19.9674	19.6342	19.5906	18.4451	18.6069	18.6099	17.9094	16.5481	17.5289	17.3696	16.8061	17.0204	16.8529	16.9244	16.7794	17.155	17.1444	17.1144	17.2668	17.4441	17.406	16.7836	16.7483	16.2399
+	4.44249	-1.17729	0.442183	High	P43487	Ran-specific GTPase-activating protein OS=Homo sapiens OX=9606	RANBP1			NaN	NaN	8.728	27	3	21	3	201	23.3	5.29		16.4965	16.5096	16.6662	15.3602	15.4228	15.3575	15.6067	15.2175	16.3896	15.4821	15.4752	15.6626	15.7297	14.762	14.6575	15.4328	15.6723	15.7653	14.3709	15.8922	14.8127	16.0407	14.7275	15.7352
+	5.26517	-1.18103	0.441037	High	Q6ZVX7	F-box only protein 50 OS=Homo sapiens OX=9606	NCCRP1	+	Cluster -801	9.89727	0	26.478	26	6	107	6	275	30.8	6.62		19.5853	19.6052	19.5306	18.4309	18.411	18.3361	17.5512	17.0975	17.4936	17.585	16.9759	17.0597	17.2362	17.0505	17.1081	17.3175	17.3502	17.4081	17.5318	17.2818	17.2903	17.3331	17.1309	16.6381
+	2.31294	-1.18557	0.43965	High	MB0005	Proteine N2C GLY - GFP (echantillon 5)	N2C	+	Cluster -803	9.8975	0	310.145	48	25	11011	1	383	37.5	6.38		15.7775	16.0367	16.4208	14.7041	15.02	14.9543	14.3428	11.9459	12.9142	14.2262	11.7664	11.8754	20.61	20.7189	20.8696	13.3026	13.4056	13.0763	13.0975	12.8034	13.2199	13.2191	12.6443	12.9497
+	3.85224	-1.19368	0.437187	High	P63244	Receptor of activated protein C kinase 1 OS=Homo sapiens OX=9606	RACK1	+	Cluster -801	8.14005	0	22.114	29	7	73	7	317	35.1	7.69		18.3155	18.0742	18.12	17.0545	16.9343	16.94	16.0607	15.5674	15.8901	15.6606	15.1496	15.3763	16.2732	16.3856	16.1983	16.1051	16.4996	15.998	16.3465	16.2941	16.336	16.1281	15.8409	15.6606
+	3.99449	-1.19725	0.436107	High	P07858	Cathepsin B OS=Homo sapiens OX=9606	CTSB	+	Cluster -801	6.10048	4.10959e-05	4.293	3	1	29	1	339	37.8	6.3		16.7539	16.5265	16.5408	15.3663	15.4479	15.4153	15.2248	14.1427	15.0944	14.9823	14.5368	15.1029	15.2897	15.2595	15.357	14.9185	14.7935	14.7006	14.9493	15.0566	15.1357	14.8702	14.8705	14.5369
+	2.22717	-1.19807	0.435857	High	Q96I25	Splicing factor 45 OS=Homo sapiens OX=9606	RBM17	+	Cluster -803	2.33155	0.00202849	2.804	3	1	18	1	401	44.9	5.97		14.7812	15.1474	15.5005	13.8231	14.1085	13.9032	14.9282	14.7575	15.3853	12.3662	14.3202	12.9435	14.7272	14.9034	14.8485	14.6208	14.1414	14.6757	14.697	15.2175	14.8973	15.0864	14.9721	14.9429
+	5.32411	-1.2069	0.433198	High	O75940	Survival of motor neuron-related-splicing factor 30 OS=Homo sapiens OX=9606	SMNDC1	+	Cluster -803	2.31467	0.00209957	2.759	5	1	27	1	238	26.7	7.24		15.3733	15.2929	15.2758	14.139	14.1119	14.0705	14.7677	13.8811	14.6427	14.4422	14.373	14.3352	14.3496	14.5498	14.4371	14.4053	14.4074	14.2482	14.7697	14.825	14.6445	14.8763	14.2994	14.2047
+	2.0517	-1.20692	0.433192	High	P61204	ADP-ribosylation factor 3 OS=Homo sapiens OX=9606	ARF3			NaN	NaN	14.588	20	3	87	1	181	20.6	7.43		15.6769	15.03	15.0114	14.2811	13.8573	13.9592	13.2444	11.5251	12.0697	11.7494	12.918	12.6911	13.8711	13.7611	13.4959	14.2896	14.5273	11.6671	13.7867	14.0849	13.7272	13.8868	13.6798	13.2996
+	3.53148	-1.21376	0.431142	High	P12814	Alpha-actinin-1 OS=Homo sapiens OX=9606	ACTN1	+	Cluster -800	3.59259	0.000216998	38.014	11	8	227	1	892	103	5.41		15.3234	15.0915	15.3007	14.0009	13.9146	14.1588	14.3859	13.801	14.1948	14.0259	14.3149	13.6576	14.4691	14.8432	14.6152	14.5216	14.4892	14.8282	15.0312	15.0406	15.0603	14.5215	14.3892	13.8687
+	5.39417	-1.21794	0.429897	High	Q8WVV4	Protein POF1B OS=Homo sapiens OX=9606	POF1B	+	Cluster -801	12.7168	0	56.052	23	12	184	12	589	68	6.32		19.9268	19.9402	19.9066	18.6408	18.7282	18.7508	17.1466	16.8199	17.3949	16.5832	15.7782	15.7588	15.0715	15.4691	15.2857	15.4783	16.2239	15.7324	15.2868	15.8096	15.6808	14.1769	14.0116	14.0594
+	3.1089	-1.2235	0.428243	High	Q9P227	Rho GTPase-activating protein 23 OS=Homo sapiens OX=9606	ARHGAP23	+	Cluster -803	4.16529	9.93789e-05	3.24	1	1	51	1	1491	162.1	9.19		21.0584	21.0638	21.0288	19.6474	19.7473	20.0858	20.937	20.0739	21.2209	20.4196	19.6262	19.6018	19.9262	20.1455	20.0622	20.3051	20.1634	20.0673	20.3356	20.3945	20.3572	20.5851	20.6068	20.2138
+	3.38044	-1.22631	0.427409	High	P28066	Proteasome subunit alpha type-5 OS=Homo sapiens OX=9606	PSMA5	+	Cluster -801	2.05536	0.00370968	6.924	12	2	16	2	241	26.4	4.79		17.0263	17.0539	16.9657	16.0022	15.632	15.7329	15.6553	13.2161	15.1953	15.3424	15.1275	15.0103	15.2577	15.3267	15.3979	15.49	15.4621	15.4023	15.2352	15.3864	15.4875	15.3181	15.3584	13.4774
+	1.50675	-1.22782	0.426961	High	Q9UQ80	Proliferation-associated protein 2G4 OS=Homo sapiens OX=9606	PA2G4	+	Cluster -801	1.74679	0.00785298	7.387	6	2	20	2	394	43.8	6.55		15.1945	16.4621	15.8238	14.5407	14.7758	14.4804	14.3958	13.2727	14.5719	14.4561	14.2617	14.5184	14.6098	14.4499	14.6368	14.3866	14.6099	14.8294	14.4813	14.3252	14.5934	14.9227	14.8717	14.3996
+	3.48476	-1.22987	0.426356	High	P67936	Tropomyosin alpha-4 chain OS=Homo sapiens OX=9606	TPM4	+	Cluster -801	5.1624	4.48179e-05	30.565	37	9	427	6	248	28.5	4.69	Met-loss+Acetyl [N-Term]	19.3228	19.4575	19.4731	18.0101	18.2149	18.3388	18.7026	17.9146	18.6845	18.3063	18.0716	17.8078	18.4007	18.3708	18.4988	18.3892	18.2269	18.4061	18.5953	18.4315	18.5683	18.5707	18.4296	18.1421
+	3.68359	-1.23344	0.425301	High	P25788	Proteasome subunit alpha type-3 OS=Homo sapiens OX=9606	PSMA3	+	Cluster -801	5.08856	4.34783e-05	7.413	9	2	32	2	255	28.4	5.33		17.5512	17.2509	17.4698	16.2562	16.156	16.1594	15.7451	14.5982	15.6566	15.8365	15.4867	15.7198	15.6426	15.731	15.6853	14.8656	15.7193	15.6877	15.7875	15.7641	15.7989	15.6503	15.4319	15.1084
+	1.8452	-1.2337	0.425224	High	P08708	40S ribosomal protein S17 OS=Homo sapiens OX=9606	RPS17	+	Cluster -801	3.41804	0.000337434	20.658	41	4	122	4	135	15.5	9.85		17.6912	17.7108	18.553	16.6454	16.6822	16.9263	16.7023	15.6795	16.3901	16.4416	16.5302	16.4295	16.5623	16.9014	16.6628	17.3009	17.1674	17.4002	17.343	17.8152	17.9665	17.0725	17.13	16.2658
+	3.39215	-1.24193	0.422806	High	O75342	Arachidonate 12-lipoxygenase, 12R-type OS=Homo sapiens OX=9606	ALOX12B	+	Cluster -801	6.98712	5.21739e-05	15.901	9	5	31	5	701	80.3	7.64		19.0542	18.7058	18.9863	17.6171	17.6508	17.7526	17.5091	16.7195	17.3648	17.3497	17.0299	17.0833	17.1898	17.4707	17.4294	17.1525	16.9391	17.2241	17.4994	17.2571	17.4588	17.3736	17.4638	16.8506
+	1.52922	-1.24475	0.42198	High	O43776	Asparagine--tRNA ligase, cytoplasmic OS=Homo sapiens OX=9606	NARS1	+	Cluster -801	1.7409	0.00795455	4.963	2	1	12	1	548	62.9	6.25		14.259	15.4041	15.2554	13.5831	13.6595	13.9417	13.9637	11.4542	12.2812	13.5523	13.4778	12.6583	13.7481	13.8927	13.9678	13.6745	13.8318	14.4438	14.2176	13.9229	13.9769	13.7015	14.1904	13.7402
+	3.68667	-1.24711	0.42129	High	E9PAV3	Nascent polypeptide-associated complex subunit alpha, muscle-specific form OS=Homo sapiens OX=9606	NACA	+	Cluster -803	2.39923	0.00175652	23.488	2	3	131	3	2078	205.3	9.58		18.3486	18.4989	18.2036	17.0315	17.0923	17.1861	17.8378	16.2184	17.6922	17.7856	17.7178	17.6672	17.6399	17.7355	17.9174	17.6935	17.6893	17.7892	17.6767	17.7362	17.7884	17.4836	17.5241	16.4072
+	1.97183	-1.2485	0.420885	High	P55884	Eukaryotic translation initiation factor 3 subunit B OS=Homo sapiens OX=9606	EIF3B	+	Cluster -801	2.51901	0.00133531	6.161	3	2	7	2	814	92.4	5		14.754	14.6809	15.145	13.142	13.8079	13.8844	13.4406	12.6772	13.1152	13.5551	13.7126	13.4599	13.583	13.6872	13.7286	13.5932	13.7412	14.0368	13.734	13.9424	14.0556	14.004	13.5681	13.7023
	1.28524	-1.24891	0.420766	High	Q96AE4	Far upstream element-binding protein 1 OS=Homo sapiens OX=9606	FUBP1			NaN	NaN	4.217	4	2	9	2	644	67.5	7.61		15.3634	13.831	14.902	13.3944	13.5274	13.4278	13.2697	11.0182	13.2161	13.1062	13.428	14.4822	14.438	14.4273	14.2559	14.4043	13.302	14.4996	14.5523	14.1245	14.4977	13.4209	14.4296	13.8711
	0.555983	-1.2548	0.419053	High	P62820	Ras-related protein Rab-1A OS=Homo sapiens OX=9606	RAB1A			NaN	NaN	10.421	15	3	205	1	205	22.7	6.21		13.1988	15.6161	12.3737	12.6138	12.0208	12.7896	12.6948	13.6375	12.891	11.5175	13.9608	12.3202	13.4962	13.0166	11.4653	13.1956	12.9973	12.3009	14.1696	13.337	13.0707	13.2131	12.6688	12.4317
+	2.4592	-1.26028	0.417463	High	P01024	Complement C3 OS=Homo sapiens OX=9606	C3	+	Cluster -801	4.62712	6.63507e-05	121.969	21	27	317	27	1663	187	6.4		20.9289	20.8835	20.8745	19.2862	19.6302	19.9897	18.6652	17.929	18.4796	18.9751	18.8906	19.0913	18.2709	18.3613	18.4176	19.1405	18.8829	19.2308	18.9592	18.6124	18.4879	18.3666	18.7772	16.634
+	4.38531	-1.26415	0.416346	High	Q6IS14	Eukaryotic translation initiation factor 5A-1-like OS=Homo sapiens OX=9606	EIF5AL1	+	Cluster -801	4.00408	0.000121457	7.361	8	1	88	1	154	16.8	5		17.3914	17.5535	17.5258	16.1934	16.1765	16.3084	16.1711	15.5784	15.8442	16.2285	15.839	15.9656	16.3841	16.3909	16.503	16.3979	16.2021	16.3037	16.3525	16.4688	16.4289	16.1648	16.1585	16.2552
	0.614124	-1.26445	0.416257	High	P02675	Fibrinogen beta chain OS=Homo sapiens OX=9606	FGB			NaN	NaN	94.986	42	15	229	15	491	55.9	8.27		13.5705	13.0169	14.9939	11.196	13.0654	13.5266	13.8724	12.539	12.5091	12.6101	13.3526	14.2899	12.6844	14.9738	12.7404	12.7971	12.7969	12.4773	13.4698	12.8574	12.689	12.7916	14.0649	12.4464
+	4.20173	-1.26517	0.416051	High	O75477	Erlin-1 OS=Homo sapiens OX=9606	ERLIN1	+	Cluster -803	4.64345	5.74163e-05	5.189	3	1	41	1	348	39.1	7.87		16.1476	16.0166	15.9838	14.8015	14.8647	14.6862	15.2903	14.577	15.1174	14.9666	14.9658	14.5053	15.1882	15.2808	15.2537	14.8799	14.8576	14.968	15.4063	15.3095	15.3618	15.5629	15.4374	15.2377
	0.682893	-1.26577	0.415878	High	P07476	Involucrin OS=Homo sapiens OX=9606	IVL	+	Cluster -801	4.23577	7.62712e-05	102.344	43	19	129	19	585	68.4	4.61		18.2225	17.3237	15.3944	15.9473	15.5505	15.6455	13.7546	11.9812	15.0378	13.1894	11.4553	12.4687	13.5522	13.2405	12.2588	16.7309	16.5062	17.3126	11.8382	12.9596	12.4057	13.174	12.4643	15.0074
+	3.56967	-1.26643	0.415686	High	P35659	Protein DEK OS=Homo sapiens OX=9606	DEK	+	Cluster -803	3.68536	0.000186567	8.961	9	3	81	3	375	42.6	8.56		17.8559	17.5678	17.6194	16.3705	16.3476	16.5257	16.7202	16.4094	16.8251	16.615	16.191	16.2649	16.799	16.9299	16.8409	16.4232	16.2126	16.3646	16.8113	16.7999	16.7857	16.8654	16.9549	16.7806
+	1.41279	-1.268	0.415235	High	P51571	Translocon-associated protein subunit delta OS=Homo sapiens OX=9606	SSR4			NaN	NaN	4.348	6	1	42	1	173	19	6.15		16.8461	15.9496	16.0596	14.5298	15.5879	14.9336	14.8222	13.5471	14.5742	14.1843	14.257	14.3246	15.0621	14.8101	14.6319	15.4004	14.4655	14.8182	15.6097	14.6053	14.7521	14.7133	14.778	14.5816
+	4.97233	-1.27113	0.414336	High	Q9NQC3	Reticulon-4 OS=Homo sapiens OX=9606	RTN4	+	Cluster -801	8.61043	0	11.128	2	2	115	2	1192	129.9	4.5		19.7816	19.6346	19.7066	18.4022	18.4391	18.4681	18.1659	17.5011	17.9797	17.99	17.9988	17.7918	17.9305	18.1272	18.053	18.1685	18.2903	18.3513	18.0775	18.1038	18.1746	17.5648	17.5666	17.5636
+	2.18121	-1.2714	0.414258	High	P54819	Adenylate kinase 2, mitochondrial OS=Homo sapiens OX=9606	AK2			NaN	NaN	3.359	4	1	36	1	239	26.5	7.81		16.019	15.958	15.4745	14.8472	14.2424	14.5478	15.3566	14.7656	14.9266	14.928	14.2158	14.4463	14.6332	14.9216	14.6835	14.6662	14.5389	14.5614	14.8819	14.9484	15.0709	14.9241	14.9485	14.6573
+	1.47963	-1.27337	0.413691	High	Q5T9A4	ATPase family AAA domain-containing protein 3B OS=Homo sapiens OX=9606	ATAD3B			NaN	NaN	22.682	10	7	284	1	648	72.5	9.2		15.7794	17.0987	16.0956	15.0721	14.9907	15.0907	15.2499	14.1506	15.1719	15.6035	13.0761	14.683	15.7067	15.3632	15.2685	15.2389	11.188	15.7018	15.7745	15.6723	15.3358	15.7493	13.3367	15.0776
+	2.52608	-1.27604	0.412928	High	P22528	Cornifin-B OS=Homo sapiens OX=9606	SPRR1B	+	Cluster -801	3.15377	0.000431894	35.332	88	6	77	3	89	9.9	8.48		16.0983	15.5884	15.5014	14.5831	14.3584	14.4185	13.078	11.466	12.3969	14.3666	14.0006	14.8201	14.957	15.0249	15.1385	14.7151	14.7357	14.6848	11.4273	13.9092	14.4227	11.9936	13.6924	12.8843
	1.21752	-1.28648	0.40995	High	Q9UJX3	Anaphase-promoting complex subunit 7 OS=Homo sapiens OX=9606	ANAPC7			NaN	NaN	33.593	24	10	49	10	565	63.1	5.72		14.9695	15.1268	16.315	14.5035	13.6754	14.373	14.6422	13.1627	14.0218	14.7756	13.8392	13.8743	15.2141	14.0449	14.7673	14.108	13.9892	13.4791	14.4418	13.9403	14.3511	13.9485	14.4071	13.9719
+	3.25516	-1.29297	0.40811	High	P30086	Phosphatidylethanolamine-binding protein 1 OS=Homo sapiens OX=9606	PEBP1	+	Cluster -801	2.39617	0.00177713	2.846	5	1	13	1	187	21	7.53		14.9533	14.6317	14.5432	13.4817	13.374	13.3936	12.4056	12.1863	12.584	13.9171	12.8424	12.4314	12.464	12.5293	11.7485	12.1205	12.356	12.9878	12.9218	12.0809	13.2721	12.5726	13.746	13.6118
+	1.71477	-1.30561	0.404549	High	O95793	Double-stranded RNA-binding protein Staufen homolog 1 OS=Homo sapiens OX=9606	STAU1	+	Cluster -800	4.14707	0.000107438	9.172	6	3	35	3	577	63.1	9.44		16.1997	16.4716	15.6007	14.9915	15.0364	14.3274	15.4978	13.7673	15.3969	14.8471	14.6776	15.3286	15.161	15.5773	14.3238	16.4806	16.3062	16.2664	17.1493	17.06	17.1211	15.6446	15.6778	15.1084
+	2.20732	-1.30614	0.4044	High	P61158	Actin-related protein 3 OS=Homo sapiens OX=9606	ACTR3	+	Cluster -803	1.66625	0.00946269	41.056	27	9	303	9	418	47.3	5.88		19.8111	19.1396	19.0404	17.9811	18.1293	17.9624	18.1365	17.1641	18.0287	18.0542	17.7903	18.4298	18.0517	18.5777	18.4061	17.8751	18.2529	17.6951	18.5025	18.3714	18.4208	18.9877	18.4999	18.2826
+	5.31925	-1.30818	0.403829	High	P08670	Vimentin OS=Homo sapiens OX=9606	VIM	+	Cluster -801	7.83558	0	218.139	58	28	4918	21	466	53.6	5.12		25.4488	25.4014	25.3435	24.0506	24.0832	24.1353	24.5112	23.5609	24.3024	24.0891	23.7698	23.8094	24.2033	24.308	24.2679	24.227	24.1444	24.19	24.2526	24.3081	24.2718	24.4518	24.3479	23.9644
+	2.21013	-1.30975	0.40339	High	P08727	Keratin, type I cytoskeletal 19 OS=Homo sapiens OX=9606	KRT19	+	Cluster -801	4.29358	6.94143e-05	55.76	21	10	1304	1	400	44.1	5.14		17.2248	16.3974	16.7543	15.3759	15.4743	15.597	15.4012	13.6357	14.9491	15.0267	15.0976	14.6816	15.0517	15.1076	15.1556	15.4538	15.5412	15.0406	15.0396	15.0396	14.9483	14.6512	14.618	13.9081
	0.894103	-1.31152	0.402895	High	Q9H773	dCTP pyrophosphatase 1 OS=Homo sapiens OX=9606	DCTPP1			NaN	NaN	2.893	8	1	16	1	170	18.7	5.03		13.8248	15.642	14.7198	12.5428	13.7913	13.9178	14.6891	14.0068	14.3985	14.3747	13.795	13.8362	13.9485	14.0724	14.0455	13.8943	13.8572	14.0606	14.0164	13.9388	14.3792	14.544	14.3268	14.4841
	1.11932	-1.31337	0.402379	High	MB0008	Proteine FAM GLY - GFP (echantillon 8)	FAM	+	Cluster -803	8.38759	0	308.759	49	25	11024	1	377	36.5	5.78	Met-loss+Acetyl [N-Term]	14.1302	12.6313	13.9556	12.8095	11.8641	12.1034	13.6433	13.658	12.4804	11.7774	12.2279	12.6535	13.065	13.5038	12.5709	12.5955	13.1601	10.9653	12.0343	13.364	12.9788	20.5881	20.5594	20.1063
+	3.07988	-1.31386	0.402243	High	P11940	Polyadenylate-binding protein 1 OS=Homo sapiens OX=9606	PABPC1	+	Cluster -801	9.15199	0	31.844	18	10	227	7	636	70.6	9.5		20.1729	19.8838	19.7567	18.5127	18.5863	18.7728	18.4631	17.5188	18.1558	18.5155	18.4299	18.1557	18.067	18.1085	18.054	19.0115	18.8668	18.9317	18.802	18.7652	18.8068	18.0401	18.0968	17.6717
+	2.12711	-1.33783	0.395615	High	P54652	Heat shock-related 70 kDa protein 2 OS=Homo sapiens OX=9606	HSPA2			NaN	NaN	39.187	9	6	1037	1	639	70	5.74		15.2863	15.7074	15.5107	13.9242	14.6396	13.9271	11.3763	13.5106	14.1629	13.8999	12.4285	13.5424	13.0468	14.1714	14.0723	13.7513	14.1154	14.6025	14.2186	14.3616	14.2555	11.4755	13.872	13.5406
+	2.492	-1.34125	0.394678	High	P06396	Gelsolin OS=Homo sapiens OX=9606	GSN			NaN	NaN	23.307	10	5	149	5	782	85.6	6.28		18.2092	17.9761	18.1471	16.5278	16.6128	17.168	17.3678	16.5568	16.8898	17.0241	16.7554	16.1992	17.238	17.6673	17.4254	17.179	16.697	16.7046	17.2544	16.9225	17.0218	17.0094	17.0001	17.2552
+	4.95288	-1.34662	0.393212	High	Q6KB66	Keratin, type II cytoskeletal 80 OS=Homo sapiens OX=9606	KRT80	+	Cluster -801	11.3332	0	45.003	23	10	904	9	452	50.5	5.67		20.166	20.0862	20.2177	18.7752	18.781	18.8739	17.8907	16.7027	17.7747	17.8348	17.4315	17.6755	17.4159	17.3706	17.4597	17.7625	17.4663	17.722	17.4984	17.4486	17.3726	17.1798	17.3813	16.5596
+	1.40562	-1.36185	0.389082	High	Q96C10	ATP-dependent RNA helicase DHX58 OS=Homo sapiens OX=9606	DHX58	+	Cluster -803	4.89935	5.08906e-05	9.84	7	4	39	4	678	76.6	7.37		15.8915	16.1991	16.0391	15.0558	13.7994	15.1889	15.9069	15.7437	16.4391	16.5868	16.0135	16.2553	15.67	16.1926	16.2307	14.976	14.5541	14.6758	16.6931	16.4107	16.5778	16.1453	16.4399	15.9314
+	3.05024	-1.36423	0.388441	High	P60903	Protein S100-A10 OS=Homo sapiens OX=9606	S100A10	+	Cluster -801	4.46336	6.36364e-05	3.061	10	1	130	1	97	11.2	7.37		18.1218	18.0582	17.6604	16.5147	16.6866	16.5465	15.8731	15.6594	15.7228	15.8646	16.0906	16.0597	16.1429	16.1855	16.9788	16.9787	16.833	16.9354	17.0263	16.9272	17.0112	15.9683	16.197	15.7802
	0.536577	-1.36482	0.388284	High	P46782	40S ribosomal protein S5 OS=Homo sapiens OX=9606	RPS5			NaN	NaN	3.203	6	1	6	1	204	22.9	9.72		13.4117	15.1008	15.4147	13.0463	11.7883	14.9981	12.6989	14.6377	14.9626	13.1661	12.5676	11.7241	14.1854	13.1357	13.1984	13.6547	15.2606	12.5636	14.2569	13.6213	14.0778	13.8095	14.2714	13.9626
	0.632179	-1.36867	0.387249	High	P25815	Protein S100-P OS=Homo sapiens OX=9606	S100P			NaN	NaN	9.016	24	2	26	2	95	10.4	4.88		17.0834	17.6173	16.6538	16.6541	16.7142	13.8802	13.9414	15.4761	15.8326	13.7575	13.8606	13.9058	13.8219	13.9257	16.8095	13.6865	13.6209	13.3136	14.1166	14.0278	14.028	14.3081	14.2435	13.8621
+	2.06886	-1.38097	0.38396	High	P55786	Puromycin-sensitive aminopeptidase OS=Homo sapiens OX=9606	NPEPPS	+	Cluster -801	3.65843	0.000200743	41.225	15	11	132	11	919	103.2	5.72		18.0068	18.2775	18.1686	16.2219	16.9932	17.0949	16.9036	15.3619	16.8779	16.2764	16.1285	15.9885	16.7533	16.4963	16.679	16.4765	16.4606	16.2068	16.7965	16.4216	17.0092	16.1238	16.0274	15.7329
+	1.88114	-1.39048	0.381437	High	Q96AQ6	Pre-B-cell leukemia transcription factor-interacting protein 1 OS=Homo sapiens OX=9606	PBXIP1	+	Cluster -803	4.00235	0.000121212	4.214	2	1	24	1	731	80.6	5.33		15.9596	14.9698	15.3657	13.7938	14.0011	14.3289	15.4401	14.5206	15.303	14.6529	14.2733	14.3932	14.8042	14.9283	14.7831	14.7499	14.8453	14.8018	15.1509	15.322	15.2842	15.3707	15.3855	14.9747
+	5.12321	-1.39135	0.381207	High	P60174	Triosephosphate isomerase OS=Homo sapiens OX=9606	TPI1	+	Cluster -801	6.38445	4.51128e-05	54.956	60	10	200	10	249	26.7	6.9		19.9495	19.9461	20.0249	18.6129	18.6287	18.5048	18.0639	16.6301	18.2629	18.0951	17.2074	16.9515	17.7875	17.8898	17.6851	18.0819	18.048	18.0399	17.559	17.5061	17.8596	17.2791	17.2491	17.0604
+	2.61049	-1.39511	0.380215	High	Q14574	Desmocollin-3 OS=Homo sapiens OX=9606	DSC3	+	Cluster -801	8.56867	0	5.047	4	2	18	2	896	99.9	6.1		17.0307	17.112	16.4728	15.407	15.4691	15.5541	14.8765	14.2563	15.01	14.5784	14.1211	14.157	13.94	14.2806	14.079	14.6499	14.4506	14.7583	14.1613	14.5211	14.6416	14.3437	14.5043	13.9824
	0.795224	-1.39618	0.379933	High	Q15646	2'-5'-oligoadenylate synthase-like protein OS=Homo sapiens OX=9606	OASL	+	Cluster -800	5.48764	3.61446e-05	13.49	11	4	26	4	514	59.2	7.87		14.65	12.9872	14.5595	13.339	13.2078	11.4614	13.085	12.3486	13.3552	14.0341	13.0831	12.6993	13.992	13.0304	13.3908	16.55	16.3732	16.4723	16.2584	16.3682	16.5765	14.4564	13.4059	12.9664
+	3.73682	-1.39753	0.379579	High	P24534	Elongation factor 1-beta OS=Homo sapiens OX=9606	EEF1B2	+	Cluster -803	4.91946	5.14139e-05	18.463	21	4	155	3	225	24.7	4.67		19.3593	19.0582	19.0901	17.7279	17.7288	17.8583	18.0188	17.5117	18.191	17.9879	17.8098	17.8084	18.1096	18.2133	18.1982	18.4116	18.1158	18.3203	18.3877	18.5129	18.3626	18.5043	18.3263	18.0817
+	1.7894	-1.40665	0.377187	High	Q9Y6H1	Coiled-coil-helix-coiled-coil-helix domain-containing protein 2 OS=Homo sapiens OX=9606	CHCHD2	+	Cluster -800	6.50134	4.70588e-05	11.003	25	2	17	2	151	15.5	9.22		14.0778	15.0136	15.0952	13.3313	13.5476	13.0878	13.4981	13.0683	13.1859	13.076	13.4592	13.0296	13.9806	12.7203	12.8319	18.4722	18.4278	18.4971	14.4994	13.1286	12.0116	12.4727	11.9343	13.6178
+	1.50648	-1.4135	0.3754	High	Q13057	Bifunctional coenzyme A synthase OS=Homo sapiens OX=9606	COASY	+	Cluster -803	2.9681	0.000540193	7.18	7	2	29	2	564	62.3	6.99		16.3521	16.8941	15.4185	14.8599	14.7066	14.8577	15.2644	14.6218	16.9963	14.8155	15.095	15.6202	14.6869	14.9227	15.0559	14.079	13.8592	13.8294	15.1854	15.9344	16.2479	16.9515	16.4837	16.241
+	4.84165	-1.42564	0.372255	High	P29401	Transketolase OS=Homo sapiens OX=9606	TKT	+	Cluster -801	5.12332	4.44444e-05	6.27	4	1	6	1	623	67.8	7.66		15.5084	15.5667	15.6535	14.1531	14.0848	14.2139	13.7646	12.6394	13.9358	13.6875	13.6452	13.5282	13.6142	13.2482	13.7336	12.4416	12.9798	11.777	13.6842	14.0599	13.5382	13.473	13.7647	12.6537
	0.88405	-1.43076	0.370936	High	P04062	Lysosomal acid glucosylceramidase OS=Homo sapiens OX=9606	GBA1	+	Cluster -800	2.61987	0.00108761	4.094	4	2	4	2	536	59.7	7.61		16.4456	15.9115	14.3726	13.5433	13.9229	14.9712	14.5584	13.1681	13.9095	14.3085	13.9414	11.5887	12.2934	14.078	12.3799	16.3377	16.2812	15.9722	12.7685	13.3128	13.9077	14.425	14.3816	14.362
+	3.86827	-1.4337	0.370179	High	Q9C075	Keratin, type I cytoskeletal 23 OS=Homo sapiens OX=9606	KRT23	+	Cluster -801	8.60742	0	16.798	18	5	108	4	422	48.1	6.54	Acetyl [N-Term]	17.4915	17.3245	17.4749	15.931	15.8949	16.1639	16.4354	16.0443	16.6581	13.7882	14.5451	14.303	14.2753	14.1974	14.6743	14.5765	13.762	14.5144	13.7554	14.4831	13.902	13.6743	14.0696	13.3001
	1.34592	-1.4402	0.368517	High	Q53H12	Acylglycerol kinase, mitochondrial OS=Homo sapiens OX=9606	AGK			NaN	NaN	5.04	9	2	22	2	422	47.1	8.09		16.2434	16.0072	16.3947	15.2681	15.2566	13.7999	16.1846	15.3812	15.5774	12.8771	13.0477	15.9672	15.8172	15.6887	15.6326	15.0097	15.5462	13.3119	15.3821	15.4139	16.0285	15.0474	15.2067	15.0949
+	3.7307	-1.44242	0.367948	High	O60437	Periplakin OS=Homo sapiens OX=9606	PPL	+	Cluster -801	8.99428	0	102.938	19	28	140	28	1756	204.6	5.6		19.4811	19.2907	19.2608	17.8879	17.7639	18.0536	16.9723	16.095	17.1863	16.6569	16.9058	16.7465	16.7853	16.2928	16.7167	16.4935	16.3458	16.645	16.6089	16.5149	16.5995	16.0425	16.545	15.5052
+	4.83368	-1.44309	0.367778	High	P21796	Voltage-dependent anion-selective channel protein 1 OS=Homo sapiens OX=9606	VDAC1	+	Cluster -801	10.8125	0	29.145	35	7	149	6	283	30.8	8.54		18.9497	18.8438	18.9071	17.5479	17.44	17.3835	17.1963	16.3174	17.1496	17.0652	16.9772	16.8576	17.2679	17.3052	17.3378	17.3793	17.3977	17.4489	17.4098	17.3489	17.2914	17.3733	17.2745	16.9669
+	5.43481	-1.44366	0.367634	High	P62987	Ubiquitin-60S ribosomal protein L40 OS=Homo sapiens OX=9606	UBA52	+	Cluster -801	7.2158	5.47945e-05	44.118	50	7	1058	7	128	14.7	9.83		22.7623	22.7477	22.8734	21.3652	21.3391	21.3482	21.0735	20.3939	21.2299	20.9097	20.7001	20.101	20.7539	21.0702	21.0314	22.1712	22.0752	22.1391	21.0481	21.303	20.646	20.7485	20.6018	20.6875
+	1.93576	-1.44572	0.36711	High	Q01518	Adenylyl cyclase-associated protein 1 OS=Homo sapiens OX=9606	CAP1	+	Cluster -801	4.23322	8.43882e-05	21.174	19	7	34	7	475	51.9	8.06	Met-loss+Acetyl [N-Term]	18.044	17.1195	17.1769	15.763	16.0132	16.2272	13.6711	14.2104	12.88	15.3105	14.8788	14.6109	16.1308	15.7389	15.9935	16.2519	15.8368	16.1663	15.0938	16.0676	16.0466	14.7254	14.987	15.1571
+	2.52925	-1.44869	0.366354	High	O75821	Eukaryotic translation initiation factor 3 subunit G OS=Homo sapiens OX=9606	EIF3G			NaN	NaN	4.92	4	1	13	1	320	35.6	6.13		15.022	14.6513	15.1718	13.1843	13.724	13.5908	13.9393	13.7456	13.7524	13.3086	12.9944	13.4877	14.2276	13.0176	12.7094	12.8207	12.9655	13.7049	13.2484	12.9939	13.0556	13.6197	13.4845	13.9394
	0.647513	-1.45588	0.364532	High	Q53H96	Pyrroline-5-carboxylate reductase 3 OS=Homo sapiens OX=9606	PYCR3			NaN	NaN	4.698	8	1	5	1	274	28.6	7.72		15.9817	13.0805	13.5966	12.6991	13.6316	11.9603	14.752	12.0011	14.6859	14.0514	14.2712	13.9908	12.8109	13.8753	14.4733	12.9203	12.1092	13.441	14.0175	14.4275	14.5928	14.5445	14.0075	14.2654
+	2.77193	-1.46094	0.363257	High	O15460	Prolyl 4-hydroxylase subunit alpha-2 OS=Homo sapiens OX=9606	P4HA2	+	Cluster -803	3.55939	0.00023741	9.075	9	4	75	4	535	60.9	5.71		18.0802	17.5348	17.5712	16.1516	16.2224	16.4294	16.7787	16.1712	16.6758	16.4004	16.5111	16.1038	16.7787	16.8531	16.8334	16.8806	16.9271	16.8208	16.6495	16.7286	16.9093	17.0361	17.0287	16.7431
+	2.67991	-1.46172	0.363061	High	O43707	Alpha-actinin-4 OS=Homo sapiens OX=9606	ACTN4	+	Cluster -801	6.77491	5.06329e-05	57.467	19	14	274	7	911	104.8	5.44		18.6863	18.108	18.333	16.7044	17.1168	16.9209	16.133	15.7199	16.3886	16.339	16.0694	16.2968	16.6043	16.724	16.5926	16.3814	16.6298	16.2814	16.2076	16.336	16.2712	16.3211	16.2441	15.9805
	1.30343	-1.46289	0.362766	High	P51116	RNA-binding protein FXR2 OS=Homo sapiens OX=9606	FXR2	+	Cluster -800	2.26982	0.00231136	4.623	3	2	39	1	673	74.2	6.23		13.4067	14.7976	13.6162	11.8859	12.7023	12.8436	13.2795	12.5162	13.1219	11.7946	12.1976	11.4231	13.1852	13.3102	13.1207	12.6427	13.2998	13.0351	13.5685	13.5335	13.7084	13.3147	12.8654	12.73
+	3.37393	-1.46346	0.362621	High	P32119	Peroxiredoxin-2 OS=Homo sapiens OX=9606	PRDX2	+	Cluster -801	4.43626	7.23982e-05	22.117	32	4	649	3	198	21.9	5.97		19.0129	18.8628	19.0332	17.6005	17.6593	17.2586	17.7455	16.5241	17.7162	17.0411	17.1126	17.1825	17.4726	17.5522	17.5304	17.0987	16.9204	16.9981	17.2008	17.2552	17.6889	17.6863	17.5466	17.1914
+	2.04	-1.46924	0.361172	High	Q14204	Cytoplasmic dynein 1 heavy chain 1 OS=Homo sapiens OX=9606	DYNC1H1	+	Cluster -803	2.2875	0.00219774	18.006	2	7	34	7	4646	532.1	6.4		17.873	17.3731	17.5727	15.5964	16.322	16.4925	16.0293	15.5403	16.586	17.1195	16.7359	16.8955	17.059	16.5228	16.9652	16.8031	16.8269	16.0996	17.3198	16.9301	16.9893	17.2631	17.466	16.4574
+	4.01149	-1.47161	0.360579	High	Q5T750	Skin-specific protein 32 OS=Homo sapiens OX=9606	XP32	+	Cluster -801	11.1584	0	25.425	30	6	78	6	250	26.2	7.97		20.8311	20.5668	20.5657	19.1341	19.1706	19.2442	18.7418	17.9711	18.596	18.8194	18.6819	18.59	18.516	18.6025	18.5533	18.5954	18.4951	18.4321	18.5054	18.4118	18.4765	18.135	18.1549	18.1425
	1.02253	-1.47895	0.35875	High	O43324	Eukaryotic translation elongation factor 1 epsilon-1 OS=Homo sapiens OX=9606	EEF1E1			NaN	NaN	4.321	7	1	7	1	174	19.8	8.54	Met-loss+Acetyl [N-Term]	13.8616	14.2619	14.6401	11.9247	14.0308	12.3712	12.2804	14.165	14.8409	13.5835	14.5043	14.7372	14.0184	14.5848	14.848	14.4219	11.4646	14.1282	14.7042	14.9002	14.8438	14.4915	14.8395	15.609
+	4.62413	-1.4811	0.358215	High	P62861	FAU ubiquitin-like and ribosomal protein S30 OS=Homo sapiens OX=9606	FAU	+	Cluster -801	8.41128	0	4.293	8	1	72	1	133	14.4	10.17		20.4026	20.4906	20.2891	18.8675	18.9736	18.8979	19.6211	18.9342	19.4786	18.9825	18.7377	18.7144	18.8119	18.8993	18.7865	18.974	19.0023	19.0558	19.5005	19.3741	19.4547	19.3054	19.0899	18.9264
+	4.19605	-1.48318	0.357699	High	Q9C035	Tripartite motif-containing protein 5 OS=Homo sapiens OX=9606	TRIM5	+	Cluster -801	12.2454	0	32.119	19	8	340	8	493	56.3	6.05	Met-loss+Acetyl [N-Term]	23.1759	22.8902	22.9723	21.541	21.5253	21.5225	21.0463	20.3702	21.1777	20.8065	20.3575	20.3564	20.1272	20.2746	20.1931	20.5293	20.4506	20.4488	20.5413	20.4904	20.6324	19.9871	19.8698	19.9437
+	2.998	-1.51295	0.350393	High	P00491	Purine nucleoside phosphorylase OS=Homo sapiens OX=9606	PNP	+	Cluster -801	6.11435	4.13793e-05	6.154	10	3	14	3	289	32.1	6.95		17.0062	16.6798	17.1043	15.4685	15.5951	15.1878	15.0257	13.5162	14.6514	14.3522	13.7748	13.7009	14.2219	14.5028	13.529	15.1613	14.8637	14.5136	13.6688	14.4748	13.756	13.5989	13.7589	13.5374
+	2.41578	-1.51567	0.349734	High	P14735	Insulin-degrading enzyme OS=Homo sapiens OX=9606	IDE			NaN	NaN	47.835	12	11	70	11	1019	117.9	6.61		17.8343	17.0596	17.7833	15.9934	16.0429	16.094	16.5202	15.5368	16.5936	16.1833	16.1464	15.9498	14.4386	16.3352	16.4831	13.5047	14.4233	16.5174	16.1901	16.4473	16.2997	16.0717	16.0715	15.8952
+	3.12071	-1.5208	0.348492	High	Q9UGL9	Cysteine-rich C-terminal protein 1 OS=Homo sapiens OX=9606	CRCT1	+	Cluster -801	4.46522	6.39269e-05	14.718	51	2	7	2	99	9.7	8.66		16.2153	16.2507	16.0914	14.3619	14.7452	14.8879	12.4885	11.2822	12.8068	13.2844	12.1793	13.261	13.6789	12.3928	11.9733	13.1754	14.2375	13.4453	12.7232	13.1701	11.7915	12.3922	12.6367	13.4124
	0.506454	-1.53071	0.346108	High	O15511	Actin-related protein 2/3 complex subunit 5 OS=Homo sapiens OX=9606	ARPC5			NaN	NaN	3.797	8	1	79	1	151	16.3	5.67		16.3252	15.6306	16.1692	15.8109	15.8228	11.8993	15.6961	12.6267	15.6679	15.1819	15.17	15.0609	15.3349	15.437	15.4066	15.5132	15.5358	15.5011	15.6369	15.5258	15.5823	15.4902	15.5081	11.6703
+	6.36079	-1.53127	0.345972	High	P15924	Desmoplakin OS=Homo sapiens OX=9606	DSP	+	Cluster -801	13.7586	0	454.522	39	105	2618	105	2871	331.6	6.81		24.6193	24.5915	24.6207	23.0469	23.0664	23.1244	22.2094	21.1758	21.8134	21.9768	21.7923	21.8753	21.7115	21.6844	21.6216	21.9508	21.9577	22.134	21.7833	22.0035	21.8775	21.427	21.447	20.9148
+	5.89398	-1.53481	0.345126	High	P00738	Haptoglobin OS=Homo sapiens OX=9606	HP	+	Cluster -801	19.1528	0	39.597	25	8	143	8	406	45.2	6.58		24.2429	24.3334	24.2436	22.7509	22.7114	22.7532	19.5867	18.779	19.432	21.3599	21.3338	21.2633	20.5345	20.6865	20.6552	21.1253	21.108	21.1567	20.9753	21.0463	21.0573	20.1384	20.1177	20.0195
+	4.06833	-1.53735	0.344518	High	P68104	Elongation factor 1-alpha 1 OS=Homo sapiens OX=9606	EEF1A1	+	Cluster -801	11.3524	0	175.624	38	15	1960	15	462	50.1	9.01		25.7652	26.0395	26.0554	24.423	24.4336	24.3915	24.4461	23.7089	24.4536	24.0931	23.8066	23.7664	23.9195	24.0708	23.9987	23.9672	23.9791	23.9889	24.2388	24.2457	24.2669	23.9045	23.9223	23.7123
+	2.37277	-1.561	0.338915	High	Q04637	Eukaryotic translation initiation factor 4 gamma 1 OS=Homo sapiens OX=9606	EIF4G1			NaN	NaN	6.703	2	3	5	3	1599	175.4	5.33		13.92	14.2551	13.9009	12.152	12.304	12.9371	12.8293	11.1536	13.5813	12.8159	11.7659	12.5639	12.6293	12.8305	12.7613	12.8864	12.6119	12.346	12.9368	13.0617	12.7871	12.8707	12.6183	12.9671
	0.512862	-1.56587	0.337773	High	P54922	ADP-ribosylhydrolase ARH1 OS=Homo sapiens OX=9606	ADPRH			NaN	NaN	2.963	4	1	3	1	357	39.5	6.52		12.7258	16.5261	13.9986	11.4609	13.9746	13.1174	10.2296	10.8967	14.0268	14.1303	14.7816	14.2319	13.5336	10.9659	10.9983	13.8036	12.802	13.703	12.733	14.0978	13.8838	12.0925	14.0669	13.2779
+	2.94041	-1.57197	0.336348	High	P14678	Small nuclear ribonucleoprotein-associated proteins B and B' OS=Homo sapiens OX=9606	SNRPB	+	Cluster -801	5.06863	5.39084e-05	2.662	3	1	6	1	240	24.6	11.19		15.0846	15.3835	15.2694	13.4891	14.0093	13.5232	14.4912	13.594	14.2648	13.3606	13.0083	12.8197	13.7423	13.7529	13.8599	14.2179	14.0165	14.3136	14.4082	13.8925	13.8593	14.0846	13.748	13.5666
+	3.9856	-1.5744	0.335783	High	Q8TD55	Pleckstrin homology domain-containing family O member 2 OS=Homo sapiens OX=9606	PLEKHO2	+	Cluster -803	1.97828	0.00436794	8.344	8	2	38	2	490	53.3	5.43		16.0393	15.766	15.892	14.4337	14.2096	14.3308	15.775	14.9789	15.7112	14.8329	14.7753	14.2969	14.3328	14.5549	14.6468	15.1153	15.0603	13.4659	14.5958	14.8554	14.6954	15.2195	15.1511	14.9155
+	3.20181	-1.57939	0.334624	High	P27824	Calnexin OS=Homo sapiens OX=9606	CANX	+	Cluster -801	3.76762	0.00016	8.673	7	3	61	3	592	67.5	4.6		17.2666	16.9357	16.8241	15.2434	15.5037	15.5411	14.4381	13.9988	14.3607	15.4238	14.8814	15.2752	15.7519	15.826	15.7418	17.7906	15.9782	16.0561	15.9153	15.6705	16.2113	15.7042	15.7347	15.1695
+	4.16093	-1.57963	0.334567	High	P11279	Lysosome-associated membrane glycoprotein 1 OS=Homo sapiens OX=9606	LAMP1	+	Cluster -801	5.11766	4.40771e-05	2.947	3	1	8	1	417	44.9	8.75		16.892	16.9017	17.0588	15.2631	15.5156	15.335	15.0899	13.6486	15.0616	13.2144	14.2208	13.9951	14.8952	14.9046	14.9742	15.0963	14.5947	14.2855	14.4188	14.6818	14.4773	14.407	14.3413	13.5256
+	1.3528	-1.5807	0.33432	High	Q86V81	THO complex subunit 4 OS=Homo sapiens OX=9606	ALYREF			NaN	NaN	2.805	7	1	10	1	257	26.9	11.15		15.4286	15.2616	15.6831	12.8139	14.3616	14.4556	14.6361	13.6988	14.8127	14.1073	14.0356	13.7161	14.9272	14.8591	15.032	15.2117	15.0669	15.2261	14.7755	14.7236	15.0248	14.693	14.7511	12.686
	1.25226	-1.59055	0.332045	High	P15309	Prostatic acid phosphatase OS=Homo sapiens OX=9606	ACP3			NaN	NaN	2.806	3	1	8	1	386	44.5	6.24		14.7327	14.7383	14.4406	12.6798	12.2624	14.1978	12.0258	12.8443	13.4695	11.5763	12.5167	12.3212	12.2912	12.7184	11.9409	14.0164	11.8978	12.9853	12.404	11.7993	11.2329	12.806	12.535	13.3199
+	1.9362	-1.60881	0.327869	High	P34932	Heat shock 70 kDa protein 4 OS=Homo sapiens OX=9606	HSPA4			NaN	NaN	7.085	3	2	12	2	840	94.3	5.19		14.9718	14.1398	14.918	13.4836	13.0887	12.6309	13.7528	13.7682	13.6207	13.3393	12.2841	13.4343	13.7041	14.1896	14.2688	14.7013	13.8877	14.5979	13.5517	13.734	13.4219	13.4808	14.0395	14.0099
+	2.07529	-1.65157	0.318294	High	P02790	Hemopexin OS=Homo sapiens OX=9606	HPX			NaN	NaN	38.654	31	9	90	9	462	51.6	7.02		18.3919	18.78	17.729	16.4366	16.5724	16.9372	16.9069	16.0651	12.0819	17.2331	17.0681	11.3836	13.783	13.0224	14.2547	18.3442	14.3972	17.8933	17.5559	12.5034	12.071	12.0139	13.1962	10.9872
+	4.92943	-1.67208	0.3138	High	Q9BYE4	Small proline-rich protein 2G OS=Homo sapiens OX=9606	SPRR2G	+	Cluster -801	9.92758	0	33.568	62	3	222	1	73	8.2	7.96		17.343	17.1625	17.2769	15.6566	15.5519	15.5575	14.8946	14.3705	15.0167	13.7752	13.587	13.4691	13.2988	12.7486	13.4189	13.728	14.437	14.0158	12.9409	13.6571	12.7877	12.8256	12.0182	12.3664
+	2.93103	-1.67424	0.31333	High	P60900	Proteasome subunit alpha type-6 OS=Homo sapiens OX=9606	PSMA6	+	Cluster -801	3.14441	0.000430464	11.402	18	4	25	4	246	27.4	6.76		17.437	17.3987	17.5145	16.159	15.4859	15.6826	15.2813	14.8152	15.1669	16.0873	15.7931	14.6761	15.0154	15.1366	15.8749	15.9834	15.8016	15.9416	15.7805	15.7505	15.9378	15.8031	15.7932	15.6421
+	5.01357	-1.69714	0.308397	High	O75223	Gamma-glutamylcyclotransferase OS=Homo sapiens OX=9606	GGCT	+	Cluster -801	8.86317	0	19.957	37	5	157	5	188	21	5.14		19.839	19.859	19.9446	18.191	18.2687	18.0916	17.8766	16.6939	17.9155	17.6353	17.4676	17.4262	17.2993	17.5823	17.3001	17.6076	17.513	17.5202	17.2951	16.7292	17.2236	17.2267	16.8867	16.3086
+	1.80533	-1.70739	0.306213	High	P16152	Carbonyl reductase [NADPH] 1 OS=Homo sapiens OX=9606	CBR1	+	Cluster -803	4.19094	9.1858e-05	29.032	32	6	79	6	277	30.4	8.32	Met-loss+Acetyl [N-Term]	18.1791	18.0811	17.3423	15.5039	16.4197	16.5566	18.1381	17.2432	16.8424	16.4564	16.6644	16.6539	16.2391	16.5686	16.5772	15.1761	13.8278	14.5429	16.7751	16.2675	16.8529	17.7742	16.5616	17.0721
+	3.5638	-1.71692	0.304197	High	Q92820	Gamma-glutamyl hydrolase OS=Homo sapiens OX=9606	GGH	+	Cluster -801	4.57111	6.52681e-05	5.714	8	2	4	2	318	35.9	7.11		16.9694	17.3454	17.3945	15.4233	15.5702	15.5651	14.1379	11.711	13.7082	14.3552	14.0894	14.0405	13.6678	13.5958	13.7808	14.9249	14.8133	15.1895	14.9643	13.5028	14.7744	13.6098	14.8632	12.5662
+	1.6548	-1.71779	0.304015	High	P51659	Peroxisomal multifunctional enzyme type 2 OS=Homo sapiens OX=9606	HSD17B4	+	Cluster -803	3.62305	0.000205128	13.502	9	4	15	4	736	79.6	8.84		15.6263	16.3299	16.3089	13.9656	15.1961	13.95	16.0586	15.1725	15.7828	14.0802	14.7607	13.6255	14.7637	15.2745	14.8117	12.2865	12.6465	13.8064	15.4415	15.024	15.1429	14.3988	15.0669	15.1389
+	2.39017	-1.72999	0.301454	High	Q8N5A5	Zinc finger CCCH-type with G patch domain-containing protein OS=Homo sapiens OX=9606	ZGPAT	+	Cluster -803	4.30264	6.9869e-05	2.672	2	1	6	1	531	57.3	5.43		15.3901	15.0273	15.2041	13.5702	12.9652	13.896	14.8052	14.2311	14.8366	14.4569	13.9374	14.1033	14.1192	14.4703	14.2137	13.3956	13.577	13.8251	14.166	14.2761	14.0346	14.4372	14.5104	14.549
+	4.16568	-1.73715	0.299962	High	P04406	Glyceraldehyde-3-phosphate dehydrogenase OS=Homo sapiens OX=9606	GAPDH	+	Cluster -801	9.08295	0	81.82	38	8	414	8	335	36	8.46		22.3833	22.2287	22.245	20.3712	20.6282	20.6461	20.8787	20.0589	20.7164	20.345	20.3961	20.351	20.4851	20.6039	20.5825	20.6534	20.629	20.7041	20.5985	20.6131	20.6787	20.6504	20.7078	20.4287
+	2.82	-1.74699	0.297922	High	P07339	Cathepsin D OS=Homo sapiens OX=9606	CTSD	+	Cluster -801	4.87583	5.01253e-05	13.967	13	5	110	5	412	44.5	6.54		19.4973	19.2554	19.3563	17.9548	17.6933	17.2199	17.3572	16.5093	17.4506	17.0835	17.124	16.3486	16.4956	16.0737	16.4561	17.3988	16.9616	17.0196	16.1569	17.1987	17.0457	16.4664	16.8393	16.8896
+	3.48019	-1.74882	0.297544	High	P25789	Proteasome subunit alpha type-4 OS=Homo sapiens OX=9606	PSMA4	+	Cluster -801	7.78464	0	4.181	4	1	46	1	261	29.5	7.72		16.6756	17.0142	16.5431	15.0316	14.8781	15.0767	14.5098	13.961	14.8019	14.9451	14.5698	14.6978	14.5759	14.8873	14.5596	14.7787	14.6353	14.898	14.983	14.8441	14.8368	14.9971	14.9157	14.6968
+	4.2974	-1.77313	0.292573	High	P12035	Keratin, type II cytoskeletal 3 OS=Homo sapiens OX=9606	KRT3	+	Cluster -801	15.1215	0	68.293	19	15	2075	3	628	64.4	6.48		23.0647	22.865	22.7991	21.0332	21.2101	21.1661	20.2946	19.2848	20.2855	20.126	20.0307	19.9016	19.3381	19.4585	19.3363	19.9973	20.0284	19.9733	19.5422	19.6304	19.768	18.939	18.9268	18.781
+	4.52155	-1.77758	0.291673	High	P22735	Protein-glutamine gamma-glutamyltransferase K OS=Homo sapiens OX=9606	TGM1	+	Cluster -801	6.52986	4.74308e-05	15.424	6	4	37	4	817	89.7	6.04		18.6285	18.4648	18.7037	16.8917	16.7338	16.8388	16.1998	13.6413	16.0899	16.1203	15.8313	16.0799	14.8434	14.9826	15.0859	15.963	15.9611	15.9142	15.4862	15.3638	15.4977	15.1196	15.1972	14.6619
+	4.74367	-1.81117	0.28496	High	Q13835	Plakophilin-1 OS=Homo sapiens OX=9606	PKP1	+	Cluster -801	9.04335	0	58.342	24	13	179	13	747	82.8	9.13		20.1148	19.9343	19.8639	18.1785	18.1626	18.1384	16.934	16.164	16.3817	16.9171	16.5188	16.4168	16.6034	16.0176	16.0712	16.6873	16.1469	16.0895	16.2235	16.76	16.1059	15.4425	14.972	13.8724
+	2.30466	-1.81742	0.283728	High	A0A0A0MRZ8	Immunoglobulin kappa variable 3D-11 OS=Homo sapiens OX=9606	IGKV3D-11			NaN	NaN	2.859	8	1	15	1	115	12.6	5.29		13.428	14.2104	13.5405	11.9208	11.5345	12.2714	12.5421	12.3003	13.3584	13.4693	12.0425	12.8919	12.361	13.0746	13.2697	12.3158	13.5595	13.0735	12.2056	13.9918	12.5757	13.1468	12.5929	12.4465
	0.678109	-1.84439	0.278474	High	P19971	Thymidine phosphorylase OS=Homo sapiens OX=9606	TYMP			NaN	NaN	14.41	18	5	30	5	482	49.9	5.53	Met-loss+Acetyl [N-Term]	13.74	12.2943	16.4463	12.7387	12.0355	12.1733	13.5573	12.7996	13.9691	12.9179	13.2611	13.3683	12.3684	9.88326	12.7027	12.2757	12.6544	12.7484	13.8891	12.4012	12.9247	12.8042	12.4248	12.58
+	3.73035	-1.84684	0.278001	High	Q5D862	Filaggrin-2 OS=Homo sapiens OX=9606	FLG2	+	Cluster -801	6.07409	4.0678e-05	59.716	8	10	222	10	2391	247.9	8.31		21.3987	21.7895	21.6911	19.6839	19.7281	19.9268	19.5988	19.2186	19.9771	19.673	19.4499	19.5312	18.7041	19.1931	19.9051	19.863	19.6961	19.8906	19.2672	18.6776	18.6643	19.1513	19.0744	18.8477
+	5.72418	-1.85208	0.276992	High	P31946	14-3-3 protein beta/alpha OS=Homo sapiens OX=9606	YWHAB	+	Cluster -801	12.1192	0	33.279	37	7	279	5	246	28.1	4.83	Met-loss+Acetyl [N-Term]	20.4555	20.3371	20.3365	18.5377	18.4868	18.5485	17.3875	16.8853	17.8223	17.7297	17.6973	17.4609	17.1068	17.0667	17.0903	19.3354	19.349	19.2165	16.9799	17.0135	17.2345	16.7951	16.5328	16.9176
+	2.13282	-1.86072	0.275339	High	P00450	Ceruloplasmin OS=Homo sapiens OX=9606	CP	+	Cluster -801	2.83708	0.000698113	12.121	5	4	17	4	1065	122.1	5.72		17.2532	16.7042	15.988	14.8463	14.6781	14.8389	12.6273	14.6364	12.9556	12.5573	13.1421	12.5535	13.0831	13.2788	14.549	13.4825	13.9408	11.861	14.933	15.1852	15.3662	13.1572	12.8608	13.0829
+	5.86051	-1.88387	0.270956	High	P53396	ATP-citrate synthase OS=Homo sapiens OX=9606	ACLY	+	Cluster -801	13.7539	0	61.264	16	14	558	14	1101	120.8	7.33		22.9345	22.8737	22.8474	20.978	20.961	21.065	20.9153	20.3022	20.8297	20.7111	20.3753	20.3892	20.4716	20.5385	20.5309	20.4991	20.4894	20.4983	20.6587	20.621	20.6001	20.5051	20.4812	20.3598
+	6.38435	-1.92928	0.262561	High	Q96P63	Serpin B12 OS=Homo sapiens OX=9606	SERPINB12	+	Cluster -801	18.3922	0	25.131	22	6	176	6	405	46.2	5.53		20.8363	20.887	20.8138	18.9312	18.8722	18.9459	17.9049	17.0236	17.8544	18.4485	18.3937	18.03	17.1898	17.3586	17.2691	18.0151	17.9864	18.0691	17.3033	17.2729	17.2903	16.862	16.8642	16.5905
	1.14603	-1.93749	0.26107	High	Q9UJX2	Cell division cycle protein 23 homolog OS=Homo sapiens OX=9606	CDC23	+	Cluster -801	3.8456	0.000155642	26.807	16	7	55	7	597	68.8	7.02		15.2624	15.234	14.7232	14.6865	12.3372	12.3835	13.1671	10.8249	11.9013	12.7832	11.7328	11.6526	11.9468	13.7942	11.6342	15.6784	15.9392	16.3209	12.6237	13.1047	13.7081	11.9729	12.055	12.5368
+	3.76962	-1.94079	0.260474	High	P23490	Loricrin OS=Homo sapiens OX=9606	LORICRIN	+	Cluster -801	10.8342	0	3.915	4	1	16	1	312	25.7	8.09		18.0498	17.6115	17.787	16.0046	15.8056	15.8156	15.4562	14.6698	15.2735	15.1054	14.9164	15.2761	14.9636	14.8275	14.8878	15.1066	15.0967	15.2946	14.3851	14.6375	14.4253	14.835	14.5712	14.3802
	1.12646	-1.94654	0.259438	High	P08559	Pyruvate dehydrogenase E1 component subunit alpha, somatic form, mitochondrial OS=Homo sapiens OX=9606	PDHA1			NaN	NaN	9.694	9	3	48	3	390	43.3	8.06		16.3855	16.3353	16.3825	16.0348	13.4485	13.7803	14.9992	14.7756	13.9638	14.0835	13.4852	15.2252	13.8299	14.802	15.0383	13.0909	14.7316	13.2235	15.0689	14.908	15.06	14.6687	13.9805	14.4007
+	2.0702	-1.95364	0.258164	High	Q9NZD2	Glycolipid transfer protein OS=Homo sapiens OX=9606	GLTP			NaN	NaN	5.502	11	2	9	2	209	23.8	7.39		15.0666	14.8461	14.8157	12.5823	12.5352	13.75	13.6224	12.6966	13.5057	13.183	14.0514	12.6043	12.6673	13.5404	12.292	13.3724	12.5896	11.7097	11.8299	14.0638	12.7235	12.7923	13.0727	12.9077
+	5.17631	-1.95698	0.257567	High	Q08188	Protein-glutamine gamma-glutamyltransferase E OS=Homo sapiens OX=9606	TGM3	+	Cluster -801	14.3705	0	39.977	18	9	278	9	693	76.6	5.86		20.4274	20.4278	20.5513	18.4164	18.5744	18.5448	18.1997	17.218	17.9821	18.0352	18.0252	18.004	17.0096	17.2117	17.2273	17.7788	17.5185	17.4917	17.3713	17.4799	17.3167	17.188	17.1035	16.8403
+	3.76669	-1.96001	0.257027	High	P56537	Eukaryotic translation initiation factor 6 OS=Homo sapiens OX=9606	EIF6	+	Cluster -801	7.62003	2.04082e-05	4.039	4	1	40	1	245	26.6	4.68		16.5658	17.0518	16.8191	14.8101	14.9205	14.8261	14.6474	14.0371	14.4424	15.0154	14.5346	14.8232	15.1735	15.2257	15.0332	15.5725	15.4092	15.7387	15.191	15.342	15.0426	15.371	15.2679	14.9204
+	1.86728	-1.97703	0.254012	High	Q5XKE5	Keratin, type II cytoskeletal 79 OS=Homo sapiens OX=9606	KRT79	+	Cluster -801	5.05093	5.34759e-05	60.568	19	13	1938	3	535	57.8	7.2		18.7398	17.1503	18.2264	16.1233	16.0092	16.0529	16.295	15.3412	16.1342	16.463	15.5246	15.3479	15.1149	15.4954	15.0642	15.2799	15.5027	15.3721	14.7587	14.8555	14.6273	15.4155	15.2575	15.6004
	0.912206	-1.97984	0.253518	High	P02679	Fibrinogen gamma chain OS=Homo sapiens OX=9606	FGG			NaN	NaN	35.856	19	7	155	7	453	51.5	5.62		16.2795	15.6656	13.007	12.8983	13.2717	12.8425	13.1886	12.1373	12.7809	13.5903	13.0267	12.9357	12.3598	13.516	12.5244	12.9517	11.9843	14.2778	13.8214	11.985	13.2646	13.0845	13.8612	11.3052
+	5.73698	-1.98226	0.253093	High	Q02413	Desmoglein-1 OS=Homo sapiens OX=9606	DSG1	+	Cluster -801	14.0902	0	125.755	27	18	425	18	1049	113.7	5.03		22.012	21.9702	22.0803	19.9734	20.0871	20.0552	19.3992	18.6282	19.4819	19.4097	19.1457	19.136	20.8789	21.0311	21.1456	19.3371	19.4921	19.6272	18.9341	18.6948	18.7056	18.4464	18.2407	18.4151
+	3.62644	-1.98528	0.252564	High	P18206	Vinculin OS=Homo sapiens OX=9606	VCL	+	Cluster -801	3.54556	0.000251346	8.258	3	3	10	3	1134	123.7	5.66		17.0817	16.7051	16.745	14.8106	14.7058	15.0595	14.8454	12.7214	14.6989	14.2234	12.7284	14.0864	12.9472	14.3349	14.2612	14.5827	14.678	14.6697	13.9083	14.1997	14.3422	13.9372	14.0913	13.1843
+	5.41357	-2.01681	0.247104	High	Q8N1N4	Keratin, type II cytoskeletal 78 OS=Homo sapiens OX=9606	KRT78	+	Cluster -801	17.9151	0	64.734	29	15	1375	11	520	56.8	6.02		21.8287	21.8807	21.8326	19.7319	19.8389	19.9208	19.2626	18.5066	19.1634	19.2973	19.3025	19.0536	18.6195	18.6793	18.7448	19.2693	19.2573	19.351	18.9128	18.905	18.944	18.4918	18.5409	18.2909
+	4.86917	-2.0336	0.244244	High	Q14315	Filamin-C OS=Homo sapiens OX=9606	FLNC	+	Cluster -801	12.5511	0	248.357	26	49	2091	44	2725	290.8	5.97		24.3471	24.1158	24.1139	22.1473	22.1392	22.1896	22.2673	21.5139	22.1495	21.9029	21.6862	21.738	22.1614	22.2724	22.1995	22.3667	22.2936	22.3468	21.9683	22.0898	22.0596	22.0124	22.0226	21.6693
+	5.92709	-2.05868	0.240036	High	P05089	Arginase-1 OS=Homo sapiens OX=9606	ARG1	+	Cluster -801	15.9084	0	35.308	39	9	330	9	322	34.7	7.21		21.0878	21.1043	21.2021	19.0805	19.1112	19.0265	18.386	17.4903	18.4706	18.6279	18.4483	18.2521	17.6481	17.7891	17.8255	18.5732	18.4405	18.603	18.0088	18.1448	18.0903	17.5038	17.2102	16.9708
+	6.32059	-2.07288	0.237684	High	Q08554	Desmocollin-1 OS=Homo sapiens OX=9606	DSC1	+	Cluster -801	11.4085	0	43.395	14	8	283	8	894	99.9	5.43		20.6977	20.6134	20.7161	18.5982	18.5801	18.6303	17.9733	17.1772	17.8981	17.9123	17.9638	17.8911	17.4205	17.3324	17.3659	18.3188	18.2813	18.4687	17.7119	17.609	17.4755	17.3578	17.3699	16.3694
+	4.44038	-2.09878	0.233455	High	Q8IUR6	CREB3 regulatory factor OS=Homo sapiens OX=9606	CREBRF	+	Cluster -801	12.697	0	3.237	1	1	110	1	639	72.1	4.87		21.8088	22.0785	21.7378	19.7517	19.7905	19.7866	19.525	18.7994	19.3447	19.3857	19.4135	19.3327	19.2081	19.3965	19.3717	19.6096	19.5439	19.6048	19.2938	19.3087	19.3685	19.1607	19.1573	18.8674
+	5.36916	-2.1097	0.231695	High	P04264	Keratin, type II cytoskeletal 1 OS=Homo sapiens OX=9606	KRT1	+	Cluster -801	16.7504	0	557.873	66	54	14073	44	644	66	8.12		29.3437	29.532	29.511	27.3274	27.3787	27.3514	26.3881	25.7469	26.4986	26.8252	26.5737	26.5918	25.6846	25.9426	25.8036	26.6064	26.5285	26.5162	26.0076	26.122	26.08	25.5503	25.4859	25.3476
+	5.76508	-2.11356	0.231076	High	P42357	Histidine ammonia-lyase OS=Homo sapiens OX=9606	HAL	+	Cluster -801	12.6734	0	44.553	23	12	153	12	657	72.7	6.95		20.1517	20.2508	20.2694	18.0973	18.0617	18.1722	17.6516	16.4689	17.3643	17.2642	17.0871	17.2575	16.8981	16.7122	16.8042	17.0234	17.2019	17.2887	16.7554	16.377	16.3381	16.8911	16.6819	16.2336
+	1.80462	-2.13545	0.227596	High	Q9BX40	Protein LSM14 homolog B OS=Homo sapiens OX=9606	LSM14B	+	Cluster -800	4.41116	7.17489e-05	5.451	6	2	6	2	385	42	9.69		15.2468	14.4172	13.4554	12.2823	12.4037	12.0271	13.5957	11.2736	13.356	12.4418	13.6377	12.2069	13.9189	13.0959	13.7783	16.7128	16.5844	15.5855	13.6099	13.06	14.1544	13.807	13.9667	13.2605
+	3.35862	-2.16321	0.223258	High	Q5T5B0	Late cornified envelope protein 3E OS=Homo sapiens OX=9606	LCE3E	+	Cluster -801	1.8974	0.00539559	7.402	37	1	6	1	92	9.5	8.63		14.4645	14.6066	14.9743	12.5838	12.2601	12.7118	13.5538	11.6808	14.1029	12.7893	12.1099	12.5436	11.1746	11.9924	12.5114	13.5367	12.8291	13.8137	12.4791	13.0989	12.0534	12.3264	13.4447	10.9462
	1.14861	-2.17253	0.221821	High	P16070	CD44 antigen OS=Homo sapiens OX=9606	CD44			NaN	NaN	5.711	3	2	12	2	742	81.5	5.33		16.1665	15.9129	16.1497	14.9004	14.6739	12.1372	15.174	14.3164	15.0797	14.7167	14.9943	14.7192	15.548	15.3437	15.5142	15.2989	15.2548	15.4034	15.3029	15.3633	15.0279	14.9958	14.988	14.3763
+	4.27193	-2.17467	0.221492	High	P01877	Immunoglobulin heavy constant alpha 2 OS=Homo sapiens OX=9606	IGHA2	+	Cluster -801	10.6275	0	9.841	7	2	67	1	340	36.6	6.27		16.5726	16.3025	16.2661	14.2088	14.0828	14.3255	14.2832	13.6465	14.1031	14.0949	13.9595	14.0252	14.1955	13.9873	14.0519	14.0705	14.1321	14.1502	13.6658	13.7493	13.8382	14.4307	14.4118	14.0509
	1.06524	-2.1846	0.219973	High	P23381	Tryptophan--tRNA ligase, cytoplasmic OS=Homo sapiens OX=9606	WARS1			NaN	NaN	3.612	3	1	22	1	471	53.1	6.23		16.2869	16.1307	16.473	14.7559	12.2262	15.3547	15.5445	15.0174	15.6345	15.2316	14.954	14.9967	14.9979	15.2576	15.257	14.2665	14.7315	14.6065	15.3669	15.1232	15.2302	14.2766	14.5367	14.3221
+	3.5108	-2.18965	0.219205	High	Q08211	ATP-dependent RNA helicase A OS=Homo sapiens OX=9606	DHX9	+	Cluster -801	5.87056	3.87097e-05	10.788	5	4	28	4	1270	140.9	6.84		18.3963	18.9715	18.8791	16.4589	16.5577	16.6614	16.6875	16.1012	17.1101	16.8297	16.4932	16.154	16.7073	16.6009	16.7683	17.5916	17.4515	16.9527	16.7457	17.0179	16.8261	16.4032	16.646	16.3209
+	4.87028	-2.19294	0.218705	High	P81605	Dermcidin OS=Homo sapiens OX=9606	DCD	+	Cluster -801	13.1845	0	8.553	20	2	230	2	110	11.3	6.54		21.3574	21.1798	21.4266	19.0774	19.094	19.2136	18.6353	17.5992	18.3642	19.0585	19.1369	19.073	18.7569	18.8255	18.884	19.5688	19.4643	19.6069	18.6112	18.6346	18.7321	18.3813	18.5332	18.0583
+	5.59236	-2.20474	0.216923	High	Q15517	Corneodesmosin OS=Homo sapiens OX=9606	CDSN	+	Cluster -801	17.5219	0	8.696	6	3	63	3	529	51.5	8.35		20.0175	19.9847	20.0947	17.7889	17.7746	17.9192	17.0977	16.1186	16.9398	17.1644	16.8015	16.9432	16.293	16.4331	16.3942	17.0305	17.0639	17.1649	16.7992	16.6949	16.6158	15.9384	15.7103	15.543
+	5.03733	-2.20857	0.216349	High	P10619	Lysosomal protective protein OS=Homo sapiens OX=9606	CTSA	+	Cluster -801	2.50282	0.00137463	4.517	3	1	3	1	480	54.4	6.61		15.6613	15.5606	15.5974	13.3166	13.3355	13.5416	13.5909	12.6406	11.9344	13.4063	13.441	13.5053	13.0271	12.9119	12.5865	11.1958	13.5752	12.5279	13.3962	12.9597	13.6907	13.5813	13.6537	12.7804
+	3.35228	-2.22575	0.213788	High	Q16563	Synaptophysin-like protein 1 OS=Homo sapiens OX=9606	SYPL1	+	Cluster -801	6.16146	4.15225e-05	3.062	4	1	20	1	259	28.5	8.43		16.5276	16.58	16.6571	13.9814	14.4169	14.6891	14.7322	13.8647	15.0805	14.0444	14.3958	13.6417	14.1775	13.954	13.9661	14.4807	14.0754	14.2634	14.1934	14.3752	14.2104	13.6067	14.0851	13.891
+	2.35401	-2.23408	0.212557	High	Q96QA5	Gasdermin-A OS=Homo sapiens OX=9606	GSDMA	+	Cluster -801	4.35879	7.11111e-05	16.422	11	4	49	4	445	49.3	5.29		19.2916	19.1072	19.2391	17.4226	17.295	16.2181	17.4506	15.2904	15.8771	17.0216	16.8995	15.7638	15.2399	16.9945	15.5088	15.4124	15.6602	15.3414	15.0925	15.0319	15.4381	15.074	15.0192	15.6076
+	6.93954	-2.23712	0.21211	High	Q5T749	Keratinocyte proline-rich protein OS=Homo sapiens OX=9606	KPRP	+	Cluster -801	17.2978	0	112.113	35	12	500	12	579	64.1	8.27	Met-loss+Acetyl [N-Term]	23.1052	23.118	23.1866	20.901	20.9113	20.8861	20.3196	19.5476	20.213	20.4912	20.1824	20.2772	19.8087	19.9246	19.9229	20.5101	20.4468	20.5358	19.7545	19.858	19.9843	19.6374	19.6168	19.2403
+	5.15357	-2.28193	0.205622	High	P14923	Junction plakoglobin OS=Homo sapiens OX=9606	JUP	+	Cluster -801	16.3421	0	148	39	21	721	21	745	81.7	6.14		23.2353	23.4487	23.3844	20.9934	21.1056	21.1236	20.4128	19.7977	20.3081	20.3504	19.925	19.9302	19.6668	19.8709	19.7545	20.1495	20.1338	20.1218	19.9856	19.9986	20.0635	19.4365	19.4472	19.2336
+	1.69596	-2.3155	0.200893	High	Q99623	Prohibitin-2 OS=Homo sapiens OX=9606	PHB2			NaN	NaN	12.424	16	4	35	4	299	33.3	9.83		18.0171	17.7522	17.6725	16.0275	14.2809	16.1868	16.1252	13.7328	15.0553	15.2854	15.3728	15.0973	15.8799	15.9111	16.0346	15.8872	16.5636	15.7613	15.4053	17.2879	16.2903	16.0779	16.093	15.3399
+	2.75051	-2.32157	0.20005	High	O43242	26S proteasome non-ATPase regulatory subunit 3 OS=Homo sapiens OX=9606	PSMD3	+	Cluster -803	3.20091	0.00042	2.967	2	1	4	1	534	60.9	8.44		15.0278	14.1447	14.8797	12.0919	12.3696	12.626	13.0227	13.0785	12.9613	14.7205	14.8806	14.9345	15.0735	14.8779	15.0146	14.4712	14.516	14.9996	15.2016	15.0734	15.095	14.903	15.04	11.8384
+	3.80004	-2.34291	0.197113	High	P01857	Immunoglobulin heavy constant gamma 1 OS=Homo sapiens OX=9606	IGHG1	+	Cluster -801	13.1875	0	123.893	52	12	1359	5	330	36.1	8.19		20.1243	20.4158	20.6895	18.0045	18.1554	18.041	17.3457	16.6187	17.3124	17.695	17.7178	17.4899	16.7899	17.0724	16.9648	17.7364	17.6323	17.6679	17.0511	17.066	17.0467	17.2893	17.2474	16.8814
+	3.49775	-2.36336	0.194338	High	Q9NZV5	Selenoprotein N OS=Homo sapiens OX=9606	SELENON	+	Cluster -801	6.5003	4.6875e-05	7.079	4	2	11	2	590	65.8	5.48		16.6853	17.0717	16.8426	14.2099	14.8006	14.499	14.3783	13.7474	14.2826	12.9136	11.9994	12.2788	13.9503	12.5856	13.6393	13.4392	13.1212	14.0881	13.6117	12.786	12.4592	13.7768	13.817	13.6825
+	3.13509	-2.36786	0.193733	High	Q9BYJ1	Hydroperoxide isomerase ALOXE3 OS=Homo sapiens OX=9606	ALOXE3	+	Cluster -801	3.89087	0.000142012	2.681	2	1	4	1	711	80.5	6.96		15.7285	15.9985	16.4987	13.7086	13.9073	13.5062	13.574	12.7358	12.8461	12.9273	13.5601	12.6384	12.8591	13.2379	13.2256	12.9192	12.8497	13.3505	12.9953	14.1151	12.1256	12.7695	12.2995	12.8718
+	2.04393	-2.37022	0.193416	High	O00299	Chloride intracellular channel protein 1 OS=Homo sapiens OX=9606	CLIC1			NaN	NaN	5.816	12	2	12	2	241	26.9	5.17		15.5522	15.6623	15.6424	13.2741	12.3722	14.0999	12.7171	13.832	12.8991	12.8692	12.2734	14.3952	13.0172	14.3468	14.5371	14.5749	14.5027	14.2154	14.425	14.751	14.6128	14.3546	14.1776	12.5233
+	1.81909	-2.41089	0.188039	High	Q8WWI1	LIM domain only protein 7 OS=Homo sapiens OX=9606	LMO7	+	Cluster -803	2.78398	0.0007625	4.424	1	2	12	2	1683	192.6	8.09		15.0603	14.091	15.2918	13.1686	11.5676	12.4742	15.1959	14.4907	13.9547	13.7977	14.0194	13.3408	13.5583	13.3367	13.7481	13.2718	13.3336	13.4676	15.0065	13.3774	15.2106	15.0676	15.1338	14.9479
+	3.81314	-2.42479	0.186237	High	P27797	Calreticulin OS=Homo sapiens OX=9606	CALR	+	Cluster -801	9.29063	0	28.105	23	5	92	5	417	48.1	4.44		18.786	18.7484	18.7639	16.0034	16.4408	16.5798	16.6896	16.1864	16.6953	16.4356	15.8616	15.8362	17.0933	17.0313	16.9002	17.6182	17.5497	17.5159	17.1579	17.1005	17.0285	17.1073	17.0889	16.9906
+	6.07309	-2.44219	0.184004	High	P01040	Cystatin-A OS=Homo sapiens OX=9606	CSTA	+	Cluster -801	16.8096	0	13.964	40	3	188	3	98	11	5.5		20.8935	20.9555	21.0325	18.4784	18.5123	18.5643	18.7511	17.9477	18.6743	18.2346	17.8395	17.7384	19.2304	19.2885	19.2702	18.8965	18.8081	18.9041	18.2523	18.2423	18.2145	18.0664	18.0225	17.5528
+	3.27996	-2.44539	0.183597	High	P59665	Neutrophil defensin 1 OS=Homo sapiens OX=9606	DEFA1B	+	Cluster -801	4.95564	5.19481e-05	4.053	10	1	76	1	94	10.2	6.99		15.6554	15.7032	15.6721	12.9502	13.0356	13.7087	13.8467	12.3575	13.8391	13.1785	12.9157	13.3313	13.5913	13.6754	13.4318	13.6088	13.3887	12.9238	12.7868	12.4923	13.3024	12.8834	13.2015	13.1649
+	3.25167	-2.47758	0.179545	High	P61626	Lysozyme C OS=Homo sapiens OX=9606	LYZ	+	Cluster -801	8.96956	0	6.791	8	1	135	1	148	16.5	9.16		18.8263	19.567	19.5571	16.8217	16.7918	16.9042	17.3255	16.5722	17.1437	16.5068	15.8352	16.4798	15.9459	16.2055	16.133	16.3924	16.5015	16.2801	15.9321	16.0274	15.9582	16.1913	16.1708	16.1194
+	3.88945	-2.51432	0.175031	High	P01834	Immunoglobulin kappa constant OS=Homo sapiens OX=9606	IGKC	+	Cluster -801	2.37758	0.00186744	20.25	50	3	100	3	107	11.8	6.52		17.1903	17.4903	17.4473	15.0597	14.5793	14.9459	14.668	12.8873	14.2758	12.1325	14.1297	12.2222	14.6645	14.5137	14.1249	14.5304	12.3785	11.5351	10.8532	14.0541	14.5238	15.2971	15.153	14.2784
+	3.7223	-2.5338	0.172683	High	P08758	Annexin A5 OS=Homo sapiens OX=9606	ANXA5	+	Cluster -801	4.81223	4.93827e-05	14.52	17	4	143	4	320	35.9	5.05		19.482	19.555	19.5158	17.1122	16.6087	17.2304	17.6367	16.932	18.5899	16.199	15.3677	16.439	18.1401	18.2931	18.2743	18.1523	18.0771	17.6151	17.0306	16.9007	17.1949	16.9361	16.8963	17.7611
+	3.72664	-2.62179	0.162466	High	O14732	Inositol monophosphatase 2 OS=Homo sapiens OX=9606	IMPA2	+	Cluster -801	2.65362	0.001	2.712	3	1	5	1	288	31.3	6.61		15.9031	15.4881	16.0395	13.302	12.9724	13.291	12.5885	12.1718	13.0378	13.1247	12.6732	13.0507	12.9666	11.5974	14.4109	12.8478	12.8453	12.9388	12.8392	13.2528	13.0845	13.505	12.5303	11.5372
+	2.75461	-2.65286	0.159005	High	P08133	Annexin A6 OS=Homo sapiens OX=9606	ANXA6	+	Cluster -801	3.38858	0.000346021	4.916	3	2	19	2	673	75.8	5.6		16.3604	16.7212	16.8907	13.4099	14.0903	14.5135	14.9836	11.9269	12.255	14.8233	14.2245	14.3156	15.1639	15.372	15.4778	15.227	15.1296	15.2973	15.2284	15.1359	15.1183	15.2738	15.0386	14.8665
+	4.87339	-2.67382	0.156711	High	Q16610	Extracellular matrix protein 1 OS=Homo sapiens OX=9606	ECM1	+	Cluster -801	5.04901	5.33333e-05	19.533	12	5	56	5	540	60.6	6.71		19.0572	19.0214	19.1798	16.2314	16.5301	16.4754	15.9057	15.6457	15.854	16.1178	15.896	15.9588	14.8421	15.309	16.0051	16.0665	16.5663	15.7985	15.9141	15.8306	16.2164	15.9137	14.1903	15.6366
+	3.98246	-2.68018	0.156022	High	O43852	Calumenin OS=Homo sapiens OX=9606	CALU	+	Cluster -801	5.04188	5.30504e-05	5.182	7	2	35	2	315	37.1	4.64		16.9654	17.3655	17.3686	14.3301	14.6646	14.6643	15.0762	15.3518	15.2672	14.8949	13.9984	14.8619	15.4658	14.9468	15.5737	15.9645	15.9837	16.1702	14.9502	14.783	14.8151	14.9674	14.7678	15.0589
+	2.04441	-2.72645	0.151097	High	Q9GZZ8	Extracellular glycoprotein lacritin OS=Homo sapiens OX=9606	LACRT	+	Cluster -801	3.00411	0.000503226	4.566	9	1	8	1	138	14.2	5.5		16.095	15.9005	15.8694	13.8394	12.0881	13.7581	12.5002	11.9029	13.6638	11.8906	13.213	11.3482	12.6279	13.3018	11.7402	12.4765	12.4522	12.5268	12.8724	12.1722	13.2777	13.1066	12.4138	12.2835
+	4.9789	-2.74308	0.149366	High	Q13867	Bleomycin hydrolase OS=Homo sapiens OX=9606	BLMH	+	Cluster -801	12.1452	0	20.942	14	5	144	5	455	52.5	6.27		20.4544	20.3649	20.1877	17.5303	17.7168	17.5308	17.5524	16.8167	17.5059	17.3777	17.263	17.1011	16.6939	16.9895	16.8783	17.5014	17.1945	17.4666	16.9861	17.0539	17.2728	16.7499	16.5974	16.7487
+	2.20594	-2.78607	0.144981	High	P02787	Serotransferrin OS=Homo sapiens OX=9606	TF			NaN	NaN	69.276	24	16	366	16	698	77	7.12		15.9579	15.3009	14.489	12.9955	12.4893	11.9048	14.9653	13.6775	13.7187	12.9542	13.9717	12.68	13.5242	13.0735	14.2827	13.2211	12.2567	14.4781	12.4513	12.056	14.5156	14.4855	14.6558	13.175
+	4.6705	-2.79385	0.144201	High	P31944	Caspase-14 OS=Homo sapiens OX=9606	CASP14	+	Cluster -801	8.18569	0	51.988	43	10	324	10	242	27.7	5.58		21.455	21.6826	21.2987	18.5957	18.6947	18.7644	18.9003	18.4389	18.7889	19.0557	18.3576	18.3918	18.2441	18.6414	17.9112	18.9399	18.6061	18.4152	17.8815	17.8888	18.3959	17.8638	18.0773	17.9175
+	1.49994	-2.80516	0.143075	High	P17931	Galectin-3 OS=Homo sapiens OX=9606	LGALS3			NaN	NaN	11.399	14	3	10	3	250	26.1	8.56		14.9507	14.9078	15.0197	13.8752	11.1446	11.443	11.6534	13.4922	12.6502	13.575	12.4117	12.5228	11.4438	12.7189	12.1314	12.4879	13.9691	11.7038	13.4946	12.2706	11.9866	13.1535	11.0908	10.6349
+	2.93314	-2.82986	0.140646	High	Q8TDL5	BPI fold-containing family B member 1 OS=Homo sapiens OX=9606	BPIFB1	+	Cluster -801	2.06565	0.00361134	5.271	6	2	5	2	484	52.4	7.23		16.0557	16.5499	15.8197	13.1691	12.9394	13.8272	13.9472	12.3126	11.1772	13.8192	12.7716	13.5506	12.9941	13.1222	13.6841	12.7388	14.2147	14.4011	14.2559	12.9495	13.4631	12.4044	12.4067	13.4727
	0.835217	-2.86657	0.137113	High	P25685	DnaJ homolog subfamily B member 1 OS=Homo sapiens OX=9606	DNAJB1			NaN	NaN	11.685	9	3	66	2	340	38	8.63		14.1226	19.2238	15.2027	12.8014	13.9965	13.1514	14.2998	12.9881	12.5482	13.8325	13.0609	13.3804	13.714	13.7632	14.1054	13.8543	13.7622	13.9546	13.9383	14.0128	14.3534	13.9665	13.9076	13.6469
+	1.25917	-2.90498	0.13351	High	Q13509	Tubulin beta-3 chain OS=Homo sapiens OX=9606	TUBB3			NaN	NaN	104.757	35	12	2252	2	450	50.4	4.93		13.1712	16.2664	16.2601	11.7985	12.2455	12.9389	16.3518	15.3306	15.7013	14.9752	12.5522	13.4982	12.0544	16.3716	13.6133	14.7932	12.3214	14.5288	15.2285	15.0424	13.79	15.0673	15.4143	14.6855
+	2.899	-3.02785	0.12261	High	Q10713	Mitochondrial-processing peptidase subunit alpha OS=Homo sapiens OX=9606	PMPCA	+	Cluster -801	1.83937	0.00620335	2.738	2	1	8	1	525	58.2	6.92		14.989	15.2285	15.678	12.6173	11.6429	12.5518	12.6974	12.3215	13.549	13.5656	12.1206	12.7835	13.4064	12.5951	13.4583	12.4815	13.1602	13.3062	12.6349	13.8233	14.2552	12.5307	13.8983	12.0657
+	5.07845	-3.03172	0.122282	High	P61106	Ras-related protein Rab-14 OS=Homo sapiens OX=9606	RAB14	+	Cluster -801	12.6425	0	21.774	36	5	238	4	215	23.9	6.21		20.7753	21.0034	20.9848	17.7407	17.9604	17.9673	17.8771	17.3863	18.0262	17.8847	17.6801	17.4094	17.8377	18.0327	17.9752	17.3175	17.6019	17.5331	17.9587	17.9514	18.0323	18.0756	18.2463	17.6673
+	3.98461	-3.03312	0.122163	High	P01037	Cystatin-SN OS=Homo sapiens OX=9606	CST1	+	Cluster -801	4.23357	8.45666e-05	9.208	21	2	16	1	141	16.4	7.21		15.9795	16.1975	16.0435	12.933	12.7857	13.4024	12.709	11.618	13.4146	12.5837	12.9298	12.0354	12.1785	14.0156	12.8735	12.5	12.8524	12.3227	12.6783	13.2077	13.6753	12.5204	12.5894	12.9877
+	2.415	-3.05216	0.120561	High	Q9UI42	Carboxypeptidase A4 OS=Homo sapiens OX=9606	CPA4	+	Cluster -801	1.94348	0.00468497	6.954	6	2	13	2	421	47.3	6.7		16.6964	15.6497	15.3556	12.5778	13.4535	12.5139	12.708	13.4061	12.3309	12.7999	13.2205	12.8932	12.9236	11.1907	12.1066	12.0156	13.0764	12.6359	13.896	13.4735	13.2892	12.924	14.7523	11.5701
+	3.08634	-3.08636	0.117737	High	P09493	Tropomyosin alpha-1 chain OS=Homo sapiens OX=9606	TPM1	+	Cluster -801	4.53878	6.51163e-05	12.837	11	3	182	1	284	32.7	4.74		16.1519	15.6507	15.843	13.2368	12.204	12.9456	15.0699	13.8192	14.8315	13.5839	13.0886	13.2778	14.2381	14.1797	14.4141	14.4376	14.5324	14.5535	14.1074	14.3357	14.0627	14.196	14.4393	12.6537
+	5.09398	-3.08716	0.117671	High	Q13510	Acid ceramidase OS=Homo sapiens OX=9606	ASAH1	+	Cluster -801	7.48483	3.94089e-05	5.829	5	2	11	2	395	44.6	7.62		17.4457	17.5713	17.5812	14.538	14.5447	14.2539	14.7715	14.701	14.5683	14.8159	14.7283	14.8635	14.5492	14.5328	14.7595	14.5309	14.6833	14.7984	14.5794	14.8383	15.0632	14.7432	15.0831	14.4099
+	3.6893	-3.12359	0.114738	High	P25311	Zinc-alpha-2-glycoprotein OS=Homo sapiens OX=9606	AZGP1	+	Cluster -801	9.90384	0	30.334	24	6	163	6	298	34.2	6.05		20.3927	19.9747	20.0011	16.6065	17.2573	17.1339	17.0493	16.0243	16.8361	17.1611	16.8789	17.2079	17.1809	17.6938	17.2562	17.8989	17.7259	17.7505	16.8638	16.9722	16.923	16.7901	16.6232	16.2766
+	2.48475	-3.12803	0.114385	High	Q6P4A8	Phospholipase B-like 1 OS=Homo sapiens OX=9606	PLBD1	+	Cluster -801	3.62354	0.000205505	5.984	4	2	7	2	553	63.2	9.06		16.1716	17.0647	16.8484	13.5153	12.8685	14.3167	13.7491	13.1846	13.1687	13.1044	14.3142	12.6547	12.8995	12.8438	11.5422	13.257	13.5003	13.3493	11.3512	11.487	13.6613	13.3622	13.5013	12.5061
+	2.54196	-3.13686	0.113687	High	P01860	Immunoglobulin heavy constant gamma 3 OS=Homo sapiens OX=9606	IGHG3	+	Cluster -801	4.14362	0.000106996	63.251	34	10	929	3	377	41.3	7.9		16.3847	15.9115	15.0503	12.7674	13.0611	12.1075	14.0216	12.4421	13.3062	12.1576	12.1228	11.8421	13.5264	13.4678	12.8322	14.3772	14.2787	14.4676	13.0773	12.6476	12.1265	13.1991	12.1409	13.7504
+	4.35909	-3.16489	0.1115	High	P12273	Prolactin-inducible protein OS=Homo sapiens OX=9606	PIP	+	Cluster -801	13.1605	0	3.4	5	1	71	1	146	16.6	8.05		19.1407	19.4272	19.4387	15.9078	16.2622	16.3418	16.7709	16.1473	16.9606	16.4092	16.0086	16.092	16.4431	16.5386	16.5805	16.956	16.8204	17.0288	16.4336	16.4536	16.3938	16.2072	16.284	16.0067
+	4.8094	-3.16631	0.11139	High	MB0010	Proteine ABCD ctl - GFP (echantillon 10)	ABCD	+	Cluster -801	6.83289	5.12821e-05	386.814	72	32	12159	8	367	40.5	8.7		19.5221	19.6964	19.812	16.3318	16.6578	16.542	16.7649	16.7107	16.9445	16.584	16.3195	16.1131	16.3254	17.1134	16.6334	16.7342	16.1825	16.6855	16.9185	16.8825	16.6001	15.7085	15.8539	16.3936
+	3.91479	-3.18525	0.109937	High	P69905	Hemoglobin subunit alpha OS=Homo sapiens OX=9606	HBA2	+	Cluster -801	6.99867	5.28634e-05	17.369	28	3	31	3	142	15.2	8.68		17.2016	17.2487	17.1939	14.0365	14.3977	13.6541	15.3424	14.2185	15.311	13.9625	14.5167	14.5657	14.7811	14.5585	14.3237	15.5954	15.9678	15.8687	14.1445	14.4071	14.664	14.4981	14.628	14.3369
+	3.25698	-3.28654	0.102483	High	O75635	Serpin B7 OS=Homo sapiens OX=9606	SERPINB7	+	Cluster -801	3.65435	0.000200371	14.573	12	4	33	4	380	42.9	6.8		16.9247	17.1089	16.8669	13.9136	14.0781	13.0492	13.8109	12.2117	14.8499	13.0005	11.6075	13.5233	13.0613	12.1653	12.9889	14.1318	11.7584	12.3097	13.174	12.9364	13.189	12.2134	13.0519	11.5425
+	4.38796	-3.29926	0.101584	High	Q9H1E1	Ribonuclease 7 OS=Homo sapiens OX=9606	RNASE7	+	Cluster -801	8.43789	0	7.013	15	2	31	2	156	17.4	9.69		17.6123	18.0571	18.0771	14.4699	14.6588	14.72	14.7906	14.0834	14.2782	15.0031	13.966	14.7205	14.6656	14.6922	14.7781	15.0596	15.2722	15.3037	14.7403	14.8948	14.9832	13.9637	14.0222	14.2083
+	3.78039	-3.33682	0.098973	High	P62081	40S ribosomal protein S7 OS=Homo sapiens OX=9606	RPS7	+	Cluster -801	7.17897	5.42986e-05	22.272	27	2	26	2	194	22.1	10.1		23.6658	24.0936	24.3606	20.4808	20.6773	20.9514	20.8629	20.2935	20.8191	21.0456	20.686	20.8634	20.5543	20.7841	20.9047	21.0637	21.2134	21.5599	20.7301	21.2557	21.0965	20.2871	20.7227	21.0994
+	4.59426	-3.34506	0.0984095	High	Q15828	Cystatin-M OS=Homo sapiens OX=9606	CST6	+	Cluster -801	8.27022	0	6.392	14	2	29	2	149	16.5	8.09		17.6739	17.2804	17.2094	14.0883	14.094	13.9462	14.7931	13.8453	14.4423	14.6424	13.4213	14.0183	13.6311	14.2428	14.0186	14.9179	15.0138	15.288	13.8456	13.814	13.424	13.5755	13.9262	13.6824
+	3.14121	-3.38096	0.0959909	High	P01591	Immunoglobulin J chain OS=Homo sapiens OX=9606	JCHAIN	+	Cluster -801	3.66493	0.000201117	5.316	8	1	10	1	159	18.1	5.24		16.1612	16.6339	16.2662	12.8613	12.4633	13.5939	14.0802	14.4234	14.3442	13.5723	13.9762	13.5907	13.3801	13.8884	13.5966	12.6386	13.7673	13.6985	13.5565	13.0599	13.2675	14.596	14.2825	12.6298
+	2.25646	-3.49645	0.0886061	High	P01876	Immunoglobulin heavy constant alpha 1 OS=Homo sapiens OX=9606	IGHA1	+	Cluster -801	4.03902	0.000121951	18.173	18	4	79	3	353	37.6	6.51		16.7454	17.6094	17.0034	13.4235	12.7165	14.7288	14.668	11.9144	12.1656	13.2176	13.6339	13.1161	12.0967	12.8838	12.9897	13.9321	12.9604	13.3834	12.9619	13.3196	13.1659	13.8852	13.8163	13.2294
+	2.26023	-3.62779	0.080896	High	Q6UWP8	Suprabasin OS=Homo sapiens OX=9606	SBSN	+	Cluster -801	4.75252	4.914e-05	33.976	16	5	51	5	590	60.5	7.01		17.3145	16.9953	16.8678	12.1422	13.9088	14.2432	13.6603	13.1345	14.5163	13.6024	12.7243	12.8244	13.2867	13.1382	11.5188	14.1926	14.3179	13.6445	13.0968	13.1105	12.776	12.81	12.5685	12.6908
+	1.94736	-3.66096	0.0790573	High	A8K2U0	Alpha-2-macroglobulin-like protein 1 OS=Homo sapiens OX=9606	A2ML1	+	Cluster -801	4.67377	4.81928e-05	48.429	11	13	78	13	1454	161	5.73		18.8904	18.8401	18.5837	16.7457	14.2463	14.3393	14.3612	12.5158	12.8487	13.255	13.7647	12.8331	15.0482	14.8985	13.9099	14.5035	14.457	14.689	14.9683	15.217	15.0496	14.4601	12.8786	14.3399
+	1.55999	-3.68044	0.077997	High	Q86SG5	Protein S100-A7A OS=Homo sapiens OX=9606	S100A7A	+	Cluster -801	2.6079	0.00111614	41.069	50	6	146	2	101	11.3	7.44		17.0682	17.0313	16.9955	15.0363	13.6945	11.3229	13.2237	11.8621	11.9606	12.1198	13.749	14.6331	12.1756	11.7018	12.1022	11.961	12.1788	13.9534	13.7709	12.8077	11.7828	11.8592	12.8697	11.9435
+	3.6322	-3.74306	0.0746838	High	P01833	Polymeric immunoglobulin receptor OS=Homo sapiens OX=9606	PIGR	+	Cluster -801	6.34557	4.41176e-05	5.89	3	2	8	2	764	83.2	5.74		17.0536	17.0055	17.0769	13.1666	12.8676	13.8726	12.9993	12.3302	13.8989	11.7367	13.1043	12.5448	13.1981	12.3144	12.5045	14.2495	14.0385	14.5516	14.0813	14.1218	14.2429	13.2367	12.7596	13.3755
+	2.81774	-3.76265	0.0736765	High	P09601	Heme oxygenase 1 OS=Homo sapiens OX=9606	HMOX1	+	Cluster -801	5.20254	4.51977e-05	12.12	12	3	13	3	288	32.8	8.25		16.6491	16.9394	16.4405	12.8537	12.1383	13.749	12.0629	12.0562	14.3225	11.0664	12.2976	12.0107	12.6521	13.621	13.7017	15.6282	15.6046	15.9627	13.1637	12.5708	13.6157	11.9148	12.2831	12.8706
+	2.88466	-3.7839	0.0725993	High	P03973	Antileukoproteinase OS=Homo sapiens OX=9606	SLPI	+	Cluster -801	4.33671	7.03297e-05	3.832	9	1	16	1	132	14.3	8.75		16.5945	16.1043	16.18	12.0972	13.3998	12.0301	13.0366	11.9006	13.166	12.4432	13.0164	12.0628	12.93	13.617	13.3954	12.9942	11.872	11.6712	11.7861	13.5127	12.5212	12.5163	12.5317	11.087
+	6.5502	-3.79315	0.0721352	High	O43809	Cleavage and polyadenylation specificity factor subunit 5 OS=Homo sapiens OX=9606	NUDT21	+	Cluster -801	19.1167	0	21.029	15	4	157	4	227	26.2	8.82		22.5142	22.5063	22.543	18.6759	18.6707	18.8374	18.1109	17.4801	17.9903	17.3235	17.0044	17.2437	17.0418	17.0183	16.9229	18.2208	18.1471	18.1245	16.9363	17.0535	17.0424	17.2281	17.232	16.9414
+	5.21254	-3.91798	0.0661561	High	P31025	Lipocalin-1 OS=Homo sapiens OX=9606	LCN1	+	Cluster -801	11.5101	0	12.262	22	3	43	3	176	19.2	5.58		19.6548	19.5533	19.8518	15.9212	15.7712	15.6135	16.4392	15.7594	16.4683	16.0512	15.8502	16.1345	16.0763	16.1756	16.1678	16.229	16.0527	16.0507	16.2216	16.0818	16.1532	16.3443	16.2736	16.5317
+	3.89944	-3.95501	0.0644799	High	P01036	Cystatin-S OS=Homo sapiens OX=9606	CST4	+	Cluster -801	7.28717	5.66038e-05	9.561	21	2	15	1	141	16.2	5.02		17.0684	17.3266	17.4625	13.7201	13.3906	12.8818	13.8899	13.3197	13.691	13.6986	13.4742	14.2187	13.9535	13.9727	13.7435	13.0743	14.0006	13.7946	14.1526	13.9608	13.9311	14.1314	14.245	13.9178
+	4.9836	-3.96608	0.0639867	High	P02788	Lactotransferrin OS=Homo sapiens OX=9606	LTF	+	Cluster -801	12.7118	0	61.993	28	15	205	15	710	78.1	8.12		21.2312	21.0416	21.2345	16.9774	17.2062	17.4254	17.8822	17.0401	17.7105	17.48	17.4827	17.1945	17.7021	17.9886	17.9525	17.7438	17.5529	17.4248	17.745	18.0806	18.1459	18.2727	18.3631	18.0374
+	5.90471	-4.25961	0.052207	High	Q16630	Cleavage and polyadenylation specificity factor subunit 6 OS=Homo sapiens OX=9606	CPSF6	+	Cluster -801	17.2905	0	56.167	15	7	442	7	551	59.2	7.15		24.3054	24.4732	24.5067	20.0882	20.1178	20.3004	20.4728	19.5036	20.1438	19.3418	19.2796	19.0453	18.7609	18.9501	18.9474	21.5275	21.437	21.525	19.1174	18.9887	18.9763	19.5258	19.3525	18.6775
+	4.12245	-4.65118	0.0397974	High	P0DUB6	Alpha-amylase 1A OS=Homo sapiens OX=9606	AMY1A	+	Cluster -800	10.9538	0	14.711	10	4	15	4	511	57.7	6.93		17.5169	17.5309	17.65	12.5121	12.7907	13.4415	12.1734	11.0098	12.8208	12.3155	13.001	13.3857	13.565	12.9607	12.2245	19.9763	20.0206	19.9617	13.3042	12.7522	13.2265	12.1098	13.3728	12.8876
+	2.85679	-4.90226	0.0334405	High	Q9HCY8	Protein S100-A14 OS=Homo sapiens OX=9606	S100A14	+	Cluster -801	5.42287	3.57143e-05	7.503	21	2	28	2	104	11.7	5.24		17.4173	17.95	18.3389	14.1025	12.622	12.275	13.0772	11.4685	13.8238	13.6958	12.4845	13.5549	13.063	12.09	13.2144	14.3009	13.2172	13.7005	12.581	13.5537	12.5033	13.3251	13.3832	12.6508
+	4.18466	-4.94253	0.0325199	High	Q9UK41	Vacuolar protein sorting-associated protein 28 homolog OS=Homo sapiens OX=9606	VPS28	+	Cluster -801	4.49507	6.43678e-05	4.323	11	1	15	1	221	25.4	5.54	Acetyl [N-Term]	18.3795	18.5209	18.6501	13.9755	13.0488	13.6986	12.3592	12.5254	14.5252	13.1782	13.7686	13.8953	13.1925	14.4564	12.2212	13.3456	12.7345	13.3823	13.9279	14.5425	12.9905	14.0446	12.2056	13.9896
+	4.14647	-5.39981	0.0236862	High	P19013	Keratin, type II cytoskeletal 4 OS=Homo sapiens OX=9606	KRT4	+	Cluster -801	10.7013	0	80.248	37	18	1344	12	520	56.1	6.61		20.7464	20.6448	20.6961	15.9166	15.1027	14.8686	16.0794	15.8984	15.9905	17.553	17.3174	17.261	15.3681	15.0341	14.7438	14.9488	14.4172	15.0559	20.339	20.2974	20.3808	14.5117	14.0654	15.4205
+	2.94172	-5.69297	0.0193306	High	P02814	Submaxillary gland androgen-regulated protein 3B OS=Homo sapiens OX=9606	SMR3B	+	Cluster -801	6.59055	4.8e-05	9.318	39	1	4	1	79	8.2	9.57		18.5499	18.4323	18.5577	13.7911	11.5012	13.1687	13.0706	12.2701	12.7663	12.3384	13.2557	13.7301	13.8704	12.8342	12.4669	12.9018	12.8362	12.6332	13.6829	12.9679	13.1371	13.4142	13.6759	13.308
+	3.71386	-5.91923	0.0165247	High	Q13310	Polyadenylate-binding protein 4 OS=Homo sapiens OX=9606	PABPC4	+	Cluster -801	10.9061	0	15.651	9	5	58	2	644	70.7	9.26		20.4633	20.2495	20.5308	14.9444	13.6111	14.9304	15.5611	15.1429	15.3366	15.3173	14.8167	14.8811	15.2578	15.3036	15.2731	16.8612	16.8759	17.014	16.2342	16.359	16.18	15.206	15.2475	15.1139

## Sheet: Ratio uGIPpolyG (Ex2) vs GFP
Significant	-LOG(P-value)	Difference log2	Ratio GIP2/GFP	Protein FDR Confidence: Combined	Accession	Description	Gene Name	ANOVA Significant	Cluster	-Log ANOVA P value	ANOVA q-value	Sum PEP Score	Coverage [%]	# Peptides	# PSMs	# Unique Peptides	# AAs	MW [kDa]	calc. pI	Modifications	XIC S01rep1	XIC S01rep2	XIC S01rep3	XIC S02rep1	XIC S02rep2	XIC S02rep3	XIC S03rep1	XIC S03rep2	XIC S03rep3	XIC S04rep1	XIC S04rep2	XIC S04rep3	XIC S05rep1	XIC S05rep2	XIC S05rep3	XIC S06rep1	XIC S06rep2	XIC S06rep3	XIC S07rep1	XIC S07rep2	XIC S07rep3	XIC S08rep1	XIC S08rep2	XIC S08rep3
	0.939046	9.35476	654.732	High	Q13042	Cell division cycle protein 16 homolog OS=Homo sapiens OX=9606	CDC16	+	Cluster -803	2.27815	0.00228491	27.549	14	8	43	8	620	71.6	5.85		13.2273	27.6932	14.3137	28.2909	27.7887	27.9276	27.8413	27.2785	28.1787	27.4692	26.9473	27.4368	27.5136	27.5776	27.3216	28.081	27.5484	27.7815	28.2379	27.8922	27.9186	27.7474	27.5111	27.7967
+	3.63678	3.99676	15.9641	High	P10644	cAMP-dependent protein kinase type I-alpha regulatory subunit OS=Homo sapiens OX=9606	PRKAR1A	+	Cluster -803	12.6629	0	4.146	3	1	20	1	381	43	5.35		13.5145	13.5115	12.8886	17.1634	17.1891	17.1552	17.6825	16.8568	17.3656	16.4705	16.107	16.7808	16.7118	16.9864	16.881	16.2399	16.4212	16.4944	16.8899	17.0788	17.0058	17.1087	17.236	16.7118
	1.64565	2.06442	4.18267	High	P62854	40S ribosomal protein S26 OS=Homo sapiens OX=9606	RPS26	+	Cluster -803	5.73514	3.77358e-05	6.882	23	2	29	2	115	13	11		15.074	15.2938	15.965	15.9635	17.2139	17.5843	18.3449	16.5979	17.5832	17.7893	17.6351	17.8038	18.0115	18.2598	18.2893	18.267	18.3986	18.4811	18.8335	19.0016	18.9039	18.5041	18.7012	16.5676
+	1.89706	1.99574	3.9882	High	O75367	Core histone macro-H2A.1 OS=Homo sapiens OX=9606	MACROH2A1	+	Cluster -800	4.30536	7.01754e-05	9.9	11	3	13	3	369	39.2	9.83		13.234	13.7528	12.4018	13.1987	14.735	15.2995	15.5375	14.6842	15.154	13.6782	13.3662	13.8149	14.4046	14.425	14.7229	15.0348	14.897	14.9751	14.3848	14.8563	14.843	15.1331	14.8965	14.7507
+	2.04623	1.97536	3.93228	High	Q13155	Aminoacyl tRNA synthase complex-interacting multifunctional protein 2 OS=Homo sapiens OX=9606	AIMP2	+	Cluster -803	5.58047	3.7037e-05	4.638	8	1	26	1	320	35.3	8.22		14.1613	12.8131	13.3644	14.3151	15.1247	14.9395	15.5682	15.1387	15.5579	15.2462	15.3544	15.3526	15.1355	15.392	15.4408	14.0608	15.0136	15.244	15.2421	15.441	15.7094	15.4957	15.4622	15.2303
+	2.78231	1.90844	3.75402	High	P63220	40S ribosomal protein S21 OS=Homo sapiens OX=9606	RPS21	+	Cluster -803	10.4825	0	15.593	40	3	110	3	83	9.1	8.5		16.846	16.4313	16.6584	18.8814	18.8778	18.7876	18.8511	18.118	18.6918	18.5055	17.4687	17.5136	18.8474	18.9849	18.9891	18.6607	18.546	18.5158	19.0383	18.9891	18.9711	18.9704	18.8619	18.3695
	0.662942	1.88461	3.69254	High	Q9H3H9	Transcription elongation factor A protein-like 2 OS=Homo sapiens OX=9606	TCEAL2			NaN	NaN	3.327	4	1	3	1	227	25.8	5.94		14.8614	11.0352	11.2141	12.581	12.8238	13.9699	14.7134	13.6279	14.4232	13.5791	13.3533	13.3061	12.9107	13.4501	13.8393	12.7139	12.7636	12.9318	13.8479	13.5574	13.4236	13.8734	13.6635	13.7552
	1.3617	1.85353	3.61384	High	P57721	Poly(rC)-binding protein 3 OS=Homo sapiens OX=9606	PCBP3	+	Cluster -803	2.81131	0.000727273	25.138	15	4	322	1	371	39.4	8.07		12.7022	12.6402	14.5387	12.0339	12.9956	14.7968	15.3309	14.8986	15.2121	14.873	14.3387	14.1589	14.6269	14.7676	14.7047	14.1048	13.7694	13.9508	14.7555	14.7939	14.7637	14.7668	14.8093	14.4814
+	3.19572	1.64388	3.12505	High	P08123	Collagen alpha-2(I) chain OS=Homo sapiens OX=9606	COL1A2	+	Cluster -803	2.27672	0.00228732	3.171	1	1	5	1	1366	129.2	8.95		12.7939	13.0114	12.5903	12.6411	14.8384	14.7949	14.672	14.3787	14.2764	14.1924	13.6067	13.6272	14.6889	14.8575	14.8133	15.4495	14.115	12.7101	14.7033	13.9522	14.8091	15.1719	14.7553	14.6214
	0.958367	1.64059	3.11793	High	O15145	Actin-related protein 2/3 complex subunit 3 OS=Homo sapiens OX=9606	ARPC3	+	Cluster -803	2.30101	0.00217045	9.315	12	2	36	2	178	20.5	8.59		15.7054	14.0924	13.9466	14.8728	15.2066	14.114	17.1869	16.265	15.2143	15.141	15.7224	15.985	16.0729	16.6202	16.4186	15.6494	14.6614	16.3677	16.6769	16.6308	15.4211	16.6862	16.5452	16.0502
	1.17349	1.42835	2.69138	High	P16403	Histone H1.2 OS=Homo sapiens OX=9606	H1-2	+	Cluster -800	3.51079	0.000272401	24.284	19	4	338	1	213	21.4	10.93	Met-loss+Acetyl [N-Term]	14.8408	14.534	13.4624	15.9187	15.8196	15.7072	16.1109	14.9254	16.0861	14.8015	14.3215	14.6957	15.0935	15.3647	14.9542	15.7143	15.5407	15.8215	15.9934	15.9183	16.0281	15.3328	15.096	12.9629
	0.815129	1.37876	2.60045	High	O60934	Nibrin OS=Homo sapiens OX=9606	NBN	+	Cluster -803	5.60132	3.71517e-05	4.082	4	2	11	2	754	84.9	6.9		13.8927	13.3838	12.401	14.8728	14.046	14.7357	15.5114	13.3465	14.9558	15.4346	15.3099	15.2329	15.4262	15.5447	15.6664	15.0916	14.9043	15.1806	15.6346	15.6196	15.7317	15.8619	15.9363	14.8247
	0.595762	1.32621	2.50742	High	P40261	Nicotinamide N-methyltransferase OS=Homo sapiens OX=9606	NNMT	+	Cluster -803	2.09925	0.00334783	4.252	4	1	45	1	264	29.6	5.74		12.5526	15.3977	15.6607	15.599	15.583	15.5429	15.8202	15.8483	15.9211	15.8559	15.1669	15.2075	15.8119	16.0391	15.9417	15.95	15.9313	15.9438	16.1942	16.2593	16.2793	16.2182	16.2249	15.9893
	0.845624	1.31566	2.48915	High	Q7L576	Cytoplasmic FMR1-interacting protein 1 OS=Homo sapiens OX=9606	CYFIP1	+	Cluster -803	2.36461	0.00190258	17.008	5	5	67	5	1253	145.1	6.9		16.6507	16.9179	17.3665	17.6132	17.3832	17.2179	19.18	16.9312	18.7709	16.7291	16.754	16.1904	17.0535	17.2305	17.214	15.7509	16.3752	15.2559	17.2361	16.8355	19.3918	17.222	17.3705	17.162
	0.993916	1.30163	2.46508	High	Q63ZY3	KN motif and ankyrin repeat domain-containing protein 2 OS=Homo sapiens OX=9606	KANK2	+	Cluster -803	5.10941	4.35967e-05	5.645	3	2	16	2	851	91.1	5.63		13.5367	14.9377	13.4672	15.3486	15.2052	15.4043	15.7401	14.5184	15.588	15.5327	14.8174	15.1267	15.3705	15.3451	15.2711	15.0766	15.1545	14.9638	15.4089	15.5292	15.2672	15.679	15.6039	15.0544
+	2.67414	1.29237	2.44929	High	P02452	Collagen alpha-1(I) chain OS=Homo sapiens OX=9606	COL1A1	+	Cluster -800	8.56717	0	6.25	2	3	9	3	1464	138.8	5.8		15.1201	15.4652	14.8454	14.0771	14.0064	14.0537	16.4561	16.3656	16.4861	14.0666	14.161	13.7733	14.6475	14.7935	14.8284	15.125	15.208	15.3105	14.6687	14.4236	14.5101	14.507	14.7699	14.3822
	0.513582	1.2881	2.44207	High	Q9BVG4	Protein PBDC1 OS=Homo sapiens OX=9606	PBDC1	+	Cluster -803	1.82491	0.00641026	7.724	9	2	44	2	233	26	4.79		14.2835	12.7716	16.4155	15.6773	16.0242	16.0858	16.1889	15.1854	15.9605	15.8333	15.7744	15.7766	15.7729	15.9698	15.8745	15.8224	15.4051	15.8471	15.9759	15.7214	16.0335	15.9504	15.8805	15.5283
	0.564033	1.27826	2.42547	High	A0A0B4J2D5	Putative glutamine amidotransferase-like class 1 domain-containing protein 3B, mitochondrial OS=Homo sapiens OX=9606	GATD3B			NaN	NaN	8.004	17	3	26	3	268	28.1	8.27		12.9426	15.5885	15.3545	14.6174	14.879	15.6431	15.2198	15.5162	16.9844	15.6733	14.224	14.4335	16.5751	15.1557	15.8373	14.2045	13.8379	15.1915	15.6468	15.8105	15.6894	15.1079	16.1474	16.1869
	0.620913	1.21461	2.32078	High	Q9P2J5	Leucine--tRNA ligase, cytoplasmic OS=Homo sapiens OX=9606	LARS1			NaN	NaN	2.625	1	1	6	1	1176	134.4	7.3		12.7206	13.5681	15.4027	15.0213	12.1126	14.9853	15.3978	14.3529	15.5844	14.781	14.7982	14.8901	15.1478	15.0783	14.6702	14.819	14.5497	14.2914	14.9579	15.0414	14.7828	14.7787	14.5755	14.7012
	0.321958	1.20587	2.30676	High	P38159	RNA-binding motif protein, X chromosome OS=Homo sapiens OX=9606	RBMX			NaN	NaN	4.494	6	2	12	2	391	42.3	10.05	Met-loss+Acetyl [N-Term]	16.2767	16.3702	12.5604	17.3421	17.0049	17.3317	17.5724	14.5779	16.6747	16.9784	16.8211	11.2809	17.0634	15.1601	15.6701	17.9217	17.9166	17.8546	17.0381	18.0497	17.4535	17.4115	17.3887	14.2246
	0.858478	1.19038	2.28214	High	P06730	Eukaryotic translation initiation factor 4E OS=Homo sapiens OX=9606	EIF4E	+	Cluster -803	3.74279	0.000166352	2.867	5	1	15	1	217	25.1	6.15		13.2804	14.0627	12.1248	14.3163	14.211	14.2365	14.7834	13.7369	14.5188	14.1853	14.1633	13.8137	14.4252	13.9726	14.2787	13.8756	13.9934	14.0809	14.4277	14.3384	14.3361	14.1004	13.9733	13.8116
	0.905047	1.12842	2.1862	High	P52597	Heterogeneous nuclear ribonucleoprotein F OS=Homo sapiens OX=9606	HNRNPF			NaN	NaN	6.967	6	2	28	1	415	45.6	5.58		13.5859	12.9029	13.2278	14.2232	14.625	15.0546	13.2836	14.7751	15.0432	12.0219	12.4797	12.8009	13.0186	12.6427	13.7958	11.1591	12.9418	13.307	13.3343	12.662	15.5611	12.4988	12.9471	14.7678
	1.26708	1.06973	2.09904	High	Q14203	Dynactin subunit 1 OS=Homo sapiens OX=9606	DCTN1	+	Cluster -800	1.68764	0.008995	6.171	2	2	4	2	1278	141.6	5.81		13.4124	13.5631	12.6554	13.9525	14.0672	15.4769	14.8045	13.8511	14.1844	12.2371	13.9759	11.7483	15.0745	14.7008	14.698	14.6583	14.4726	12.3701	15.3699	15.4125	15.1752	12.5636	15.1229	12.3975
	0.342244	1.0519	2.07325	High	P62891	60S ribosomal protein L39 OS=Homo sapiens OX=9606	RPL39			NaN	NaN	3.356	20	1	19	1	51	6.4	12.56		13.7041	13.699	17.2966	15.8847	15.9783	16.1238	16.5169	15.1159	16.2226	15.5297	14.9701	15.1922	15.5047	15.803	15.7801	16.0083	16.1711	16.2204	16.8167	16.6066	16.6469	15.3967	15.3877	14.7223
	0.709795	0.927896	1.9025	High	Q15366	Poly(rC)-binding protein 2 OS=Homo sapiens OX=9606	PCBP2	+	Cluster -803	4.18734	9.12863e-05	36.372	25	6	471	3	365	38.6	6.79		17.2474	16.9801	17.2161	17.8308	17.1332	17.21	18.6517	16.8939	18.6817	17.9429	17.7491	17.8482	17.7807	17.1752	17.8359	17.2143	17.3858	17.5462	18.1425	17.9207	18.1373	18.2065	18.1378	17.913
	1.48439	0.913417	1.8835	High	Q16527	Cysteine and glycine-rich protein 2 OS=Homo sapiens OX=9606	CSRP2	+	Cluster -803	7.39439	5.7971e-05	55.722	46	7	452	7	193	20.9	8.62		20.6362	20.7998	20.4186	20.0115	20.518	20.1593	21.9122	21.0273	21.6553	20.985	20.768	20.8984	21.1727	21.5723	21.6498	20.4464	20.3415	20.0118	21.0927	21.1591	21.3351	21.5417	21.4938	20.8352
	0.457051	0.86459	1.82082	High	P62140	Serine/threonine-protein phosphatase PP1-beta catalytic subunit OS=Homo sapiens OX=9606	PPP1CB	+	Cluster -803	2.33687	0.00202286	12.524	10	3	100	1	327	37.2	6.19		12.7844	15.1777	14.8818	15.4487	15.4236	15.6154	15.5962	14.5424	15.2991	15.2315	14.5427	14.8759	15.4422	15.4881	15.4297	14.9313	15.0761	15.2111	15.2087	15.5328	15.3478	15.0559	15.1102	14.9883
	0.829934	0.854753	1.80845	High	P25787	Proteasome subunit alpha type-2 OS=Homo sapiens OX=9606	PSMA2	+	Cluster -803	5.08573	5.42005e-05	4.266	11	2	12	2	234	25.9	7.43		16.9664	16.7539	16.7813	18.0745	18.096	18.0558	18.3491	16.7724	17.9444	17.8604	17.6888	17.7694	17.4644	17.5054	17.4964	17.6896	17.4719	17.4668	14.8867	16.4499	16.5457	16.7402	16.7648	15.53
	0.818214	0.846025	1.79754	High	Q9UM22	Mammalian ependymin-related protein 1 OS=Homo sapiens OX=9606	EPDR1	+	Cluster -800	3.87419	0.00015625	11.783	13	3	22	3	224	25.4	6.6		15.821	15.7697	17.0373	16.2715	16.6359	16.751	17.2919	16.5752	17.299	16.8111	16.3847	16.6118	16.5981	16.3756	16.8106	17.0268	16.6916	17.2278	16.6212	16.9756	17.0578	17.1988	17.2931	17.1242
	0.608269	0.842088	1.79264	High	Q6PJ69	Tripartite motif-containing protein 65 OS=Homo sapiens OX=9606	TRIM65	+	Cluster -803	2.72233	0.000871716	4.083	5	2	14	2	517	57.3	6.7		13.4162	14.8905	15.3234	15.1097	15.072	15.3021	15.6823	14.9365	15.5377	15.1586	15.0675	14.786	14.9106	15.0607	15.0434	14.4456	14.6561	14.7324	15.0224	15.0589	15.0352	15.3509	15.1262	14.9728
	0.185311	0.817633	1.76251	High	P01859	Immunoglobulin heavy constant gamma 2 OS=Homo sapiens OX=9606	IGHG2			NaN	NaN	64.299	38	8	933	4	326	35.9	7.59		10.7053	14.416	13.4301	13.6132	14.2592	12.8342	14.9294	11.1353	14.9396	13.1579	12.5668	13.5003	15.069	13.1919	12.8423	11.7368	14.1978	14.979	12.9263	13.7941	14.5101	13.9532	12.8155	14.0429
	0.526486	0.813425	1.75738	High	P31942	Heterogeneous nuclear ribonucleoprotein H3 OS=Homo sapiens OX=9606	HNRNPH3	+	Cluster -800	3.41102	0.000343257	5.624	8	2	9	2	346	36.9	6.87		14.752	12.8128	13.3737	14.3751	14.0658	14.4632	14.9525	13.7569	14.6694	14.105	14.1795	13.9175	14.0024	14.1743	14.2187	15.1025	15.1701	15.0492	14.7444	14.667	14.3262	14.7687	14.6304	14.2419
	0.571036	0.791508	1.73088	High	P41252	Isoleucine--tRNA ligase, cytoplasmic OS=Homo sapiens OX=9606	IARS1	+	Cluster -803	2.00852	0.00409007	7.271	3	3	28	3	1262	144.4	6.15		13.3503	14.8879	15.1016	14.3164	15.1153	15.4676	15.4768	14.6891	15.5484	15.3038	14.8437	14.8528	15.4922	15.5536	15.8752	15.457	15.3777	13.7495	15.9198	15.6341	15.8435	15.5278	15.5402	15.3605
	0.544652	0.715006	1.64149	High	Q9UHB9	Signal recognition particle subunit SRP68 OS=Homo sapiens OX=9606	SRP68			NaN	NaN	2.749	2	1	5	1	627	70.7	8.56		14.7724	13.7341	12.9905	14.8624	14.5624	14.8184	14.7275	14.0275	14.887	14.7304	14.2451	14.8107	14.6084	14.8126	14.7932	12.0953	14.8557	14.3718	14.9746	14.9248	14.9905	14.7311	14.5613	14.1984
	0.887103	0.709025	1.6347	High	P30260	Cell division cycle protein 27 homolog OS=Homo sapiens OX=9606	CDC27	+	Cluster -803	1.82523	0.00641849	27.239	14	8	25	8	824	91.8	7.02		17.5467	17.2628	17.263	17.8066	17.576	16.9335	17.3696	18.5731	18.2569	18.0339	17.0198	16.9738	16.9353	17.7241	17.1397	16.9868	17.1481	16.8523	17.0826	16.5902	16.5624	16.9694	16.4991	16.615
	0.594343	0.69403	1.6178	High	Q04206	Transcription factor p65 OS=Homo sapiens OX=9606	RELA	+	Cluster -803	3.60657	0.000210526	7.862	6	3	34	3	551	60.2	5.68		16.1821	15.0991	14.6623	16.1943	16.1078	16.1819	16.3784	15.5029	16.1443	16.0256	16.0309	16.037	15.9122	16.045	15.7563	15.6188	15.049	14.8558	15.9477	16.0538	15.9674	15.9551	16.1259	15.6878
	0.920397	0.693361	1.61705	High	P27816	Microtubule-associated protein 4 OS=Homo sapiens OX=9606	MAP4	+	Cluster -803	3.05391	0.000480519	23.14	8	8	101	8	1152	120.9	5.43		18.3381	17.5264	17.8652	17.9621	17.2855	17.3564	18.9417	18.0886	18.7795	17.3208	17.079	17.271	17.2295	17.4846	17.3538	17.1951	16.9691	17.2869	17.253	17.4659	17.2815	17.0264	16.985	17.8429
	1.28744	0.687428	1.61041	High	Q8IXB1	DnaJ homolog subfamily C member 10 OS=Homo sapiens OX=9606	DNAJC10	+	Cluster -803	7.95985	0	19.675	9	5	125	5	793	91	7.18		17.497	17.6526	17.4519	17.9083	17.8669	17.8485	18.2593	17.7829	18.6216	17.8505	17.3634	17.3275	17.6292	17.6512	17.8889	17.2105	17.0987	17.2777	17.8735	17.8022	18	18.3409	17.989	17.998
	0.398028	0.668626	1.58956	High	P28799	Progranulin OS=Homo sapiens OX=9606	GRN	+	Cluster -803	2.0514	0.00375335	5.218	7	2	12	2	593	63.5	6.83		13.2399	12.714	14.9466	14.4557	14.7968	14.5599	14.7442	14.1537	14.0085	14.1848	13.905	14.1116	14.5482	14.4554	14.5027	14.208	14.1699	14.4805	14.4738	14.5335	14.4571	13.8044	14.0351	13.4357
	0.600532	0.664712	1.58525	High	Q8TDB6	E3 ubiquitin-protein ligase DTX3L OS=Homo sapiens OX=9606	DTX3L	+	Cluster -803	2.52767	0.00131744	10.755	6	4	54	4	740	83.5	8.06		15.0499	16.4912	16.5049	16.1597	17.4657	16.4451	16.6091	16.5317	16.8993	17.2384	16.8941	16.6634	17.0568	17.1916	17.1171	16.1646	16.7696	16.5568	17.1109	17.0314	17.1636	17.0869	17.1681	16.2136
	0.92395	0.607258	1.52336	High	P84098	60S ribosomal protein L19 OS=Homo sapiens OX=9606	RPL19	+	Cluster -800	11.183	0	6.392	9	1	62	1	196	23.5	11.47		15.7576	16.0415	15.6839	16.2242	16.2053	16.4491	16.7228	15.8607	16.7212	16.2904	16.2716	16.4094	16.5712	16.8403	16.8464	16.6602	16.6846	16.6105	17.8368	17.814	17.8221	16.6663	16.6404	16.1318
	0.876063	0.594766	1.51023	High	P05141	ADP/ATP translocase 2 OS=Homo sapiens OX=9606	SLC25A5	+	Cluster -803	6.76437	5.04202e-05	22.305	16	5	326	2	298	32.8	9.69	Met-loss+Acetyl [N-Term]	18.4867	17.7249	17.9085	18.5175	18.4807	18.454	18.9475	18.217	18.7399	18.1263	17.9864	17.8785	18.3831	18.5512	18.375	17.5812	17.5759	17.5995	18.6459	18.7076	18.6684	18.6047	18.4838	18.1882
	0.706579	0.576082	1.4908	High	P03928	ATP synthase protein 8 OS=Homo sapiens OX=9606	MT-ATP8	+	Cluster -803	2.07328	0.00356216	2.696	13	1	29	1	68	8	9.91		16.0761	15.5361	15.7189	15.818	16.2449	15.9818	15.7033	16.5253	16.8307	15.3584	15.3743	15.0976	15.3817	15.3866	15.2581	15.2132	15.11	14.885	15.4679	15.4792	15.3195	15.6353	15.3972	16.2606
	1.40679	0.568611	1.48309	High	P14314	Glucosidase 2 subunit beta OS=Homo sapiens OX=9606	PRKCSH	+	Cluster -803	6.73005	4.97925e-05	17.49	16	5	35	5	528	59.4	4.41		19.4951	19.8639	19.8921	19.2726	19.3669	19.3586	20.4348	20.0437	20.4785	19.6603	19.8533	19.7327	19.8411	20.0728	20.0055	19.9367	19.9719	19.9278	20.0038	20.0863	20.0918	20.0714	20.0579	19.9219
	0.201939	0.561968	1.47628	High	Q13509	Tubulin beta-3 chain OS=Homo sapiens OX=9606	TUBB3			NaN	NaN	104.757	35	12	2252	2	450	50.4	4.93		13.1712	16.2664	16.2601	11.7985	12.2455	12.9389	16.3518	15.3306	15.7013	14.9752	12.5522	13.4982	12.0544	16.3716	13.6133	14.7932	12.3214	14.5288	15.2285	15.0424	13.79	15.0673	15.4143	14.6855
	1.06772	0.556884	1.47109	High	Q14694	Ubiquitin carboxyl-terminal hydrolase 10 OS=Homo sapiens OX=9606	USP10	+	Cluster -803	8.35076	0	4.032	3	2	24	2	798	87.1	5.31		15.4399	15.8691	15.5312	16.373	16.573	16.1727	16.4123	15.7574	16.3411	16.6424	16.0377	16.1647	16.3961	16.5641	16.3495	15.6246	15.691	15.6779	16.2884	16.3927	16.5301	16.8676	16.8659	16.5302
	1.06971	0.554872	1.46904	High	P46778	60S ribosomal protein L21 OS=Homo sapiens OX=9606	RPL21	+	Cluster -800	8.30383	0	7.589	16	2	19	2	160	18.6	10.49		15.0475	15.376	15.3926	15.6513	15.7371	15.6558	16.0094	15.3959	16.0755	15.2387	15.5487	14.9601	15.5214	15.7674	15.5497	16.1377	15.6138	15.4496	17.5968	17.5123	17.3783	15.5468	15.7226	15.5578
	0.57401	0.554259	1.46841	High	P22102	Trifunctional purine biosynthetic protein adenosine-3 OS=Homo sapiens OX=9606	GART	+	Cluster -803	4.21456	9.2437e-05	12.528	4	4	77	4	1010	107.7	6.7		16.0974	15.6939	16.9605	16.6556	16.3615	16.8493	17.1433	16.413	16.8584	16.9883	16.7021	16.5147	16.9266	16.9676	16.8106	16.1233	16.1483	16.1664	17.0388	17.0325	17.0776	17.0848	16.8976	16.4159
	0.257772	0.535627	1.44957	High	Q6UN15	Pre-mRNA 3'-end-processing factor FIP1 OS=Homo sapiens OX=9606	FIP1L1			NaN	NaN	9.567	7	2	44	2	594	66.5	5.59		15.712	15.4141	15.6282	15.4559	15.6805	15.4694	17.6903	14.9131	15.7578	15.2742	16.8068	14.7621	15.4075	17.4885	17.203	15.5349	17.0876	15.9048	17.2868	15.5383	15.4958	16.8364	16.7705	15.5933
	0.826099	0.519632	1.43359	High	P35268	60S ribosomal protein L22 OS=Homo sapiens OX=9606	RPL22	+	Cluster -803	9.69826	0	23.273	39	3	284	3	128	14.8	9.19		19.6701	19.2443	19.3856	20.0733	20.1309	20.1968	20.3185	19.442	20.0984	19.9301	19.5886	19.4924	20.0512	20.1861	20.1371	19.6506	19.6831	19.6911	20.2356	20.3215	20.237	20.0481	20.0648	19.7108
	0.432781	0.518523	1.43249	High	Q9Y4C2	TRPM8 channel-associated factor 1 OS=Homo sapiens OX=9606	TCAF1	+	Cluster -803	3.62417	0.000206262	6.98	3	3	22	3	921	102.1	6.54		15.042	14.9381	16.235	16.0127	16.1776	16.1255	16.1722	15.3267	16.2718	14.9843	16.021	14.5624	16.1182	16.3231	16.1139	14.1752	14.0254	14.0188	14.6914	16.0059	14.9442	16.031	16.1079	15.7433
	0.500707	0.518444	1.43241	High	Q9BRP1	Programmed cell death protein 2-like OS=Homo sapiens OX=9606	PDCD2L			NaN	NaN	4.021	6	2	16	2	358	39.4	4.86	Met-loss+Acetyl [N-Term]	13.4882	14.2425	13.3172	11.9963	13.8875	13.6516	14.7327	13.5357	14.3348	14.4252	13.7596	15.2349	13.024	10.954	14.7525	14.0052	13.4929	12.1135	13.9943	14.1598	14.9973	14.7174	15.2201	13.3264
	0.785133	0.512536	1.42656	High	O15075	Serine/threonine-protein kinase DCLK1 OS=Homo sapiens OX=9606	DCLK1	+	Cluster -803	7.75786	0	5.624	3	2	44	2	740	82.2	8.66		15.3909	14.8804	15.4454	14.5596	14.5074	14.6782	16.0338	15.2709	15.9496	14.7245	14.8506	14.9065	15.2764	15.5076	15.5265	14.1011	13.6454	13.9854	15.3078	15.6195	15.5994	15.6602	15.4469	15.1934
	0.281164	0.499318	1.41355	High	Q9BRL6	Serine/arginine-rich splicing factor 8 OS=Homo sapiens OX=9606	SRSF8	+	Cluster -803	2.42608	0.00167591	2.698	3	1	7	1	282	32.3	11.72		12.6107	14.6526	13.1332	14.1848	14.4922	14.5973	14.5239	13.2684	14.1022	14.3505	13.7124	13.8268	14.0156	14.2609	14.256	14.2363	14.1862	14.2415	14.1529	14.0795	14.3215	14.0989	13.987	13.7609
	0.713928	0.488019	1.40252	High	Q9UPW5	Cytosolic carboxypeptidase 1 OS=Homo sapiens OX=9606	AGTPBP1	+	Cluster -803	2.19096	0.00272376	2.981	2	1	10	1	1226	138.4	6.15		20.1055	20.5105	20.5475	19.4845	20.1617	20.3737	21.1649	20.3191	21.1435	20.7407	19.5724	19.4464	19.9686	20.6277	20.289	19.9896	19.9829	20.4262	20.2148	20.3243	20.2361	20.1021	20.0142	19.5747
	0.974296	0.48591	1.40047	High	Q5QNW6	Histone H2B type 2-F OS=Homo sapiens OX=9606	H2BC18	+	Cluster -800	13.572	0	14.019	23	3	155	1	126	13.9	10.32		16.9074	16.9054	17.0131	16.7639	16.8622	16.7937	17.7051	16.9693	17.6092	16.3034	16.0657	16.1665	16.8814	16.9684	16.9368	17.6773	17.673	17.7709	16.9897	16.895	16.9119	17.3828	17.35	16.9101
	1.15753	0.46214	1.37758	High	P41250	Glycine--tRNA ligase OS=Homo sapiens OX=9606	GARS1	+	Cluster -803	8.05897	0	7.412	3	2	42	2	739	83.1	7.03		16.0485	16.3021	16.1382	16.2917	16.6046	16.681	16.848	16.2858	16.7415	16.6815	16.5568	16.5926	16.7551	17.0499	16.8139	16.2617	16.3107	16.5279	16.6906	16.8289	16.7576	16.4615	16.4544	16.2463
	0.827614	0.447186	1.36338	High	Q13085	Acetyl-CoA carboxylase 1 OS=Homo sapiens OX=9606	ACACA	+	Cluster -803	6.2801	4.30108e-05	12.42	3	5	61	5	2346	265.4	6.37		16.1824	15.9518	16.2714	16.5051	16.2084	16.6217	17.0046	16.2061	16.5366	16.6668	16.4725	16.4011	16.6709	16.7938	16.7298	15.8523	16.2934	16.303	16.6661	16.8338	16.6148	16.909	16.8463	16.5361
	0.390549	0.443649	1.36004	High	Q00839	Heterogeneous nuclear ribonucleoprotein U OS=Homo sapiens OX=9606	HNRNPU	+	Cluster -800	5.78885	3.82166e-05	30.144	12	7	156	7	825	90.5	6		18.3628	18.0497	17.8573	18.2552	18.5248	18.5184	18.8585	17.6333	19.109	18.5588	17.9751	18.227	18.4121	18.2315	18.2452	19.1188	19.0062	19.1673	18.6449	18.901	18.9445	18.4045	18.1788	17.7751
	0.132982	0.439811	1.35643	High	P51153	Ras-related protein Rab-13 OS=Homo sapiens OX=9606	RAB13			NaN	NaN	7.419	12	2	91	1	203	22.8	9.19		13.3674	13.5577	13.8928	13.1456	12.685	14.9973	15.3877	11.6349	15.1147	14.9574	14.4162	14.4953	15.0606	15.3365	12.6856	12.6391	12.6511	12.6308	15.0935	15.1461	15.1117	15.1577	15.2721	14.7992
	0.558245	0.424457	1.34207	High	Q9P291	Armadillo repeat-containing X-linked protein 1 OS=Homo sapiens OX=9606	ARMCX1	+	Cluster -803	3.26054	0.000411467	4.513	5	2	19	2	453	49.2	9.22		15.5221	14.5373	14.7128	15.5175	15.5333	15.6054	15.5883	15.0804	15.3769	15.4208	15.0506	15.1905	15.5489	15.4569	15.6831	14.4885	12.8675	14.1838	14.52	15.5542	15.9017	16.011	15.8743	15.4791
	0.990624	0.408763	1.32755	High	O14920	Inhibitor of nuclear factor kappa-B kinase subunit beta OS=Homo sapiens OX=9606	IKBKB	+	Cluster -803	3.88243	0.000149312	4.321	3	2	6	2	756	86.5	5.78		15.0293	15.3801	14.8713	14.4124	15.2827	15.1178	15.6942	15.2765	15.5361	15.0627	14.9202	14.8521	15.3476	15.3785	15.2341	14.6215	14.5819	14.7261	15.0035	15.184	15.214	15.2767	15.2322	14.9607
	0.253641	0.408029	1.32687	High	Q9UQ35	Serine/arginine repetitive matrix protein 2 OS=Homo sapiens OX=9606	SRRM2	+	Cluster -800	5.11135	4.37158e-05	3.957	1	2	5	2	2752	299.4	12.06		14.3749	12.6865	13.2979	14.2543	14.0511	14.4348	14.4276	13.0756	14.0803	14.2169	13.6605	13.322	14.5025	14.4357	14.2377	14.9504	15.1081	15.337	15.8568	15.6364	15.7597	14.6379	14.6125	15.1097
	0.651688	0.403121	1.32237	High	Q9H4L5	Oxysterol-binding protein-related protein 3 OS=Homo sapiens OX=9606	OSBPL3	+	Cluster -803	2.79142	0.000744914	3.224	1	1	8	1	887	101.2	6.87		13.4241	13.2623	13.012	11.9364	13.6578	13.2595	13.1376	13.9586	13.8116	13.7996	13.9499	13.6207	14.1216	14.049	13.9767	13.7579	13.8832	13.7657	14.2107	14.2723	14.4132	14.4133	14.371	13.989
	0.369909	0.402855	1.32212	High	Q15029	116 kDa U5 small nuclear ribonucleoprotein component OS=Homo sapiens OX=9606	EFTUD2	+	Cluster -800	5.53911	3.64742e-05	7.883	4	3	30	3	972	109.4	5		15.6937	14.889	15.729	15.6399	15.3687	15.4237	16.0912	15.1229	16.3062	15.8316	15.9476	15.6684	16.0236	16.1754	16.1417	16.1681	16.1023	16.2964	16.1593	16.1872	16.3202	16.3383	16.318	16.1187
	0.314365	0.394857	1.31481	High	Q9BQ69	ADP-ribose glycohydrolase MACROD1 OS=Homo sapiens OX=9606	MACROD1	+	Cluster -803	3.36505	0.000363636	5.19	6	2	17	2	325	35.5	9.51		14.7674	15.8892	15.5454	15.9403	15.8926	15.8513	16.3266	15.0305	16.0295	15.5708	15.4101	15.6837	15.8266	16.0932	15.8906	15.2206	15.3524	15.4913	15.6842	16.1912	15.8366	16.2993	16.0992	15.5612
	0.190565	0.388165	1.30873	High	Q15717	ELAV-like protein 1 OS=Homo sapiens OX=9606	ELAVL1	+	Cluster -800	4.12218	0.000106557	5.974	7	2	36	2	326	36.1	9.17		14.531	14.9233	14.0921	15.4187	15.3718	15.4626	15.7994	13.431	15.4806	14.9954	14.4522	14.5939	15.1403	15.191	15.1557	16.0403	15.9309	15.9949	15.4847	15.4311	15.4253	15.4646	15.4331	14.8921
	0.449396	0.38622	1.30696	High	Q76M96	Coiled-coil domain-containing protein 80 OS=Homo sapiens OX=9606	CCDC80	+	Cluster -803	3.80307	0.000161538	18.072	5	5	90	5	950	108.1	9.72		17.445	17.5191	18.1733	17.7615	17.9901	18.1106	18.447	17.5261	18.3229	17.2386	17.8665	17.625	18.2522	18.1614	18.2979	18.1567	17.9335	18.0112	18.336	18.4089	18.1406	18.231	18.2334	18.2084
	0.533047	0.383865	1.30483	High	P29353	SHC-transforming protein 1 OS=Homo sapiens OX=9606	SHC1	+	Cluster -803	7.02644	5.30973e-05	5.329	5	2	36	2	583	62.8	6.44		14.9625	14.4845	15.2159	15.0156	15.0327	15.1932	15.5121	14.8036	15.4987	15.3172	15.0883	14.9896	15.3454	15.3615	15.4771	13.9766	13.9927	14.163	14.7386	15.1296	15.3357	15.545	15.4926	15.1362
	0.171183	0.37759	1.29917	High	Q7Z406	Myosin-14 OS=Homo sapiens OX=9606	MYH14			NaN	NaN	32.965	3	7	287	2	1995	227.7	5.6		13.574	14.2316	14.1322	11.6737	14.1043	15.2217	15.8143	14.2353	13.021	14.9838	15.0134	15.3429	15.2082	14.8423	15.584	15.1634	15.1	12.0169	12.4501	15.7051	14.9903	12.2725	11.9408	12.9569
	0.537631	0.372643	1.29472	High	O94903	Pyridoxal phosphate homeostasis protein OS=Homo sapiens OX=9606	PLPBP	+	Cluster -803	7.52183	4.0404e-05	3.134	3	1	51	1	275	30.3	7.5		15.5249	15.532	15.4348	15.3673	15.541	15.1406	16.3258	15.293	15.9907	15.5566	15.5283	15.2606	14.7819	15.0078	15.1	14.5212	14.4603	14.7817	15.4124	15.3641	15.3578	15.6184	15.5845	15.1586
	0.706323	0.368856	1.29133	High	P22234	Bifunctional phosphoribosylaminoimidazole carboxylase/phosphoribosylaminoimidazole succinocarboxamide synthetase OS=Homo sapiens OX=9606	PAICS	+	Cluster -803	10.8381	0	15.161	8	3	204	3	425	47	7.23		17.6205	17.3776	17.3728	17.8808	17.916	17.9245	18.0908	17.3807	18.0059	17.9378	17.8797	17.6685	18.1061	18.1979	18.0931	17.9232	17.8469	17.9164	18.0097	18.0463	18.102	18.0287	17.9407	17.7304
	0.441818	0.362886	1.286	High	P68032	Actin, alpha cardiac muscle 1 OS=Homo sapiens OX=9606	ACTC1	+	Cluster -803	7.97084	0	146.229	53	18	2410	5	377	42	5.39		19.2124	19.1461	19.2703	18.4965	18.5759	18.5646	20.0342	18.8842	19.799	18.1988	18.1682	18.097	18.6731	18.7572	18.7517	18.4904	18.7141	18.5582	18.9322	18.9283	18.8023	18.7342	18.6723	18.1367
	0.548549	0.361117	1.28442	High	Q9Y490	Talin-1 OS=Homo sapiens OX=9606	TLN1	+	Cluster -803	8.8219	0	20.893	4	8	86	8	2541	269.6	6.07		17.9096	17.8326	17.8831	17.8874	17.8709	17.7839	18.6047	17.6633	18.4407	17.5374	17.3253	17.2656	17.6033	17.6569	17.6938	17.1529	17.1803	17.355	17.3203	17.3723	17.4601	17.5554	17.158	16.8408
	0.284245	0.356142	1.28	High	Q92817	Envoplakin OS=Homo sapiens OX=9606	EVPL	+	Cluster -800	1.68919	0.00897243	96.373	18	28	135	28	2033	231.5	6.96		15.3314	15.4134	15.3562	15.7948	16.4482	16.9854	16.7182	15.08	15.3712	16.2094	14.5815	15.035	15.9421	15.5811	16.1525	16.2033	15.9952	15.2397	16.0519	15.2577	15.5937	15.6776	15.7912	15.4822
	0.568843	0.350381	1.2749	High	P55265	Double-stranded RNA-specific adenosine deaminase OS=Homo sapiens OX=9606	ADAR	+	Cluster -803	3.91046	0.000135189	13.35	4	5	167	5	1226	136	8.65		17.4125	17.4534	17.501	17.5467	18.0974	17.4668	18.286	17.342	17.7901	17.5646	17.3264	17.4249	17.6341	17.7949	18.256	17.0831	16.8644	16.2415	17.4013	17.8149	17.7079	17.8629	17.8573	17.6231
	0.152913	0.345459	1.27056	High	Q9NVD7	Alpha-parvin OS=Homo sapiens OX=9606	PARVA			NaN	NaN	4.621	4	1	30	1	372	42.2	5.95		15.756	15.6509	13.2084	15.1268	14.8799	15.0307	15.4611	14.9791	15.2114	14.8	15.1404	14.5775	14.9281	14.9517	14.8751	14.5331	14.5938	14.3304	15.0798	15.0222	14.727	15.2891	15.2272	15.0801
	0.416102	0.331018	1.2579	High	Q9Y6W5	Actin-binding protein WASF2 OS=Homo sapiens OX=9606	WASF2	+	Cluster -803	2.65312	0.00100457	6.923	5	2	48	2	498	54.3	5.53		15.7113	16.1832	15.3573	15.0118	15.082	15.9652	16.2987	15.6031	16.343	15.8401	15.2841	15.5334	15.2899	15.8052	15.7537	14.7434	14.9838	15.2938	15.7168	15.77	15.8729	15.6793	15.9332	15.4773
	0.227163	0.32888	1.25604	High	Q9H078	Caseinolytic peptidase B protein homolog OS=Homo sapiens OX=9606	CLPB	+	Cluster -803	4.90077	5.11509e-05	8.705	6	4	17	4	707	78.7	9.01		15.27	15.0738	14.8057	15.9826	16.083	15.4759	16.2516	14.3617	15.5229	15.2447	15.0022	15.0822	16.3602	16.5061	16.4651	15.2946	15.1057	15.3545	15.616	15.8311	15.3357	15.712	15.6767	15.2704
	0.517728	0.316565	1.24536	High	P11802	Cyclin-dependent kinase 4 OS=Homo sapiens OX=9606	CDK4	+	Cluster -803	3.61451	0.000211679	8.12	9	3	106	2	303	33.7	7.01		15.3335	15.017	15.7096	15.7078	15.6124	15.4815	15.8357	15.3126	15.8615	15.7032	15.2609	15.3304	16.1267	16.1707	16.0806	15.7561	14.6719	15.4996	15.7208	15.9662	16.0764	15.9121	15.8923	15.4335
	0.255696	0.315624	1.24455	High	P47897	Glutamine--tRNA ligase OS=Homo sapiens OX=9606	QARS1	+	Cluster -803	2.50486	0.00136484	10.544	6	4	43	4	775	87.7	7.15		14.8096	16.1504	15.3973	15.376	14.8668	16.2142	16.267	15.2294	15.8079	16.0735	15.9168	15.7254	16.1969	16.0194	16.1502	15.6897	15.7873	15.5222	16.245	16.3564	16.4492	16.1309	16.2978	15.3982
	0.424	0.309928	1.23965	High	Q9HA64	Ketosamine-3-kinase OS=Homo sapiens OX=9606	FN3KRP	+	Cluster -803	8.45768	0	43.994	25	6	267	6	309	34.4	7.33		19.9985	20.0219	20.0119	19.8167	20.1123	20.2022	20.7516	19.7147	20.4958	20.2852	20.143	20.0766	20.2033	20.3953	20.4593	19.1178	19.1777	18.6704	20.4522	20.5273	20.5239	20.1298	20.1223	19.7189
	0.143825	0.298322	1.22971	High	P48643	T-complex protein 1 subunit epsilon OS=Homo sapiens OX=9606	CCT5	+	Cluster -803	2.87367	0.000675159	6.17	4	2	42	2	541	59.6	5.66		14.8148	13.3068	15.9646	15.6149	15.6095	15.6326	15.0138	14.9588	15.0086	15.9765	16.1131	16.0438	15.9842	16.331	16.1871	16.1572	16.0426	16.2012	15.9685	16.0291	15.9367	16.3778	16.2616	15.1458
	0.164805	0.294787	1.2267	High	P15170	Eukaryotic peptide chain release factor GTP-binding subunit ERF3A OS=Homo sapiens OX=9606	GSPT1	+	Cluster -803	1.99357	0.00426385	5.948	4	2	21	2	499	55.7	5.62		15.3091	16.8201	14.9437	16.3473	16.4811	16.4741	16.4663	15.3003	16.1906	16.2867	15.8943	16.0142	15.7859	15.9459	15.9599	15.6683	15.6335	15.6713	16.0039	16.0492	16.0402	16.1554	16.0901	15.2544
[truncated: 953 more rows]

## Sheet: Ratio uGIPpolyG (Ex4) vs GFP
Significant	-LOG(P-value)	Difference log2	Ratio GIP4/GFP	Protein FDR Confidence: Combined	Accession	Description	Gene Name	ANOVA Significant	Cluster	-Log ANOVA P value	ANOVA q-value	Sum PEP Score	Coverage [%]	# Peptides	# PSMs	# Unique Peptides	# AAs	MW [kDa]	calc. pI	Modifications	XIC S01rep1	XIC S01rep2	XIC S01rep3	XIC S02rep1	XIC S02rep2	XIC S02rep3	XIC S03rep1	XIC S03rep2	XIC S03rep3	XIC S04rep1	XIC S04rep2	XIC S04rep3	XIC S05rep1	XIC S05rep2	XIC S05rep3	XIC S06rep1	XIC S06rep2	XIC S06rep3	XIC S07rep1	XIC S07rep2	XIC S07rep3	XIC S08rep1	XIC S08rep2	XIC S08rep3
[truncated: 1,037 more rows]

[truncated: 3 more sheets: Ratio uN2CpolyG vs GFP, Ratio asRILpolyG vs GFP, Ratio LOC6polyG vs GFP]
