# Supplementary material for: Microsatellite expansions hidden within the human dark genome are translated in novel and toxic proteins causing muscle and neurodegenerative diseases
Source: Research Square preprint supplement (doi:10.21203/rs.3.rs-6122917/v1), 2025-04-17
Supplement: Supplementary file 2 [file 4748617c7f5d3bedb10bf23d.xlsx]

## Sheet: Feuil1
Muscle fibers type I				Muscle fibers IIA				Muscle fibers IIB				Muscle fibers IIX				Muscle fibers IIA IIX
log2FC	p-value adj	gene		log2FC	p-value adj	gene		log2FC	p-value adj	gene		log2FC	p-value adj	gene		log2FC	p-value adj	gene
-2.00825	0.000127174	Ugp2		-1.68472	4.27169e-05	Cited2		-1.36406	5.63379e-08	Slc35e2		-2.09142	6.20418e-08	Nle1		-2.49942	4.31881e-08	Ugp2
-2.72449	0.00274444	Ccn2		1.17303	7.91197e-05	Slc25a22		-1.22954	2.19551e-07	Col15a1		-1.80232	1.73673e-06	Unc45b		-1.77161	9.30634e-08	Ell
-1.89187	0.0109756	Aebp1		-1.39509	0.000275308	Bdh1		0.277131	4.97477e-07	As3mt		-1.95239	5.46196e-05	Ugp2		-1.60698	9.95212e-06	P4ha1
-1.88764	0.0125584	Ell		-1.72703	0.000430293	Nle1		0.129801	9.46498e-07	Nceh1		-1.41129	0.0182816	Nt5dc3		-1.6518	2.11839e-05	Noct
				-1.78179	0.000603529	Ugp2		0.0898145	6.50155e-06	Pdgfb						0.88864	2.78787e-05	Alad
				0.397982	0.00226216	Cpt1a		-1.09322	8.49484e-06	Smarcd3						-1.71347	9.82752e-05	Apba3
				-1.2246	0.00342094	Spata1		0.602311	8.73917e-06	Prune2						1.5251	0.000114675	Slc25a22
				-0.947389	0.00396431	Smarcd3		0.757805	1.99877e-05	Sbk2						1.31814	0.00014392	Pgm1
				-1.71035	0.00425579	Pde4b		0.127118	4.25364e-05	Nes						-1.89641	0.000490088	Adamts1
				-1.36415	0.00433467	Rab30		1.0712	0.00044942	Arpp21						-1.5749	0.00142328	Mad2l1bp
				-1.20686	0.00680538	Slc35e2		-0.0804827	0.000765798	Prkg1						1.0238	0.00192826	Nt5dc1
				-1.32353	0.00685521	Apba3		0.129706	0.00170039	Stom						0.806246	0.00250096	Cpt1a
				-1.26347	0.0133027	Slc38a4		-1.24762	0.00186894	Banp						-1.50529	0.00298485	Slc35e2
				-1.45118	0.0144328	Pdlim1		-0.118764	0.00215002	Eme2						1.01701	0.00345691	Scn2a
				-0.962194	0.031602	P4ha2		-1.26823	0.00240252	Noxred1						-1.76327	0.00346855	Noxred1
				0.74779	0.0327213	Hadh		1.13928	0.00253314	Slc25a22						-1.39073	0.00613791	Spata1
				0.45372	0.0331818	H2-K1		-1.19123	0.00423196	Rhoj						1.11757	0.0067578	Hadh
				-1.38087	0.0360381	Eya1		-1.18067	0.00431351	Tm6sf2						-1.73988	0.00879862	Unc45b
								-1.16685	0.00460575	Slc39a10						-1.44522	0.0107722	Rab30
								-0.966793	0.00671382	Irf3						-1.1815	0.0188012	Yipf7
								-1.703	0.00682441	Nle1						1.37221	0.0202683	Anxa5
								-0.905141	0.00909872	Glt8d1						-1.16151	0.0227591	Optn
								-0.904267	0.014348	P4ha2						-1.1355	0.0280307	Pdlim1
								0.498388	0.0156547	Ccdc85a						1.04676	0.0322758	Hdac7
								-1.66499	0.0254854	Cited2						-1.20451	0.0378915	Kpna1
								-0.018199	0.0263079	Pkig						1.75928	0.0383702	Pfkfb3
								-0.633351	0.0308212	Dipk1b						-1.09369	0.0477093	Ubxn4
								-1.01023	0.0396824	Inha						-1.13192	0.0490061	P4ha2
								-1.08095	0.0478499	Ubc						-1.41472	0.0491418	Slc20a1
