# Supplementary material for: Microsatellite expansions hidden within the human dark genome are translated in novel and toxic proteins causing muscle and neurodegenerative diseases
Source: Research Square preprint supplement (doi:10.21203/rs.3.rs-6122917/v1), 2025-04-17
Supplement: Supplementary file 3 [file f78fdcf0870643ce1d88743b.xlsx]

## Sheet: Ratio TMP 1 µM vs Ctl
Significant	-LOG(P-value)	Difference log2	Ratio TMP 1/Ctl	Protein FDR Confidence: Combined	Accession	Description	Gene Name	ANOVA Significant	Cluster	-Log ANOVA P value	ANOVA q-value	Sum PEP Score	Coverage [%]	# Peptides	# PSMs	# Unique Peptides	# AAs	MW [kDa]	calc. pI	PSMs S01	PSMs S01bis	PSMs S02	PSMs S03	PSMs S04	PSMs S04bis	PSMs S05	PSMs S06	PSMs S07	PSMs S07bis	PSMs S08	PSMs S09	# Protein Groups	Modifications	XIC S01	XIC S02	XIC S03	XIC S04	XIC S05	XIC S06	XIC S07	XIC S08	XIC S09
	2.71481	2.87839	7.35327	High	Q69YN4	Protein virilizer homolog OS=Homo sapiens OX=9606	VIRMA			1.40599	0.127508	44.772	7	9	27	9	1812	201.9	5.01													1		-6.17712	-6.59906	-6.62358	-3.54051	-4.25163	-2.97246	-2.90901	-4.94283	-6.21741
+	3.70463	2.46018	5.50284	High	Q13427	Peptidyl-prolyl cis-trans isomerase G OS=Homo sapiens OX=9606	PPIG	+	Cluster -67	5.6581	0	15.683	8	3	12	3	754	88.6	10.29													1		-4.57602	-4.5481	-5.12198	-2.33285	-2.26843	-2.26429	-1.57683	-1.59425	-1.46527
+	4.2893	2.09125	4.26116	High	P48060	Glioma pathogenesis-related protein 1 OS=Homo sapiens OX=9606	GLIPR1	+	Cluster -67	5.26282	0.052	11.823	12	2	21	2	266	30.3	8.48										1			1		-4.50621	-4.40171	-4.44802	-2.3331	-2.56284	-2.18626	-1.44188	-1.97573	-1.72544
	3.32727	1.82057	3.53222	High	Q9Y3A6	Transmembrane emp24 domain-containing protein 5 OS=Homo sapiens OX=9606	TMED5	+	Cluster -67	4.20843	0.0386667	7.384	10	2	11	2	229	26	4.84	1				1				3	3	1	2	1		-4.26952	-4.36354	-4.55597	-2.27196	-2.74165	-2.71371	-1.72824	-2.2626	-1.61622
	1.92664	1.80086	3.48429	High	P38159	RNA-binding motif protein, X chromosome OS=Homo sapiens OX=9606	RBMX	+	Cluster -67	3.33168	0.0371579	18.594	11	4	95	4	391	42.3	10.05													1		-5.31823	-5.63286	-6.05939	-3.80266	-3.29881	-4.50641	-2.74423	-2.97494	-2.72459
	0.504181	1.77778	3.42898	High	Q9UM19	Hippocalcin-like protein 4 OS=Homo sapiens OX=9606	HPCAL4			0.522108	0.380622	8.256	12	2	13	2	191	22.2	4.89	2	1	2	3	3	1						1	1		-0.899123	-5.43468	-0.722928	-0.580667	-0.542067	-0.600657	-0.38986	-0.544488	-0.226076
	0.962852	1.61128	3.05522	High	P32455	Guanylate-binding protein 1 OS=Homo sapiens OX=9606	GBP1			1.04086	0.190866	16.903	6	2	171	1	592	67.9	6.32	13	15	11	12	10	11	14	8	15	12	13	13	1		-3.14655	-5.59405	-5.35424	-2.98448	-3.01929	-3.25723	-3.1678	-3.30591	-3.4701
+	4.40649	1.59768	3.02656	High	P52907	F-actin-capping protein subunit alpha-1 OS=Homo sapiens OX=9606	CAPZA1	+	Cluster -67	4.76302	0.04	98.143	47	8	1219	6	286	32.9	5.69	51	56	53	48	43	60	55	58	51	51	54	53	1		2.77823	2.6637	2.75157	4.29263	4.22379	4.47013	5.90501	5.17536	5.45818
	0.798938	1.50822	2.84459	High	O43674	NADH dehydrogenase [ubiquinone] 1 beta subcomplex subunit 5, mitochondrial OS=Homo sapiens OX=9606	NDUFB5			0.919203	0.214927	14.823	13	2	42	2	189	21.7	9.63	1						2				1	1	1		-3.3559	-5.86126	-3.87505	-3.49724	-3.01034	-2.05997	-2.36043	-2.12784	-3.29967
	0.780848	1.38484	2.61143	High	O15061	Synemin OS=Homo sapiens OX=9606	SYNM			0.838879	0.241208	41.504	8	9	62	9	1565	172.8	5.15						1			2	3		1	1		-4.32896	-2.63884	-4.04641	-3.53031	-1.82773	-1.50164	-1.35397	-2.19372	-2.70927
	1.20481	1.37487	2.59344	High	O95376	E3 ubiquitin-protein ligase ARIH2 OS=Homo sapiens OX=9606	ARIH2			1.45032	0.125296	7.706	12	3	12	3	493	57.8	5.63	1	2	2			1		1					1		-4.07073	-5.46783	-5.70089	-3.72262	-3.98831	-3.40393	-3.82025	-3.86875	-3.38237
	2.24126	1.3743	2.59242	High	P08962	CD63 antigen OS=Homo sapiens OX=9606	CD63	+	Cluster -67	3.2138	0.03808	47.115	19	5	396	5	238	25.6	7.81	7	6	8	8	20	20	20	25	24	23	24	24	1		1.09821	0.83505	1.47972	2.1697	2.73052	2.63567	2.60658	2.74978	2.71166
	0.712461	1.35923	2.56548	High	P53675	Clathrin heavy chain 2 OS=Homo sapiens OX=9606	CLTCL1			0.490932	0.399215	199.862	12	18	2218	1	1640	186.9	5.85	77	85	79	72	84	87	88	96	94	96	100	95	1		-4.67959	-1.91412	-4.31894	-2.37208	-2.34146	-2.12141	-3.90283	-2.47078	-2.33272
	1.3259	1.32687	2.50858	High	O15327	Inositol polyphosphate 4-phosphatase type II OS=Homo sapiens OX=9606	INPP4B			0.657714	0.309636	3.749	2	1	7	1	924	104.7	6.27	2	1				1		1	1	1			1		-3.86784	-3.93409	-3.60149	-2.59308	-3.20014	-1.62959	-2.05594	-4.33638	-2.7573
	1.64214	1.32185	2.49986	High	O43823	A-kinase anchor protein 8 OS=Homo sapiens OX=9606	AKAP8			1.4547	0.12495	37.139	20	7	44	7	692	76.1	5.15	2												1		-3.4886	-3.99673	-3.29784	-2.87349	-1.91266	-2.03147	-2.67719	-3.54403	-3.69015
	1.40913	1.29665	2.45658	High	P03886	NADH-ubiquinone oxidoreductase chain 1 OS=Homo sapiens OX=9606	MT-ND1			2.22924	0.06239	13.639	6	1	42	1	318	35.6	6.55	3	1	1	1	2	1	2	2	4	4	1	3	1		-3.24348	-3.49878	-4.62043	-2.50551	-2.6045	-2.36274	-1.61424	-2.16016	-1.87593
	2.32711	1.17973	2.26535	High	Q16864	V-type proton ATPase subunit F OS=Homo sapiens OX=9606	ATP6V1F	+	Cluster -67	3.14968	0.0402807	8.46	22	2	33	2	119	13.4	5.52										3			1		-5.22909	-5.02684	-4.90761	-4.2144	-3.57849	-3.83145	-2.41082	-3.24983	-3.12248
	0.862636	1.17273	2.25439	High	Q96J84	Kin of IRRE-like protein 1 OS=Homo sapiens OX=9606	KIRREL1			1.25458	0.150554	15.069	7	3	20	3	757	83.5	5.73			3		2		1	2	1	4	2	2	1		-4.2521	-5.57978	-5.20665	-3.25779	-3.44137	-4.82116	-3.09274	-3.73858	-3.32525
	0.74043	1.15544	2.22752	High	Q9GZS1	DNA-directed RNA polymerase I subunit RPA49 OS=Homo sapiens OX=9606	POLR1E			0.593132	0.340983	35.992	31	9	132	9	419	47.2	8.94													1	Met-loss+Acetyl [N-Term]	-3.1321	-1.69142	-3.66533	-1.66166	-0.977345	-2.38352	-1.86008	-1.6571	-2.6391
	0.598082	1.15303	2.22381	High	Q6UVY6	DBH-like monooxygenase protein 1 OS=Homo sapiens OX=9606	MOXD1			0.474189	0.410815	10.584	9	3	19	3	613	69.6	6.43													1		-5.45758	-6.57607	-5.83681	-5.45746	-5.73726	-3.21663	-5.61559	-5.21261	-5.39729
	1.49113	1.13568	2.19723	High	Q5T8D3	Acyl-CoA-binding domain-containing protein 5 OS=Homo sapiens OX=9606	ACBD5			2.33831	0.0590297	6.78	4	2	60	2	534	60.1	5.33	3	3	2	7	2	4	4	4	1	6	2	4	1		-2.15666	-2.70976	-2.82255	-1.99264	-1.06444	-1.22483	-0.940964	-1.10927	-1.02573
	0.931646	1.09669	2.13863	High	P02647	Apolipoprotein A-I OS=Homo sapiens OX=9606	APOA1			0.860829	0.236174	4.265	6	1	10	1	267	30.8	5.76													1		-5.66075	-5.54775	-5.30795	-5.47977	-3.74811	-3.99852	-4.78921	-5.3248	-5.21576
	0.82676	1.09346	2.13385	High	P34810	Macrosialin OS=Homo sapiens OX=9606	CD68			0.921248	0.214724	6.984	6	1	8	1	354	37.4	8.87		1							1				1		-3.87675	-5.97678	-4.96136	-4.02419	-3.76914	-3.74118	-4.02235	-3.88217	-3.60167
	1.36473	1.0533	2.07527	High	P17706	Tyrosine-protein phosphatase non-receptor type 2 OS=Homo sapiens OX=9606	PTPN2			1.28203	0.146076	20.707	18	4	36	4	415	48.4	8.29	1	1	3	4	4	1	1	2	2	2	1	2	1		-3.70704	-3.98619	-2.9133	-2.37601	-2.803	-2.26762	-2.32051	-2.20506	-3.09999
	0.310951	1.03351	2.04699	High	Q5T447	E3 ubiquitin-protein ligase HECTD3 OS=Homo sapiens OX=9606	HECTD3			0.188104	0.682818	6.649	4	2	6	2	861	97.1	5.64	1	1	1				2	1					1		-4.50499	-4.43577	-5.12552	-5.07233	-0.978575	-4.91486	-4.8575	-4.44502	-4.06782
	2.62147	1.01411	2.01966	High	O94966	Ubiquitin carboxyl-terminal hydrolase 19 OS=Homo sapiens OX=9606	USP19	+	Cluster -67	3.13174	0.0399322	27.736	8	5	53	5	1318	145.6	6.28	1	3	4	8	8	6	4	3	4	5	4	3	1		-1.14786	-1.38984	-1.03852	-0.148417	-0.374323	-0.0111408	0.194675	-0.204471	0.303909
	2.23549	1.00859	2.01194	High	P05186	Alkaline phosphatase, tissue-nonspecific isozyme OS=Homo sapiens OX=9606	ALPL			2.93507	0.0532055	59.959	26	9	261	9	524	57.3	6.67					1		1						1		-3.98699	-4.47835	-3.93359	-3.23255	-3.15367	-2.98694	-3.17083	-2.96459	-2.80927
	1.75938	0.990839	1.98734	High	P53801	Pituitary tumor-transforming gene 1 protein-interacting protein OS=Homo sapiens OX=9606	PTTG1IP			2.48734	0.0619592	4.798	10	1	21	1	180	20.3	8.79							3	1	2	3	1	1	1		-4.08668	-4.62728	-3.86802	-3.43151	-3.11803	-3.05991	-2.96314	-2.75786	-3.12274
	0.394146	0.949745	1.93153	High	Q9BYJ9	YTH domain-containing family protein 1 OS=Homo sapiens OX=9606	YTHDF1			0.263667	0.594626	29.621	13	4	57	2	559	60.8	8.79	5	4	3	2	3	2	4	2	1	3	1	2	1		-2.78515	-5.88775	-2.97878	-3.09534	-2.59595	-3.11115	-2.97795	-3.62338	-2.92796
	4.06765	0.892844	1.85683	High	Q05639	Elongation factor 1-alpha 2 OS=Homo sapiens OX=9606	EEF1A2	+	Cluster -67	2.98817	0.0498551	169.637	37	14	5226	2	463	50.4	9.03	242	291	279	319	256	322	270	269	221	273	318	311	1		-1.12476	-1.17268	-1.04076	-0.257972	-0.260851	-0.140848	0.507389	-0.222337	0.295809
	0.839998	0.889589	1.85265	High	Q9Y388	RNA-binding motif protein, X-linked 2 OS=Homo sapiens OX=9606	RBMX2			0.523919	0.379461	14.063	11	3	13	3	322	37.3	9.83													1		-4.63376	-5.14779	-5.54529	-5.02724	-3.65325	-3.97757	-4.55602	-4.32097	-5.71176
	1.11952	0.888105	1.85074	High	Q9UMS0	NFU1 iron-sulfur cluster scaffold homolog, mitochondrial OS=Homo sapiens OX=9606	NFU1			2.00911	0.073065	9.077	9	2	71	2	254	28.4	5.07	3	3	5	5	5	5	9	8	6	4	6	7	1		-1.23685	-1.32801	-1.61182	-1.19721	-0.295414	-0.0197315	0.0125008	-0.0440607	0.165556
	1.78215	0.879791	1.84011	High	Q8IV48	3'-5' exoribonuclease 1 OS=Homo sapiens OX=9606	ERI1	+	Cluster -67	3.00885	0.0483582	5.586	6	2	17	2	349	40	6.7	2	2	1		1	2	1	2	2	2	1	1	1		-2.30021	-2.58716	-2.31167	-1.91896	-1.28341	-1.3573	-0.515694	-1.059	-0.688213
	1.39366	0.876417	1.83581	High	P16403	Histone H1.2 OS=Homo sapiens OX=9606	H1-2			0.777764	0.267024	69.726	26	8	1220	1	213	21.4	10.93	29	38	30	29	35	31	35	44	30	27	40	32	1	Met-loss+Acetyl [N-Term]	-1.76493	-2.25762	-2.29309	-1.7031	-0.945614	-1.03768	-1.98729	-0.619613	-1.68441
	1.42531	0.872144	1.83038	High	Q9Y221	60S ribosome subunit biogenesis protein NIP7 homolog OS=Homo sapiens OX=9606	NIP7			1.82755	0.0867553	26.599	35	4	49	4	180	20.4	8.51										1			1		-2.99643	-2.73549	-2.48838	-2.35213	-1.6797	-1.57204	-1.18491	-1.4375	-1.93169
	3.89471	0.872049	1.83026	High	Q9BQP7	Mitochondrial genome maintenance exonuclease 1 OS=Homo sapiens OX=9606	MGME1	+	Cluster -67	4.02631	0.0348	9.711	9	2	15	2	344	39.4	7.68	1	1	2	1	2		1	2	1	3		1	1		-2.20201	-2.08759	-2.10918	-1.27988	-1.3333	-1.16945	-0.0417767	-0.594125	-0.565018
	0.829874	0.865444	1.8219	High	P03915	NADH-ubiquinone oxidoreductase chain 5 OS=Homo sapiens OX=9606	MT-ND5			1.34946	0.13631	50.019	15	6	127	6	603	67	9.03	2	1	2	3	3	5	4	5	5	3	4	7	1		-0.962083	-1.25924	-2.28429	-1.17787	-0.380434	-0.350975	-0.333138	-0.174777	-0.130604
	1.81064	0.864911	1.82123	High	Q96TC7	Regulator of microtubule dynamics protein 3 OS=Homo sapiens OX=9606	RMDN3			1.27875	0.146435	47.045	23	8	209	8	470	52.1	5.1	1	2	3	2	5	2	3	3	5	6	2	6	1		-2.73651	-2.44063	-2.02035	-1.43663	-1.57253	-1.59359	-0.918198	-1.27697	-2.10446
	0.822833	0.862654	1.81838	High	Q9BUA3	Spindlin interactor and repressor of chromatin-binding protein OS=Homo sapiens OX=9606	SPINDOC			1.03509	0.19211	4.443	5	1	11	1	381	41	5.01	1	1	2	1			1	2	1			1	1		-5.21299	-4.73206	-6.03703	-5.00022	-3.95797	-4.43592	-5.08659	-5.92836	-6.1917
	0.960902	0.855825	1.80979	High	Q99848	Probable rRNA-processing protein EBP2 OS=Homo sapiens OX=9606	EBNA1BP2			1.03392	0.192354	37.965	21	6	113	6	306	34.8	10.1	1						1	2		2			1		-2.9728	-3.04145	-2.74153	-2.86362	-1.53569	-1.789	-1.11662	-1.36762	-2.46606
	1.45809	0.828531	1.77588	High	Q9Y312	Protein AAR2 homolog OS=Homo sapiens OX=9606	AAR2			2.18853	0.0657323	5.051	5	1	10	1	384	43.4	5.96	1		1	2			1	1	1		1	1	1		-4.17756	-3.49606	-3.56694	-2.71477	-2.82689	-3.21329	-2.63668	-2.74802	-2.37462
	1.42988	0.825126	1.77169	High	O75155	Cullin-associated NEDD8-dissociated protein 2 OS=Homo sapiens OX=9606	CAND2			1.85211	0.086242	7.532	3	2	34	1	1236	135.2	5.68	3	1	1	3	2	4	5	4	1	3	2	2	1		-3.89575	-3.76163	-4.1547	-3.58016	-2.98813	-2.76841	-2.40128	-3.05601	-2.91099
	0.613852	0.818831	1.76398	High	Q92504	Zinc transporter SLC39A7 OS=Homo sapiens OX=9606	SLC39A7			0.516203	0.383169	15.172	18	3	20	3	469	50.1	6.87	1	3		1	2	1	2	2		1	2	2	1		-2.65761	-3.1144	-4.43399	-2.35739	-3.1281	-2.26402	-2.66246	-3.09054	-2.20926
	1.89032	0.810383	1.75368	High	P06703	Protein S100-A6 OS=Homo sapiens OX=9606	S100A6			1.7675	0.0926976	37.013	59	4	326	4	90	10.2	5.48	15	15	20	26	27	25	24	17	32	46	25	29	1	Met-loss+Acetyl [N-Term]	-0.476146	-0.054944	-0.568244	0.300967	0.383324	0.647524	0.663464	0.167865	0.121914
	0.677701	0.805191	1.74738	High	P83876	Thioredoxin-like protein 4A OS=Homo sapiens OX=9606	TXNL4A			0.815377	0.250655	28.576	33	3	35	3	142	16.8	5.85							1						1	Met-loss+Acetyl [N-Term]	-2.92817	-3.93417	-2.25964	-2.4408	-1.76961	-2.49601	-1.46349	-2.11434	-2.32514
	0.505923	0.804837	1.74695	High	P51809	Vesicle-associated membrane protein 7 OS=Homo sapiens OX=9606	VAMP7			0.450747	0.423893	6.865	14	2	19	2	220	24.9	8.6	1				1	2	1	2	1	1	1	2	1		-3.32231	-2.3531	-4.31349	-2.13775	-3.33514	-2.10151	-2.49247	-2.93444	-1.98628
	3.41395	0.798532	1.73933	High	Q9UPQ3	Arf-GAP with GTPase, ANK repeat and PH domain-containing protein 1 OS=Homo sapiens OX=9606	AGAP1			1.66249	0.102239	7.468	4	2	32	2	857	94.4	7.94	5	3	3	6	3	1	1	2	1	2	1	3	1		-2.2231	-2.26734	-2.37094	-1.48957	-1.58808	-1.38813	-1.24119	-2.10165	-1.44162
	2.12734	0.797305	1.73785	High	P00395	Cytochrome c oxidase subunit 1 OS=Homo sapiens OX=9606	MT-CO1	+	Cluster -67	3.02588	0.0495873	39.258	8	2	29	2	513	57	6.7		1						2	1		1		1		-3.22067	-3.27408	-3.05582	-2.66961	-2.29858	-2.19047	-2.2312	-2.33679	-2.16575
	0.255223	0.790053	1.72914	High	O00443	Phosphatidylinositol 4-phosphate 3-kinase C2 domain-containing subunit alpha OS=Homo sapiens OX=9606	PIK3C2A			0.118013	0.777142	7.448	1	2	4	2	1686	190.6	8.02													1		-5.86998	-3.80029	-7.09005	-6.33399	-4.0113	-4.04487	-4.54473	-5.92313	-4.74222
	1.38197	0.780718	1.71799	High	P10412	Histone H1.4 OS=Homo sapiens OX=9606	H1-4			0.744042	0.276373	76.381	27	9	1279	2	219	21.9	11.03	30	39	31	29	37	32	38	45	32	29	42	34	1	Met-loss+Acetyl [N-Term]	-1.82442	-2.25762	-2.29309	-1.77403	-1.08553	-1.17342	-2.04402	-0.722411	-1.68441
	2.78111	0.767749	1.70261	High	P61586	Transforming protein RhoA OS=Homo sapiens OX=9606	RHOA			2.61691	0.0566504	123.733	65	10	965	2	193	21.8	6.1	48	62	63	56	64	69	55	60	49	52	53	48	1		-1.45586	-1.21151	-1.31039	-0.675435	-0.424271	-0.574799	-0.195587	-0.69802	-0.152452
	1.02461	0.766893	1.7016	High	Q9H2H9	Sodium-coupled neutral amino acid symporter 1 OS=Homo sapiens OX=9606	SLC38A1			1.46166	0.125001	5.312	2	1	22	1	487	54	7.02												1	1		-3.95217	-3.03609	-3.09588	-2.93548	-2.28058	-2.56739	-2.45564	-2.36184	-2.39112
	2.08406	0.75815	1.69132	High	Q4VC31	Protein MIX23 OS=Homo sapiens OX=9606	MIX23			2.83112	0.0558161	7.055	14	2	13	2	144	16.6	7.81	1				2		3	1	1	3	1	1	1		-1.33271	-1.82517	-1.47548	-0.781375	-0.696066	-0.881464	-0.577765	-0.795753	-0.689575
	1.66369	0.757742	1.69084	High	Q15269	Periodic tryptophan protein 2 homolog OS=Homo sapiens OX=9606	PWP2			1.05469	0.188685	20.101	8	6	60	6	919	102.4	6.15													1		-4.32968	-4.79294	-4.1373	-3.57606	-3.60604	-3.80458	-3.37698	-3.94753	-4.34122
	1.01889	0.755727	1.68848	High	Q6UXV4	MICOS complex subunit MIC27 OS=Homo sapiens OX=9606	APOOL			0.875419	0.230475	23.254	32	5	71	5	268	29.1	9.52	6	8	3	4	6	2	3	6	5	3	3	2	1		-0.872893	0.0851603	-0.804219	0.332564	0.434755	-0.0920906	-0.667459	-0.0641165	-1.25411
	1.04902	0.754876	1.68749	High	P69905	Hemoglobin subunit alpha OS=Homo sapiens OX=9606	HBA2			1.15165	0.170096	34.876	28	3	309	3	142	15.2	8.68	11	7	7	12	14	11	15	21	14	12	7	14	1		0.300324	0.478408	0.951104	0.784987	1.52874	1.68073	0.747215	0.269956	0.671278
	0.256309	0.752541	1.68476	High	Q9UII2	ATPase inhibitor, mitochondrial OS=Homo sapiens OX=9606	ATP5IF1			0.122025	0.772894	75.513	11	4	1085	4	106	12.2	9.35	46	69	60	77	34	67	49	68	35	70	76	61	1		-1.75169	-1.56858	-0.84135	-1.99103	-1.52997	1.61701	-0.412663	-1.0372	-1.43206
	1.9494	0.744289	1.67515	High	Q8N6L1	Keratinocyte-associated protein 2 OS=Homo sapiens OX=9606	KRTCAP2	+	Cluster -67	3.48261	0.0372	8.132	13	1	51	1	136	14.7	9.61													1		-4.09652	-4.37372	-4.40404	-3.76096	-3.29578	-3.58466	-3.02782	-3.0306	-3.11015
	3.89571	0.74391	1.67471	High	Q15388	Mitochondrial import receptor subunit TOM20 homolog OS=Homo sapiens OX=9606	TOMM20	+	Cluster -67	3.90455	0.037	14.448	39	2	65	2	145	16.3	8.6		1		1	2	1	2	1	3	2	1	1	1		-2.09145	-2.19854	-2.13473	-1.46931	-1.39361	-1.33007	-1.02507	-1.37494	-1.11959
	2.14323	0.739939	1.67011	High	P13929	Beta-enolase OS=Homo sapiens OX=9606	ENO3	+	Cluster -67	3.84516	0.0418667	73.729	26	6	1130	2	434	47	7.71	37	58	45	49	46	51	52	67	47	58	59	53	1		2.83395	3.06476	2.90448	3.61646	3.92168	3.48486	4.34293	4.33581	4.15894
	4.61282	0.734098	1.66336	High	P04920	Anion exchange protein 2 OS=Homo sapiens OX=9606	SLC4A2			1.95146	0.0771606	10.648	5	3	14	3	1241	136.9	6.29	1	2	1	1		3	1		1		1	3	1		-3.19204	-3.24227	-3.17494	-2.45004	-2.52073	-2.43618	-2.51575	-2.52793	-3.11434
	0.999677	0.726936	1.65512	High	Q96CN9	GRIP and coiled-coil domain-containing protein 1 OS=Homo sapiens OX=9606	GCC1			0.934141	0.211065	9.745	6	2	4	2	775	87.8	5.45			2						2				1		-3.97145	-5.01868	-4.79234	-3.64513	-4.06997	-3.88657	-4.13478	-4.02149	-3.35792
	0.453666	0.723825	1.65156	High	Q9BXX3	Ankyrin repeat domain-containing protein 30A OS=Homo sapiens OX=9606	ANKRD30A			0.360965	0.500082	5.133	3	2	100	1	1397	158.7	6.48	3	5	2	4	3	5	4	4	2	3	4	3	1		-4.04972	-4.16075	-3.71727	-4.35667	-3.37044	-2.02915	-3.75342	-4.23203	-3.73247
	2.1651	0.720485	1.64774	High	Q9NS69	Mitochondrial import receptor subunit TOM22 homolog OS=Homo sapiens OX=9606	TOMM22	+	Cluster -67	3.28814	0.0381	60.37	58	5	425	5	142	15.5	4.34	10	12	9	8	8	10	14	14	17	19	14	19	1	Met-loss+Acetyl [N-Term]	0.542686	0.452363	0.428483	0.93641	1.25086	1.39771	1.67363	1.41931	1.72222
	0.439077	0.718351	1.6453	High	Q14676	Mediator of DNA damage checkpoint protein 1 OS=Homo sapiens OX=9606	MDC1			0.145567	0.738456	35.82	7	7	36	7	2089	226.5	5.47									1	2			1		-6.79709	-6.91257	-6.88598	-6.99267	-4.75594	-6.69198	-3.85173	-6.34194	-7.79898
	2.25362	0.695879	1.61987	High	Q9H0U3	Magnesium transporter protein 1 OS=Homo sapiens OX=9606	MAGT1			2.6421	0.0541488	5.323	7	2	52	2	335	38	9.63	4		2	2	2	3	5	2	3		7		1		0.748464	0.712321	0.718417	1.22163	1.6593	1.38591	1.7658	1.5608	1.35726
	3.34834	0.690029	1.61332	High	Q92922	SWI/SNF complex subunit SMARCC1 OS=Homo sapiens OX=9606	SMARCC1	+	Cluster -67	3.61347	0.0356923	82.568	19	13	220	8	1105	122.8	5.76	11	9	10	9	10	7	7	5	10	5	4	6	1		-1.34247	-1.28351	-1.33769	-0.584971	-0.754503	-0.554113	0.401308	-0.192576	0.264408
	1.6581	0.680831	1.60306	High	Q8NFF5	FAD synthase OS=Homo sapiens OX=9606	FLAD1			1.57602	0.110613	3.95	3	1	4	1	587	65.2	6.93				1		1		1	1				1		-5.52005	-5.55142	-6.07757	-5.0226	-5.1241	-4.95984	-4.84551	-5.06674	-5.39005
	1.23568	0.675707	1.59738	High	Q9NXS2	Glutaminyl-peptide cyclotransferase-like protein OS=Homo sapiens OX=9606	QPCTL			1.04402	0.190496	14.064	11	2	54	2	382	42.9	9.82	4	2	5	2	3	3	3	6	3	6	3	4	1		-2.02764	-1.27085	-1.27873	-0.924499	-0.881813	-0.743786	-0.899509	-1.29302	-0.533207
	0.226893	0.675444	1.59709	High	Q6UWH6	Protein TEX261 OS=Homo sapiens OX=9606	TEX261			0.0782427	0.841029	4.912	9	1	9	1	196	22.5	7.11	2						3		1		2		1		-5.20378	-5.08996	-7.72591	-4.45287	-4.64284	-6.89761	-5.25839	-4.37154	-6.97365
	0.570027	0.666457	1.58717	High	Q13601	KRR1 small subunit processome component homolog OS=Homo sapiens OX=9606	KRR1			0.499114	0.393243	18.411	15	4	57	4	381	43.6	9.77									1				1		-2.87865	-3.69952	-4.32745	-3.58305	-2.66305	-2.66014	-2.49717	-2.45758	-3.53998
	2.30871	0.636813	1.55489	High	P20339	Ras-related protein Rab-5A OS=Homo sapiens OX=9606	RAB5A			2.92318	0.0521053	56.08	47	7	761	4	215	23.6	8.15	34	39	28	34	31	39	41	42	45	41	37	38	1		-0.805291	-0.723275	-0.578376	-0.247039	0.0483303	0.0022068	0.131498	-0.117375	-0.00161934
	1.22252	0.629217	1.54673	High	Q9UBQ6	Exostosin-like 2 OS=Homo sapiens OX=9606	EXTL2			1.20051	0.160993	5.462	6	1	21	1	330	37.4	8.95		1			1	1	2	1	1	2	1	1	1		-4.49975	-4.62	-4.80078	-4.43466	-3.93254	-3.66568	-3.61236	-4.30921	-3.86897
	0.820428	0.622052	1.53906	High	Q96KR1	Zinc finger RNA-binding protein OS=Homo sapiens OX=9606	ZFR			1.22213	0.156992	85.21	18	13	202	13	1074	116.9	9.04									1	1			1		-2.85827	-3.30806	-2.40936	-2.69697	-1.91113	-2.10144	-1.55569	-2.18337	-1.91512
	1.13574	0.621837	1.53883	High	P16401	Histone H1.5 OS=Homo sapiens OX=9606	H1-5			1.06916	0.187109	56.516	23	7	669	7	226	22.6	10.92	16	15	9	18	16	16	16	24	13	12	20	18	1	Met-loss+Acetyl [N-Term]	2.85058	2.31092	2.55609	2.86444	3.14896	3.5697	2.83184	3.52765	3.41438
	0.695786	0.617736	1.53447	High	Q96CB9	5-methylcytosine rRNA methyltransferase NSUN4 OS=Homo sapiens OX=9606	NSUN4			0.28146	0.575715	6.054	7	2	5	2	384	43.1	8.18	1				1	1	1						1		-3.28688	-4.48034	-3.25553	-3.11948	-3.00469	-3.04538	-3.01243	-2.79553	-4.33779
	1.46795	0.617589	1.53431	High	Q96EY8	Corrinoid adenosyltransferase MMAB OS=Homo sapiens OX=9606	MMAB			1.53551	0.116179	12.44	16	3	47	3	250	27.4	8.6	3	3	4	3	3	3	3	3	5	3	3	2	1		-1.03043	-1.03452	-1.03602	-0.790912	-0.134346	-0.322941	-0.769716	-1.06201	-0.822733
	0.743705	0.617477	1.53419	High	P02042	Hemoglobin subunit delta OS=Homo sapiens OX=9606	HBD			0.780013	0.266922	4.771	6	1	16	1	147	16	8.05				1		1	2	2				1	1		-2.73344	-2.19613	-2.07013	-2.35699	-1.33989	-1.45039	-2.45926	-3.00134	-2.09128
	0.647927	0.61363	1.5301	High	P43007	Neutral amino acid transporter A OS=Homo sapiens OX=9606	SLC1A4			0.173703	0.7033	17.415	10	3	16	3	532	55.7	6.25	1				3	2				1		1	1		-3.54944	-3.13821	-3.73983	-2.16048	-2.92034	-3.50576	-2.51645	-2.50377	-4.58749
	1.05642	0.610828	1.52714	High	Q9UI42	Carboxypeptidase A4 OS=Homo sapiens OX=9606	CPA4			1.51405	0.117978	12.518	11	2	3	2	421	47.3	6.7					1					1		1	1		-3.78324	-3.73805	-3.01922	-2.75113	-2.83533	-3.12156	-3.61869	-3.6544	-3.74533
	0.807479	0.609175	1.52539	High	Q9Y3Q8	TSC22 domain family protein 4 OS=Homo sapiens OX=9606	TSC22D4			0.995838	0.20045	6.592	5	2	13	2	395	41	7.21	1	3	1	2		1		1		2		2	1		-2.23917	-2.47594	-1.33487	-1.42762	-1.44574	-1.3491	-1.30452	-1.38202	-1.3157
	1.35269	0.607091	1.52318	High	Q96LW7	Caspase recruitment domain-containing protein 19 OS=Homo sapiens OX=9606	CARD19			2.20483	0.063568	7.623	4	1	42	1	228	25.6	9.2			1	1		1	1	1	3	1	2	1	1		-3.73864	-3.56907	-3.46034	-3.36819	-2.81485	-2.76373	-2.37121	-2.62427	-2.76767
	0.940929	0.607029	1.52312	High	Q9BUJ0	Protein ABHD14A OS=Homo sapiens OX=9606	ABHD14A			1.29499	0.144236	5.608	6	1	4	1	271	29.7	8.5	1				1					1		1	1		-5.36464	-5.23805	-6.06669	-5.228	-4.93538	-4.6849	-4.75167	-4.88928	-4.78554
	0.969995	0.604017	1.51994	High	O43933	Peroxisome biogenesis factor 1 OS=Homo sapiens OX=9606	PEX1			0.664162	0.30736	7.245	2	2	10	2	1283	142.8	6.33			1		2	1	1	1	2	1		1	1		-3.73774	-3.67293	-4.55502	-3.30851	-3.32644	-3.51869	-3.65602	-4.209	-3.41823
	0.510296	0.598717	1.51437	High	P16455	Methylated-DNA--protein-cysteine methyltransferase OS=Homo sapiens OX=9606	MGMT			0.663056	0.307792	7.714	13	2	18	2	207	21.6	8.1	1	2	2	3		1	3	3	2			1	1		-3.09894	-3.75872	-3.93811	-3.28009	-2.12601	-3.59351	-3.84527	-3.81948	-3.7578
	0.935696	0.596033	1.51155	High	Q9NX63	MICOS complex subunit MIC19 OS=Homo sapiens OX=9606	CHCHD3			1.53964	0.115742	49.691	35	7	293	7	227	26.1	8.28	5	2	6	4	4	3	4	6	3	6	3	6	1		1.10721	1.50536	1.07436	1.41162	2.31524	1.74816	2.01402	2.14447	2.22282
	3.04334	0.594557	1.51001	High	P49916	DNA ligase 3 OS=Homo sapiens OX=9606	LIG3	+	Cluster -67	3.36952	0.0384	55.142	13	9	257	9	1009	112.8	9.01	4	6	2	4	5	3	5	4	5	7	3	5	1		-0.587802	-0.612535	-0.567878	0.0467825	-0.124191	0.092865	0.883305	0.333299	0.711782
	1.43279	0.593964	1.50939	High	Q96SB3	Neurabin-2 OS=Homo sapiens OX=9606	PPP1R9B			1.6896	0.100063	75.34	20	10	415	10	817	89.3	4.97	4	4	1	2	6	1	9	5	6	11	6	5	1		-1.1496	-1.60803	-1.69261	-1.05621	-0.879	-0.733141	-0.491392	-0.851424	-0.938929
	0.352071	0.592607	1.50797	High	Q9UDX5	Mitochondrial fission process protein 1 OS=Homo sapiens OX=9606	MTFP1			0.501184	0.392153	12.037	27	3	27	3	166	18	9.31			3	1	2	3	4	1	5	2	3	2	1		-4.13837	-2.55855	-2.27598	-2.46121	-1.69073	-3.04314	-1.95125	-2.05843	-2.11116
	0.493738	0.584984	1.50002	High	Q9H6K4	Optic atrophy 3 protein OS=Homo sapiens OX=9606	OPA3			0.228461	0.633464	6.218	17	1	8	1	179	20	8.91			1	1	1				2	1	1	1	1		-3.68579	-3.03069	-4.73821	-3.01502	-3.1904	-3.49432	-3.33487	-4.83454	-3.14725
	2.39283	0.582069	1.49699	High	Q12996	Cleavage stimulation factor subunit 3 OS=Homo sapiens OX=9606	CSTF3			1.99656	0.0745046	44.706	22	10	118	10	717	82.9	8.12	6	5	6	3	6	2	8	6	11	6	8	5	1		-0.500438	-0.679317	-0.599008	-0.173095	0.036911	0.103628	0.0368423	-0.0921278	-0.388865
	0.679983	0.580841	1.49572	High	Q702N8	Xin actin-binding repeat-containing protein 1 OS=Homo sapiens OX=9606	XIRP1			0.509887	0.387786	39.679	6	6	70	6	1843	198.4	6.15	1				1					1			1		-3.96105	-5.04384	-4.22609	-3.73917	-3.51764	-4.23164	-3.67024	-4.30543	-4.04937
	2.26401	0.573744	1.48838	High	P14406	Cytochrome c oxidase subunit 7A2, mitochondrial OS=Homo sapiens OX=9606	COX7A2			2.60681	0.057088	14.501	41	2	177	2	83	9.4	9.76	2	2	1	2	2	4	4	2	6	7	4	5	1		-0.686576	-0.873784	-0.644698	-0.237924	-0.240231	-0.00567055	0.260006	-0.117803	0.369953
	0.89343	0.573627	1.48826	High	O14494	Phospholipid phosphatase 1 OS=Homo sapiens OX=9606	PLPP1			1.10859	0.179059	11.621	14	3	47	3	284	32.1	7.97													1		-3.76959	-3.83238	-3.85062	-3.83126	-2.85934	-3.04111	-3.34427	-3.06757	-2.93303
	1.0015	0.572976	1.48759	High	Q05823	2-5A-dependent ribonuclease OS=Homo sapiens OX=9606	RNASEL			0.927752	0.2133	9.693	4	2	36	2	741	83.5	6.65	4	2	5	3	3	1	2	2	4	3	3	2	1		-3.65439	-3.35132	-3.82998	-3.43915	-3.03198	-2.64563	-3.34877	-2.98127	-2.61317
	1.57	0.566857	1.48129	High	Q8NCC3	Phospholipase A2 group XV OS=Homo sapiens OX=9606	PLA2G15			2.6743	0.0546316	4.067	3	1	6	1	412	46.6	6.73					1		1		1	2		1	1		-4.4373	-4.78148	-4.44362	-4.17848	-4.02008	-3.76327	-3.66358	-3.73709	-3.68876
	0.609232	0.56593	1.48034	High	P09884	DNA polymerase alpha catalytic subunit OS=Homo sapiens OX=9606	POLA1			0.433357	0.438813	10.269	3	3	23	3	1462	165.8	5.85	3	1	1	2	3	2	1	2	1	3	1	3	1		-2.75949	-2.43202	-2.8701	-1.77311	-2.9101	-1.68061	-2.15334	-2.91808	-2.60156
	0.501109	0.565462	1.47986	High	Q9Y2L5	Trafficking protein particle complex subunit 8 OS=Homo sapiens OX=9606	TRAPPC8			0.616665	0.32906	7.344	3	2	5	2	1435	160.9	6.87	1				1	2					1		1		-4.64889	-4.74058	-4.87151	-4.67044	-4.68364	-3.21052	-4.15298	-4.18567	-3.13995
	1.84166	0.564554	1.47893	High	Q9NY26	Zinc transporter ZIP1 OS=Homo sapiens OX=9606	SLC39A1			2.51885	0.0601429	7.434	14	2	15	2	324	34.2	5.92	1			1	1	1	2	1	2	2	2	2	1		-3.36649	-3.23876	-2.9799	-2.72316	-2.4812	-2.68714	-2.64005	-2.49529	-2.45857
	1.58448	0.562494	1.47682	High	Q96CW5	Gamma-tubulin complex component 3 OS=Homo sapiens OX=9606	TUBGCP3			2.39361	0.0594637	29.486	9	6	53	6	907	103.5	8.12	3	5	2	5	4	4	2	4	6	5	3	4	1		-0.848552	-1.32836	-0.831492	-0.431201	-0.453772	-0.435951	0.507149	-0.176251	0.188986
	1.23304	0.562422	1.47675	High	Q5VTL8	Pre-mRNA-splicing factor 38B OS=Homo sapiens OX=9606	PRPF38B			0.608286	0.331514	3.743	5	1	3	1	546	64.4	10.54	1		1								1		1		-4.72335	-4.52658	-5.1958	-4.1299	-4.40403	-4.22454	-4.55907	-4.51071	-5.87108
	2.25744	0.559982	1.47425	High	O15260	Surfeit locus protein 4 OS=Homo sapiens OX=9606	SURF4	+	Cluster -67	3.40153	0.0372121	40.399	21	5	496	5	269	30.4	7.78	13	12	13	12	34	37	40	37	34	47	36	44	1		1.75161	1.62182	1.88686	2.20733	2.29071	2.44219	2.5458	2.42638	2.53372
	1.47006	0.55581	1.46999	High	P68133	Actin, alpha skeletal muscle OS=Homo sapiens OX=9606	ACTA1			1.5556	0.113957	485.202	81	30	18237	4	377	42	5.39	861	866	805	912	780	791	834	792	714	692	875	725	1		2.66042	2.696	2.92671	3.08814	3.61047	3.25196	2.98347	2.8138	2.62838
	1.43501	0.542881	1.45688	High	Q9Y487	V-type proton ATPase 116 kDa subunit a 2 OS=Homo sapiens OX=9606	ATP6V0A2			1.7368	0.0945386	33.108	11	7	109	6	856	98	6.61										1			1		-2.14639	-2.40611	-2.12167	-1.93332	-1.41258	-1.69963	-1.55022	-1.8064	-1.61293
	2.69442	0.537608	1.45156	High	P0DP25	Calmodulin-3 OS=Homo sapiens OX=9606	CALM3	+	Cluster -67	3.21737	0.0383673	94.94	77	9	1071	9	149	16.8	4.22	21	25	22	22	36	53	43	52	47	59	48	58	1	Met-loss+Acetyl [N-Term]	2.98031	2.86839	2.99297	3.58619	3.36678	3.50153	4.11063	3.69963	4.10903
	1.07467	0.532348	1.44628	High	Q9NX58	Cell growth-regulating nucleolar protein OS=Homo sapiens OX=9606	LYAR			0.978784	0.203916	34.083	28	6	104	6	379	43.6	9.57	1			1		1	2	2	2	1	1		1		-2.86973	-2.84549	-2.46883	-2.57738	-1.95151	-2.05812	-1.70938	-1.63509	-2.53817
	0.907553	0.529255	1.44318	High	P08133	Annexin A6 OS=Homo sapiens OX=9606	ANXA6			1.05075	0.189365	741.093	81	61	17479	61	673	75.8	5.6	210	220	169	183	215	237	313	291	346	345	309	272	1		6.06646	5.53932	5.56032	5.84266	6.54453	6.36667	7.01831	6.44556	6.1538
	1.69283	0.528038	1.44197	High	Q9P0S9	Transmembrane protein 14C OS=Homo sapiens OX=9606	TMEM14C			2.43822	0.0628679	16.44	35	2	49	2	112	11.6	9.88		1	1	1	4	2	4	3	6	4	2	2	1		-0.483228	-0.464879	-0.067811	0.194097	0.257675	0.116425	0.671072	0.285865	0.569443
	0.820691	0.522816	1.43676	High	O43159	Ribosomal RNA-processing protein 8 OS=Homo sapiens OX=9606	RRP8			0.130818	0.759985	22.907	10	3	28	3	456	50.7	9.42										1			1		-4.07881	-3.94516	-3.84606	-3.82096	-2.87265	-3.60797	-3.15969	-2.98073	-6.06264
	1.10787	0.517253	1.43123	High	Q9UIV1	CCR4-NOT transcription complex subunit 7 OS=Homo sapiens OX=9606	CNOT7			1.4902	0.121568	8.04	7	2	32	2	285	32.7	4.84	2		1	1			3		1	2	1	2	1		-3.60164	-3.78692	-3.67103	-3.50412	-2.77436	-3.22935	-3.0234	-3.07516	-3.15478
	0.373459	0.51631	1.43029	High	Q9GZR7	ATP-dependent RNA helicase DDX24 OS=Homo sapiens OX=9606	DDX24			1.06498	0.187454	67.601	18	9	120	9	859	96.3	9.06				1			1		3	1			1		-1.74852	-1.88797	-2.76937	-2.44262	-0.769245	-1.64506	-0.465025	-1.21328	-0.552036
	0.697869	0.515738	1.42973	High	Q8N4A0	Polypeptide N-acetylgalactosaminyltransferase 4 OS=Homo sapiens OX=9606	GALNT4			0.618784	0.328204	9.756	5	2	27	1	578	66.6	7.61			1	1			1	1			1	1	1		-5.23832	-5.70617	-4.60115	-4.76631	-4.45724	-4.77487	-4.90571	-4.67922	-4.81542
	0.887364	0.515331	1.42932	High	O95139	NADH dehydrogenase [ubiquinone] 1 beta subcomplex subunit 6 OS=Homo sapiens OX=9606	NDUFB6			1.04507	0.19017	10.403	24	2	42	2	128	15.5	9.63	2	3	2	3		5	2	1	2	2	3	4	1		-2.00094	-2.39514	-2.57097	-2.11197	-1.90902	-1.40005	-1.88301	-1.65172	-1.77142
	0.799978	0.508684	1.42275	High	O76021	Ribosomal L1 domain-containing protein 1 OS=Homo sapiens OX=9606	RSL1D1			1.07296	0.186392	67.684	26	9	376	9	490	54.9	10.13	5	3		1		1	15	9	12	11	15	5	1		0.14079	-0.263741	0.0378771	-0.0538778	0.71841	0.776443	0.95056	0.963605	0.367025
	1.39435	0.500515	1.41472	High	P62304	Small nuclear ribonucleoprotein E OS=Homo sapiens OX=9606	SNRPE			2.43926	0.0631139	18.721	52	3	468	3	92	10.8	9.44	7	9	8	6	15	12	20	14	26	21	17	22	1		0.463708	0.5204	-0.00537395	0.85827	0.816391	0.805618	1.26036	1.0729	1.11437
	1.34044	0.500381	1.41459	High	Q96S97	Myeloid-associated differentiation marker OS=Homo sapiens OX=9606	MYADM			1.92129	0.079455	37.445	27	5	225	5	322	35.3	8.15		3	1	1		2	4	4	4	3	2	3	1		-0.971686	-1.26604	-0.97663	-0.687591	-0.282866	-0.742756	0.036726	-0.479218	-0.256554
	1.46738	0.50034	1.41455	High	P10619	Lysosomal protective protein OS=Homo sapiens OX=9606	CTSA			2.37933	0.0592826	74.168	21	7	265	7	480	54.4	6.61	10	11	12	8	11	10	11	12	14	9	12	11	1		1.1172	0.9919	0.854865	1.75542	1.42077	1.2888	2.09099	1.67416	2.10732
	2.11715	0.499825	1.41404	High	Q16891	MICOS complex subunit MIC60 OS=Homo sapiens OX=9606	IMMT			2.82664	0.0544889	260.892	47	29	2399	29	758	83.6	6.48	59	55	59	44	63	58	72	66	83	83	62	70	1		3.57628	3.49424	3.50301	3.83832	4.16556	4.06914	4.36666	4.12323	4.14154
	0.995796	0.498954	1.41319	High	Q9HAN9	Nicotinamide/nicotinic acid mononucleotide adenylyltransferase 1 OS=Homo sapiens OX=9606	NMNAT1			1.8936	0.0838526	30.464	34	6	94	6	279	31.9	8.87													1		-2.37201	-2.5349	-2.93546	-2.4444	-1.93334	-1.96776	-1.57799	-1.8577	-1.71305
	1.71645	0.498513	1.41276	High	P60468	Protein transport protein Sec61 subunit beta OS=Homo sapiens OX=9606	SEC61B			1.73736	0.0947113	8.783	22	2	240	2	96	10	11.56	9	8	7	5	9	7	6	7	6	7	8	8	1		0.630088	0.733027	0.991376	1.14532	1.40597	1.29874	1.13766	1.06102	1.35309
	0.918304	0.495303	1.40962	High	Q9H9P8	L-2-hydroxyglutarate dehydrogenase, mitochondrial OS=Homo sapiens OX=9606	L2HGDH			0.542845	0.367923	12.179	7	2	14	2	463	50.3	8.15	1			1	2		1	1	1			1	1		-3.43909	-3.25963	-2.71343	-2.89249	-2.53913	-2.49461	-2.73523	-3.36639	-2.6048
	0.432616	0.4952	1.40952	High	P30414	NK-tumor recognition protein OS=Homo sapiens OX=9606	NKTR			0.39183	0.471883	9.501	4	3	7	3	1462	165.6	9.99				1				1					1		1.30407	0.376645	0.532691	1.05826	0.649115	1.99164	0.961201	1.19905	2.22659
	0.455184	0.494651	1.40898	High	P09525	Annexin A4 OS=Homo sapiens OX=9606	ANXA4			0.506892	0.388632	153.331	58	15	1741	15	319	35.9	6.13	30	29	9	8	14	10	35	27	41	40	24	17	1		2.64885	1.66266	1.75921	1.84379	3.00302	2.70786	3.13799	2.72837	2.3191
	1.88332	0.490012	1.40446	High	O95298	NADH dehydrogenase [ubiquinone] 1 subunit C2 OS=Homo sapiens OX=9606	NDUFC2			2.69839	0.0554444	6.52	17	2	66	2	119	14.2	8.98	4	1	4	2	4	4	4	2	7	5	2	6	1		-0.457595	-0.579669	-0.406142	-0.0121489	0.196785	-0.158007	0.232712	0.2319	0.0555363
	1.16456	0.489741	1.40419	High	P07711	Procathepsin L OS=Homo sapiens OX=9606	CTSL			1.37719	0.13032	23.92	11	2	285	2	333	37.5	5.45	11	17	12	17	13	15	13	19	9	14	17	12	1		-0.242354	-0.562079	-0.678924	-0.281638	0.0403843	0.227119	0.178497	0.245681	-0.13765
	1.36089	0.489176	1.40364	High	P07196	Neurofilament light polypeptide OS=Homo sapiens OX=9606	NEFL			1.71674	0.0976571	39.682	22	9	1803	7	543	61.5	4.65	41	35	46	36	41	38	43	36	53	41	52	42	1		-2.94756	-2.58118	-2.54124	-2.29251	-2.32279	-1.98716	-1.63995	-2.16622	-2.01932
	0.447245	0.488323	1.40281	High	Q9H8Y8	Golgi reassembly-stacking protein 2 OS=Homo sapiens OX=9606	GORASP2			0.286466	0.571287	15.848	14	3	95	3	452	47.1	4.82	1	2	2	3	3	4	2	4	5	4	4	5	1		-1.21754	-1.29944	-1.48996	0.0414667	-1.51402	-1.06942	-1.04777	-1.36353	-0.855156
	0.848042	0.485329	1.3999	High	P14384	Carboxypeptidase M OS=Homo sapiens OX=9606	CPM			1.27741	0.146436	84.869	34	11	717	11	443	50.5	7.36	3	2	1	4	3	5	5	10	6	8	5	6	1		-0.922755	-1.59791	-1.19432	-1.11096	-0.553329	-0.594713	-0.54583	-0.277947	-0.677259
	0.711485	0.484648	1.39924	High	Q96R06	Sperm-associated antigen 5 OS=Homo sapiens OX=9606	SPAG5			0.769703	0.269225	30.794	10	6	32	6	1193	134.3	5			3	2	5	2	3	2	4	1	5	1	1		-2.90978	-2.24775	-2.91999	-2.19433	-1.8379	-2.59134	-2.16787	-2.28201	-2.15576
	1.13772	0.483804	1.39843	High	A5D8V6	Vacuolar protein sorting-associated protein 37C OS=Homo sapiens OX=9606	VPS37C			0.873209	0.231297	11.454	11	2	22	2	355	38.6	5.21		2	2	2	2	1	1	1	1	2		2	1		-4.41126	-4.61923	-4.02052	-3.96175	-3.67476	-3.96309	-3.63064	-4.14418	-4.1259
	0.51185	0.482997	1.39764	High	O43716	Glutamyl-tRNA(Gln) amidotransferase subunit C, mitochondrial OS=Homo sapiens OX=9606	GATC			0.364032	0.49754	11.679	21	2	23	2	136	15.1	5.05	2	2	1	3	2	2	1	2	1	1		1	1		-2.47	-2.65641	-2.47401	-2.40329	-2.51314	-1.235	-2.01871	-2.47388	-2.08397
	2.11616	0.476805	1.39166	High	Q9UDW1	Cytochrome b-c1 complex subunit 9 OS=Homo sapiens OX=9606	UQCR10			2.91548	0.0513846	15.229	38	2	133	2	63	7.3	9.47	7	4	4	5	6	3	6	7	7	6	6	6	1		-0.642291	-0.883288	-0.665612	-0.336871	-0.143063	-0.280842	0.0459938	-0.169147	0.106882
	0.449156	0.475575	1.39047	High	Q9NZZ3	Charged multivesicular body protein 5 OS=Homo sapiens OX=9606	CHMP5			0.371453	0.490933	16.765	29	3	58	3	219	24.6	4.83		3	3	2	1	3	3	4	3	3	4	2	1		-3.40776	-2.50706	-2.27661	-2.54281	-2.56181	-1.66009	-2.2249	-2.2938	-2.3767
	1.51055	0.473396	1.38837	High	O96008	Mitochondrial import receptor subunit TOM40 homolog OS=Homo sapiens OX=9606	TOMM40			1.97736	0.0763529	134.678	44	10	570	10	361	37.9	7.25	17	14	12	12	18	13	17	13	20	11	14	18	1		1.76864	1.54584	1.55163	1.88392	2.31648	2.08589	2.1625	2.05036	2.16693
	1.61833	0.470515	1.3856	High	Q99643	Succinate dehydrogenase cytochrome b560 subunit, mitochondrial OS=Homo sapiens OX=9606	SDHC			1.94769	0.0768579	19.946	17	2	117	2	169	18.6	9.69	6	9	7	7	6	7	9	6	11	12	9	10	1		-0.615226	-0.679957	-0.642091	-0.273416	-0.33783	0.085516	-0.0444756	-0.219989	0.156261
	1.58613	0.469645	1.38477	High	P42785	Lysosomal Pro-X carboxypeptidase OS=Homo sapiens OX=9606	PRCP			1.52014	0.118126	52.751	15	5	154	5	496	55.8	7.21	7	7	7	10	10	11	9	8	12	8	7	7	1		0.302022	0.598298	0.495488	1.07129	0.729424	1.00403	0.750851	0.430341	0.548296
	1.85957	0.468824	1.38398	High	O75438	NADH dehydrogenase [ubiquinone] 1 beta subcomplex subunit 1 OS=Homo sapiens OX=9606	NDUFB1			2.59722	0.0568189	31.859	69	3	153	3	58	7	8.92	5	4	3	3	5	3	6	3	9	9	5	10	1		0.165519	-0.0522394	0.0106802	0.420136	0.417519	0.692778	0.934406	0.597447	0.858072
	1.8888	0.467108	1.38234	High	Q9NRX5	Serine incorporator 1 OS=Homo sapiens OX=9606	SERINC1	+	Cluster -67	3.36297	0.0382222	10.18	8	3	46	3	453	50.5	5.85							3	1		3	1	1	1		-2.17904	-2.37834	-2.40979	-1.96046	-1.91175	-1.69364	-1.5108	-1.53186	-1.35507
	0.799106	0.465979	1.38125	High	Q5T0D9	Tumor protein p63-regulated gene 1-like protein OS=Homo sapiens OX=9606	TPRG1L			0.960279	0.207268	14.123	21	3	21	3	272	30.2	7.34	2	1	2	1	3	1	1	1	3	3	1	2	1		-3.6021	-2.75149	-2.93722	-2.48032	-2.73446	-2.6781	-2.5148	-2.67633	-2.53704
	0.714177	0.465662	1.38095	High	Q14978	Nucleolar and coiled-body phosphoprotein 1 OS=Homo sapiens OX=9606	NOLC1			0.327419	0.531418	13.282	4	2	87	2	699	73.6	9.47	3	3	4	5	3	2	3	3	5	4	4	1	1		-1.64111	-1.85597	-1.8977	-1.81785	-0.823948	-1.35599	-0.662697	-0.75841	-2.20586
	1.41515	0.462186	1.37763	High	O43181	NADH dehydrogenase [ubiquinone] iron-sulfur protein 4, mitochondrial OS=Homo sapiens OX=9606	NDUFS4			2.14954	0.0672959	24.723	29	3	212	3	175	20.1	10.3	6	5	5	7	10	6	8	6	12	6	8	10	1		0.214293	-0.2457	-0.231097	0.339734	0.38133	0.402988	0.617313	0.481177	0.5079
	0.713662	0.461083	1.37657	High	Q8N4H5	Mitochondrial import receptor subunit TOM5 homolog OS=Homo sapiens OX=9606	TOMM5			0.876609	0.230073	9.205	39	1	11	1	51	6	9.7	1				1	1		1	2	2	1	1	1		-4.25297	-4.47836	-4.4367	-4.48614	-3.53249	-3.76615	-3.18535	-3.26465	-4.17415
	1.57507	0.460173	1.37571	High	O14949	Cytochrome b-c1 complex subunit 8 OS=Homo sapiens OX=9606	UQCRQ			2.02519	0.0721143	3.646	16	1	41	1	82	9.9	10.08	1		3	1	1	3	2	2	2	4	3	2	1		-2.67722	-2.48073	-2.56412	-2.34909	-1.9428	-2.04966	-1.9844	-2.13782	-2.11987
	0.462722	0.460073	1.37561	High	Q15311	RalA-binding protein 1 OS=Homo sapiens OX=9606	RALBP1			0.659391	0.309349	5.239	4	1	7	1	655	76	5.88	2	1	1	1	1						1		1		-4.78596	-4.56072	-5.21341	-4.01917	-3.99819	-5.16253	-5.35846	-4.66079	-5.81509
	2.11226	0.458597	1.3742	High	O43676	NADH dehydrogenase [ubiquinone] 1 beta subcomplex subunit 3 OS=Homo sapiens OX=9606	NDUFB3			2.1529	0.0682452	8.265	21	2	66	2	98	11.4	9.2							1						1		-0.334941	-0.515254	-0.305095	-0.0523977	0.107124	0.165775	0.350691	-0.0341921	0.226313
	1.60054	0.457603	1.37326	High	Q9H330	Transmembrane protein 245 OS=Homo sapiens OX=9606	TMEM245			1.55194	0.114516	18.57	4	2	23	2	879	97.3	8.91	2	1	1	2	1	2	2	2	1	1	2	2	1		-2.04191	-2.11453	-1.88282	-1.76985	-1.39335	-1.50325	-1.74953	-1.51535	-1.32467
	1.44031	0.457491	1.37315	High	Q9UBU9	Nuclear RNA export factor 1 OS=Homo sapiens OX=9606	NXF1			0.855041	0.237872	75.163	30	12	186	12	619	70.1	8.51	3	1	2	4	2	2	2	2	3	3	2		1		-1.03997	-1.28742	-1.52229	-0.919036	-0.752434	-0.805737	-0.823969	-1.13009	-1.49763
	0.737025	0.45715	1.37283	High	P56181	NADH dehydrogenase [ubiquinone] flavoprotein 3, mitochondrial OS=Homo sapiens OX=9606	NDUFV3			0.679691	0.300932	18.665	34	2	32	2	108	11.9	9.7													1		-3.57602	-4.50087	-3.86681	-3.67641	-3.48745	-3.4084	-3.54408	-3.7314	-3.01434
	0.279908	0.453705	1.36955	High	Q13433	Zinc transporter ZIP6 OS=Homo sapiens OX=9606	SLC39A6			0.611199	0.330812	16.703	3	1	18	1	755	85	6.95	5			1	2		2		7			1	1		-6.9937	-7.54388	-8.12208	-8.19831	-6.32202	-6.77822	-9.47347	-8.00957	-7.70523
	0.502036	0.452716	1.36861	High	O95819	Mitogen-activated protein kinase kinase kinase kinase 4 OS=Homo sapiens OX=9606	MAP4K4			0.371111	0.491066	48.473	12	10	86	7	1239	142	7.46	3	8	5	8	6	7	1	4	2	2	3	3	1		-1.06168	-2.12729	-0.889485	-1.01945	-0.766756	-0.934099	-1.19877	-1.22331	-1.09249
	0.100715	0.452528	1.36844	High	P29375	Lysine-specific demethylase 5A OS=Homo sapiens OX=9606	KDM5A			0.343004	0.51546	15.03	2	3	16	3	1690	192	6.49											1		1		-3.15432	-0.98957	-4.56252	-4.91804	-1.23624	-1.19453	-3.11519	-4.9725	-4.68248
	1.37065	0.451074	1.36706	High	O15162	Phospholipid scramblase 1 OS=Homo sapiens OX=9606	PLSCR1			1.38828	0.128493	12.814	9	2	68	2	318	35	4.94	1	3	2	2	2	2	3	3	3	2	3	3	1		-2.58279	-2.14788	-2.14419	-1.93666	-1.81081	-1.77417	-1.75722	-0.901948	-1.6516
	0.623873	0.45089	1.36688	High	O94901	SUN domain-containing protein 1 OS=Homo sapiens OX=9606	SUN1			0.193563	0.676144	57.945	23	12	111	12	785	87.1	6.93													1		-4.09068	-3.68323	-4.70872	-3.84777	-3.83146	-3.45073	-4.37928	-4.4341	-3.02655
	1.3872	0.44998	1.36602	High	Q9NZJ7	Mitochondrial carrier homolog 1 OS=Homo sapiens OX=9606	MTCH1			1.98831	0.0748776	36.431	22	7	208	7	389	41.5	9.32	3	5	1	4	2	3	4	4	4	7	3	4	1		-0.43489	-0.581367	-0.229611	-0.188169	0.130905	0.161335	0.327381	0.0691252	0.217264
	2.89836	0.449753	1.36581	High	O95169	NADH dehydrogenase [ubiquinone] 1 beta subcomplex subunit 8, mitochondrial OS=Homo sapiens OX=9606	NDUFB8	+	Cluster -67	3.80519	0.0383529	25.414	26	4	227	4	186	21.8	6.8	6	5	3	5	6	5	11	9	14	10	10	9	1		-0.395736	-0.438399	-0.372416	-0.0348043	0.143929	0.0335827	0.336239	0.157851	0.195604
	0.34087	0.446835	1.36305	High	P49848	Transcription initiation factor TFIID subunit 6 OS=Homo sapiens OX=9606	TAF6			1.24073	0.154158	18.909	8	3	29	3	677	72.6	8.6			1				1		1	1			1		-4.5707	-5.55336	-5.4411	-4.81668	-3.93693	-5.47106	-3.69278	-3.93997	-3.86843
	0.271117	0.446824	1.36304	High	Q9UKG9	Peroxisomal carnitine O-octanoyltransferase OS=Homo sapiens OX=9606	CROT			0.391033	0.472222	26.508	15	6	71	6	612	70.1	7.08	5	5	5	5	10	7	7	3	6	7	4	6	1		-1.90252	-1.68067	-1.841	-0.0478315	-1.99135	-2.04453	-2.11436	-1.96971	-2.37395
	0.534127	0.445244	1.36154	High	O00418	Eukaryotic elongation factor 2 kinase OS=Homo sapiens OX=9606	EEF2K			0.382759	0.481014	6.226	4	2	3	2	725	82.1	5.33				1		1		1					1		-3.38543	-2.37347	-2.38789	-2.55673	-2.21105	-2.04327	-2.16064	-2.41044	-2.63062
	1.11285	0.44346	1.35986	High	O43390	Heterogeneous nuclear ribonucleoprotein R OS=Homo sapiens OX=9606	HNRNPR			1.22632	0.156215	214.929	44	24	2463	18	633	70.9	8.13	49	47	55	46	51	43	67	65	45	53	69	41	1		1.41168	1.00973	1.17385	1.3598	1.85241	1.71342	1.56259	1.71315	1.52603
	2.13736	0.442848	1.35928	High	O95210	Starch-binding domain-containing protein 1 OS=Homo sapiens OX=9606	STBD1			2.88171	0.05335	56.441	33	8	208	8	358	39	5.73	4	2	3	3	3	4	4	3	3	3	5	4	1		-0.168826	-0.317733	-0.152209	0.093152	0.327211	0.269411	0.246117	0.431726	0.35063
	0.695262	0.441514	1.35803	High	P60903	Protein S100-A10 OS=Homo sapiens OX=9606	S100A10			0.667695	0.306076	78.068	81	8	686	8	97	11.2	7.37	3	5				3	9	11	11	10	4	8	1		-0.486579	-0.749993	-0.873096	-0.792636	0.030901	-0.0233917	0.715748	-0.357125	-0.274706
	0.287017	0.441074	1.35761	High	Q8IUH4	Palmitoyltransferase ZDHHC13 OS=Homo sapiens OX=9606	ZDHHC13			0.321601	0.536907	4.517	3	1	5	1	622	70.8	8.07					1			2	2				1		-4.60907	-3.59798	-5.23841	-3.86331	-4.79752	-3.4614	-3.51914	-4.12382	-3.7889
	0.558216	0.440227	1.35682	High	Q9NY12	H/ACA ribonucleoprotein complex subunit 1 OS=Homo sapiens OX=9606	GAR1			0.68442	0.299398	14.681	13	2	39	2	217	22.3	10.92		1		1	1	1	2			1	1		1		-3.98118	-4.12593	-3.15769	-3.09664	-3.66556	-3.18191	-2.97494	-3.18412	-3.352
	1.15581	0.439992	1.3566	High	P62820	Ras-related protein Rab-1A OS=Homo sapiens OX=9606	RAB1A			2.04463	0.0717662	59.656	54	8	1297	2	205	22.7	6.21	68	62	69	56	59	69	71	51	67	63	60	62	1		-0.0905561	-0.336581	-0.559278	0.266791	-0.118309	0.185078	0.753216	0.298358	0.563984
	0.932246	0.439855	1.35647	High	P21589	5'-nucleotidase OS=Homo sapiens OX=9606	NT5E			1.26644	0.14837	276.857	45	20	1569	20	574	63.3	7.03	2		1		2	1	4	1	5	5	3	2	1		-0.0756483	0.287818	0.255658	0.225469	0.831978	0.729946	0.685463	0.670249	0.696627
	1.39691	0.439249	1.3559	High	P19256	Lymphocyte function-associated antigen 3 OS=Homo sapiens OX=9606	CD58			1.4772	0.123481	5.347	4	1	68	1	250	28.1	6.76								1		2			1		-2.98202	-3.03562	-3.36384	-2.84559	-2.55337	-2.66477	-2.32358	-2.83321	-2.42659
	1.99488	0.436838	1.35363	High	P05114	Non-histone chromosomal protein HMG-14 OS=Homo sapiens OX=9606	HMGN1			2.51987	0.060259	30.851	34	3	96	3	100	10.7	9.6	3	3	1	3	5	3	3	4	6	3	5	2	1		0.0650034	-0.132236	-0.0226259	0.364282	0.55493	0.301443	0.635292	0.710509	0.413895
	0.622556	0.434198	1.35116	High	Q9H0A8	COMM domain-containing protein 4 OS=Homo sapiens OX=9606	COMMD4			0.7478	0.274474	10.102	26	3	31	3	199	21.8	7.31	2	2	1	2	4	3		4	1	2	2	4	1		-2.52914	-3.16898	-2.52631	-2.28748	-2.71437	-1.91998	-2.15058	-2.40131	-1.95643
	1.88871	0.433359	1.35037	High	O75746	Electrogenic aspartate/glutamate antiporter SLC25A12, mitochondrial OS=Homo sapiens OX=9606	SLC25A12			2.56838	0.0564211	68.219	29	14	653	10	678	74.7	8.38	24	32	18	24	31	28	40	27	29	28	32	32	1		0.0553293	-0.0517588	-0.239776	0.256082	0.368418	0.439371	0.577553	0.368255	0.506947
	1.99502	0.433063	1.3501	High	P08670	Vimentin OS=Homo sapiens OX=9606	VIM			2.15118	0.0674868	876.272	88	63	61764	56	466	53.6	5.12	1124	1224	1328	1383	1470	1561	1686	1638	2032	2077	1756	1741	1		9.09881	9.30787	9.31339	9.55398	9.76603	9.69925	10.2538	9.79644	9.8212
	2.05493	0.432702	1.34976	High	O14880	Microsomal glutathione S-transferase 3 OS=Homo sapiens OX=9606	MGST3			2.40716	0.059977	133.453	53	6	395	6	152	16.5	9.38	13	12	13	13	19	17	21	17	23	17	18	21	1		1.06302	1.19547	1.00681	1.3984	1.64544	1.51956	2.11817	1.65157	1.78631
	1.64384	0.42856	1.34589	High	Q5H9U9	Probable ATP-dependent RNA helicase DDX60-like OS=Homo sapiens OX=9606	DDX60L			0.97634	0.204235	4.612	1	1	5	1	1706	197.5	8.29													1		-5.36767	-5.47603	-5.39449	-4.91847	-4.8272	-5.20684	-5.21525	-5.30681	-4.74183
	1.56428	0.425285	1.34284	High	Q13724	Mannosyl-oligosaccharide glucosidase OS=Homo sapiens OX=9606	MOGS			2.57897	0.0565538	121.067	30	15	498	15	837	91.9	8.9	33	34	21	27	35	36	28	33	29	34	30	40	1		2.03225	1.75441	1.87051	2.46467	2.13542	2.33293	2.96205	2.53428	2.90058
	1.07378	0.424844	1.34243	High	Q9H0U6	39S ribosomal protein L18, mitochondrial OS=Homo sapiens OX=9606	MRPL18			0.668605	0.305748	10.596	18	3	109	3	180	20.6	9.54	4	8	7	6	6	6	7	9	6	11	5	6	1		-0.941798	-1.22636	-0.7947	-0.813361	-0.52973	-0.345232	-0.822773	-1.02349	-0.406679
	1.37231	0.423845	1.3415	High	Q8N5K1	CDGSH iron-sulfur domain-containing protein 2 OS=Homo sapiens OX=9606	CISD2			0.957024	0.208194	8.172	15	2	94	2	135	15.3	9.61	6	7	9	3	6	8	6	6	9	7	7	7	1		0.293958	0.751098	0.467542	1.03809	0.880672	0.865368	1.00875	0.548207	1.10765
	0.8296	0.423165	1.34087	High	P46087	Probable 28S rRNA (cytosine(4447)-C(5))-methyltransferase OS=Homo sapiens OX=9606	NOP2			0.767714	0.269442	64.156	19	12	393	12	812	89.2	9.23	4	4	2	4	3	2	11	5	12	14	10	3	1		0.199895	0.0650873	0.288026	0.232133	1.01764	0.572735	1.10189	0.868999	0.310865
	1.14168	0.42178	1.33958	High	P31942	Heterogeneous nuclear ribonucleoprotein H3 OS=Homo sapiens OX=9606	HNRNPH3			1.7568	0.092743	146.321	51	10	596	10	346	36.9	6.87	11	8	8	8	11	5	11	10	10	7	11	11	1		0.0881319	-0.15215	0.164788	0.204736	0.4538	0.707575	0.526951	0.734588	0.657515
	3.31773	0.421194	1.33904	High	O75380	NADH dehydrogenase [ubiquinone] iron-sulfur protein 6, mitochondrial OS=Homo sapiens OX=9606	NDUFS6			2.39975	0.0597955	38.293	47	5	229	5	124	13.7	8.28	7	8	6	5	6	5	4	6	8	6	5	11	1		0.406787	0.329873	0.289144	0.752259	0.733145	0.803982	0.64127	0.93525	1.012
	0.321052	0.420987	1.33884	High	Q9H9G7	Protein argonaute-3 OS=Homo sapiens OX=9606	AGO3			0.150411	0.732336	9.376	5	3	51	1	860	97.3	9.11	3	3	6	1	1	2		2	1	3	1		1		-4.18499	-5.05499	-5.25653	-4.6821	-4.97447	-3.57697	-4.09118	-5.04452	-5.0201
	1.9218	0.420778	1.33865	High	Q969G5	Caveolae-associated protein 3 OS=Homo sapiens OX=9606	CAVIN3			2.03329	0.0717188	35.913	25	6	288	6	261	27.7	6.43						1	1	1		5		3	1		0.194921	0.202523	0.164203	0.417012	0.696165	0.710804	0.986147	0.558999	0.979256
	0.888958	0.419999	1.33793	High	Q8NC42	E3 ubiquitin-protein ligase RNF149 OS=Homo sapiens OX=9606	RNF149			0.46347	0.416714	4.855	6	1	7	1	400	43.1	6.54						1		1	2	1		2	1		-4.46229	-4.62212	-4.63867	-4.06378	-4.55995	-3.83935	-4.0803	-4.70018	-3.65209
	1.20282	0.419769	1.33771	High	P07477	Serine protease 1 OS=Homo sapiens OX=9606	PRSS1			1.46286	0.125039	15.642	8	1	144	1	247	26.5	6.51		3	2	1	2	1	2	2	2	6	2	6	1		-0.223197	-0.482984	-0.271461	-0.168349	0.124817	0.325199	0.272533	-0.00215626	0.318541
	0.924537	0.41946	1.33743	High	Q9NZK5	Adenosine deaminase 2 OS=Homo sapiens OX=9606	ADA2			0.446607	0.426956	3.758	2	1	4	1	511	58.9	7.91				1			1			1		1	1		-5.47069	-5.31782	-5.10363	-4.79965	-5.22725	-4.60686	-4.63463	-5.50689	-4.69127
	0.687753	0.419419	1.33739	High	P14866	Heterogeneous nuclear ribonucleoprotein L OS=Homo sapiens OX=9606	HNRNPL			0.592533	0.341208	247.891	50	16	1016	16	589	64.1	8.22	33	27	28	25	22	29	33	35	26	34	43	23	1		3.34311	3.19519	3.13449	3.15559	4.08985	3.68561	3.88656	4.03588	3.28714
	1.87987	0.414111	1.33248	High	O95168	NADH dehydrogenase [ubiquinone] 1 beta subcomplex subunit 4 OS=Homo sapiens OX=9606	NDUFB4	+	Cluster -67	3.27895	0.0368571	18.749	41	4	334	4	129	15.2	9.85	7	9	14	11	15	14	12	12	20	10	13	14	1		-0.154841	-0.157407	-0.167207	0.059659	0.343592	0.359627	0.55748	0.596375	0.469791
	0.815357	0.412766	1.33124	High	Q8IWR1	Tripartite motif-containing protein 59 OS=Homo sapiens OX=9606	TRIM59			0.641017	0.317241	5.143	5	1	11	1	403	47.1	6.81	2	1	3		3				2				1		-4.01706	-4.6481	-4.3375	-3.64848	-4.15446	-3.96141	-4.01977	-4.54316	-4.25172
	0.275136	0.412001	1.33053	High	P36404	ADP-ribosylation factor-like protein 2 OS=Homo sapiens OX=9606	ARL2			0.31593	0.542399	20.645	35	6	89	6	184	20.9	6.34	6	7	7	9	5	5	13	7	8	7	5	7	1		0.00640583	-1.12484	0.262355	-0.661723	0.251074	0.790573	0.0375843	0.526986	0.509327
	0.327215	0.410075	1.32875	High	Q9NYL2	Mitogen-activated protein kinase kinase kinase 20 OS=Homo sapiens OX=9606	MAP3K20			1.29831	0.144105	11.593	6	2	21	2	800	91.1	7.87	1			1	1		1					2	1		-3.52292	-4.83854	-3.3762	-3.72321	-3.05784	-3.72639	-4.50676	-5.75982	-5.00758
	1.02725	0.40837	1.32719	High	Q9UBN7	Histone deacetylase 6 OS=Homo sapiens OX=9606	HDAC6			1.23891	0.154086	7.449	3	2	4	2	1215	131.3	5.3	1		1				2						1		1.41649	1.05269	1.65715	1.65778	1.84555	1.8481	1.90348	1.71183	1.8323
	0.722433	0.405737	1.32477	High	Q9Y2R5	28S ribosomal protein S17, mitochondrial OS=Homo sapiens OX=9606	MRPS17			0.724942	0.284098	20.053	38	2	34	2	130	14.5	9.85	4	1	1		2	1	2	1	2	1	2	2	1		-2.0489	-1.4477	-2.07906	-1.56548	-1.14801	-1.64495	-1.54788	-1.08174	-1.51779
	1.62665	0.405723	1.32475	High	Q9P0J0	NADH dehydrogenase [ubiquinone] 1 alpha subcomplex subunit 13 OS=Homo sapiens OX=9606	NDUFA13			1.58265	0.109916	36.308	40	5	229	5	144	16.7	8.43	13	10	6	6	12	11	11	9	11	11	10	12	1		1.02907	0.955264	0.692939	1.28053	1.39393	1.21999	1.67675	1.18605	1.42533
	0.982819	0.403512	1.32272	High	A0A1B0GUL7	Protein kinase domain-containing protein OS=Homo sapiens OX=9606 PE=1 SV=1				0.572709	0.353849	35.764	14	4	175	1	405	45.2	6.54	12	11	10	10	11	12	13	15	13	14	13	12	1		-0.588336	-0.691815	-0.640027	-0.616694	-0.0396156	-0.0533333	-0.733631	-0.0230207	-0.152376
	1.60946	0.402596	1.32188	High	O95299	NADH dehydrogenase [ubiquinone] 1 alpha subcomplex subunit 10, mitochondrial OS=Homo sapiens OX=9606	NDUFA10			2.39472	0.059618	71.558	47	11	332	11	355	40.7	8.48	16	11	11	10	12	11	10	14	13	12	15	11	1		0.747685	0.746152	0.70189	0.90898	1.27073	1.2238	1.40181	1.2331	1.25258
	2.01701	0.399921	1.31944	High	Q8NBU5	Outer mitochondrial transmembrane helix translocase OS=Homo sapiens OX=9606	ATAD1			2.12685	0.0672518	38.23	25	6	61	6	361	40.7	6.9	3	1	2	2	4	1	3	4	6	4	1	4	1		0.247544	0.198501	0.113166	0.434926	0.67977	0.644278	0.739971	0.486493	0.795132
	0.520619	0.399487	1.31904	High	Q9Y3D5	28S ribosomal protein S18c, mitochondrial OS=Homo sapiens OX=9606	MRPS18C			0.994821	0.20041	5.314	13	1	18	1	142	15.8	9.55	1	1	1		1	1		1	1	3	1		1		-3.20309	-3.11634	-3.56421	-2.7494	-3.4861	-2.44967	-2.33581	-2.83984	-2.22714
	0.320915	0.398405	1.31805	High	Q6DKK2	Tetratricopeptide repeat protein 19, mitochondrial OS=Homo sapiens OX=9606	TTC19			0.707592	0.290719	13.272	9	2	13	2	380	42.4	5.77		3		1		1		2	2	1	2		1		-3.67172	-2.87206	-4.25517	-3.80661	-2.7551	-3.04203	-2.75875	-2.59572	-2.82949
	0.485635	0.3932	1.3133	High	P13611	Versican core protein OS=Homo sapiens OX=9606	VCAN			0.302229	0.554766	6.263	1	2	8	2	3396	372.6	4.51													1		-3.50589	-4.48271	-4.58506	-3.93972	-3.77558	-3.67877	-4.04521	-3.11542	-4.08787
	0.722613	0.393104	1.31322	High	Q96I59	Probable asparagine--tRNA ligase, mitochondrial OS=Homo sapiens OX=9606	NARS2			1.19772	0.161339	10.38	13	3	29	3	477	54.1	7.24		1	6	2	4		3	2	2	3	3	2	1		-2.30749	-1.50729	-2.1735	-1.57689	-1.5753	-1.65679	-1.40826	-1.40673	-1.36422
	2.54432	0.393051	1.31317	High	P27701	CD82 antigen OS=Homo sapiens OX=9606	CD82	+	Cluster -67	3.68688	0.0382	70.191	22	4	810	4	267	29.6	5.24	29	28	33	32	32	35	39	41	42	40	42	36	1		2.91126	2.84537	2.92321	3.17625	3.34858	3.33417	3.35999	3.47315	3.43225
	1.27944	0.39247	1.31264	High	P42356	Phosphatidylinositol 4-kinase alpha OS=Homo sapiens OX=9606	PI4KA			1.12542	0.175989	48.732	9	12	75	12	2102	236.7	7.06	2	1	3		1		1	1			1	2	1		0.421781	0.593114	0.135854	0.668344	0.824997	0.834818	0.718914	0.463778	0.756079
	1.8817	0.390235	1.31061	High	P45880	Voltage-dependent anion-selective channel protein 2 OS=Homo sapiens OX=9606	VDAC2			2.71329	0.0574902	107.57	57	13	2981	13	294	31.5	7.56	61	73	66	67	66	90	88	94	96	105	98	99	1		4.54424	4.32517	4.44181	4.69837	4.86388	4.91967	5.18943	4.93742	5.03213
	0.388437	0.387767	1.30837	High	Q8N1B4	Vacuolar protein sorting-associated protein 52 homolog OS=Homo sapiens OX=9606	VPS52			0.202896	0.66387	17.217	5	2	17	2	723	82.2	5.99	2	1	1	1	1		2	2	2	1	2	2	1		-2.69499	-3.22087	-3.5097	-2.63067	-2.22508	-3.40652	-3.84119	-2.25582	-3.73906
	1.43002	0.386115	1.30687	High	Q7Z5G4	Golgin subfamily A member 7 OS=Homo sapiens OX=9606	GOLGA7			1.72583	0.0963719	5.948	11	1	36	1	137	15.8	7.05													1		-4.91047	-5.02866	-5.04155	-4.70327	-4.74722	-4.37184	-4.63229	-4.54665	-4.32081
	1.23945	0.386084	1.30684	High	Q92614	Unconventional myosin-XVIIIa OS=Homo sapiens OX=9606	MYO18A			1.47138	0.123576	91.944	13	15	192	15	2054	233	6.3	4	2	5	5	4	5	8	6	6	4	4	3	1		5.75785	5.98235	6.07828	6.20226	6.54767	6.22681	6.85501	6.38567	6.40013
	1.12067	0.385736	1.30653	High	P08574	Cytochrome c1, heme protein, mitochondrial OS=Homo sapiens OX=9606	CYC1			1.74459	0.0942034	82.021	34	6	289	6	325	35.4	9	13	15	13	16	15	15	16	17	20	16	16	20	1		1.72809	1.81739	1.41043	1.9219	2.24659	1.94462	2.20141	2.26028	2.12418
	1.55914	0.382924	1.30398	High	Q96PK6	RNA-binding protein 14 OS=Homo sapiens OX=9606	RBM14			1.6414	0.105532	104.806	30	16	762	16	669	69.4	9.67	13	10	9	11	12	14	18	17	20	18	20	17	1		2.52027	2.40596	2.5976	2.74153	3.07651	2.85457	2.96666	2.80802	2.74506
	0.818609	0.38021	1.30153	High	Q99598	Translin-associated protein X OS=Homo sapiens OX=9606	TSNAX			1.0882	0.182989	24.865	23	5	43	5	290	33.1	6.55	4	2	4	8	3	4	3	6	4	3		2	1		5.84069	6.3256	6.31206	6.32662	6.81498	6.47739	7.03789	6.54011	6.66983
	1.6258	0.379779	1.30114	High	Q9NQ50	39S ribosomal protein L40, mitochondrial OS=Homo sapiens OX=9606	MRPL40			1.48423	0.122208	9.68	12	2	50	2	206	24.5	9.63	4	3	2	5	4	5	3	6	1	4	2	3	1		-1.62784	-1.78548	-1.82508	-1.34959	-1.52679	-1.22269	-1.30284	-1.45817	-0.96718
	1.15051	0.379372	1.30078	High	Q9H307	Pinin OS=Homo sapiens OX=9606	PNN			2.58585	0.0565271	71.551	21	11	168	11	717	81.6	7.14	3	4	1	1	2	1	3		3	3	1		1		-1.34891	-1.21553	-1.37201	-1.09147	-0.638683	-1.06818	-0.271925	-0.504704	-0.529959
	1.69295	0.379206	1.30063	High	Q9Y277	Voltage-dependent anion-selective channel protein 3 OS=Homo sapiens OX=9606	VDAC3			2.41694	0.0606627	86.306	50	11	1753	10	283	30.6	8.66	50	53	48	42	40	52	53	62	58	56	62	58	1	Met-loss+Acetyl [N-Term]	2.9235	2.70051	2.76758	3.02262	3.26607	3.24053	3.50314	3.26867	3.31784
	0.493829	0.378654	1.30013	High	O43808	Peroxisomal membrane protein PMP34 OS=Homo sapiens OX=9606	SLC25A17			1.03378	0.19225	4.68	6	1	12	1	307	34.5	10.08		1		1	1	1	1	1	2	2	1	1	1		-3.4602	-4.10933	-4.35163	-3.44993	-3.34023	-3.99504	-3.3426	-3.18594	-3.15072
	0.18018	0.376551	1.29823	High	Q9NPF5	DNA methyltransferase 1-associated protein 1 OS=Homo sapiens OX=9606	DMAP1			0.0751784	0.845147	12.462	10	3	10	3	467	53	9.5													1		-5.47708	-5.69938	-5.13654	-5.5165	-6.12179	-3.54506	-5.02185	-5.33887	-5.12211
	1.81638	0.375313	1.29712	High	P21796	Voltage-dependent anion-selective channel protein 1 OS=Homo sapiens OX=9606	VDAC1	+	Cluster -67	2.99705	0.0487059	158.284	73	17	5753	16	283	30.8	8.54	97	117	120	115	127	126	156	156	170	172	161	164	1	Met-loss+Acetyl [N-Term]	5.31366	5.21683	5.19481	5.46451	5.75735	5.62938	5.91619	5.77738	5.82554
	1.46622	0.374993	1.29683	High	P48509	CD151 antigen OS=Homo sapiens OX=9606	CD151			1.06131	0.187563	9.609	8	2	229	2	253	28.3	7.47	9	7	10	11	11	9	9	8	10	9	10	9	1		2.04508	2.13855	2.22549	2.30266	2.65359	2.57786	2.49838	2.67743	2.20661
	2.05454	0.372041	1.29418	High	Q9NX14	NADH dehydrogenase [ubiquinone] 1 beta subcomplex subunit 11, mitochondrial OS=Homo sapiens OX=9606	NDUFB11			2.94266	0.0536111	15.824	15	1	76	1	153	17.3	5.22	4	3	4	3	5	4	3	3	5	4	3	3	1		0.545712	0.550656	0.680989	0.836219	1.02807	1.0292	1.01004	1.13369	1.06733
	0.770447	0.370864	1.29313	High	Q9Y496	Kinesin-like protein KIF3A OS=Homo sapiens OX=9606	KIF3A			0.628438	0.323571	4.603	3	1	8	1	699	80	6.54	2			1	1	1			1	1		1	1		-6.06246	-6.02315	-5.92323	-5.26054	-6.01468	-5.62102	-5.88817	-5.70145	-5.43567
	2.47992	0.370008	1.29236	High	O00754	Lysosomal alpha-mannosidase OS=Homo sapiens OX=9606	MAN2B1			2.22648	0.0629421	37.023	9	6	187	6	1011	113.7	7.28	10	14	12	12	16	13	15	15	11	14	11	11	1		0.0505266	-0.0209436	-0.0431929	0.459546	0.280634	0.356234	0.234505	0.429523	0.205099
	1.79553	0.367855	1.29043	High	O75947	ATP synthase subunit d, mitochondrial OS=Homo sapiens OX=9606	ATP5PD			2.31635	0.0594123	47.861	49	7	467	7	161	18.5	5.3	31	24	30	32	25	29	30	30	33	28	18	40	1		4.3711	4.35276	4.36554	4.67844	4.60527	4.90925	5.12455	4.86122	4.8277
	1.43134	0.367551	1.29016	High	Q9UBI6	Guanine nucleotide-binding protein G(I)/G(S)/G(O) subunit gamma-12 OS=Homo sapiens OX=9606	GNG12			0.865638	0.233647	33.831	44	3	136	3	72	8	8.97	4	5	3	2	2	1	2	3	6	3	3	2	1		-1.15974	-1.03305	-1.21579	-0.884429	-0.55588	-0.865625	-0.726225	-0.664535	-1.16719
	2.0533	0.365136	1.288	High	P17661	Desmin OS=Homo sapiens OX=9606	DES			1.78229	0.0917642	441.02	73	35	13896	31	470	53.5	5.27	227	261	274	276	294	311	315	328	395	396	358	349	1		6.72895	6.91809	6.91007	7.13993	7.29667	7.21591	7.78722	7.24267	7.37465
	1.61175	0.363792	1.2868	High	Q9Y6K5	2'-5'-oligoadenylate synthase 3 OS=Homo sapiens OX=9606	OAS3			2.2294	0.0625	6.879	2	2	15	2	1087	121.1	8.4	1	2	1	1	1	1	1	1		1		1	1		-3.49771	-3.38072	-3.50364	-3.27652	-3.06223	-2.95195	-2.86215	-3.07496	-2.96274
	0.280623	0.363251	1.28632	High	Q9H6R4	Nucleolar protein 6 OS=Homo sapiens OX=9606	NOL6			0.568614	0.355681	27.813	10	6	57	6	1146	127.5	7.64													1		-4.8724	-3.96699	-4.31911	-4.89997	-3.41394	-3.75483	-2.79934	-2.64047	-4.39188
	1.62278	0.362623	1.28576	High	Q8NE86	Calcium uniporter protein, mitochondrial OS=Homo sapiens OX=9606	MCU			2.43144	0.0622716	29.256	19	5	173	5	351	39.8	8.65	3	6	5	6	5	9	8	6	9	13	8	9	1		-0.368094	-0.319264	-0.532079	-0.20259	0.03825	0.0327702	0.176662	0.0564871	0.0462189
	1.53144	0.362204	1.28539	High	Q16795	NADH dehydrogenase [ubiquinone] 1 alpha subcomplex subunit 9, mitochondrial OS=Homo sapiens OX=9606	NDUFA9			2.58758	0.0565937	70.836	39	11	781	11	377	42.5	9.8	34	29	27	25	33	31	38	35	47	32	31	42	1		1.90187	1.85738	1.75063	2.00695	2.34038	2.24916	2.53615	2.39141	2.37852
	0.627486	0.36202	1.28522	High	Q567U6	Coiled-coil domain-containing protein 93 OS=Homo sapiens OX=9606	CCDC93			1.05169	0.189326	9.936	4	2	36	2	631	73.2	8.15	2	4	3	3	5	2	3	4	4	2	2	2	1		-2.75071	-2.7208	-2.74735	-2.16001	-2.07826	-2.89453	-2.936	-2.97357	-2.94147
	1.02706	0.36154	1.2848	High	P00414	Cytochrome c oxidase subunit 3 OS=Homo sapiens OX=9606	MT-CO3			0.438329	0.434244	5.062	3	1	4	1	261	29.9	7.31													1		-4.28578	-4.44627	-4.81031	-4.19048	-4.22658	-4.04068	-4.0245	-4.65079	-3.31687
	1.07184	0.3608	1.28414	High	P61421	V-type proton ATPase subunit d 1 OS=Homo sapiens OX=9606	ATP6V0D1			1.0672	0.187455	43.061	28	7	203	7	351	40.3	5	5	3	4	4	5	3	4	3	8	5	3	7	1		-0.0943785	-0.0779791	-0.541848	0.0821371	0.210754	0.0753021	0.429031	0.108245	0.012392
	1.99276	0.36035	1.28374	High	Q15149	Plectin OS=Homo sapiens OX=9606	PLEC			1.95954	0.0773675	2587.42	58	248	37336	247	4684	531.5	5.96	717	735	809	821	817	902	999	958	1250	1242	1029	1065	1		7.68783	7.81488	7.86509	8.04366	8.24487	8.16032	8.70815	8.24727	8.28439
	1.57561	0.360258	1.28366	High	Q9UJZ1	Stomatin-like protein 2, mitochondrial OS=Homo sapiens OX=9606	STOML2			1.60654	0.108813	90.172	37	10	536	10	356	38.5	7.39	28	16	23	31	29	24	21	29	24	24	23	25	1		2.16728	2.29853	2.52214	2.657	2.71742	2.69432	2.77519	2.55163	2.87765
	2.05408	0.36004	1.28346	High	Q12906	Interleukin enhancer-binding factor 3 OS=Homo sapiens OX=9606	ILF3			2.92882	0.0521067	382.179	52	30	2918	25	894	95.3	8.76	61	58	63	60	50	69	49	62	65	65	63	72	1		3.57872	3.34578	3.5558	3.83765	3.8816	3.84117	4.44622	4.07114	4.26617
	2.32927	0.358788	1.28235	High	Q99439	Calponin-2 OS=Homo sapiens OX=9606	CNN2	+	Cluster -67	3.77124	0.0362222	57.6	45	8	382	7	309	33.7	7.33	23	23	29	28	28	22	23	18	17	24	23	20	1		2.40419	2.227	2.38453	2.64303	2.70892	2.74014	3.0376	2.8937	3.0337
	1.77098	0.357826	1.28149	High	Q6NUK1	Calcium-binding mitochondrial carrier protein SCaMC-1 OS=Homo sapiens OX=9606	SLC25A24			1.56138	0.112916	64.598	32	12	567	12	477	53.3	6.33	21	26	29	27	33	37	29	33	29	34	34	38	1		2.21281	2.07902	2.22945	2.51005	2.40977	2.67496	2.6686	2.37866	2.80163
	1.72036	0.356735	1.28052	High	Q9Y6M9	NADH dehydrogenase [ubiquinone] 1 beta subcomplex subunit 9 OS=Homo sapiens OX=9606	NDUFB9			2.05981	0.0703366	23.175	39	6	270	6	179	21.8	8.38	7	9	5	9	10	5	16	12	14	14	12	7	1	Met-loss+Acetyl [N-Term]	-0.385749	-0.538491	-0.654202	-0.247458	-0.0696907	-0.19109	0.0889874	-0.2023	-0.0360222
	0.892071	0.355036	1.27902	High	Q9NUN5	Lysosomal cobalamin transport escort protein LMBD1 OS=Homo sapiens OX=9606	LMBRD1			0.30939	0.549043	5.37	3	1	10	1	540	61.3	7.77	1					1	2	2	1	1		1	1		-0.933005	-1.34516	-1.55108	-0.975707	-0.849438	-0.938993	-0.565552	-1.55714	-1.16613
	0.744842	0.354081	1.27817	High	P13987	CD59 glycoprotein OS=Homo sapiens OX=9606	CD59			1.73451	0.0943485	29.911	25	4	718	4	128	14.2	6.48	14	13	10	13	13	14	21	16	19	17	21	20	1		1.56904	1.13188	1.24872	1.33109	1.91201	1.76879	2.12223	2.12829	1.95538
	0.356115	0.35317	1.27736	High	Q4G0F5	Vacuolar protein sorting-associated protein 26B OS=Homo sapiens OX=9606	VPS26B			0.805124	0.255578	21.206	13	2	43	2	336	39.1	7.36	3	3	4	5	4	6	5	3	2	2	3	3	1		-1.96744	-2.99004	-2.09522	-1.81245	-1.67211	-2.50862	-2.99403	-2.4564	-3.05357
	0.807281	0.351911	1.27625	High	Q53T59	HCLS1-binding protein 3 OS=Homo sapiens OX=9606	HS1BP3			1.18425	0.163025	12.817	9	3	55	3	392	42.8	5.01	6	6	1	4	4	2	5	5	3	3	2	5	1		-0.851245	-1.32797	-0.921849	-0.944503	-0.487242	-0.613585	-0.650589	-0.454955	-0.504042
	0.675301	0.349738	1.27433	High	Q96GC5	39S ribosomal protein L48, mitochondrial OS=Homo sapiens OX=9606	MRPL48			0.794872	0.259805	10.503	16	3	23	3	212	23.9	8.98	2		2	2	3	2	1	2	2	3	1	1	1		-2.06321	-1.95931	-2.70491	-1.9272	-1.83116	-1.91986	-1.89366	-1.83557	-1.80686
	0.724914	0.349298	1.27394	High	Q7LGA3	Heparan sulfate 2-O-sulfotransferase 1 OS=Homo sapiens OX=9606	HS2ST1			1.19797	0.161467	16.442	13	4	78	4	356	41.9	8.69	8	5	4	5	5	3	2	2	8	5	2	3	1		-1.13886	-1.05698	-1.61141	-0.836308	-0.735432	-1.18762	-0.761856	-0.769734	-0.646667
	1.37536	0.349286	1.27393	High	Q8NFV4	Protein ABHD11 OS=Homo sapiens OX=9606	ABHD11			1.69579	0.0998648	15.472	11	3	90	3	315	34.7	9.48	8	8	9	5	10	9	7	5	5	9	10	5	1		-0.740001	-0.767663	-0.617337	-0.477235	-0.45899	-0.140919	-0.409357	-0.381034	-0.326731
	0.522742	0.348848	1.27354	High	Q969X1	Protein lifeguard 3 OS=Homo sapiens OX=9606	TMBIM1			0.355153	0.504598	3.973	4	1	44	1	311	34.6	7.72									1				1	Met-loss+Acetyl [N-Term]	-4.7278	-4.01033	-4.66614	-4.02038	-3.86425	-4.4731	-4.1514	-4.27084	-4.51453
	1.70248	0.348068	1.27285	High	Q15042	Rab3 GTPase-activating protein catalytic subunit OS=Homo sapiens OX=9606	RAB3GAP1	+	Cluster -67	3.25409	0.0348696	32.412	13	9	110	9	981	110.5	5.55	15	10	5	7	5	10	11	11	7	5	13	10	1		0.476117	0.271497	0.581279	0.768279	0.778837	0.825979	1.24251	1.17188	1.05869
	0.682172	0.346636	1.27159	High	P12074	Cytochrome c oxidase subunit 6A1, mitochondrial OS=Homo sapiens OX=9606	COX6A1			1.01852	0.19664	19.087	43	2	97	2	109	12.1	9.32	8	1	7	2	6	3	6	3	7	4	6	10	1		1.80394	1.89439	1.29276	1.91423	2.27734	1.83943	2.28324	2.26621	2.02209
	1.26933	0.34621	1.27122	High	Q15648	Mediator of RNA polymerase II transcription subunit 1 OS=Homo sapiens OX=9606	MED1			1.93186	0.0787288	8.334	2	2	87	2	1581	168.4	8.73	3	3	4	5	4	4	5	1	5	4	1	5	1		-2.5913	-2.74478	-2.95828	-2.5171	-2.45807	-2.28057	-2.09714	-2.36992	-2.07895
	0.204727	0.346087	1.27111	High	O43677	NADH dehydrogenase [ubiquinone] 1 subunit C1, mitochondrial OS=Homo sapiens OX=9606	NDUFC1			0.464603	0.415694	4.955	36	1	8	1	76	8.7	10.2		1					1	1	1	1	1		1		-3.62134	-5.18976	-5.20128	-4.75029	-4.67495	-3.54887	-4.31347	-3.00037	-3.77067
	0.352279	0.345858	1.27091	High	Q13541	Eukaryotic translation initiation factor 4E-binding protein 1 OS=Homo sapiens OX=9606	EIF4EBP1			1.73535	0.094395	15.232	22	1	4	1	118	12.6	5.48	1	1							1				1		-5.10607	-3.92691	-3.87943	-3.82806	-3.96197	-4.08481	-2.68586	-3.06996	-3.04748
	0.426074	0.345682	1.27075	High	Q9NRG7	Epimerase family protein SDR39U1 OS=Homo sapiens OX=9606	SDR39U1			0.628785	0.323572	4.631	5	1	16	1	293	31.1	9.04	1	1	1	2	1	3			1	2	2	2	1		-4.4007	-3.79717	-3.30633	-3.38908	-3.76754	-3.31054	-3.19551	-3.52076	-3.01713
	1.79464	0.345552	1.27064	High	P13073	Cytochrome c oxidase subunit 4 isoform 1, mitochondrial OS=Homo sapiens OX=9606	COX4I1			2.39361	0.0591333	45.374	43	7	844	7	169	19.6	9.51	25	29	30	31	31	28	42	39	40	36	34	46	1		3.3262	3.39358	3.31777	3.54722	3.8342	3.69279	3.87501	3.69542	3.78381
	1.96239	0.343495	1.26883	High	O75306	NADH dehydrogenase [ubiquinone] iron-sulfur protein 2, mitochondrial OS=Homo sapiens OX=9606	NDUFS2			2.72094	0.05808	146.272	54	16	848	16	463	52.5	7.55	37	29	31	23	25	32	39	41	38	35	40	39	1		2.22693	2.06774	2.09152	2.36141	2.49643	2.55883	2.77507	2.54451	2.66212
	0.765228	0.343239	1.2686	High	P17252	Protein kinase C alpha type OS=Homo sapiens OX=9606	PRKCA			1.12965	0.175574	105.078	27	11	506	10	672	76.7	7.05	12	13	10	11	11	12	13	12	13	15	11	11	1	Met-loss+Acetyl [N-Term]	0.17002	-0.0866003	-0.343347	-0.0190039	0.323771	0.465025	0.466753	0.339536	0.369192
	0.918059	0.342002	1.26751	High	Q96L58	Beta-1,3-galactosyltransferase 6 OS=Homo sapiens OX=9606	B3GALT6			1.24729	0.153252	13.738	15	3	99	3	329	37.1	9.66	2		1	2	3	1	7	2	1	1	2	3	1		-2.73806	-3.1688	-2.76624	-2.72968	-2.54965	-2.36775	-2.22828	-2.60197	-2.08691
	0.385326	0.341973	1.26749	High	Q9Y3D0	Cytosolic iron-sulfur assembly component 2B OS=Homo sapiens OX=9606	CIAO2B			0.246557	0.613166	22.514	26	2	141	2	163	17.7	5.19	11	14	10	13	12	15	10	9	8	10	10	11	1		-0.248403	-0.55915	-1.48513	-0.417096	-0.355724	-0.493938	-0.522121	-0.575442	-0.637783
	1.30145	0.341819	1.26735	High	Q9BYC5	Alpha-(1,6)-fucosyltransferase OS=Homo sapiens OX=9606	FUT8			1.1798	0.163378	10.509	7	2	25	2	575	66.5	7.66	1	1	2	2	1	3	1	2	4	3	2	2	1		-2.8295	-2.4859	-2.83178	-2.46057	-2.34438	-2.31678	-2.35415	-2.47466	-2.61339
	1.80155	0.341042	1.26667	High	Q8N983	39S ribosomal protein L43, mitochondrial OS=Homo sapiens OX=9606	MRPL43			2.43237	0.062975	21.714	27	4	175	4	215	23.4	8.65	15	11	14	13	13	9	12	9	12	9	14	10	1		0.845662	0.805362	1.0438	1.24134	1.16592	1.31069	1.70255	1.33481	1.61532
	0.991627	0.340876	1.26653	High	P11234	Ras-related protein Ral-B OS=Homo sapiens OX=9606	RALB			1.44268	0.125494	40.748	40	6	238	2	206	23.4	6.62	11	8	8	10	16	16	11	18	12	11	11	20	1		-0.838069	-1.05697	-0.823752	-0.590339	-0.79867	-0.307159	-0.363609	-0.549481	-0.386328
	1.48917	0.338913	1.2648	High	Q6P1A2	Lysophospholipid acyltransferase 5 OS=Homo sapiens OX=9606	LPCAT3			1.20213	0.161186	9.798	7	3	27	3	487	56	8.69	3	3	2	1	3	1	4	2	1	2	2	3	1		-1.80865	-1.94896	-1.83882	-1.7069	-1.37738	-1.49541	-1.66892	-1.90764	-1.6148
	1.39028	0.338842	1.26474	High	Q03135	Caveolin-1 OS=Homo sapiens OX=9606	CAV1			1.78163	0.0914673	101.862	62	10	1151	9	178	20.5	6.02	36	34	32	25	27	36	38	36	40	37	33	42	1	Met-loss+Acetyl [N-Term]	3.5425	3.3996	3.20426	3.64427	3.68497	3.83365	4.22276	3.84583	3.82995
	0.334968	0.338277	1.26425	High	Q6NXR4	TELO2-interacting protein 2 OS=Homo sapiens OX=9606	TTI2			0.191865	0.678252	5.48	3	1	23	1	508	56.9	7.09	1	3		1	2	4	1	3	2	1	1	4	1		-3.58331	-3.88748	-4.2101	-3.66239	-4.14526	-2.85842	-3.36963	-4.15259	-2.93203
	0.303037	0.337639	1.26369	High	O76061	Stanniocalcin-2 OS=Homo sapiens OX=9606	STC2			0.131654	0.758746	37.484	25	4	90	4	302	33.2	7.3	3	6	3	5	4	4	6	4	4	4	4	9	1		-2.01816	-1.9525	-0.686383	-1.46784	-1.01937	-1.15692	-1.80855	-1.33424	-0.92705
	1.14168	0.336849	1.263	High	Q86Y39	NADH dehydrogenase [ubiquinone] 1 alpha subcomplex subunit 11 OS=Homo sapiens OX=9606	NDUFA11			0.946562	0.209333	27.044	47	4	217	4	141	14.8	8.72	8	7	6	5	7	7	5	10	13	10	8	7	1		-0.662971	-0.909688	-0.948472	-0.650573	-0.562525	-0.297485	-0.17804	-0.480706	-0.695225
	1.8681	0.336706	1.26287	High	P19367	Hexokinase-1 OS=Homo sapiens OX=9606	HK1			2.28969	0.0605091	257.934	42	29	3703	26	917	102.4	6.8	76	85	84	69	84	98	111	101	123	129	105	109	1		4.26538	4.15305	4.26934	4.42777	4.65688	4.61323	4.9596	4.62015	4.76097
	2.35471	0.336428	1.26263	High	Q53EP0	Fibronectin type III domain-containing protein 3B OS=Homo sapiens OX=9606	FNDC3B			2.46433	0.0625359	21.734	7	6	54	6	1204	132.8	5.95	5	4	2	6	5	4	2	3	4	2	5		1		-1.08751	-0.974486	-1.08442	-0.763339	-0.750389	-0.623405	-0.61829	-0.377498	-0.665993
	1.01901	0.335541	1.26185	High	O75122	CLIP-associating protein 2 OS=Homo sapiens OX=9606	CLASP2			0.292401	0.563809	37.728	9	8	97	6	1294	141	8.4	8	4	8	10	10	3	11	4	10	5	8	3	1		-0.796184	-1.12495	-1.0044	-0.87445	-0.470692	-0.573772	-1.00221	-0.379048	-2.12301
	0.853179	0.335297	1.26164	High	P36269	Glutathione hydrolase 5 proenzyme OS=Homo sapiens OX=9606	GGT5			0.469851	0.413124	8.987	4	2	35	2	586	62.2	7.55	1	2	1	1	1		1	1	2	1	2	2	1		-3.77036	-4.0766	-4.1374	-3.69188	-3.88936	-3.39722	-3.7584	-4.00279	-3.23211
	1.09613	0.334699	1.26111	High	Q16777	Histone H2A type 2-C OS=Homo sapiens OX=9606	H2AC20			0.911371	0.217866	19.113	27	3	626	1	129	14	10.9	15	15	19	17	17	21	19	19	14	20	18	20	1		-0.412265	-0.519622	-0.507642	-0.194118	-0.358521	0.117207	-0.51475	-0.314752	-0.22094
	0.809773	0.334357	1.26082	High	Q99567	Nuclear pore complex protein Nup88 OS=Homo sapiens OX=9606	NUP88			1.50007	0.120012	123.605	35	15	382	15	741	83.5	5.69	7	12	11	12	11	12	9	12	10	9	9	11	1	Met-loss+Acetyl [N-Term]	1.04746	0.6125	0.405313	0.997792	0.995342	1.07521	1.73253	1.13561	1.46372
	0.547839	0.333712	1.26025	High	P22087	rRNA 2'-O-methyltransferase fibrillarin OS=Homo sapiens OX=9606	FBL			0.400918	0.465109	51.945	27	6	220	6	321	33.8	10.18							3	2	6	2	3		1		-0.685025	-0.94073	-0.515832	-0.723849	0.0805759	-0.497179	-0.238346	0.00179577	-0.748354
	0.820763	0.332945	1.25958	High	O75431	Metaxin-2 OS=Homo sapiens OX=9606	MTX2			0.921891	0.214664	45.285	45	7	285	7	263	29.7	6.29	12	10	11	13	16	9	13	6	20	13	13	13	1		0.201867	0.491923	0.1391	0.415332	0.912884	0.50351	1.02184	0.677592	0.534737
	1.00102	0.332886	1.25953	High	P04216	Thy-1 membrane glycoprotein OS=Homo sapiens OX=9606	THY1			1.82838	0.0867143	36.497	24	3	784	3	161	17.9	8.73	9	9	9	5	11	7	15	17	16	13	13	16	1		1.14834	0.956887	0.854104	1.08368	1.53233	1.34198	1.66058	1.45579	1.59558
	0.365016	0.332765	1.25942	High	Q92581	Sodium/hydrogen exchanger 6 OS=Homo sapiens OX=9606	SLC9A6			0.941474	0.209741	4.431	2	1	6	1	669	74.1	6.48		2							2				1		-4.21429	-4.99832	-5.10024	-4.30508	-4.07265	-4.93683	-4.016	-4.00062	-3.94965
	1.37952	0.332129	1.25887	High	P10606	Cytochrome c oxidase subunit 5B, mitochondrial OS=Homo sapiens OX=9606	COX5B			2.12724	0.0673791	42.335	39	6	409	6	129	13.7	8.81	11	11	15	10	19	16	16	14	16	13	18	12	1		1.20484	1.14361	0.971772	1.32093	1.61119	1.38449	1.64796	1.53452	1.53794
	0.849745	0.330566	1.25751	High	Q9NR30	Nucleolar RNA helicase 2 OS=Homo sapiens OX=9606	DDX21			1.0018	0.19945	163.289	47	26	1389	24	783	87.3	9.28	11	14	15	12	14	14	24	23	25	32	24	15	1		2.10964	1.91534	2.17194	2.0703	2.57879	2.53953	2.8078	2.64575	2.27252
	1.66693	0.330044	1.25705	High	Q9P003	Protein cornichon homolog 4 OS=Homo sapiens OX=9606	CNIH4			2.00918	0.0732919	20.228	14	1	96	1	139	16.1	6.65	6	7	7	5	5	4	6	3	6	5	6	6	1		-0.89569	-1.14913	-1.02311	-0.630437	-0.797197	-0.650162	0.124296	-0.562858	0.0485783
	0.74485	0.329654	1.25671	High	Q5MNZ6	WD repeat domain phosphoinositide-interacting protein 3 OS=Homo sapiens OX=9606	WDR45B			1.16278	0.167477	3.645	3	1	6	1	344	38.1	7.59	1			1			1	2	1				1		-3.69023	-4.04743	-3.41264	-3.4673	-3.48007	-3.21396	-3.1838	-3.33828	-3.10988
	1.45295	0.328403	1.25562	High	Q9UJ14	Glutathione hydrolase 7 OS=Homo sapiens OX=9606	GGT7			1.23621	0.154787	26.844	9	3	44	3	662	70.4	5.1	1	4	2	3	1	4	2	2	4	3	2	4	1		-1.8135	-1.81473	-1.56246	-1.30918	-1.37391	-1.5224	-1.44114	-1.64118	-1.34112
	1.89152	0.327422	1.25477	High	O00217	NADH dehydrogenase [ubiquinone] iron-sulfur protein 8, mitochondrial OS=Homo sapiens OX=9606	NDUFS8			2.80926	0.0537447	24.141	29	4	286	4	210	23.7	6.34	7	8	8	8	9	8	9	13	15	10	9	11	1		0.00170231	-0.0152102	-0.151824	0.155126	0.343662	0.318146	0.609488	0.38255	0.503899
	0.163235	0.326647	1.2541	High	Q5JPH6	Probable glutamate--tRNA ligase, mitochondrial OS=Homo sapiens OX=9606	EARS2			0.146313	0.737267	9.782	7	2	17	2	523	58.7	8.76	3		2	2	3	1	2		3		1		1		-3.71306	-3.32955	-4.22294	-2.87006	-2.58309	-4.83246	-3.86083	-2.71625	-2.98119
	0.525353	0.326104	1.25362	High	Q15758	Neutral amino acid transporter B(0) OS=Homo sapiens OX=9606	SLC1A5			1.23297	0.155211	34.943	12	5	443	5	541	56.6	5.48	16	20	17	18	12	22	17	21	22	20	18	15	1		1.45338	1.46076	1.40164	1.53338	1.45321	2.3075	2.22609	1.96742	2.32648
	1.06322	0.325437	1.25304	High	P17568	NADH dehydrogenase [ubiquinone] 1 beta subcomplex subunit 7 OS=Homo sapiens OX=9606	NDUFB7			2.1685	0.0661846	14.635	26	2	66	2	137	16.4	8.92	1	1	2	1	2		2	2	1	2	4	3	1		-2.0205	-2.14929	-2.3588	-2.02821	-1.8585	-1.66557	-1.45746	-1.63494	-1.31539
	1.09242	0.324874	1.25255	High	Q96QV6	Histone H2A type 1-A OS=Homo sapiens OX=9606	H2AC1			0.880769	0.228645	23.668	30	3	545	1	131	14.2	10.86	13	15	18	17	17	18	18	16	13	18	18	18	1		-2.16822	-1.91809	-2.15493	-1.67821	-1.97958	-1.60884	-2.3801	-2.03491	-1.90545
	0.608209	0.324117	1.2519	High	P35240	Merlin OS=Homo sapiens OX=9606	NF2			0.484809	0.403688	6.184	3	2	6	2	595	69.6	6.47	1						1				1		1		-3.29981	-3.80146	-2.98687	-3.04109	-3.08676	-2.98794	-2.75928	-3.24829	-3.10279
	0.419171	0.323963	1.25176	High	Q6NTF9	Rhomboid domain-containing protein 2 OS=Homo sapiens OX=9606	RHBDD2			0.252888	0.605097	6.552	4	1	36	1	364	39.2	9.32	2	3	2	1	3	3	2	4	2	3	5	1	1		-3.507	-4.06378	-4.04223	-3.83189	-3.81079	-2.99845	-3.47279	-3.86675	-3.77171
	1.93937	0.32317	1.25108	High	Q9Y4P3	Transducin beta-like protein 2 OS=Homo sapiens OX=9606	TBL2			2.68064	0.0547257	118.336	39	14	750	14	447	49.8	9.44	10	12	9	13	12	15	15	16	21	22	14	16	1		1.20799	1.07162	1.2503	1.40189	1.55958	1.53795	1.70493	1.53433	1.69708
	1.32615	0.322722	1.25069	High	Q53GS9	U4/U6.U5 tri-snRNP-associated protein 2 OS=Homo sapiens OX=9606	USP39			1.08968	0.182497	77.818	27	11	364	11	565	65.3	8.91	5	7	1	7	5	7	7	4	7	15	6	10	1		0.81747	0.930669	0.738826	0.955537	1.22222	1.27737	1.07576	1.03614	1.43938
	1.9785	0.32269	1.25066	High	Q9NVI7	ATPase family AAA domain-containing protein 3A OS=Homo sapiens OX=9606	ATAD3A			2.3303	0.0587053	91.586	26	14	1328	7	634	71.3	8.98	43	50	49	54	59	60	60	53	55	50	57	55	1	Met-loss+Acetyl [N-Term]	1.08844	1.05326	1.14299	1.41273	1.30554	1.53448	1.55751	1.44693	1.73867
	0.63902	0.321381	1.24953	High	Q13190	Syntaxin-5 OS=Homo sapiens OX=9606	STX5			0.717141	0.287853	16.383	14	3	48	3	355	39.6	9.16	2	3	2	2		5	1	3	3	5	3	4	1		-0.607949	-0.24109	-0.158496	0.261027	-0.35294	0.048521	-0.0217342	0.125262	-0.0204811
	0.278202	0.321333	1.24948	High	Q9Y6M7	Sodium bicarbonate cotransporter 3 OS=Homo sapiens OX=9606	SLC4A7			0.650641	0.312891	8.111	1	1	18	1	1214	136	6.71	2	1	2	1	3		2		1	1	3	1	1		-3.02719	-3.12306	-3.45098	-3.33626	-3.31429	-1.98667	-3.77341	-3.6028	-3.52311
	0.779943	0.320233	1.24853	High	O75787	Renin receptor OS=Homo sapiens OX=9606	ATP6AP2			0.706624	0.290942	13.354	15	4	29	4	350	39	6.1	1	2	1	2	2	2	3	2		2		3	1		-1.77552	-2.10863	-1.50729	-1.58666	-1.50994	-1.33415	-1.48415	-1.65827	-1.52887
	0.71655	0.319749	1.24811	High	O15484	Calpain-5 OS=Homo sapiens OX=9606	CAPN5			1.13155	0.175294	7.656	3	1	63	1	640	73.1	7.64	2	2	3	2	3	3	3	2	3	2	2	1	1		-2.40064	-2.77953	-3.07718	-2.49449	-2.48543	-2.31819	-2.14652	-2.39485	-2.19821
	1.78009	0.319597	1.24798	High	O94905	Erlin-2 OS=Homo sapiens OX=9606	ERLIN2	+	Cluster -67	3.13076	0.0392667	55.43	45	10	694	9	339	37.8	5.62	29	21	27	24	30	27	24	27	32	29	28	31	1		0.603166	0.527322	0.61287	0.751517	0.999624	0.951008	1.06308	1.14561	1.13387
	0.121819	0.319223	1.24766	High	P12035	Keratin, type II cytoskeletal 3 OS=Homo sapiens OX=9606	KRT3			0.0369951	0.918044	24.815	7	5	583	1	628	64.4	6.48				1	1			6	1			1	1		-4.1028	-4.98518	-3.6124	-4.80243	-4.76269	-2.17759	-5.10174	-2.52885	-3.91721
	1.99286	0.319	1.24747	High	Q9NUQ2	1-acyl-sn-glycerol-3-phosphate acyltransferase epsilon OS=Homo sapiens OX=9606	AGPAT5			2.49939	0.0611389	31.63	16	4	127	4	364	42	9.1	2	3	4	2	4	4	3	4	5	4	4	4	1		-0.539367	-0.349065	-0.519301	-0.18991	-0.0811577	-0.179667	0.136459	-0.103339	0.184137
	0.305896	0.316989	1.24573	High	Q8IX01	SURP and G-patch domain-containing protein 2 OS=Homo sapiens OX=9606	SUGP2			0.124865	0.768306	61.828	16	9	60	9	1082	120.1	7.28								1					1		-2.62854	-3.75978	-2.478	-2.87942	-2.52587	-2.51006	-2.20255	-3.15815	-2.87591
	0.232007	0.31397	1.24312	High	P11182	Lipoamide acyltransferase component of branched-chain alpha-keto acid dehydrogenase complex, mitochondrial OS=Homo sapiens OX=9606	DBT			0.277691	0.580388	28.097	25	6	116	6	482	53.5	8.51	8	7	10	9	9	7	11	7	10	6	7	13	1		0.930272	0.116538	0.184569	0.306191	0.21879	1.64831	0.144527	0.11761	0.354376
	0.295672	0.313596	1.2428	High	Q86T03	Type 1 phosphatidylinositol 4,5-bisphosphate 4-phosphatase OS=Homo sapiens OX=9606	PIP4P1			0.0770137	0.84198	17.76	19	4	22	3	277	29.5	8.91				1			1	2	2	1		1	1		-3.65832	-3.60047	-3.70381	-3.15725	-2.70652	-4.15805	-3.31269	-2.85961	-4.4938
	0.898713	0.313574	1.24278	High	Q9UHA4	Ragulator complex protein LAMTOR3 OS=Homo sapiens OX=9606	LAMTOR3			1.05925	0.187834	29.846	56	4	222	4	124	13.6	7.34	7	6	5	6	12	6	9	9	10	9	11	7	1		-0.57392	-0.610562	-0.910495	-0.512263	-0.138905	-0.503086	-0.115227	-0.295745	-0.459631
	1.17023	0.313428	1.24266	High	Q15717	ELAV-like protein 1 OS=Homo sapiens OX=9606	ELAVL1			0.879819	0.228845	83.055	44	10	535	9	326	36.1	9.17	4	6	4	5	4	5	8	9	8	8	6	6	1	Met-loss+Acetyl [N-Term]	1.38518	1.40142	1.45029	1.47966	1.8807	1.81681	1.64197	1.85179	1.47068
	2.69715	0.312169	1.24157	High	P27824	Calnexin OS=Homo sapiens OX=9606	CANX	+	Cluster -67	3.9721	0.0334545	230.564	41	16	2502	16	592	67.5	4.6	104	123	121	126	124	131	138	150	152	155	151	152	1		5.7605	5.79687	5.66618	6.03991	6.02831	6.09184	6.17486	6.22328	6.13685
	1.69202	0.311463	1.24097	High	Q9Y5L4	Mitochondrial import inner membrane translocase subunit Tim13 OS=Homo sapiens OX=9606	TIMM13			2.65799	0.0547586	10.885	11	1	102	1	95	10.5	8.18	3	3	8	4	5	6	3	5	8	8	4	8	1		-0.556726	-0.62296	-0.372649	-0.225467	-0.134365	-0.258114	-0.0462093	-0.116687	0.0202637
	1.03144	0.309409	1.2392	High	P09669	Cytochrome c oxidase subunit 6C OS=Homo sapiens OX=9606	COX6C			1.09457	0.181847	9.429	37	3	313	3	75	8.8	10.39	12	9	11	9	7	10	11	12	12	12	16	12	1		1.71981	1.71109	1.5328	1.76037	2.1973	1.93425	2.25241	1.83496	2.11061
	2.5357	0.308373	1.23831	High	P31930	Cytochrome b-c1 complex subunit 1, mitochondrial OS=Homo sapiens OX=9606	UQCRC1	+	Cluster -67	3.85115	0.0431429	173.981	50	16	1406	16	480	52.6	6.37	48	51	60	56	54	57	55	59	68	65	70	61	1		3.3125	3.33779	3.26551	3.53071	3.63846	3.67176	3.79827	3.71029	3.75733
	0.342617	0.308029	1.23801	High	Q14657	EKC/KEOPS complex subunit LAGE3 OS=Homo sapiens OX=9606	LAGE3			0.384944	0.479395	7.769	10	1	26	1	143	14.8	8.63	1	2	2	1	2	2	3	1	1	3	1	2	1		-3.20155	-3.64824	-4.33077	-3.2501	-3.76903	-3.23734	-3.33311	-3.4805	-2.98622
	1.03095	0.305578	1.23591	High	Q6IAA8	Ragulator complex protein LAMTOR1 OS=Homo sapiens OX=9606	LAMTOR1			1.65814	0.102541	67.348	57	7	386	7	161	17.7	5.15	17	11	11	13	12	13	12	16	12	13	11	14	1		0.519444	0.440143	0.543633	0.535573	0.950832	0.933548	1.01148	0.985089	0.876976
	2.51627	0.304436	1.23494	High	Q9BT40	Inositol polyphosphate 5-phosphatase K OS=Homo sapiens OX=9606	INPP5K	+	Cluster -67	3.81513	0.04075	6.37	2	1	9	1	448	51.1	6.54		1			1	1	1	1	1	1	1	1	1		-3.24218	-3.38014	-3.26493	-3.02767	-2.9907	-2.95558	-2.91003	-2.86646	-2.83697
	1.33631	0.304195	1.23473	High	P18077	60S ribosomal protein L35a OS=Homo sapiens OX=9606	RPL35A			2.89582	0.0522532	12.803	25	3	446	3	110	12.5	11.06	9	10	12	14	10	14	11	17	10	21	18	16	1		1.15744	0.944318	1.28557	1.38276	1.50751	1.40964	1.9175	1.77528	1.74297
	0.149115	0.303219	1.23389	High	Q5VST6	Alpha/beta hydrolase domain-containing protein 17B OS=Homo sapiens OX=9606	ABHD17B			0.142729	0.743204	17.542	18	2	23	2	288	32.2	6.29	2	1	3	1	2	2		1	2	1	1	3	1		-3.04061	-2.47679	-4.91338	-3.12067	-2.89667	-3.50378	-2.8066	-3.1015	-2.97436
	0.642527	0.300319	1.23142	High	Q9NY61	Protein AATF OS=Homo sapiens OX=9606	AATF			0.538433	0.370243	23.622	11	4	21	4	560	63.1	4.94													1		-2.7827	-3.13288	-2.46726	-2.63928	-2.50424	-2.33838	-2.45128	-2.69316	-2.5031
	1.1156	0.298684	1.23002	High	Q13459	Unconventional myosin-IXb OS=Homo sapiens OX=9606	MYO9B			1.47347	0.12327	38.461	6	7	82	7	2157	243.2	8.75	5	6	5	8	6	7	2	6	2	3	4	2	1		1.56621	1.28525	1.44355	1.56251	1.7331	1.89545	2.12029	1.84056	1.76324
	1.10974	0.297309	1.22885	High	Q9NU22	Midasin OS=Homo sapiens OX=9606	MDN1			1.53989	0.115929	101.43	7	25	116	25	5596	632.4	5.68													1	Acetyl [N-Term]	-0.115443	0.011548	0.261661	0.232308	0.387947	0.429436	0.610229	0.331473	0.609608
	0.195168	0.29729	1.22883	High	Q5VIR6	Vacuolar protein sorting-associated protein 53 homolog OS=Homo sapiens OX=9606	VPS53			0.42394	0.44772	19.745	7	3	17	3	832	94.3	6.7	1	1	2	2		1	3	1	1	2	1	1	1		-3.02959	-1.793	-2.62822	-1.96917	-1.5248	-3.06497	-1.6257	-1.70365	-1.93112
	0.164833	0.297267	1.22881	High	Q15059	Bromodomain-containing protein 3 OS=Homo sapiens OX=9606	BRD3			0.0697232	0.856235	30.996	11	6	58	3	726	79.5	9.36	2	1	1	2	1		1	2	2	2	2	1	1		-4.6749	-4.7324	-5.05791	-3.18751	-5.17734	-5.20857	-5.09309	-4.70963	-3.59345
	0.473927	0.296923	1.22852	High	A3KN83	Protein strawberry notch homolog 1 OS=Homo sapiens OX=9606	SBNO1			0.516255	0.383398	9.251	4	3	7	3	1393	154.2	7.88			1	1	1	2							1		-3.87824	-3.774	-3.72959	-2.97845	-3.63852	-3.87409	-4.17895	-3.71815	-3.8307
	0.522421	0.296485	1.22815	High	Q8N7H5	RNA polymerase II-associated factor 1 homolog OS=Homo sapiens OX=9606	PAF1			0.528114	0.37727	11.09	7	2	21	2	531	59.9	4.63	1	1		1	2	1		1		1			1		-1.86611	-2.05421	-2.66054	-1.85055	-2.03293	-1.80791	-1.96485	-2.45997	-2.53426
	0.323837	0.296111	1.22783	High	P07947	Tyrosine-protein kinase Yes OS=Homo sapiens OX=9606	YES1			0.2471	0.612756	58.469	26	8	352	5	543	60.8	6.74	13	12	16	16	13	18	14	15	13	14	19	13	1		-4.09303	-4.3613	-4.68963	-4.36159	-3.42134	-4.47269	-4.03557	-4.45411	-3.27475
	0.45175	0.29586	1.22762	High	P07355	Annexin A2 OS=Homo sapiens OX=9606	ANXA2			0.723527	0.284735	663.344	85	51	16811	51	339	38.6	7.75	311	345	313	298	283	307	407	395	495	439	449	382	1	Met-loss+Acetyl [N-Term]	8.28941	7.7194	7.73888	7.81426	8.53469	8.28632	8.84578	8.4507	8.20201
	0.0811055	0.295354	1.22719	High	Q96CV9	Optineurin OS=Homo sapiens OX=9606	OPTN			0.0999447	0.803257	5.292	10	2	5	2	577	65.9	5.17	2				1				1		1		1		-3.07685	-5.47354	-1.68043	-2.36991	-4.41845	-2.5564	-2.69778	-2.14649	-3.16599
	1.96604	0.294968	1.22686	High	O75489	NADH dehydrogenase [ubiquinone] iron-sulfur protein 3, mitochondrial OS=Homo sapiens OX=9606	NDUFS3	+	Cluster -67	3.15368	0.041	84.52	42	9	681	9	264	30.2	7.5	28	34	30	36	33	29	35	28	40	30	34	34	1		1.82276	1.73423	1.70088	2.01246	1.97578	2.15455	2.39423	2.20124	2.31931
	1.76692	0.294547	1.2265	High	Q02127	Dihydroorotate dehydrogenase (quinone), mitochondrial OS=Homo sapiens OX=9606	DHODH			0.521253	0.380983	6.438	8	2	12	2	395	42.8	9.67		1	1		2	1			2	2	2	1	1		-3.10772	-2.93315	-2.96381	-2.7155	-2.79283	-2.61272	-2.41916	-3.15536	-2.64163
	1.01412	0.29437	1.22635	High	P36955	Pigment epithelium-derived factor OS=Homo sapiens OX=9606	SERPINF1			1.03222	0.19275	50.448	36	9	234	9	418	46.3	6.38	9	5	7	9	14	9	13	14	12	10	13	13	1		1.2972	1.06296	1.34505	1.32572	1.58934	1.67326	1.44143	1.60959	1.44422
	1.20104	0.294106	1.22613	High	O95070	Protein YIF1A OS=Homo sapiens OX=9606	YIF1A			1.42101	0.127252	27.214	12	2	123	2	293	32	8.95	7	7	8	3	8	9	9	8	9	10	8	9	1		-0.496673	-0.615111	-0.748116	-0.226474	-0.504034	-0.247074	-0.226606	-0.357768	-0.00533104
	0.590142	0.293678	1.22576	High	Q6P161	39S ribosomal protein L54, mitochondrial OS=Homo sapiens OX=9606	MRPL54			0.489004	0.400639	4.254	7	1	61	1	138	15.8	9.6	4	4	3	4	5	6	2	3	4	3	3	6	1		-2.00361	-1.71163	-1.76098	-1.15814	-1.58022	-1.85684	-1.66087	-1.54023	-1.63058
	1.54793	0.293148	1.22531	High	P43307	Translocon-associated protein subunit alpha OS=Homo sapiens OX=9606	SSR1			1.69131	0.100055	46.114	31	5	519	5	286	32.2	4.49	21	19	20	17	20	19	23	17	18	27	19	23	1		2.70838	2.45147	2.70479	2.92618	2.87662	2.94129	3.05647	2.84588	3.15626
	0.919119	0.292455	1.22472	High	O43920	NADH dehydrogenase [ubiquinone] iron-sulfur protein 5 OS=Homo sapiens OX=9606	NDUFS5			1.74683	0.0946667	17.702	35	3	116	3	106	12.5	9.14	4	3	5	2	5	3	4	3	3	3	2	5	1		-2.11033	-1.90745	-2.33145	-1.91092	-1.6555	-1.90545	-1.5962	-1.52573	-1.67331
	0.222066	0.291611	1.22401	High	Q9BSC4	Nucleolar protein 10 OS=Homo sapiens OX=9606	NOL10			0.983541	0.203376	17.18	7	3	25	3	688	80.3	8.46													1		-5.33521	-5.72205	-4.66313	-4.28612	-5.69371	-4.86573	-4.79433	-3.06335	-3.45208
	1.15811	0.291079	1.22356	High	P82675	28S ribosomal protein S5, mitochondrial OS=Homo sapiens OX=9606	MRPS5			1.00079	0.199023	33.113	21	7	79	7	430	48	9.92	7	5	9	7	5	5	4	5	4	7	5	9	1		0.6885	0.512465	0.685449	0.749551	0.905077	1.10502	0.798199	0.679338	0.911652
	0.946442	0.289829	1.2225	High	O75955	Flotillin-1 OS=Homo sapiens OX=9606	FLOT1			1.45301	0.125249	117.476	55	17	482	17	427	47.3	7.49	3	4	3	4	3	4	4	6	11	10	5	10	1		1.03144	0.683623	1.01818	1.06267	1.3617	1.17835	1.49322	1.26232	1.32486
	2.30083	0.28956	1.22227	High	O75718	Cartilage-associated protein OS=Homo sapiens OX=9606	CRTAP			2.83813	0.0553953	40.048	25	9	497	8	401	46.5	5.73	15	19	18	12	17	19	19	17	21	27	20	26	1		1.77707	1.81184	1.92582	2.11714	2.08965	2.17661	2.08977	2.18129	2.21204
	1.74822	0.288627	1.22148	High	P27105	Stomatin OS=Homo sapiens OX=9606	STOM			1.63921	0.10555	62.99	35	6	219	6	288	31.7	7.88	2	3	2	1	2	1	3	3	2	3	2	2	1		-1.88055	-1.66671	-1.7819	-1.44367	-1.57061	-1.44899	-1.27989	-1.59629	-1.31277
	0.402723	0.288178	1.2211	High	Q8TCG1	Protein CIP2A OS=Homo sapiens OX=9606	CIP2A			1.28901	0.144555	10.57	5	3	25	3	905	102.1	6.23	3		4	1	3	2	1	3	3	1	1	3	1		-2.84872	-2.32951	-2.31559	-2.47724	-1.71589	-2.43615	-2.98344	-2.88681	-3.53655
	0.506157	0.28748	1.22051	High	Q96SZ6	Mitochondrial tRNA methylthiotransferase CDK5RAP1 OS=Homo sapiens OX=9606	CDK5RAP1			0.407945	0.459358	5.396	2	1	7	1	601	67.6	8.21			1		1	1	1	1	1		1		1		-4.59291	-4.08422	-4.6819	-4.21386	-4.42346	-3.85928	-4.37536	-4.32286	-4.54742
	1.60198	0.2873	1.22035	High	Q15582	Transforming growth factor-beta-induced protein ig-h3 OS=Homo sapiens OX=9606	TGFBI			1.61835	0.107731	325.276	54	26	3115	26	683	74.6	7.71	80	129	113	130	128	152	154	180	142	163	144	164	1		4.54757	4.62377	4.69223	4.7671	4.97287	4.98551	4.89761	4.85919	4.74039
	1.82319	0.287001	1.2201	High	Q9H061	Transmembrane protein 126A OS=Homo sapiens OX=9606	TMEM126A			2.4089	0.0601156	24.104	37	6	175	6	195	21.5	9.26	7	10	7	8	13	10	7	11	9	10	7	12	1		-0.338483	-0.509658	-0.509002	-0.216359	-0.19577	-0.0840111	0.070549	-0.140992	0.0581512
	1.27965	0.285566	1.21889	High	P33897	ATP-binding cassette sub-family D member 1 OS=Homo sapiens OX=9606	ABCD1			0.653997	0.311293	10.655	4	2	24	2	745	82.9	8.95		1	4	3	3	2	3	1	2	1	1	3	1		-2.71207	-2.52934	-2.55382	-2.13831	-2.38682	-2.41339	-2.35606	-2.68899	-2.19373
	1.21195	0.284152	1.21769	High	P61225	Ras-related protein Rap-2b OS=Homo sapiens OX=9606	RAP2B			1.34522	0.137235	54.876	38	6	305	6	183	20.5	4.81	14	11	13	7	14	13	13	15	14	13	13	10	1		0.529031	0.478665	0.201592	0.614121	0.687521	0.760101	0.607243	0.621448	0.6929
	1.32612	0.283927	1.2175	High	P51991	Heterogeneous nuclear ribonucleoprotein A3 OS=Homo sapiens OX=9606	HNRNPA3			1.95344	0.0772881	114.26	29	11	1276	10	378	39.6	9.01	23	22	18	18	22	15	26	24	27	28	29	25	1		1.06081	0.935512	1.02767	1.11258	1.42392	1.33927	1.33348	1.55535	1.44676
	0.612363	0.283912	1.21749	High	Q96RT1	Erbin OS=Homo sapiens OX=9606	ERBIN			0.647606	0.313684	13.218	4	3	44	3	1412	158.2	5.5	4	3	1	2	2	3	4	2	4		3	4	1		-2.50499	-2.56677	-3.15229	-2.43532	-2.51219	-2.4248	-2.47191	-2.30104	-2.50006
	0.622444	0.283429	1.21708	High	O43731	ER lumen protein-retaining receptor 3 OS=Homo sapiens OX=9606	KDELR3			1.46154	0.124822	6.336	12	2	23	2	214	25	8.94	1	1	2	2	3		1	2	2	2	1	5	1		-3.59553	-3.63742	-3.11069	-3.0863	-3.01511	-3.39195	-2.68694	-3.00463	-2.59932
	1.16936	0.282928	1.21666	High	P15144	Aminopeptidase N OS=Homo sapiens OX=9606	ANPEP			1.49566	0.120748	202.836	35	26	856	26	967	109.5	5.48	1		1	1	2	1	2	2	4	4	5	7	1		-0.0914526	0.0729589	0.177783	0.36221	0.181877	0.463987	0.46159	0.326495	0.353098
	2.13779	0.28267	1.21644	High	P46977	Dolichyl-diphosphooligosaccharide--protein glycosyltransferase subunit STT3A OS=Homo sapiens OX=9606	STT3A	+	Cluster -67	3.22757	0.0377021	106.15	25	16	1638	16	705	80.5	8.07	36	45	46	45	48	48	47	53	47	43	50	51	1		3.00704	2.88744	3.02787	3.1875	3.30107	3.28178	3.325	3.37311	3.41562
	0.960193	0.282531	1.21633	High	Q9NWU5	39S ribosomal protein L22, mitochondrial OS=Homo sapiens OX=9606	MRPL22			2.12444	0.0674552	10.147	12	2	51	2	206	23.6	9.94		6	7	6	7	1	7	5	2	1	4	4	1		-1.66379	-1.51342	-1.573	-1.55642	-1.22034	-1.12586	-1.092	-0.885974	-0.937515
	2.105	0.282021	1.2159	High	Q99808	Equilibrative nucleoside transporter 1 OS=Homo sapiens OX=9606	SLC29A1	+	Cluster -67	3.33222	0.0381622	17.188	7	3	259	3	456	50.2	8.29	12	7	9	9	6	9	12	9	11	14	13	12	1		0.250985	0.119393	0.144824	0.39211	0.53019	0.438965	0.543167	0.567	0.596928
	0.491436	0.281921	1.21581	High	Q12789	General transcription factor 3C polypeptide 1 OS=Homo sapiens OX=9606	GTF3C1			0.346545	0.512378	79.794	9	12	130	12	2109	238.7	7.3	1								1				1		-1.06678	-1.37562	-1.30309	-1.42272	-0.665159	-0.811853	-1.08543	-1.18558	-0.991247
	0.800226	0.28182	1.21573	High	Q8TEA8	D-aminoacyl-tRNA deacylase 1 OS=Homo sapiens OX=9606	DTD1			1.05254	0.189053	11.988	15	2	59	2	209	23.4	8.24	3	4	3	5	1	3	2	3	1	2	2	2	1		-0.0668325	-0.257867	0.0452204	-0.079669	0.367416	0.278233	0.302383	0.182736	0.292446
	0.277344	0.280955	1.215	High	Q969R8	KICSTOR complex protein ITFG2 OS=Homo sapiens OX=9606	ITFG2			0.115968	0.780041	5.532	6	1	3	1	447	49.3	5.22	1				1				1				1		-4.8673	-5.16959	-5.56044	-4.21027	-5.29481	-5.24938	-4.64613	-5.16872	-5.36776
	1.39196	0.280568	1.21467	High	P19404	NADH dehydrogenase [ubiquinone] flavoprotein 2, mitochondrial OS=Homo sapiens OX=9606	NDUFV2			2.34239	0.0590448	61.625	37	8	414	8	249	27.4	8.06	20	17	13	19	17	14	18	22	17	18	17	22	1		1.06071	1.06261	0.917573	1.14585	1.42391	1.31283	1.48977	1.51288	1.38945
	1.60385	0.280123	1.2143	High	P51970	NADH dehydrogenase [ubiquinone] 1 alpha subcomplex subunit 8 OS=Homo sapiens OX=9606	NDUFA8			2.36381	0.059288	31.585	34	4	281	4	172	20.1	7.65	5	11	8	5	8	9	11	13	11	11	11	13	1		1.08167	1.11501	0.940036	1.22331	1.32468	1.42908	1.5451	1.37624	1.46543
	0.269906	0.279628	1.21388	High	Q9Y5P4	Ceramide transfer protein OS=Homo sapiens OX=9606	CERT1			0.225723	0.635904	12.229	11	3	16	3	624	70.8	5.48	2	1	2	2	1		2	1	1		3		1		-2.88811	-3.81332	-2.85397	-3.1466	-3.20476	-2.36515	-2.85464	-3.01563	-2.6186
	1.06341	0.279334	1.21363	High	Q09666	Neuroblast differentiation-associated protein AHNAK OS=Homo sapiens OX=9606	AHNAK			1.83277	0.0867434	3431.34	73	280	52090	279	5890	628.7	6.15	710	797	661	676	704	780	908	929	1065	1124	904	886	1		8.34358	8.057	8.14371	8.28282	8.53046	8.56901	8.92382	8.72313	8.57608
	0.246459	0.278299	1.21276	High	Q5VW36	Focadhesin OS=Homo sapiens OX=9606	FOCAD			0.150547	0.732469	9.229	2	3	20	3	1801	199.9	6.62	2	1	2	2	1	3	2	1	3	1	1	1	1		-2.26798	-1.55843	-0.982982	-1.74357	-1.34461	-0.886309	-1.63076	-1.29087	-0.959408
	0.707472	0.278273	1.21274	High	P18440	Arylamine N-acetyltransferase 1 OS=Homo sapiens OX=9606	NAT1			0.501523	0.392044	6.412	9	2	8	2	290	33.9	6.54	1				2	1		2	1		1		1		-3.45722	-3.07689	-2.91719	-3.02468	-2.84396	-2.74784	-2.85626	-3.19082	-3.14456
	0.979931	0.278258	1.21273	High	Q4G176	Malonate--CoA ligase ACSF3, mitochondrial OS=Homo sapiens OX=9606	ACSF3			0.850382	0.238593	4.684	3	1	5	1	576	64.1	8.37		1					2	1		1			1		-3.38526	-3.1097	-2.99033	-2.92021	-2.9705	-2.75981	-2.76536	-3.08405	-2.8221
	3.22554	0.277646	1.21222	High	Q86TX2	Acyl-coenzyme A thioesterase 1 OS=Homo sapiens OX=9606	ACOT1	+	Cluster -67	3.61844	0.03712	52.337	33	8	203	8	421	46.2	7.34	14	14	11	20	20	15	20	21	15	18	15	18	1		0.949544	0.9803	0.925961	1.19285	1.2229	1.27299	1.23157	1.27444	1.35636
	0.953264	0.276924	1.21161	High	P67812	Signal peptidase complex catalytic subunit SEC11A OS=Homo sapiens OX=9606	SEC11A			0.778234	0.267132	4.193	4	1	205	1	179	20.6	9.48	13	13	9	14	6	12	12	15	11	11	10	16	1		0.659055	0.399711	0.682967	0.896852	0.665714	1.00994	1.01595	0.641511	1.21022
	0.307111	0.27644	1.2112	High	P19021	Peptidyl-glycine alpha-amidating monooxygenase OS=Homo sapiens OX=9606	PAM			0.191626	0.67857	24.723	7	4	59	4	973	108.3	6.42	4	6	1	3	6	5	3	8	4	4	5	6	1		-0.74356	0.0354681	-0.542563	0.168351	0.115837	-0.705523	-0.544449	-0.00179577	0.256207
	0.531766	0.27614	1.21095	High	P62841	40S ribosomal protein S15 OS=Homo sapiens OX=9606	RPS15			0.984395	0.203144	149.745	73	8	945	8	145	17	10.39	19	20	20	18	20	24	22	27	30	29	23	26	1		2.50841	2.17747	2.00646	2.40589	2.26718	2.84768	2.80512	2.55633	3.02902
	0.852674	0.275719	1.2106	High	Q9NTN3	UDP-glucuronic acid/UDP-N-acetylgalactosamine transporter OS=Homo sapiens OX=9606	SLC35D1			0.579527	0.349551	17.109	6	2	70	2	355	39.2	8.97	5	5	3	4	4	5	8	5	7	7	4	5	1		-1.39517	-1.2486	-1.52168	-1.02877	-0.945595	-1.36393	-0.906387	-0.994374	-1.41063
	0.695827	0.275265	1.21022	High	Q2PZI1	Probable C-mannosyltransferase DPY19L1 OS=Homo sapiens OX=9606	DPY19L1			0.748503	0.274424	26.763	6	2	58	2	675	77.3	8.95	3	3	4	3	4	5	4	4	5	3	4	5	1		-1.04241	-0.850562	-0.735147	-0.790484	-0.290527	-0.721315	-0.6329	-0.583756	-0.579403
	0.972926	0.274861	1.20988	High	P55290	Cadherin-13 OS=Homo sapiens OX=9606	CDH13			1.52172	0.118006	108.901	26	13	695	13	713	78.2	4.98	3	1	1	3	2	1	1	2	3	3	2	1	1		-0.0156279	-0.192985	-0.161189	-0.0363798	0.376408	0.114754	0.349094	0.236413	0.242968
	1.21682	0.274383	1.20948	High	P18887	DNA repair protein XRCC1 OS=Homo sapiens OX=9606	XRCC1			1.32712	0.139769	30.409	9	4	57	4	633	69.5	6.28	3	1	2		3	4	3	3		2	1	2	1		1.18437	0.988414	1.24149	1.32707	1.35228	1.55807	1.54367	1.31502	1.61583
	0.745681	0.274034	1.20918	High	Q8IXM3	39S ribosomal protein L41, mitochondrial OS=Homo sapiens OX=9606	MRPL41			1.20375	0.160953	9.759	36	3	90	3	137	15.4	9.57	7	7	4	5	4	5	3	9	4	7	6	6	1		-0.740794	-0.771184	-0.568175	-0.429749	-0.684896	-0.143406	-0.30452	-0.309897	0.027647
	0.878976	0.273898	1.20907	High	Q9BVL4	Protein adenylyltransferase SelO, mitochondrial OS=Homo sapiens OX=9606	SELENOO			0.400978	0.465232	3.694	2	1	5	1	669	73.4	5.97			1	1			1	1	1				1		-3.96984	-3.76065	-3.8315	-3.43881	-3.4587	-3.84279	-3.36596	-3.96152	-3.78346
	0.63569	0.271786	1.2073	High	Q68CQ7	Glycosyltransferase 8 domain-containing protein 1 OS=Homo sapiens OX=9606	GLT8D1			0.608355	0.331661	3.776	4	1	6	1	371	41.9	9.35						1	2	2			1		1		-3.86741	-3.96501	-3.41875	-3.66514	-3.36279	-3.40788	-3.56793	-3.50539	-3.07854
	0.207568	0.271606	1.20715	High	P63261	Actin, cytoplasmic 2 OS=Homo sapiens OX=9606	ACTG1			0.108806	0.790855	983.592	98	43	38164	1	375	41.8	5.48	1561	1723	1577	1761	1575	1658	1852	1663	1546	1570	1814	1611	1	Met-loss+Acetyl [N-Term]	-0.190425	-0.892287	-0.517661	-0.410354	-0.980688	0.605488	-0.5322	-0.562255	0.548538
	0.418692	0.271325	1.20692	High	Q9BZX2	Uridine-cytidine kinase 2 OS=Homo sapiens OX=9606	UCK2			0.164822	0.712872	38.867	28	6	167	6	261	29.3	6.7	13	12	11	14	14	14	12	15	13	12	13	14	1		-0.277965	-0.395465	-0.559047	0.19391	0.047821	-0.660233	0.0242233	-0.184768	-0.852846
	3.0125	0.26977	1.20562	High	Q12846	Syntaxin-4 OS=Homo sapiens OX=9606	STX4			1.4269	0.126097	29.279	25	5	72	5	297	34.2	6.28	4	7	6	3	6	6	7	6	8	4	3	4	1		-0.478686	-0.512805	-0.463004	-0.268046	-0.200699	-0.176441	-0.169529	-0.137803	-0.449068
	1.05142	0.269601	1.20547	High	Q9C0B5	Palmitoyltransferase ZDHHC5 OS=Homo sapiens OX=9606	ZDHHC5			1.13661	0.173842	14.935	6	2	25	2	715	77.5	9.01									2				1		-4.30081	-3.93272	-4.25036	-3.91568	-3.82238	-3.93703	-3.94548	-3.96764	-3.91027
	1.19135	0.269417	1.20532	High	Q9NVH1	DnaJ homolog subfamily C member 11 OS=Homo sapiens OX=9606	DNAJC11			1.62918	0.106453	64.915	31	13	294	13	559	63.2	8.4	3	3	7	8	7	5	6	8	8	6	9	10	1		0.504256	0.404935	0.660157	0.689	0.940796	0.747803	0.889427	0.800509	0.844524
	1.0327	0.269079	1.20504	High	P21281	V-type proton ATPase subunit B, brain isoform OS=Homo sapiens OX=9606	ATP6V1B2			1.5103	0.118776	105.638	51	17	632	12	511	56.5	5.81	19	14	15	13	17	15	11	17	19	17	16	16	1		1.04501	0.975799	0.784181	1.0165	1.31428	1.28145	1.48713	1.23012	1.34139
	0.381062	0.268644	1.20467	High	Q8N183	NADH dehydrogenase [ubiquinone] 1 alpha subcomplex assembly factor 2 OS=Homo sapiens OX=9606	NDUFAF2			0.189532	0.680831	6.911	11	1	19	1	169	19.8	8.97	1	1	1	1	1	1	1	1	2	2	2	2	1		-3.55908	-3.48278	-3.87211	-3.27048	-3.88081	-2.95675	-3.38274	-3.86239	-2.56692
	0.886021	0.267821	1.20399	High	Q9BV81	ER membrane protein complex subunit 6 OS=Homo sapiens OX=9606	EMC6			1.13198	0.175181	7.033	20	2	62	2	110	12	10.07	6	6	1	4	6	4	6	6	4	6	4	7	1		-1.60095	-1.92112	-1.71464	-1.68567	-1.40108	-1.34649	-1.36378	-1.51918	-1.22055
	3.03578	0.266998	1.2033	High	Q9BW60	Elongation of very long chain fatty acids protein 1 OS=Homo sapiens OX=9606	ELOVL1			2.2895	0.0603439	4.602	4	1	40	1	279	32.6	9.6	1	2	3	4	5	5	3	4	4	2	2	3	1		0.000819206	0.0132437	0.0602903	0.248212	0.33242	0.294716	0.481533	0.226878	0.348219
	1.24023	0.266276	1.2027	High	P28331	NADH-ubiquinone oxidoreductase 75 kDa subunit, mitochondrial OS=Homo sapiens OX=9606	NDUFS1			1.90438	0.0824706	157.815	44	21	1218	21	727	79.4	6.23	42	33	29	34	34	33	42	42	50	42	48	39	1		2.5581	2.41334	2.47392	2.56644	2.81723	2.86052	3.00962	2.85575	2.82694
	1.50995	0.264408	1.20114	High	Q86UY8	5'-nucleotidase domain-containing protein 3 OS=Homo sapiens OX=9606	NT5DC3			0.960598	0.207268	27.543	10	5	97	5	548	63.4	8.31	5	5	9	8	7	8	8	7	7	9	8	8	1		0.0953226	0.176852	-0.0669279	0.285117	0.306122	0.407232	0.222338	0.182	0.552219
	0.59594	0.263924	1.20074	High	P55265	Double-stranded RNA-specific adenosine deaminase OS=Homo sapiens OX=9606	ADAR			0.608525	0.331783	135.488	25	20	279	20	1226	136	8.65	2			2	2	1	5		3	4	1	3	1		0.401742	0.388925	0.487607	0.468717	1.08011	0.521221	0.959267	0.765071	0.560724
	1.36922	0.26334	1.20025	High	P22626	Heterogeneous nuclear ribonucleoproteins A2/B1 OS=Homo sapiens OX=9606	HNRNPA2B1			1.64077	0.10561	188.623	56	18	3721	15	353	37.4	8.95	53	67	58	49	55	49	72	81	79	69	76	71	1		4.13899	4.08967	4.10494	4.21782	4.52462	4.38119	4.35101	4.50973	4.36998
	0.36337	0.262899	1.19989	High	P23511	Nuclear transcription factor Y subunit alpha OS=Homo sapiens OX=9606	NFYA			0.692642	0.295942	13.155	5	1	52	1	347	36.9	8.94	2	3	2	3	2	1	2	3	1	1	3	1	1		-3.18685	-4.04543	-3.2674	-3.31494	-3.40834	-2.98771	-2.42399	-3.37111	-2.62768
	1.67947	0.262515	1.19957	High	P49411	Elongation factor Tu, mitochondrial OS=Homo sapiens OX=9606	TUFM			1.47413	0.123385	170.477	47	19	2020	19	452	49.5	7.61	101	119	135	121	116	120	119	131	127	129	146	136	1		5.77227	5.78259	5.8965	6.0065	6.19604	6.03637	6.162	6.00311	5.94031
	0.633186	0.260909	1.19823	High	Q9P2N5	RNA-binding protein 27 OS=Homo sapiens OX=9606	RBM27			0.266535	0.592479	8.956	4	2	20	2	1060	118.6	9.19	3	2	1	2	1	1	2	1	2	1	3	1	1		-1.39378	-1.26238	-1.23123	-1.27033	-0.683865	-1.15047	-1.18046	-0.85826	-1.57257
	1.88606	0.26054	1.19793	High	Q00403	Transcription initiation factor IIB OS=Homo sapiens OX=9606	GTF2B			2.33172	0.0591805	8.462	8	2	21	2	316	34.8	8.35	1		2		1		1	2	3	1		1	1		-1.01156	-0.952661	-1.1066	-0.838119	-0.694933	-0.75614	-0.962496	-0.961982	-0.966642
	1.82404	0.260422	1.19783	High	Q96C19	EF-hand domain-containing protein D2 OS=Homo sapiens OX=9606	EFHD2			2.35018	0.0591878	24.15	20	5	238	5	240	26.7	5.2	8	12	10	12	7	16	15	14	15	16	16	16	1		1.30586	1.1674	1.35028	1.47121	1.56155	1.57205	1.59906	1.51312	1.53603
	2.06416	0.260249	1.19769	High	Q6NZI2	Caveolae-associated protein 1 OS=Homo sapiens OX=9606	CAVIN1			2.68645	0.0550991	162.099	31	11	2170	11	390	43.5	5.6	36	52	38	35	41	38	49	59	49	64	50	46	1		3.86415	3.80336	3.88898	4.0221	4.1302	4.18493	4.41148	4.1861	4.40994
	1.15647	0.259772	1.19729	High	Q9BSD7	Cancer-related nucleoside-triphosphatase OS=Homo sapiens OX=9606	NTPCR			0.934375	0.211156	39.377	54	7	128	7	190	20.7	9.54	8	10	13	8	9	14	10	6	9	12	10	9	1		0.75681	0.861644	0.901315	0.920672	1.12706	1.25135	1.0774	0.853831	1.06077
	1.60572	0.259527	1.19709	High	P14927	Cytochrome b-c1 complex subunit 7 OS=Homo sapiens OX=9606	UQCRB			2.12356	0.0672143	33.814	50	7	555	7	111	13.5	8.78	18	20	19	16	21	24	20	27	31	28	25	23	1		1.79671	1.60005	1.68762	1.86628	2.02884	1.96783	2.16898	1.95978	2.15196
	1.11201	0.259014	1.19666	High	P05166	Propionyl-CoA carboxylase beta chain, mitochondrial OS=Homo sapiens OX=9606	PCCB			1.47194	0.123854	11.558	4	1	13	1	539	58.2	7.64			1	1		1	1	1	2	2	1	3	1		-3.23368	-3.37426	-3.01789	-3.0203	-2.91883	-2.90965	-2.95176	-2.85387	-2.91079
	0.57638	0.258803	1.19649	High	O00399	Dynactin subunit 6 OS=Homo sapiens OX=9606	DCTN6			0.533295	0.374398	17.69	9	1	14	1	190	20.7	6.32	2	2	1		2		1		3	2		1	1		-1.83498	-1.93038	-2.14185	-1.44787	-2.05037	-1.63257	-1.64022	-1.88221	-1.36735
	0.786128	0.25811	1.19591	High	Q13636	Ras-related protein Rab-31 OS=Homo sapiens OX=9606	RAB31			0.533814	0.374134	13.313	19	3	64	3	194	21.6	7.06	5	7	5	4	3	5	4	7	7	4	5	4	1		-0.10126	-0.262931	0.236037	0.263936	0.143456	0.238785	0.218422	-0.0786772	0.260725
	0.59421	0.257833	1.19568	High	Q6NXS1	Protein phosphatase inhibitor 2 family member B OS=Homo sapiens OX=9606	PPP1R2B			0.455811	0.421554	7.534	10	2	23	2	205	23.1	4.87	3	4	1	2	3	2	2			1	2	3	1		-0.889392	-1.43787	-0.886104	-0.914584	-0.696909	-0.828377	-1.03878	-0.898664	-1.65146
	1.39036	0.256353	1.19446	High	Q86Y82	Syntaxin-12 OS=Homo sapiens OX=9606	STX12			1.42014	0.127419	22.864	22	3	61	3	276	31.6	5.59	4	3	3	4	1	3	4	4	2	4	4	2	1		-0.12291	-0.39524	-0.191438	-0.0254316	0.0182457	0.0666561	0.0366077	-0.0375261	-0.10984
	1.27368	0.255994	1.19416	High	Q96TA2	ATP-dependent zinc metalloprotease YME1L1 OS=Homo sapiens OX=9606	YME1L1			1.99326	0.0747311	19.047	11	5	91	5	773	86.4	8.76	5	5	3	3	4	7	4	5	8	5	3	4	1		-0.863589	-0.597539	-0.743106	-0.555282	-0.507763	-0.373209	-0.382854	-0.395621	-0.388132
	1.81143	0.255672	1.19389	High	Q9Y6C9	Mitochondrial carrier homolog 2 OS=Homo sapiens OX=9606	MTCH2			2.31276	0.0592864	99.768	40	9	589	9	303	33.3	7.97	16	18	16	19	19	28	24	26	22	29	23	25	1		2.16027	2.10319	2.06974	2.25389	2.44023	2.40611	2.60371	2.50453	2.38674
	0.409455	0.255321	1.1936	High	Q68EM7	Rho GTPase-activating protein 17 OS=Homo sapiens OX=9606	ARHGAP17			0.508488	0.388215	8.776	5	3	48	3	881	95.4	7.62	5	5	5	5	4	5	2	8	2	1	1	3	1		3.38101	2.76528	2.8853	2.94119	3.58549	3.27088	3.71648	3.414	3.17031
	1.47445	0.25518	1.19348	High	O43678	NADH dehydrogenase [ubiquinone] 1 alpha subcomplex subunit 2 OS=Homo sapiens OX=9606	NDUFA2			1.96328	0.07656	17.723	40	3	293	3	99	10.9	9.57	11	11	12	11	19	13	15	14	16	15	12	17	1		0.838058	0.82478	0.645104	0.978166	1.12572	0.969591	1.2599	1.02867	1.18281
	0.835872	0.255138	1.19345	High	Q16718	NADH dehydrogenase [ubiquinone] 1 alpha subcomplex subunit 5 OS=Homo sapiens OX=9606	NDUFA5			1.26221	0.14919	56.872	58	4	357	4	116	13.5	5.99	14	9	13	11	16	13	11	20	15	15	12	12	1		1.15714	1.25919	0.952037	1.3254	1.58752	1.22086	1.57502	1.52368	1.40193
	1.14079	0.254998	1.19333	High	Q9H6V9	Lipid droplet-associated hydrolase OS=Homo sapiens OX=9606	LDAH			0.784604	0.264692	3.926	3	1	31	1	325	37.3	6.54	2	4	1	4	4	3	2	1	3	2	2	3	1		-3.19679	-3.32194	-3.41416	-2.91255	-3.05138	-3.20397	-2.85516	-3.29369	-2.75464
	1.35922	0.254562	1.19297	High	Q15629	Translocating chain-associated membrane protein 1 OS=Homo sapiens OX=9606	TRAM1			1.90776	0.0822903	43.968	23	5	306	5	374	43	9.63	16	10	17	15	16	13	17	20	19	14	19	17	1		0.990914	0.853055	0.753535	1.08791	1.04733	1.22594	1.1632	1.3599	1.49346
	1.12245	0.254446	1.19288	High	Q8ND76	Cyclin-Y OS=Homo sapiens OX=9606	CCNY			1.62432	0.107147	41.941	29	7	170	7	341	39.3	7.2	2	2	7	4	2	2	6	7	4	3	4	1	1		-1.14691	-1.18485	-0.965695	-1.00817	-0.744646	-0.7813	-0.778461	-0.730718	-0.808382
	2.09263	0.254081	1.19258	High	Q13505	Metaxin-1 OS=Homo sapiens OX=9606	MTX1			1.38342	0.129952	34.95	15	5	98	5	466	51.4	9.79	3	3	4	4	3	3	7	7	7	6	2	7	1		-0.113973	-0.155684	-0.00293064	0.113545	0.186733	0.189377	0.3465	0.0110674	0.364403
	0.248495	0.253799	1.19234	High	Q9BQ95	Evolutionarily conserved signaling intermediate in Toll pathway, mitochondrial OS=Homo sapiens OX=9606	ECSIT			0.131267	0.759286	19.947	17	3	13	3	431	49.1	6.29				1	1	1			1	1	1		1		-3.22909	-2.49735	-3.36582	-2.88501	-2.20937	-3.23648	-2.7341	-2.70218	-3.02392
	0.97726	0.253791	1.19234	High	Q5QNW6	Histone H2B type 2-F OS=Homo sapiens OX=9606	H2BC18			0.413899	0.454387	34.228	41	6	862	2	126	13.9	10.32	20	17	20	18	12	22	19	25	19	22	23	20	1		0.692878	0.730208	1.05592	1.11654	1.00228	1.12155	0.671822	1.07701	1.26452
	1.94515	0.253787	1.19233	High	Q96K37	Solute carrier family 35 member E1 OS=Homo sapiens OX=9606	SLC35E1			0.29698	0.560025	29.065	13	3	30	3	410	44.7	9.79	4	2	4	1	6	2	3	3	1	1		3	1		-1.38879	-1.23541	-1.30235	-1.12639	-1.01054	-1.02826	-0.981739	-1.65459	-0.872181
	0.954601	0.253547	1.19213	High	P01008	Antithrombin-III OS=Homo sapiens OX=9606	SERPINC1			0.71036	0.290404	4.128	2	1	109	1	464	52.6	6.71	9	8	9	7	5	6	7	8	8	10	6	7	1		0.73087	0.880755	0.969653	0.914941	1.25926	1.16772	0.881386	1.00057	1.17279
	1.55465	0.253135	1.19179	High	Q9BVT8	Transmembrane and ubiquitin-like domain-containing protein 1 OS=Homo sapiens OX=9606	TMUB1			1.70494	0.0986988	17.626	21	3	141	3	246	26.2	5.72	8	5	7	7	9	7	13	9	11	9	10	11	1		-0.321773	-0.403163	-0.355126	-0.20592	0.0311451	-0.145882	-0.142353	-0.0950556	-0.212706
	1.42788	0.253035	1.19171	High	P41208	Centrin-2 OS=Homo sapiens OX=9606	CETN2			1.07047	0.186963	6.117	8	1	62	1	172	19.7	5	3	3	2	1	2	2	2	3	2	2	2	1	1		-2.90336	-2.92275	-2.78725	-2.72366	-2.64694	-2.48365	-2.87817	-2.63172	-2.67095
	0.952639	0.252433	1.19121	High	Q13428	Treacle protein OS=Homo sapiens OX=9606	TCOF1			1.01221	0.198505	70.797	12	12	188	12	1488	152	9.04	7	7	5	4	5	8	6	4	9	12	4	2	1		2.47172	2.44909	2.51237	2.48851	2.81469	2.88729	2.8372	2.65593	2.70635
	1.38296	0.251671	1.19059	High	Q96PC5	Melanoma inhibitory activity protein 2 OS=Homo sapiens OX=9606	MIA2			1.68713	0.100211	8.39	3	3	10	3	1412	159.7	4.69		1	2	1	2	1				2		1	1		-3.45338	-3.4725	-3.25565	-3.04626	-3.1722	-3.20805	-3.19009	-3.01844	-2.99257
	0.377522	0.251577	1.19051	High	Q9H2V7	Protein spinster homolog 1 OS=Homo sapiens OX=9606	SPNS1			0.251425	0.606473	9.857	7	2	36	2	528	56.6	6.64	2	3	5	2	3	2	4	4	3	3	2	3	1		-3.51492	-2.62926	-2.9167	-2.96579	-2.70776	-2.6326	-2.86787	-2.77959	-2.87027
	1.37643	0.250776	1.18985	High	O00483	Cytochrome c oxidase subunit NDUFA4 OS=Homo sapiens OX=9606	NDUFA4			1.98021	0.0759292	21.78	58	3	168	3	81	9.4	9.38	8	7	7	8	10	9	11	9	13	12	9	12	1		1.21233	1.10074	0.923026	1.32231	1.3524	1.31371	1.49872	1.35605	1.57381
	0.108536	0.250155	1.18933	High	Q9Y2R4	Probable ATP-dependent RNA helicase DDX52 OS=Homo sapiens OX=9606	DDX52			0.0599779	0.874239	18.549	11	4	35	4	599	67.4	9.67													1	Acetyl [N-Term]	-3.68272	-3.21909	-5.18766	-4.82238	-2.80405	-3.71258	-3.21394	-3.81678	-3.95815
	1.15048	0.249366	1.18868	High	Q8TC07	TBC1 domain family member 15 OS=Homo sapiens OX=9606	TBC1D15			2.04419	0.0716117	9.127	4	3	53	3	691	79.4	5.67	1	6	4	4	4	6	4	5	4	2	3	3	1		0.229093	-0.0506792	0.0910368	0.249719	0.309099	0.458731	0.561619	0.437102	0.626568
	2.26738	0.248049	1.1876	High	Q15392	Delta(24)-sterol reductase OS=Homo sapiens OX=9606	DHCR24			2.69929	0.0552897	23.427	8	3	63	3	516	60.1	8.16	7	3	6	4	5	4	4	3	3	4	5	7	1		-0.64878	-0.506534	-0.611663	-0.31326	-0.366209	-0.343361	-0.287868	-0.394187	-0.323681
	1.14184	0.248046	1.1876	High	P08754	Guanine nucleotide-binding protein G(i) subunit alpha-3 OS=Homo sapiens OX=9606	GNAI3			1.50739	0.119402	46.389	28	8	981	3	354	40.5	5.69	21	22	27	22	21	28	32	28	26	32	26	28	1		0.287427	0.18529	-0.0429411	0.380877	0.345348	0.447687	0.371532	0.54416	0.646576
	2.33292	0.248015	1.18757	High	O60476	Mannosyl-oligosaccharide 1,2-alpha-mannosidase IB OS=Homo sapiens OX=9606	MAN1A2			2.57305	0.0565455	21.753	8	3	68	3	641	73	7.61	5	5	2	4	4	6	6	2	4	4	7	4	1		-1.18468	-1.27097	-1.28413	-0.95074	-1.05446	-0.990532	-0.815706	-0.813521	-1.00057
	1.0128	0.247932	1.1875	High	Q9NX62	Golgi-resident adenosine 3',5'-bisphosphate 3'-phosphatase OS=Homo sapiens OX=9606	BPNT2			0.920156	0.214743	9.593	15	3	136	3	359	38.7	6.86	4	8	6	8	7	10	6	6	6	7	7	12	1		-0.941817	-1.10044	-0.960345	-0.878087	-0.832932	-0.547791	-0.672232	-0.914552	-0.616882
	2.26306	0.247869	1.18745	High	P22695	Cytochrome b-c1 complex subunit 2, mitochondrial OS=Homo sapiens OX=9606	UQCRC2	+	Cluster -67	3.64248	0.0398182	131.735	35	10	893	10	453	48.4	8.63	33	43	42	33	44	40	31	48	41	54	44	46	1		2.78328	2.64691	2.74065	2.96547	2.93871	3.01026	3.2926	3.17635	3.36228
	1.98489	0.247111	1.18683	High	Q15006	ER membrane protein complex subunit 2 OS=Homo sapiens OX=9606	EMC2			2.83845	0.0557647	39.623	36	7	213	7	297	34.8	6.57	12	16	14	18	16	20	18	17	18	13	18	14	1		0.838302	0.857377	0.913184	1.10194	1.03963	1.20862	1.41666	1.21099	1.33409
	0.152398	0.246392	1.18624	High	Q9NUJ3	T-complex protein 11-like protein 1 OS=Homo sapiens OX=9606	TCP11L1			0.58144	0.348861	8.259	4	2	17	2	509	57	5.59	2	2	3	1	3	1	1	1	1			2	1		-3.22017	-2.19441	-4.1598	-3.35192	-2.79344	-2.68985	-3.68864	-4.13709	-3.71274
	0.680608	0.24638	1.18623	High	Q8IUF8	Ribosomal oxygenase 2 OS=Homo sapiens OX=9606	RIOX2			0.469624	0.413158	15.222	8	2	22	2	465	52.8	6.7	1	1	1	1	3	3	2	3	2	1	1	2	1		-2.81774	-3.1082	-2.89922	-2.97523	-2.55107	-2.55973	-2.75333	-2.63384	-2.95774
	0.208244	0.246126	1.18602	High	O95232	Luc7-like protein 3 OS=Homo sapiens OX=9606	LUC7L3			0.193132	0.676741	21.577	12	4	71	4	432	51.4	9.79	2	6		4	2	1	2	5	1	1	1		1		-2.87438	-2.2375	-3.22052	-3.16725	-1.93792	-2.48885	-2.78416	-2.75513	-3.18291
	1.11295	0.245813	1.18576	High	O95159	Zinc finger protein-like 1 OS=Homo sapiens OX=9606	ZFPL1			1.29378	0.144316	13.717	15	3	59	3	310	34.1	8.07	4	1	5	4	3	3	5	6	6	5	5	8	1		-1.43484	-1.43974	-1.36145	-1.29621	-1.23446	-0.967915	-1.22644	-1.15145	-1.08559
	1.03156	0.24543	1.18545	High	A5PLN9	Trafficking protein particle complex subunit 13 OS=Homo sapiens OX=9606	TRAPPC13			1.07307	0.186657	11.669	12	2	27	2	417	46.5	5.6	5	1	3	1	5	3	2	2	1	2	1	1	1		-2.95343	-2.82554	-2.9484	-2.80959	-2.71817	-2.46332	-2.3318	-2.64309	-2.69727
	0.584367	0.244485	1.18467	High	Q9BRZ2	E3 ubiquitin-protein ligase TRIM56 OS=Homo sapiens OX=9606	TRIM56			0.898007	0.221031	26.601	12	6	90	6	755	81.4	7.74		1	2	1	2	1	2	2	3	2		1	1		2.0482	1.59711	2.16978	2.13344	2.09965	2.31546	2.25489	2.27733	2.43321
	0.602974	0.244086	1.18434	High	Q5TA50	Ceramide-1-phosphate transfer protein OS=Homo sapiens OX=9606	CPTP			0.83184	0.243815	3.716	6	1	3	1	214	24.4	7.21	1		1		1								1		-0.690011	-0.64228	-0.693397	-0.671706	-0.0776062	-0.544117	-0.154045	-0.278352	-0.462498
	0.784756	0.243633	1.18397	High	O75880	Protein SCO1 homolog, mitochondrial OS=Homo sapiens OX=9606	SCO1			0.743788	0.276302	21.351	22	4	50	4	301	33.8	8.88	3	4	5	4	4	3	4	4	5	4	4	6	1		-0.0828791	0.0415869	-0.293555	0.0507784	0.33964	0.0056324	-0.114342	-0.265342	0.0116177
	1.30765	0.243521	1.18388	High	Q08722	Leukocyte surface antigen CD47 OS=Homo sapiens OX=9606	CD47			2.03791	0.0721548	10.205	9	3	176	3	323	35.2	7.21	6	7	6	8	5	7	6	5	9	4	7	8	1		0.944905	0.687474	0.839829	0.991246	1.06444	1.14709	1.28269	1.13655	1.17443
	0.248592	0.242662	1.18317	High	P50148	Guanine nucleotide-binding protein G(q) subunit alpha OS=Homo sapiens OX=9606	GNAQ			0.150462	0.732476	25.294	19	5	114	1	359	42.1	5.68	6	7	5	8	8	5	7	9	6	7	6	10	1		-3.07477	-3.39395	-2.83211	-2.42801	-3.55234	-2.59249	-2.8191	-3.41817	-3.1415
	0.35119	0.242238	1.18283	High	P62380	TATA box-binding protein-like 1 OS=Homo sapiens OX=9606	TBPL1			0.465278	0.416047	4.578	9	1	17	1	186	20.9	9.54		1	1	1	2	3	2	1	1	2	1	2	1		-3.32806	-3.7682	-3.80505	-3.29872	-3.02638	-3.84949	-3.62267	-3.69718	-4.15229
	0.859448	0.242172	1.18277	High	P61803	Dolichyl-diphosphooligosaccharide--protein glycosyltransferase subunit DAD1 OS=Homo sapiens OX=9606	DAD1			1.90055	0.0831787	6.674	19	2	73	2	113	12.5	7.08	4	1	1	2	2	3	2	2	4	2	4	5	1		-0.40916	-0.710256	-0.843091	-0.412704	-0.366346	-0.45694	0.0164986	-0.258611	-0.00343895
	0.663983	0.241723	1.1824	High	Q9P2W1	Homologous-pairing protein 2 homolog OS=Homo sapiens OX=9606	PSMC3IP			0.284562	0.572743	3.871	9	1	3	1	217	24.9	7.81					2							1	1		-4.59668	-4.64725	-5.09607	-4.524	-4.46826	-4.62257	-5.00604	-4.94659	-4.32981
	0.901416	0.241474	1.1822	High	Q8NFX7	Syntaxin-binding protein 6 OS=Homo sapiens OX=9606	STXBP6			1.15672	0.168631	16.803	30	4	92	4	210	23.5	9.04	7	9	5	4	2	7	6	7	10	7	11	9	1		-1.1517	-1.36497	-1.3837	-1.14417	-1.17322	-0.858553	-0.993217	-1.07893	-0.955015
	0.359078	0.240096	1.18107	High	Q96AA3	Protein RFT1 homolog OS=Homo sapiens OX=9606	RFT1			0.0853555	0.828098	4.459	2	1	82	1	541	60.3	8.85	5	5	6	6	6	6	5	8	4	8	8	7	1		-1.72178	-1.02559	-0.914981	-0.906489	-1.21135	-0.824228	-0.677738	-2.25672	-0.831205
	0.382643	0.239714	1.18076	High	Q6QNY1	Biogenesis of lysosome-related organelles complex 1 subunit 2 OS=Homo sapiens OX=9606	BLOC1S2			0.429983	0.441585	4.426	8	1	6	1	142	16	4.86	1	1		1	1	1						1	1		-2.98205	-3.35941	-2.57382	-2.68181	-2.98511	-2.52923	-2.90432	-2.41109	-2.46381
	1.10595	0.23958	1.18065	High	P38919	Eukaryotic initiation factor 4A-III OS=Homo sapiens OX=9606	EIF4A3			0.991057	0.20151	140.559	48	19	1165	15	411	46.8	6.73	46	58	54	58	45	65	60	49	50	45	41	51	1		4.03461	3.87854	3.86332	4.05147	4.11024	4.33351	4.00458	4.23968	4.24248
	0.663944	0.239424	1.18052	High	Q9H9T3	Elongator complex protein 3 OS=Homo sapiens OX=9606	ELP3			0.554735	0.361713	16.524	7	3	88	3	547	62.2	8.88	5	6	10	8	8	10	8	6	6	5	10	6	1		-1.21385	-1.69306	-1.27396	-1.27039	-1.053	-1.13921	-1.29272	-1.76602	-1.33294
	1.52834	0.239372	1.18048	High	Q9NQC3	Reticulon-4 OS=Homo sapiens OX=9606	RTN4			1.89076	0.0840525	253.22	38	24	2898	24	1192	129.9	4.5	61	69	67	68	81	93	82	101	97	103	110	123	1	Acetyl [N-Term]	5.3728	5.26365	5.2265	5.43613	5.51163	5.6333	5.53429	5.514	5.64601
	0.394278	0.239134	1.18028	High	P35249	Replication factor C subunit 4 OS=Homo sapiens OX=9606	RFC4			0.269065	0.58927	26.494	30	7	110	7	363	39.7	8.02	6	5	5	6	7	2	9	3	8	6	4	4	1		1.64224	1.70074	1.76812	1.60144	1.78877	2.43829	1.70018	1.89932	1.61826
	0.73532	0.238419	1.1797	High	P01112	GTPase HRas OS=Homo sapiens OX=9606	HRAS			0.743746	0.276183	39.302	31	5	350	1	189	21.3	5.31	21	15	20	24	22	17	22	19	16	20	19	23	1		-0.566653	-0.981397	-0.993876	-0.545182	-0.70484	-0.576649	-0.815044	-0.806886	-1.16077
	0.800526	0.237623	1.17905	High	P82663	28S ribosomal protein S25, mitochondrial OS=Homo sapiens OX=9606	MRPS25			0.660895	0.309022	8.526	14	2	26	2	173	20.1	8.82	3	1	2	2	2	2	3	3	2	2	2	2	1		-1.63428	-1.7172	-1.63966	-1.33734	-1.25046	-1.69047	-2.53528	-1.56986	-1.75887
	1.01492	0.237172	1.17868	High	Q8N4Q1	Mitochondrial intermembrane space import and assembly protein 40 OS=Homo sapiens OX=9606	CHCHD4			0.935785	0.211013	18.714	18	2	9	2	142	16	4.31		1	2		2				1		1	2	1		-2.79142	-2.48508	-2.69006	-2.31463	-2.40968	-2.53074	-2.48806	-2.40301	-2.56524
	1.96292	0.23622	1.1779	High	P20337	Ras-related protein Rab-3B OS=Homo sapiens OX=9606	RAB3B			2.64462	0.0541333	16.031	18	3	339	2	219	24.7	5.02	21	20	28	21	16	20	16	15	17	20	17	25	1		-0.800925	-0.943421	-0.780866	-0.581935	-0.622272	-0.612345	-0.432968	-0.580901	-0.46142
	0.132381	0.234625	1.1766	High	P62995	Transformer-2 protein homolog beta OS=Homo sapiens OX=9606	TRA2B			0.473572	0.411055	28.804	20	4	176	3	288	33.6	11.25													1	Met-loss+Acetyl [N-Term]	-3.53413	-5.53165	-5.08955	-4.94064	-4.39353	-4.11728	-4.39951	-3.43461	-3.57415
	1.70128	0.234407	1.17642	High	P48681	Nestin OS=Homo sapiens OX=9606	NES			2.11926	0.0678577	992.947	65	77	13149	77	1621	177.3	4.36	280	333	358	336	335	366	358	391	432	459	392	394	1	Acetyl [N-Term]	7.30583	7.4811	7.4892	7.63753	7.69534	7.64649	7.91557	7.76662	7.68793
	0.427588	0.234058	1.17614	High	P15374	Ubiquitin carboxyl-terminal hydrolase isozyme L3 OS=Homo sapiens OX=9606	UCHL3			0.242864	0.617094	71.55	53	7	120	7	230	26.2	4.92	9	7	12	11	9	11	6	8	9	13	10	11	1		1.1555	0.585664	0.969764	1.21314	0.825399	1.37457	1.20503	0.735456	0.933439
	0.620394	0.232683	1.17502	High	Q6UW02	Cytochrome P450 20A1 OS=Homo sapiens OX=9606	CYP20A1			0.614369	0.329449	14.496	9	3	29	3	462	52.4	6.21	1		2	5	5	6	1	2	2	2	1	2	1		-0.221431	-0.18513	-0.349996	-0.192031	-0.168705	0.302227	0.254004	-0.115224	-0.00596046
	1.02306	0.23268	1.17502	High	Q8IWR0	Zinc finger CCCH domain-containing protein 7A OS=Homo sapiens OX=9606	ZC3H7A			0.358154	0.502758	44.447	15	8	60	7	971	110.5	7.3	3		1	1	2	2	1	1	2		3		1		-0.599835	-0.718909	-0.590978	-0.554399	-0.218601	-0.438683	-0.461559	-0.284917	-0.887728
	1.20112	0.231869	1.17436	High	P63098	Calcineurin subunit B type 1 OS=Homo sapiens OX=9606	PPP3R1			1.92717	0.0790492	3.778	7	1	38	1	170	19.3	4.81	4	3	2	2	2	4	3	2	3	5	4	4	1		-1.45752	-1.54426	-1.58717	-1.23357	-1.46119	-1.19858	-1.21685	-1.15475	-1.00747
	1.67547	0.23178	1.17428	High	Q9Y512	Sorting and assembly machinery component 50 homolog OS=Homo sapiens OX=9606	SAMM50			2.37852	0.059373	86.37	41	13	499	13	469	51.9	6.9	16	14	16	17	26	13	19	18	22	20	15	20	1		1.63441	1.64286	1.67107	1.75857	1.92781	1.95729	2.15736	1.93685	2.10936
	1.78031	0.231749	1.17426	High	Q7L2E3	ATP-dependent RNA helicase DHX30 OS=Homo sapiens OX=9606	DHX30			2.35045	0.0594898	168.983	37	31	1060	31	1194	133.9	8.78	18	20	19	22	25	25	22	21	28	27	25	22	1		3.03139	2.97721	3.13721	3.21987	3.34016	3.28103	3.63757	3.39821	3.41577
	0.349851	0.231279	1.17387	High	Q96LJ7	Dehydrogenase/reductase SDR family member 1 OS=Homo sapiens OX=9606	DHRS1			0.285054	0.572644	8.692	9	1	9	1	313	33.9	7.83	1	1			1		1	1	2	1		1	1		-3.2994	-3.96362	-3.10045	-3.36535	-3.07146	-3.23282	-3.08698	-3.52138	-2.68792
	1.04605	0.230663	1.17337	High	Q04637	Eukaryotic translation initiation factor 4 gamma 1 OS=Homo sapiens OX=9606	EIF4G1			0.792787	0.260532	276.552	32	37	1740	33	1599	175.4	5.33	81	68	87	81	87	72	76	79	87	78	89	82	1		5.56066	5.53796	5.68235	5.73714	6.01096	5.72485	5.83207	5.73956	5.58513
	1.82447	0.230102	1.17292	High	O75976	Carboxypeptidase D OS=Homo sapiens OX=9606	CPD			2.01663	0.0730031	115.403	22	21	351	21	1380	152.8	6.05	30	24	18	20	32	20	29	21	33	34	18	39	1		1.89936	1.79841	1.95662	2.07916	2.08669	2.17884	2.13702	2.11384	2.30076
	0.209994	0.229205	1.17219	High	Q9BW83	Intraflagellar transport protein 27 homolog OS=Homo sapiens OX=9606	IFT27			0.124519	0.768599	7.553	19	2	6	2	186	20.5	5.41	1	1	1	1		1	1						1		-3.45596	-2.17146	-2.27262	-2.51361	-2.2173	-2.4815	-2.65143	-2.51737	-2.76646
	0.998167	0.228924	1.17196	High	O60934	Nibrin OS=Homo sapiens OX=9606	NBN			0.850228	0.238562	24.274	9	5	55	5	754	84.9	6.9	1		1		2		2	2	4		2		1		-1.19144	-1.24331	-1.26737	-1.21478	-0.884729	-0.915844	-0.995811	-1.13609	-1.16815
	1.71701	0.228184	1.17136	High	P06576	ATP synthase subunit beta, mitochondrial OS=Homo sapiens OX=9606	ATP5F1B			2.02194	0.0721514	486.9	77	28	4672	28	529	56.5	5.4	200	220	222	211	271	266	259	271	284	274	284	270	1		6.36909	6.3341	6.33105	6.58415	6.46581	6.66884	6.72623	6.54465	6.73262
	0.522052	0.227933	1.17116	High	Q92629	Delta-sarcoglycan OS=Homo sapiens OX=9606	SGCD			1.18157	0.163222	26.578	17	4	109	4	289	32.1	9.11	1	1		1	2	2	1	1	1	1	1	2	1		-1.79251	-2.23736	-1.64529	-1.75425	-1.71494	-1.52217	-1.48407	-1.45026	-1.2067
	1.17445	0.227846	1.17108	High	Q9P291	Armadillo repeat-containing X-linked protein 1 OS=Homo sapiens OX=9606	ARMCX1			1.39818	0.128571	45.201	26	10	296	10	453	49.2	9.22	8	15	7	11	9	13	11	13	12	12	15	15	1		1.94989	1.73279	2.00874	2.06379	2.12349	2.18767	2.09541	2.15069	2.2865
	0.333037	0.227784	1.17104	High	P28702	Retinoic acid receptor RXR-beta OS=Homo sapiens OX=9606	RXRB			0.194011	0.676021	10.475	8	3	26	1	533	56.9	8.18	4	1	4	3	2		5	1	3		1	2	1		-3.31959	-3.4996	-4.00803	-3.19481	-3.18307	-3.76599	-3.52496	-3.52093	-3.32075
	1.49123	0.227692	1.17096	High	Q9Y4W6	AFG3-like protein 2 OS=Homo sapiens OX=9606	AFG3L2			2.0491	0.0714248	63.939	22	11	270	11	797	88.5	8.66	16	15	16	12	17	16	19	18	19	18	15	22	1		1.18264	1.27076	1.37607	1.41888	1.5595	1.53416	1.60376	1.5299	1.71257
	0.656304	0.227521	1.17082	High	P46976	Glycogenin-1 OS=Homo sapiens OX=9606	GYG1			1.05762	0.188143	46.694	21	6	156	6	350	39.4	5.53	2	3	3	5	3	2	4	3	1	3	3	3	1		-1.03213	-1.39454	-0.868077	-0.853301	-0.911978	-0.846903	-0.740601	-0.734544	-0.778885
	0.500169	0.227241	1.17059	High	Q9H6B4	CXADR-like membrane protein OS=Homo sapiens OX=9606	CLMP			0.472505	0.411477	10.405	7	1	43	1	373	41.3	7.99	2	3	3	2	3	2	2	3	2	3	2	2	1		-3.23454	-3.80067	-3.79225	-3.2689	-3.38061	-3.49622	-3.19003	-3.46632	-3.38741
	0.262361	0.226836	1.17027	High	P05386	60S acidic ribosomal protein P1 OS=Homo sapiens OX=9606	RPLP1			0.110077	0.789687	30.508	38	2	216	2	114	11.5	4.32	5	8	6	7	2	7	6	12	8	9	8	7	1	Met-loss+Acetyl [N-Term]	-0.0357294	-0.31055	-0.383529	-0.257501	-0.424536	0.632736	0.247501	-0.121474	-0.387579
	1.63013	0.226416	1.16993	High	Q8WZ42	Titin OS=Homo sapiens OX=9606	TTN			2.46488	0.0633642	14.006	0	4	25	4	34350	3813.7	6.35					2		3	2	2	1	1	1	1		2.49393	2.34757	2.54471	2.68755	2.72906	2.64885	2.80049	2.77886	2.72757
	0.413527	0.226307	1.16984	High	Q9H0R8	Gamma-aminobutyric acid receptor-associated protein-like 1 OS=Homo sapiens OX=9606	GABARAPL1			0.308382	0.549605	8.959	21	2	124	1	117	14	8.73	5	7	5	9	7	9	9	8	4	7	5	11	1		-4.39524	-3.97633	-4.03221	-3.89291	-4.24849	-3.58346	-4.24975	-6.5591	-3.64755
	1.0084	0.226255	1.16979	High	Q9H9B4	Sideroflexin-1 OS=Homo sapiens OX=9606	SFXN1			0.835751	0.242246	49.173	28	7	655	5	322	35.6	9.07	34	40	41	47	38	45	41	34	36	41	38	40	1		2.09224	2.34737	2.21905	2.33964	2.59123	2.40656	2.50142	2.26581	2.44707
	0.134514	0.225833	1.16945	High	Q49A26	Cytokine-like nuclear factor N-PAC OS=Homo sapiens OX=9606	GLYR1			0.345687	0.513447	55.064	25	9	76	9	553	60.5	9.17													1		-5.31117	-3.95113	-5.03249	-4.30414	-3.88754	-5.42561	-3.12441	-4.2936	-4.47299
	0.524289	0.225823	1.16944	High	O95248	Myotubularin-related protein 5 OS=Homo sapiens OX=9606	SBF1			0.355648	0.504324	15.636	3	3	13	3	1868	208.3	6.9			1		1	2	2			2		2	1		-1.22538	-1.21268	-1.7748	-1.1002	-1.21366	-1.22153	-1.19168	-1.47644	-1.33647
	0.100447	0.22574	1.16938	High	Q9H0S4	Probable ATP-dependent RNA helicase DDX47 OS=Homo sapiens OX=9606	DDX47			0.139988	0.746595	32.374	23	7	106	7	455	50.6	9.1							1						1	Met-loss+Acetyl [N-Term]	-3.13197	-3.72246	-3.79094	-3.24499	-2.01358	-4.70957	-3.00321	-3.60571	-2.23882
	0.510106	0.225599	1.16926	High	Q9BUP3	Oxidoreductase HTATIP2 OS=Homo sapiens OX=9606	HTATIP2			0.18055	0.692549	13.466	14	2	43	2	242	27	8.38	4	5	5	4	2	4	4	4	3	1	2	5	1		-2.5723	-2.01694	-2.13321	-1.95812	-1.88766	-2.19987	-2.60653	-1.86531	-2.02
	1.23406	0.224822	1.16863	High	P20340	Ras-related protein Rab-6A OS=Homo sapiens OX=9606	RAB6A			2.3577	0.0600829	44.973	38	6	538	4	208	23.6	5.54	30	26	33	29	29	30	26	26	33	36	31	37	1		0.849629	0.735669	1.02554	1.12403	1.07755	1.08372	1.27398	1.23246	1.34366
	1.78622	0.224053	1.16801	High	P11279	Lysosome-associated membrane glycoprotein 1 OS=Homo sapiens OX=9606	LAMP1			1.87548	0.0852134	44.567	17	7	667	7	417	44.9	8.75	32	35	37	39	35	32	34	40	31	29	36	39	1		3.77137	3.84153	3.85751	3.98117	4.14466	4.01674	4.04222	4.03189	4.21101
	1.1325	0.223391	1.16747	High	Q96RD7	Pannexin-1 OS=Homo sapiens OX=9606	PANX1			1.86764	0.0855291	6.572	3	1	39	1	426	48	6.01	2	2	2	2	3	3	3	3	2	2	2	3	1		-3.09633	-2.96183	-3.13189	-2.9057	-2.92763	-2.68655	-3.13574	-3.18955	-3.18641
	0.241067	0.223024	1.16718	High	O95182	NADH dehydrogenase [ubiquinone] 1 alpha subcomplex subunit 7 OS=Homo sapiens OX=9606	NDUFA7			0.420945	0.449564	26.352	34	3	70	3	113	12.5	10.18	2	4	3	4	4	4	2	2	5	3	3	2	1		-0.119643	-0.321677	-1.04812	0.00968456	-0.732424	-0.0976238	0.0833893	-0.262492	0.112398
	0.695179	0.22282	1.16701	High	Q9UN86	Ras GTPase-activating protein-binding protein 2 OS=Homo sapiens OX=9606	G3BP2			1.23959	0.154158	105.764	30	11	562	11	482	54.1	5.55	8	8	5	7	5	5	8	8	7	11	7	7	1		2.0487	1.64478	2.09797	2.10279	2.16314	2.19398	2.47738	2.25844	2.27846
	0.397091	0.222519	1.16677	High	P55196	Afadin OS=Homo sapiens OX=9606	AFDN			0.410339	0.456814	13.65	2	2	15	2	1824	206.7	6.47	2	1	1	1	4	1	2		1		1		1		-4.01176	-3.29417	-3.73838	-3.50745	-3.24637	-3.62293	-4.04126	-3.34165	-4.47464
	1.12166	0.222338	1.16662	High	Q02978	Mitochondrial 2-oxoglutarate/malate carrier protein OS=Homo sapiens OX=9606	SLC25A11			1.58962	0.10868	85.978	48	11	870	11	314	34	9.91	29	35	31	26	35	36	33	41	43	45	47	43	1		2.34023	2.20623	2.31045	2.4744	2.38238	2.66715	2.63935	2.55698	2.85794
	0.806604	0.222278	1.16657	High	Q96SL1	Solute carrier family 49 member 4 OS=Homo sapiens OX=9606	SLC49A4			0.760931	0.270828	4.48	3	1	9	1	478	52.1	8.47	1						1	1	1	1	1	2	1		-3.49307	-3.62438	-3.2901	-3.40377	-3.21219	-3.12476	-2.99473	-3.42387	-2.90127
	0.424827	0.222072	1.16641	High	Q8NDV7	Trinucleotide repeat-containing gene 6A protein OS=Homo sapiens OX=9606	TNRC6A			0.175752	0.70015	11.648	3	3	8	3	1962	210.2	7.01		1											1		-3.69178	-3.55659	-3.51769	-3.10236	-3.20097	-3.79652	-3.2925	-3.37689	-4.17755
	0.401921	0.221668	1.16608	High	Q9GZP9	Derlin-2 OS=Homo sapiens OX=9606	DERL2			0.406179	0.46098	18.19	13	1	20	1	239	27.5	7.28	1	2	1	1	1	2	2	1	2	1	1	1	1		-0.818109	-0.137282	-0.132827	-0.244454	-0.07794	-0.100821	-0.0865059	-0.0216303	-0.172207
	1.0808	0.221615	1.16604	High	O43772	Mitochondrial carnitine/acylcarnitine carrier protein OS=Homo sapiens OX=9606	SLC25A20			1.29827	0.143941	15.725	16	3	68	3	301	32.9	9.41	4	4	6	4	4	2	3	3	4	2	5	4	1	Met-loss+Acetyl [N-Term]	-0.501536	-0.408023	-0.483378	-0.322455	-0.0591354	-0.346502	-0.280437	-0.211446	-0.109642
	0.917358	0.221367	1.16584	High	P53985	Monocarboxylate transporter 1 OS=Homo sapiens OX=9606	SLC16A1			0.944282	0.209439	51.277	15	5	272	5	500	53.9	8.66	13	14	10	15	13	8	15	13	10	10	14	12	1		0.818864	1.04787	0.958526	1.02442	1.33421	1.13074	1.10247	1.11113	1.13647
	0.387502	0.220019	1.16475	High	Q9BSY4	Coiled-coil-helix-coiled-coil-helix domain-containing protein 5 OS=Homo sapiens OX=9606	CHCHD5			0.335017	0.523184	27.233	54	4	60	4	110	12.4	6.73	2	4	4	3	3	4	5	5	5	4	5	4	1		-0.932496	-0.254344	-0.342654	-0.447927	-0.0804749	-0.341036	-0.441475	-0.178485	-0.132902
	1.69934	0.219867	1.16463	High	Q9HB90	Ras-related GTP-binding protein C OS=Homo sapiens OX=9606	RRAGC			2.57696	0.0566412	25.785	18	6	161	6	399	44.2	5.1	4	6	3	7	4	4	7	9	3	5	4	8	1		-0.588832	-0.744077	-0.775342	-0.496749	-0.461714	-0.490187	-0.371029	-0.426763	-0.306913
	0.825891	0.219325	1.16419	High	Q9NR28	Diablo IAP-binding mitochondrial protein OS=Homo sapiens OX=9606	DIABLO			1.24049	0.154135	28.799	26	6	172	6	239	27.1	5.9	16	11	14	10	14	14	15	14	13	10	14	15	1		3.58385	3.42488	3.81668	3.74794	3.91044	3.82501	3.9855	3.84062	3.97674
	1.10642	0.219067	1.16398	High	Q9Y3D7	Mitochondrial import inner membrane translocase subunit TIM16 OS=Homo sapiens OX=9606	PAM16			0.306814	0.5513	14.647	33	2	54	2	125	13.8	9.7	5	4	4	3	6	5	7	1	3	5	4	4	1	Met-loss+Acetyl [N-Term]	-2.15013	-2.08499	-2.28904	-1.90485	-2.09598	-1.86614	-1.74115	-2.40171	-2.01559
	0.490553	0.218503	1.16353	High	Q92600	CCR4-NOT transcription complex subunit 9 OS=Homo sapiens OX=9606	CNOT9			0.524794	0.379134	13.279	19	3	47	3	299	33.6	8.03	4	2	1	3	4	1	2	2	3	4	1	2	1		-1.35398	-1.62644	-1.80584	-1.32727	-1.6454	-1.15808	-1.08364	-1.19342	-1.53032
	2.04642	0.217819	1.16297	High	Q9UIJ7	GTP:AMP phosphotransferase AK3, mitochondrial OS=Homo sapiens OX=9606	AK3			1.63124	0.106303	52.849	41	8	187	8	227	25.6	9.16	6	12	14	9	15	17	12	17	7	20	17	13	1		1.30902	1.41287	1.39615	1.54586	1.65418	1.57146	1.65329	1.47837	1.71584
	0.990534	0.217763	1.16293	High	Q16629	Serine/arginine-rich splicing factor 7 OS=Homo sapiens OX=9606	SRSF7			0.911624	0.217763	36.426	21	5	451	4	238	27.4	11.82	8	5	5	5	4	5	8	5	7	7	6	6	1		0.236714	0.133683	0.31437	0.275777	0.575031	0.487249	0.33947	0.341905	0.466312
	0.994206	0.217394	1.16263	High	Q14444	Caprin-1 OS=Homo sapiens OX=9606	CAPRIN1			1.48333	0.122036	116.54	20	10	1331	10	709	78.3	5.25	34	38	30	34	32	34	43	36	50	52	40	39	1		2.27215	2.13645	2.08201	2.31767	2.55024	2.27487	2.89107	2.69514	2.41137
	1.2463	0.216758	1.16212	High	Q7Z406	Myosin-14 OS=Homo sapiens OX=9606	MYH14			1.32204	0.139529	80.885	4	9	1671	1	1995	227.7	5.6	77	75	80	88	75	85	81	77	81	90	88	82	1		2.11622	2.00541	2.26361	2.28432	2.35443	2.39677	2.25909	2.31431	2.38317
	0.765897	0.21673	1.1621	High	Q9BT22	Chitobiosyldiphosphodolichol beta-mannosyltransferase OS=Homo sapiens OX=9606	ALG1			1.36281	0.13389	19.37	11	4	68	4	464	52.5	7.23	3	8	8	4	2	8	5	5	5	6	5	5	1		-1.07468	-1.22104	-1.00165	-0.945132	-1.03932	-0.662722	-0.671576	-0.801156	-0.725637
	1.03	0.216684	1.16206	High	Q9Y399	28S ribosomal protein S2, mitochondrial OS=Homo sapiens OX=9606	MRPS2			1.79374	0.091	36.912	20	6	207	6	296	33.2	9.26	12	8	15	13	12	12	11	14	15	10	10	16	1		0.732896	0.907557	0.671651	0.874837	1.11287	0.974453	1.20488	1.05095	1.19337
	0.308264	0.216679	1.16206	High	Q8IVS2	Malonyl-CoA-acyl carrier protein transacylase, mitochondrial OS=Homo sapiens OX=9606	MCAT			0.272648	0.586254	10.162	5	1	37	1	390	42.9	8.72	3	2	5	1	2	2	2	4	5	2	5	4	1		-3.21711	-2.64708	-3.48994	-3.18334	-2.80343	-2.71732	-3.09362	-3.15718	-3.23676
	1.02082	0.216665	1.16204	High	Q8NC54	Keratinocyte-associated transmembrane protein 2 OS=Homo sapiens OX=9606	KCT2			0.609684	0.330924	13.109	13	3	19	3	265	29.2	5.08	1	2	2	1	1	1	1		1		1	1	1		-2.43203	-2.41388	-2.38021	-2.38863	-2.08355	-2.10395	-2.52193	-2.31817	-2.16898
	0.108094	0.216303	1.16175	High	Q15397	Pumilio homolog 3 OS=Homo sapiens OX=9606	PUM3			0.485304	0.403544	24.841	9	4	63	4	648	73.5	9.64							1	1		2	1		1		-3.17298	-2.74808	-5.00652	-3.32183	-3.82317	-3.13368	-2.53876	-1.55579	-3.41547
	1.07763	0.2156	1.16119	High	P01308	Insulin OS=Homo sapiens OX=9606	INS			0.770008	0.269306	14.968	19	1	292	1	110	12	5.3	6	8	9	7	4	10	13	10	6	9	11	12	1		0.941014	1.07873	1.04128	1.06728	1.30882	1.33172	0.940077	1.18402	1.16045
	0.890499	0.214809	1.16055	High	Q96BW9	Phosphatidate cytidylyltransferase, mitochondrial OS=Homo sapiens OX=9606	TAMM41			1.12486	0.175943	12.791	7	2	45	2	452	51	7.94	5	3	5	3	4	5	2	5	5	2	3	3	1		-1.33691	-1.37693	-1.25478	-1.25103	-1.1734	-0.899757	-0.979235	-1.14632	-1.02097
	0.439746	0.213793	1.15973	High	Q92503	SEC14-like protein 1 OS=Homo sapiens OX=9606	SEC14L1			1.48389	0.122127	5.644	3	1	11	1	715	81.2	6.43	1			1		2	3	2	1		1		1		-3.69135	-3.298	-3.76927	-3.66999	-3.24034	-3.2069	-3.78729	-4.79127	-4.76381
	0.529002	0.213632	1.1596	High	P35052	Glypican-1 OS=Homo sapiens OX=9606	GPC1			1.22513	0.156575	60.222	28	9	271	9	558	61.6	7.3	3	4				1	2		1	1	2	1	1		-0.748115	-1.2921	-1.18921	-0.954185	-0.74604	-0.888304	-0.725786	-0.517241	-0.576866
	1.27179	0.213514	1.15951	High	P10321	HLA class I histocompatibility antigen, C alpha chain OS=Homo sapiens OX=9606	HLA-C			1.50376	0.119595	39.767	21	5	375	1	366	40.6	6.04	16	20	17	17	21	20	17	20	17	25	17	18	1		1.708	1.49426	1.60827	1.83965	1.72333	1.88808	1.7906	1.80139	1.90527
	1.27369	0.213368	1.15939	High	Q9Y619	Mitochondrial ornithine transporter 1 OS=Homo sapiens OX=9606	SLC25A15			1.82603	0.0867678	8.287	5	1	51	1	301	32.7	9.13	3	3	3	2	2	2	3	3	3	2	2	3	1		-3.64688	-3.60477	-3.77525	-3.36164	-3.45739	-3.56777	-3.34295	-3.35187	-3.07731
	1.59335	0.213214	1.15927	High	P10644	cAMP-dependent protein kinase type I-alpha regulatory subunit OS=Homo sapiens OX=9606	PRKAR1A			2.23174	0.062521	71.393	31	11	481	9	381	43	5.35	25	31	27	27	25	37	32	28	31	33	29	34	1		2.75628	2.56949	2.70175	2.92503	2.83778	2.90436	2.99478	2.94894	3.13329
	0.208788	0.213165	1.15923	High	Q9UHX3	Adhesion G protein-coupled receptor E2 OS=Homo sapiens OX=9606	ADGRE2			0.121557	0.773186	13.584	5	2	25	1	823	90.4	6.87	1	1	3	1	3	1	3	3	3	2	1	1	1		-3.58225	-2.86666	-3.61634	-2.5348	-3.33101	-3.55995	-3.16693	-3.16961	-3.08015
	0.353847	0.210931	1.15743	High	O14548	Cytochrome c oxidase subunit 7A-related protein, mitochondrial OS=Homo sapiens OX=9606	COX7A2L			0.548821	0.364408	21.161	40	2	23	2	114	12.6	9.42	2		1	1	1	1	1	1			1	1	1		-2.16788	-2.04489	-2.3799	-2.12932	-1.54066	-2.2899	-1.87321	-1.71137	-1.90464
	1.70435	0.210882	1.1574	High	Q96QD8	Sodium-coupled neutral amino acid symporter 2 OS=Homo sapiens OX=9606	SLC38A2			1.66336	0.102251	28.144	12	3	157	3	506	56	8	6	5	4	4	4	6	6	5	6	6	6	8	1		0.612205	0.497767	0.441831	0.715861	0.69216	0.776428	0.626398	0.78489	0.771753
	0.737455	0.210824	1.15735	High	Q9UI09	NADH dehydrogenase [ubiquinone] 1 alpha subcomplex subunit 12 OS=Homo sapiens OX=9606	NDUFA12			0.977995	0.203846	28.892	39	5	178	5	145	17.1	9.63	4	8	7	10	5	8	9	7	8	8	8	5	1	Acetyl [N-Term]	-0.698878	-1.01045	-1.02907	-0.842601	-0.679688	-0.583639	-0.503799	-0.630628	-0.712873
	1.7713	0.210783	1.15732	High	P62266	40S ribosomal protein S23 OS=Homo sapiens OX=9606	RPS23			1.06832	0.187222	47.129	36	5	328	5	143	15.8	10.49	2	1	3	4	3	3	5	3	4	4	5	3	1		0.227094	0.236493	0.095891	0.342572	0.437061	0.412193	0.270107	0.517535	0.268843
	1.68455	0.210529	1.15711	High	Q00325	Phosphate carrier protein, mitochondrial OS=Homo sapiens OX=9606	SLC25A3			1.89794	0.0832698	95.941	30	11	1052	11	362	40.1	9.38	47	57	57	61	54	62	66	67	61	67	57	70	1		3.7883	3.68812	3.84813	3.92663	3.99146	4.03804	4.04502	4.02264	4.25217
	0.852117	0.210288	1.15692	High	P26373	60S ribosomal protein L13 OS=Homo sapiens OX=9606	RPL13			1.51411	0.118162	62.891	35	8	1592	8	211	24.2	11.65	43	39	41	38	48	44	49	39	38	45	46	53	1		4.38321	4.17148	4.51118	4.45125	4.60852	4.63697	4.70758	4.70199	4.67098
	0.800652	0.20925	1.15609	High	Q92947	Glutaryl-CoA dehydrogenase, mitochondrial OS=Homo sapiens OX=9606	GCDH			0.650471	0.312846	39.245	26	6	99	6	438	48.1	8.06	6	11	9	7	8	7	6	9	4	4	7	9	1		-0.254317	-0.163222	-0.543101	-0.133189	-0.163628	-0.0360737	-0.560629	-0.132537	-0.451483
	0.456334	0.208672	1.15562	High	P50995	Annexin A11 OS=Homo sapiens OX=9606	ANXA11			0.746823	0.275186	83.346	30	13	766	12	505	54.4	7.65	11	8	3	6	8	6	17	9	17	11	11	4	1		1.76979	1.24959	1.31094	1.46063	1.83929	1.65641	1.92621	1.83826	1.67428
	1.35463	0.208368	1.15538	High	Q9NPA0	ER membrane protein complex subunit 7 OS=Homo sapiens OX=9606	EMC7			1.61658	0.107922	20.632	20	3	147	3	242	26.5	9.25	10	6	8	7	11	9	4	7	9	8	6	11	1		0.969378	0.794986	0.943002	1.11004	1.02955	1.19288	1.11476	1.13102	1.29592
	0.809412	0.208259	1.15529	High	O43493	Trans-Golgi network integral membrane protein 2 OS=Homo sapiens OX=9606	TGOLN2			0.733148	0.279971	10.522	5	2	55	2	437	45.9	5.63	5	4	3	4	5	6	4	4	4	5	4	2	1		-0.333743	-0.509191	-0.474441	-0.0635576	-0.201021	-0.428019	-0.28371	-0.336791	-0.168093
	0.1143	0.207882	1.15499	High	Q00613	Heat shock factor protein 1 OS=Homo sapiens OX=9606	HSF1			0.486364	0.402709	19.98	8	2	35	2	529	57.2	5.19	2	2	4	3	1	2	5	4	3	3	4	2	1		-3.86162	-3.65217	-2.30903	-3.79405	-2.2545	-3.15064	-3.75241	-4.01846	-4.00397
	1.88472	0.207539	1.15472	High	Q16698	2,4-dienoyl-CoA reductase [(3E)-enoyl-CoA-producing], mitochondrial OS=Homo sapiens OX=9606	DECR1			2.25118	0.0624483	81.213	38	9	468	9	335	36	9.28	27	28	34	32	24	25	24	29	26	19	28	21	1		2.76048	2.78531	2.8146	2.99749	2.91292	3.0726	3.08503	3.07545	3.28738
	0.588509	0.207212	1.15446	High	P02765	Alpha-2-HS-glycoprotein OS=Homo sapiens OX=9606	AHSG			0.395054	0.469309	6.861	5	2	115	2	367	39.3	5.72	7	3	4	5	5	4	4	3	4	3	5	6	1		0.0139627	-0.28124	-0.260129	-0.210338	0.0956802	0.208889	0.0108299	-0.207366	0.0329437
	3.34781	0.206867	1.15418	High	Q5UCC4	ER membrane protein complex subunit 10 OS=Homo sapiens OX=9606	EMC10	+	Cluster -67	3.39731	0.0370588	7.09	10	2	90	2	262	27.3	6.13	5	4	3	2	4	6	4	7	5	6	6	6	1		-0.560231	-0.580174	-0.563882	-0.347842	-0.39786	-0.337984	-0.344433	-0.295058	-0.219805
	0.782751	0.206794	1.15412	High	P06241	Tyrosine-protein kinase Fyn OS=Homo sapiens OX=9606	FYN			1.76634	0.0925463	46.484	20	7	380	4	537	60.7	6.67	13	12	16	16	13	18	14	15	13	14	18	13	1		-0.272754	-0.520738	-0.638694	-0.377334	-0.250572	-0.183897	-0.0625267	-0.0467253	-0.0787506
	1.11017	0.206749	1.15408	High	Q96HY6	DDRGK domain-containing protein 1 OS=Homo sapiens OX=9606	DDRGK1			1.35459	0.135387	35.172	20	4	149	4	314	35.6	5.12	8	6	8	11	10	10	8	9	9	8	9	9	1		-0.423539	-0.227658	-0.379949	-0.146575	-0.020977	-0.243347	0.0325851	-0.187598	0.00858879
	1.06302	0.206721	1.15406	High	Q9HBH5	Retinol dehydrogenase 14 OS=Homo sapiens OX=9606	RDH14			1.72628	0.0965135	10.101	13	3	45	3	336	36.8	8.79	5	2	6	3	6	4	3	2	5	5	1	3	1		-0.890193	-0.923398	-0.714892	-0.616469	-0.756453	-0.535398	-0.499712	-0.458806	-0.590725
	0.441318	0.205191	1.15284	High	Q9H0X9	Oxysterol-binding protein-related protein 5 OS=Homo sapiens OX=9606	OSBPL5			0.422142	0.448526	6.082	3	2	8	1	879	98.6	7.47		2	1		1			3	1				1		-4.51979	-4.81121	-4.44979	-4.41466	-4.08852	-4.66203	-4.52539	-4.59498	-4.79232
	0.110993	0.205119	1.15278	High	Q8ND24	RING finger protein 214 OS=Homo sapiens OX=9606	RNF214			0.0434769	0.905405	18.464	10	4	45	4	703	77.6	6.95	3	6	3	1	4	4	3	1	1	4	1	2	1		-1.8853	-1.8981	-3.38366	-1.81859	-1.65875	-3.07437	-2.52313	-1.90475	-2.03314
	0.593485	0.204722	1.15246	High	P00403	Cytochrome c oxidase subunit 2 OS=Homo sapiens OX=9606	MT-CO2			1.16888	0.165873	74.887	38	5	851	5	227	25.5	4.82	24	23	26	24	26	33	29	29	34	42	30	35	1		2.50663	2.32425	2.06319	2.39455	2.6703	2.44338	2.91334	2.66926	2.61129
	0.737713	0.20435	1.15217	High	Q6SZW1	NAD(+) hydrolase SARM1 OS=Homo sapiens OX=9606	SARM1			1.10074	0.180724	23.996	11	7	86	7	724	79.3	6.55	7	4	6	2	7	4	3	8	3	3	2	7	1		-0.448874	-0.464253	-0.612267	-0.224971	-0.155113	-0.532263	-0.225147	-0.268163	-0.0482121
	1.40489	0.204332	1.15215	High	Q15031	Leucine--tRNA ligase, mitochondrial OS=Homo sapiens OX=9606	LARS2			1.56927	0.111463	27.101	13	7	72	7	903	101.9	8.22	9	5	5	8	8	10		7	4	6	4	6	1		0.0413828	0.113494	0.252109	0.322927	0.394276	0.30278	0.374348	0.270032	0.404665
	0.213261	0.203907	1.15181	High	O60832	H/ACA ribonucleoprotein complex subunit DKC1 OS=Homo sapiens OX=9606	DKC1			0.578006	0.350624	45.295	17	5	81	5	514	57.6	9.42	1	1	2	1	1	1	3		4	4	4	2	1		-1.0023	-0.951835	-1.33497	-0.756364	-0.363794	-1.55723	-0.0233688	-0.381555	-0.90777
	0.664898	0.203878	1.15179	High	Q9Y2Q9	28S ribosomal protein S28, mitochondrial OS=Homo sapiens OX=9606	MRPS28			0.316081	0.542556	26.196	28	4	135	4	187	20.8	9.1	5	9	6	9	5	15	7	7	8	11	8	10	1		-0.0820456	-0.363757	0.0873461	0.0503092	0.029583	0.173286	-0.16848	-0.157783	0.246237
	1.89478	0.203847	1.15177	High	Q96IX5	ATP synthase membrane subunit K, mitochondrial OS=Homo sapiens OX=9606	ATP5MK			2.81498	0.0545652	4.942	17	1	37	1	58	6.5	9.76	3		2	2	1	1	3	2	2	3	2		1		1.23811	1.17386	1.08811	1.36919	1.4045	1.33794	1.52017	1.42636	1.55096
	0.567775	0.202876	1.15099	High	Q6IAN0	Dehydrogenase/reductase SDR family member 7B OS=Homo sapiens OX=9606	DHRS7B			0.373497	0.489161	11.589	8	2	40	2	325	35.1	9.55	4	2	3	4	3	4	5	4	2	4	1	4	1		-2.6819	-2.85849	-2.71388	-2.75016	-2.63832	-2.25716	-2.58013	-2.77031	-2.47285
	2.31199	0.202829	1.15095	High	Q969V3	Nicalin OS=Homo sapiens OX=9606	NCLN	+	Cluster -67	3.61949	0.0386667	87.682	33	14	502	14	563	62.9	6.89	21	14	21	19	18	20	26	23	28	20	26	26	1		1.79179	1.79973	1.70609	1.96536	2.00472	1.93602	2.07091	2.03006	2.05544
	1.36137	0.201684	1.15004	High	Q99584	Protein S100-A13 OS=Homo sapiens OX=9606	S100A13			1.09383	0.181955	29.498	40	5	529	5	98	11.5	6.16	20	22	26	27	23	27	18	26	22	21	24	21	1		2.25507	2.0572	2.12719	2.27849	2.4088	2.35723	2.58645	2.4287	2.23632
	1.09311	0.201489	1.14988	High	Q8IWA5	Choline transporter-like protein 2 OS=Homo sapiens OX=9606	SLC44A2			1.458	0.125349	32.153	10	6	182	6	706	80.1	8.57	11	11	10	10	16	9	14	15	12	10	10	13	1		0.760133	0.68897	0.870486	0.843743	1.07633	1.00398	0.9582	1.06308	1.12215
	0.6113	0.201475	1.14987	High	Q99519	Sialidase-1 OS=Homo sapiens OX=9606	NEU1			0.685423	0.29887	65.566	28	9	600	9	415	45.4	5.88	11	12	11	10	11	12	9	10	10	13	16	17	1		1.0856	0.645148	1.00356	1.12683	1.20889	1.00301	1.17197	1.04701	1.45071
	0.75933	0.200897	1.14941	High	Q9Y2H5	Pleckstrin homology domain-containing family A member 6 OS=Homo sapiens OX=9606	PLEKHA6			0.384038	0.480307	87.266	24	14	188	14	1048	117.1	9.1	3	3	1	2	5	2	2	2	1	3	3	2	1		0.710412	0.305844	0.524428	0.66245	0.703392	0.777533	0.703802	0.678815	0.294102
	1.1864	0.200336	1.14897	High	Q9HC07	Transmembrane protein 165 OS=Homo sapiens OX=9606	TMEM165			1.76247	0.0924619	34.048	19	4	101	4	324	34.9	7.02	9	5	9	6	8	4	9	8	6	8	6	9	1		1.02923	1.09444	1.20606	1.18998	1.36257	1.37818	1.44333	1.4434	1.32483
	1.41835	0.200061	1.14875	High	P45877	Peptidyl-prolyl cis-trans isomerase C OS=Homo sapiens OX=9606	PPIC			0.833808	0.242775	23.193	31	4	202	4	212	22.7	8.4	9	7	5	9	9	9	11	8	8	7	9	9	1		0.212987	0.0708704	0.195666	0.307591	0.316242	0.455873	0.165068	0.285377	0.465412
	2.6163	0.200051	1.14874	High	Q96AG4	Leucine-rich repeat-containing protein 59 OS=Homo sapiens OX=9606	LRRC59	+	Cluster -67	3.88771	0.0341538	110.769	45	12	1834	12	307	34.9	9.57	84	77	82	79	81	79	85	91	87	79	86	82	1		5.0171	5.04584	4.9947	5.23105	5.17069	5.25605	5.32875	5.27694	5.33589
	1.79323	0.199867	1.14859	High	P62879	Guanine nucleotide-binding protein G(I)/G(S)/G(T) subunit beta-2 OS=Homo sapiens OX=9606	GNB2			1.51908	0.117871	139.186	52	11	1315	6	340	37.3	6	34	38	32	36	35	34	38	40	38	44	44	41	1	Met-loss+Acetyl [N-Term]	3.27049	3.3142	3.21364	3.39576	3.46586	3.53631	3.48253	3.40819	3.65635
	0.78746	0.199354	1.14818	High	O76095	Protein JTB OS=Homo sapiens OX=9606	JTB			0.892335	0.223669	4.206	9	1	12	1	146	16.3	8.28		1	2		1		2	1	1	1	2	1	1		-2.80548	-2.63915	-2.94552	-2.70717	-2.45091	-2.634	-2.48193	-2.33826	-2.67796
	2.24595	0.199162	1.14803	High	P13674	Prolyl 4-hydroxylase subunit alpha-1 OS=Homo sapiens OX=9606	P4HA1			2.23594	0.0627004	195.415	51	21	1642	21	534	61	6.01	57	46	57	53	52	52	59	57	60	51	66	65	1		3.62482	3.73797	3.70358	3.87928	3.86674	3.91785	3.98503	3.89233	4.1093
	0.392	0.198901	1.14782	High	P18583	Protein SON OS=Homo sapiens OX=9606	SON			0.316625	0.541986	108.111	12	16	184	16	2426	263.7	5.64	1	1		1	2					2		1	1	Met-loss+Acetyl [N-Term]	-0.866694	-0.845063	-0.569556	-0.8866	-0.223368	-0.574642	-0.30003	-0.544301	-0.713703
	0.566683	0.198606	1.14759	High	Q9NPL8	Complex I assembly factor TIMMDC1, mitochondrial OS=Homo sapiens OX=9606	TIMMDC1			0.508812	0.387954	4.585	5	1	9	1	285	32.2	8.5	1		1		2		1	1	1	1	1		1		-3.0239	-2.86711	-3.13626	-2.86825	-2.55362	-3.00957	-2.64962	-2.61083	-2.98781
	1.25656	0.198599	1.14758	High	P50443	Sulfate transporter OS=Homo sapiens OX=9606	SLC26A2			2.10892	0.0688732	24.999	10	5	88	5	739	81.6	8.38	1	1					1						1		-2.48463	-2.60547	-2.45838	-2.20146	-2.39127	-2.35995	-2.00198	-2.24046	-2.02153
	1.3408	0.198478	1.14749	High	P61009	Signal peptidase complex subunit 3 OS=Homo sapiens OX=9606	SPCS3			0.844699	0.240262	12.734	13	2	164	2	180	20.3	8.62	8	6	6	4	8	6	5	8	7	7	8	8	1		0.44453	0.545672	0.536796	0.598523	0.810345	0.713564	0.512226	0.807923	0.688745
	0.990011	0.198158	1.14723	High	Q16204	Coiled-coil domain-containing protein 6 OS=Homo sapiens OX=9606	CCDC6			1.10276	0.180139	29.056	16	7	189	7	474	53.3	7.34	13	13	11	14	16	16	12	7	11	12	9	15	1		1.55609	1.33887	1.63382	1.64823	1.7176	1.75743	1.78624	1.63447	1.84696
	1.19853	0.198058	1.14715	High	Q9P2E9	Ribosome-binding protein 1 OS=Homo sapiens OX=9606	RRBP1			2.28262	0.0610404	377.94	34	39	4486	39	1410	152.4	8.6	92	101	87	84	98	101	120	120	123	140	126	126	1		4.45821	4.29788	4.37402	4.47095	4.68654	4.56681	4.80663	4.72008	4.70299
	1.12682	0.197852	1.14699	High	P39019	40S ribosomal protein S19 OS=Homo sapiens OX=9606	RPS19			1.30396	0.143317	58.699	37	7	1494	7	145	16.1	10.32	40	52	50	48	43	40	43	48	51	43	42	48	1		4.16083	3.96184	4.00926	4.13438	4.32707	4.26404	4.36409	4.26305	4.19994
	0.25608	0.197753	1.14691	High	Q8NFA0	Ubiquitin carboxyl-terminal hydrolase 32 OS=Homo sapiens OX=9606	USP32			0.190389	0.67983	5.835	1	1	10	1	1604	181.5	6.44	1				1	2	1	2			1		1		-4.59803	-5.18791	-4.44071	-4.39429	-4.95214	-4.28696	-4.70861	-4.79916	-4.79657
	0.751478	0.197624	1.14681	High	Q9UI12	V-type proton ATPase subunit H OS=Homo sapiens OX=9606	ATP6V1H			1.72507	0.0965938	34.336	19	7	142	7	483	55.8	6.48	4	4	5	6	6	5	2	4	4	6	5	3	1		-0.949462	-1.11488	-0.811856	-0.916633	-0.734591	-0.632105	-0.539581	-0.58579	-0.536581
	0.385093	0.197352	1.14659	High	P00749	Urokinase-type plasminogen activator OS=Homo sapiens OX=9606	PLAU			0.197412	0.671792	4.749	5	1	6	1	431	48.5	8.41													1		-3.93713	-4.43843	-4.01878	-4.13264	-4.02894	-3.64071	-3.92153	-4.43433	-3.98334
	0.26212	0.197232	1.1465	High	P26232	Catenin alpha-2 OS=Homo sapiens OX=9606	CTNNA2			0.100827	0.8024	39.131	9	7	587	1	953	105.2	5.71	16	22	22	18	21	21	23	26	27	32	25	28	1		-0.635985	-0.423757	-1.35421	-0.637019	-0.770538	-0.414698	-0.593306	-0.480231	-1.05484
	0.847831	0.197113	1.1464	High	Q96Q45	Transmembrane protein 237 OS=Homo sapiens OX=9606	TMEM237			0.224038	0.637642	18.018	8	2	84	2	408	45.5	6.47	1	1	1	1	1	2		1	1	2	1	1	1		-1.01458	-1.15268	-0.832492	-0.912196	-0.733631	-0.762592	-0.727596	-0.807662	-1.56096
	2.34245	0.196575	1.14597	High	Q9UM00	Calcium load-activated calcium channel OS=Homo sapiens OX=9606	TMCO1			2.15235	0.068	24.956	15	3	360	3	239	27.1	10.26	18	22	22	20	21	21	16	22	21	17	18	24	1		1.51833	1.55147	1.48139	1.75221	1.66021	1.72849	1.81071	1.68907	1.90319
	0.909839	0.196523	1.14593	High	Q9BXJ8	Ion channel TACAN OS=Homo sapiens OX=9606	TMEM120A			0.737578	0.278053	6.923	5	1	42	1	343	40.6	8.98	1		3	2	1	3	2	4	4	5	3	5	1		-2.58422	-2.67334	-2.34	-2.36304	-2.33527	-2.30968	-2.52739	-2.37809	-2.3743
	0.487829	0.196281	1.14574	High	Q96GA3	Protein LTV1 homolog OS=Homo sapiens OX=9606	LTV1			0.362767	0.498931	20.481	10	3	107	3	475	54.8	4.91	4	5	5	4	4	3	7	4	5	5	6	6	1		-1.22587	-1.30167	-1.63606	-1.05642	-1.43442	-1.08392	-1.31531	-1.25143	-1.09454
	0.385085	0.195654	1.14524	High	Q96G03	Phosphopentomutase OS=Homo sapiens OX=9606	PGM2			0.657604	0.309524	43.794	18	7	186	7	612	68.2	6.73	13	16	12	13	13	12	13	14	14	10	16	9	1		0.842248	0.748368	0.682254	0.783172	0.708118	1.36854	0.598885	0.647716	0.570524
	1.02714	0.1954	1.14504	High	P62314	Small nuclear ribonucleoprotein Sm D1 OS=Homo sapiens OX=9606	SNRPD1			0.936083	0.211044	32.588	37	4	497	4	119	13.3	11.56	17	22	25	18	19	21	23	19	19	22	19	20	1		1.73902	1.62688	1.50719	1.70918	1.91141	1.83871	2.03943	1.72839	1.84754
	1.66165	0.195341	1.14499	High	Q14108	Lysosome membrane protein 2 OS=Homo sapiens OX=9606	SCARB2			2.37625	0.0592128	96.516	32	9	862	9	478	54.3	5.14	36	33	33	36	28	41	48	37	45	38	52	39	1		3.23369	3.29058	3.20693	3.36751	3.52901	3.42071	3.47508	3.57214	3.4945
	0.292752	0.195051	1.14476	High	O14521	Succinate dehydrogenase [ubiquinone] cytochrome b small subunit, mitochondrial OS=Homo sapiens OX=9606	SDHD			1.12001	0.176725	12.88	16	1	31	1	159	17	8.63	2	2	1	2	2	2	1	2		3	2	3	1		-2.69333	-3.46696	-3.48448	-2.9953	-3.14915	-2.91517	-2.67251	-2.21838	-2.66096
	0.37275	0.194986	1.14471	High	O95071	E3 ubiquitin-protein ligase UBR5 OS=Homo sapiens OX=9606	UBR5			0.252581	0.60508	18.835	3	4	26	4	2799	309.2	5.85	3	2	2	1	3		4	1	2	2	4	2	1	Met-loss+Acetyl [N-Term]	-3.21765	-3.22905	-3.26838	-3.47298	-2.75818	-2.89897	-3.02845	-3.17841	-3.02797
	1.18013	0.194956	1.14469	High	O75400	Pre-mRNA-processing factor 40 homolog A OS=Homo sapiens OX=9606	PRPF40A			1.70799	0.0983306	60.84	20	13	173	13	957	108.7	7.56	7	4	6	4	9	8	3	5	5	3	4	6	1		2.04855	1.92344	1.99457	2.10993	2.12042	2.32108	2.20399	2.27589	2.3648
	0.711042	0.194245	1.14413	High	Q6IQ22	Ras-related protein Rab-12 OS=Homo sapiens OX=9606	RAB12			1.21411	0.159709	21.937	22	4	326	3	244	27.2	8.41	22	17	30	26	17	19	16	16	19	19	19	22	1		-2.21441	-2.01859	-2.33719	-2.03335	-1.83624	-2.11787	-1.90927	-1.75785	-1.90697
	0.485019	0.19415	1.14405	High	Q8TB72	Pumilio homolog 2 OS=Homo sapiens OX=9606	PUM2			0.983349	0.203228	30.294	9	7	114	5	1066	114.1	7.08										1			1	Acetyl [N-Term]	-2.45989	-2.39241	-2.63028	-2.15538	-2.12694	-2.61781	-2.51861	-3.56681	-2.96945
	1.28671	0.19414	1.14404	High	Q13492	Phosphatidylinositol-binding clathrin assembly protein OS=Homo sapiens OX=9606	PICALM			1.35515	0.135328	69.722	23	10	346	10	652	70.7	7.9	16	17	15	15	18	17	16	14	16	13	16	15	1		2.90713	2.78467	2.81733	2.91225	3.11207	3.06722	3.12644	3.13235	2.95099
	0.255367	0.194066	1.14398	High	O60573	Eukaryotic translation initiation factor 4E type 2 OS=Homo sapiens OX=9606	EIF4E2			0.100426	0.802941	25.518	18	3	153	3	245	28.3	8.88	5	12	9	10	8	11	10	10	6	9	11	9	1		0.845588	0.368258	1.40207	1.12145	1.09797	0.978699	0.709986	1.26761	0.892607
	1.32533	0.19374	1.14373	High	P62873	Guanine nucleotide-binding protein G(I)/G(S)/G(T) subunit beta-1 OS=Homo sapiens OX=9606	GNB1			1.70142	0.098994	153.423	60	11	1276	6	340	37.4	6	36	37	38	41	40	41	39	40	42	50	50	43	1		2.26084	2.14917	2.10979	2.26462	2.4115	2.42489	2.38822	2.41009	2.56108
	1.25883	0.193515	1.14355	High	Q7Z7H5	Transmembrane emp24 domain-containing protein 4 OS=Homo sapiens OX=9606	TMED4			0.907642	0.218091	42.402	33	5	298	4	227	25.9	8.28	11	17	11	17	15	16	18	14	16	24	16	23	1		0.890355	0.824059	0.871484	1.01034	0.964382	1.19172	0.99398	0.918689	1.17353
	0.945978	0.193417	1.14347	High	Q8WWC4	m-AAA protease-interacting protein 1, mitochondrial OS=Homo sapiens OX=9606	MAIP1			1.59342	0.108958	14.382	12	3	102	3	291	32.5	9.17	8	5	6	6	9	7	7	7	8	9	7	12	1		-1.47733	-1.37522	-1.46657	-1.26655	-1.39107	-1.08125	-1.07979	-1.19083	-1.11957
	0.450006	0.193232	1.14332	High	P08865	40S ribosomal protein SA OS=Homo sapiens OX=9606	RPSA			0.992139	0.201142	338.128	65	19	4342	4	295	32.8	4.87	103	105	111	113	106	114	128	118	118	124	129	120	1	Met-loss+Acetyl [N-Term]	2.55746	2.23152	2.70576	2.76216	2.45645	2.85583	2.97936	2.76416	3.06377
	1.21384	0.192687	1.14289	High	Q9H6E4	Coiled-coil domain-containing protein 134 OS=Homo sapiens OX=9606	CCDC134			1.67747	0.100399	15.225	19	4	33	4	229	26.5	8.85	4		1	1	3	1	3	4	3	2	2	2	1		-1.44331	-1.28705	-1.26785	-1.23828	-1.10478	-1.07709	-1.03767	-1.12766	-0.928288
	0.701032	0.192549	1.14278	High	Q0ZGT2	Nexilin OS=Homo sapiens OX=9606	NEXN			1.01934	0.196867	155.601	33	17	1114	17	675	80.6	5.33	22	24	21	23	21	29	28	26	26	27	26	30	1		2.30913	1.91869	2.1043	2.19618	2.33868	2.3749	2.57562	2.33749	2.36591
	1.32927	0.192449	1.1427	High	P36542	ATP synthase subunit gamma, mitochondrial OS=Homo sapiens OX=9606	ATP5F1C			1.56717	0.11165	32.397	18	5	405	5	298	33	9.22	25	32	36	27	37	24	24	30	32	23	29	27	1		3.03686	3.12884	3.23269	3.35802	3.25082	3.36689	3.40771	3.29907	3.51729
	1.2732	0.191461	1.14192	High	P24752	Acetyl-CoA acetyltransferase, mitochondrial OS=Homo sapiens OX=9606	ACAT1			1.39097	0.128318	92.694	35	11	825	11	427	45.2	8.85	50	56	52	59	57	50	55	58	54	52	58	47	1		3.8463	3.7954	3.98414	4.01373	4.03593	4.15056	4.12433	4.00287	4.1893
	0.334105	0.191082	1.14162	High	Q9BW27	Nuclear pore complex protein Nup85 OS=Homo sapiens OX=9606	NUP85			0.637219	0.319911	47.367	15	7	54	7	656	75	5.55													1		-1.30651	-1.11242	-1.28879	-1.47392	-0.961843	-0.698706	-0.689198	-0.624852	-1.0825
	0.623301	0.190908	1.14148	High	Q13454	Tumor suppressor candidate 3 OS=Homo sapiens OX=9606	TUSC3			0.420097	0.449539	7.009	6	2	52	2	348	39.7	9.91	5	3	2	5	5	4	3	1	6	3	5	8	1		-0.991477	-1.1502	-0.683442	-0.735755	-0.737289	-0.779346	-0.727242	-0.762506	-0.967573
	0.263011	0.190702	1.14132	High	Q7L5Y9	E3 ubiquitin-protein transferase MAEA OS=Homo sapiens OX=9606	MAEA			0.201427	0.665877	6.291	6	2	11	2	396	45.3	8.69	2	1	1		1		1	1	1	2		1	1		-3.68665	-4.17108	-3.19326	-3.39213	-3.4774	-3.60936	-3.36969	-3.99918	-3.96161
	1.2042	0.190594	1.14123	High	Q92544	Transmembrane 9 superfamily member 4 OS=Homo sapiens OX=9606	TM9SF4			1.39624	0.128066	49.223	13	7	264	7	642	74.5	6.54	20	16	21	19	18	18	18	18	22	12	13	15	1		1.31323	1.39848	1.48422	1.53186	1.70051	1.53534	1.63698	1.55043	1.74153
	0.375705	0.190439	1.14111	High	Q12899	Tripartite motif-containing protein 26 OS=Homo sapiens OX=9606	TRIM26			0.82982	0.244823	7.635	5	2	12	2	539	62.1	5.03	1			1				1		1	1		1		-2.71173	-3.32812	-3.24859	-3.01901	-2.96549	-2.73262	-3.37642	-3.25258	-3.30809
	0.80329	0.19019	1.14091	High	P52789	Hexokinase-2 OS=Homo sapiens OX=9606	HK2			1.05945	0.187938	112.201	25	18	973	15	917	102.3	6.05	19	23	18	17	18	24	24	22	29	35	29	26	1	Acetyl [N-Term]	2.18852	1.89495	2.20614	2.22011	2.27463	2.36544	2.37441	2.29301	2.33239
	0.724483	0.189739	1.14056	High	Q13491	Neuronal membrane glycoprotein M6-b OS=Homo sapiens OX=9606	GPM6B			0.530963	0.376221	4.411	5	1	15	1	265	29	5.76	2		2	1	1	1	2	1	3		1	1	1		-3.30968	-3.30876	-3.2607	-3.3397	-3.00522	-2.96501	-3.27985	-3.05477	-3.16233
	1.52374	0.189196	1.14013	High	O00560	Syntenin-1 OS=Homo sapiens OX=9606	SDCBP			0.973262	0.20488	71.798	47	7	500	7	298	32.4	7.53	18	25	17	22	18	23	21	17	14	23	23	19	1	Met-loss+Acetyl [N-Term]	2.05863	2.06876	2.04706	2.28252	2.13587	2.32366	2.23242	2.12537	2.44236
	1.0311	0.188852	1.13986	High	Q14344	Guanine nucleotide-binding protein subunit alpha-13 OS=Homo sapiens OX=9606	GNA13			1.08071	0.183859	38.21	20	5	364	4	377	44	8	21	19	19	21	16	20	25	20	18	27	25	28	1		-0.460834	-0.377694	-0.478183	-0.365993	-0.288124	-0.0960369	-0.221205	-0.327113	-0.141731
	1.07956	0.188681	1.13972	High	P38606	V-type proton ATPase catalytic subunit A OS=Homo sapiens OX=9606	ATP6V1A			0.778736	0.266954	118.725	43	15	538	15	617	68.3	5.52	14	11	13	12	18	15	21	17	21	26	15	23	1		1.99099	1.83904	1.93004	2.07202	2.24278	2.01131	2.11745	2.07583	1.90408
	0.728464	0.188347	1.13946	High	Q9GZM5	Protein YIPF3 OS=Homo sapiens OX=9606	YIPF3			0.477745	0.408825	30.875	17	3	59	3	350	38.2	5.76	3	2	5	4	6	3	4	4	3	2	6	6	1		-0.873794	-0.957036	-1.24535	-0.763858	-0.878048	-0.869234	-1.01485	-1.05545	-0.796721
	0.50949	0.188306	1.13943	High	Q13286	Battenin OS=Homo sapiens OX=9606	CLN3			1.33872	0.13782	4.871	3	1	18	1	438	47.6	6.38				1	2			1	2	2	2		1		-4.34685	-4.06155	-4.57814	-4.1877	-4.2169	-4.01702	-3.83918	-3.98955	-3.6408
	0.748117	0.188285	1.13941	High	Q9Y6R0	Numb-like protein OS=Homo sapiens OX=9606	NUMBL			0.709197	0.290012	10.417	6	3	17	3	609	64.9	8.85	3	1	1	1	3	2			1	2		2	1		-1.34792	-1.55618	-1.38765	-1.41867	-1.08694	-1.22129	-1.33121	-1.46555	-1.4515
	0.853819	0.188115	1.13927	High	Q99543	DnaJ homolog subfamily C member 2 OS=Homo sapiens OX=9606	DNAJC2			1.3042	0.143559	16.513	9	4	31	4	621	72	8.7	3	2	1	2	3	4	1	6	3	1	2	3	1		0.525163	0.597861	0.656646	0.613702	0.942812	0.7875	1.02517	0.854451	0.831526
	1.42687	0.187963	1.13915	High	O43292	Glycosylphosphatidylinositol anchor attachment 1 protein OS=Homo sapiens OX=9606	GPAA1			1.27383	0.147113	11.012	5	3	131	3	621	67.6	8.06	10	10	10	8	8	11	7	4	6	12	7	11	1		0.169976	0.230052	0.0303488	0.357278	0.335009	0.301979	0.235798	0.370355	0.466122
	0.894324	0.187809	1.13903	High	P33908	Mannosyl-oligosaccharide 1,2-alpha-mannosidase IA OS=Homo sapiens OX=9606	MAN1A1			0.907996	0.217962	48.436	24	8	146	8	653	72.9	6.47	9	8	17	10	13	12	15	14	6	13	8	15	1		-0.209002	0.121785	-0.0903463	0.145331	0.0986214	0.141911	0.0387611	0.325749	0.198103
	0.671318	0.187698	1.13895	High	Q9BTX1	Nucleoporin NDC1 OS=Homo sapiens OX=9606	NDC1			0.322628	0.536038	35.9	15	5	28	5	674	76.3	9.09					1	2				2		1	1		-3.28679	-3.3273	-3.15119	-3.08478	-2.85979	-3.25761	-3.72114	-3.35247	-2.93502
	0.533038	0.187502	1.13879	High	Q86Y79	Probable peptidyl-tRNA hydrolase OS=Homo sapiens OX=9606	PTRH1			0.768852	0.269076	10.018	16	2	19	2	214	22.9	10.56	2	1	2	1	3	1	1	2	2	1	2	1	1		-2.44708	-2.36637	-2.85578	-2.38464	-2.41641	-2.30567	-2.22286	-2.13791	-2.39107
	1.31896	0.187323	1.13865	High	Q14690	Protein RRP5 homolog OS=Homo sapiens OX=9606	PDCD11			2.33665	0.0589163	41.668	8	11	74	11	1871	208.6	8.87													1		-1.33266	-1.46866	-1.37211	-1.30766	-1.13505	-1.16876	-1.08254	-1.0616	-1.11774
	0.903332	0.187319	1.13865	High	Q99797	Mitochondrial intermediate peptidase OS=Homo sapiens OX=9606	MIPEP			0.708375	0.290342	57.158	23	11	201	11	713	80.6	7.05	18	15	16	18	15	17	16	17	17	16	21	10	1		1.10393	1.16457	1.28994	1.50813	1.2321	1.38017	1.35762	1.22728	1.16639
	0.357691	0.18684	1.13827	High	Q9HBL7	Plasminogen receptor (KT) OS=Homo sapiens OX=9606	PLGRKT			0.212714	0.651508	35.057	42	5	106	5	147	17.2	9.58	1	3	1	2	2	2	1	2	3	8	1	1	1		-0.786326	-0.854276	-0.413527	-0.834821	-0.30665	-0.352139	-0.499615	-0.661918	-0.723104
	1.2576	0.186533	1.13803	High	Q14789	Golgin subfamily B member 1 OS=Homo sapiens OX=9606	GOLGB1			2.37799	0.0589519	108.517	9	16	308	16	3259	375.8	5	20	18	16	26	29	27	20	27	19	24	23	30	1		2.21329	2.07457	2.27078	2.44596	2.31759	2.35468	2.5346	2.47623	2.53348
	1.16591	0.186125	1.1377	High	Q6ICG6	Uncharacterized protein KIAA0930 OS=Homo sapiens OX=9606	KIAA0930			1.91415	0.0811135	3.632	2	1	15	1	404	45.8	7.94													1		-1.00782	-1.15518	-0.898807	-0.815372	-0.852785	-0.835268	-0.582233	-0.755729	-0.447414
	1.96997	0.1861	1.13768	High	P48047	ATP synthase subunit O, mitochondrial OS=Homo sapiens OX=9606	ATP5PO			2.37811	0.0592688	107.499	50	8	887	8	213	23.3	9.96	49	55	48	51	59	58	57	55	43	51	51	51	1		3.7969	3.90975	3.88059	4.04206	4.01125	4.09222	4.19634	4.08279	4.28514
	0.792668	0.185752	1.13741	High	Q9UKV8	Protein argonaute-2 OS=Homo sapiens OX=9606	AGO2			0.725498	0.283902	31.085	16	9	110	7	859	97.1	9.19	3	2	7		2	1		3		3	1		1		-2.04744	-2.20536	-1.94344	-1.79039	-1.81586	-2.03273	-1.7437	-2.02128	-1.67598
	2.31856	0.185392	1.13713	High	O75367	Core histone macro-H2A.1 OS=Homo sapiens OX=9606	MACROH2A1			2.13653	0.0673553	28.962	27	6	96	6	369	39.2	9.83						1							1		-1.46624	-1.4398	-1.52829	-1.25855	-1.29308	-1.32652	-1.46407	-1.56298	-1.42146
	1.28198	0.185387	1.13712	High	Q16740	ATP-dependent Clp protease proteolytic subunit, mitochondrial OS=Homo sapiens OX=9606	CLPP			1.45616	0.125464	16.018	15	3	52	3	277	30.2	8.09	3	1	3	4	4	2	4	3	3	2	2	4	1		0.190944	0.311378	0.416036	0.455474	0.521162	0.497881	0.556988	0.43459	0.59169
	0.490514	0.185274	1.13703	High	O75477	Erlin-1 OS=Homo sapiens OX=9606	ERLIN1			0.43357	0.438669	60.897	32	7	650	6	348	39.1	7.87	21	24	27	24	32	31	21	32	29	27	31	32	1		0.14652	-0.0476065	0.084466	0.065608	0.12023	0.553364	0.251076	0.146804	0.406414
	0.27422	0.185222	1.13699	High	Q92620	Pre-mRNA-splicing factor ATP-dependent RNA helicase PRP16 OS=Homo sapiens OX=9606	DHX38			0.132425	0.75743	16.825	5	5	78	5	1227	140.4	6.54	4	6	4	7	6	8	6	6	5	4	6	8	1		-1.06658	-1.77726	-0.962716	-0.905707	-1.16854	-1.17665	-1.31743	-1.28132	-1.01387
	1.9291	0.185207	1.13698	High	P05165	Propionyl-CoA carboxylase alpha chain, mitochondrial OS=Homo sapiens OX=9606	PCCA			0.935082	0.211133	6.105	3	2	28	2	728	80	7.52	3	2	1	4	4	3	1	1	1	3	3	2	1		-3.70588	-3.646	-3.7588	-3.46618	-3.53391	-3.55496	-3.69013	-3.3729	-3.30927
	1.90398	0.184825	1.13668	High	P40939	Trifunctional enzyme subunit alpha, mitochondrial OS=Homo sapiens OX=9606	HADHA			2.46458	0.0629474	244.589	47	25	2346	25	763	82.9	9.04	92	116	114	122	126	126	125	134	140	137	137	150	1		4.37989	4.47449	4.46551	4.56909	4.63155	4.67373	4.65882	4.60413	4.67264
	0.835296	0.184347	1.1363	High	Q58FF6	Putative heat shock protein HSP 90-beta 4 OS=Homo sapiens OX=9606	HSP90AB4P			1.80877	0.0890047	56.386	12	8	1256	2	505	58.2	4.73	61	65	71	68	61	67	59	55	58	63	74	55	1		1.54496	1.56996	1.39538	1.52264	1.72481	1.8159	1.85464	1.91561	1.83493
	0.30309	0.183978	1.13601	High	Q9H0W7	THAP domain-containing protein 2 OS=Homo sapiens OX=9606	THAP2			0.571003	0.354251	3.814	4	1	49	1	228	26.2	10.15		5					5	5	6	6	3	4	1		-0.786021	-1.47815	-0.987559	-1.17197	-0.737436	-0.790398	-0.584339	-0.946488	-0.435541
	0.317448	0.183789	1.13586	High	Q8WVC0	RNA polymerase-associated protein LEO1 OS=Homo sapiens OX=9606	LEO1			0.690221	0.2966	21.751	8	3	54	3	666	75.4	4.51	5	2	4	3	4	2	2	4	1	1	2	2	1		-0.803813	-1.08648	-1.31334	-1.24237	-0.620388	-0.789511	-1.20876	-1.19933	-1.58809
	0.767785	0.18376	1.13584	High	Q8NI27	THO complex subunit 2 OS=Homo sapiens OX=9606	THOC2			1.72449	0.0965597	116.035	16	18	129	18	1593	182.7	8.44	3	1	1	1	2	1	1		1	2		2	1		-1.73512	-1.52852	-1.85489	-1.60284	-1.41653	-1.54788	-1.27674	-1.35888	-1.35383
	0.375791	0.183135	1.13535	High	Q6UW63	Protein O-glucosyltransferase 2 OS=Homo sapiens OX=9606	POGLUT2			0.798818	0.258724	14.779	11	3	15	3	502	58	7.71		1		3	1	1	2	1	1	2	1	2	1		-2.78825	-2.51533	-2.09567	-2.25927	-2.35187	-2.2387	-2.08153	-2.15917	-2.00407
	1.44874	0.183133	1.13535	High	O60749	Sorting nexin-2 OS=Homo sapiens OX=9606	SNX2			1.63389	0.106647	43.187	18	9	223	8	519	58.4	5.12	20	19	18	22	19	13	17	20	19	14	19	14	1		1.82408	1.8728	2.0007	2.03307	2.12129	2.09263	2.4626	2.14664	2.18538
	0.37216	0.182487	1.13484	High	Q15424	Scaffold attachment factor B1 OS=Homo sapiens OX=9606	SAFB			1.32482	0.139723	102.98	18	14	210	6	915	102.6	5.47	6	2	3	3	7	3	7	5	5	2	4	4	1		-2.35005	-2.3337	-2.39468	-2.54877	-1.84316	-2.13904	-1.80544	-1.75557	-1.88332
	0.730516	0.182485	1.13484	High	Q8NEM2	SHC SH2 domain-binding protein 1 OS=Homo sapiens OX=9606	SHCBP1			1.1197	0.176713	7.519	5	2	38	2	672	75.6	4.75	3	4	3	1	3	3	3	4	6	3	3	2	1		-2.03465	-2.20695	-2.09421	-1.86663	-2.13017	-1.79156	-1.84629	-1.89699	-1.71756
	0.870138	0.182438	1.1348	High	P49821	NADH dehydrogenase [ubiquinone] flavoprotein 1, mitochondrial OS=Homo sapiens OX=9606	NDUFV1			1.50171	0.119621	83.807	42	13	674	13	464	50.8	8.21	17	23	26	25	22	23	22	29	28	23	32	34	1		2.67541	2.45392	2.58101	2.73044	2.63776	2.88946	2.90921	2.80047	2.99972
	1.07692	0.182375	1.13475	High	P56556	NADH dehydrogenase [ubiquinone] 1 alpha subcomplex subunit 6 OS=Homo sapiens OX=9606	NDUFA6			1.28217	0.146185	8.34	19	2	60	2	128	15.1	9.98	2	1		1	2	2	5	2	4	2	3	2	1		-0.700786	-0.808496	-0.639989	-0.420074	-0.635609	-0.546463	-0.369596	-0.587565	-0.359497
	1.57424	0.182204	1.13462	High	O00186	Syntaxin-binding protein 3 OS=Homo sapiens OX=9606	STXBP3			2.25964	0.0622957	20.647	13	6	115	6	592	67.7	7.8	6	7	7	10	10	9	12	10	6	9	8	7	1		0.031539	0.106555	0.0218859	0.19222	0.186941	0.327431	0.270866	0.328761	0.407209
	0.748963	0.181819	1.13431	High	P20674	Cytochrome c oxidase subunit 5A, mitochondrial OS=Homo sapiens OX=9606	COX5A			0.803639	0.255864	17.693	27	3	323	3	150	16.8	6.79	14	20	7	10	11	14	16	16	14	16	16	14	1		3.03522	3.23731	3.05981	3.15551	3.46619	3.2561	3.54876	3.1831	3.45722
	0.530972	0.181812	1.13431	High	P61769	Beta-2-microglobulin OS=Homo sapiens OX=9606	B2M			0.170929	0.706187	85.242	52	6	348	6	119	13.7	6.52	15	18	15	12	15	18	19	18	19	17	16	17	1		3.9674	4.05459	3.62635	3.91821	4.10686	4.1687	4.29079	4.37174	3.57927
	1.01667	0.181498	1.13406	High	O00461	Golgi integral membrane protein 4 OS=Homo sapiens OX=9606	GOLIM4			0.969228	0.205782	57.007	14	5	104	5	696	81.8	4.77	6	6	5	8	6	7	6	8	3	4	8	5	1		0.0808878	-0.118335	0.05688	0.212567	0.0819683	0.269392	0.0865936	0.190034	0.131975
	0.481082	0.181196	1.13382	High	Q96MW5	Conserved oligomeric Golgi complex subunit 8 OS=Homo sapiens OX=9606	COG8			0.760376	0.270738	26.891	15	5	39	5	612	68.4	5.2	4		2	1	3	3	4	2	3	1	3	4	1		0.091527	-0.0958452	-0.139121	-0.103377	0.404325	0.0991993	0.686117	0.465287	0.0379944
	1.87703	0.181012	1.13368	High	Q70UQ0	Inhibitor of nuclear factor kappa-B kinase-interacting protein OS=Homo sapiens OX=9606	IKBIP			2.38113	0.0594098	44.254	25	8	457	8	350	39.3	9.17	22	28	24	27	23	28	33	25	30	30	31	30	1		2.47381	2.58884	2.59096	2.73368	2.7627	2.70027	2.75089	2.85513	2.75907
	0.422542	0.180576	1.13334	High	Q5T1C6	Acyl-coenzyme A thioesterase THEM4 OS=Homo sapiens OX=9606	THEM4			0.203568	0.662568	3.931	4	1	4	1	240	27.1	8.28	1		1		1	1							1		-3.85662	-4.43796	-3.96341	-3.84012	-3.96526	-3.91088	-3.85702	-4.22897	-3.6543
	1.0059	0.180031	1.13291	High	Q9NW15	Anoctamin-10 OS=Homo sapiens OX=9606	ANO10			1.51957	0.11795	7.223	5	2	47	2	660	76.3	7.4	1	7	1	1	5	6	3	6	5	6	1	2	1		-0.725554	-0.813394	-0.766337	-0.548877	-0.74251	-0.473804	-0.429829	-0.580131	-0.384468
	0.650615	0.179862	1.13278	High	Q07812	Apoptosis regulator BAX OS=Homo sapiens OX=9606	BAX			1.0694	0.18732	43.032	30	5	124	5	192	21.2	5.22	7	5	6	5	7	7	8	11	7	8	8	8	1		0.560021	0.691688	0.572635	0.6116	1.01129	0.741037	1.04252	0.936305	0.806709
	0.452535	0.179645	1.13261	High	Q16540	39S ribosomal protein L23, mitochondrial OS=Homo sapiens OX=9606	MRPL23			1.06968	0.187359	16.664	24	2	55	2	153	17.8	9.69	2	3	3	4	6	5	5	6	3	3	2	5	1		-0.76583	-0.467383	-1.02981	-0.48379	-0.57168	-0.668615	-0.34708	-0.296506	-0.432705
	0.477473	0.179612	1.13258	High	O43809	Cleavage and polyadenylation specificity factor subunit 5 OS=Homo sapiens OX=9606	NUDT21			0.264143	0.594773	37.16	35	7	208	7	227	26.2	8.82	9	15	15	15	13	13	12	15	11	15	10	10	1		1.04806	0.811738	1.21205	0.974177	1.31448	1.32203	1.11501	0.977529	1.32437
	1.76364	0.179394	1.13241	High	Q6RW13	Type-1 angiotensin II receptor-associated protein OS=Homo sapiens OX=9606	AGTRAP			1.94943	0.077	8.077	25	2	19	2	159	17.4	6.14	1		2		1		5	2	3	2	1	2	1		-2.59758	-2.56486	-2.46868	-2.37543	-2.39996	-2.31754	-2.20375	-2.33567	-2.05646
	1.59007	0.179294	1.13233	High	Q9Y6D9	Mitotic spindle assembly checkpoint protein MAD1 OS=Homo sapiens OX=9606	MAD1L1			1.45206	0.125296	25.988	12	6	57	6	718	83	5.92	2	6	6	2	4	1	7	5	3	6	2	4	1		0.583224	0.639123	0.564149	0.733167	0.867817	0.723394	0.740227	0.789037	0.654562
	0.541216	0.17929	1.13233	High	Q6UWP7	Lysocardiolipin acyltransferase 1 OS=Homo sapiens OX=9606	LCLAT1			0.342524	0.515782	14.033	7	2	26	2	414	48.9	8.62	1	2	2	2	2	4	2	2	2	4	2	1	1		-1.98316	-2.26315	-1.90417	-1.85634	-2.04685	-1.70942	-1.85493	-2.08575	-1.76152
	0.818054	0.179218	1.13227	High	P17152	Transmembrane protein 11, mitochondrial OS=Homo sapiens OX=9606	TMEM11			0.718699	0.287087	5.473	13	2	46	2	192	21.5	7.36	3		2	2	2	2	2	3	3	4	3	3	1		-1.20089	-0.961301	-0.998054	-0.987533	-0.749773	-0.885284	-0.764072	-1.00467	-0.816427
	0.474016	0.179084	1.13216	High	O43504	Ragulator complex protein LAMTOR5 OS=Homo sapiens OX=9606	LAMTOR5			0.674838	0.302736	35.789	48	2	208	2	91	9.6	4.87	9	8	9	6	5	8	2	4	7	5	6	5	1		-0.936887	-1.42157	-1.35329	-1.17732	-1.03066	-0.966526	-1.05595	-0.945554	-0.866943
	0.0918625	0.178825	1.13196	High	Q969E2	Secretory carrier-associated membrane protein 4 OS=Homo sapiens OX=9606	SCAMP4			0.183039	0.689398	5.815	17	2	26	2	229	25.7	8.82	3	1		2	2	1	3	2	3		4		1		-2.024	-1.353	-2.63616	-1.92715	-0.762375	-2.78715	-2.27305	-1.09812	-5.12384
	0.425358	0.178752	1.1319	High	Q92541	RNA polymerase-associated protein RTF1 homolog OS=Homo sapiens OX=9606	RTF1			0.288571	0.568799	14.084	5	3	29	3	710	80.3	8.15	4	2	3	3	2	1	2	2	2	2	1	2	1		0.0041399	-0.133101	0.309648	0.0502424	0.469378	0.197323	0.150215	0.154067	0.11408
	0.150898	0.178581	1.13177	High	Q9NZR2	Low-density lipoprotein receptor-related protein 1B OS=Homo sapiens OX=9606	LRP1B			0.156684	0.725649	11.387	1	3	11	3	4599	515.2	5.3			1	1		2	1	1					1		-3.80995	-4.29991	-3.88652	-3.39624	-4.64881	-3.4156	-4.10892	-3.36545	-3.44938
	1.7334	0.17816	1.13144	High	Q10713	Mitochondrial-processing peptidase subunit alpha OS=Homo sapiens OX=9606	PMPCA			1.75498	0.0933362	83.421	25	9	318	9	525	58.2	6.92	23	28	26	27	23	23	19	20	19	24	19	27	1		1.79405	1.72804	1.72631	1.97805	1.95776	1.84707	1.82734	1.83653	1.90966
	0.430388	0.177954	1.13128	High	P06748	Nucleophosmin OS=Homo sapiens OX=9606	NPM1			0.629481	0.323249	318.311	53	13	4510	13	294	32.6	4.78	69	64	72	64	70	75	93	92	108	91	119	91	1	Acetyl [N-Term]	5.19943	4.8674	4.90033	4.92453	5.41575	5.16074	5.5591	5.49809	5.04448
	0.259714	0.177455	1.13089	High	Q9Y4B6	DDB1- and CUL4-associated factor 1 OS=Homo sapiens OX=9606	DCAF1			0.696075	0.294649	9.734	3	3	25	3	1507	168.9	5.06		2	1	4	1	4	1	1	1	3	1	1	1		-2.6939	-2.86414	-2.15545	-2.32976	-2.13893	-2.71243	-2.03608	-2.07004	-2.21893
	1.9477	0.177423	1.13086	High	Q5JRX3	Presequence protease, mitochondrial OS=Homo sapiens OX=9606	PITRM1			2.14292	0.0669668	169.07	38	23	641	23	1037	117.3	6.92	41	46	47	51	41	50	48	47	36	53	38	43	1		3.57097	3.66551	3.6629	3.76283	3.84745	3.82137	4.04362	3.86572	3.86357
	1.10982	0.176849	1.13041	High	P98160	Basement membrane-specific heparan sulfate proteoglycan core protein OS=Homo sapiens OX=9606	HSPG2			1.3426	0.137769	69.937	5	15	229	15	4391	468.5	6.51	8	7	3	4	6	7	6	8	3	6	5	8	1		0.00628185	0.0900202	0.136886	0.15216	0.373613	0.237961	0.266243	0.669839	0.419867
	1.02053	0.176811	1.13038	High	Q9UL25	Ras-related protein Rab-21 OS=Homo sapiens OX=9606	RAB21			1.19895	0.161341	28.704	24	5	207	5	225	24.3	7.94	18	11	16	16	18	18	15	16	14	17	13	17	1		1.83577	1.65559	1.86622	1.99845	1.86781	2.02175	2.06775	1.91399	2.16156
	1.03669	0.176706	1.1303	High	P11166	Solute carrier family 2, facilitated glucose transporter member 1 OS=Homo sapiens OX=9606	SLC2A1			1.89953	0.0829496	56.53	20	7	989	7	492	54	8.72	23	22	20	23	24	27	27	31	32	30	32	27	1		1.79732	1.71929	1.84644	2.00962	1.82524	2.05831	2.29788	2.03995	2.24281
	1.34217	0.176688	1.13029	High	P51398	28S ribosomal protein S29, mitochondrial OS=Homo sapiens OX=9606	DAP3			1.38932	0.128418	63.379	35	9	342	9	398	45.5	8.88	22	27	22	22	25	26	22	19	19	29	20	20	1		1.71325	1.73672	1.55786	1.8197	1.82159	1.8966	1.90181	1.76695	1.90433
	1.50505	0.176688	1.13029	High	O94766	Galactosylgalactosylxylosylprotein 3-beta-glucuronosyltransferase 3 OS=Homo sapiens OX=9606	B3GAT3			1.55722	0.113639	41.231	27	5	118	5	335	37.1	8.27	12	6	8	8	8	8	8	8	7	12	8	12	1		0.441186	0.538939	0.506007	0.613095	0.762896	0.640205	0.832375	0.633714	0.710367
	0.332963	0.176505	1.13014	High	Q8TAA9	Vang-like protein 1 OS=Homo sapiens OX=9606	VANGL1			0.6273	0.32384	5.557	5	2	8	2	524	59.9	8.81		1					1			1	1	1	1		-2.4401	-2.84265	-2.11468	-2.40502	-2.24691	-2.21599	-2.07076	-2.31163	-1.42837
	0.778567	0.175511	1.12936	High	Q96EK7	Constitutive coactivator of peroxisome proliferator-activated receptor gamma OS=Homo sapiens OX=9606	FAM120B			0.941811	0.209852	11.906	7	4	20	4	910	103.7	5.69	2		3	3	3	2	2	2	1		1	1	1		-1.30033	-1.44407	-1.28354	-1.31871	-1.00543	-1.17726	-3.38422	-1.21447	-4.90624
	0.491548	0.175391	1.12927	High	Q9P0J1	[Pyruvate dehydrogenase [acetyl-transferring]]-phosphatase 1, mitochondrial OS=Homo sapiens OX=9606	PDP1			0.730254	0.281692	15.854	12	4	16	4	537	61	6.67	1	1	1	3	1	2	3	3				1	1		-2.61107	-2.23411	-2.68694	-2.33868	-2.45075	-2.21652	-2.7869	-2.7161	-2.46056
	0.149878	0.174857	1.12885	High	Q8NBZ7	UDP-glucuronic acid decarboxylase 1 OS=Homo sapiens OX=9606	UXS1			0.0433117	0.905365	9.106	12	2	14	2	420	47.5	8.94	1	1	2	1	1	1	3	1	1		1	1	1		-2.34181	-3.36154	-2.14676	-2.16227	-2.29357	-2.8697	-2.62762	-2.9625	-2.13508
	0.992193	0.174557	1.12862	High	P50897	Palmitoyl-protein thioesterase 1 OS=Homo sapiens OX=9606	PPT1			1.23013	0.156054	94.863	36	8	320	8	306	34.2	6.52	18	19	19	24	24	28	24	29	28	23	23	19	1		1.9541	1.91793	1.81908	1.99746	2.00183	2.21548	2.05557	2.0873	2.13443
	0.857305	0.174539	1.1286	High	Q9UGP8	Translocation protein SEC63 homolog OS=Homo sapiens OX=9606	SEC63			0.673189	0.303524	69.479	23	12	432	12	760	87.9	5.31	18	18	16	23	13	19	12	22	17	23	19	21	1		1.69945	1.44395	1.71257	1.86314	1.77447	1.74199	1.67493	1.71409	1.8633
	0.273576	0.174505	1.12858	High	P54826	Growth arrest-specific protein 1 OS=Homo sapiens OX=9606	GAS1			0.295593	0.562066	30.797	19	3	66	3	345	35.7	5.55	1	1				1			2	2	2	1	1		-2.58184	-3.14827	-2.52324	-2.82318	-2.27556	-2.63109	-2.45907	-2.5245	-2.51078
	0.523847	0.17418	1.12832	High	Q13884	Beta-1-syntrophin OS=Homo sapiens OX=9606	SNTB1			0.631381	0.322628	40.757	18	7	137	7	538	58	8.63	3	2	3	4	5	4	4	3	2	4	6	4	1		-0.995812	-1.45235	-1.35499	-1.10257	-1.01006	-1.16797	-0.882162	-1.02767	-1.13601
	0.89314	0.173594	1.12786	High	Q13439	Golgin subfamily A member 4 OS=Homo sapiens OX=9606	GOLGA4			0.653459	0.311411	42.246	6	8	55	8	2230	261	5.39	1	3	7	3	4	6	7	5	5	3	3	6	1		-0.40536	-0.386472	-0.210046	-0.286708	-0.0646973	-0.12969	-0.0855751	-0.286069	0.277014
	1.43184	0.173421	1.12773	High	Q8TCT9	Minor histocompatibility antigen H13 OS=Homo sapiens OX=9606	HM13			2.8	0.0536	81.787	28	7	686	7	377	41.5	6.43	25	28	24	29	30	36	35	30	33	33	35	42	1		3.31687	3.23604	3.39471	3.55402	3.46616	3.4477	3.61731	3.67268	3.62834
	1.93821	0.173405	1.12772	High	P08195	4F2 cell-surface antigen heavy chain OS=Homo sapiens OX=9606	SLC3A2			1.81794	0.0875765	85.568	27	14	856	14	630	68	5.01	38	36	37	40	38	40	40	42	44	37	41	42	1		2.03999	1.96493	2.02983	2.19502	2.12623	2.23371	2.17021	2.21922	2.36833
	0.687826	0.17336	1.12768	High	Q9NYY8	FAST kinase domain-containing protein 2, mitochondrial OS=Homo sapiens OX=9606	FASTKD2			0.744057	0.276488	5.448	5	2	5	2	710	81.4	8.05		1			1	1	1		1				1		-1.81139	-1.76184	-2.02168	-1.66388	-1.56456	-1.84639	-2.61782	-1.85787	-1.97096
	0.700513	0.173221	1.12757	High	P54709	Sodium/potassium-transporting ATPase subunit beta-3 OS=Homo sapiens OX=9606	ATP1B3			0.613223	0.329696	58.17	42	8	381	8	279	31.5	8.35	17	16	12	14	13	16	11	16	12	17	11	19	1		1.28278	1.09923	1.45947	1.43498	1.38938	1.53679	1.57009	1.30588	1.76698
	0.904524	0.172957	1.12737	High	Q92621	Nuclear pore complex protein Nup205 OS=Homo sapiens OX=9606	NUP205			0.664543	0.30723	223.162	27	38	725	38	2012	227.8	6.19	8	8	11	17	13	5	15	9	6	10	7	9	1		3.12721	3.02769	3.28803	3.34676	3.22935	3.38569	3.19122	3.32897	3.54529
	1.20544	0.172873	1.1273	High	O76031	ATP-dependent Clp protease ATP-binding subunit clpX-like, mitochondrial OS=Homo sapiens OX=9606	CLPX			1.26811	0.148135	35.73	13	7	152	7	633	69.2	7.58	10	7	11	10	12	10	13	15	15	7	12	10	1		0.510396	0.483417	0.590289	0.588384	0.72488	0.789457	0.630291	0.713216	0.768948
	1.32942	0.172828	1.12727	High	Q71RC2	La-related protein 4 OS=Homo sapiens OX=9606	LARP4			1.20455	0.160967	42.129	13	8	176	8	724	80.5	6.61	1							1					1		-0.908235	-1.00252	-0.852777	-0.832738	-0.700464	-0.711843	-0.607616	-0.652318	-0.84185
	0.680149	0.172665	1.12714	High	Q8IWB7	WD repeat and FYVE domain-containing protein 1 OS=Homo sapiens OX=9606	WDFY1			0.589784	0.343485	9.284	6	2	38	2	410	46.3	7.33	3	5	2	5	2	3	2	4	2	1	4	2	1		0.156236	0.214465	0.499366	0.377202	0.478239	0.532621	0.511982	0.333676	0.655151
	0.681547	0.172435	1.12696	High	O43290	U4/U6.U5 tri-snRNP-associated protein 1 OS=Homo sapiens OX=9606	SART1			1.34206	0.137514	117.089	32	20	386	20	800	90.2	6.13	5	6	5	6	5	3	6	7	9	7	5	4	1		0.583478	0.503995	0.366176	0.466271	0.770174	0.734509	1.05841	0.858848	0.732857
	0.715765	0.172267	1.12683	High	Q7Z7H8	39S ribosomal protein L10, mitochondrial OS=Homo sapiens OX=9606	MRPL10			0.956435	0.207994	34.444	24	4	146	4	261	29.3	9.58	9	7	11	9	9	10	11	14	13	11	15	16	1		0.0072794	0.204944	-0.132699	0.105672	0.277344	0.21331	0.197987	0.258874	0.311287
	0.390583	0.171642	1.12634	High	O75044	SLIT-ROBO Rho GTPase-activating protein 2 OS=Homo sapiens OX=9606	SRGAP2			0.33974	0.51807	16.188	6	4	51	3	1071	120.8	6.7	6	3	5	6	4	5	4	4	5	2	3	4	1		-3.20218	-2.92788	-2.97546	-3.168	-2.82109	-2.60151	-2.90113	-2.94017	-2.57965
	1.86016	0.171392	1.12614	High	A0A0U1RRL7	Protein MMP24OS OS=Homo sapiens OX=9606	MMP24OS			1.38195	0.12971	15.2	37	1	35	1	71	7.7	4.72	1	1	1	1	1	1	1	1	2	1	2	2	1		0.0411692	0.0697241	-0.00321674	0.196141	0.272638	0.153074	0.0982018	0.279033	0.302198
	1.67141	0.17118	1.12598	High	O95302	Peptidyl-prolyl cis-trans isomerase FKBP9 OS=Homo sapiens OX=9606	FKBP9			0.958929	0.207862	100.71	31	12	1560	12	570	63	5.08	71	79	82	77	73	82	75	76	85	91	88	79	1		3.70451	3.60655	3.67602	3.86627	3.76088	3.87346	3.87244	3.70409	4.03644
	0.288821	0.171108	1.12592	High	Q9Y2X3	Nucleolar protein 58 OS=Homo sapiens OX=9606	NOP58			0.0596697	0.874388	32.478	13	6	39	6	529	59.5	8.92		1	1			1	1		2	1	1		1		-2.19393	-2.19187	-2.54576	-2.48606	-1.76534	-2.16683	-1.80356	-2.07922	-2.89248
	1.54444	0.171087	1.12591	High	Q8NHP8	Putative phospholipase B-like 2 OS=Homo sapiens OX=9606	PLBD2			1.78983	0.0911872	38.136	13	5	209	5	589	65.4	6.8	11	13	10	10	11	11	16	15	11	12	10	16	1		0.803386	0.774175	0.868007	0.905377	1.00209	1.05136	0.979954	0.987273	1.10218
	1.39426	0.170762	1.12565	High	P07602	Prosaposin OS=Homo sapiens OX=9606	PSAP			1.87223	0.0851327	71.663	29	12	584	12	524	58.1	5.17	30	28	32	28	27	39	29	34	41	37	43	37	1		3.60576	3.7261	3.6761	3.75038	3.89472	3.87515	4.00398	3.85529	4.07533
	0.70046	0.169552	1.12471	High	P25490	Transcriptional repressor protein YY1 OS=Homo sapiens OX=9606	YY1			0.338914	0.518913	13.204	10	3	25	3	414	44.7	6.25	1	2	1	1	1	3	1	4	1	2	1	2	1		-2.21632	-2.42799	-2.06381	-2.08716	-2.10888	-2.00343	-2.03706	-2.49352	-2.15511
	0.101036	0.169356	1.12456	High	Q8TDN6	Ribosome biogenesis protein BRX1 homolog OS=Homo sapiens OX=9606	BRIX1			0.0901383	0.819701	37.011	33	6	79	6	353	41.4	9.92	1		1				1		1				1		-4.18978	-3.0185	-4.07663	-4.53729	-3.13553	-3.10402	-3.12333	-2.6907	-4.25382
	1.30295	0.169187	1.12442	High	P26572	Alpha-1,3-mannosyl-glycoprotein 2-beta-N-acetylglucosaminyltransferase OS=Homo sapiens OX=9606	MGAT1			1.07556	0.185366	21.614	12	5	156	5	445	50.8	9.16	10	10	8	11	8	12	10	11	12	13	11	9	1		0.297891	0.365735	0.351245	0.61099	0.413383	0.498058	0.631979	0.396543	0.658138
	2.69313	0.169019	1.12429	High	Q9BZF1	Oxysterol-binding protein-related protein 8 OS=Homo sapiens OX=9606	OSBPL8	+	Cluster -67	3.16838	0.0402264	47.589	16	10	159	9	889	101.1	6.96	12	9	13	5	14	3	8	11	11	9	8	7	1		0.456876	0.431344	0.420814	0.566419	0.638842	0.61083	0.563511	0.619599	0.615997
	0.239729	0.168743	1.12408	High	O00567	Nucleolar protein 56 OS=Homo sapiens OX=9606	NOP56			0.14265	0.742925	33.178	18	8	161	8	594	66	9.19			1				1			1			1		-1.74858	-1.78646	-1.61637	-1.93755	-1.02328	-1.68434	-1.13791	-1.18586	-2.02184
	0.753598	0.168448	1.12385	High	Q14118	Dystroglycan 1 OS=Homo sapiens OX=9606	DAG1			0.663085	0.308015	54.545	14	7	240	7	895	97.4	8.56	10	12	8	5	12	12	12	5	8	9	7	13	1		0.330649	0.130042	0.254754	0.419129	0.254951	0.546709	0.395779	0.31095	0.540323
	1.09583	0.168372	1.12379	High	Q9BYD3	39S ribosomal protein L4, mitochondrial OS=Homo sapiens OX=9606	MRPL4			1.45571	0.124912	51.895	38	6	182	6	311	34.9	9.72	5	11	7	8	7	11	9	20	12	15	12	14	1		0.772941	0.890662	0.718049	0.935987	0.889587	1.06119	1.04354	0.964862	0.985371
	1.27015	0.168316	1.12375	High	Q9UJS0	Electrogenic aspartate/glutamate antiporter SLC25A13, mitochondrial OS=Homo sapiens OX=9606	SLC25A13			1.65683	0.102814	92.172	38	18	886	14	675	74.1	8.62	42	40	35	38	40	42	49	47	41	37	39	42	1		2.19608	2.09536	2.14048	2.2729	2.24319	2.42079	2.38815	2.3085	2.47558
	0.839756	0.167536	1.12314	High	P07585	Decorin OS=Homo sapiens OX=9606	DCN			0.788809	0.262582	40.97	24	6	298	6	359	39.7	8.54	13	7	7	10	15	12	9	19	9	15	11	13	1		1.52513	1.50342	1.65563	1.58077	1.75327	1.85275	1.75296	1.62948	1.79513
	0.898691	0.167349	1.12299	High	Q9UKA9	Polypyrimidine tract-binding protein 2 OS=Homo sapiens OX=9606	PTBP2			1.15375	0.170056	66.017	35	10	496	9	531	57.5	8.66	27	17	18	23	20	19	23	23	20	24	29	13	1		1.37024	1.30831	1.10492	1.37157	1.48751	1.42643	1.45805	1.47288	1.43059
	0.532974	0.167272	1.12293	High	Q7Z2W9	39S ribosomal protein L21, mitochondrial OS=Homo sapiens OX=9606	MRPL21			0.713011	0.289077	14.589	24	3	119	3	205	22.8	9.89	7	11	9	12	9	5	7	12	7	7	10	8	1		0.480916	0.433333	0.57853	0.740972	0.408712	0.844912	0.852757	0.624328	0.795881
	1.50537	0.167245	1.12291	High	Q9UNK0	Syntaxin-8 OS=Homo sapiens OX=9606	STX8			1.00147	0.19939	11.476	15	3	112	3	236	26.9	4.98	9	9	8	10	8	10	8	8	10	7	8	6	1		0.0987425	0.190301	0.122052	0.237336	0.289829	0.385666	0.502783	0.453687	0.174551
	0.185873	0.167192	1.12287	High	Q8WZA1	Protein O-linked-mannose beta-1,2-N-acetylglucosaminyltransferase 1 OS=Homo sapiens OX=9606	POMGNT1			0.0921212	0.816626	6.378	3	1	8	1	660	75.2	6.83	1	1	1	1	1	1	1				1		1		-4.33045	-4.17906	-4.46451	-4.00017	-3.67506	-4.79721	-3.61886	-3.69475	-4.8228
	1.78276	0.16643	1.12228	High	Q8IYS2	Uncharacterized protein KIAA2013 OS=Homo sapiens OX=9606	KIAA2013			1.77766	0.0911696	36.825	19	7	139	7	634	69.1	8.19	9	8	7	7	9	9	10	7	13	13	8	9	1		0.144616	0.218173	0.153377	0.406835	0.292269	0.316351	0.516411	0.31001	0.529202
	0.187382	0.165788	1.12178	High	Q9BUM1	Glucose-6-phosphatase 3 OS=Homo sapiens OX=9606	G6PC3			0.175318	0.700406	7.834	6	1	55	1	346	38.7	8.21	3	3	5	3	2	5	4	3	4	2	3	5	1		-1.45774	-1.6119	-2.49473	-1.50118	-1.84103	-1.7248	-1.39809	-1.63724	-1.73459
	0.631428	0.165675	1.12169	High	O95167	NADH dehydrogenase [ubiquinone] 1 alpha subcomplex subunit 3 OS=Homo sapiens OX=9606	NDUFA3			0.76608	0.269548	22.355	42	3	114	3	84	9.3	8.46	6	6	2	4	4	5	3	6	6	7	10	8	1		0.342179	0.204169	0.406108	0.299827	0.497013	0.652641	0.842224	0.394206	0.658859
	0.941007	0.165269	1.12138	High	Q13283	Ras GTPase-activating protein-binding protein 1 OS=Homo sapiens OX=9606	G3BP1			0.999242	0.19922	232.007	52	17	2140	17	466	52.1	5.52	59	72	62	54	64	65	70	65	75	78	70	62	1		3.85288	3.67857	3.79795	3.85821	4.06757	3.89941	4.23483	4.16488	3.85259
	0.180614	0.164909	1.1211	High	Q9H1A3	Protein-L-histidine N-pros-methyltransferase OS=Homo sapiens OX=9606	METTL9			0.171264	0.70587	5.595	6	1	10	1	318	36.5	7.36	1	3		1	1			1	1	1	1		1		-4.64435	-4.78335	-5.53559	-5.07626	-4.98595	-4.40636	-4.86836	-4.77419	-6.00455
	2.21874	0.164848	1.12105	High	P13693	Translationally-controlled tumor protein OS=Homo sapiens OX=9606	TPT1			2.53719	0.0588613	94.795	47	6	1285	6	172	19.6	4.93	37	55	44	52	52	68	67	63	67	81	72	80	1		3.92982	3.89551	3.92213	4.03116	4.13241	4.07843	4.38785	4.17322	4.23229
	0.214922	0.164373	1.12068	High	Q8IZ07	Ankyrin repeat domain-containing protein 13A OS=Homo sapiens OX=9606	ANKRD13A			0.128847	0.762667	12.762	6	3	32	3	590	67.6	5.02	4	1	2	2	1	3	2		4	3	4	2	1		-1.27692	-1.91107	-1.92167	-1.49328	-1.20516	-1.9181	-1.78563	-1.3139	-1.41223
	0.710527	0.164293	1.12062	High	P62891	60S ribosomal protein L39 OS=Homo sapiens OX=9606	RPL39			0.808352	0.254292	23.322	20	1	280	1	51	6.4	12.56	10	7	8	9	8	9	7	11	10	10	9	8	1		1.55077	1.71389	1.65091	1.64955	1.97469	1.78421	1.81059	1.818	1.81058
	1.6284	0.164264	1.12059	High	Q9BYD6	39S ribosomal protein L1, mitochondrial OS=Homo sapiens OX=9606	MRPL1			1.53829	0.116039	18	13	3	62	3	325	36.9	8.78	4	2	7	6	5	3	6	6	4	7	3	2	1		0.0696611	0.152362	0.185739	0.243371	0.348221	0.308962	0.219128	0.362969	0.303247
	1.67893	0.164149	1.1205	High	Q8WVC6	Dephospho-CoA kinase domain-containing protein OS=Homo sapiens OX=9606	DCAKD			2.21583	0.0631255	19.318	19	4	87	4	231	26.5	9.58	6	9	9	7	7	4	5	5	10	8	7	6	1		0.072875	0.111825	0.163243	0.341763	0.217373	0.281254	0.295643	0.297736	0.375555
	1.21833	0.164139	1.1205	High	Q9BTU6	Phosphatidylinositol 4-kinase type 2-alpha OS=Homo sapiens OX=9606	PI4K2A			1.39674	0.128435	29.958	19	7	160	7	479	54	8.29	13	11	10	8	9	8	9	7	12	12	10	11	1		-0.327777	-0.247582	-0.428042	-0.169486	-0.108744	-0.232756	-0.178032	-0.161653	-0.0184708
	0.795007	0.163965	1.12036	High	P62913	60S ribosomal protein L11 OS=Homo sapiens OX=9606	RPL11			1.11663	0.177092	67.71	54	9	2401	9	178	20.2	9.6	26	37	30	33	24	32	33	51	28	43	37	41	1	Met-loss+Acetyl [N-Term]	3.81753	3.58692	3.788	3.87658	3.79792	4.00984	3.92529	4.02915	3.92523
	0.980401	0.16393	1.12033	High	P62244	40S ribosomal protein S15a OS=Homo sapiens OX=9606	RPS15A			1.44338	0.12538	91.64	59	9	1199	9	130	14.8	10.13	22	35	30	28	24	29	29	27	31	23	23	24	1		3.13743	3.04604	3.17386	3.15225	3.31296	3.38391	3.39301	3.28786	3.39508
	0.703503	0.163741	1.12019	High	Q562R1	Beta-actin-like protein 2 OS=Homo sapiens OX=9606	ACTBL2			1.05451	0.18841	214.835	57	14	7254	6	376	42	5.59	297	319	290	356	280	334	343	350	291	318	358	307	1		8.50805	8.22989	8.51998	8.49155	8.65332	8.60427	8.65857	8.65687	8.63566
	1.12421	0.16374	1.12019	High	P51648	Aldehyde dehydrogenase family 3 member A2 OS=Homo sapiens OX=9606	ALDH3A2			0.658858	0.309254	46.302	25	10	226	9	485	54.8	7.88	16	22	17	18	14	24	16	13	13	18	20	23	1		0.806996	0.956906	1.00976	1.05704	1.05618	1.15166	0.939165	1.06326	1.26315
	0.356058	0.163129	1.11971	High	P09493	Tropomyosin alpha-1 chain OS=Homo sapiens OX=9606	TPM1			0.557458	0.360976	48.188	23	8	1151	3	284	32.7	4.74	55	57	50	55	63	54	65	59	58	67	69	72	1		0.933064	0.701493	1.08417	0.848107	0.992352	1.36765	1.12949	1.22464	1.20669
	0.571011	0.163119	1.11971	High	P07992	DNA excision repair protein ERCC-1 OS=Homo sapiens OX=9606	ERCC1			0.675405	0.302682	11.417	11	2	20	2	297	32.5	6.25	2	2	1	1	2	1	2	2	2	2	1	2	1		-2.71194	-2.76967	-2.99206	-2.54105	-2.59639	-2.84687	-2.69552	-2.62238	-2.42766
	0.405164	0.163109	1.1197	High	Q9H223	EH domain-containing protein 4 OS=Homo sapiens OX=9606	EHD4			0.35573	0.504614	42.18	25	10	181	6	541	61.1	6.76	9	16	13	15	15	12	17	20	13	17	13	9	1		0.787389	0.357339	0.594697	0.893418	0.51269	0.822643	0.728811	0.76965	0.747486
	1.48998	0.163083	1.11968	High	Q07065	Cytoskeleton-associated protein 4 OS=Homo sapiens OX=9606	CKAP4			1.96458	0.0765387	246.606	57	30	3671	30	602	66	5.92	146	166	164	178	171	159	168	183	163	188	175	190	1		6.13765	6.02808	6.18778	6.27766	6.25046	6.31464	6.32534	6.30185	6.42932
	0.275371	0.162533	1.11925	High	Q9NW13	RNA-binding protein 28 OS=Homo sapiens OX=9606	RBM28			0.145107	0.739225	45.082	15	9	143	9	759	85.7	9.22							1		1	1			1	Met-loss+Acetyl [N-Term]	-0.531896	-0.735244	-0.559997	-0.861182	-0.0738869	-0.404467	-0.288738	-0.730739	-0.881519
	0.872	0.162314	1.11908	High	P43155	Carnitine O-acetyltransferase OS=Homo sapiens OX=9606	CRAT			0.900284	0.220325	24.227	11	5	136	5	626	70.8	8.44	10	11	8	13	9	14	11	11	9	15	9	13	1		-0.252959	0.00702953	-0.0270777	0.118707	0.0181484	0.0770798	0.131466	-0.00811481	0.198187
	0.125828	0.162297	1.11907	High	Q93063	Exostosin-2 OS=Homo sapiens OX=9606	EXT2			0.29483	0.562165	8.096	3	1	7	1	718	82.2	6.55	1					1	1	1	1		1	1	1		-4.67371	-4.6397	-3.69668	-4.46962	-3.48223	-4.57135	-4.31406	-4.64436	-5.12395
	0.688477	0.162206	1.119	High	Q9P0M9	39S ribosomal protein L27, mitochondrial OS=Homo sapiens OX=9606	MRPL27			0.909687	0.217872	8.589	14	2	41	2	148	16.1	10.42	3	1	2	1	3	3	4	5	6	2	2	3	1		-1.0226	-1.16551	-0.84563	-0.825442	-0.952477	-0.769196	-0.785202	-0.851623	-0.550024
	0.292953	0.162171	1.11897	High	Q15007	Pre-mRNA-splicing regulator WTAP OS=Homo sapiens OX=9606	WTAP			0.305635	0.552641	27.62	13	4	46	4	396	44.2	5.19													1		-1.74761	-1.62839	-1.88214	-1.83721	-1.16896	-1.76546	-1.76664	-1.93583	-1.7642
	2.06637	0.161963	1.11881	High	P12814	Alpha-actinin-1 OS=Homo sapiens OX=9606	ACTN1			2.6539	0.0551453	666.196	76	55	8799	35	892	103	5.41	301	364	380	359	341	379	407	410	412	447	435	404	1	Acetyl [N-Term]	5.18779	5.15292	5.21563	5.33094	5.30864	5.40266	5.54867	5.41783	5.42527
	1.53956	0.161692	1.1186	High	Q6PIU2	Neutral cholesterol ester hydrolase 1 OS=Homo sapiens OX=9606	NCEH1			2.08238	0.0692068	57.904	34	9	415	9	408	45.8	7.23	23	24	27	21	22	20	24	23	25	25	25	29	1		1.8619	1.86307	1.96871	2.03416	2.01948	2.12512	2.06795	2.11217	2.17451
	0.457019	0.161243	1.11825	High	Q07955	Serine/arginine-rich splicing factor 1 OS=Homo sapiens OX=9606	SRSF1			1.13742	0.174228	74.911	37	11	1908	11	248	27.7	10.36	30	40	28	29	28	29	42	44	40	42	46	39	1		2.24445	1.83555	2.12429	2.04587	2.32965	2.31251	2.49862	2.47306	2.35314
	0.913533	0.161233	1.11824	High	Q9NX40	OCIA domain-containing protein 1 OS=Homo sapiens OX=9606	OCIAD1			0.962032	0.207172	43.2	29	7	284	7	245	27.6	7.49	13	14	15	15	11	14	9	16	14	13	16	13	1		1.69052	1.8943	1.78692	1.89615	2.06714	1.89215	2.0235	1.87595	2.02749
	1.94377	0.160836	1.11793	High	O00425	Insulin-like growth factor 2 mRNA-binding protein 3 OS=Homo sapiens OX=9606	IGF2BP3			1.29349	0.14391	131.742	33	16	1251	13	579	63.7	8.87	21	31	29	29	30	34	31	26	31	30	22	32	1		3.12962	3.07044	3.12674	3.20834	3.29891	3.30206	3.32836	3.15279	3.35751
	0.532423	0.160777	1.11789	High	Q6UXH1	Protein disulfide isomerase CRELD2 OS=Homo sapiens OX=9606	CRELD2			0.312143	0.545912	3.759	3	1	37	1	353	38.2	4.59	2	1	2	4	2	2	2	2	1	1	4	2	1		-1.71943	-1.95359	-1.61187	-1.75567	-1.45554	-1.59135	-2.08031	-1.83248	-1.51706
	0.867858	0.160619	1.11777	High	Q9BUR5	MICOS complex subunit MIC26 OS=Homo sapiens OX=9606	APOO			1.12423	0.175968	39.848	33	4	77	4	198	22.3	9.13	4	3	7	5	7	5	4	5	7	8	7	9	1		-0.753997	-0.610476	-0.702178	-0.642806	-0.555386	-0.386602	-0.404951	-0.56581	-0.352303
	1.5767	0.160572	1.11773	High	Q9BRJ2	39S ribosomal protein L45, mitochondrial OS=Homo sapiens OX=9606	MRPL45			2.06863	0.0704698	39.227	34	7	282	7	306	35.3	9.03	15	18	18	19	17	14	15	22	19	18	23	18	1		0.857858	0.851167	0.770017	1.05085	0.921587	0.988323	1.01896	0.970714	1.02218
	0.763249	0.160559	1.11772	High	P09651	Heterogeneous nuclear ribonucleoprotein A1 OS=Homo sapiens OX=9606	HNRNPA1			1.66193	0.102303	180.771	51	15	3368	12	372	38.7	9.13	27	38	31	26	28	30	49	37	47	42	44	43	1		3.318	3.29356	3.12318	3.26137	3.51312	3.44192	3.64918	3.59866	3.50469
	0.992255	0.160462	1.11765	High	Q12931	Heat shock protein 75 kDa, mitochondrial OS=Homo sapiens OX=9606	TRAP1			1.58894	0.108773	100.32	25	14	931	13	704	80.1	8.21	54	47	59	58	48	53	63	54	55	56	54	55	1		2.34941	2.32132	2.56121	2.56799	2.57945	2.56589	2.84615	2.6274	2.68603
	0.735281	0.160339	1.11755	High	P49720	Proteasome subunit beta type-3 OS=Homo sapiens OX=9606	PSMB3			0.892846	0.223459	44.794	37	6	536	6	205	22.9	6.55	29	35	27	31	18	21	21	27	23	33	24	21	1		2.20765	2.06759	2.06389	2.25644	2.13006	2.43365	2.53933	2.24855	2.33114
	1.88398	0.160245	1.11748	High	Q15814	Tubulin-specific chaperone C OS=Homo sapiens OX=9606	TBCC			2.38717	0.059558	15.388	17	4	40	4	346	39.2	5.71	6	1	3	3	5	1	2	5	6	2	2	2	1		-0.923766	-1.00604	-0.909566	-0.788871	-0.745792	-0.823977	-0.192514	-0.458625	-0.578934
	0.841915	0.160142	1.1174	High	O15439	ATP-binding cassette sub-family C member 4 OS=Homo sapiens OX=9606	ABCC4			1.69513	0.0998095	21.537	6	6	109	6	1325	149.4	8.19	1				1		2	1	2	1		2	1		-1.53168	-1.50729	-1.65044	-1.31429	-1.55514	-1.33955	-1.24972	-1.3137	-1.17588
	0.763437	0.159909	1.11722	High	Q03518	Antigen peptide transporter 1 OS=Homo sapiens OX=9606	TAP1			0.702391	0.292796	32.5	9	3	68	3	748	80.9	7.31	4	2	6	5	5	5	8	7	6	6	8	6	1		-0.695884	-0.825942	-0.614223	-0.464206	-0.699347	-0.492769	-0.635021	-0.571462	-0.556351
	0.419712	0.159245	1.1167	High	Q8WWY3	U4/U6 small nuclear ribonucleoprotein Prp31 OS=Homo sapiens OX=9606	PRPF31			0.146504	0.737048	46.022	20	7	132	7	499	55.4	5.78	5	2	2	2	3	4	8	6	5	2	7	2	1		-0.490485	-0.272916	-0.138139	-0.314673	0.101225	-0.210356	-0.0968208	-0.0401201	-0.564358
	1.75097	0.158951	1.11647	High	P82650	28S ribosomal protein S22, mitochondrial OS=Homo sapiens OX=9606	MRPS22			2.25878	0.062026	65.648	33	9	362	9	360	41.3	7.9	22	16	21	21	27	27	29	22	27	22	23	25	1		1.77144	1.65634	1.75098	1.90403	1.84446	1.90713	1.98141	2.00575	1.88603
	1.47947	0.158459	1.11609	High	Q8NBX0	Saccharopine dehydrogenase-like oxidoreductase OS=Homo sapiens OX=9606	SCCPDH			1.99078	0.0750964	87.781	42	9	235	9	429	47.1	9.14	13	15	12	16	11	10	16	19	15	18	14	17	1	Met-loss+Acetyl [N-Term]	1.76272	1.74478	1.88834	1.92689	1.94784	1.99649	1.9666	1.97345	2.03485
	1.39362	0.157922	1.11568	High	P53007	Tricarboxylate transport protein, mitochondrial OS=Homo sapiens OX=9606	SLC25A1			1.23524	0.155216	32.419	13	4	306	4	311	34	9.89	13	14	13	17	9	15	12	15	21	18	13	23	1		1.50083	1.41997	1.40242	1.52667	1.67638	1.59394	1.67012	1.53244	1.78983
	0.488138	0.157722	1.11552	High	Q9BU61	NADH dehydrogenase [ubiquinone] 1 alpha subcomplex assembly factor 3 OS=Homo sapiens OX=9606	NDUFAF3			0.502059	0.391671	12.562	21	2	31	2	184	20.3	8.22	1	2	3		3	3	4	2	3		3	2	1		-2.25163	-2.21412	-2.52883	-1.99258	-2.33646	-2.19238	-2.12984	-2.17798	-2.15733
	0.4468	0.157136	1.11507	High	P21283	V-type proton ATPase subunit C 1 OS=Homo sapiens OX=9606	ATP6V1C1			1.05147	0.18927	26.848	24	6	112	6	382	43.9	7.46	4	4	3	3	3	5	3	4	3	3	3	3	1		-0.688666	-0.806571	-1.01051	-0.573062	-0.546755	-0.914526	-0.532265	-0.49903	-0.452988
	0.250548	0.156421	1.11452	High	Q9NXV6	CDKN2A-interacting protein OS=Homo sapiens OX=9606	CDKN2AIP			0.212427	0.651928	15.141	8	3	60	3	580	61.1	9.01	3	3	1	2	2	3	1	3	3		2	2	1		-1.87088	-2.68948	-2.1491	-2.01443	-2.02796	-2.19781	-1.85288	-2.01412	-2.19149
	3.37485	0.15631	1.11443	High	P39656	Dolichyl-diphosphooligosaccharide--protein glycosyltransferase 48 kDa subunit OS=Homo sapiens OX=9606	DDOST			1.51124	0.118853	166.144	48	15	2266	15	456	50.8	6.55	63	86	77	76	80	91	87	90	82	105	105	110	1		4.22846	4.19944	4.22288	4.38139	4.35058	4.38774	4.50143	4.31271	4.60802
	1.51818	0.156306	1.11443	High	Q8N543	Prolyl 3-hydroxylase OGFOD1 OS=Homo sapiens OX=9606	OGFOD1			1.76262	0.0926638	23.535	10	3	50	3	542	63.2	5.11	4	3	4	5	4	5	5	4	4	3	4	5	1		-1.30482	-1.38904	-1.41083	-1.14265	-1.25395	-1.23917	-1.34484	-1.35979	-1.31653
	0.53204	0.156283	1.11441	High	Q99720	Sigma non-opioid intracellular receptor 1 OS=Homo sapiens OX=9606	SIGMAR1			0.452978	0.423172	39.302	29	3	278	3	223	25.1	5.96	15	19	18	20	16	17	17	16	15	15	15	19	1		1.03737	0.965676	0.782973	1.06276	0.915293	1.27681	1.1096	0.967116	1.31082
	0.958675	0.155795	1.11404	High	O00148	ATP-dependent RNA helicase DDX39A OS=Homo sapiens OX=9606	DDX39A	+	Cluster -67	3.32041	0.0368205	171.276	48	18	2219	9	427	49.1	5.68	55	57	53	57	52	59	54	63	62	63	64	64	1	Met-loss+Acetyl [N-Term]	0.811715	0.976054	0.951648	1.00773	1.18135	1.01773	1.61979	1.43086	1.54876
	0.489057	0.155794	1.11403	High	O75298	Reticulon-2 OS=Homo sapiens OX=9606	RTN2			1.03895	0.191373	5.624	5	2	13	2	545	59.2	5.31	1	2		1	1			3		2	1	2	1		-0.679183	-0.993297	-0.624137	-0.543498	-0.764475	-0.521261	-0.426167	-0.388902	-0.524189
	0.861253	0.155676	1.11394	High	P11310	Medium-chain specific acyl-CoA dehydrogenase, mitochondrial OS=Homo sapiens OX=9606	ACADM			1.34232	0.137603	37.485	25	7	315	7	421	46.6	8.37	19	25	23	28	24	26	22	18	26	19	20	29	1		1.30444	1.24899	1.3083	1.42402	1.31157	1.59317	1.63161	1.45673	1.77273
	0.0838359	0.155525	1.11383	High	Q9NVM9	Integrator complex subunit 13 OS=Homo sapiens OX=9606	INTS13			0.0384104	0.914659	15.342	8	5	23	5	706	80.2	6.7													1		-2.16804	-1.76384	-2.87977	-1.44392	-3.2488	-1.65236	-1.9004	-2.01742	-3.2375
	0.467736	0.155034	1.11345	High	Q9UBM7	7-dehydrocholesterol reductase OS=Homo sapiens OX=9606	DHCR7			0.520289	0.381211	19.602	15	4	45	4	475	54.5	8.7	5	2	1	1	2	3	3	4	3	4	3	4	1		-0.280425	-0.167373	-0.575866	-0.236867	-0.037077	-0.284616	-0.191223	-0.145268	-0.11186
	1.07644	0.155014	1.11343	High	P80723	Brain acid soluble protein 1 OS=Homo sapiens OX=9606	BASP1			0.849172	0.239192	97.967	42	6	212	6	227	22.7	4.63	8	8	7	9	7	10	7	6	6	6	6	10	1		2.69803	2.69281	2.6439	2.78288	2.9631	2.7538	2.70323	2.76917	2.8627
	1.63982	0.154896	1.11334	High	P11177	Pyruvate dehydrogenase E1 component subunit beta, mitochondrial OS=Homo sapiens OX=9606	PDHB			2.46993	0.06344	86.521	44	10	553	10	359	39.2	6.65	21	29	27	33	31	31	33	27	39	39	31	37	1		2.11688	2.05614	2.18865	2.29521	2.23581	2.29534	2.47203	2.33765	2.50351
	1.32398	0.154779	1.11325	High	O95202	Mitochondrial proton/calcium exchanger protein OS=Homo sapiens OX=9606	LETM1			2.02095	0.0721132	131.463	29	14	551	14	739	83.3	6.7	39	38	29	38	42	36	38	43	50	39	31	41	1		2.48314	2.54192	2.40303	2.56648	2.63103	2.69491	2.69839	2.6576	2.72297
	0.571267	0.154509	1.11304	High	Q9BW92	Threonine--tRNA ligase, mitochondrial OS=Homo sapiens OX=9606	TARS2			0.824194	0.246914	27.126	9	5	62	5	718	81	7.3	6	3	4	4	6	4	7	4	5	4	6	8	1		-0.561509	-0.728023	-0.337367	-0.45885	-0.38694	-0.317583	-0.26506	-0.414016	-0.105154
	0.311029	0.154151	1.11277	High	P03905	NADH-ubiquinone oxidoreductase chain 4 OS=Homo sapiens OX=9606	MT-ND4			1.23133	0.155887	29.982	12	4	79	4	459	51.5	9.35	1	2	1	2	3	4	4	2	3	6	2	6	1		0.0859632	-0.0557566	-0.313342	0.362531	0.0228958	-0.206108	0.707455	0.253076	0.508457
	1.05535	0.154082	1.11271	High	Q9BUN8	Derlin-1 OS=Homo sapiens OX=9606	DERL1			1.05736	0.188032	6.366	8	2	77	2	251	28.8	9.51	4	4	4	3	4	4	9	5	7	3	5	6	1	Met-loss+Acetyl [N-Term]	-1.22726	-1.16703	-1.27721	-1.16155	-0.954893	-1.09281	-1.12597	-0.999183	-1.09578
	0.568193	0.153929	1.1126	High	P00387	NADH-cytochrome b5 reductase 3 OS=Homo sapiens OX=9606	CYB5R3			0.43634	0.435981	194.202	58	13	1441	13	301	34.2	7.59	66	84	74	77	76	99	78	93	77	96	83	92	1		4.77807	4.6676	4.72049	4.93377	4.6523	5.04188	4.99838	4.68956	5.14052
	0.904996	0.153652	1.11238	High	Q8NCH0	Carbohydrate sulfotransferase 14 OS=Homo sapiens OX=9606	CHST14			1.32443	0.139709	25.694	18	6	151	6	376	43	9.48	10	6	6	11	9	11	9	10	9	9	12	15	1		-0.350448	-0.269256	-0.185168	0.0116777	-0.172134	-0.18346	-0.0140553	-0.110984	-0.0148087
	1.4635	0.15325	1.11207	High	Q8NC56	LEM domain-containing protein 2 OS=Homo sapiens OX=9606	LEMD2			0.788551	0.26242	35.304	20	7	137	7	503	56.9	9	6	9	5	6	8	4	9	5	2	3	3	5	1	Met-loss+Acetyl [N-Term]	0.413678	0.346002	0.511031	0.566052	0.571457	0.592951	0.377609	0.511792	0.614357
	0.103294	0.153165	1.11201	High	Q8IY37	Probable ATP-dependent RNA helicase DHX37 OS=Homo sapiens OX=9606	DHX37			1.00083	0.199151	8.716	3	2	19	2	1157	129.5	8.1													1		-5.27496	-4.2982	-5.33821	-4.3295	-5.64058	-4.4818	-5.5592	-5.96191	-6.43655
	1.32018	0.152938	1.11183	High	P40429	60S ribosomal protein L13a OS=Homo sapiens OX=9606	RPL13A			1.79641	0.0909746	50.405	35	8	1034	8	203	23.6	10.93	21	17	16	17	27	18	23	24	27	23	26	28	1	Met-loss+Acetyl [N-Term]	2.62017	2.57876	2.58909	2.70307	2.85424	2.68952	2.82617	2.86554	2.74623
	0.293461	0.152458	1.11146	High	Q92934	Bcl2-associated agonist of cell death OS=Homo sapiens OX=9606	BAD			0.477719	0.408688	19.944	28	2	14	2	168	18.4	7.15	3	1	1	2	1	1		1	1		1	2	1		-1.87349	-2.15264	-1.53314	-1.52796	-1.90602	-1.66792	-1.80132	-1.41186	-1.3237
	0.113228	0.152213	1.11127	High	Q9NUS5	AP-5 complex subunit sigma-1 OS=Homo sapiens OX=9606	AP5S1			0.210215	0.654725	3.85	10	1	7	1	200	22.5	6.87	1		1		1				2		1	1	1		-4.44008	-3.93117	-5.5726	-4.52623	-4.39978	-4.5612	-4.53738	-3.85978	-4.24619
	2.77295	0.15189	1.11102	High	O00303	Eukaryotic translation initiation factor 3 subunit F OS=Homo sapiens OX=9606	EIF3F			1.31299	0.14146	94.531	37	9	772	9	357	37.5	5.45	36	44	36	35	45	37	45	38	41	36	34	34	1		3.30359	3.27901	3.24182	3.44437	3.41263	3.42309	3.53701	3.45666	3.31317
	1.6772	0.151606	1.11081	High	Q13813	Spectrin alpha chain, non-erythrocytic 1 OS=Homo sapiens OX=9606	SPTAN1			1.29463	0.14438	1052.11	57	116	8191	116	2472	284.4	5.35	244	226	236	228	233	237	269	271	298	309	261	253	1		5.48948	5.49317	5.44848	5.5884	5.70565	5.59191	5.87971	5.6471	5.61839
	0.293095	0.151571	1.11078	High	Q14814	Myocyte-specific enhancer factor 2D OS=Homo sapiens OX=9606	MEF2D			0.159693	0.720612	6.003	5	1	6	1	521	55.9	7.88			1	1		1			2		1		1		-3.00167	-2.9102	-3.02246	-2.81682	-3.18903	-2.47377	-2.97575	-2.92415	-2.86247
	0.852391	0.151019	1.11035	High	P16989	Y-box-binding protein 3 OS=Homo sapiens OX=9606	YBX3			0.543986	0.367542	92.84	33	10	960	6	372	40.1	9.77	22	26	24	24	24	25	22	26	18	20	24	14	1		1.85356	1.69756	1.95971	1.98198	2.04493	1.93696	2.00991	1.78729	1.92933
	0.177323	0.151012	1.11035	High	Q96F85	CB1 cannabinoid receptor-interacting protein 1 OS=Homo sapiens OX=9606	CNRIP1			0.325793	0.533647	11.744	41	3	21	3	164	18.6	7.94	3	1	3	1	1	2	3	3	2		2		1		-1.16875	-1.16026	-1.98299	-1.31108	-0.974163	-1.57372	-1.16305	-1.01183	-1.09653
	0.091906	0.150841	1.11022	High	Q92979	Ribosomal RNA small subunit methyltransferase NEP1 OS=Homo sapiens OX=9606	EMG1			0.184328	0.688103	12.484	17	3	29	3	244	26.7	9.17	1	1	1	1	1		2	2	2	2	3	2	1		-2.20325	-2.31144	-0.625457	-1.98182	-1.4199	-1.28591	-1.86282	-2.06818	-2.11217
	0.254916	0.15052	1.10997	High	Q2TAA5	GDP-Man:Man(3)GlcNAc(2)-PP-Dol alpha-1,2-mannosyltransferase OS=Homo sapiens OX=9606	ALG11			0.662021	0.308579	5.476	2	1	7	1	492	55.6	8.48			1			1		1	1	1	1	1	1		-3.27296	-3.26457	-3.7915	-3.17785	-3.60303	-3.0966	-2.89016	-3.3225	-2.6733
	0.211461	0.149808	1.10942	High	P35813	Protein phosphatase 1A OS=Homo sapiens OX=9606	PPM1A			0.304739	0.552571	25.908	15	4	45	2	382	42.4	5.36	5	3	4	7	6	4	3	5	1	2	3	2	1		-1.62328	-1.72111	-1.09531	-1.46852	-1.57507	-0.946682	-1.59424	-1.30201	-2.37432
	1.91623	0.149715	1.10935	High	Q9Y2Q3	Glutathione S-transferase kappa 1 OS=Homo sapiens OX=9606	GSTK1			1.70424	0.0987014	129.937	63	10	795	10	226	25.5	8.41	40	44	50	54	58	57	51	59	52	50	44	61	1		3.33019	3.39374	3.37077	3.55097	3.45743	3.53546	3.55778	3.47909	3.66496
	1.07572	0.149638	1.10929	High	P46777	60S ribosomal protein L5 OS=Homo sapiens OX=9606	RPL5			2.03769	0.0719228	220.498	60	19	2531	19	297	34.3	9.72	68	54	59	70	79	74	80	70	73	78	81	67	1		4.35063	4.23307	4.28791	4.35847	4.54706	4.41499	4.56894	4.72659	4.56193
	1.99644	0.149568	1.10924	High	Q9GZT3	SRA stem-loop-interacting RNA-binding protein, mitochondrial OS=Homo sapiens OX=9606	SLIRP			1.42793	0.126337	41	65	7	346	7	109	12.3	10.24	13	22	24	23	21	25	20	20	22	28	20	26	1		2.91744	2.863	2.96087	3.09329	3.03818	3.05854	3.1241	2.99628	3.22712
	0.322628	0.149555	1.10923	High	Q9NPJ3	Acyl-coenzyme A thioesterase 13 OS=Homo sapiens OX=9606	ACOT13			0.847827	0.239676	14.442	31	2	69	2	140	15	9.14	4	4	5	1	6	3	4	4	5	4	4	1	1		-0.934352	-0.817338	-1.15978	-1.14028	-0.703577	-0.618952	-0.741554	-0.517831	-0.468903
	0.278013	0.149197	1.10895	High	Q9UI26	Importin-11 OS=Homo sapiens OX=9606	IPO11			0.121339	0.773475	30.748	8	5	56	5	975	112.5	5.25	5	2	5	4	2	3	5	4	5	4	4	7	1		-0.971448	-0.563804	-1.13002	-0.993472	-0.535946	-0.688259	-0.925343	-0.564157	-1.20086
	0.400337	0.148879	1.10871	High	Q9NZD8	Maspardin OS=Homo sapiens OX=9606	SPG21			0.543433	0.367937	21.527	19	4	61	4	308	34.9	6.28	5	7	6	6	6	4	3	2	5	5	3	8	1		-1.31413	-1.50903	-1.60943	-1.12683	-1.5753	-1.28382	-1.49783	-1.65415	-1.53452
	1.12363	0.14874	1.1086	High	O43837	Isocitrate dehydrogenase [NAD] subunit beta, mitochondrial OS=Homo sapiens OX=9606	IDH3B			0.781714	0.266418	52.646	29	7	148	7	385	42.2	8.46	12	8	10	14	12	17	14	15	10	9	9	14	1		0.700418	0.789416	0.866141	0.918126	1.00954	0.874529	0.830765	0.840693	1.00802
	0.385491	0.148539	1.10845	High	Q96B26	Exosome complex component RRP43 OS=Homo sapiens OX=9606	EXOSC8			0.30098	0.555996	15.24	22	3	21	3	276	30	5.3		1	1			2		1				1	1		-2.8076	-2.51076	-2.74378	-2.7708	-2.5419	-2.30382	-2.18628	-2.67738	-2.54382
	1.10186	0.148354	1.1083	High	P47972	Neuronal pentraxin-2 OS=Homo sapiens OX=9606	NPTX2			0.419724	0.449487	44.791	20	6	558	6	431	47	5.63	25	25	26	19	30	31	33	29	25	21	25	27	1		2.00837	2.19732	2.11612	2.19218	2.28276	2.29193	2.07499	2.03093	2.36515
	0.223465	0.148237	1.10821	High	P01034	Cystatin-C OS=Homo sapiens OX=9606	CST3			0.497238	0.394617	22.896	31	4	63	4	146	15.8	8.75	3	2	3	2	4	2	3	2	2	2	1	5	1		-1.09473	-0.518455	-1.1466	-0.653438	-0.567659	-1.09398	-0.639936	-0.509833	-0.543489
	1.24765	0.148137	1.10814	High	P10301	Ras-related protein R-Ras OS=Homo sapiens OX=9606	RRAS			1.74241	0.0941305	46.181	53	8	525	6	218	23.5	6.93	25	28	25	26	21	30	27	32	25	23	25	24	1		0.883616	0.862107	0.930009	0.947	1.04627	1.12687	1.16182	1.04428	1.20628
	0.610765	0.147978	1.10802	High	P02792	Ferritin light chain OS=Homo sapiens OX=9606	FTL			0.677235	0.301794	44.259	29	4	252	4	175	20	5.78	19	19	23	16	22	21	19	15	17	21	15	16	1		1.35396	1.32726	1.14811	1.59912	1.33185	1.34231	1.49916	1.35406	1.62964
	0.653822	0.147867	1.10793	High	Q15836	Vesicle-associated membrane protein 3 OS=Homo sapiens OX=9606	VAMP3			0.745565	0.275827	22.427	33	2	202	2	100	11.3	8.79	8	11	9	15	11	9	12	15	9	12	10	11	1		0.428136	0.32507	0.569936	0.646226	0.442675	0.677841	0.742542	0.500085	0.794825
	0.265775	0.147631	1.10775	High	Q9H490	Phosphatidylinositol glycan anchor biosynthesis class U protein OS=Homo sapiens OX=9606	PIGU			0.853693	0.237828	23.234	14	5	89	5	435	50	7.72	8	5	6	3	6	5	9	9	10	9	3	12	1		-0.269629	-0.636735	-0.837901	-0.718106	-0.355543	-0.227724	-0.0875607	-0.24636	-0.120165
	0.807184	0.147363	1.10754	High	P0CG08	Golgi pH regulator B OS=Homo sapiens OX=9606	GPR89B			0.772543	0.268022	10.022	5	2	44	2	455	52.9	9.28	2	3	2	3	2	5	4	4	5	6	4	3	1		0.610715	0.723851	0.436887	0.763484	0.723297	0.726761	0.6628	0.77785	0.736025
	0.542994	0.146694	1.10703	High	P46776	60S ribosomal protein L27a OS=Homo sapiens OX=9606	RPL27A			1.23483	0.15515	49.772	30	6	1090	6	148	16.6	11	36	38	35	39	34	37	34	41	35	37	45	41	1		4.37313	4.18546	4.56515	4.43432	4.5327	4.59679	4.7312	4.6853	4.63242
	0.894617	0.14651	1.10689	High	P61289	Proteasome activator complex subunit 3 OS=Homo sapiens OX=9606	PSME3			0.522056	0.380536	85.79	41	11	859	11	254	29.5	5.95	45	48	59	60	60	68	49	59	51	66	52	54	1		2.82432	3.06812	2.91646	3.13851	3.05828	3.05164	2.96578	3.09545	2.80566
	0.702905	0.146443	1.10684	High	Q9BVK6	Transmembrane emp24 domain-containing protein 9 OS=Homo sapiens OX=9606	TMED9			1.41268	0.127523	62.128	35	6	455	5	235	27.3	8.02	17	20	17	23	24	26	27	26	31	29	33	34	1		2.32549	2.11367	2.33961	2.52659	2.33244	2.35906	2.48925	2.53092	2.60753
	0.571692	0.146362	1.10678	High	O43264	Centromere/kinetochore protein zw10 homolog OS=Homo sapiens OX=9606	ZW10			0.545367	0.367014	43.497	21	10	154	10	779	88.8	6.27	11	14	12	11	12	14	13	11	13	12	14	13	1		2.43815	2.19323	2.29167	2.37154	2.35884	2.63174	2.50613	2.35651	2.68055
	1.66398	0.146355	1.10677	High	O94826	Mitochondrial import receptor subunit TOM70 OS=Homo sapiens OX=9606	TOMM70			0.868496	0.232621	108.501	36	14	523	14	608	67.4	7.12	26	24	31	35	31	32	35	30	26	29	27	36	1		2.14989	2.09972	2.18928	2.2316	2.32273	2.32363	2.28398	2.11963	2.33825
	0.258329	0.146131	1.1066	High	Q96FX7	tRNA (adenine(58)-N(1))-methyltransferase catalytic subunit TRMT61A OS=Homo sapiens OX=9606	TRMT61A			0.256603	0.601424	30.791	38	5	73	5	289	31.4	7.36	1		1	2		3			1	1	1		1		-1.91563	-2.39171	-2.17611	-1.91058	-2.36226	-1.77222	-2.03878	-2.01651	-3.33903
	0.327127	0.145855	1.10639	High	Q92599	Septin-8 OS=Homo sapiens OX=9606	SEPTIN8			0.252884	0.604925	60.011	27	7	302	5	483	55.7	6.28	20	25	16	26	15	25	21	23	22	21	18	19	1		-0.543612	-1.09926	-0.566657	-0.550134	-0.582897	-0.638937	-0.691467	-0.978187	-0.654697
	0.962585	0.145611	1.1062	High	Q9BVC6	Transmembrane protein 109 OS=Homo sapiens OX=9606	TMEM109			1.00962	0.199053	9.219	5	1	205	1	243	26.2	10.48	14	12	8	15	13	10	12	13	16	12	16	13	1		1.77379	1.80633	1.92125	2.00817	1.87319	2.05683	2.08592	1.93377	1.98156
	0.664403	0.145554	1.10616	High	P02649	Apolipoprotein E OS=Homo sapiens OX=9606	APOE			0.46713	0.414786	9.483	9	3	50	3	317	36.1	5.73	6	3	4	6	1	4	3	4	6	4	2	2	1		-0.582252	-0.403792	-0.460183	-0.47111	-0.181633	-0.356823	-0.359493	-0.533006	-0.398405
	1.49888	0.145407	1.10604	High	Q9Y2R9	28S ribosomal protein S7, mitochondrial OS=Homo sapiens OX=9606	MRPS7			1.41436	0.127768	16.261	19	4	84	4	242	28.1	9.99	10	8	5	5	8	9	7	6	5	6	4	6	1		0.0854158	0.0204554	0.157193	0.250566	0.190611	0.258108	0.21221	0.210313	0.357035
	0.645889	0.144943	1.10569	High	Q8TEQ8	GPI ethanolamine phosphate transferase 3 OS=Homo sapiens OX=9606	PIGO			0.911085	0.217986	7.85	4	3	29	3	1089	118.6	8.12	2	2	1	1	4	1	4		2	6	2	1	1		-2.81592	-2.85114	-2.93899	-2.55904	-2.72567	-2.88651	-2.7264	-2.62139	-2.35977
	0.319384	0.144737	1.10553	High	Q16134	Electron transfer flavoprotein-ubiquinone oxidoreductase, mitochondrial OS=Homo sapiens OX=9606	ETFDH			0.711468	0.289817	8.266	10	3	16	3	617	68.5	7.55	2	2		2	1	3	2	1			1	2	1		-2.7295	-2.90123	-2.3987	-2.74946	-2.47462	-2.37114	-4.30522	-4.27805	-2.28317
	0.933794	0.144552	1.10539	High	P12694	2-oxoisovalerate dehydrogenase subunit alpha, mitochondrial OS=Homo sapiens OX=9606	BCKDHA			0.795267	0.260142	43.478	27	8	116	8	445	50.4	8.27	13	8	7	8	10	9	9	13	9	9	11	10	1		0.058568	0.174792	0.095933	0.348725	0.132898	0.281324	0.163034	0.189252	0.282795
	0.263933	0.144532	1.10537	High	Q9UPT9	Ubiquitin carboxyl-terminal hydrolase 22 OS=Homo sapiens OX=9606	USP22			0.165539	0.71167	20.043	14	4	62	4	525	59.9	8.05	8	1	5	2	9	5	3	4	6	2	8	6	1		0.779386	1.17097	0.454597	1.06051	0.958611	0.819422	0.879292	0.840961	0.685732
	0.216793	0.144495	1.10534	High	Q9BQ61	Telomerase RNA component interacting RNase OS=Homo sapiens OX=9606	TRIR			0.284707	0.572918	23.401	27	5	77	5	176	18.4	9.44	7	4	8	5	5	5	6	1	6	3	5	3	1		0.51904	0.419564	0.353875	0.168481	0.51302	1.04446	0.257414	0.521955	0.0933399
	1.01818	0.144135	1.10507	High	P04899	Guanine nucleotide-binding protein G(i) subunit alpha-2 OS=Homo sapiens OX=9606	GNAI2			1.62986	0.106335	175.174	55	18	1687	10	355	40.4	5.54	46	49	52	46	44	51	54	53	57	56	57	51	1		2.17837	2.10413	1.98538	2.17932	2.30015	2.22081	2.27395	2.36021	2.29863
	0.363401	0.144079	1.10502	High	Q96EP5	DAZ-associated protein 1 OS=Homo sapiens OX=9606	DAZAP1			0.477264	0.40874	61.859	30	7	262	7	407	43.4	8.56	5	3	5	3	4	5	4	5	2	3	5	6	1	Acetyl [N-Term]	0.523065	0.45674	0.0481367	0.345506	0.589861	0.524811	0.646185	0.430636	0.675352
	0.359027	0.143702	1.10474	High	Q8WVM0	Dimethyladenosine transferase 1, mitochondrial OS=Homo sapiens OX=9606	TFB1M			0.847529	0.239548	8.059	12	2	71	2	346	39.5	9.26	2	1	4		2	2	1	3	2	2	1	1	1		-2.84268	-2.59328	-2.86901	-2.34869	-2.70606	-2.81911	-2.34341	-2.52973	-2.42841
	0.243669	0.143517	1.10459	High	P08253	72 kDa type IV collagenase OS=Homo sapiens OX=9606	MMP2			0.122533	0.772198	67.232	22	10	432	10	660	73.8	5.47	11	12	9	15	15	16	15	20	12	17	13	19	1		1.0071	1.0535	1.49447	0.989425	1.55883	1.43736	1.12774	1.41654	1.39286
	0.17542	0.143484	1.10457	High	Q12965	Unconventional myosin-Ie OS=Homo sapiens OX=9606	MYO1E			0.055557	0.880753	26.636	8	6	36	6	1108	127	8.92	2	4	5	2	2	2	3	3	1	1		3	1		-1.36708	-1.65821	-1.46843	-1.77434	-0.777683	-1.51124	-2.1817	-2.25776	-0.45639
	0.317718	0.143062	1.10425	High	Q5VT52	Regulation of nuclear pre-mRNA domain-containing protein 2 OS=Homo sapiens OX=9606	RPRD2			0.240857	0.619427	52.672	12	9	54	9	1461	155.9	7.42	1								1				1		-1.87446	-1.85215	-1.85153	-2.07217	-1.45558	-1.6212	-1.92018	-1.73129	-2.00043
	0.797188	0.142683	1.10396	High	P24539	ATP synthase F(0) complex subunit B1, mitochondrial OS=Homo sapiens OX=9606	ATP5PB			0.939108	0.209952	55.842	36	8	541	8	256	28.9	9.36	27	24	33	25	31	28	28	29	31	31	27	37	1		3.12243	3.34743	3.26312	3.37429	3.4798	3.30694	3.43841	3.35008	3.45446
	0.172561	0.142657	1.10394	High	P25325	3-mercaptopyruvate sulfurtransferase OS=Homo sapiens OX=9606	MPST			0.0756947	0.844528	20.133	23	4	50	4	297	33.2	6.6	7	6	5	6	3	4	3	3	4	2	1	3	1		3.2073	3.48682	2.88443	3.15049	3.84894	3.00709	3.3366	3.14851	3.14208
	0.63975	0.142608	1.1039	High	Q6PGP7	Tetratricopeptide repeat protein 37 OS=Homo sapiens OX=9606	TTC37			0.204194	0.6633	64.426	12	12	132	12	1564	175.4	7.53	11	8	9	8	8	11	11	10	10	6	13	9	1		0.428178	0.347077	0.268601	0.39371	0.669172	0.408798	0.430256	0.773088	0.220942
	1.24282	0.142577	1.10388	High	P07954	Fumarate hydratase, mitochondrial OS=Homo sapiens OX=9606	FH			1.32722	0.139934	94.664	40	11	585	11	510	54.6	8.76	31	27	28	39	33	35	26	36	34	35	28	38	1		3.1308	3.04632	3.02059	3.21453	3.13229	3.27863	3.30875	3.1626	3.37422
	0.981947	0.142118	1.10352	High	P11717	Cation-independent mannose-6-phosphate receptor OS=Homo sapiens OX=9606	IGF2R			1.13014	0.175628	296.013	28	42	1425	42	2491	274.2	5.94	40	33	36	40	36	40	42	54	45	41	45	49	1		2.77376	2.57712	2.73328	2.77653	2.88421	2.84978	2.8063	2.88442	3.00301
	0.560153	0.142032	1.10346	High	Q16585	Beta-sarcoglycan OS=Homo sapiens OX=9606	SGCB			1.85973	0.08584	29.525	19	3	40	3	318	34.8	8.62	1				1			2	1	1	1	1	1		-2.87092	-2.50233	-2.77277	-2.61836	-2.5521	-2.54946	-2.2932	-2.35318	-2.29762
	0.326551	0.142008	1.10344	High	Q8NF37	Lysophosphatidylcholine acyltransferase 1 OS=Homo sapiens OX=9606	LPCAT1			0.256401	0.601635	11.018	8	2	60	2	534	59.1	6.02	6	6	3	8	6	4	2	5	7	5	3	5	1		-2.61258	-2.21592	-2.52942	-2.04969	-2.47359	-2.40861	-2.17793	-2.6613	-2.8317
	0.515752	0.141992	1.10343	High	Q6ZMG9	Ceramide synthase 6 OS=Homo sapiens OX=9606	CERS6			0.423399	0.447696	12.603	7	2	69	2	384	44.9	7.65	1	1	1	1		1	2	1	2	2	1	3	1		-2.00542	-2.13222	-2.24035	-2.13474	-2.02222	-1.79506	-1.94042	-2.0977	-1.89218
	0.393154	0.14164	1.10316	High	Q7Z6J9	tRNA-splicing endonuclease subunit Sen54 OS=Homo sapiens OX=9606	TSEN54			0.275443	0.583044	5.015	4	1	4	1	526	58.8	7.91	1				1	1				1			1		-4.49411	-4.41427	-4.65722	-4.13344	-4.41204	-4.59519	-4.4529	-4.36214	-4.41162
	1.75032	0.141471	1.10303	High	P10809	60 kDa heat shock protein, mitochondrial OS=Homo sapiens OX=9606	HSPD1			1.85339	0.0861485	432.689	69	39	6378	39	573	61	5.87	258	290	303	293	341	327	312	339	374	364	312	365	1		6.62967	6.7102	6.63316	6.82115	6.74886	6.82743	6.91153	6.77007	6.91114
	0.740785	0.141406	1.10298	High	Q13137	Calcium-binding and coiled-coil domain-containing protein 2 OS=Homo sapiens OX=9606	CALCOCO2			0.523263	0.379855	38.583	24	6	82	6	446	52.2	5.02	1	2	2	3	1	2	1	1		2	2	1	1	Acetyl [N-Term]	-1.32294	-1.36726	-1.27021	-1.32994	-1.16224	-1.04401	-1.24609	-1.6146	-1.27831
	1.15278	0.14135	1.10294	High	Q96S52	GPI transamidase component PIG-S OS=Homo sapiens OX=9606	PIGS			0.980645	0.203394	97.309	37	13	299	13	555	61.6	6.49	23	24	23	21	24	21	17	19	26	23	18	20	1		1.24542	1.24509	1.25512	1.45926	1.4348	1.27563	1.37909	1.30794	1.48466
	0.29582	0.141106	1.10275	High	P58335	Anthrax toxin receptor 2 OS=Homo sapiens OX=9606	ANTXR2			0.232819	0.628069	27.352	14	6	255	5	489	53.6	7.46	11	16	12	14	15	13	12	17	15	15	16	15	1		-1.64651	-1.4204	-1.06003	-1.15007	-1.41589	-1.13767	-1.24984	-1.42025	-1.57758
	1.75407	0.140786	1.10251	High	P30048	Thioredoxin-dependent peroxide reductase, mitochondrial OS=Homo sapiens OX=9606	PRDX3			1.03	0.193498	96.829	52	9	1170	9	256	27.7	7.78	48	62	60	57	60	57	58	64	56	53	66	56	1		4.45493	4.50252	4.51202	4.6403	4.57179	4.67974	4.61024	4.54999	4.78474
	0.767858	0.140376	1.10219	High	P62851	40S ribosomal protein S25 OS=Homo sapiens OX=9606	RPS25			1.6477	0.105239	26.218	24	4	1499	4	125	13.7	10.11	50	53	45	49	46	45	54	52	48	52	51	46	1		4.66618	4.49407	4.70729	4.6667	4.77205	4.84992	4.92939	4.85761	4.91171
	0.509987	0.139876	1.10181	High	Q96HD1	Protein disulfide isomerase CRELD1 OS=Homo sapiens OX=9606	CRELD1			0.366375	0.495323	4.836	4	1	4	1	420	45.4	4.87												1	1		-1.275	-1.13481	-1.0142	-0.956105	-0.866892	-1.18138	-0.868261	-1.06201	-1.09079
	0.272492	0.139652	1.10164	High	P62070	Ras-related protein R-Ras2 OS=Homo sapiens OX=9606	RRAS2			1.28354	0.145931	35.492	38	5	264	3	204	23.4	6.01	10	15	8	10	7	15	13	16	14	9	11	8	1		0.138516	0.0153875	-0.0936041	-0.225032	0.397839	0.306448	0.534409	0.541642	0.528439
	0.369621	0.139009	1.10115	High	P41223	Protein BUD31 homolog OS=Homo sapiens OX=9606	BUD31			0.76569	0.26952	25.606	46	6	220	6	144	17	8.82	13	7	14	9	12	12	16	13	8	7	12	10	1		-0.624949	-0.659293	-0.724509	-0.22148	-0.676012	-0.694233	-0.77389	-0.784791	-0.908226
	0.197041	0.138929	1.10109	High	Q9BQA9	Cytochrome b-245 chaperone 1 OS=Homo sapiens OX=9606	CYBC1			0.227345	0.634399	16.162	17	2	52	2	187	20.8	6.8	3	2	3	6	4	4	4	5	4	6	5	6	1		-0.67316	-0.722697	0.0747671	-0.426944	-0.144011	-0.333349	-0.444801	-0.327525	0.495039
	0.544458	0.138735	1.10094	High	Q15811	Intersectin-1 OS=Homo sapiens OX=9606	ITSN1			0.573297	0.353301	15.2	1	1	12	1	1721	195.3	7.77	1	1	1	1	1	1	1	1		1	1	1	1		-2.76908	-2.98421	-2.64111	-2.67142	-2.56463	-2.74214	-2.68504	-2.66319	-2.53361
	0.937688	0.138472	1.10074	High	Q8WUX9	Charged multivesicular body protein 7 OS=Homo sapiens OX=9606	CHMP7			1.66077	0.102405	10.295	9	3	19	3	453	50.9	5.35	5	1	3	3	1	3		2			1		1		-1.37152	-1.16912	-1.26387	-1.06546	-1.19273	-1.13091	-1.32368	-1.57444	-1.45179
	0.145974	0.138467	1.10073	High	Q9UIL1	Short coiled-coil protein OS=Homo sapiens OX=9606	SCOC			0.237743	0.622691	14.724	11	1	179	1	159	18	8.85	11	8	12	7	14	7	8	11	13	7	8	8	1		-0.8735	-0.636235	-1.69241	-1.11408	-0.636038	-1.03663	-0.698391	-2.87683	-1.13305
	0.142111	0.138081	1.10044	High	Q86UY6	N-alpha-acetyltransferase 40 OS=Homo sapiens OX=9606	NAA40			0.360354	0.50027	3.635	5	1	18	1	237	27.2	7.39		1	1								1		1		-3.1534	-3.33511	-3.54992	-3.49094	-2.52839	-3.60485	-3.65839	-3.52178	-3.65328
	0.383121	0.138037	1.10041	High	P49207	60S ribosomal protein L34 OS=Homo sapiens OX=9606	RPL34			0.282321	0.57532	6.479	13	2	647	2	117	13.3	11.47	16	26	22	26	20	25	25	26	21	25	30	27	1		2.88036	2.96134	3.0161	2.85418	3.35819	3.05954	3.10548	3.05662	3.05507
	0.273342	0.138036	1.10041	High	P00846	ATP synthase subunit a OS=Homo sapiens OX=9606	MT-ATP6			0.537489	0.371035	5.793	4	1	98	1	226	24.8	10.1	6	3	2	3	2	4	5	4	6	3	4	8	1		1.16531	0.703952	1.14559	1.3117	0.875198	1.24206	1.32348	1.13097	1.59848
	0.134846	0.137926	1.10032	High	Q9Y282	Endoplasmic reticulum-Golgi intermediate compartment protein 3 OS=Homo sapiens OX=9606	ERGIC3			0.346941	0.511989	13.699	6	2	31	2	383	43.2	6.06	3	1	1	1	1	1	2	4	7	2	3	2	1		-0.885409	-1.68525	-0.595557	-1.19372	-1.00495	-0.553762	-0.567509	-0.846604	-0.474655
	0.323274	0.137678	1.10013	High	Q9P032	NADH dehydrogenase [ubiquinone] 1 alpha subcomplex assembly factor 4 OS=Homo sapiens OX=9606	NDUFAF4			0.713792	0.28906	12.483	14	2	72	2	175	20.3	8.82	5	5	5	4	7	5	4	3	4	4	5	6	1		-1.00194	-0.899199	-1.45062	-0.984117	-1.05276	-0.901844	-0.795341	-0.777696	-0.871805
	0.250489	0.13766	1.10012	High	Q9Y2I1	Nischarin OS=Homo sapiens OX=9606	NISCH			0.0927291	0.815617	7.402	3	2	18	2	1504	166.5	5.14	3	1	2		2	1		2	4	1	2		1		-2.80048	-2.70542	-3.26203	-3.01351	-2.79121	-2.55023	-2.35461	-4.3315	-2.7137
	0.762605	0.137564	1.10005	High	Q5T653	39S ribosomal protein L2, mitochondrial OS=Homo sapiens OX=9606	MRPL2			0.572154	0.353649	34.129	23	4	207	4	305	33.3	11.3	13	11	11	16	11	13	13	13	11	15	17	14	1		0.840219	0.873296	0.67204	0.935456	1.02632	0.836475	0.836185	1.02779	0.883562
	0.448618	0.13755	1.10004	High	Q9UH62	Armadillo repeat-containing X-linked protein 3 OS=Homo sapiens OX=9606	ARMCX3			0.440608	0.432919	17.693	14	4	70	4	379	42.5	8.37	5	4	4	1	5	5	3	4	3	4	3	3	1		-0.182889	-0.493783	-0.197551	-0.203158	-0.269241	0.0108261	-0.0938988	-0.255507	0.105511
	0.503791	0.137359	1.09989	High	Q14011	Cold-inducible RNA-binding protein OS=Homo sapiens OX=9606	CIRBP			0.171861	0.705397	25.798	25	3	424	3	172	18.6	9.51	13	21	17	16	13	14	14	15	13	15	15	12	1		1.59951	1.28985	1.24651	1.4762	1.46953	1.6022	1.53481	1.57921	1.09522
	0.410945	0.137309	1.09985	High	Q8NBJ4	Golgi membrane protein 1 OS=Homo sapiens OX=9606	GOLM1			0.526458	0.378548	4.363	3	1	36	1	401	45.3	4.97	2	1	3	2	4	1	3	3	1	2	3	1	1		-3.26432	-2.96152	-3.26392	-3.05398	-2.84061	-3.18323	-3.07205	-2.85256	-2.91006
	1.54935	0.137094	1.09969	High	Q04837	Single-stranded DNA-binding protein, mitochondrial OS=Homo sapiens OX=9606	SSBP1			0.839712	0.241022	55.077	50	6	759	6	148	17.2	9.6	35	34	37	42	38	34	38	41	41	40	36	39	1		3.13831	3.18903	3.14234	3.2651	3.2481	3.36775	3.34059	3.14749	3.37204
	0.0890464	0.136693	1.09938	High	P04156	Major prion protein OS=Homo sapiens OX=9606	PRNP			0.788799	0.262449	14.701	5	1	62	1	253	27.6	9										1	1	1	1		-4.55521	-4.75853	-3.95642	-4.47275	-5.02686	-3.36048	-3.51917	-3.32341	-3.62551
	1.89235	0.136528	1.09926	High	P42765	3-ketoacyl-CoA thiolase, mitochondrial OS=Homo sapiens OX=9606	ACAA2			1.76194	0.0923565	161.374	60	16	1046	16	397	41.9	8.09	54	71	59	63	55	69	65	66	72	79	63	79	1		3.89547	3.97141	3.9811	4.09887	4.05248	4.10622	4.16077	4.08033	4.28337
	0.255453	0.136459	1.0992	High	Q8WVE0	EEF1A lysine methyltransferase 1 OS=Homo sapiens OX=9606	EEF1AKMT1			0.219478	0.643557	6.861	16	2	11	2	214	24.5	4.55	1	1				3		2		2		2	1		-2.68178	-3.00205	-2.94024	-2.76556	-3.04977	-2.39937	-2.89201	-2.80473	-3.08542
	0.504969	0.136444	1.09919	High	O14763	Tumor necrosis factor receptor superfamily member 10B OS=Homo sapiens OX=9606	TNFRSF10B			1.00317	0.199487	12.366	7	2	109	2	440	47.8	5.55	7	6	7	6	7	7	8	6	7	8	9	5	1		-1.31318	-1.08435	-1.02068	-0.996694	-0.871099	-1.14108	-0.899906	-0.72778	-0.927208
	0.0629667	0.136426	1.09918	High	Q92574	Hamartin OS=Homo sapiens OX=9606	TSC1			0.240766	0.619442	15.396	3	2	16	2	1164	129.7	6.47	3	1	1	1	1	1	1	2	1	1	1	2	1		-3.48914	-3.03428	-4.76169	-2.92678	-4.70478	-3.24428	-2.9992	-3.04619	-3.29507
	0.444567	0.136192	1.099	High	P54289	Voltage-dependent calcium channel subunit alpha-2/delta-1 OS=Homo sapiens OX=9606	CACNA2D1			0.298829	0.55804	146.733	26	20	632	20	1103	124.5	5.27								1	1			1	1		-1.42878	-1.5998	-1.27556	-1.34563	-1.12004	-1.4299	-1.20876	-0.816863	-1.53256
	1.04368	0.136107	1.09894	High	Q9H4G4	Golgi-associated plant pathogenesis-related protein 1 OS=Homo sapiens OX=9606	GLIPR2			0.741603	0.27655	61.829	56	6	385	6	154	17.2	9.41	11	7	7	6	8	7	10	9	10	8	9	7	1		1.27047	1.2647	1.13525	1.27674	1.4173	1.38469	1.45791	1.40895	1.23188
	1.49575	0.136065	1.0989	High	Q8NBS9	Thioredoxin domain-containing protein 5 OS=Homo sapiens OX=9606	TXNDC5			2.43217	0.0626584	113.955	39	14	1058	14	432	47.6	5.97	56	49	60	63	52	67	57	66	64	64	70	70	1		4.90954	4.85288	4.99381	5.04089	5.07381	5.04972	5.09944	5.12998	5.16329
	0.988002	0.135834	1.09873	High	Q92820	Gamma-glutamyl hydrolase OS=Homo sapiens OX=9606	GGH			0.574129	0.352958	64.377	40	10	503	10	318	35.9	7.11	23	33	32	25	29	33	32	39	35	31	34	39	1		2.4434	2.2379	2.40461	2.47279	2.50165	2.51896	2.3839	2.44174	2.64855
	0.509485	0.135497	1.09847	High	Q9Y333	U6 snRNA-associated Sm-like protein LSm2 OS=Homo sapiens OX=9606	LSM2			1.93446	0.0786703	30.265	68	4	203	4	95	10.8	6.52	16	10	12	10	10	9	10	9	10	10	6	8	1		-0.607171	-0.321013	-0.221166	-0.25611	-0.265921	-0.220827	-0.675133	-0.949752	-1.26026
	1.13623	0.135379	1.09838	High	Q9BZZ5	Apoptosis inhibitor 5 OS=Homo sapiens OX=9606	API5			0.907566	0.217988	96.385	34	12	643	12	524	59	7.34	24	30	27	26	27	17	34	26	30	24	26	28	1		2.75582	2.75412	2.82141	2.8159	2.99159	2.93001	2.90384	2.87648	2.77907
	0.376709	0.135249	1.09828	High	Q9UIQ6	Leucyl-cystinyl aminopeptidase OS=Homo sapiens OX=9606	LNPEP			1.15234	0.170561	58.965	14	10	223	10	1025	117.3	5.73	9	9	12	9	12	10	15	13	12	11	12	15	1		0.419198	0.234193	0.543292	0.360797	0.474707	0.766926	0.676216	0.808427	0.828997
	0.835945	0.135028	1.09811	High	O00291	Huntingtin-interacting protein 1 OS=Homo sapiens OX=9606	HIP1			1.06475	0.187431	179.591	38	26	1034	24	1037	116.1	5.3	25	24	23	24	19	20	26	26	32	28	20	23	1		2.28232	2.24477	2.18926	2.28023	2.51052	2.33069	2.54835	2.55049	2.32671
	0.360158	0.134833	1.09797	High	Q96CU9	FAD-dependent oxidoreductase domain-containing protein 1 OS=Homo sapiens OX=9606	FOXRED1			0.231601	0.629452	15.238	16	4	20	4	486	53.8	7.78	1	2	2	1		1	3	3	1	1	2	2	1		-1.56008	-1.14422	-1.16199	-1.24039	-1.22106	-1.00035	-1.12377	-1.30532	-1.04309
	0.244463	0.134789	1.09793	High	Q6P5R6	60S ribosomal protein L22-like 1 OS=Homo sapiens OX=9606	RPL22L1			0.127274	0.764933	31.29	30	2	150	2	122	14.6	9.38	3	4	3	5	1	2	5	4	6	3	5	4	1		1.20669	1.39564	0.773072	1.23318	1.47311	1.07349	1.13408	1.2894	0.977001
	0.147996	0.134359	1.0976	High	P29374	AT-rich interactive domain-containing protein 4A OS=Homo sapiens OX=9606	ARID4A			2.27423	0.0616889	5.101	2	2	16	2	1257	142.7	5.1								1		1		1	1		-4.54031	-4.71912	-4.23549	-4.93561	-4.27216	-3.88406	-1.99555	-3.0858	-2.86466
	0.410904	0.134291	1.09755	High	Q9P0V3	SH3 domain-binding protein 4 OS=Homo sapiens OX=9606	SH3BP4			0.731495	0.281187	4.292	2	1	10	1	963	107.4	7.71								1		1		2	1		-2.24916	-2.48114	-2.10582	-2.14093	-2.29434	-1.99796	-2.18771	-1.92391	-1.63337
	0.37643	0.133895	1.09725	High	Q8WXE9	Stonin-2 OS=Homo sapiens OX=9606	STON2			1.14241	0.172322	21.301	8	5	81	5	905	101.1	5.39	1	1			1	1	1	1		1	1	2	1		-1.69693	-1.7261	-1.56539	-1.58185	-1.74197	-1.26291	-1.39051	-1.26535	-1.23054
	3.1577	0.13386	1.09723	High	P28288	ATP-binding cassette sub-family D member 3 OS=Homo sapiens OX=9606	ABCD3			2.71338	0.0580594	50.127	17	9	192	9	659	75.4	9.36	15	9	9	12	9	13	7	11	10	11	8	8	1		0.470654	0.513871	0.489745	0.634465	0.612448	0.628937	0.649433	0.732465	0.627214
	1.92059	0.133839	1.09721	High	Q14197	Peptidyl-tRNA hydrolase ICT1, mitochondrial OS=Homo sapiens OX=9606	MRPL58			2.85667	0.0538537	19.029	24	4	177	4	206	23.6	10.07	12	10	13	15	17	12	11	12	12	14	13	13	1		0.218841	0.256045	0.222049	0.309886	0.398748	0.389816	0.390356	0.440007	0.437428
	0.146076	0.133787	1.09717	High	Q14684	Ribosomal RNA processing protein 1 homolog B OS=Homo sapiens OX=9606	RRP1B			0.0391572	0.913276	61.84	26	12	101	12	758	84.4	9.76							1		1	1	1		1		-1.47711	-1.43641	-1.80735	-2.0568	-1.27563	-0.987078	-1.03603	-1.39685	-1.91805
	0.375334	0.13369	1.0971	High	P02788	Lactotransferrin OS=Homo sapiens OX=9606	LTF			0.152238	0.729856	5.879	3	2	23	2	710	78.1	8.12	2		1	1	2	1	4	3	5		1	2	1		-1.89425	-1.64892	-1.71562	-1.87811	-1.514	-1.46561	-1.8998	-1.28216	-1.62939
	0.768326	0.13361	1.09704	High	P46013	Proliferation marker protein Ki-67 OS=Homo sapiens OX=9606	MKI67			1.04339	0.190392	92.398	10	17	283	17	3256	358.5	9.45			1				1	1	15	10			1		0.756848	0.644462	0.893867	0.892697	0.961674	0.841635	1.52513	1.00601	1.00586
	1.01168	0.133586	1.09702	High	Q9Y3B3	Transmembrane emp24 domain-containing protein 7 OS=Homo sapiens OX=9606	TMED7			1.47156	0.123721	61.21	39	8	519	8	224	25.2	6.89	19	21	18	21	20	23	23	22	22	22	23	19	1		1.89289	1.93218	1.99422	1.96462	2.13421	2.12122	2.08064	2.17897	2.26196
	1.97971	0.133547	1.09699	High	Q15008	26S proteasome non-ATPase regulatory subunit 6 OS=Homo sapiens OX=9606	PSMD6			1.64272	0.105151	103.189	45	15	570	15	389	45.5	5.62	36	35	34	34	33	37	40	31	39	36	41	35	1		2.88088	2.83674	2.80385	2.93579	2.99186	2.99448	3.07423	3.00597	2.91876
	0.800287	0.1335	1.09695	High	P35232	Prohibitin 1 OS=Homo sapiens OX=9606	PHB1			1.24507	0.15367	167	78	17	1452	17	272	29.8	5.76	73	88	83	78	77	101	82	82	85	94	96	83	1	Met-loss+Acetyl [N-Term]	5.0545	5.20826	4.98168	5.27642	5.14402	5.22449	5.32069	5.22786	5.31516
	0.221348	0.133383	1.09686	High	Q92633	Lysophosphatidic acid receptor 1 OS=Homo sapiens OX=9606	LPAR1			0.338671	0.518954	4.579	2	1	60	1	364	41.1	8.53	3	2	2		4	4	3	3	1	4	2	2	1		-2.93117	-3.29322	-3.05342	-2.54101	-3.14364	-3.19302	-2.60931	-3.10598	-2.63278
	0.895758	0.133184	1.09671	High	Q9HD20	Endoplasmic reticulum transmembrane helix translocase OS=Homo sapiens OX=9606	ATP13A1			1.26516	0.148633	74.97	22	15	351	15	1204	132.9	8.13	28	19	29	24	21	22	23	30	25	24	20	22	1	Met-loss+Acetyl [N-Term]	1.82352	1.9543	1.88355	1.92589	2.12625	2.00877	2.17877	2.12928	2.00811
	0.313538	0.133169	1.0967	High	Q13247	Serine/arginine-rich splicing factor 6 OS=Homo sapiens OX=9606	SRSF6			0.294537	0.562341	41.426	18	7	914	6	344	39.6	11.43	22	18	20	17	16	17	17	19	20	24	27	18	1		1.14503	0.916646	0.81088	0.864713	1.35517	1.05218	1.17468	1.19265	1.02912
	0.546626	0.133137	1.09668	High	Q15773	Myeloid leukemia factor 2 OS=Homo sapiens OX=9606	MLF2			0.586983	0.344411	3.718	5	1	21	1	248	28.1	6.9	1	3	2	2		2	2	1	1	1	1	2	1		-2.88876	-2.82301	-2.71194	-2.75431	-2.48644	-2.78355	-2.70002	-2.54341	-2.67312
	0.958989	0.132921	1.09651	High	P52272	Heterogeneous nuclear ribonucleoprotein M OS=Homo sapiens OX=9606	HNRNPM			0.77232	0.267865	330.468	52	32	3322	32	730	77.5	8.7	142	151	147	156	150	178	172	179	182	189	157	180	1		5.80822	5.71301	5.72901	5.76966	5.95968	5.91965	5.95668	5.98233	5.77218
	1.86656	0.132642	1.0963	High	P23284	Peptidyl-prolyl cis-trans isomerase B OS=Homo sapiens OX=9606	PPIB			2.1292	0.06768	156.534	57	15	3886	15	216	23.7	9.41	181	155	174	153	195	176	194	196	194	192	212	200	1		6.14939	6.21978	6.25566	6.34216	6.34776	6.33284	6.45671	6.33112	6.41551
	0.393265	0.132606	1.09627	High	P43243	Matrin-3 OS=Homo sapiens OX=9606	MATR3			0.16561	0.711673	236.949	43	26	1004	26	847	94.6	6.25	24	26	15	18	24	17	34	24	32	37	40	21	1		2.85916	2.75884	2.67607	2.66607	3.12378	2.90204	2.98999	3.17934	2.58459
	0.678992	0.132563	1.09624	High	Q7Z417	FMR1-interacting protein NUFIP2 OS=Homo sapiens OX=9606	NUFIP2			0.713291	0.289034	113.762	33	14	381	14	695	76.1	8.7	13	5	7	7	9	6	8	12	9	6	9	5	1		1.36408	1.12694	1.37167	1.37632	1.49502	1.38904	1.42855	1.4355	1.3956
	1.45066	0.132385	1.0961	High	P62241	40S ribosomal protein S8 OS=Homo sapiens OX=9606	RPS8			1.77951	0.091157	123.364	58	13	2333	13	208	24.2	10.32	48	63	55	60	53	54	75	73	63	72	76	72	1		4.06003	3.98275	3.97561	4.09842	4.20322	4.1139	4.28343	4.32585	4.13727
	0.243799	0.132318	1.09605	High	Q9BTD8	RNA-binding protein 42 OS=Homo sapiens OX=9606	RBM42			0.113816	0.784065	22.693	16	3	59	3	480	50.4	9.63	2		2	1			1	1		1	1		1	Met-loss+Acetyl [N-Term]	-2.79709	-3.10628	-2.68858	-2.95744	-2.84817	-2.38938	-2.82056	-2.88334	-2.53889
	0.508198	0.131908	1.09574	High	O43172	U4/U6 small nuclear ribonucleoprotein Prp4 OS=Homo sapiens OX=9606	PRPF4			0.665935	0.306627	76.593	41	15	239	15	522	58.4	7.42	3	3	7	5	7	1	10	9	10	7	9	7	1		1.8919	1.73319	1.6686	1.80887	2.08093	1.79961	1.94358	2.05103	1.89089
	0.487611	0.131726	1.0956	High	Q13510	Acid ceramidase OS=Homo sapiens OX=9606	ASAH1			1.53666	0.115923	15.619	11	3	196	3	395	44.6	7.62	9	11	11	11	11	14	14	9	11	12	9	13	1		-0.296523	-0.407331	-0.108954	-0.136744	-0.277328	-0.00355721	0.0955009	0.0593405	0.0849285
	0.394816	0.131701	1.09558	High	Q8WVB6	Chromosome transmission fidelity protein 18 homolog OS=Homo sapiens OX=9606	CHTF18			0.19688	0.672633	14.873	6	3	10	3	975	107.3	7.21				1	2	1	1	1		3			1		-3.92771	-3.47552	-3.61367	-3.56863	-3.4539	-3.59927	-3.72043	-3.60983	-3.41492
	1.10931	0.131579	1.09549	High	Q15125	3-beta-hydroxysteroid-Delta(8),Delta(7)-isomerase OS=Homo sapiens OX=9606	EBP	+	Cluster -67	3.5255	0.0361429	11.252	7	1	50	1	230	26.3	7.9	5	3	2	1	2	1	4	4	5	5	4	4	1	Met-loss+Acetyl [N-Term]	0.0562105	0.0865812	0.167089	0.324161	0.181787	0.198669	0.585709	0.500033	0.575323
	0.222027	0.131465	1.09541	High	Q16186	Proteasomal ubiquitin receptor ADRM1 OS=Homo sapiens OX=9606	ADRM1			0.11388	0.784172	17.15	9	2	204	2	407	42.1	5.07	2	3	6	3	5	4	6	7	5	6	4	4	1		-1.00987	-1.33987	-1.10459	-1.23852	-1.21962	-0.601797	-1.11536	-0.995297	-1.01055
	0.849362	0.130762	1.09487	High	Q9BXK5	Bcl-2-like protein 13 OS=Homo sapiens OX=9606	BCL2L13			0.24793	0.611414	17.409	13	4	104	4	485	52.7	4.44	4	8	7	11	4	7	8	7	7	4	7	5	1		-1.10305	-1.09773	-0.997823	-1.0296	-0.960312	-0.816404	-1.0756	-1.09528	-0.153292
	0.358652	0.130563	1.09472	High	O95466	Formin-like protein 1 OS=Homo sapiens OX=9606	FMNL1			0.0874404	0.824081	4.172	2	1	31	1	1100	121.8	5.72	1	3	2	5	2	3	4	3	2	1	3	2	1		-4.92921	-4.85874	-5.04048	-5.00372	-4.89851	-4.53452	-4.6762	-4.54729	-5.26724
	1.1531	0.130346	1.09456	High	Q9UHQ9	NADH-cytochrome b5 reductase 1 OS=Homo sapiens OX=9606	CYB5R1			1.19449	0.161466	87.768	45	11	884	11	305	34.1	9.38	46	65	55	55	49	59	51	60	52	67	69	57	1		3.2107	3.25526	3.36158	3.3489	3.4374	3.43228	3.43539	3.35417	3.49756
	1.39802	0.130337	1.09455	High	Q9Y305	Acyl-coenzyme A thioesterase 9, mitochondrial OS=Homo sapiens OX=9606	ACOT9			1.01903	0.196591	73.518	33	13	477	13	439	49.9	8.6	30	35	35	37	33	30	32	27	35	30	26	33	1		2.32702	2.36679	2.45259	2.47399	2.55265	2.51076	2.60511	2.41521	2.53016
	0.59465	0.130017	1.09431	High	Q8IXI1	Mitochondrial Rho GTPase 2 OS=Homo sapiens OX=9606	RHOT2			1.40145	0.128279	31.636	17	7	314	7	618	68.1	5.86	23	17	17	17	17	13	13	15	9	19	12	16	1		1.0298	0.943614	1.12994	1.18178	1.01527	1.29635	1.33031	1.25642	1.42767
	0.076364	0.129892	1.09421	High	O95365	Zinc finger and BTB domain-containing protein 7A OS=Homo sapiens OX=9606	ZBTB7A			0.308857	0.549435	24.161	9	3	36	3	584	61.4	5.19													1		-5.69932	-5.83381	-4.38181	-5.86828	-5.09278	-4.56421	-5.09298	-4.38412	-4.57064
	0.840961	0.129654	1.09403	High	Q13423	NAD(P) transhydrogenase, mitochondrial OS=Homo sapiens OX=9606	NNT			1.8614	0.0859698	147.06	22	17	922	17	1086	113.8	8.09	64	51	48	58	60	61	68	73	69	68	54	72	1		3.26951	3.25505	3.38371	3.46204	3.31893	3.51626	3.60701	3.52106	3.59866
	0.928188	0.129278	1.09375	High	Q8WW59	SPRY domain-containing protein 4 OS=Homo sapiens OX=9606	SPRYD4			0.677981	0.301875	13.808	20	3	83	3	207	23.1	6.93	4	2	2	4	8	4	9	4	3	7	3	6	1		-0.440267	-0.448802	-0.344605	-0.23252	-0.393448	-0.219873	-0.220222	-0.406121	-0.182671
	0.631906	0.12852	1.09317	High	Q9BQ48	39S ribosomal protein L34, mitochondrial OS=Homo sapiens OX=9606	MRPL34			0.353587	0.506064	6.355	13	1	127	1	92	10.2	12.25	3	6	4	5	4	6	8	10	4	9	2	6	1		-0.00120831	-0.0612135	0.0598612	0.0595751	0.0273705	0.296055	0.0989189	-0.048974	0.201817
	0.96188	0.128436	1.09311	High	Q7Z4R8	UPF0669 protein C6orf120 OS=Homo sapiens OX=9606	C6orf120			2.13922	0.0670882	20.63	25	2	57	2	191	20.8	4.84	1	2	1	3	2	2	3	3	3	2	2	3	1		-0.785333	-0.922584	-0.841374	-0.72211	-0.804396	-0.637478	-0.553257	-0.625089	-0.530613
	0.604569	0.128404	1.09308	High	Q99683	Mitogen-activated protein kinase kinase kinase 5 OS=Homo sapiens OX=9606	MAP3K5			0.670671	0.304736	11.171	3	3	29	3	1374	154.4	5.78	1	3	3	3	2	2	2	4	2	2	4		1		-2.07896	-2.12441	-2.27925	-1.88615	-2.0964	-2.11486	-2.08315	-1.785	-1.9828
	0.284452	0.128349	1.09304	High	Q6YP21	Kynurenine--oxoglutarate transaminase 3 OS=Homo sapiens OX=9606	KYAT3			0.239275	0.620926	27.456	13	4	128	4	454	51.4	8.19	10	10	11	6	8	12	11	11	12	9	11	16	1		1.07293	0.832644	0.604442	1.11433	0.723906	1.05683	1.03912	0.87345	1.09506
	0.550878	0.128206	1.09293	High	Q96CW1	AP-2 complex subunit mu OS=Homo sapiens OX=9606	AP2M1			0.649696	0.313092	95.159	35	12	440	12	435	49.6	9.54	22	19	15	22	20	13	19	19	21	17	12	15	1		1.77815	1.92907	2.06926	1.96124	2.16498	2.03488	2.13153	2.11322	2.02768
	0.702143	0.128089	1.09284	High	P08758	Annexin A5 OS=Homo sapiens OX=9606	ANXA5			1.28942	0.144614	368.218	81	28	6443	28	320	35.9	5.05	218	219	215	197	216	212	268	271	277	235	289	267	1	Met-loss+Acetyl [N-Term]	7.59405	7.3862	7.40319	7.50847	7.6802	7.57904	7.85781	7.65217	7.68874
	1.03081	0.128038	1.09281	High	Q7Z4H8	Protein O-glucosyltransferase 3 OS=Homo sapiens OX=9606	POGLUT3			1.20319	0.161008	157.987	49	18	760	18	507	58.5	8.24	44	46	39	36	42	51	40	45	53	50	43	61	1		2.81796	2.74834	2.90495	2.92864	2.90297	3.02376	2.96173	2.95621	3.11029
	0.775541	0.127966	1.09275	High	P14854	Cytochrome c oxidase subunit 6B1 OS=Homo sapiens OX=9606	COX6B1			2.48387	0.0618919	33.288	58	4	484	4	86	10.2	7.05	16	21	13	15	10	19	19	23	21	23	16	20	1		2.27337	2.28653	2.08337	2.28595	2.32554	2.41567	2.60859	2.54586	2.59853
	0.439732	0.127633	1.0925	High	Q9Y6M1	Insulin-like growth factor 2 mRNA-binding protein 2 OS=Homo sapiens OX=9606	IGF2BP2			0.580809	0.348886	107.476	34	16	671	14	599	66.1	8.46	10	15	13	13	11	12	12	14	13	10	13	17	1		2.9284	2.68829	3.09922	3.01861	2.97888	3.10132	3.14297	3.00439	3.16402
	0.25986	0.127345	1.09228	High	O00203	AP-3 complex subunit beta-1 OS=Homo sapiens OX=9606	AP3B1			0.562136	0.359068	115.371	29	24	964	24	1094	121.2	6.04	57	60	55	67	53	50	56	64	51	56	65	60	1		4.482	4.12196	4.07643	4.10024	4.60985	4.35234	4.73527	4.62382	4.32628
	0.351736	0.127194	1.09217	High	Q86W50	RNA N6-adenosine-methyltransferase METTL16 OS=Homo sapiens OX=9606	METTL16			0.132677	0.757355	12.783	9	3	22	3	562	63.6	7.85	1	2	1	1	3	1			1	1			1		-1.32684	-1.50283	-1.57286	-1.26944	-1.59458	-1.15693	-1.38206	-1.60298	-1.05527
	0.203574	0.127123	1.09211	High	Q6SPF0	Sterile alpha motif domain-containing protein 1 OS=Homo sapiens OX=9606	SAMD1			0.968421	0.205447	6.336	4	2	16	2	538	56	7.58													1		-5.12214	-5.5406	-5.23532	-4.81962	-5.16371	-5.53337	-4.98292	-4.75111	-4.3787
	1.73863	0.127111	1.0921	High	Q5T9L3	Protein wntless homolog OS=Homo sapiens OX=9606	WLS			1.60107	0.109076	9.567	6	3	60	3	541	62.2	7.36	5	4	3	2	3	3	4	2	4	5	2	6	1		-1.14586	-1.16279	-1.07438	-1.03786	-0.986368	-0.977465	-0.982288	-0.942319	-0.765114
	0.748798	0.127005	1.09202	High	Q9NZ08	Endoplasmic reticulum aminopeptidase 1 OS=Homo sapiens OX=9606	ERAP1			0.688067	0.297786	80.107	20	14	292	14	941	107.2	6.46	23	22	23	21	25	26	16	13	22	26	14	16	1		1.45911	1.32085	1.44235	1.49687	1.44622	1.66023	1.54642	1.46506	1.67279
	3.8177	0.126343	1.09152	High	Q96A65	Exocyst complex component 4 OS=Homo sapiens OX=9606	EXOC4			1.56859	0.11147	34.993	12	8	97	8	974	110.4	6.49	11	6	10	8	7	6	4	6	8	6	5	10	1		-0.2872	-0.294303	-0.302953	-0.153756	-0.180367	-0.171305	-0.159918	-0.272204	-0.127687
	2.42425	0.126252	1.09145	High	Q9BWM7	Sideroflexin-3 OS=Homo sapiens OX=9606	SFXN3			2.69142	0.0558899	65.385	47	12	707	10	321	35.5	9.1	38	40	33	45	32	38	41	36	43	48	38	50	1		1.72566	1.78647	1.78984	1.89492	1.89285	1.89296	2.09652	1.94461	2.02634
	0.365826	0.126127	1.09136	High	P11388	DNA topoisomerase 2-alpha OS=Homo sapiens OX=9606	TOP2A			0.442449	0.430984	74.112	13	13	201	12	1531	174.3	8.72	1	2		1		2	3	2		1	1		1		-1.84233	-1.54619	-1.69044	-1.79489	-1.48927	-1.41642	-1.67478	-1.39508	-1.32731
	0.431263	0.125736	1.09106	High	Q9P2E3	NFX1-type zinc finger-containing protein 1 OS=Homo sapiens OX=9606	ZNFX1			1.39306	0.128846	29.85	5	5	56	5	1918	220.1	7.3	7	3	5	3	3	3	2	3	5	3	4	3	1		-2.53874	-2.59179	-2.30186	-2.51573	-2.21805	-2.3214	-3.06226	-2.5693	-3.11859
	0.118112	0.125714	1.09105	High	Q5JTD0	Tight junction-associated protein 1 OS=Homo sapiens OX=9606	TJAP1			0.0655438	0.86237	6.721	7	2	8	2	557	61.8	5.97	1	1		3	1	1						1	1		-2.0438	-2.45238	-3.26469	-2.17365	-2.6524	-2.55767	-2.58753	-2.26952	-3.15889
	0.642668	0.125642	1.09099	High	Q96ER9	Mitochondrial potassium channel OS=Homo sapiens OX=9606	CCDC51			0.471673	0.411668	10.91	8	3	42	3	411	45.8	8.19	3	2	4	5	4	3	3	5	1	4	3	2	1		-0.921676	-0.936326	-0.684878	-0.662938	-0.780437	-0.722578	-0.83231	-0.724666	-0.590458
	0.814673	0.125611	1.09097	High	Q32P28	Prolyl 3-hydroxylase 1 OS=Homo sapiens OX=9606	P3H1			1.03304	0.192494	155.245	39	18	776	18	736	83.3	5.14	31	36	28	37	39	34	30	39	31	33	31	38	1		2.92314	2.84634	3.06349	3.06995	3.01374	3.12611	3.06845	3.15203	3.08567
	0.795173	0.125422	1.09083	High	Q9NP58	ATP-binding cassette sub-family B member 6 OS=Homo sapiens OX=9606	ABCB6			0.909831	0.2179	50.042	17	9	249	9	842	93.8	8.48	9	8	8	16	13	10	12	15	8	10	12	8	1		0.345685	0.460429	0.310887	0.587689	0.513893	0.391684	0.566406	0.514895	0.469109
	1.58512	0.12539	1.0908	High	P62736	Actin, aortic smooth muscle OS=Homo sapiens OX=9606	ACTA2			2.69968	0.0558113	557.13	89	33	17025	5	377	42	5.39	775	780	743	823	713	745	806	783	719	675	839	734	1		4.65278	4.66195	4.69592	4.81423	4.7299	4.8427	4.92218	4.91496	4.85033
	0.484205	0.125341	1.09077	High	Q9NRP2	COX assembly mitochondrial protein 2 homolog OS=Homo sapiens OX=9606	CMC2			0.447846	0.426365	3.837	13	1	43	1	79	9.5	7.87	5	6	5	3	3	3	2	4	2	2	4	4	1		-2.11907	-1.96787	-2.28357	-2.0803	-2.04671	-1.86748	-2.12388	-1.90624	-1.73255
	2.08974	0.124622	1.09022	High	P24844	Myosin regulatory light polypeptide 9 OS=Homo sapiens OX=9606	MYL9			1.89991	0.0830638	130.443	62	9	1838	3	172	19.8	4.92	67	82	97	81	95	93	110	105	116	114	106	114	1		1.24916	1.20728	1.22784	1.3877	1.35965	1.3108	1.29113	1.38826	1.34482
	2.40356	0.124454	1.0901	High	Q9NWM8	Peptidyl-prolyl cis-trans isomerase FKBP14 OS=Homo sapiens OX=9606	FKBP14			1.97157	0.0756532	18.424	27	4	123	4	211	24.2	6.07	8	8	8	5	8	10	5	9	5	9	9	9	1		-0.246654	-0.194545	-0.230729	-0.0923109	-0.0796604	-0.126593	-0.0886955	-0.122401	0.00614548
	0.438782	0.12389	1.08967	High	Q3SY69	Mitochondrial 10-formyltetrahydrofolate dehydrogenase OS=Homo sapiens OX=9606	ALDH1L2			0.345221	0.513782	52.132	15	8	253	8	923	101.7	6.52	19	20	16	20	24	21	19	18	26	12	18	22	1		0.313657	0.292256	0.0184126	0.39326	0.182739	0.419996	0.365261	0.245202	0.375225
	0.0815954	0.123817	1.08961	High	Q9BZK7	F-box-like/WD repeat-containing protein TBL1XR1 OS=Homo sapiens OX=9606	TBL1XR1			0.111667	0.787365	20.032	8	2	47	2	514	55.6	5.55	3	5	3	1	3	2	3	3	1	3	1	3	1		-1.22159	-1.62764	-2.90453	-2.10289	-1.78036	-1.49907	-2.39438	-2.82955	-1.36668
	1.17429	0.123808	1.08961	High	Q5BJH7	Protein YIF1B OS=Homo sapiens OX=9606	YIF1B			1.39262	0.128559	52.895	25	5	114	5	314	34.4	9.16	11	10	10	10	5	8	7	6	6	6	8	9	1	Acetyl [N-Term]	0.509109	0.463552	0.500052	0.639802	0.522678	0.681656	0.637859	0.640111	0.80378
	0.528324	0.123693	1.08952	High	Q9H9Q2	COP9 signalosome complex subunit 7b OS=Homo sapiens OX=9606	COPS7B			0.45264	0.423345	16.466	14	2	37	2	264	29.6	6.15	1	1	6	5	3	2	3	2	2	2	2	2	1	Met-loss+Acetyl [N-Term]	-2.44763	-2.16496	-2.16486	-2.07037	-2.12284	-2.21316	-2.27555	-2.32972	-2.17992
	0.0868796	0.123609	1.08946	High	Q9H6F5	Coiled-coil domain-containing protein 86 OS=Homo sapiens OX=9606	CCDC86			0.65156	0.312453	18.177	13	3	19	3	360	40.2	10.33													1		-4.70325	-4.84878	-4.84782	-5.43682	-3.72651	-4.86569	-5.60335	-5.16337	-5.63121
	1.34339	0.123585	1.08944	High	Q8TCS8	Polyribonucleotide nucleotidyltransferase 1, mitochondrial OS=Homo sapiens OX=9606	PNPT1			1.04213	0.190519	63.401	22	14	308	14	783	85.9	7.77	16	23	21	23	20	26	26	23	16	23	18	29	1		1.54809	1.50284	1.60256	1.68259	1.61593	1.72573	1.71504	1.6068	1.83389
	0.802214	0.123328	1.08924	High	Q92542	Nicastrin OS=Homo sapiens OX=9606	NCSTN			1.37732	0.130438	70.141	17	9	541	9	709	78.4	5.99	21	25	26	21	26	34	21	28	31	30	22	28	1		2.323	2.31042	2.48248	2.54853	2.40683	2.53053	2.5977	2.5547	2.55361
	0.110934	0.123229	1.08917	High	O94929	Actin-binding LIM protein 3 OS=Homo sapiens OX=9606	ABLIM3			0.0807713	0.836023	35.434	16	7	64	7	683	77.8	8.54	1	2	2	2	2	3	2	2	2	2	2	1	1		-1.80707	-2.21793	-1.4814	-2.38599	-1.46779	-1.28293	-1.59213	-1.49698	-1.79626
	0.290238	0.123059	1.08904	High	P59768	Guanine nucleotide-binding protein G(I)/G(S)/G(O) subunit gamma-2 OS=Homo sapiens OX=9606	GNG2			0.45318	0.423006	7.817	41	2	33	2	71	7.8	7.99													1	Met-loss+Acetyl [N-Term]	-4.14804	-4.00017	-4.36536	-3.77906	-4.19439	-4.17093	-3.78146	-4.09031	-3.89186
	1.40071	0.122623	1.08871	High	P04062	Lysosomal acid glucosylceramidase OS=Homo sapiens OX=9606	GBA1			1.48506	0.12214	124.997	35	13	629	13	536	59.7	7.61	33	23	30	33	42	31	33	42	34	27	34	39	1		2.72611	2.71661	2.67498	2.80529	2.9022	2.77808	2.79129	2.83521	2.89882
	0.334083	0.122557	1.08866	High	Q14554	Protein disulfide-isomerase A5 OS=Homo sapiens OX=9606	PDIA5			0.2718	0.587066	20.837	11	5	70	5	519	59.6	7.91	5	3	6	7	7	9	6	4	5	8	4	6	1		-0.201308	-0.253665	0.167888	-0.0413427	0.172287	-0.0503597	-0.0628433	0.130288	0.0802212
	0.663789	0.122506	1.08862	High	P08572	Collagen alpha-2(IV) chain OS=Homo sapiens OX=9606	COL4A2			0.643542	0.315666	6.877	1	2	35	2	1712	167.4	8.66	5	4	5	3	3	2	3	2	3	1	1	2	1		-2.14753	-1.96071	-2.1963	-1.95504	-2.06236	-1.91962	-1.9692	-2.02663	-1.75661
	0.738416	0.121951	1.08821	High	Q99627	COP9 signalosome complex subunit 8 OS=Homo sapiens OX=9606	COPS8			0.683491	0.299739	43.442	35	4	321	4	209	23.2	5.38	21	21	23	24	21	20	22	21	17	17	20	25	1		1.72608	1.905	1.72256	1.83641	1.9929	1.89018	1.80731	1.71962	1.83737
	0.277801	0.121949	1.0882	High	Q9H3M7	Thioredoxin-interacting protein OS=Homo sapiens OX=9606	TXNIP			0.0853552	0.827905	23.291	17	5	161	5	391	43.6	7.5	7	3	5	7	6	5	7	8	3	3	7	1	1		-1.61961	-1.65265	-1.29275	-1.602	-1.45065	-1.14651	-1.29783	-1.83561	-1.34947
	0.249427	0.121851	1.08813	High	Q99570	Phosphoinositide 3-kinase regulatory subunit 4 OS=Homo sapiens OX=9606	PIK3R4			0.118249	0.776895	22.804	4	4	17	4	1358	153	7.17	2	1	2	3	1	1			1		2	1	1		-2.20856	-2.0691	-2.63662	-2.10574	-2.36438	-2.0786	-2.13004	-2.23474	-2.31214
	0.569565	0.12166	1.08799	High	Q13610	Periodic tryptophan protein 1 homolog OS=Homo sapiens OX=9606	PWP1			0.356039	0.504854	36.689	24	7	194	7	501	55.8	4.77	8	9	9	6	11	8	9	8	12	9	7	7	1		-0.0843687	-0.306251	-0.303069	-0.185292	0.00941467	-0.15283	0.0893936	-0.0903139	-0.25967
	0.878644	0.121524	1.08788	High	Q6YN16	Hydroxysteroid dehydrogenase-like protein 2 OS=Homo sapiens OX=9606	HSDL2			1.81092	0.0887739	98.784	41	11	470	11	418	45.4	7.99	34	41	36	38	35	36	32	37	36	35	29	34	1		2.24194	2.29431	2.26483	2.41932	2.26807	2.47827	2.51491	2.46369	2.51763
	0.674322	0.121291	1.08771	High	P23396	40S ribosomal protein S3 OS=Homo sapiens OX=9606	RPS3			1.15838	0.168101	208.142	70	20	5409	20	243	26.7	9.66	155	144	157	151	142	151	167	161	173	161	179	157	1		5.13147	4.97615	5.2197	5.15603	5.29322	5.24194	5.33034	5.36518	5.25795
	1.30081	0.120908	1.08742	High	P08123	Collagen alpha-2(I) chain OS=Homo sapiens OX=9606	COL1A2			1.12762	0.17569	213.347	38	26	908	26	1366	129.2	8.95	24	21	29	26	34	27	28	35	24	22	25	31	1		1.97932	1.97311	2.08695	2.1187	2.17936	2.10405	2.0584	2.21288	2.19175
	0.30813	0.120906	1.08742	High	Q5T9A4	ATPase family AAA domain-containing protein 3B OS=Homo sapiens OX=9606	ATAD3B			0.169594	0.707178	46.841	16	10	971	3	648	72.5	9.2	30	35	37	38	46	42	42	37	40	27	42	40	1		0.236329	0.50632	0.403375	0.281747	0.760267	0.466728	0.471825	0.478169	0.39282
	0.112591	0.120843	1.08737	High	Q9Y6E0	Serine/threonine-protein kinase 24 OS=Homo sapiens OX=9606	STK24			0.392609	0.471349	13.219	9	3	25	3	443	49.3	5.69	1	1	1		1	2	1	4	1		3	2	1		-1.49296	-1.68439	-2.72373	-1.84791	-1.72062	-1.97002	-2.52338	-1.83935	-2.81955
	0.909477	0.120746	1.0873	High	O60568	Multifunctional procollagen lysine hydroxylase and glycosyltransferase LH3 OS=Homo sapiens OX=9606	PLOD3			0.826085	0.246666	195.791	51	25	1737	25	738	84.7	6.05	76	88	73	88	93	92	79	92	73	80	84	92	1		4.00787	3.95439	4.01441	4.19119	3.99739	4.15032	4.08548	4.08309	4.25464
	0.807694	0.120058	1.08678	High	Q9H6U8	Alpha-1,2-mannosyltransferase ALG9 OS=Homo sapiens OX=9606	ALG9			0.458668	0.419887	16.457	9	3	86	3	611	69.8	8.68	4	5	2	5	8	4	5	8	7	6	5	8	1		-1.847	-1.88396	-1.7899	-1.81863	-1.7394	-1.60266	-1.65576	-1.8777	-1.4838
	0.830608	0.119928	1.08668	High	Q6NVY1	3-hydroxyisobutyryl-CoA hydrolase, mitochondrial OS=Homo sapiens OX=9606	HIBCH			1.41857	0.127507	33.195	17	5	168	5	386	43.5	8.19	10	12	16	13	10	12	13	16	16	15	14	17	1		-0.291749	-0.357236	-0.209617	-0.0802469	-0.258516	-0.160055	-0.0487289	-0.142095	0.0175285
	0.306966	0.119909	1.08667	High	Q9NZ45	CDGSH iron-sulfur domain-containing protein 1 OS=Homo sapiens OX=9606	CISD1			0.71694	0.287625	10.403	14	1	17	1	108	12.2	9.09	2		2	1	2	2	1	1	2	2	1	1	1		-3.16363	-3.01306	-2.95959	-2.81975	-2.74083	-3.21597	-2.68211	-2.89785	-2.65332
	0.636247	0.119865	1.08663	High	P63167	Dynein light chain 1, cytoplasmic OS=Homo sapiens OX=9606	DYNLL1			1.18005	0.163362	57.598	70	4	223	1	89	10.4	7.4	8	6	7	4	16	11	9	10	14	11	17	10	1		0.306314	0.43682	0.552138	0.640937	0.53021	0.483721	0.732433	0.564538	0.760059
	0.872678	0.119803	1.08659	High	Q8IVF2	Protein AHNAK2 OS=Homo sapiens OX=9606	AHNAK2			1.08317	0.183763	751.355	39	103	2609	102	5795	616.2	5.36	16	19	13	16	9	15	20	21	25	27	18	17	1		4.86623	4.71073	4.73857	4.80874	4.94788	4.91831	5.01132	4.97791	4.85686
	0.793473	0.119746	1.08654	High	Q9NRP0	Oligosaccharyltransferase complex subunit OSTC OS=Homo sapiens OX=9606	OSTC			2.26216	0.0625614	14.051	8	1	225	1	149	16.8	9.13	8	5	7	7	5	7	7	10	7	8	11	10	1		0.268399	0.24524	0.115548	0.361131	0.397511	0.229784	0.569044	0.48486	0.523766
	0.134021	0.119694	1.0865	High	Q9P260	RAB11-binding protein RELCH OS=Homo sapiens OX=9606	RELCH			0.360552	0.500307	10.6	2	2	38	2	1216	134.5	5.45	1		1	2	2	1	2	2				2	1		-0.990497	-1.00092	-0.374917	-0.831618	-0.167591	-1.00804	0.412857	-0.820512	-0.380375
	0.565861	0.119645	1.08647	High	P17612	cAMP-dependent protein kinase catalytic subunit alpha OS=Homo sapiens OX=9606	PRKACA			0.779077	0.26707	77.943	41	10	352	5	351	40.6	8.79	22	22	23	19	20	26	19	21	20	21	21	23	1		1.09568	1.00824	0.918698	1.28405	1.0623	1.03521	1.12614	1.1792	1.25931
	0.407025	0.119565	1.08641	High	Q712K3	Ubiquitin-conjugating enzyme E2 R2 OS=Homo sapiens OX=9606	UBE2R2			0.226744	0.634919	23.853	23	3	39	3	238	27.1	4.42	4	1	3	2	3	4	4	3	3	4	2	3	1		2.7082	2.51598	2.9365	2.79426	2.88957	2.83554	2.83402	2.63371	2.81087
	0.636024	0.119473	1.08634	High	Q9Y6N7	Roundabout homolog 1 OS=Homo sapiens OX=9606	ROBO1			1.64391	0.105289	6.755	2	2	7	2	1651	180.8	6.04	1	1		1	3							1	1		-1.92391	-2.15354	-2.19364	-1.96864	-1.99037	-1.95366	-1.85983	-1.80154	-1.72751
	0.459342	0.119418	1.0863	High	Q5T9S5	Coiled-coil domain-containing protein 18 OS=Homo sapiens OX=9606	CCDC18			0.54507	0.366888	3.849	1	1	32	1	1454	168.9	5.66			1						2				1		1.38305	1.18738	1.5205	1.46475	1.3947	1.58973	1.62381	1.38188	1.79656
	1.77711	0.119375	1.08626	High	Q14573	Inositol 1,4,5-trisphosphate receptor type 3 OS=Homo sapiens OX=9606	ITPR3			1.73631	0.094475	111.309	12	21	453	19	2671	303.9	6.48	15	12	17	13	24	17	14	22	23	16	14	22	1		1.08664	1.05777	1.03764	1.19846	1.12763	1.21408	1.38661	1.17353	1.32436
	1.13397	0.119243	1.08616	High	Q6P1X6	UPF0598 protein C8orf82 OS=Homo sapiens OX=9606	C8orf82			0.371123	0.49122	28.565	31	4	63	4	216	23.9	9.14	3	3	5	4	5	4	7	8	8	4	4	8	1		-1.49057	-1.38718	-1.55138	-1.36625	-1.37213	-1.33301	-1.80884	-1.41768	-1.35112
	0.422864	0.119132	1.08608	High	Q58FG1	Putative heat shock protein HSP 90-alpha A4 OS=Homo sapiens OX=9606	HSP90AA4P			0.426512	0.445157	37.089	8	3	1994	1	418	47.7	5.19	81	102	98	125	91	138	116	124	99	114	116	129	1	Acetyl [N-Term]	-0.720908	-0.95176	-0.927163	-0.701552	-0.610191	-0.930693	-0.764647	-0.541194	-0.774706
	1.06173	0.118705	1.08576	High	P27144	Adenylate kinase 4, mitochondrial OS=Homo sapiens OX=9606	AK4			1.61597	0.107585	61.065	53	8	298	8	223	25.3	8.4	26	31	24	26	22	22	20	28	18	24	20	20	1		2.1428	2.29636	2.27749	2.34102	2.33327	2.39847	2.54888	2.37357	2.59226
	1.81311	0.118631	1.0857	High	P30101	Protein disulfide-isomerase A3 OS=Homo sapiens OX=9606	PDIA3			1.33716	0.138225	363.312	61	28	4413	27	505	56.7	6.35	198	226	230	241	217	237	231	241	243	241	251	240	1		6.98118	6.99318	7.00591	7.16853	7.08817	7.07946	7.16243	7.0413	7.20528
	0.159819	0.118291	1.08545	High	Q6P587	Acylpyruvase FAHD1, mitochondrial OS=Homo sapiens OX=9606	FAHD1			0.910721	0.217865	18.308	21	2	23	2	224	24.8	7.39	1	2	1		2	3		3	1	3	1	2	1		-3.24806	-3.31864	-3.81661	-3.07153	-3.7617	-3.19521	-2.51605	-3.15798	-2.81345
	0.434829	0.117809	1.08509	High	Q9HCM4	Band 4.1-like protein 5 OS=Homo sapiens OX=9606	EPB41L5			0.294002	0.562587	6.865	3	2	13	2	733	81.8	6.58	1	1	1		1	1		1	1	1		1	1		-4.03174	-3.96065	-3.70327	-3.68975	-3.892	-3.76048	-3.55665	-3.88844	-3.81417
	1.17662	0.117442	1.08481	High	O94925	Glutaminase kidney isoform, mitochondrial OS=Homo sapiens OX=9606	GLS			2.17619	0.066186	173.518	40	16	969	16	669	73.4	7.77	58	60	64	66	60	56	64	74	68	67	64	65	1		3.59963	3.63902	3.6365	3.81654	3.66065	3.75029	3.80164	3.83635	3.86943
	2.24958	0.116981	1.08446	High	Q9NSE4	Isoleucine--tRNA ligase, mitochondrial OS=Homo sapiens OX=9606	IARS2			2.66631	0.0543304	185.084	39	29	1232	29	1012	113.7	7.2	89	88	87	86	81	90	80	87	87	81	76	84	1		3.44827	3.4497	3.49419	3.58906	3.55115	3.60288	3.6341	3.57799	3.65569
	0.475919	0.116779	1.08431	High	Q96HS1	Serine/threonine-protein phosphatase PGAM5, mitochondrial OS=Homo sapiens OX=9606	PGAM5			0.628407	0.323439	33.23	35	7	211	7	289	32	8.68	2	3	3	2	8	5	5	4	9	11	5	9	1		0.975038	0.835692	1.13781	1.01635	1.21829	1.06423	1.21126	1.15031	1.10079
	0.542027	0.116621	1.08419	High	O94763	Unconventional prefoldin RPB5 interactor 1 OS=Homo sapiens OX=9606	URI1			2.34537	0.059596	13.055	7	2	35	2	535	59.8	5.05	1	2	3	2	1	2	2	2	3	2	2	1	1		-2.66859	-2.75823	-2.57405	-2.52793	-2.69658	-2.4265	-2.99335	-2.93317	-3.08505
	1.42202	0.116446	1.08406	High	Q9NZ01	Very-long-chain enoyl-CoA reductase OS=Homo sapiens OX=9606	TECR			1.50729	0.119249	66.752	31	10	651	10	308	36	9.45	28	32	30	36	28	35	39	37	37	32	34	35	1		3.52619	3.50843	3.60199	3.69058	3.61196	3.68341	3.72766	3.65258	3.83884
	2.25874	0.116348	1.08399	High	P07237	Protein disulfide-isomerase OS=Homo sapiens OX=9606	P4HB	+	Cluster -67	3.01543	0.0494769	447.629	69	32	9423	32	508	57.1	4.87	411	466	462	506	442	530	460	505	476	502	498	531	1		7.71441	7.69794	7.7209	7.86615	7.81825	7.7979	7.88702	7.85184	7.92326
	0.652488	0.116328	1.08397	High	Q9Y4R8	Telomere length regulation protein TEL2 homolog OS=Homo sapiens OX=9606	TELO2			0.498217	0.393725	44.59	17	8	74	8	837	91.7	5.76	7	4	8	6	6	5	5	4	8	4	7	7	1		-1.2845	-1.39672	-1.4993	-1.32666	-1.3307	-1.17416	-1.38944	-1.22881	-1.21497
	0.402639	0.116311	1.08396	High	Q14694	Ubiquitin carboxyl-terminal hydrolase 10 OS=Homo sapiens OX=9606	USP10			0.444302	0.428851	124.208	27	13	581	13	798	87.1	5.31	7	6	7	7	7	5	7	16	12	11	11	13	1	Met-loss+Acetyl [N-Term]	0.748734	0.565925	0.783824	0.744569	0.685802	1.01705	1.14996	0.786309	0.81027
	0.668747	0.116229	1.0839	High	P55854	Small ubiquitin-related modifier 3 OS=Homo sapiens OX=9606	SUMO3			0.521087	0.381012	8.947	12	1	159	1	103	11.6	5.49	4	4	5	3	7	4	6	4	6	5	8	4	1		1.70013	1.57084	1.75256	1.6759	1.85064	1.84567	1.65743	1.76095	1.40135
	1.49177	0.116109	1.08381	High	P47985	Cytochrome b-c1 complex subunit Rieske, mitochondrial OS=Homo sapiens OX=9606	UQCRFS1			1.8722	0.084916	66.763	40	9	825	9	274	29.6	8.32	24	27	23	20	28	34	23	30	44	36	24	32	1		3.985	3.92304	3.87843	4.04646	4.01207	4.07627	4.14422	4.03863	4.0977
	0.581075	0.115872	1.08363	High	Q9Y262	Eukaryotic translation initiation factor 3 subunit L OS=Homo sapiens OX=9606	EIF3L			0.249687	0.608766	192.9	56	27	1096	27	564	66.7	6.34	56	51	67	58	63	61	61	54	58	66	54	60	1	Met-loss+Acetyl [N-Term]	4.54367	4.62418	4.51495	4.51275	4.74107	4.77659	4.71091	4.81765	4.46172
	1.24614	0.11585	1.08361	High	Q15800	Methylsterol monooxygenase 1 OS=Homo sapiens OX=9606	MSMO1			0.301981	0.554971	23.977	8	2	127	2	293	35.2	7.23	8	6	8	8	9	8	7	9	11	9	7	7	1		-0.752295	-0.612681	-0.689208	-0.53892	-0.571424	-0.596289	-0.901173	-0.687823	-0.470051
	0.886935	0.115822	1.08359	High	P36957	Dihydrolipoyllysine-residue succinyltransferase component of 2-oxoglutarate dehydrogenase complex, mitochondrial OS=Homo sapiens OX=9606	DLST			1.19383	0.161112	60.688	25	8	722	8	453	48.7	8.95	35	39	39	33	36	42	39	31	43	46	35	44	1		3.03137	3.04173	3.11522	3.25579	3.07255	3.20745	3.23747	3.16997	3.31267
	0.242262	0.115767	1.08355	High	Q16610	Extracellular matrix protein 1 OS=Homo sapiens OX=9606	ECM1			0.369306	0.492467	41.076	20	7	165	7	540	60.6	6.71	14	12	13	17	8	13	8	6	4	13	8	12	1		-0.181067	-0.30536	-0.158013	0.0184107	-0.45784	0.14229	-0.0767403	-0.0386114	0.170143
	1.10426	0.115683	1.08349	High	P62906	60S ribosomal protein L10a OS=Homo sapiens OX=9606	RPL10A			1.94907	0.0768964	192.396	64	14	3023	14	217	24.8	9.94	65	68	64	75	59	80	83	90	78	82	78	85	1		4.83814	4.80377	4.92282	4.90736	5.02517	4.97924	5.23081	5.09401	5.05238
	0.681393	0.115595	1.08342	High	P61353	60S ribosomal protein L27 OS=Homo sapiens OX=9606	RPL27			1.01284	0.198369	71.293	45	6	1061	6	136	15.8	10.56	28	39	38	34	32	35	27	29	39	37	38	28	1		4.1828	4.1243	4.25208	4.16977	4.39337	4.34283	4.40198	4.43374	4.2926
	0.85926	0.115588	1.08342	High	Q02252	Methylmalonate-semialdehyde dehydrogenase [acylating], mitochondrial OS=Homo sapiens OX=9606	ALDH6A1			0.716978	0.287874	17.432	13	3	39	3	535	57.8	8.5	3	3	2	3	2	2	5	3	3	3	8	2	1		-0.539248	-0.552943	-0.613179	-0.393159	-0.569401	-0.396048	-0.536507	-0.571452	-0.476015
	0.593641	0.115498	1.08335	High	Q8N122	Regulatory-associated protein of mTOR OS=Homo sapiens OX=9606	RPTOR			0.358591	0.502408	28.702	4	4	60	4	1335	148.9	6.89	5	6	5	6	6	1	2	4	5	3	6	4	1		-1.38314	-1.6386	-1.5594	-1.48379	-1.33446	-1.41641	-1.58066	-1.38701	-1.47805
	0.53172	0.11543	1.0833	High	P55795	Heterogeneous nuclear ribonucleoprotein H2 OS=Homo sapiens OX=9606	HNRNPH2			0.857774	0.237213	161.77	44	13	994	9	449	49.2	6.3	29	30	35	27	34	32	33	39	38	43	43	34	1	Acetyl [N-Term]	0.359368	0.171477	0.0615969	0.239881	0.321732	0.377121	0.367619	0.394164	0.380138
	0.680239	0.115354	1.08324	High	P63173	60S ribosomal protein L38 OS=Homo sapiens OX=9606	RPL38			1.24939	0.152561	35.821	47	4	1153	4	70	8.2	10.1	20	28	28	35	27	36	30	33	41	35	38	38	1		2.05757	1.93474	2.17576	2.12271	2.15673	2.2347	2.29919	2.19781	2.33938
	0.787146	0.114611	1.08268	High	P56192	Methionine--tRNA ligase, cytoplasmic OS=Homo sapiens OX=9606	2001-03-01			0.349831	0.509061	80.445	22	12	295	12	900	101.1	6.16	23	18	19	23	19	26	24	23	27	23	20	21	1		1.75079	1.82572	1.77739	1.77727	1.99093	1.92953	1.91156	1.94122	1.69177
	0.534057	0.114574	1.08266	High	P42126	Enoyl-CoA delta isomerase 1, mitochondrial OS=Homo sapiens OX=9606	ECI1			0.57916	0.34979	18.437	17	3	82	3	302	32.8	8.54	7	2	7	6	7	8	6	4	10	6	8	10	1		-0.67073	-0.584912	-0.780992	-0.592208	-0.679138	-0.421564	-0.722839	-0.937972	-0.623972
	0.72562	0.11429	1.08244	High	P12110	Collagen alpha-2(VI) chain OS=Homo sapiens OX=9606	COL6A2			0.254968	0.602824	62.306	12	8	155	8	1019	108.5	6.21	11	8	7	8	12	9	9	8	10	14	11	15	1		1.18663	1.2231	1.40142	1.34245	1.37343	1.43814	1.33821	1.15787	1.50345
	1.09351	0.114274	1.08243	High	Q9NZM1	Myoferlin OS=Homo sapiens OX=9606	MYOF			1.6858	0.100272	643.375	51	79	6154	78	2061	234.6	6.18	193	207	193	206	207	215	219	219	216	210	216	229	1		5.20547	5.07428	5.17724	5.20966	5.2885	5.30165	5.33681	5.3054	5.44341
	0.403668	0.114076	1.08228	High	Q6P280	Zinc finger protein 529 OS=Homo sapiens OX=9606	ZNF529			0.209576	0.655724	4.409	2	1	7	1	563	65.8	8.21													1		0.47269	0.341813	0.609015	0.583823	0.43235	0.749573	0.58773	0.415132	0.661919
	2.05083	0.113967	1.0822	High	Q9H845	Complex I assembly factor ACAD9, mitochondrial OS=Homo sapiens OX=9606	ACAD9			1.88546	0.0841979	103.782	41	18	313	18	621	68.7	7.96	15	13	19	13	17	19	17	13	19	22	16	17	1		1.69378	1.68857	1.75385	1.83121	1.80389	1.843	1.88042	1.82955	1.98725
	1.28001	0.11373	1.08202	High	P00367	Glutamate dehydrogenase 1, mitochondrial OS=Homo sapiens OX=9606	GLUD1			1.62074	0.107736	184.75	53	21	1694	21	558	61.4	7.8	97	104	113	100	117	108	102	113	124	110	113	113	1		4.74611	4.70828	4.81017	4.90643	4.81116	4.88815	4.93189	4.87234	5.02028
	1.38802	0.113049	1.08151	High	Q8N4V1	ER membrane protein complex subunit 5 OS=Homo sapiens OX=9606	MMGT1	+	Cluster -67	3.16831	0.0394815	34.41	43	3	89	3	131	14.7	9.16	6	7	7	6	6	6	6	6	8	6	5	3	1		0.48932	0.596021	0.54819	0.690652	0.666567	0.615459	0.805447	0.785718	0.843506
	2.17166	0.113043	1.08151	High	Q14376	UDP-glucose 4-epimerase OS=Homo sapiens OX=9606	GALE			2.21159	0.0631935	23.741	35	6	131	6	348	38.3	6.73	11	8	13	9	8	14	12	10	10	12	11	9	1		-0.260766	-0.247619	-0.29798	-0.127849	-0.183046	-0.15634	-0.490437	-0.572453	-0.331528
	0.460056	0.112914	1.08141	High	P62081	40S ribosomal protein S7 OS=Homo sapiens OX=9606	RPS7			0.362088	0.499401	140.656	53	9	1142	9	194	22.1	10.1	24	21	22	29	33	30	34	35	36	38	34	29	1		3.60768	3.66469	3.41258	3.54733	3.80198	3.67438	3.87621	3.97975	3.46888
	0.273252	0.112861	1.08137	High	P36543	V-type proton ATPase subunit E 1 OS=Homo sapiens OX=9606	ATP6V1E1			0.321306	0.536552	20.457	26	5	173	5	226	26.1	8	7	5	3	5	4	6	7	2	11	6	5	7	1	Met-loss+Acetyl [N-Term]	0.0581179	0.141341	-0.323678	0.163268	0.14592	-0.0948238	0.460541	0.137197	-0.0271549
	1.38931	0.112797	1.08132	High	P50454	Serpin H1 OS=Homo sapiens OX=9606	SERPINH1			1.48701	0.122164	375.646	63	25	4418	25	418	46.4	8.69	160	174	176	187	202	198	196	201	204	215	206	231	1		6.31959	6.41183	6.35934	6.52343	6.47527	6.43045	6.43363	6.52332	6.52647
	0.788785	0.112725	1.08127	High	O75844	CAAX prenyl protease 1 homolog OS=Homo sapiens OX=9606	ZMPSTE24			1.18872	0.162214	60.751	21	6	196	6	475	54.8	7.49	16	15	17	14	18	11	14	13	16	12	12	12	1		0.652665	0.844707	0.642022	0.82368	0.832981	0.820908	0.93449	1.08132	0.835424
	0.0465416	0.112281	1.08094	High	Q9C0J8	pre-mRNA 3' end processing protein WDR33 OS=Homo sapiens OX=9606	WDR33			0.241452	0.618646	37.784	12	8	55	8	1336	145.8	9.17										1			1		-3.48357	-3.18786	-4.18801	-4.58327	-2.01451	-3.92482	-1.61548	-2.70953	-3.90398
	0.221622	0.112008	1.08073	High	Q9H583	HEAT repeat-containing protein 1 OS=Homo sapiens OX=9606	HEATR1			0.167611	0.709011	9.797	2	3	8	3	2144	242.2	6.54	1												1		-5.39065	-5.1611	-4.75867	-5.09273	-5.0219	-4.85975	-5.52448	-5.29509	-4.80075
	0.224196	0.111977	1.08071	High	O75937	DnaJ homolog subfamily C member 8 OS=Homo sapiens OX=9606	DNAJC8			0.355701	0.504453	48.345	32	8	366	8	253	29.8	9.06	18	21	19	25	22	22	23	20	19	20	17	17	1		1.73246	1.72472	1.7248	1.5583	2.21426	1.74534	1.55879	1.58794	1.69958
	0.473254	0.11186	1.08062	High	P13995	Bifunctional methylenetetrahydrofolate dehydrogenase/cyclohydrolase, mitochondrial OS=Homo sapiens OX=9606	MTHFD2			0.365024	0.496608	42.458	23	5	196	5	350	37.9	8.73	7	9	11	17	13	16	14	14	15	16	19	14	1		0.133798	0.183623	0.44592	0.422822	0.306677	0.369421	0.423155	0.254848	0.455616
	0.700582	0.11179	1.08057	High	Q9Y6N1	Cytochrome c oxidase assembly protein COX11, mitochondrial OS=Homo sapiens OX=9606	COX11			1.44511	0.125372	16.546	13	2	27	2	276	31.4	9.06	1	2	4	1	2		3	1	2	3	5	3	1		-2.41643	-2.41413	-2.43347	-2.38237	-2.16454	-2.38175	-2.14111	-2.03388	-2.25922
	0.28579	0.111602	1.08043	High	Q9NUM4	Transmembrane protein 106B OS=Homo sapiens OX=9606	TMEM106B			0.233765	0.62724	9.888	8	2	43	2	274	31.1	6.99	3	5	2	8	4	5	3	3	2	3	1	3	1		-0.913997	-1.04614	-1.08144	-1.02606	-0.605421	-1.07529	-1.12943	-0.882478	-1.15993
	0.520832	0.111436	1.0803	High	Q14165	Malectin OS=Homo sapiens OX=9606	MLEC			0.724118	0.284289	49.015	34	6	187	6	292	32.2	5.41	12	7	9	9	9	8	4	5	4	4	4	5	1		0.307233	0.346766	0.0723352	0.363389	0.282114	0.415138	0.33112	0.457221	0.469467
	0.482633	0.111337	1.08023	High	Q9HB40	Retinoid-inducible serine carboxypeptidase OS=Homo sapiens OX=9606	SCPEP1			0.254545	0.60327	18.228	9	4	219	4	452	50.8	5.81	17	15	11	13	15	15	17	17	15	12	14	16	1		0.308675	0.601844	0.364003	0.448848	0.593458	0.566227	0.45804	0.385821	0.609161
	0.165927	0.111333	1.08023	High	P49427	Ubiquitin-conjugating enzyme E2 R1 OS=Homo sapiens OX=9606	CDC34			0.143892	0.741399	8.258	11	2	37	2	236	26.7	4.54	4	4	2	6	3	4	3	3	3	1	1	3	1		-1.84937	-2.29684	-1.44495	-1.64152	-1.77635	-1.83929	-1.77578	-2.20671	-1.85755
	0.283168	0.111314	1.08021	High	Q6NYC1	Bifunctional arginine demethylase and lysyl-hydroxylase JMJD6 OS=Homo sapiens OX=9606	JMJD6			0.0675689	0.859188	14.256	14	4	43	4	403	46.4	8.69	5	6	3	5	2	2	4	5	1	1	4	2	1		-0.259131	0.165793	0.17051	0.275702	0.0673618	0.0680504	-0.278908	0.242446	0.2892
	0.0907162	0.11123	1.08015	High	O43572	A-kinase anchor protein 10, mitochondrial OS=Homo sapiens OX=9606	AKAP10			0.0941427	0.813708	7.768	5	2	14	2	662	73.8	6.39	2	1	2	1		1	1			3	1		1		-3.14107	-3.48898	-4.06015	-3.56091	-3.98755	-2.80805	-3.08115	-4.87669	-3.51151
	0.491838	0.1112	1.08013	High	P56937	3-keto-steroid reductase/17-beta-hydroxysteroid dehydrogenase 7 OS=Homo sapiens OX=9606	HSD17B7			0.921459	0.21475	5.227	6	1	6	1	341	38.2	8.1		1					1		1	1	1	1	1		-4.10483	-4.2042	-4.107	-4.12167	-4.11914	-3.84161	-4.11708	-4.36104	-4.47106
	0.407494	0.111072	1.08003	High	P46778	60S ribosomal protein L21 OS=Homo sapiens OX=9606	RPL21			0.773942	0.267869	62.862	33	5	679	5	160	18.6	10.49	6	16	11	13	12	12	19	20	21	21	14	18	1		3.08571	2.87074	3.20314	3.0673	3.14441	3.28109	3.29173	3.33404	3.19645
	1.62922	0.110946	1.07994	High	O43169	Cytochrome b5 type B OS=Homo sapiens OX=9606	CYB5B			1.09709	0.181334	52.261	49	4	285	4	150	16.7	4.97	15	10	14	14	16	16	12	14	17	14	17	15	1		1.39312	1.41111	1.47081	1.5453	1.49685	1.56574	1.58508	1.48687	1.73076
	0.273063	0.110873	1.07988	High	Q8IWE4	DCN1-like protein 3 OS=Homo sapiens OX=9606	DCUN1D3			0.20077	0.666339	16.999	16	3	48	3	304	34.3	5.12													1		-0.284072	-0.392438	-0.238397	-0.483424	-0.1518	0.0529366	-0.204704	-0.248851	-0.0746975
	0.532524	0.110627	1.0797	High	Q9P0I2	ER membrane protein complex subunit 3 OS=Homo sapiens OX=9606	EMC3			0.95396	0.208299	33.282	33	6	104	6	261	29.9	6.81	5	4	10	10	9	11	8	7	7	8	7	10	1		-0.647613	-0.453391	-0.363162	-0.3156	-0.374535	-0.44215	-0.106468	-0.41081	-0.0851059
	0.585546	0.110559	1.07965	High	O95881	Thioredoxin domain-containing protein 12 OS=Homo sapiens OX=9606	TXNDC12			0.414068	0.454261	42.868	42	5	198	5	172	19.2	5.4	6	8	9	11	12	13	14	11	11	18	9	13	1		1.71907	1.8854	2.00917	1.99205	1.98182	1.97144	1.99875	1.86917	2.21885
	0.928171	0.110465	1.07958	High	P15880	40S ribosomal protein S2 OS=Homo sapiens OX=9606	RPS2			1.91836	0.0804553	163.553	51	12	2726	12	293	31.3	10.24	63	77	77	72	65	63	76	77	83	85	81	75	1		4.49188	4.49954	4.54362	4.51637	4.66457	4.6855	4.74036	4.73241	4.69382
	0.186644	0.110382	1.07951	High	P23610	40-kDa huntingtin-associated protein OS=Homo sapiens OX=9606	F8A3			0.0647855	0.86402	5.838	7	1	6	1	371	39.1	6.84		1		1				1			1	2	1	Met-loss+Acetyl [N-Term]	-3.9392	-4.49981	-4.21522	-4.05531	-4.40304	-3.86474	-4.19758	-4.33115	-3.81555
	0.306214	0.110008	1.07923	High	O60885	Bromodomain-containing protein 4 OS=Homo sapiens OX=9606	BRD4			0.520008	0.381022	44.278	9	10	131	7	1362	152.1	9.19	2	1	2	2	1		1	2	2	2	2	1	1		-0.267467	-0.133731	-0.160367	-0.328105	-0.0613785	0.157942	-0.416779	-0.144595	-0.381805
	1.01874	0.109885	1.07914	High	P20908	Collagen alpha-1(V) chain OS=Homo sapiens OX=9606	COL5A1			0.923182	0.214605	126.443	13	11	367	11	1838	183.4	5.06	13	14	13	15	14	16	19	18	12	17	14	16	1		1.3697	1.45517	1.49499	1.56094	1.60345	1.48513	1.50698	1.54556	1.66844
	0.302464	0.109711	1.07901	High	Q9Y5U9	Immediate early response 3-interacting protein 1 OS=Homo sapiens OX=9606	IER3IP1			0.636886	0.320052	12.128	51	3	55	3	82	9	8.22	3	2	1	2	3	3	3	4	3	5	2	5	1		-1.64355	-1.80895	-1.93368	-1.80929	-1.44321	-1.80455	-1.40133	-1.61383	-1.59901
	0.624402	0.109706	1.07901	High	Q13895	Bystin OS=Homo sapiens OX=9606	BYSL			0.272849	0.586333	42.627	22	8	245	8	437	49.6	8.12	9	10	15	18	10	13	13	14	12	16	16	18	1		0.493752	0.56379	0.528556	0.696954	0.731386	0.486877	0.655373	0.756442	0.444513
	0.351158	0.109669	1.07898	High	Q96GQ7	Probable ATP-dependent RNA helicase DDX27 OS=Homo sapiens OX=9606	DDX27			0.82775	0.24574	54.666	20	12	364	12	796	89.8	9.28	4	8	3	5	4	5	6	8	7	7	4	5	1		0.343083	0.0212336	0.221864	0.220498	0.484095	0.210596	0.352264	0.482806	0.550793
	0.714289	0.109552	1.07889	High	P35613	Basigin OS=Homo sapiens OX=9606	BSG			0.825182	0.246753	90.822	34	9	844	9	385	42.2	5.66	34	33	34	30	31	30	31	35	34	28	35	28	1		3.12489	3.03513	3.08607	3.21541	3.2905	3.06883	3.27373	3.15298	3.24387
	1.25795	0.109545	1.07889	High	Q9NZI8	Insulin-like growth factor 2 mRNA-binding protein 1 OS=Homo sapiens OX=9606	IGF2BP1	+	Cluster -67	3.26202	0.0360909	99.829	31	14	1048	12	577	63.4	9.2	19	19	23	25	24	22	25	29	23	21	19	32	1		1.69551	1.60861	1.74195	1.78155	1.77774	1.81542	1.94143	1.9924	1.99008
	0.163046	0.109432	1.0788	High	Q9BUH6	Protein PAXX OS=Homo sapiens OX=9606	PAXX			0.273803	0.585498	4.916	6	1	6	1	204	21.6	5.48					1	1		1	1		1	1	1		-3.17102	-3.15597	-3.19127	-3.53935	-2.96988	-2.68074	-3.1246	-2.75137	-2.845
	0.458138	0.109246	1.07866	High	Q86V48	Leucine zipper protein 1 OS=Homo sapiens OX=9606	LUZP1			0.449534	0.424583	21.843	8	6	77	6	1076	120.2	8.5	4	3	4	5	5	5	6	3	4	6	5	5	1		-0.271827	-0.522082	-0.284366	-0.369597	-0.156027	-0.224913	-0.269159	-0.250613	-0.182701
	0.487351	0.108978	1.07846	High	Q9GZQ3	COMM domain-containing protein 5 OS=Homo sapiens OX=9606	COMMD5			0.364128	0.497593	4.013	9	1	13	1	224	24.7	7.02	1	1		2	1	2	2	1		2	1		1	Met-loss+Acetyl [N-Term]	-2.4396	-2.16289	-2.20427	-2.21799	-2.07076	-2.19109	-2.24067	-2.35031	-2.19595
	0.504175	0.108783	1.07832	High	P62136	Serine/threonine-protein phosphatase PP1-alpha catalytic subunit OS=Homo sapiens OX=9606	PPP1CA			0.535462	0.372385	197.449	67	21	1610	4	330	37.5	6.33	63	72	78	74	66	72	71	81	87	78	84	66	1		1.75652	1.70053	1.77136	2.02994	1.80062	1.72419	1.96815	1.84899	1.83358
	0.504085	0.108714	1.07827	High	Q9Y320	Thioredoxin-related transmembrane protein 2 OS=Homo sapiens OX=9606	TMX2			0.525422	0.379158	31.695	24	5	191	5	296	34	8.69	12	13	12	16	12	15	13	19	13	10	12	14	1		0.750148	0.976295	0.960299	1.0103	1.1049	0.89768	1.00437	1.13065	0.978024
	0.738213	0.10851	1.07811	High	Q9Y666	Solute carrier family 12 member 7 OS=Homo sapiens OX=9606	SLC12A7			0.677467	0.301845	30.096	7	4	96	4	1083	119	6.71	5	7	6	3	5	8	4	5	6	6	7	5	1		-0.0827856	-0.0613165	0.0553217	0.0454512	0.180895	0.0104027	0.0134583	0.0949125	0.108223
	2.148	0.108421	1.07805	High	P18031	Tyrosine-protein phosphatase non-receptor type 1 OS=Homo sapiens OX=9606	PTPN1	+	Cluster -67	3.07062	0.0456393	117.94	44	12	855	12	435	49.9	6.27	39	42	45	49	42	40	44	43	51	47	50	52	1		3.15348	3.09503	3.16002	3.23374	3.25104	3.249	3.32336	3.31418	3.39671
	0.798883	0.108321	1.07797	High	Q9NUT2	Mitochondrial potassium channel ATP-binding subunit OS=Homo sapiens OX=9606	ABCB8			0.421951	0.44853	29.461	12	5	77	5	735	79.9	8.98	3	1	5	7	3	5	7	10	9	7	6	6	1		-0.788074	-0.669362	-0.642589	-0.560664	-0.53607	-0.678328	-0.419933	-0.489444	-0.759569
	0.508074	0.108292	1.07795	High	P61019	Ras-related protein Rab-2A OS=Homo sapiens OX=9606	RAB2A			0.70987	0.290346	55.577	61	10	476	10	212	23.5	6.54	29	23	36	33	36	31	29	28	27	29	27	34	1	Met-loss+Acetyl [N-Term]	2.41998	2.19465	2.36572	2.38336	2.3595	2.56237	2.47002	2.45702	2.53689
	0.303007	0.108243	1.07791	High	P12235	ADP/ATP translocase 1 OS=Homo sapiens OX=9606	SLC25A4			0.436855	0.435475	91.509	44	13	1620	3	298	33	9.76	63	75	88	79	72	86	77	80	73	77	87	73	1	Met-loss+Acetyl [N-Term]	-0.471536	-0.824672	-0.442317	-0.326003	-0.591139	-0.496655	-0.275185	-0.516551	-0.331413
	0.486756	0.108014	1.07774	High	P46781	40S ribosomal protein S9 OS=Homo sapiens OX=9606	RPS9			1.00627	0.199249	71.583	37	11	3412	11	194	22.6	10.65	85	96	98	93	100	116	105	110	109	98	116	107	1		5.37641	5.16053	5.45808	5.40176	5.51581	5.40149	5.52454	5.57205	5.53113
	1.41989	0.107239	1.07716	High	P43304	Glycerol-3-phosphate dehydrogenase, mitochondrial OS=Homo sapiens OX=9606	GPD2			1.20792	0.161117	69.003	25	14	436	14	727	80.8	7.69	21	23	26	29	29	25	22	30	32	43	25	32	1		1.57826	1.56082	1.60812	1.74229	1.63079	1.69583	1.6615	1.69313	1.82129
	0.274137	0.107191	1.07713	High	P84103	Serine/arginine-rich splicing factor 3 OS=Homo sapiens OX=9606	SRSF3			1.3056	0.143557	34.286	26	4	477	3	164	19.3	11.65	13	12	9	9	8	10	10	12	11	10	12	10	1		1.20214	0.769191	0.922868	0.89424	1.11636	1.20517	1.45359	1.31386	1.35847
	0.832252	0.107151	1.0771	High	Q92508	Piezo-type mechanosensitive ion channel component 1 OS=Homo sapiens OX=9606	PIEZO1			1.20819	0.161208	69.84	7	11	234	11	2521	286.6	7.47	5	5	6	6	5	8	9	8	7	4	6	7	1		-0.0212622	-0.046771	-0.135451	0.0622759	-0.0540466	0.109739	0.142515	0.0305948	0.205952
	1.78509	0.106934	1.07694	High	P05023	Sodium/potassium-transporting ATPase subunit alpha-1 OS=Homo sapiens OX=9606	ATP1A1			2.27216	0.0617699	172.88	32	26	1488	26	1023	112.8	5.49	68	61	77	63	79	68	70	73	69	67	69	71	1		4.16885	4.21723	4.25367	4.29855	4.32898	4.33302	4.38075	4.34483	4.45271
	0.213356	0.106759	1.07681	High	P01023	Alpha-2-macroglobulin OS=Homo sapiens OX=9606	A2M			0.088213	0.822622	22.839	4	4	456	3	1474	163.2	6.46	25	35	29	23	21	30	24	19	27	26	30	25	1		3.2655	2.97892	3.57798	3.46677	3.20416	3.47174	3.23819	3.32714	3.4782
	1.61538	0.106757	1.07681	High	P14625	Endoplasmin OS=Homo sapiens OX=9606	HSP90B1			1.08403	0.183976	665.718	63	46	13220	44	803	92.4	4.84	447	538	556	553	563	644	581	639	622	663	673	707	1		7.88907	7.8723	7.92527	8.05151	7.96369	7.99172	8.00049	7.97537	8.17407
	0.0729079	0.106679	1.07675	High	Q9Y3C1	Nucleolar protein 16 OS=Homo sapiens OX=9606	NOP16			0.0572992	0.878901	14.779	19	3	56	3	178	21.2	9.94													1		-4.58065	-3.68744	-4.60729	-4.0856	-3.52191	-4.94783	-3.43729	-3.57509	-4.9719
	0.409244	0.106621	1.0767	High	P01344	Insulin-like growth factor II OS=Homo sapiens OX=9606	IGF2			0.275896	0.582609	12.125	18	3	355	3	180	20.1	9.32	11	12	10	15	12	17	16	19	14	15	14	11	1		0.911365	1.00034	1.141	0.96243	1.26575	1.14438	1.03327	1.18921	1.10892
	1.32958	0.10651	1.07662	High	O15460	Prolyl 4-hydroxylase subunit alpha-2 OS=Homo sapiens OX=9606	P4HA2			1.59609	0.108901	261.893	49	24	3373	24	535	60.9	5.71	111	139	131	145	143	156	138	151	143	155	143	154	1		5.38384	5.42374	5.50821	5.55671	5.54837	5.53023	5.55973	5.53447	5.62088
	0.618872	0.106459	1.07658	High	Q99623	Prohibitin-2 OS=Homo sapiens OX=9606	PHB2			0.306877	0.551357	118.531	51	14	1394	14	299	33.3	9.83	65	76	68	65	71	77	71	81	68	80	83	76	1		4.51793	4.52187	4.44166	4.73827	4.49126	4.5713	4.62361	4.43351	4.79714
	0.471655	0.106284	1.07645	High	P51688	N-sulphoglucosamine sulphohydrolase OS=Homo sapiens OX=9606	SGSH			0.396941	0.467558	76.79	33	9	368	9	502	56.7	6.95	22	23	27	28	22	24	28	22	21	22	21	29	1		1.86311	1.75606	1.86377	1.8086	1.88268	2.11051	1.83211	1.82758	1.85557
	0.312164	0.106218	1.0764	High	Q9Y6K0	Choline/ethanolaminephosphotransferase 1 OS=Homo sapiens OX=9606	CEPT1			0.412107	0.455716	5.758	6	2	49	2	416	46.5	8.21	3	5	2	1	2	1	5	4	2		3	1	1		-0.119763	0.254016	0.181804	0.0718699	0.34474	0.2181	0.0571308	-0.0123129	0.0766773
	0.243802	0.105946	1.0762	High	Q06124	Tyrosine-protein phosphatase non-receptor type 11 OS=Homo sapiens OX=9606	PTPN11			0.196127	0.673368	94.592	33	14	329	14	593	68	7.3	24	29	20	26	21	26	29	22	17	23	21	25	1		2.86826	2.74275	2.62184	2.54168	3.04666	2.96235	3.16224	2.9244	2.6781
	0.432514	0.105917	1.07618	High	P63010	AP-2 complex subunit beta OS=Homo sapiens OX=9606	AP2B1			0.743041	0.276603	294.955	47	40	1810	26	937	104.5	5.38	71	71	79	80	72	82	89	91	92	91	83	90	1		2.63505	2.77493	2.7796	2.68385	3.00607	2.81742	2.96706	3.01473	2.83076
	0.222922	0.105888	1.07616	High	Q9Y697	Cysteine desulfurase, mitochondrial OS=Homo sapiens OX=9606	NFS1			0.0933029	0.81489	13.641	8	3	27	3	457	50.2	8.31	4	2	1	5	3	2	2	4		1	1	2	1		-1.40789	-1.74737	-1.20994	-1.38826	-1.49735	-1.16192	-1.65578	-1.39225	-1.28918
	0.777018	0.105848	1.07613	High	Q5JSZ5	Protein PRRC2B OS=Homo sapiens OX=9606	PRRC2B			1.68923	0.0998667	33.628	5	6	62	5	2229	242.8	8.34	4	3	1	3	2	2	3	2	2	2	3	4	1		-2.36335	-2.16487	-2.25326	-2.10917	-2.15771	-2.19706	-2.37178	-2.84823	-2.66182
	1.2571	0.105748	1.07605	High	Q9BTV4	Transmembrane protein 43 OS=Homo sapiens OX=9606	TMEM43			1.43513	0.126287	120.713	45	12	988	12	400	44.8	8.13	51	47	43	64	60	55	50	59	53	52	60	56	1		3.73524	3.70843	3.66655	3.8298	3.74263	3.85503	3.84648	3.80839	3.95801
	0.781389	0.105696	1.07601	High	P13807	Glycogen [starch] synthase, muscle OS=Homo sapiens OX=9606	GYS1			0.55323	0.362445	175.538	47	24	1091	22	737	83.7	6.18	23	15	16	18	17	21	14	17	15	16	26	18	1		1.66624	1.53648	1.60666	1.63246	1.69151	1.80251	1.59996	1.94826	1.77266
	0.98887	0.105531	1.07589	High	Q9HCC0	Methylcrotonoyl-CoA carboxylase beta chain, mitochondrial OS=Homo sapiens OX=9606	MCCC2			1.00343	0.199526	52.818	23	8	212	8	563	61.3	7.68	15	17	22	22	17	13	15	20	20	15	15	14	1		0.306745	0.322682	0.221591	0.414365	0.312733	0.440514	0.390755	0.367728	0.517385
	0.555816	0.105192	1.07564	High	P16035	Metalloproteinase inhibitor 2 OS=Homo sapiens OX=9606	TIMP2			0.305027	0.552859	3.848	7	1	3	1	220	24.4	7.49					1	1					1		1		-3.16045	-3.0338	-3.0872	-3.07892	-2.83885	-3.04812	-3.23781	-2.9782	-3.0442
	1.6563	0.10508	1.07555	High	P25705	ATP synthase subunit alpha, mitochondrial OS=Homo sapiens OX=9606	ATP5F1A			2.41926	0.0607143	236.09	49	22	3764	22	553	59.7	9.13	192	207	226	213	205	227	202	234	205	218	222	234	1		6.74851	6.83322	6.79698	6.903	6.86937	6.92159	7.02172	6.92631	7.00501
	0.362002	0.105047	1.07553	High	O95772	STARD3 N-terminal-like protein OS=Homo sapiens OX=9606	STARD3NL			0.38048	0.482985	9.07	10	2	77	2	234	26.6	4.81	5	4	7	7	4	4	6	6	3	4	4	6	1		-0.0787039	-0.157344	-0.0296469	0.0942564	-0.210239	0.165428	0.0406418	-0.0230646	0.176901
	0.248064	0.104986	1.07548	High	P84243	Histone H3.3 OS=Homo sapiens OX=9606	H3-3B			0.241772	0.618333	28.442	32	2	63	1	136	15.3	11.27	4	5	2	4	2	4	3	5	4	4	3	2	1		-2.42789	-2.31681	-2.65009	-2.28112	-2.6246	-2.1741	-2.48133	-2.7075	-2.40331
	0.788241	0.104879	1.0754	High	P22570	NADPH:adrenodoxin oxidoreductase, mitochondrial OS=Homo sapiens OX=9606	FDXR			1.16402	0.167362	67.271	32	12	290	12	491	53.8	8.44	24	20	24	23	28	22	20	28	24	22	26	22	1		2.92819	3.0076	3.11188	3.09776	3.18156	3.083	3.18303	3.15162	3.14862
	0.115379	0.104721	1.07529	High	P30038	Delta-1-pyrroline-5-carboxylate dehydrogenase, mitochondrial OS=Homo sapiens OX=9606	ALDH4A1			0.112182	0.786697	13.579	8	3	57	3	563	61.7	8.07	5	3	4	5	4	6	4	1	3	4	5	5	1		-1.80992	-2.38489	-1.44144	-1.51774	-1.67664	-2.1277	-1.15008	-2.32897	-1.27205
	1.67611	0.104553	1.07516	High	O75964	ATP synthase subunit g, mitochondrial OS=Homo sapiens OX=9606	ATP5MG			2.00994	0.0733333	23.505	34	3	335	3	103	11.4	9.64	21	24	21	28	22	21	24	19	26	24	22	28	1		2.7058	2.68784	2.77165	2.83654	2.8409	2.80152	2.95744	2.83285	2.89876
	0.701195	0.104394	1.07504	High	Q10469	Alpha-1,6-mannosyl-glycoprotein 2-beta-N-acetylglucosaminyltransferase OS=Homo sapiens OX=9606	MGAT2			1.15976	0.168334	26.333	13	4	175	4	447	51.5	8.76	13	10	9	6	14	13	10	13	11	11	9	11	1		0.148183	0.0236807	0.256997	0.256177	0.231033	0.254831	0.359486	0.256503	0.465101
	0.930438	0.104355	1.07501	High	P09543	2',3'-cyclic-nucleotide 3'-phosphodiesterase OS=Homo sapiens OX=9606	CNP			1.06686	0.187257	90.667	42	13	465	13	421	47.5	9.07	33	24	27	34	36	36	39	29	36	33	38	30	1		2.69716	2.82957	2.76976	2.92117	2.88747	2.80091	2.83916	2.93398	2.89558
	0.25247	0.104294	1.07497	High	P62273	40S ribosomal protein S29 OS=Homo sapiens OX=9606	RPS29			0.156374	0.7262	5.395	13	1	208	1	56	6.7	10.13	6	4	5	7	5	3	5	4	4	3	5	3	1		0.413295	0.083951	0.333533	0.151635	0.603426	0.388601	0.265951	0.453305	-0.0246887
	0.96056	0.104252	1.07494	High	P18859	ATP synthase-coupling factor 6, mitochondrial OS=Homo sapiens OX=9606	ATP5PF			1.00749	0.199586	22.122	31	3	155	3	108	12.6	9.52	9	14	15	10	11	7	9	5	6	6	11	11	1		2.38649	2.38324	2.46529	2.44314	2.59251	2.51213	2.47627	2.5476	2.62565
	0.616892	0.104129	1.07484	High	Q86Y46	Keratin, type II cytoskeletal 73 OS=Homo sapiens OX=9606	KRT73			0.683597	0.299839	11.467	6	3	203	2	540	58.9	7.23	2	5		6	2	3	7	8	2	5	6	6	1		1.79375	1.68399	1.86013	1.96886	1.77857	1.90282	1.97039	1.81914	2.04888
	0.871729	0.104019	1.07476	High	Q99653	Calcineurin B homologous protein 1 OS=Homo sapiens OX=9606	CHP1			1.22234	0.157075	14.932	18	3	142	3	195	22.4	5.1	7	4	7	7	9	9	6	7	5	11	4	11	1		-0.326835	-0.285689	-0.340875	-0.109538	-0.282633	-0.249172	0.00292969	-0.233222	-0.0394955
	0.454547	0.10396	1.07472	High	O60826	Coiled-coil domain-containing protein 22 OS=Homo sapiens OX=9606	CCDC22			0.398778	0.466313	51.861	20	7	60	7	627	70.7	6.74	5	4	5	6	6	4	4	6	3	5	4	4	1		-0.198464	-0.219552	-0.24599	0.0777121	-0.208254	-0.221584	-0.0954018	0.0655375	-0.198664
	0.289419	0.103543	1.07441	High	Q9HBH1	Peptide deformylase, mitochondrial OS=Homo sapiens OX=9606	PDF			0.155987	0.72625	7.526	9	1	27	1	243	27	9.16	1	3	2	1	3	3	2	3	1	3	2	3	1		-3.19913	-3.08618	-3.49689	-3.0847	-3.07607	-3.3108	-3.26774	-3.08871	-3.17763
	0.54453	0.103507	1.07438	High	Q6PI48	Aspartate--tRNA ligase, mitochondrial OS=Homo sapiens OX=9606	DARS2			0.874782	0.230625	59.715	26	11	364	11	645	73.5	8.02	25	26	30	28	30	31	23	23	26	31	20	28	1		1.73719	1.79063	1.93425	1.97099	1.80517	1.99644	1.96544	1.95809	2.10654
	0.58471	0.10292	1.07394	High	P02786	Transferrin receptor protein 1 OS=Homo sapiens OX=9606	TFRC			0.68152	0.300172	184.005	40	25	2446	25	760	84.8	6.61	102	103	110	106	105	117	115	120	100	118	106	121	1		4.90488	4.6857	4.86842	4.88688	4.87918	5.0017	4.90241	4.94173	5.07159
	0.585651	0.102614	1.07372	High	O14828	Secretory carrier-associated membrane protein 3 OS=Homo sapiens OX=9606	SCAMP3			0.712077	0.289596	44.806	31	5	241	5	347	38.3	7.64	14	11	16	16	16	19	19	24	22	19	18	21	1		1.43601	1.66131	1.53721	1.6482	1.72196	1.57221	1.66066	1.66507	1.68692
	0.236874	0.10243	1.07358	High	Q9NP80	Calcium-independent phospholipase A2-gamma OS=Homo sapiens OX=9606	PNPLA8			0.303851	0.553308	3.85	2	1	4	1	782	88.4	9.23									1	1		2	1		-4.35326	-4.63622	-4.75079	-4.25356	-4.50428	-4.67514	-4.45529	-4.47778	-4.23119
	0.539379	0.10238	1.07354	High	Q14738	Serine/threonine-protein phosphatase 2A 56 kDa regulatory subunit delta isoform OS=Homo sapiens OX=9606	PPP2R5D			0.318971	0.539168	73.306	24	10	219	7	602	69.9	8.13	20	17	20	16	22	14	16	21	18	13	15	18	1		0.0101881	-0.165858	-0.191352	-0.121295	0.057085	0.0243282	-0.148687	0.0782747	-0.000705719
	0.543097	0.102323	1.0735	High	Q07020	60S ribosomal protein L18 OS=Homo sapiens OX=9606	RPL18			0.879956	0.228914	65.646	32	8	1350	8	188	21.6	11.72	36	41	31	30	34	39	32	36	37	37	34	41	1		4.11114	4.19613	4.22243	4.143	4.40645	4.28722	4.35736	4.42243	4.28885
	0.670617	0.102081	1.07332	High	P52298	Nuclear cap-binding protein subunit 2 OS=Homo sapiens OX=9606	NCBP2			0.696473	0.294658	15.169	22	2	162	2	156	18	8.21	5	4	6	6	7	6	4	5	6	6	4	5	1		-1.1025	-1.22568	-1.23052	-1.10481	-1.16724	-0.980406	-1.26301	-1.17977	-1.16124
	0.740956	0.101852	1.07315	High	Q9BZD4	Kinetochore protein Nuf2 OS=Homo sapiens OX=9606	NUF2			0.946199	0.209415	27.491	15	5	135	5	464	54.3	8.27	14	11	9	11	13	11	9	11	13	7	12	9	1		-0.00949574	-0.156287	-0.0456629	0.0743952	-0.0586395	0.0783558	0.0224152	0.0770063	0.0731716
	0.365416	0.101615	1.07297	High	P14678	Small nuclear ribonucleoprotein-associated proteins B and B' OS=Homo sapiens OX=9606	SNRPB			1.74574	0.0942505	40.11	19	5	375	5	240	24.6	11.19	12	9	11	9	7	9	9	12	9	10	12	9	1		1.72446	1.45799	1.43134	1.70548	1.71123	1.50192	2.00826	2.16065	1.85003
	0.325425	0.101586	1.07295	High	P06737	Glycogen phosphorylase, liver form OS=Homo sapiens OX=9606	PYGL			0.175685	0.700075	151.376	29	24	1142	18	847	97.1	7.17	51	50	45	43	45	44	51	51	44	39	42	49	1		2.50878	2.31358	2.27204	2.39759	2.32808	2.6735	2.31952	2.7827	2.41355
	1.00094	0.101586	1.07295	High	Q658P3	Metalloreductase STEAP3 OS=Homo sapiens OX=9606	STEAP3			1.37357	0.131697	31.733	13	5	124	5	488	54.6	8.6	3	6	4	3	6	4	3	5	6	7	5	7	1		0.228379	0.0796061	0.208913	0.284022	0.282379	0.255255	0.288063	0.292829	0.366611
	0.541134	0.101545	1.07292	High	Q13217	DnaJ homolog subfamily C member 3 OS=Homo sapiens OX=9606	DNAJC3			0.509407	0.387692	131.651	42	15	379	15	504	57.5	6.15	28	18	24	22	21	24	24	25	28	24	21	25	1		1.89758	2.09772	2.13131	2.1574	2.0699	2.20395	2.21474	2.05362	2.33078
	0.797847	0.101251	1.0727	High	Q6Y7W6	GRB10-interacting GYF protein 2 OS=Homo sapiens OX=9606	GIGYF2			1.33601	0.138382	37.075	8	7	192	7	1299	150	5.54	11	5	8	8	15	8	8	6	9	5	7	5	1	Met-loss+Acetyl [N-Term]	-0.0264006	-0.13123	-0.214112	-0.0274382	-0.0583286	0.0177765	0.00111389	0.0504427	0.115126
	0.509971	0.10107	1.07257	High	O75494	Serine/arginine-rich splicing factor 10 OS=Homo sapiens OX=9606	SRSF10			0.853836	0.238039	26.171	19	4	79	4	262	31.3	11.27													1		1.0075	0.957812	1.06738	1.00841	1.05623	1.27125	1.20134	1.11848	1.28753
	1.56389	0.101039	1.07255	High	P42704	Leucine-rich PPR motif-containing protein, mitochondrial OS=Homo sapiens OX=9606	LRPPRC			2.34472	0.059	514.178	56	57	3173	57	1394	157.8	6.13	149	163	164	190	172	184	170	180	181	183	184	194	1		5.37967	5.46214	5.37624	5.51656	5.48756	5.51703	5.54453	5.55768	5.61927
	0.619571	0.100833	1.07239	High	A4D1E9	GTP-binding protein 10 OS=Homo sapiens OX=9606	GTPBP10			0.431998	0.439744	6.672	7	2	27	2	387	42.9	9.03	2	1		2	2	1	2	1	1	1	1	2	1		-2.36146	-2.45336	-2.51973	-2.24524	-2.34423	-2.44257	-2.43713	-2.42692	-2.3316
	0.894762	0.100775	1.07235	High	P62263	40S ribosomal protein S14 OS=Homo sapiens OX=9606	RPS14			0.920923	0.214778	109.061	67	10	852	10	151	16.3	10.05	18	18	11	17	15	17	21	20	22	23	27	23	1		3.64489	3.50551	3.62422	3.65098	3.74951	3.67646	3.83068	3.89298	3.6298
	0.171786	0.100641	1.07225	High	Q8IXB1	DnaJ homolog subfamily C member 10 OS=Homo sapiens OX=9606	DNAJC10			0.556546	0.36096	50.41	18	7	134	7	793	91	7.18	6	7	7	4	5	7	3	8	7	8	5	10	1		-0.929824	-0.95164	-0.898961	-1.24486	-0.740013	-0.493626	-0.474266	-0.804774	-0.436502
	0.275969	0.100506	1.07215	High	P07919	Cytochrome b-c1 complex subunit 6, mitochondrial OS=Homo sapiens OX=9606	UQCRH			1.06304	0.187411	35.531	30	3	474	3	91	10.7	4.44	15	20	18	19	20	21	14	22	16	23	22	20	1		1.83185	1.57639	1.3942	1.82021	1.56956	1.7142	2.08425	1.80358	2.01575
	0.52724	0.100332	1.07202	High	Q8N2K0	Lysophosphatidylserine lipase ABHD12 OS=Homo sapiens OX=9606	ABHD12			0.278388	0.579451	36.301	28	7	102	7	398	45.1	8.65	5	10	8	7	6	7	7	10	5	8	8	13	1		0.163178	0.182033	0.055335	0.115315	0.216778	0.36945	0.177792	0.0503054	0.268656
	0.527456	0.100267	1.07197	High	Q9UNQ2	Probable dimethyladenosine transferase OS=Homo sapiens OX=9606	DIMT1			1.87473	0.0851487	26.074	33	7	166	7	313	35.2	9.99					1		2	1	1	2	1		1		-1.71431	-1.81785	-1.67424	-1.64732	-1.7532	-1.50506	-1.43922	-1.42511	-1.45308
	1.07479	0.10025	1.07196	High	Q00610	Clathrin heavy chain 1 OS=Homo sapiens OX=9606	CLTC			1.01134	0.198432	1054.45	64	84	10110	67	1675	191.5	5.69	353	425	401	398	382	389	423	455	436	448	442	418	1		6.84816	6.79032	6.74446	6.83807	6.94875	6.89687	6.94582	6.99355	6.83839
	0.837287	0.100154	1.07189	High	A0FGR8	Extended synaptotagmin-2 OS=Homo sapiens OX=9606	ESYT2			0.465545	0.41602	114.752	35	19	581	19	921	102.3	9.26	43	39	32	39	40	43	33	35	44	35	39	39	1		2.19211	2.36048	2.29329	2.33452	2.387	2.42482	2.24288	2.4163	2.40895
	0.912413	0.100051	1.07181	High	Q8NBJ5	Procollagen galactosyltransferase 1 OS=Homo sapiens OX=9606	COLGALT1			0.962728	0.207267	87.292	27	16	1135	16	622	71.6	7.31	47	50	56	53	46	58	59	60	56	60	54	64	1		3.03402	3.02248	3.12997	3.20614	3.08608	3.19439	3.18691	3.13228	3.29427
	1.46071	0.0999991	1.07177	High	Q6ZRP7	Sulfhydryl oxidase 2 OS=Homo sapiens OX=9606	QSOX2			1.84623	0.0856837	54.8	17	8	206	8	698	77.5	7.72	11	18	15	16	18	15	17	12	13	14	11	13	1		0.272553	0.27658	0.254458	0.427213	0.322418	0.353958	0.38295	0.351693	0.381998
	0.249112	0.0998987	1.0717	High	Q13740	CD166 antigen OS=Homo sapiens OX=9606	ALCAM			0.463416	0.416666	123.061	42	15	697	15	583	65.1	6.25	37	34	39	33	37	35	32	41	36	32	40	47	1		2.24889	2.11179	2.29428	2.31163	2.06341	2.57962	2.48975	2.26887	2.64954
	0.721098	0.0993875	1.07132	High	P61923	Coatomer subunit zeta-1 OS=Homo sapiens OX=9606	COPZ1			0.775516	0.267459	9.402	12	2	125	2	177	20.2	4.81	8	10	6	8	7	10	9	7	9	7	5	9	1		0.651582	0.489114	0.587607	0.699908	0.732412	0.594145	0.773548	0.715953	0.630203
	0.713349	0.0991376	1.07113	High	Q14956	Transmembrane glycoprotein NMB OS=Homo sapiens OX=9606	GPNMB			0.630827	0.322784	61.777	8	5	260	5	572	63.9	6.64	13	13	14	15	14	17	15	14	16	18	17	18	1		1.88164	2.04857	2.07702	2.07518	2.13554	2.09392	2.05958	2.07832	2.19216
	0.450585	0.0990988	1.0711	High	P49792	E3 SUMO-protein ligase RanBP2 OS=Homo sapiens OX=9606	RANBP2			0.609885	0.331219	451.108	36	67	1151	67	3224	358	6.2	21	17	25	17	20	17	29	26	21	33	31	21	1		2.23107	2.28212	2.24524	2.21588	2.53092	2.30893	2.59818	2.54803	2.26379
	0.183845	0.0990397	1.07106	High	Q99459	Cell division cycle 5-like protein OS=Homo sapiens OX=9606	CDC5L			0.117404	0.777691	155.814	37	18	778	18	802	92.2	8.18	23	17	17	14	19	18	19	13	19	19	17	16	1		1.34443	0.927011	1.03914	1.04022	1.03853	1.52895	1.45234	1.22652	1.0542
	1.81083	0.0989774	1.07101	High	Q16706	Alpha-mannosidase 2 OS=Homo sapiens OX=9606	MAN2A1			2.70421	0.0563846	105.389	27	20	638	20	1144	131.1	7.58	28	27	19	28	31	23	32	32	29	28	32	38	1		1.43179	1.40996	1.35179	1.48924	1.50673	1.49451	1.6489	1.60662	1.76324
	0.337309	0.098973	1.07101	High	P55011	Solute carrier family 12 member 2 OS=Homo sapiens OX=9606	SLC12A2			0.195481	0.67395	155.972	21	19	900	19	1212	131.4	6.4	45	38	32	35	48	37	39	35	39	40	37	40	1		4.41671	4.21152	4.3702	4.38855	4.27711	4.62969	4.43308	4.3588	4.37307
	0.336011	0.0988687	1.07093	High	O00411	DNA-directed RNA polymerase, mitochondrial OS=Homo sapiens OX=9606	POLRMT			0.569098	0.355648	15.841	5	3	37	3	1230	138.5	8.98	2	2	1	2	1	1	2	1	2				1		-2.73782	-3.00891	-2.87284	-2.63469	-2.95024	-2.73804	-2.96824	-2.85111	-3.3422
	0.274489	0.0987689	1.07086	High	Q06033	Inter-alpha-trypsin inhibitor heavy chain H3 OS=Homo sapiens OX=9606	ITIH3			0.264104	0.594643	9.752	2	2	74	2	890	99.8	5.74	3	2	3	2	2	1	3	2	3	2	2	1	1		-0.688582	-0.780528	-0.389047	-0.42797	-0.686098	-0.447783	-0.415546	-0.653548	-0.272905
	0.369007	0.0987072	1.07081	High	Q96SL4	Glutathione peroxidase 7 OS=Homo sapiens OX=9606	GPX7			0.156819	0.725562	26.556	30	2	68	2	187	21	8.27	3	5	4	5	5	4	6	9	5	6	3	6	1		-0.859769	-0.641086	-0.879018	-0.821914	-0.720026	-0.541811	-0.629869	-0.730857	-0.919334
	0.537286	0.0986646	1.07078	High	Q8N5N7	39S ribosomal protein L50, mitochondrial OS=Homo sapiens OX=9606	MRPL50			0.676895	0.301747	32.342	47	5	161	5	158	18.3	7.88	10	13	7	12	13	8	9	10	12	14	9	15	1		0.694852	0.621924	0.602122	0.664628	0.660086	0.890179	0.879192	0.668885	0.951242
	0.229419	0.098292	1.07051	High	Q92522	Histone H1.10 OS=Homo sapiens OX=9606	H1-10			0.131244	0.759137	21.247	19	4	252	4	213	22.5	10.76	7	5	5	4	6	6	7	5	11	6	8	8	1	Met-loss+Acetyl [N-Term]	-0.0507612	-0.44238	-0.1909	-0.360965	0.0570278	-0.085228	-0.0107841	-0.240285	-0.118206
	0.587343	0.0982386	1.07047	High	O43324	Eukaryotic translation elongation factor 1 epsilon-1 OS=Homo sapiens OX=9606	EEF1E1			0.321478	0.53673	19.55	25	4	251	4	174	19.8	8.54	14	18	15	18	14	15	13	16	10	16	14	15	1	Met-loss+Acetyl [N-Term]	0.663449	0.606797	0.601935	0.698855	0.610962	0.85708	0.622162	0.668002	0.859785
	0.708263	0.0981916	1.07043	High	O14656	Torsin-1A OS=Homo sapiens OX=9606	TOR1A			0.24517	0.614239	34.877	27	6	112	6	332	37.8	6.99	5	10	14	6	8	10	9	10	5	10	9	7	1		-0.215072	-0.142632	-0.152919	0.0208559	-0.181807	-0.0550976	-0.168388	-0.193471	0.127014
	0.118074	0.0978737	1.07019	High	Q6R327	Rapamycin-insensitive companion of mTOR OS=Homo sapiens OX=9606	RICTOR			0.0838522	0.830831	7.633	1	1	5	1	1708	192.1	7.47	1	1						1		1	1		1		-3.40523	-3.2829	-4.17224	-3.72585	-3.32162	-3.51928	-3.6845	-2.99969	-3.60224
	0.167744	0.0978406	1.07017	High	Q9H7B2	Ribosome production factor 2 homolog OS=Homo sapiens OX=9606	RPF2			0.0674569	0.859105	18.705	18	4	25	4	306	35.6	9.99								1	1				1		-2.0081	-2.09409	-1.66369	-2.17385	-1.69015	-1.60836	-1.99112	-1.9148	-1.80769
	0.201671	0.0972061	1.0697	High	Q8IXT5	RNA-binding protein 12B OS=Homo sapiens OX=9606	RBM12B			0.077011	0.841797	19.473	4	3	33	3	1001	118	6.81							1				1		1		-0.939893	-1.35333	-1.03058	-1.27644	-0.936329	-0.819418	-0.948895	-1.19882	-0.971447
	0.446173	0.0969652	1.06952	High	Q9UNW1	Multiple inositol polyphosphate phosphatase 1 OS=Homo sapiens OX=9606	MINPP1			0.69652	0.294735	43.213	18	6	124	6	487	55	7.81	11	7	15	7	10	10	11	11	10	8	8	14	1		-0.627065	-0.532332	-0.502313	-0.30387	-0.599611	-0.467333	-0.36582	-0.46141	-0.31991
	1.5143	0.0968882	1.06946	High	Q9HDC9	Adipocyte plasma membrane-associated protein OS=Homo sapiens OX=9606	APMAP			1.59846	0.109002	147.812	53	16	1121	16	416	46.5	6.16	50	59	52	75	59	66	68	63	69	67	53	74	1		4.44359	4.41574	4.50675	4.57637	4.54368	4.5367	4.5929	4.57955	4.73665
	0.297581	0.0968526	1.06944	High	Q9HCD6	Protein TANC2 OS=Homo sapiens OX=9606	TANC2			0.190486	0.679821	29.225	6	6	50	6	1990	219.5	8.07	3	6	2	3	5	4	8	2	5	7	3	2	1		-0.442836	-0.780309	-0.855893	-0.66639	-0.545162	-0.576927	-0.748398	-0.774213	-0.576183
	1.34164	0.0967229	1.06934	High	Q9UBS4	DnaJ homolog subfamily B member 11 OS=Homo sapiens OX=9606	DNAJB11			1.00123	0.199372	153.795	47	13	925	13	358	40.5	6.18	41	49	53	48	56	49	47	45	55	55	52	50	1		3.02252	2.94854	2.97311	3.12955	3.04988	3.0549	3.07072	3.04978	3.22179
	0.493703	0.0964362	1.06913	High	P63096	Guanine nucleotide-binding protein G(i) subunit alpha-1 OS=Homo sapiens OX=9606	GNAI1			0.772752	0.268238	59.146	38	12	950	4	354	40.3	5.97	24	25	30	19	21	31	34	32	30	34	29	29	1		-1.82202	-1.6908	-1.89989	-1.79452	-1.59402	-1.73487	-1.62758	-1.6298	-1.68772
	0.396938	0.0963326	1.06905	High	Q8TC12	Retinol dehydrogenase 11 OS=Homo sapiens OX=9606	RDH11			0.286431	0.571182	41.415	26	6	254	6	318	35.4	8.82	16	16	21	20	17	17	17	15	20	14	14	16	1		1.41932	1.71851	1.66728	1.7069	1.77052	1.61669	1.69353	1.61684	1.80112
	1.13992	0.0961825	1.06894	High	P40926	Malate dehydrogenase, mitochondrial OS=Homo sapiens OX=9606	MDH2			1.29204	0.144117	202.718	63	19	2963	19	338	35.5	8.68	137	159	151	156	163	163	156	163	174	162	187	183	1		6.5766	6.678	6.62177	6.74383	6.75267	6.66842	6.74901	6.69058	6.77144
	0.295234	0.0961469	1.06891	High	Q9BX68	Adenosine 5'-monophosphoramidase HINT2 OS=Homo sapiens OX=9606	HINT2			0.505138	0.389768	35.602	48	5	295	5	163	17.2	9.16	20	22	25	17	21	19	19	20	21	20	19	18	1		1.10766	0.946124	0.790404	1.1943	0.86813	1.0702	1.11631	1.06118	1.26888
	0.341872	0.0960712	1.06886	High	Q9BQE3	Tubulin alpha-1C chain OS=Homo sapiens OX=9606	TUBA1C			0.735497	0.279128	588.805	84	32	21639	3	449	49.9	5.1	1005	1084	1103	1174	1117	1175	1211	1153	1138	1116	1247	1119	1		2.92913	2.72902	2.53997	2.87848	2.77495	2.83291	2.9138	2.99523	2.91271
	0.49694	0.0958907	1.06873	High	P61026	Ras-related protein Rab-10 OS=Homo sapiens OX=9606	RAB10			1.50846	0.119068	52.891	34	6	782	4	200	22.5	8.38	43	36	47	38	39	46	36	36	38	35	40	43	1		1.01895	1.29602	1.19354	1.29267	1.28489	1.21863	1.38707	1.41804	1.4785
	1.29227	0.095775	1.06864	High	O15228	Dihydroxyacetone phosphate acyltransferase OS=Homo sapiens OX=9606	GNPAT			2.8747	0.0529877	25.304	12	6	82	6	680	77.1	6.57	4	5	8	6	8	6	7	6	8	7	5	11	1		-0.894822	-0.863355	-0.924533	-0.804107	-0.847225	-0.744053	-0.655067	-0.706187	-0.639814
	0.0895231	0.0957222	1.0686	High	O15226	NF-kappa-B-repressing factor OS=Homo sapiens OX=9606	NKRF			0.101725	0.801555	21.852	10	4	15	4	690	77.6	8.79													1		-3.8227	-3.74238	-3.27342	-3.99851	-2.86133	-3.6915	-3.42974	-2.99955	-3.68068
	0.0754536	0.095679	1.06857	High	Q53TN4	Plasma membrane ascorbate-dependent reductase CYBRD1 OS=Homo sapiens OX=9606	CYBRD1			0.33401	0.52422	10.569	12	3	91	3	286	31.6	8.76			2				1		3	1	1	2	1		-2.08288	-1.93902	-1.21309	-2.14099	-1.84758	-0.959387	-1.4677	-1.32193	-1.0203
	0.941198	0.0952282	1.06823	High	P51571	Translocon-associated protein subunit delta OS=Homo sapiens OX=9606	SSR4			0.834951	0.242698	34.773	31	4	747	4	173	19	6.15	29	33	38	29	33	30	32	34	41	39	42	44	1		2.60538	2.60785	2.50107	2.7152	2.60723	2.67756	2.92335	2.66105	2.68013
	0.629001	0.0951195	1.06815	High	Q9HD45	Transmembrane 9 superfamily member 3 OS=Homo sapiens OX=9606	TM9SF3			0.748206	0.274483	69.305	17	8	620	8	589	67.8	7.21	35	32	33	30	32	33	30	35	31	36	27	30	1		2.17494	2.30562	2.08779	2.31442	2.2347	2.30459	2.346	2.311	2.26932
	0.48366	0.0951188	1.06815	High	P61313	60S ribosomal protein L15 OS=Homo sapiens OX=9606	RPL15			0.58	0.34953	86.941	33	9	1188	9	204	24.1	11.62	26	41	31	40	31	42	39	40	29	31	39	27	1		3.92423	3.91627	3.87528	3.92614	4.16832	3.90667	4.05925	4.28604	3.95439
	0.501281	0.0947316	1.06787	High	Q96EY7	Pentatricopeptide repeat domain-containing protein 3, mitochondrial OS=Homo sapiens OX=9606	PTCD3			0.741286	0.276624	61.405	26	10	195	10	689	78.5	6.42	13	12	15	10	12	12	14	13	10	8	5	10	1		0.72786	0.69402	0.718925	0.800937	0.670214	0.95385	0.871086	0.820073	0.891611
	0.0598287	0.0943947	1.06762	High	Q92759	General transcription factor IIH subunit 4 OS=Homo sapiens OX=9606	GTF2H4			0.0174805	0.961607	6.927	7	2	11	2	462	52.2	9.04	1		1		3	1	2		1		1	1	1		-2.21867	-3.67174	-2.01263	-2.32087	-2.44217	-2.85681	-2.77258	-2.49065	-2.72544
	0.259733	0.0941188	1.06741	High	O15400	Syntaxin-7 OS=Homo sapiens OX=9606	STX7			0.484863	0.403783	10.772	10	1	26	1	261	29.8	5.55		2	1	1	2	1	1	1	2	1	2	1	1		-2.9315	-2.81919	-2.91593	-3.06292	-2.59105	-2.73029	-2.64308	-2.66686	-2.75854
	0.256721	0.0940857	1.06739	High	Q9UBV8	Peflin OS=Homo sapiens OX=9606	PEF1			0.0517712	0.888257	23.177	14	4	89	4	284	30.4	6.54	3	3	2	2	2	2	2	3	1	1	3	1	1		-1.63734	-1.84411	-1.90971	-1.94036	-1.61947	-1.54907	-2.1082	-1.44291	-1.61536
	0.167602	0.0940469	1.06736	High	Q02083	N-acylethanolamine-hydrolyzing acid amidase OS=Homo sapiens OX=9606	NAAA			0.104813	0.796508	6.65	9	2	7	2	359	40	8.75				1	1			1	1	1	2		1		-4.00309	-4.0301	-4.08428	-4.35319	-3.65259	-3.82954	-4.01451	-3.82274	-3.91872
	0.805972	0.0940412	1.06736	High	P07339	Cathepsin D OS=Homo sapiens OX=9606	CTSD			1.29649	0.143832	123.144	39	12	1792	12	412	44.5	6.54	76	86	82	83	99	97	82	101	92	99	106	107	1		5.16193	5.10714	5.25527	5.26661	5.21405	5.3258	5.32937	5.29411	5.3247
	0.233854	0.0938644	1.06723	High	Q9BTZ2	Dehydrogenase/reductase SDR family member 4 OS=Homo sapiens OX=9606	DHRS4			0.352	0.50731	10.419	10	3	187	3	278	29.5	8.56	13	14	18	12	14	14	12	16	14	13	12	13	1		0.862079	0.888238	1.23223	1.19443	0.881859	1.18785	1.11566	1.07887	1.43385
	0.719744	0.0937659	1.06715	High	Q8IV08	5'-3' exonuclease PLD3 OS=Homo sapiens OX=9606	PLD3			0.69077	0.296412	80.959	36	13	592	13	490	54.7	6.47	35	41	33	35	33	37	37	31	30	31	30	37	1		2.47753	2.33733	2.41837	2.57788	2.42715	2.5095	2.58609	2.43236	2.63191
	0.437842	0.0937481	1.06714	High	P02751	Fibronectin OS=Homo sapiens OX=9606	FN1			0.279005	0.578513	616.747	35	50	4581	50	2477	272.2	5.5	146	170	155	152	151	167	174	193	157	172	188	175	1		5.31918	5.2957	5.47972	5.33384	5.46123	5.58079	5.35137	5.51558	5.47071
	0.507097	0.0934683	1.06693	High	Q9HAU8	Aminopeptidase RNPEPL1 OS=Homo sapiens OX=9606	RNPEPL1			1.43563	0.126296	3.974	2	1	3	1	725	79.9	5.19	1		1					1					1		0.860177	0.848544	0.836226	1.10078	0.882849	0.841721	1.09052	1.03794	1.14491
	0.518797	0.0933584	1.06685	High	Q15084	Protein disulfide-isomerase A6 OS=Homo sapiens OX=9606	PDIA6			0.705295	0.291639	232.41	48	16	2287	16	440	48.1	5.08	102	118	128	119	120	127	126	122	120	137	133	136	1		5.46458	5.61151	5.62041	5.76216	5.55182	5.6626	5.77628	5.6224	5.77271
	0.173808	0.0927391	1.06639	High	Q9Y587	AP-4 complex subunit sigma-1 OS=Homo sapiens OX=9606	AP4S1			0.0692983	0.85661	4.731	7	1	23	1	144	17	5.19	1	2	3	4	1	2	2	3	1	1	2	1	1		-2.53672	-2.78343	-3.22641	-2.76883	-2.76731	-2.73221	-2.55263	-2.79937	-2.91691
	0.201114	0.0925668	1.06627	High	O00161	Synaptosomal-associated protein 23 OS=Homo sapiens OX=9606	SNAP23			0.1397	0.746827	48.906	46	6	278	6	211	23.3	5.01	10	7	8	6	7	7	11	9	8	10	8	9	1		0.251077	0.705127	0.79885	0.630876	0.617722	0.784157	0.697838	0.682843	0.709433
	1.08392	0.0923971	1.06614	High	Q14160	Protein scribble homolog OS=Homo sapiens OX=9606	SCRIB			0.740835	0.276827	126.511	23	22	713	22	1630	174.8	5.07	37	31	28	34	39	32	31	35	24	27	35	32	1		2.0689	1.99111	1.94426	2.12662	2.08432	2.07051	2.07995	2.02828	2.1948
	0.195541	0.0923818	1.06613	High	O60306	RNA helicase aquarius OS=Homo sapiens OX=9606	AQR			0.12469	0.76849	66.389	13	10	142	10	1485	171.2	6.37	9	6	6	6	6	6	5	7	9	4	3	5	1		-0.542953	-0.532144	-0.828286	-0.589723	-0.255827	-0.780687	-0.51432	-0.699035	-0.768999
	0.520244	0.0922661	1.06604	High	P49748	Very long-chain specific acyl-CoA dehydrogenase, mitochondrial OS=Homo sapiens OX=9606	ACADVL			0.824955	0.246886	149.846	45	24	1096	24	655	70.3	8.75	67	59	67	69	74	64	68	62	61	62	70	76	1		4.04322	3.91578	4.14007	4.20041	4.05141	4.12405	4.21943	4.11337	4.31101
	0.609774	0.0922394	1.06602	High	P62750	60S ribosomal protein L23a OS=Homo sapiens OX=9606	RPL23A			1.15233	0.170403	91.275	44	11	2262	11	156	17.7	10.45	35	40	38	38	36	47	37	43	33	45	38	35	1		4.32099	4.16165	4.32693	4.29037	4.43205	4.36387	4.43994	4.53456	4.39902
	0.54016	0.0922279	1.06602	High	Q9NTJ3	Structural maintenance of chromosomes protein 4 OS=Homo sapiens OX=9606	SMC4			0.604295	0.334125	119.329	23	22	520	22	1288	147.1	6.79	45	44	43	44	36	38	35	25	35	30	33	25	1		3.26987	3.14701	3.3713	3.43173	3.31314	3.32001	3.34078	3.45893	3.36016
	0.376393	0.0919444	1.06581	High	O14979	Heterogeneous nuclear ribonucleoprotein D-like OS=Homo sapiens OX=9606	HNRNPDL			1.74369	0.0941818	92.401	21	11	1793	9	420	46.4	9.57	46	49	44	37	35	42	38	48	44	39	60	39	1		0.555593	0.381621	0.459254	0.388446	0.59198	0.691875	0.766562	1.05926	0.853991
	0.781673	0.0915782	1.06554	High	P61619	Protein transport protein Sec61 subunit alpha isoform 1 OS=Homo sapiens OX=9606	SEC61A1			1.51065	0.11883	122.683	24	10	1401	8	476	52.2	8.06	47	53	47	50	49	55	62	58	57	56	59	58	1		3.00185	2.98402	2.91764	3.03495	3.15127	2.99203	3.2614	3.11261	3.1503
	0.147745	0.0915527	1.06552	High	Q13308	Inactive tyrosine-protein kinase 7 OS=Homo sapiens OX=9606	PTK7			0.123118	0.771159	86.952	18	10	241	10	1070	118.3	7.09	12	13	15	15	14	16	10	10	16	15	10	13	1		1.5538	1.42147	1.59293	1.27685	1.52598	2.04003	1.36455	1.65968	1.34439
	0.881085	0.0915349	1.0655	High	P62249	40S ribosomal protein S16 OS=Homo sapiens OX=9606	RPS16			1.42763	0.126167	64.379	49	8	2599	8	146	16.4	10.21	77	67	77	60	61	58	66	72	72	67	79	60	1		4.82814	4.80686	4.91969	4.87703	4.96363	4.98863	5.12987	5.09046	4.95026
	0.615832	0.0914809	1.06546	High	P35269	General transcription factor IIF subunit 1 OS=Homo sapiens OX=9606	GTF2F1			0.545191	0.367036	68.046	28	10	257	10	517	58.2	7.49	16	20	21	23	21	23	15	17	17	18	17	18	1	Met-loss+Acetyl [N-Term]	1.14792	1.08042	1.14318	1.16842	1.34018	1.13737	1.00483	1.20027	1.07631
	0.23655	0.091362	1.06538	High	Q15208	Serine/threonine-protein kinase 38 OS=Homo sapiens OX=9606	STK38			0.0813319	0.835711	23.487	22	6	55	6	465	54.2	7.15	8	2	7	4	3	2	7	6	5	4	3	4	1		-0.582435	-0.267152	-0.726754	-0.353381	-0.378942	-0.569931	-0.523884	-0.229417	-0.605457
	0.514998	0.0912889	1.06532	High	Q86TB9	Protein PAT1 homolog 1 OS=Homo sapiens OX=9606	PATL1			0.452504	0.423397	9.951	5	3	36	3	770	86.8	6.67	2	3	4	5	2	4		3	3	3	1	2	1		-1.65065	-1.79189	-1.53214	-1.57811	-1.59499	-1.52771	-1.57732	-1.7263	-1.73776
	0.281037	0.091135	1.06521	High	P49137	MAP kinase-activated protein kinase 2 OS=Homo sapiens OX=9606	MAPKAPK2			0.549389	0.364324	25.489	19	5	73	5	400	45.5	8.68	8	7	8	8	4	6	5	8	3	4	7	4	1		-0.534019	-0.744901	-0.668231	-0.65636	-0.32852	-0.688866	-0.725109	-0.685088	-0.892794
	0.225648	0.0911229	1.0652	High	Q13464	Rho-associated protein kinase 1 OS=Homo sapiens OX=9606	ROCK1			0.502453	0.391326	41.826	10	10	200	5	1354	158.1	5.9	21	17	17	18	16	11	13	11	15	9	13	12	1		-1.29646	-1.31695	-0.904626	-1.01703	-1.24674	-0.980902	-1.25285	-1.55133	-1.21367
	0.144924	0.0911198	1.0652	High	Q5MIZ7	Serine/threonine-protein phosphatase 4 regulatory subunit 3B OS=Homo sapiens OX=9606	PPP4R3B			0.0970461	0.808206	8.231	4	2	13	2	849	97.4	4.96	2	1	1	1	2		1	2		2	1		1		-4.73022	-4.3967	-4.83637	-4.52113	-4.91549	-4.25332	-4.36033	-4.91554	-4.90923
	1.2188	0.0907485	1.06492	High	Q01082	Spectrin beta chain, non-erythrocytic 1 OS=Homo sapiens OX=9606	SPTBN1			1.79401	0.0913825	983.356	55	95	6596	95	2364	274.4	5.57	169	170	161	168	174	178	183	168	205	209	176	194	1		4.91684	4.84774	4.93505	4.97994	5.03424	4.9577	5.31105	5.09379	5.1008
	0.592991	0.0907097	1.06489	High	Q9HD26	Golgi-associated PDZ and coiled-coil motif-containing protein OS=Homo sapiens OX=9606	GOPC			0.376371	0.486936	63.518	31	9	221	9	462	50.5	5.92	16	14	18	12	14	22	17	17	10	16	15	14	1		1.32714	1.25354	1.44318	1.43678	1.35986	1.49936	1.43353	1.32499	1.48816
	0.229513	0.0905507	1.06478	High	Q96RQ1	Endoplasmic reticulum-Golgi intermediate compartment protein 2 OS=Homo sapiens OX=9606	ERGIC2			0.0899293	0.819832	21.582	17	3	25	3	377	42.5	6.77	2	1	1	2	2	2	1	1	2	3	2	4	1		-1.33857	-1.23044	-0.879752	-1.17481	-0.937029	-1.06527	-1.20954	-1.25202	-0.944345
	0.248892	0.0905457	1.06477	High	Q8TEW0	Partitioning defective 3 homolog OS=Homo sapiens OX=9606	PARD3			0.240417	0.619745	6.471	2	2	8	2	1356	151.3	7.68		1	3	1	2						1		1		-2.68769	-2.8447	-2.8161	-2.46731	-2.93634	-2.67321	-2.66684	-2.70689	-2.58299
	0.809905	0.0905253	1.06476	High	Q08J23	RNA cytosine C(5)-methyltransferase NSUN2 OS=Homo sapiens OX=9606	NSUN2			0.982809	0.203281	109.757	35	17	571	17	767	86.4	6.77	27	28	28	25	25	28	22	29	21	23	30	23	1		1.1986	1.24171	1.23291	1.21496	1.3678	1.36203	1.1737	1.22962	1.21882
	0.277026	0.0899785	1.06435	High	Q9H446	RWD domain-containing protein 1 OS=Homo sapiens OX=9606	RWDD1			0.336547	0.521308	26.586	25	4	98	4	243	27.9	4.2	6	10	5	6	7	11	6	9	9	6	5	7	1		-0.935702	-0.926091	-0.614615	-0.849429	-0.767868	-0.589176	-0.653187	-0.714955	-0.684513
	0.754422	0.0896886	1.06414	High	Q92552	28S ribosomal protein S27, mitochondrial OS=Homo sapiens OX=9606	MRPS27			0.374859	0.488378	40.248	34	9	297	9	414	47.6	6.18	14	20	19	22	15	16	17	13	16	20	14	15	1		1.29466	1.31355	1.27272	1.46824	1.39683	1.28492	1.41436	1.2373	1.3963
	0.95594	0.0896721	1.06413	High	P50281	Matrix metalloproteinase-14 OS=Homo sapiens OX=9606	MMP14			0.700606	0.292792	21.639	9	5	164	5	582	65.9	7.77	11	10	10	12	8	8	10	10	13	12	14	11	1		0.471263	0.418649	0.535209	0.585969	0.508934	0.599234	0.568829	0.49429	0.659031
	1.05561	0.0896149	1.06409	High	P51553	Isocitrate dehydrogenase [NAD] subunit gamma, mitochondrial OS=Homo sapiens OX=9606	IDH3G			1.47384	0.123257	46.582	18	4	90	4	393	42.8	8.5	6	6	7	7	5	7	7	10	9	5	9	11	1		0.837895	0.900466	0.857911	1.02334	0.904945	0.936836	1.01525	0.990026	1.15437
	0.435709	0.0895004	1.064	High	Q13443	Disintegrin and metalloproteinase domain-containing protein 9 OS=Homo sapiens OX=9606	ADAM9			1.05456	0.188562	35.181	12	5	63	5	819	90.5	7.52	4	4	6	2	3	4	5	6	4	3	5	3	1		-0.657508	-0.55226	-0.842961	-0.555324	-0.594252	-0.634653	-0.56601	-0.410363	-0.371887
	0.260939	0.0893949	1.06392	High	Q9Y5B9	FACT complex subunit SPT16 OS=Homo sapiens OX=9606	SUPT16H			0.0918617	0.816849	65.224	17	12	516	12	1047	119.8	5.66	29	21	24	19	13	15	23	19	19	21	19	14	1		1.80964	1.68098	1.8313	1.65552	2.09735	1.83722	2.00711	1.71717	1.65257
	0.54706	0.0893714	1.06391	High	Q08426	Peroxisomal bifunctional enzyme OS=Homo sapiens OX=9606	EHHADH			1.41055	0.127302	21.135	10	4	67	4	723	79.4	9.14	7	5	6	8	5	4	8	7	2	3	3	7	1		-1.02717	-0.883245	-0.875058	-0.809339	-0.941616	-0.766407	-0.76269	-0.708144	-0.674664
	0.0532225	0.0892092	1.06379	High	Q9GZU1	Mucolipin-1 OS=Homo sapiens OX=9606	MCOLN1			0.172507	0.704516	11.595	9	2	10	2	580	65	7.24			1		1		2		1				1		-3.52464	-3.4821	-3.64616	-4.23124	-2.33658	-3.81745	-2.81622	-5.10487	-4.31296
	0.849099	0.089126	1.06373	High	Q14103	Heterogeneous nuclear ribonucleoprotein D0 OS=Homo sapiens OX=9606	HNRNPD			1.44143	0.125484	93.826	21	8	2358	6	355	38.4	7.81	68	68	60	57	57	64	65	75	77	66	93	63	1		3.37885	3.25528	3.33754	3.40539	3.36088	3.47278	3.43968	3.64127	3.53567
	0.458571	0.0889384	1.06359	High	O94822	E3 ubiquitin-protein ligase listerin OS=Homo sapiens OX=9606	LTN1			0.286612	0.571146	27.118	4	4	38	4	1766	200.4	6.25	4	4	3	4	3	1	2	1	3	1	3	2	1		-0.610387	-0.500075	-0.458911	-0.342795	-0.572723	-0.387039	-0.48048	-0.533135	-0.421974
	0.291295	0.088932	1.06358	High	O95674	Phosphatidate cytidylyltransferase 2 OS=Homo sapiens OX=9606	CDS2			0.109014	0.790423	17.546	13	3	47	3	445	51.4	7.09	3	6	3	4	4	5	5	5	3	2	1	6	1		-1.32707	-1.11885	-1.54398	-1.21427	-1.24837	-1.26047	-1.20376	-1.65144	-1.19217
	1.34589	0.0888971	1.06356	High	Q15165	Serum paraoxonase/arylesterase 2 OS=Homo sapiens OX=9606	PON2			1.50053	0.120104	150.247	60	10	574	10	354	39.4	5.6	24	26	24	26	27	32	19	26	24	36	29	32	1		3.27127	3.27069	3.22459	3.39419	3.33645	3.3026	3.39723	3.36735	3.53639
	0.522578	0.0888367	1.06351	High	P07942	Laminin subunit beta-1 OS=Homo sapiens OX=9606	LAMB1			1.14672	0.17088	115.459	15	19	810	19	1786	197.9	4.94	43	42	47	40	44	44	45	39	55	43	44	56	1		2.48067	2.43197	2.33363	2.60457	2.39418	2.51403	2.61753	2.56362	2.61128
	0.786381	0.088829	1.06351	High	Q13620	Cullin-4B OS=Homo sapiens OX=9606	CUL4B			0.624763	0.324851	73.729	19	14	299	11	913	103.9	7.37	24	25	18	18	24	28	22	19	18	24	21	21	1		1.31857	1.1678	1.31665	1.34639	1.38588	1.33722	1.24474	1.18399	1.34243
	0.215894	0.0886644	1.06339	High	Q9BRP4	Proteasomal ATPase-associated factor 1 OS=Homo sapiens OX=9606	PAAF1			0.0753657	0.84495	7.214	6	2	10	2	392	42.2	6.32	2		1	2	1	1	1		1	1			1		-1.69212	-2.21766	-1.80635	-1.80864	-1.81511	-1.82639	-1.67531	-1.93359	-1.94937
	0.88333	0.088267	1.06309	High	Q15043	Metal cation symporter ZIP14 OS=Homo sapiens OX=9606	SLC39A14			1.43802	0.125602	26.261	9	3	147	3	492	54.2	5.33	6	7	9	8	9	7	6	6	7	8	8	7	1		0.227744	0.229695	0.226384	0.369203	0.22344	0.355982	0.331537	0.396537	0.455187
	0.575623	0.0881329	1.06299	High	P05161	Ubiquitin-like protein ISG15 OS=Homo sapiens OX=9606	ISG15			0.423572	0.447842	7.897	18	2	41	2	165	17.9	7.44	1	2	2	4	4	3	2	1	3	1	2	6	1		-1.28871	-1.36692	-1.42434	-1.20376	-1.38225	-1.22956	-1.35099	-1.29932	-1.28186
	0.369107	0.0878989	1.06282	High	Q71UM5	40S ribosomal protein S27-like OS=Homo sapiens OX=9606	RPS27L			0.455186	0.421779	28.557	38	3	504	1	84	9.5	9.45	20	21	19	15	21	17	20	17	18	11	18	18	1		1.55839	1.3451	1.61501	1.57862	1.50515	1.69843	1.61385	1.63444	1.64925
	0.253855	0.0878525	1.06279	High	Q9UN70	Protocadherin gamma-C3 OS=Homo sapiens OX=9606	PCDHGC3			0.481354	0.40596	13.182	6	4	45	4	934	101	5.21	2	1	2	2	2	2	4	2	5	4	1	2	1		-0.635274	-1.01472	-0.832231	-0.833751	-0.574236	-0.81068	-0.861135	-0.966088	-0.958582
	0.488397	0.0876967	1.06267	High	P54819	Adenylate kinase 2, mitochondrial OS=Homo sapiens OX=9606	AK2			0.643223	0.315651	107.821	62	10	534	10	239	26.5	7.81	29	37	33	38	29	41	38	38	42	49	43	46	1		2.72283	2.95714	2.89474	2.99082	2.96935	2.87764	3.13469	2.8998	3.03706
	0.508464	0.0876465	1.06264	High	P04181	Ornithine aminotransferase, mitochondrial OS=Homo sapiens OX=9606	OAT			0.437651	0.434755	133.659	54	14	711	14	439	48.5	7.03	41	36	42	40	38	49	51	41	46	46	43	40	1		2.64977	2.77317	2.51902	2.76371	2.70273	2.73844	2.8039	2.71755	2.69718
	0.226969	0.0875168	1.06254	High	P57772	Selenocysteine-specific elongation factor OS=Homo sapiens OX=9606	EEFSEC			0.0660047	0.86178	3.664	3	1	4	1	596	65.3	8.35		1		1					1				1		-3.64713	-3.20838	-3.48838	-3.41569	-3.46185	-3.2038	-3.52543	-3.13228	-3.50085
	0.877756	0.0875079	1.06253	High	P16070	CD44 antigen OS=Homo sapiens OX=9606	CD44			1.94059	0.0780884	97.225	18	10	1176	10	742	81.5	5.33	20	22	20	19	19	20	27	23	32	24	24	25	1		3.62746	3.60929	3.523	3.60771	3.70057	3.714	3.74969	3.82538	3.76213
	0.278973	0.0874869	1.06252	High	Q6IN85	Serine/threonine-protein phosphatase 4 regulatory subunit 3A OS=Homo sapiens OX=9606	PPP4R3A			0.119166	0.776155	38.918	13	7	103	7	833	95.3	4.94	8	5	5	10	7	4	8	8	6	7	9	6	1		-0.654796	-0.323049	-0.388013	-0.320918	-0.514364	-0.268114	-0.521942	-0.254973	-0.388243
	0.606906	0.0874475	1.06249	High	Q9BRR6	ADP-dependent glucokinase OS=Homo sapiens OX=9606	ADPGK			0.636019	0.320277	64.755	44	10	231	10	497	54.1	6.2	15	16	18	19	18	18	16	18	15	18	15	15	1		1.49385	1.41723	1.51497	1.63266	1.44906	1.60668	1.6194	1.50711	1.69671
	0.18819	0.0874062	1.06246	High	Q86U42	Polyadenylate-binding protein 2 OS=Homo sapiens OX=9606	PABPN1			0.401614	0.464545	22.415	16	3	282	3	306	32.7	5.06	10	8	8	8	9	5	9	6	7	6	11	6	1		-0.71157	-0.97277	-1.23927	-0.854663	-0.747841	-1.05888	-0.828894	-0.710549	-0.734884
	0.188456	0.087382	1.06244	High	P29317	Ephrin type-A receptor 2 OS=Homo sapiens OX=9606	EPHA2			0.0722768	0.850916	20.758	6	5	142	5	976	108.2	6.23	6	8	4	8	7	12	9	8	8	12	6	10	1		-0.359828	-0.760957	-0.41409	-0.174979	-0.567541	-0.530209	-0.616112	-0.432433	-0.227789
	0.224675	0.0873712	1.06243	High	Q9Y680	Peptidyl-prolyl cis-trans isomerase FKBP7 OS=Homo sapiens OX=9606	FKBP7			0.169742	0.707145	23.533	20	5	81	5	222	25.8	6.32	5	1	4	3	4	1	4	2	7		3	2	1		-0.935229	-0.760356	-1.07234	-0.771873	-0.662497	-1.07144	-0.847473	-0.625566	-0.911871
	0.772144	0.0872466	1.06234	High	Q16643	Drebrin OS=Homo sapiens OX=9606	DBN1			0.573807	0.353041	188.107	53	21	1814	21	649	71.4	4.45	64	65	67	64	58	72	64	57	56	56	64	49	1	Met-loss+Acetyl [N-Term]	3.63758	3.52718	3.54546	3.57895	3.69223	3.70078	3.67646	3.6477	3.57337
	0.20432	0.0870317	1.06218	High	Q969M3	Protein YIPF5 OS=Homo sapiens OX=9606	YIPF5			0.302452	0.554754	6.461	5	1	43	1	257	28	4.36		1	2	2	1	3	2	2	1	3	2	5	1		-0.748992	-0.731891	-1.01641	-0.780406	-0.493847	-0.961948	-0.943016	-0.723325	-1.25504
	0.169911	0.0870171	1.06217	High	O15085	Rho guanine nucleotide exchange factor 11 OS=Homo sapiens OX=9606	ARHGEF11			0.36616	0.495561	4.477	1	1	30	1	1522	167.6	5.5	2	3	4	2	3	1	2	2	4	3	2	2	1		-4.12075	-4.23331	-4.7007	-4.16062	-4.21832	-4.41477	-4.39577	-4.48836	-4.59262
	1.10133	0.086963	1.06213	High	Q8N766	ER membrane protein complex subunit 1 OS=Homo sapiens OX=9606	EMC1			0.559172	0.360323	153.072	33	21	606	21	993	111.7	7.66	29	30	26	24	31	31	36	36	30	30	28	31	1		2.59594	2.56585	2.51607	2.60692	2.62919	2.70264	2.60002	2.60379	2.82382
	0.809104	0.0868791	1.06207	High	Q9NZW5	Protein PALS2 OS=Homo sapiens OX=9606	PALS2			1.84327	0.0857627	14.461	9	4	60	4	540	61.1	6.18	5	6	7	3	3	5	3	3	3	7	4	6	1		-0.86317	-0.844316	-0.782025	-0.673858	-0.732584	-0.822432	-0.644005	-0.672227	-0.632917
	0.40307	0.0866044	1.06187	High	Q8NEZ2	Vacuolar protein sorting-associated protein 37A OS=Homo sapiens OX=9606	VPS37A			0.86918	0.232466	9.505	5	1	33	1	397	44.3	5.57	3	1	2	4	2	3	4	5	2	2	2	2	1		-2.53875	-2.67522	-2.74576	-2.43118	-2.63933	-2.62941	-2.3611	-2.58175	-2.26536
	0.578603	0.0866019	1.06187	High	P08559	Pyruvate dehydrogenase E1 component subunit alpha, somatic form, mitochondrial OS=Homo sapiens OX=9606	PDHA1			0.258405	0.599388	97.582	38	11	451	11	390	43.3	8.06	23	28	19	23	23	28	35	22	26	27	25	33	1		2.12853	2.0742	2.1	2.18374	2.30162	2.07719	2.21684	2.03064	2.28702
	0.571328	0.0864677	1.06177	High	P18621	60S ribosomal protein L17 OS=Homo sapiens OX=9606	RPL17			0.646083	0.314459	125.168	49	10	1767	10	184	21.4	10.17	47	48	40	47	44	43	42	43	32	46	47	44	1		4.1777	4.08867	4.19268	4.1871	4.3572	4.17415	4.27752	4.32723	4.20631
	0.0849229	0.0864557	1.06176	High	Q9NZM3	Intersectin-2 OS=Homo sapiens OX=9606	ITSN2			0.214746	0.649783	4.949	1	1	3	1	1697	193.3	8.12	1						1					1	1		-4.27408	-3.82789	-3.90308	-3.46247	-3.71774	-4.56548	-4.16267	-4.2771	-4.20028
	0.131828	0.0863921	1.06171	High	Q92482	Aquaporin-3 OS=Homo sapiens OX=9606	AQP3			0.127078	0.765252	7.014	3	1	26	1	292	31.5	7.23			1										1		-3.26834	-3.1622	-3.85933	-3.55247	-3.26258	-3.21564	-3.55762	-3.10895	-3.07207
	0.286155	0.0862821	1.06163	High	O14936	Peripheral plasma membrane protein CASK OS=Homo sapiens OX=9606	CASK			0.101163	0.80246	19.54	6	4	100	4	926	105.1	6.43	3	6	4	4	4	9	9	7	7	3	3	7	1		-0.0918837	-0.296912	-0.0735102	-0.202994	-0.124071	0.123606	-0.208851	-0.200093	0.263186
	0.34622	0.0860437	1.06146	High	P38936	Cyclin-dependent kinase inhibitor 1 OS=Homo sapiens OX=9606	CDKN1A			0.403385	0.463345	33.997	37	3	146	3	164	18.1	8.37	9	8	8	8	10	6	8	7	6	9	7	6	1		1.58655	1.38076	1.24324	1.4918	1.53297	1.44392	1.41074	1.70228	1.57866
	0.364938	0.0859629	1.0614	High	P29992	Guanine nucleotide-binding protein subunit alpha-11 OS=Homo sapiens OX=9606	GNA11			0.123371	0.770875	37.4	28	7	210	3	359	42.1	5.69	13	14	11	13	12	18	13	14	13	14	11	15	1		0.115922	0.275558	-0.0593729	0.224366	0.202778	0.162851	0.337357	-0.0961599	0.440029
	0.0941518	0.0858008	1.06128	High	Q53ET0	CREB-regulated transcription coactivator 2 OS=Homo sapiens OX=9606	CRTC2			0.039438	0.912686	13.215	5	1	9	1	693	73.3	7.11	2	1	1	1	1	1	1					1	1		-4.06718	-5.07754	-4.4524	-4.7232	-4.28816	-4.32836	-4.52249	-4.67515	-4.47391
	0.594787	0.085708	1.06121	High	P36873	Serine/threonine-protein phosphatase PP1-gamma catalytic subunit OS=Homo sapiens OX=9606	PPP1CC			0.138128	0.749324	174.434	61	19	1472	3	323	37	6.54	54	66	65	66	58	68	65	73	76	73	71	63	1	Met-loss+Acetyl [N-Term]	-0.86901	-0.85856	-0.968507	-0.911548	-0.725163	-0.802242	-0.71261	-0.821141	-1.11531
	0.437253	0.0855865	1.06112	High	Q6ZUX7	LHFPL tetraspan subfamily member 2 protein OS=Homo sapiens OX=9606	LHFPL2			1.88776	0.0843246	15.2	11	1	26	1	228	24.5	6.49	1	1	1	1	1	1	1	1	1	1	1	1	1		-1.97651	-2.25389	-2.14281	-2.0323	-2.00209	-2.08207	-1.64775	-1.76357	-1.86924
	0.271253	0.0854747	1.06104	High	P19338	Nucleolin OS=Homo sapiens OX=9606	NCL			0.525511	0.379286	176.367	27	20	3963	20	710	76.6	4.7	115	116	123	119	120	101	129	112	130	112	135	105	1		5.94601	5.52953	5.66894	5.76479	5.77425	5.86187	5.99369	5.82157	5.90199
	0.702055	0.0852299	1.06086	High	P38117	Electron transfer flavoprotein subunit beta OS=Homo sapiens OX=9606	ETFB			0.408568	0.458817	48.907	38	10	896	10	255	27.8	8.1	54	58	66	55	50	57	47	52	41	52	56	49	1		3.3434	3.3777	3.47066	3.52313	3.40197	3.52235	3.53657	3.36062	3.66708
	0.0807232	0.0849756	1.06067	High	Q13426	DNA repair protein XRCC4 OS=Homo sapiens OX=9606	XRCC4			0.361145	0.500166	5.604	8	2	17	2	336	38.3	4.98	2	1	1	2	1	1	2	3	1	1			1		-2.27771	-2.65311	-3.13215	-2.90873	-2.85066	-2.04864	-3.07972	-2.98478	-2.94632
	1.1353	0.0848446	1.06057	High	Q02218	2-oxoglutarate dehydrogenase complex component E1 OS=Homo sapiens OX=9606	OGDH			2.41478	0.0604706	221.433	41	30	1593	30	1023	115.9	6.86	85	94	88	96	83	106	93	107	104	109	87	113	1		3.61786	3.61125	3.6861	3.74898	3.67176	3.74901	3.79932	3.81569	3.86878
	0.143792	0.084685	1.06046	High	Q96HR8	H/ACA ribonucleoprotein complex non-core subunit NAF1 OS=Homo sapiens OX=9606	NAF1			0.609705	0.331066	5.59	3	1	14	1	494	53.7	4.87		3	1	2	1	1	1	1	1		1	1	1		-3.35941	-3.1159	-3.72414	-3.53022	-3.08556	-3.32962	-4.0735	-3.68129	-3.44277
	0.382148	0.0846634	1.06044	High	Q9Y2A7	Nck-associated protein 1 OS=Homo sapiens OX=9606	NCKAP1			0.930271	0.21274	95.817	21	16	252	16	1128	128.7	6.62	28	18	18	22	19	16	22	16	9	13	15	13	1		4.46199	4.49311	4.42463	4.3729	4.68286	4.57796	4.65257	4.83868	4.60078
	0.607048	0.0843627	1.06022	High	Q8NI22	Multiple coagulation factor deficiency protein 2 OS=Homo sapiens OX=9606	MCFD2			0.379313	0.483872	89.841	68	5	243	5	146	16.4	4.63	14	12	14	15	11	19	14	15	10	15	16	16	1		1.74794	1.76119	1.78212	1.96457	1.7556	1.82416	1.8484	1.75721	2.08477
	0.375918	0.0842412	1.06013	High	Q9BQ69	ADP-ribose glycohydrolase MACROD1 OS=Homo sapiens OX=9606	MACROD1			0.462877	0.41712	31.238	18	4	111	4	325	35.5	9.51	7	9	7	6	7	7	7	8	8	6	7	9	1		0.509639	0.743571	0.684882	0.82965	0.746058	0.615108	0.749393	0.734694	0.836063
	1.00222	0.0841929	1.06009	High	P55084	Trifunctional enzyme subunit beta, mitochondrial OS=Homo sapiens OX=9606	HADHB			2.14906	0.0670448	176.521	53	17	1442	17	474	51.3	9.41	75	81	77	70	73	85	77	89	91	90	86	86	1		3.9745	4.10037	4.06686	4.11213	4.1525	4.12968	4.27167	4.20154	4.21818
	0.710633	0.0840995	1.06003	High	Q9Y613	FH1/FH2 domain-containing protein 1 OS=Homo sapiens OX=9606	FHOD1			0.32979	0.529364	43.653	13	9	101	9	1164	126.5	6.39	8	4	12	7	9	12	10	8	8	5	6	11	1		-0.659175	-0.561013	-0.495641	-0.437087	-0.505701	-0.520742	-0.388487	-0.553422	-0.585283
	1.22899	0.0840537	1.05999	High	P48735	Isocitrate dehydrogenase [NADP], mitochondrial OS=Homo sapiens OX=9606	IDH2			1.33973	0.137954	120.817	41	17	1254	16	452	50.9	8.69	75	80	79	79	75	88	84	83	81	87	88	89	1		3.80206	3.85663	3.87261	3.95925	3.88069	3.94352	3.9479	3.90004	3.98202
	0.866919	0.0838006	1.05981	High	P18615	Negative elongation factor E OS=Homo sapiens OX=9606	NELFE			0.512377	0.385971	9.913	9	3	44	3	380	43.2	9.33	5	4	2	4	5	5	4	4	1	2	2	3	1		-1.85458	-1.77718	-1.89117	-1.7722	-1.79977	-1.69956	-1.81161	-1.73313	-1.8738
	0.672408	0.0832691	1.05942	High	P13667	Protein disulfide-isomerase A4 OS=Homo sapiens OX=9606	PDIA4			1.08017	0.184027	312.052	58	31	4149	30	645	72.9	5.07	195	226	223	223	199	239	191	237	224	218	229	232	1		6.20799	6.24006	6.35624	6.40514	6.28948	6.35948	6.39985	6.36803	6.47502
	0.36684	0.0831954	1.05936	High	P21926	CD9 antigen OS=Homo sapiens OX=9606	CD9			0.977712	0.203675	20.427	15	2	72	2	228	25.4	7.15	6	6	5	7	6	7	7	5	5	5	3	5	1		-0.693469	-0.909535	-0.600471	-0.69962	-0.619108	-0.63516	-0.592785	-0.468766	-0.501268
	0.473974	0.0830447	1.05925	High	Q9H0C8	Integrin-linked kinase-associated serine/threonine phosphatase 2C OS=Homo sapiens OX=9606	ILKAP			0.936633	0.211251	44.352	32	9	220	9	392	42.9	7.09	23	18	20	17	24	16	22	14	10	10	13	12	1		2.03628	1.85762	2.07205	2.01949	2.14333	2.05225	2.31799	2.09576	2.16619
	0.876213	0.0829252	1.05916	High	P38571	Lysosomal acid lipase/cholesteryl ester hydrolase OS=Homo sapiens OX=9606	LIPA			0.332771	0.525946	21.601	13	3	123	3	399	45.4	6.92	7	6	9	7	5	9	9	10	9	9	6	9	1		0.0554399	-0.0441713	0.103881	0.133004	0.120365	0.110556	-0.0421391	0.254571	0.223051
	0.384	0.0826766	1.05898	High	P45954	Short/branched chain specific acyl-CoA dehydrogenase, mitochondrial OS=Homo sapiens OX=9606	ACADSB			0.262591	0.595739	27.8	16	5	124	5	432	47.5	6.99	11	4	13	5	9	16	8	13	10	14	9	12	1		-0.1349	0.0862627	-0.117944	0.0792589	-0.0851116	0.0873013	0.133583	-0.0436792	0.00891876
	0.348777	0.0826251	1.05894	High	O96011	Peroxisomal membrane protein 11B OS=Homo sapiens OX=9606	PEX11B			0.357686	0.502869	25.908	35	6	71	6	259	28.4	9.85	5	3	6	8	6	7	4	7	6	7	5	7	1		0.0295553	0.212422	0.111123	0.174771	0.354914	0.071291	0.237015	0.338113	0.150005
	0.145392	0.0822544	1.05867	High	Q96P47	Arf-GAP with GTPase, ANK repeat and PH domain-containing protein 3 OS=Homo sapiens OX=9606	AGAP3			0.120804	0.773972	17.882	6	3	54	3	875	95	7.97	3	3	2	5	5	5	4	1	6	6	2	6	1		-2.39761	-2.29835	-2.41727	-2.09389	-2.70247	-2.0701	-2.47101	-2.63715	-2.21345
	0.285041	0.0822519	1.05867	High	Q9Y276	Mitochondrial chaperone BCS1 OS=Homo sapiens OX=9606	BCS1L			0.554033	0.362296	54.33	27	7	188	7	419	47.5	8.5	10	10	11	13	16	15	18	11	16	18	16	20	1		0.0158854	0.36008	0.0783682	0.274838	0.28894	0.13731	0.244177	0.338687	0.429974
	1.24977	0.0820942	1.05855	High	P11047	Laminin subunit gamma-1 OS=Homo sapiens OX=9606	LAMC1			1.61503	0.10737	144.624	16	18	509	18	1609	177.5	5.12	21	27	31	31	29	29	32	25	25	17	21	22	1		2.31542	2.40386	2.31884	2.44858	2.42325	2.41257	2.42658	2.53747	2.49033
	0.116505	0.0820071	1.05849	High	P15848	Arylsulfatase B OS=Homo sapiens OX=9606	ARSB			0.225064	0.636814	8.751	6	2	10	2	533	59.6	8.21	1		2	1	1				1		3	1	1		-2.74073	-2.82735	-2.02715	-2.39932	-2.5173	-2.43259	-2.62278	-1.97295	-2.18791
	0.483821	0.0819728	1.05846	High	Q9NVA1	Ubiquinol-cytochrome-c reductase complex assembly factor 1 OS=Homo sapiens OX=9606	UQCC1			0.260076	0.598052	4.616	3	1	149	1	299	34.6	8.91	12	4	8	11	8	8	9	9	9	9	8	8	1		-1.6622	-1.67824	-1.80387	-1.55419	-1.74714	-1.59706	-1.7063	-1.69926	-1.36938
	0.360933	0.0818793	1.0584	High	Q969N2	GPI transamidase component PIG-T OS=Homo sapiens OX=9606	PIGT			1.41445	0.127842	70.438	27	12	252	12	578	65.7	8.38	14	17	15	14	16	20	16	16	17	15	15	17	1		1.21632	1.36996	1.33986	1.24378	1.52767	1.40033	1.5207	1.60263	1.61472
	0.273812	0.0817954	1.05833	High	Q9NZ43	Vesicle transport protein USE1 OS=Homo sapiens OX=9606	USE1			0.196442	0.673079	7.354	8	2	46	2	259	29.4	9.07	2	3	5	4	2	6	3	6	5	2	1	6	1		-1.29742	-1.38331	-1.04691	-1.13333	-1.28383	-1.06509	-1.34717	-1.20122	-1.22118
	1.38309	0.0816027	1.05819	High	P62269	40S ribosomal protein S18 OS=Homo sapiens OX=9606	RPS18			2.96546	0.0523944	49.235	53	9	1437	9	152	17.7	10.99	35	37	46	44	37	47	41	51	63	55	51	52	1	Met-loss+Acetyl [N-Term]	4.83781	4.8225	4.86508	4.87901	4.96379	4.92739	5.06175	5.0029	5.06772
	0.234917	0.0815932	1.05819	High	Q8NBK3	Formylglycine-generating enzyme OS=Homo sapiens OX=9606	SUMF1			0.0561177	0.88002	9.145	8	2	22	2	374	40.5	6.65	2	1	2		2		2	2	2		1	2	1		-2.99987	-2.96886	-3.04177	-2.93256	-3.14999	-2.68318	-2.76987	-3.23545	-2.89599
	0.817686	0.0814546	1.05808	High	Q8IWE2	Protein NOXP20 OS=Homo sapiens OX=9606	FAM114A1			1.07269	0.18633	119.833	45	15	376	15	563	60.7	4.68	26	36	27	27	35	24	19	21	20	21	21	24	1		2.63407	2.59568	2.71436	2.77412	2.67223	2.74213	2.73393	2.75816	2.86497
	0.174271	0.0813503	1.05801	High	Q9HCU5	Prolactin regulatory element-binding protein OS=Homo sapiens OX=9606	PREB			0.480715	0.40624	30.452	20	5	39	5	417	45.4	7.88	2	4	2	3	3	7	2	5	3	3	2	3	1		-1.64228	-1.53786	-1.48623	-1.35369	-1.8112	-1.25742	-1.35502	-1.3778	-1.20523
	1.33032	0.0812651	1.05795	High	Q9BX67	Junctional adhesion molecule C OS=Homo sapiens OX=9606	JAM3			0.985939	0.203143	9.576	9	3	91	3	310	35	7.59	6	3	4	3	6	5	5	7	9	7	4	5	1		0.944083	0.870208	0.963592	1.01291	1.00539	1.00338	0.961151	1.0273	1.11609
	0.27439	0.0809078	1.05768	High	Q96JB5	CDK5 regulatory subunit-associated protein 3 OS=Homo sapiens OX=9606	CDK5RAP3			0.153227	0.729329	52.62	24	10	215	10	506	56.9	4.75	12	14	8	11	18	18	15	16	13	13	12	16	1		0.871203	0.773248	0.802632	0.956086	1.05873	0.674994	0.92487	0.858598	0.853901
	0.40812	0.0808582	1.05765	High	Q92520	Protein FAM3C OS=Homo sapiens OX=9606	FAM3C			0.400257	0.465458	19.311	26	5	189	5	227	24.7	8.29	14	10	9	19	19	19	12	14	13	19	11	12	1		0.57393	0.748214	0.849401	0.776467	0.853472	0.78418	0.688484	0.66167	0.760868
	0.410577	0.0808455	1.05764	High	Q9UBW8	COP9 signalosome complex subunit 7a OS=Homo sapiens OX=9606	COPS7A			0.538311	0.370206	46.073	44	7	184	7	275	30.3	8.22	10	14	15	13	16	16	11	12	13	13	14	12	1		1.11859	1.01487	1.2738	1.20569	1.15944	1.28466	1.23895	1.2309	1.30311
	0.739384	0.0806274	1.05748	High	Q9UBC2	Epidermal growth factor receptor substrate 15-like 1 OS=Homo sapiens OX=9606	EPS15L1			0.315958	0.542528	40.465	15	9	238	9	864	94.2	5.11	16	20	18	17	13	16	21	17	15	14	17	16	1		0.815269	0.74628	0.85823	0.811376	0.925148	0.925137	0.742298	0.941199	0.89579
	0.435115	0.0805511	1.05742	High	O43402	ER membrane protein complex subunit 8 OS=Homo sapiens OX=9606	EMC8			0.17949	0.694213	18.264	28	4	34	4	210	23.8	6.4	2	2	3	4	5	5		2	4	3	1	2	1		-0.26831	-0.143016	-0.015666	-0.0137148	-0.0515232	-0.1201	-0.11747	-0.221372	0.0168819
	0.211905	0.0805467	1.05742	High	Q8N0U8	Vitamin K epoxide reductase complex subunit 1-like protein 1 OS=Homo sapiens OX=9606	VKORC1L1			0.313894	0.544038	13.49	22	3	64	3	176	19.8	9.13	5	1	6	6	5	5	4	6	4	1	2	6	1		-1.12562	-0.733241	-1.12752	-0.840396	-1.04953	-0.854818	-0.905272	-0.720016	-0.866745
	0.496459	0.0803146	1.05725	High	O75251	NADH dehydrogenase [ubiquinone] iron-sulfur protein 7, mitochondrial OS=Homo sapiens OX=9606	NDUFS7			2.40091	0.0600457	14.726	15	4	268	4	213	23.5	9.99	9	6	5	10	9	9	11	10	11	8	14	11	1		0.00318813	-0.110599	-0.23319	-0.0173941	-0.0130062	-0.0692558	0.212696	0.241052	0.176067
	0.542608	0.0800756	1.05707	High	P08708	40S ribosomal protein S17 OS=Homo sapiens OX=9606	RPS17			0.90657	0.218449	123.402	55	9	1307	9	135	15.5	9.85	37	37	41	45	43	53	42	42	39	45	36	40	1		4.11907	4.14445	4.15531	4.0976	4.31575	4.24571	4.25674	4.32956	4.2515
	0.674863	0.0800667	1.05707	High	O60313	Dynamin-like 120 kDa protein, mitochondrial OS=Homo sapiens OX=9606	OPA1			0.711651	0.289846	90.254	26	19	459	19	960	111.6	7.87	34	33	40	40	39	34	38	43	28	34	33	29	1		2.41945	2.50309	2.47273	2.54331	2.46295	2.62922	2.53591	2.5453	2.55317
	0.098227	0.0799529	1.05698	High	Q8WVX9	Fatty acyl-CoA reductase 1 OS=Homo sapiens OX=9606	FAR1			0.63363	0.321797	27.611	19	6	53	6	515	59.3	9.17	4	3	2	2	6	4	7	3	6	2	3	2	1		-1.38463	-1.31406	-1.5905	-1.16432	-0.98554	-1.89948	-0.961729	-0.813415	-1.14763
	0.279557	0.0799141	1.05696	High	Q15041	ADP-ribosylation factor-like protein 6-interacting protein 1 OS=Homo sapiens OX=9606	ARL6IP1			0.285507	0.572048	9.913	5	1	71	1	203	23.3	9.32	5	3	8	7	6	6	4	3	6	6	4	3	1		1.06744	1.32951	1.03156	1.20285	1.34634	1.11905	1.21311	1.00505	1.06646
	0.205884	0.0798817	1.05693	High	Q9Y4P1	Cysteine protease ATG4B OS=Homo sapiens OX=9606	ATG4B			0.156894	0.725792	10.689	8	2	19	2	393	44.3	5.07	2	4	2			2	1	2	2	1	1	2	1		-2.24581	-1.98117	-2.41473	-2.13428	-1.99351	-2.27427	-2.76946	-1.71068	-2.7055
	0.226176	0.0798791	1.05693	High	Q7Z2K6	Endoplasmic reticulum metallopeptidase 1 OS=Homo sapiens OX=9606	ERMP1			0.12495	0.768276	13.146	5	3	21	3	904	100.2	7.52	3			1	3	3	2		1	2	2	3	1		-0.0547438	-0.0311518	0.0678034	-0.000624657	-0.10993	0.3321	0.0794983	0.0297632	-0.160013
	0.843488	0.0795797	1.05671	High	P09486	SPARC OS=Homo sapiens OX=9606	SPARC			1.27558	0.146816	169.648	56	13	2213	13	303	34.6	4.84	91	109	103	105	104	103	112	109	104	121	117	117	1		5.22049	5.17294	5.26449	5.27359	5.25516	5.36791	5.33145	5.37346	5.53267
	0.472651	0.0793559	1.05655	High	Q9H9F9	Actin-related protein 5 OS=Homo sapiens OX=9606	ACTR5			0.519664	0.380874	5.9	5	2	12	2	607	68.3	5.27	1			1			1			1	1	1	1		1.11015	0.97915	1.1735	1.13669	1.10878	1.25541	1.25893	1.11154	1.25261
	1.14617	0.0793133	1.05652	High	Q99798	Aconitate hydratase, mitochondrial OS=Homo sapiens OX=9606	ACO2			1.64373	0.105116	213.483	46	27	1043	27	780	85.4	7.61	67	63	72	65	67	63	65	69	62	60	63	77	1		3.80892	3.78376	3.82723	3.9234	3.82662	3.90783	3.89559	3.91527	3.95738
	0.259293	0.0793006	1.05651	High	Q9Y3B7	39S ribosomal protein L11, mitochondrial OS=Homo sapiens OX=9606	MRPL11			0.475418	0.409941	13.448	19	3	30	3	192	20.7	9.91	3		3	2	2	1	2	2	4	6	1	1	1		-1.17512	-0.870296	-1.06662	-1.02098	-0.793739	-1.05941	-0.91959	-0.821544	-0.87326
	0.979064	0.0792306	1.05645	High	Q9Y5M8	Signal recognition particle receptor subunit beta OS=Homo sapiens OX=9606	SRPRB			1.36443	0.133975	41.581	27	8	435	8	271	29.7	9.04	24	22	20	26	24	25	27	29	24	28	24	29	1		1.99706	1.99101	2.05107	2.15717	2.05188	2.06777	2.13994	2.12515	2.27861
	0.294603	0.0792287	1.05645	High	P34059	N-acetylgalactosamine-6-sulfatase OS=Homo sapiens OX=9606	GALNS			0.202813	0.663844	13.796	4	2	42	2	522	58	6.74	3	2	2	3	2	3	2	1	2	3	1	3	1		-1.48075	-1.58156	-1.32135	-1.25581	-1.52551	-1.36466	-1.47085	-1.56833	-1.38277
	0.905918	0.0791995	1.05643	High	Q7Z478	ATP-dependent RNA helicase DHX29 OS=Homo sapiens OX=9606	DHX29			1.616	0.107775	95.383	17	17	501	16	1369	155.1	8.09	9	5	13	8	14	7	9	6	10	9	11	8	1		1.1511	1.18819	1.28424	1.27216	1.30474	1.28422	1.59965	1.33471	1.48503
	1.00083	0.0791423	1.05639	High	P49755	Transmembrane emp24 domain-containing protein 10 OS=Homo sapiens OX=9606	TMED10			0.365367	0.496564	55.063	32	6	741	6	219	25	7.44	27	31	32	30	30	28	37	32	38	39	29	32	1		3.78896	3.79827	3.80822	3.94831	3.82533	3.85924	3.95458	3.73291	3.98131
	0.537304	0.0790176	1.0563	High	Q9NUQ9	CYFIP-related Rac1 interactor B OS=Homo sapiens OX=9606	CYRIB			0.520026	0.381174	51.121	38	8	165	7	324	36.7	6.06	13	12	15	14	13	10	12	12	14	10	10	16	1		2.15434	2.09387	2.18213	2.10707	2.25556	2.30477	2.23661	2.28297	2.18494
	0.690903	0.0789146	1.05622	High	Q9NRX4	14 kDa phosphohistidine phosphatase OS=Homo sapiens OX=9606	PHPT1			1.39078	0.128197	51.277	26	2	155	2	125	13.8	6.07	14	11	13	13	13	11	6	9	13	10	12	7	1		1.63353	1.57481	1.51222	1.63266	1.72666	1.59798	1.6916	1.81241	1.73655
	0.420306	0.0788987	1.05621	High	P50914	60S ribosomal protein L14 OS=Homo sapiens OX=9606	RPL14			0.529527	0.376924	49.214	25	5	1539	5	215	23.4	10.93	34	32	30	39	41	45	51	49	52	47	47	42	1		3.79077	3.71112	3.79059	3.75241	3.99294	3.78382	3.87732	3.9872	3.82264
	0.26246	0.0788714	1.05619	High	Q96CP2	FLYWCH family member 2 OS=Homo sapiens OX=9606	FLYWCH2			0.193045	0.676777	7.826	28	2	12	2	140	14.6	8.46	3	1	1	1				2	1			1	1		0.295922	0.126945	-0.0865011	0.108483	0.267752	0.196745	0.165672	0.244082	0.193972
	0.973139	0.0786985	1.05606	High	Q00341	Vigilin OS=Homo sapiens OX=9606	HDLBP			0.574271	0.352936	316.495	38	40	2285	39	1268	141.4	6.87	76	81	70	81	77	90	80	80	70	87	69	76	1	Met-loss+Acetyl [N-Term]	4.14679	4.08562	4.09283	4.16374	4.25152	4.14607	4.17926	4.1674	4.05947
	0.163776	0.0786082	1.056	High	Q9P0J7	E3 ubiquitin-protein ligase KCMF1 OS=Homo sapiens OX=9606	KCMF1			0.171065	0.706087	9.115	11	2	42	2	381	41.9	5.66	1	3	3	2	4	2	3	2	3	1	3	2	1		-2.94872	-2.57277	-2.7783	-2.51461	-2.57499	-2.97437	-2.69026	-2.962	-2.85444
	0.882216	0.0785993	1.05599	High	P49454	Centromere protein F OS=Homo sapiens OX=9606	CENPF			0.663955	0.307397	9.477	1	3	14	3	3114	357.3	5.1		2		1		1			1		1	1	1		0.59232	0.550855	0.668622	0.668324	0.727676	0.651594	0.615437	0.616599	0.689796
	0.480695	0.0785878	1.05598	High	O14734	Acyl-coenzyme A thioesterase 8 OS=Homo sapiens OX=9606	ACOT8			1.54543	0.115164	16.241	21	4	45	4	319	35.9	7.56	3	4	3	4	2	1	3	5	4	1		3	1		0.00944805	0.00531101	-0.0424414	0.2058	0.0196228	-0.0173416	0.261723	0.183192	0.19681
	0.0377659	0.078537	1.05595	High	Q8IWW6	Rho GTPase-activating protein 12 OS=Homo sapiens OX=9606	ARHGAP12			0.373063	0.489346	18.758	5	2	32	2	846	96.2	7.61	4	3	4	2	3	2	2	2	4	3	2	1	1		-2.33123	-1.33852	-2.86437	-2.17316	-1.11975	-3.00561	-1.99116	-4.37648	-2.99688
	0.843592	0.0784664	1.0559	High	P16435	NADPH--cytochrome P450 reductase OS=Homo sapiens OX=9606	POR			1.61666	0.108064	190.85	49	25	1407	25	677	76.6	5.58	87	77	88	80	89	94	91	90	75	81	85	100	1		3.96675	4.11023	4.0498	4.1282	4.09794	4.13604	4.23993	4.14685	4.25193
	0.628391	0.0784582	1.05589	High	O43156	TELO2-interacting protein 1 homolog OS=Homo sapiens OX=9606	TTI1			0.563377	0.358526	23.745	5	3	68	3	1089	122	5.97	6	6	7	4	7	4	5	4	5	6	5	6	1		-1.17831	-1.0891	-1.0341	-1.03815	-0.950829	-1.07715	-1.06671	-1.24791	-1.09483
	0.381662	0.0784403	1.05588	High	Q9UHL4	Dipeptidyl peptidase 2 OS=Homo sapiens OX=9606	DPP7			0.304159	0.553119	68.34	36	10	196	10	492	54.3	6.32	13	13	16	13	14	13	17	11	18	11	10	12	1		0.90632	1.00441	0.774981	0.9057	1.083	0.932335	0.915157	0.977271	1.07432
	0.313126	0.0783386	1.0558	High	O75427	Leucine-rich repeat and calponin homology domain-containing protein 4 OS=Homo sapiens OX=9606	LRCH4			1.36325	0.133951	26.258	12	4	31	4	683	73.4	8.22	2	3	2	2	1	3	2	2	3	5	1	3	1		-2.03162	-1.7062	-1.88732	-1.8149	-1.72036	-1.85487	-2.13326	-2.28961	-1.99799
	0.240833	0.0783367	1.0558	High	Q13057	Bifunctional coenzyme A synthase OS=Homo sapiens OX=9606	COASY			0.14612	0.737394	35.929	12	5	177	5	564	62.3	6.99	14	10	16	13	10	9	9	7	14	8	12	6	1		1.23722	1.55105	1.54034	1.40114	1.66362	1.49887	1.45531	1.45693	1.42614
	0.16587	0.0782445	1.05573	High	P09012	U1 small nuclear ribonucleoprotein A OS=Homo sapiens OX=9606	SNRPA			0.0657459	0.862156	53.437	23	5	332	4	282	31.3	9.83	5	3	6	6	3	6	5	2	2	2	6	5	1		-0.0214586	-0.407573	-0.389888	-0.409232	0.0254726	-0.200426	-0.174335	0.0132818	-0.392153
	0.535107	0.0782255	1.05572	High	P59998	Actin-related protein 2/3 complex subunit 4 OS=Homo sapiens OX=9606	ARPC4			0.916913	0.215924	114.128	61	9	1474	9	168	19.7	8.43	67	74	74	75	69	71	65	74	70	81	71	64	1		3.93872	3.86598	3.88226	4.0918	3.89087	3.93897	4.09475	4.02238	3.99793
	0.550978	0.0782115	1.05571	High	P62318	Small nuclear ribonucleoprotein Sm D3 OS=Homo sapiens OX=9606	SNRPD3			0.982332	0.203337	41.434	48	4	386	4	126	13.9	10.32	14	16	15	11	12	13	12	11	11	12	8	10	1		1.78886	1.84752	1.78566	1.76691	1.95356	1.93619	2.10031	1.96938	1.89904
	0.105293	0.0781422	1.05566	High	Q6P1N9	Deoxyribonuclease TATDN1 OS=Homo sapiens OX=9606	TATDN1			0.0742942	0.846949	6.682	11	2	8	2	297	33.6	6.96		2	3	1			1		1				1		-3.21629	-2.37616	-2.69572	-2.84871	-2.48162	-2.72342	-3.36869	-2.72116	-2.50417
	0.631715	0.0780773	1.05561	High	P06756	Integrin alpha-V OS=Homo sapiens OX=9606	ITGAV			1.43387	0.125785	118.116	23	18	938	18	1048	116	5.68	48	55	54	49	50	50	46	44	51	45	42	53	1		3.06249	3.0124	3.18191	3.1315	3.21045	3.14908	3.29251	3.20288	3.33054
	0.524015	0.0779476	1.05552	High	P00736	Complement C1r subcomponent OS=Homo sapiens OX=9606	C1R			0.622883	0.325666	39.055	16	6	103	6	705	80.1	6.21	5	5	7	5	5	4	7	3	4	4	6	6	1		-0.696754	-0.616477	-0.636989	-0.687762	-0.546932	-0.481682	-0.667675	-0.372781	-0.320631
	0.270418	0.0777327	1.05536	High	Q9BRX5	DNA replication complex GINS protein PSF3 OS=Homo sapiens OX=9606	GINS3			0.193209	0.676758	5.859	8	2	33	2	216	24.5	5.34	3	3	4	4	3	4	1	2	3	1	2	3	1		-1.53203	-1.51379	-1.68404	-1.29601	-1.61228	-1.58838	-1.65607	-1.28645	-1.4114
	0.892053	0.0776946	1.05533	High	Q9UBR2	Cathepsin Z OS=Homo sapiens OX=9606	CTSZ			1.64058	0.105446	47.638	24	6	364	6	303	33.8	7.11	16	14	17	22	17	16	18	21	17	20	22	23	1		2.44146	2.31303	2.42165	2.48237	2.47016	2.4567	2.49216	2.58971	2.58928
	1.44682	0.0775935	1.05526	High	P33993	DNA replication licensing factor MCM7 OS=Homo sapiens OX=9606	MCM7			1.60903	0.108669	160.211	42	24	1316	24	719	81.3	6.46	57	71	77	74	68	73	68	75	63	60	67	68	1		3.66073	3.72056	3.73969	3.79917	3.77477	3.77982	3.75022	3.76424	3.76001
	0.655646	0.0774937	1.05518	High	Q99714	3-hydroxyacyl-CoA dehydrogenase type-2 OS=Homo sapiens OX=9606	HSD17B10			0.956284	0.207936	85.986	56	9	592	9	261	26.9	7.78	27	36	32	29	36	40	35	34	30	33	28	35	1		2.65117	2.63784	2.69064	2.83906	2.67791	2.69516	2.98616	2.69446	2.96129
	0.456608	0.0773799	1.0551	High	O95831	Apoptosis-inducing factor 1, mitochondrial OS=Homo sapiens OX=9606	AIFM1			0.62864	0.323541	100.081	28	13	628	13	613	66.9	8.95	37	32	29	40	36	38	28	46	40	44	37	43	1		2.57609	2.53833	2.66978	2.73462	2.54857	2.73315	2.70542	2.66867	2.79755
	0.24229	0.0773207	1.05506	High	Q8WWI5	Choline transporter-like protein 1 OS=Homo sapiens OX=9606	SLC44A1			0.459898	0.419029	13.289	5	2	119	2	657	73.3	8.6	6	9	7	14	9	6	7	7	8	9	10	11	1		-1.34215	-1.22197	-1.55868	-1.22323	-1.21388	-1.45373	-1.01263	-0.975184	-1.41387
	0.231869	0.0771917	1.05496	High	P01889	HLA class I histocompatibility antigen, B alpha chain OS=Homo sapiens OX=9606	HLA-B			0.307232	0.551145	66.539	25	6	458	1	362	40.4	5.85	25	28	25	30	27	27	26	31	23	28	27	26	1		0.509925	0.390355	0.36836	0.583955	0.658384	0.257875	0.568905	0.751973	0.439444
	0.131113	0.0771166	1.05491	High	P04732	Metallothionein-1E OS=Homo sapiens OX=9606	MT1E			0.591642	0.34204	5.187	33	1	18	1	61	6	7.96	2				2								1	Acetyl [N-Term]	-3.64937	-4.3498	-4.08278	-4.02414	-4.01929	-3.80716	-4.59475	-4.2608	-4.11175
	0.407823	0.076882	1.05474	High	Q15738	Sterol-4-alpha-carboxylate 3-dehydrogenase, decarboxylating OS=Homo sapiens OX=9606	NSDHL			0.914848	0.216726	88.083	36	8	513	8	373	41.9	8.06	27	32	33	35	30	41	37	36	34	33	33	38	1		1.58593	1.82442	1.68534	1.83941	1.70122	1.78571	1.88742	1.85125	1.84725
	0.617602	0.0768617	1.05472	High	O95340	Bifunctional 3'-phosphoadenosine 5'-phosphosulfate synthase 2 OS=Homo sapiens OX=9606	PAPSS2			0.352235	0.507321	73.662	29	11	249	11	614	69.5	8.03	18	21	17	24	18	18	17	20	22	14	19	19	1		1.63417	1.56774	1.5451	1.72403	1.56288	1.69068	1.65763	1.53044	1.65031
	0.420394	0.0767943	1.05467	High	P05388	60S acidic ribosomal protein P0 OS=Homo sapiens OX=9606	RPLP0			1.29948	0.143995	104.384	51	13	1789	13	317	34.3	5.97	32	55	40	50	33	40	38	49	44	63	44	45	1		3.85747	3.6761	3.93704	3.88363	3.91833	3.89903	4.10434	4.05356	3.97797
	0.289145	0.0767943	1.05467	High	O75439	Mitochondrial-processing peptidase subunit beta OS=Homo sapiens OX=9606	PMPCB			0.237896	0.622627	54.955	36	12	300	12	489	54.3	6.83	13	17	16	18	21	26	17	16	17	19	17	23	1		1.61449	1.72799	1.92528	1.86088	1.72252	1.91474	1.91818	1.72075	1.97955
	0.361981	0.0765661	1.05451	High	O95140	Mitofusin-2 OS=Homo sapiens OX=9606	MFN2			1.02264	0.19617	12.169	7	3	27	3	757	86.3	6.98	5	2	3	2	2	1	2	1	3	2	3	1	1		-2.25762	-2.4979	-2.31566	-2.33564	-2.32613	-2.1797	-2.41689	-2.52044	-2.5173
	0.349294	0.0765273	1.05448	High	Q9H3N1	Thioredoxin-related transmembrane protein 1 OS=Homo sapiens OX=9606	TMX1			0.230032	0.631418	31.781	19	6	391	6	280	31.8	4.98	27	29	25	19	25	23	23	30	23	32	29	26	1		2.66158	2.87175	2.80203	2.7978	2.98796	2.77918	2.81241	2.7471	2.81274
	0.20797	0.0764936	1.05445	High	Q5RI15	Cytochrome c oxidase assembly protein COX20, mitochondrial OS=Homo sapiens OX=9606	COX20			0.328277	0.530713	19.43	55	4	78	4	118	13.3	8.76	4	4	4	5	6	7	3	5	7	6	5	5	1	Met-loss+Acetyl [N-Term]	-0.281976	-0.0168867	-0.254117	-0.12802	0.100382	-0.29586	0.0148602	-0.0892439	-0.010519
	1.13367	0.076306	1.05432	High	P04843	Dolichyl-diphosphooligosaccharide--protein glycosyltransferase subunit 1 OS=Homo sapiens OX=9606	RPN1			2.45178	0.0631688	289.685	56	26	3798	26	607	68.5	6.38	102	116	110	116	114	117	112	122	123	121	114	142	1		5.3657	5.35005	5.33752	5.47636	5.43468	5.37115	5.49972	5.49741	5.53348
	0.229604	0.0762545	1.05428	High	Q14677	Clathrin interactor 1 OS=Homo sapiens OX=9606	CLINT1			0.280475	0.576987	70.68	20	9	363	9	625	68.2	6.42	16	19	15	17	21	22	14	16	13	12	14	14	1		1.43993	1.34505	1.76525	1.64598	1.5548	1.57822	1.64315	1.52982	1.84748
	1.38897	0.0754585	1.0537	High	Q08209	Protein phosphatase 3 catalytic subunit alpha OS=Homo sapiens OX=9606	PPP3CA			1.44946	0.125095	67.281	25	7	326	4	521	58.7	5.86	15	17	18	19	13	18	19	23	17	16	18	13	1		1.04368	1.01416	1.04585	1.10586	1.15211	1.0721	0.995609	1.06488	1.00641
	0.641093	0.0749633	1.05333	High	Q10471	Polypeptide N-acetylgalactosaminyltransferase 2 OS=Homo sapiens OX=9606	GALNT2			1.11677	0.177231	160.123	43	20	1185	19	571	64.7	8.35	61	58	55	61	57	56	66	65	60	65	61	74	1		3.67748	3.65955	3.5571	3.74423	3.63208	3.74273	3.82208	3.71141	3.92716
	0.797487	0.0749308	1.05331	High	Q96P70	Importin-9 OS=Homo sapiens OX=9606	IPO9			0.997391	0.199747	79.372	19	11	268	11	1041	115.9	4.81	24	22	21	16	18	19	22	20	15	11	9	21	1	Met-loss+Acetyl [N-Term]	1.39369	1.31895	1.38536	1.49076	1.46199	1.37004	1.2895	1.36449	1.35943
	0.212076	0.0748094	1.05322	High	Q13243	Serine/arginine-rich splicing factor 5 OS=Homo sapiens OX=9606	SRSF5			0.0979052	0.806684	25.412	18	4	354	3	272	31.2	11.59	12	6	7	9	7	8	11	7	10	11	11	10	1		-1.65804	-1.92656	-1.63251	-1.85437	-1.51893	-1.61937	-1.58471	-1.65853	-1.77242
	0.333725	0.0746962	1.05314	High	P61457	Pterin-4-alpha-carbinolamine dehydratase OS=Homo sapiens OX=9606	PCBD1			0.28753	0.570073	3.737	10	1	8	1	104	12	6.8	1				1	1	1		1	1	1	1	1		-1.46029	-1.68512	-1.43374	-1.42946	-1.54098	-1.38462	-1.3837	-1.63786	-1.76822
	0.893912	0.0746269	1.05309	High	Q14697	Neutral alpha-glucosidase AB OS=Homo sapiens OX=9606	GANAB			1.63127	0.106495	633.188	62	42	5075	42	944	106.8	6.14	223	254	242	247	282	285	262	294	292	311	286	300	1		6.5403	6.51196	6.53972	6.676	6.54685	6.59301	6.6863	6.63984	6.75852
	1.19824	0.0744336	1.05295	High	Q9Y4L1	Hypoxia up-regulated protein 1 OS=Homo sapiens OX=9606	HYOU1			0.813285	0.251788	244.917	41	30	2091	30	999	111.3	5.22	96	119	101	114	120	125	116	106	116	120	118	135	1		4.87058	4.83248	4.92761	4.96317	4.93275	4.95805	4.93093	4.91454	5.04498
	0.167229	0.0743834	1.05291	High	P07204	Thrombomodulin OS=Homo sapiens OX=9606	THBD			0.331338	0.527573	5.548	3	1	12	1	575	60.3	4.92	1	1	1	1	1	1	1	1	1	1	1	1	1		-3.5774	-3.40859	-3.33621	-3.55072	-3.06531	-3.48301	-3.49994	-3.93166	-3.40288
	0.250099	0.0743599	1.05289	High	A0A1B0GTQ4	Protein myomixer OS=Homo sapiens OX=9606	MYMX			0.600594	0.336032	15.913	39	3	97	3	84	9.6	11.44	3	5	5	7	4	8	8	9	4	5	8	9	1		-1.23413	-1.1127	-1.01612	-0.885392	-1.02618	-1.2283	-0.908936	-1.04819	-0.738297
	0.136442	0.0741844	1.05277	High	Q9UPN4	Centrosomal protein of 131 kDa OS=Homo sapiens OX=9606	CEP131			2.14991	0.0675489	9.07	3	3	8	3	1083	122.1	8.69													1		-4.65786	-5.21179	-4.69351	-4.62382	-4.77853	-4.93826	-4.22465	-3.91815	-3.90786
	0.532321	0.0741367	1.05273	High	P46934	E3 ubiquitin-protein ligase NEDD4 OS=Homo sapiens OX=9606	NEDD4			0.868208	0.232676	55.062	12	10	84	8	1319	149	6.58	10	6	5	9	7	6	6	5	7	4	7	3	1		0.223836	0.0499182	0.160336	0.261127	0.244705	0.150669	-0.0600243	0.0657568	0.14834
	0.364172	0.0740325	1.05265	High	Q96A35	39S ribosomal protein L24, mitochondrial OS=Homo sapiens OX=9606	MRPL24			0.324978	0.534114	30.379	36	6	84	6	216	24.9	9.29	8	5	6	8	14	4	6	7	4	4	6	7	1		-0.430188	-0.465615	-0.23047	-0.387008	-0.251848	-0.26532	-0.334831	-0.497293	-0.374002
	0.188783	0.0740267	1.05265	High	P51114	RNA-binding protein FXR1 OS=Homo sapiens OX=9606	FXR1			0.0602145	0.873843	177.452	51	22	1296	20	621	69.7	6.15	25	28	27	27	25	21	24	21	28	26	26	23	1	Met-loss+Acetyl [N-Term]	1.89628	1.65012	1.73396	1.72222	2.09607	1.68415	1.85379	1.9019	1.55145
	0.192402	0.0737966	1.05248	High	Q8N5L8	Ribonuclease P protein subunit p25-like protein OS=Homo sapiens OX=9606	RPP25L			0.380214	0.483038	16.34	52	4	82	4	163	17.6	10.3	2	4	2	2	1	5	2	3	1	5	1	4	1		-2.05912	-2.27206	-1.93249	-2.02671	-2.19563	-1.81994	-1.9344	-1.93063	-1.88363
	0.648316	0.0735912	1.05233	High	Q9UI10	Translation initiation factor eIF-2B subunit delta OS=Homo sapiens OX=9606	EIF2B4			0.541514	0.368455	35.963	21	7	201	7	523	57.5	9.38	10	13	15	11	16	16	16	12	10	10	11	7	1		0.833955	0.731009	0.890756	0.93436	0.872746	0.869389	0.83371	0.944366	0.910347
	0.651806	0.0734482	1.05223	High	P17980	26S proteasome regulatory subunit 6A OS=Homo sapiens OX=9606	PSMC3			1.03524	0.192141	123.275	43	15	857	15	439	49.2	5.24	47	49	58	48	50	53	65	44	57	48	54	49	1		3.12471	3.23927	3.11548	3.29643	3.20827	3.1951	3.41518	3.36778	3.21569
	0.745881	0.0733763	1.05218	High	Q96AY3	Peptidyl-prolyl cis-trans isomerase FKBP10 OS=Homo sapiens OX=9606	FKBP10			0.472659	0.411639	129.973	43	17	1658	17	582	64.2	5.62	78	80	79	76	80	86	84	100	93	88	86	93	1		3.89005	3.82973	3.98013	3.9605	3.99607	3.96347	3.90421	3.9703	4.1029
	1.00517	0.0733668	1.05217	High	P26368	Splicing factor U2AF 65 kDa subunit OS=Homo sapiens OX=9606	U2AF2			0.220503	0.642634	78.084	28	9	676	9	475	53.5	9.09	34	27	22	34	24	30	26	29	32	34	34	30	1	Met-loss+Acetyl [N-Term]	2.40497	2.29751	2.31487	2.39673	2.41827	2.42245	2.38383	2.5694	2.26576
	0.185571	0.0732867	1.05211	High	Q06136	3-ketodihydrosphingosine reductase OS=Homo sapiens OX=9606	KDSR			0.193907	0.67586	9.859	9	2	53	2	332	36.2	7.12	2	5	3	3	4	3	5	3	3	3	3	5	1		-2.27553	-2.2954	-2.08509	-2.10746	-2.39588	-1.93282	-2.14858	-2.43384	-2.26677
	0.185136	0.0730546	1.05194	High	Q16762	Thiosulfate sulfurtransferase OS=Homo sapiens OX=9606	TST			0.241947	0.618479	9.415	10	2	77	2	297	33.4	7.25	6	5	7	9	11	6	6	7	6	5	3	4	1		-1.37755	-1.28658	-1.0201	-1.20443	-0.952335	-1.30829	-1.16579	-1.10887	-0.973003
	0.981987	0.0726687	1.05166	High	Q969Z0	FAST kinase domain-containing protein 4 OS=Homo sapiens OX=9606	TBRG4			0.397581	0.467281	111.852	42	14	386	14	631	70.7	7.42	28	28	31	23	27	31	26	30	29	28	28	31	1		2.29726	2.36045	2.40839	2.41888	2.41164	2.45358	2.32825	2.4296	2.57054
	0.715828	0.0725924	1.0516	High	Q02809	Procollagen-lysine,2-oxoglutarate 5-dioxygenase 1 OS=Homo sapiens OX=9606	PLOD1			0.909161	0.217874	274.054	61	31	3519	31	727	83.5	6.95	118	187	162	165	169	174	169	177	164	167	171	173	1		4.41879	4.31938	4.35149	4.48994	4.36782	4.44967	4.48237	4.43239	4.63276
	0.286245	0.0724271	1.05148	High	Q8IWB1	Inositol 1,4,5-trisphosphate receptor-interacting protein OS=Homo sapiens OX=9606	ITPRIP			0.60324	0.334444	8.543	6	2	5	2	547	62	5.88		1		1	1	1	1						1		-2.82037	-2.82639	-2.6313	-2.57196	-2.64921	-2.83961	-2.95729	-2.90393	-2.74776
	0.28331	0.0721963	1.05132	High	P15291	Beta-1,4-galactosyltransferase 1 OS=Homo sapiens OX=9606	B4GALT1			0.183193	0.689624	14.877	20	4	88	4	398	43.9	8.65	6	4	5	5	5	5	4	7	5	4	5	4	1		-0.652469	-0.663384	-0.687003	-0.476388	-0.798824	-0.511055	-0.752579	-1.07567	-0.444611
	0.382755	0.0720323	1.0512	High	P04179	Superoxide dismutase [Mn], mitochondrial OS=Homo sapiens OX=9606	SOD2			0.660529	0.308723	77.235	46	6	457	6	222	24.7	8.25	13	16	17	20	22	21	26	22	28	21	19	26	1		2.42811	2.41194	2.6092	2.58895	2.46114	2.61525	2.58296	2.64101	2.61925
	0.224643	0.0718848	1.05109	High	Q14980	Nuclear mitotic apparatus protein 1 OS=Homo sapiens OX=9606	NUMA1			0.846479	0.239723	379.265	36	50	863	50	2115	238.1	5.78	6	5	12	7	9	6	10	4	19	20	7	8	1		1.8712	2.02973	2.12841	1.93987	2.27499	2.03014	2.68818	2.35342	2.11379
	0.700729	0.071722	1.05097	High	P02452	Collagen alpha-1(I) chain OS=Homo sapiens OX=9606	COL1A1			0.98643	0.203095	258.794	35	26	1064	26	1464	138.8	5.8	37	30	39	42	37	43	41	41	34	37	39	36	1		3.37923	3.35202	3.44059	3.40549	3.44543	3.53607	3.46813	3.51957	3.66794
	0.83335	0.0717061	1.05096	High	Q14254	Flotillin-2 OS=Homo sapiens OX=9606	FLOT2			1.77883	0.091123	79.168	41	14	460	14	428	47	5.25	3	3	2	3	2	4	5	6	7	8	2	4	1		0.795918	0.756701	0.888373	0.870456	0.899166	0.88649	1.21292	0.999461	1.3955
	0.374328	0.0715745	1.05086	High	P98082	Disabled homolog 2 OS=Homo sapiens OX=9606	DAB2			0.536846	0.371443	38.876	16	8	242	8	770	82.4	5.53	15	11	11	12	11	20	9	11	12	8	10	10	1		0.857636	0.608945	0.747556	0.779613	0.769222	0.880026	0.803326	0.882321	0.889576
	0.324659	0.0715542	1.05085	High	Q9HBI1	Beta-parvin OS=Homo sapiens OX=9606	PARVB			0.189901	0.680249	23.451	14	4	127	2	364	41.7	6.73	8	8	10	7	7	7	10	8	10	9	14	9	1		-2.43677	-2.57378	-2.67826	-2.47456	-2.40128	-2.59832	-2.53833	-2.5947	-2.50423
	0.353493	0.0714029	1.05074	High	P49770	Translation initiation factor eIF-2B subunit beta OS=Homo sapiens OX=9606	EIF2B2			0.355825	0.504831	23.126	22	5	52	5	351	39	6.16	3	8	5	3	7	2	3	3	5	2	5	2	1		-0.59978	-0.817441	-0.589293	-0.54293	-0.673077	-0.5763	-0.49159	-0.546752	-0.651323
	0.225469	0.0712032	1.05059	High	Q9H0B6	Kinesin light chain 2 OS=Homo sapiens OX=9606	KLC2			0.710302	0.290313	74.211	19	10	399	6	622	68.9	7.15	27	25	30	30	29	22	32	19	23	29	26	28	1		2.42923	2.28891	2.63525	2.57512	2.38066	2.61122	2.69304	2.57772	2.75022
	0.293325	0.071085	1.05051	High	O00462	Beta-mannosidase OS=Homo sapiens OX=9606	MANBA			0.0550378	0.881702	11.496	4	3	20	3	879	100.8	5.52	2	1	1	3	2	2	2		3	1	1	2	1		-2.13711	-2.35339	-2.26226	-2.04344	-2.30414	-2.19193	-2.1653	-2.51684	-2.01644
	0.145146	0.0710036	1.05045	High	O15127	Secretory carrier-associated membrane protein 2 OS=Homo sapiens OX=9606	SCAMP2			0.05379	0.884071	17.044	10	2	129	2	329	36.6	6.1	12	9	7	6	7	7	8	9	10	4	7	10	1		0.483697	0.855571	0.644595	0.621392	1.02237	0.553108	0.635271	0.738206	0.648035
	0.137597	0.0708733	1.05035	High	P32969	60S ribosomal protein L9 OS=Homo sapiens OX=9606	RPL9P9			0.0517491	0.888124	133.991	64	11	2083	11	192	21.9	9.95	46	67	41	58	49	60	45	67	44	63	45	65	1		3.52803	3.06459	3.36068	3.36876	3.1678	3.62936	3.47996	3.21801	3.4802
	0.230342	0.0705433	1.05011	High	Q08211	ATP-dependent RNA helicase A OS=Homo sapiens OX=9606	DHX9			0.716546	0.287537	464.043	46	45	3522	45	1270	140.9	6.84	37	45	45	39	47	38	50	53	53	62	52	47	1		3.67028	3.42293	3.5694	3.52433	3.81711	3.53279	3.94288	3.84466	3.62973
	0.331852	0.0704314	1.05003	High	O94874	E3 UFM1-protein ligase 1 OS=Homo sapiens OX=9606	UFL1			0.170416	0.706517	135.742	40	24	757	24	794	89.5	6.79	55	47	55	52	59	53	52	50	56	47	51	56	1		2.83103	3.11902	2.91338	3.05795	2.99734	3.01944	2.94768	2.96811	3.06245
	0.264569	0.0703615	1.04998	High	Q9NX47	E3 ubiquitin-protein ligase MARCHF5 OS=Homo sapiens OX=9606	MARCHF5			0.742049	0.27657	11.691	12	2	24	2	278	31.2	8.7	2	1	1	2	2	2	2	2	4	2	1	3	1		-1.53639	-1.61072	-1.45112	-1.35972	-1.6535	-1.37392	-1.26507	-1.42773	-1.29876
	0.634974	0.0702209	1.04988	High	P04844	Dolichyl-diphosphooligosaccharide--protein glycosyltransferase subunit 2 OS=Homo sapiens OX=9606	RPN2			0.970549	0.205642	336.812	55	22	2649	22	631	69.2	5.69	74	91	76	78	82	81	88	80	86	84	93	105	1		4.39033	4.5428	4.51829	4.52319	4.57573	4.56316	4.58776	4.56598	4.6298
	0.243754	0.0701701	1.04984	High	P62861	FAU ubiquitin-like and ribosomal protein S30 OS=Homo sapiens OX=9606	FAU			0.418289	0.451286	10.015	8	2	653	2	133	14.4	10.17	14	16	16	16	16	15	17	22	18	20	20	21	1		3.19568	2.98299	3.23389	3.27284	3.04353	3.3067	3.354	3.21957	3.28231
	0.356891	0.0700347	1.04974	High	Q4KMQ2	Anoctamin-6 OS=Homo sapiens OX=9606	ANO6			0.39248	0.47136	22.621	8	4	75	4	910	106.1	7.77	2	2	2	5	1	2	3	5	3	4	2	6	1		-1.88123	-2.06929	-1.87823	-1.9631	-1.78372	-1.87181	-1.9533	-0.715501	-1.82978
	0.22826	0.0699164	1.04966	High	Q969T3	Sorting nexin-21 OS=Homo sapiens OX=9606	SNX21			0.136273	0.751802	3.758	6	1	23	1	373	41.3	5.24	1		1	2	2		1		1	4	2	3	1		1.01877	1.04505	0.736844	0.967946	0.907166	1.13531	1.06737	0.869393	0.798056
	0.204249	0.0698318	1.04959	High	Q9BXB5	Oxysterol-binding protein-related protein 10 OS=Homo sapiens OX=9606	OSBPL10			1.11824	0.177049	10.934	5	3	58	2	764	83.9	8.31	4	4	3	5	2	4	2	6	2	4	2	4	1		-3.54229	-3.5878	-3.89361	-3.74341	-3.57221	-3.49858	-3.35411	-3.37645	-3.40455
	0.976661	0.0697943	1.04957	High	Q9P015	39S ribosomal protein L15, mitochondrial OS=Homo sapiens OX=9606	MRPL15			0.707224	0.290829	45.813	39	9	214	9	296	33.4	10.01	7	14	14	11	17	16	13	14	15	15	13	12	1		1.58196	1.60201	1.67893	1.72209	1.67786	1.67233	1.74406	1.62938	1.69652
	0.155437	0.0697886	1.04956	High	Q9P2X3	Protein IMPACT OS=Homo sapiens OX=9606	IMPACT			0.292592	0.563657	8.63	9	2	37	2	320	36.5	4.97	2	4	4	2	2	4	4	4	2	2	4	1	1		-1.51099	-1.95565	-1.7117	-1.52506	-1.87078	-1.57313	-1.74302	-1.77172	-2.01797
	0.1967	0.069725	1.04952	High	P09601	Heme oxygenase 1 OS=Homo sapiens OX=9606	HMOX1			0.136334	0.752045	4.707	6	1	17	1	288	32.8	8.25	3		1	2	2	1	3	1			1	3	1		-2.79288	-2.59936	-2.73728	-2.43252	-2.628	-2.85983	-2.81442	-2.39825	-2.55469
	0.128874	0.0696239	1.04944	High	O95450	A disintegrin and metalloproteinase with thrombospondin motifs 2 OS=Homo sapiens OX=9606	ADAMTS2			0.0332275	0.924067	9.279	2	1	14	1	1211	134.7	7.15		2	1	1		2		2	2	2	1	1	1		-3.26531	-3.65067	-3.71247	-3.63116	-3.5956	-3.19283	-3.2352	-4.10531	-3.39468
	0.216755	0.069603	1.04943	High	Q96D53	Atypical kinase COQ8B, mitochondrial OS=Homo sapiens OX=9606	COQ8B			0.0925746	0.815873	7.43	6	2	51	2	544	60	7.23	5	2	4	3	6	5	4	7	5	2	3	4	1		-2.79668	-2.49255	-2.8438	-2.61367	-2.75468	-2.55587	-2.54095	-2.72378	-2.69513
	0.176209	0.0695235	1.04937	High	P08621	U1 small nuclear ribonucleoprotein 70 kDa OS=Homo sapiens OX=9606	SNRNP70			0.926427	0.213761	100.582	33	11	490	11	437	51.5	9.94	11	11	5	10	10	10	13	10	18	11	12	7	1		1.17664	0.990567	0.882752	0.876946	1.30165	1.07994	1.51797	1.58165	1.12897
	0.74095	0.0694332	1.0493	High	P20020	Plasma membrane calcium-transporting ATPase 1 OS=Homo sapiens OX=9606	ATP2B1			1.99063	0.0748709	212.841	28	24	1275	17	1220	134.6	5.91	66	68	76	73	65	73	77	78	71	70	74	73	1	Met-loss+Acetyl [N-Term]	3.33463	3.37752	3.23499	3.39444	3.392	3.36901	3.45939	3.49374	3.50672
	0.823744	0.0694186	1.04929	High	Q9Y4K1	Beta/gamma crystallin domain-containing protein 1 OS=Homo sapiens OX=9606	CRYBG1			0.943413	0.209711	128.665	22	23	396	23	1723	188.6	5.86	12	11	11	11	16	11	18	13	17	14	13	14	1		2.32953	2.26451	2.34975	2.43998	2.3405	2.37157	2.46134	2.35513	2.43114
	0.568396	0.0693607	1.04925	High	Q05048	Cleavage stimulation factor subunit 1 OS=Homo sapiens OX=9606	CSTF1			0.281476	0.575845	111.487	47	11	382	11	431	48.3	6.58	17	19	15	17	18	13	13	17	25	20	17	13	1		1.19754	1.18953	1.28713	1.20601	1.34657	1.32971	1.41689	1.28062	1.19679
	0.40942	0.0693156	1.04922	High	Q8IXM6	Nurim OS=Homo sapiens OX=9606	NRM			1.98228	0.075432	6.74	7	2	97	2	262	29.4	8.63	7	7	5	7	6	3	7	5	3	4	2	10	1		-1.82263	-2.00684	-1.80948	-1.76933	-1.78536	-1.87632	-1.57749	-1.65588	-1.55563
	0.308282	0.0692685	1.04918	High	P83731	60S ribosomal protein L24 OS=Homo sapiens OX=9606	RPL24			1.24225	0.154274	69.887	27	6	1968	6	157	17.8	11.25	57	54	54	45	56	64	59	63	73	59	64	65	1		4.63261	4.3513	4.60414	4.56153	4.60397	4.63036	4.74639	4.76219	4.75785
	0.116452	0.0690797	1.04905	High	Q5JS54	Proteasome assembly chaperone 4 OS=Homo sapiens OX=9606	PSMG4			1.17258	0.164757	8.561	10	1	7	1	123	13.8	6.52	1	1	1	1					1	1		1	1		-3.40737	-3.03662	-3.19276	-2.77207	-3.28825	-3.3692	-2.79391	-2.76961	-2.5168
	0.258394	0.0689691	1.04897	High	Q13641	Trophoblast glycoprotein OS=Homo sapiens OX=9606	TPBG			0.0788201	0.840154	9.134	5	2	85	2	420	46	6.83	5	5	3	7	5	4	2	5	3	6	5	7	1		-1.41876	-1.45504	-1.21071	-1.20103	-1.43924	-1.23733	-1.25425	-1.49707	-1.18697
	0.11539	0.0689545	1.04896	High	Q5T160	Probable arginine--tRNA ligase, mitochondrial OS=Homo sapiens OX=9606	RARS2			0.0201773	0.954269	16.696	12	3	18	3	578	65.5	8.21	2	1	3	2	1	2	1	2	1	1	1	1	1		-3.31682	-3.02942	-3.61295	-3.00447	-3.27013	-3.47773	-3.45405	-3.46029	-2.88649
	0.137623	0.0688992	1.04892	High	Q8WXF7	Atlastin-1 OS=Homo sapiens OX=9606	ATL1			0.0317057	0.926978	18.323	9	3	31	3	558	63.5	6.18	2	2	1	5	2	3	3	2	2	2	3	3	1		-2.62961	-2.87894	-2.28843	-2.44159	-2.66857	-2.48011	-2.77545	-2.3622	-2.56925
	1.02799	0.0688254	1.04886	High	O75131	Copine-3 OS=Homo sapiens OX=9606	CPNE3			0.340141	0.517641	149.102	50	19	1158	18	537	60.1	5.85	19	26	24	21	27	26	24	29	32	27	27	29	1		1.77561	1.70095	1.67567	1.80489	1.77876	1.77506	1.97584	1.66356	1.81964
	0.247783	0.0686932	1.04877	High	Q96B36	Proline-rich AKT1 substrate 1 OS=Homo sapiens OX=9606	AKT1S1			0.603579	0.334315	5.982	6	1	52	1	256	27.4	4.75	6	7	5	6	5	4	2	3	4	3	5	2	1		-1.44134	-1.591	-1.66091	-1.67179	-1.4245	-1.39087	-1.49664	-1.13334	-1.37605
	0.248621	0.0686461	1.04873	High	Q9Y4E1	WASH complex subunit 2C OS=Homo sapiens OX=9606	WASHC2C			1.02818	0.194277	73.452	13	10	170	10	1320	144.8	4.79	11	14	17	10	13	12	10	16	14	11	11	7	1		1.39153	1.48066	1.25274	1.55486	1.27232	1.50369	1.15385	1.26318	1.18636
	0.379692	0.0686321	1.04872	High	Q96DB5	Regulator of microtubule dynamics protein 1 OS=Homo sapiens OX=9606	RMDN1			0.316086	0.542728	44.121	32	8	359	8	314	35.8	8.5	24	21	32	31	21	29	24	23	26	29	24	29	1		1.19561	1.32605	1.12624	1.37837	1.21747	1.25797	1.38576	1.21756	1.31666
	0.134332	0.0685819	1.04869	High	Q9BZJ0	Crooked neck-like protein 1 OS=Homo sapiens OX=9606	CRNKL1			0.0687009	0.857332	9.44	4	3	7	3	848	100.4	8	1	1			1		1	1					1		-1.82861	-1.43368	-1.32497	-1.63298	-1.49118	-1.25736	-1.90783	-1.39953	-1.42235
	0.272953	0.0685711	1.04868	High	Q4ZIN3	Membralin OS=Homo sapiens OX=9606	TMEM259			1.10764	0.179336	10.967	5	3	50	3	620	67.8	5.3	3	5	3	5	5	6	1	4	5	5	3	5	1		-2.32801	-2.26907	-2.01477	-2.12574	-2.19175	-2.08865	-2.02218	-1.9079	-1.96676
	0.832078	0.0683034	1.04848	High	Q9UNE7	E3 ubiquitin-protein ligase CHIP OS=Homo sapiens OX=9606	STUB1			0.777212	0.266913	52.073	26	6	446	6	303	34.8	5.87	22	28	23	24	20	19	23	15	29	27	23	29	1		1.96207	1.87347	1.89407	2.02647	1.97519	1.93286	1.94431	1.98038	2.04014
	0.383482	0.0682265	1.04843	High	O14662	Syntaxin-16 OS=Homo sapiens OX=9606	STX16			0.280835	0.576556	18.083	15	3	142	3	325	37	6.11	8	10	9	10	8	12	12	14	8	11	8	7	1		-0.40272	-0.218591	-0.453053	-0.257194	-0.333933	-0.278559	-0.315189	-0.27811	-0.303022
	0.568121	0.0681763	1.04839	High	Q12797	Aspartyl/asparaginyl beta-hydroxylase OS=Homo sapiens OX=9606	ASPH			0.931833	0.21217	111.257	30	17	899	17	758	85.8	5.01	35	37	29	38	41	38	38	40	38	35	39	41	1		3.01378	3.08383	3.0822	3.08895	3.22376	3.07162	3.17928	3.15294	3.17514
	0.388684	0.068154	1.04837	High	P18754	Regulator of chromosome condensation OS=Homo sapiens OX=9606	RCC1			1.11365	0.177873	126.682	54	12	649	12	421	44.9	7.52	20	23	17	16	23	16	24	23	24	24	16	27	1		2.21611	2.07607	2.20959	2.33542	2.23676	2.13406	2.36553	2.29148	2.40007
	0.411037	0.0680103	1.04827	High	Q9NZN8	CCR4-NOT transcription complex subunit 2 OS=Homo sapiens OX=9606	CNOT2			1.05321	0.188973	14.527	12	3	42	3	540	59.7	7.66	2	2	2	3	2	1	2	2	1	1	3	2	1		-1.73871	-1.81535	-1.67963	-1.72969	-1.56011	-1.73987	-1.58176	-1.54319	-1.61852
	0.59079	0.0679232	1.04821	High	Q9ULV4	Coronin-1C OS=Homo sapiens OX=9606	CORO1C			1.04754	0.190285	165.566	40	15	2088	13	474	53.2	7.08	66	74	80	60	67	71	72	75	84	91	72	81	1		4.34523	4.20987	4.24126	4.28395	4.39069	4.32549	4.45236	4.43766	4.33191
	0.215898	0.0678221	1.04813	High	Q9Y5J7	Mitochondrial import inner membrane translocase subunit Tim9 OS=Homo sapiens OX=9606	TIMM9			0.0679773	0.85838	8.279	30	2	43	2	89	10.4	7.21	3	3	6	3	4	2	2	3	4	2	2	5	1	Met-loss+Acetyl [N-Term]	-1.20646	-0.823049	-1.13001	-1.04141	-0.922466	-0.992174	-1.10267	-1.10374	-0.746819
	0.183763	0.0677427	1.04808	High	O96000	NADH dehydrogenase [ubiquinone] 1 beta subcomplex subunit 10 OS=Homo sapiens OX=9606	NDUFB10			0.11615	0.780001	32.854	28	5	297	5	172	20.8	8.48	14	12	13	12	15	12	14	13	11	11	13	15	1		0.942149	1.12998	0.660533	0.924272	1.04068	0.970936	1.1925	0.997405	0.852251
	1.54017	0.0675443	1.04793	High	Q92791	Endoplasmic reticulum protein SC65 OS=Homo sapiens OX=9606	P3H4			0.962721	0.20712	42.317	21	8	309	7	437	50.3	4.77	14	14	14	15	13	13	19	13	11	10	12	14	1		-0.0202589	-0.0534678	0.0023241	0.0354738	0.0281849	0.0675716	0.0245552	0.106053	0.273794
	0.787102	0.0674286	1.04785	High	P82930	28S ribosomal protein S34, mitochondrial OS=Homo sapiens OX=9606	MRPS34			1.05696	0.188026	21.396	28	4	167	4	218	25.6	9.98	14	8	9	9	12	9	10	10	6	8	8	6	1		0.937001	0.926663	1.02949	1.05539	0.987375	1.05267	1.05709	1.03174	1.06518
	0.236868	0.067297	1.04775	High	Q8NBN3	Transmembrane protein 87A OS=Homo sapiens OX=9606	TMEM87A			0.0703845	0.854986	18.214	7	2	88	2	555	63.4	6.74	6	4	5	5	4	5	6	4	6	5	6	5	1		-0.71761	-0.78888	-0.70103	-0.707683	-0.464157	-0.83379	-0.830597	-0.5323	-0.74892
	0.659313	0.0672944	1.04775	High	Q08431	Lactadherin OS=Homo sapiens OX=9606	MFGE8			0.890141	0.224679	84.152	47	12	593	12	387	43.1	8.15	20	16	15	27	22	22	21	26	25	19	19	29	1		2.05847	2.06676	1.95414	2.07214	2.1506	2.05851	2.13106	2.08847	2.1431
	0.289637	0.0672652	1.04773	High	O00267	Transcription elongation factor SPT5 OS=Homo sapiens OX=9606	SUPT5H			0.633972	0.321805	85.288	22	15	255	15	1087	120.9	5.06	8	6	10	8	10	6	10	9	5	2	7	2	1		0.992793	1.08184	1.05165	0.973603	1.28004	1.07444	0.822004	1.08981	0.800348
	0.920888	0.0669117	1.04747	High	P15311	Ezrin OS=Homo sapiens OX=9606	EZR			0.342774	0.515568	192.485	39	23	2858	13	586	69.4	6.27	149	166	165	167	157	190	165	168	184	167	192	158	1		4.51985	4.43588	4.50084	4.51774	4.59458	4.54499	4.50759	4.58938	4.39985
	0.395148	0.0668875	1.04745	High	Q13011	Delta(3,5)-Delta(2,4)-dienoyl-CoA isomerase, mitochondrial OS=Homo sapiens OX=9606	ECH1			1.13707	0.174005	74.605	47	9	337	9	328	35.8	8	18	18	17	19	16	29	23	27	25	23	24	24	1		2.04646	2.09039	2.04354	2.16322	2.22584	1.992	2.19295	2.23796	2.28297
	0.218336	0.0667852	1.04738	High	Q9BV20	Methylthioribose-1-phosphate isomerase OS=Homo sapiens OX=9606	MRI1			0.454218	0.422117	10.044	8	2	18	2	369	39.1	6.3	2	2		3	1	1	2	3	1	1	2		1		-1.86473	-2.26966	-2.07759	-2.04575	-1.99735	-1.96853	-2.23555	-2.08007	-2.18791
	0.136665	0.066707	1.04732	High	Q96G23	Ceramide synthase 2 OS=Homo sapiens OX=9606	CERS2			0.0253591	0.942034	21.584	12	3	61	3	380	44.8	8.98	8	3	2	5	5	2	8	4	7	3	5	2	1		1.57631	1.39399	1.65553	1.47827	1.41561	1.93207	1.38184	1.45677	1.88139
	0.203773	0.0664622	1.04715	High	Q9UJY5	ADP-ribosylation factor-binding protein GGA1 OS=Homo sapiens OX=9606	GGA1			0.411418	0.455963	7.19	6	2	14	2	639	70.3	5.29		2	2		2	1	1	1			3		1		-2.80838	-2.61262	-2.94694	-2.61974	-2.88101	-2.6678	-3.11796	-2.78788	-2.84517
	0.123796	0.0663516	1.04707	High	Q9ULC4	Malignant T-cell-amplified sequence 1 OS=Homo sapiens OX=9606	MCTS1			0.0269815	0.937986	29.587	32	4	76	4	181	20.5	8.82	7	6	5	6	6	7	6	6	4	6	3	5	1		-0.1401	-0.195859	0.324697	0.17204	-0.148855	0.164608	-0.0637779	-0.136611	0.2645
	0.785969	0.0662702	1.04701	High	P15531	Nucleoside diphosphate kinase A OS=Homo sapiens OX=9606	NME1			1.13727	0.174095	117.793	76	8	2094	5	152	17.1	6.19	101	112	100	105	108	122	102	113	110	122	125	117	1		4.50745	4.42569	4.52128	4.55831	4.50466	4.59027	4.64571	4.53762	4.67142
	0.126928	0.0662403	1.04698	High	Q13242	Serine/arginine-rich splicing factor 9 OS=Homo sapiens OX=9606	SRSF9			0.483776	0.404215	25.423	24	6	223	6	221	25.5	8.65	1	2		2		1	2	2		1	1		1		-1.61033	-2.20448	-1.79501	-1.93962	-1.79448	-1.67701	-1.59533	-1.42432	-1.76257
	0.969628	0.066206	1.04696	High	O00469	Procollagen-lysine,2-oxoglutarate 5-dioxygenase 2 OS=Homo sapiens OX=9606	PLOD2			0.728184	0.2824	242.764	47	28	2461	28	737	84.6	6.71	113	124	126	123	123	128	142	134	155	139	131	150	1		6.18856	6.1003	6.19326	6.22549	6.20959	6.24566	6.26696	6.20657	6.1782
	0.136983	0.0659784	1.04679	High	P03928	ATP synthase protein 8 OS=Homo sapiens OX=9606	MT-ATP8			0.0496692	0.891496	5.636	13	1	29	1	68	8	9.91	4	1	3	3	3	2	2	2	3	2	2	2	1		-0.0834417	0.269193	-0.160371	0.0271044	0.299999	-0.103788	0.0330505	0.245624	-0.0458908
	0.637224	0.065773	1.04665	High	P78347	General transcription factor II-I OS=Homo sapiens OX=9606	GTF2I			0.843901	0.240123	192.014	46	32	1491	32	998	112.3	6.39	79	82	79	78	71	76	64	63	62	54	59	61	1	Met-loss+Acetyl [N-Term]	3.62727	3.57857	3.72031	3.66613	3.7254	3.73195	3.73999	3.75956	3.70184
	0.303729	0.0656172	1.04653	High	Q13630	GDP-L-fucose synthase OS=Homo sapiens OX=9606	GFUS			0.232866	0.628186	29.902	30	7	135	7	321	35.9	6.6	14	17	14	16	10	9	12	10	8	6	10	8	1		1.19017	1.25634	1.38689	1.33188	1.46349	1.23488	1.39024	1.37941	1.29208
	0.228478	0.065553	1.04649	High	Q86WA6	Valacyclovir hydrolase OS=Homo sapiens OX=9606	BPHL			0.235661	0.625412	7.966	13	2	16	2	291	32.5	9.14	3	1	2	1	2		1		2	1	2	1	1		-1.63218	-1.46139	-1.76762	-1.69273	-1.47791	-1.49389	-1.49945	-1.65169	-1.31058
	0.426325	0.0654844	1.04644	High	P61978	Heterogeneous nuclear ribonucleoprotein K OS=Homo sapiens OX=9606	HNRNPK			0.341178	0.516838	290.324	64	26	4997	26	463	50.9	5.54	162	200	181	194	187	198	206	202	204	212	223	221	1	Acetyl [N-Term]	6.0802	5.90365	5.9292	5.99984	6.10776	6.0019	6.02265	6.16206	5.99319
	1.1233	0.0654437	1.04641	High	P49257	Protein ERGIC-53 OS=Homo sapiens OX=9606	LMAN1			1.06112	0.187495	136.946	42	13	563	13	510	57.5	6.77	42	25	29	38	40	30	32	30	34	32	28	30	1		3.41148	3.41012	3.47298	3.53272	3.48121	3.47698	3.46467	3.65933	3.59881
	0.0850101	0.0653191	1.04632	High	P46020	Phosphorylase b kinase regulatory subunit alpha, skeletal muscle isoform OS=Homo sapiens OX=9606	PHKA1			0.0510254	0.889442	9.769	4	2	15	2	1223	137.2	6.19	3		3	2	1	1	1		3			1	1		-3.19531	-2.57162	-3.42305	-2.87952	-2.92446	-3.19004	-3.16432	-2.43988	-3.15168
	0.256227	0.0650482	1.04612	High	Q8IVD9	NudC domain-containing protein 3 OS=Homo sapiens OX=9606	NUDCD3			0.472409	0.411403	21.314	14	4	161	4	361	40.8	5.25	11	12	12	13	13	11	13	11	9	11	9	9	1		0.127889	0.257192	0.279963	0.1801	0.463747	0.216341	0.124859	0.12127	0.200909
	0.179216	0.0649535	1.04605	High	Q9Y2S7	Polymerase delta-interacting protein 2 OS=Homo sapiens OX=9606	POLDIP2			0.807624	0.254566	45.459	36	8	195	8	368	42	8.63	17	11	19	13	16	15	15	18	12	18	11	19	1		0.947682	0.831689	1.23946	1.10091	0.946198	1.16658	1.18735	1.25719	1.35434
	0.382618	0.0648702	1.04599	High	Q14699	Raftlin OS=Homo sapiens OX=9606	RFTN1			0.547245	0.365836	89.914	32	9	294	9	578	63.1	5.67	12	12	9	9	10	8	11	8	12	8	13	9	1		0.780328	0.653007	0.600398	0.666818	0.829374	0.732151	0.830009	0.797837	0.735666
	0.442917	0.0648333	1.04596	High	P49406	39S ribosomal protein L19, mitochondrial OS=Homo sapiens OX=9606	MRPL19			0.488501	0.401057	23.483	17	4	256	4	292	33.5	9.5	18	16	17	14	18	18	16	13	14	21	15	15	1		0.719583	0.815978	0.81088	0.905192	0.897694	0.738054	0.849098	0.839143	0.928795
	0.151518	0.0646114	1.0458	High	P30049	ATP synthase subunit delta, mitochondrial OS=Homo sapiens OX=9606	ATP5F1D			0.0538288	0.884164	20.242	32	2	183	2	168	17.5	5.49	10	11	11	7	11	11	12	11	12	9	10	13	1		2.23478	2.50345	2.17937	2.33064	2.60186	2.17895	2.30488	2.37192	2.3728
	0.301692	0.0642281	1.04553	High	Q14498	RNA-binding protein 39 OS=Homo sapiens OX=9606	RBM39			0.561615	0.35938	63.922	25	9	340	9	530	59.3	10.1	16	16	14	13	14	11	13	8	10	8	11	11	1		1.20613	1.08563	0.965571	1.127	1.24873	1.07428	1.40038	1.21297	1.14668
	0.15429	0.0642109	1.04551	High	P46199	Translation initiation factor IF-2, mitochondrial OS=Homo sapiens OX=9606	MTIF2			0.559187	0.360475	4.792	2	1	11	1	727	81.3	7.15	3	2	1	1	2	1						1	1		-3.85096	-3.83911	-3.38326	-3.67133	-3.60998	-3.5994	-3.47492	-3.44496	-3.48724
	0.112347	0.0641931	1.0455	High	O95197	Reticulon-3 OS=Homo sapiens OX=9606	RTN3			0.081259	0.835673	6.78	1	1	52	1	1032	112.5	4.96	3	3	3	2	2	2	3	3	4	3	2	4	1		-0.600007	-0.0401354	-0.0104971	-0.223903	0.00355911	-0.237717	-0.217785	-0.158122	0.0657997
	0.25966	0.0637487	1.04518	High	Q9UBP6	tRNA (guanine-N(7)-)-methyltransferase OS=Homo sapiens OX=9606	METTL1			0.801849	0.256941	27.096	30	4	51	4	276	31.5	7.64	3	7	7	6	4	2	3	2	4	4	4	5	1		-0.873313	-0.998162	-0.667417	-0.776237	-0.758242	-0.813168	-0.698009	-0.46985	-0.702871
	0.578873	0.0637112	1.04515	High	O94979	Protein transport protein Sec31A OS=Homo sapiens OX=9606	SEC31A			0.396841	0.467535	131.436	23	19	745	19	1220	132.9	6.89	54	49	47	50	45	51	45	49	46	45	40	42	1		3.32697	3.31123	3.45431	3.40806	3.41014	3.46545	3.35945	3.42949	3.42662
	0.169487	0.0637067	1.04515	High	P33241	Lymphocyte-specific protein 1 OS=Homo sapiens OX=9606	LSP1			0.0537822	0.883888	10.476	9	2	17	2	339	37.2	4.74													1		0.208549	0.221038	-0.167729	0.125283	0.269516	0.0581779	0.0351315	0.278144	0.0862045
	0.297893	0.0635649	1.04504	High	Q5VTR2	E3 ubiquitin-protein ligase BRE1A OS=Homo sapiens OX=9606	RNF20			0.185135	0.687418	17.657	6	4	43	4	975	113.6	5.94	3	2	4	5	2	4	4	3	4	5	4	3	1		-1.50642	-1.31358	-1.578	-1.34778	-1.46915	-1.39038	-1.43999	-1.53032	-1.42298
	0.254864	0.0634104	1.04493	High	Q86U86	Protein polybromo-1 OS=Homo sapiens OX=9606	PBRM1			0.780126	0.266971	69.963	12	14	100	14	1689	192.8	6.89													1		2.60729	2.78522	2.86001	2.94071	2.77245	2.72959	2.95064	2.85641	3.04591
	0.727127	0.0631663	1.04476	High	P27797	Calreticulin OS=Homo sapiens OX=9606	CALR			0.915983	0.216271	507.886	76	24	5863	24	417	48.1	4.44	257	277	312	301	263	304	326	315	276	316	341	361	1		7.63404	7.61252	7.55857	7.72218	7.664	7.60845	7.65425	7.70667	7.80667
	0.134301	0.0631116	1.04472	High	Q6IA86	Elongator complex protein 2 OS=Homo sapiens OX=9606	ELP2			0.255274	0.602673	12.447	7	4	17	4	826	92.4	5.96	1	1	3	2		1	2	1	1	1	2	2	1		-1.50366	-1.48861	-1.49968	-1.75071	-1.15432	-1.39758	-1.55215	-1.10961	-1.23587
	0.456984	0.0630843	1.0447	High	P55809	Succinyl-CoA:3-ketoacid coenzyme A transferase 1, mitochondrial OS=Homo sapiens OX=9606	OXCT1			0.51315	0.385467	98.94	34	12	401	11	520	56.1	7.46	25	26	27	23	26	27	26	28	26	29	30	33	1		1.82491	1.80314	1.83105	1.90386	1.7718	1.97269	1.89963	1.85701	2.05519
	0.509023	0.0630798	1.04469	High	Q96AQ6	Pre-B-cell leukemia transcription factor-interacting protein 1 OS=Homo sapiens OX=9606	PBXIP1			0.402158	0.464126	101.539	26	16	777	16	731	80.6	5.33	59	43	44	43	69	46	60	62	66	47	49	60	1		3.13368	3.04167	3.22351	3.17705	3.18824	3.22281	3.15559	3.18342	3.28134
	0.248492	0.0629374	1.04459	High	Q9Y6N5	Sulfide:quinone oxidoreductase, mitochondrial OS=Homo sapiens OX=9606	SQOR			0.23858	0.621735	61.037	36	11	273	11	450	49.9	9.11	15	20	21	22	20	21	24	22	18	24	15	24	1		1.36675	1.5203	1.6471	1.69167	1.50425	1.52703	1.56237	1.56394	1.70002
	0.403834	0.0628796	1.04455	High	P63165	Small ubiquitin-related modifier 1 OS=Homo sapiens OX=9606	SUMO1			1.77481	0.0917149	16.628	44	4	166	4	101	11.6	5.52	5	5	4	4	4	5	4	3	1	3	2	6	1	Met-loss+Acetyl [N-Term]	1.46171	1.50791	1.5954	1.47856	1.64281	1.63228	2.00083	1.75514	1.78721
	0.444104	0.0628732	1.04454	High	P00505	Aspartate aminotransferase, mitochondrial OS=Homo sapiens OX=9606	GOT2			1.20544	0.161594	207.937	64	19	1519	19	430	47.5	9.01	93	95	88	99	105	104	98	97	101	104	97	110	1		4.33671	4.32957	4.44635	4.49484	4.33985	4.46656	4.52526	4.49295	4.62523
	0.432546	0.0628395	1.04452	High	Q12849	G-rich sequence factor 1 OS=Homo sapiens OX=9606	GRSF1			0.951359	0.209169	96.909	43	13	505	13	480	53.1	6.19	17	18	24	23	27	25	20	21	22	17	21	29	1		2.13806	2.08325	2.26612	2.17865	2.21461	2.28268	2.26806	2.31691	2.29926
	0.145671	0.0626977	1.04442	High	Q99717	Mothers against decapentaplegic homolog 5 OS=Homo sapiens OX=9606	SMAD5			0.0730748	0.849072	10.503	8	2	59	1	465	52.2	7.71	1	2	2	3	4	3	4	4	4	2	3	5	1		-3.44198	-3.36006	-3.49835	-3.11862	-3.3412	-3.65248	-3.68097	-3.02404	-3.23341
	0.264056	0.0625852	1.04434	High	O95292	Vesicle-associated membrane protein-associated protein B/C OS=Homo sapiens OX=9606	VAPB			0.151543	0.731112	39.652	37	7	284	6	243	27.2	7.3	17	24	25	21	18	21	17	15	19	17	14	22	1		2.11095	2.03419	2.21527	2.09449	2.11391	2.33976	1.9943	2.21672	2.11243
	0.420155	0.062507	1.04428	High	P51149	Ras-related protein Rab-7a OS=Homo sapiens OX=9606	RAB7A			0.711926	0.289612	109.51	76	15	1635	15	207	23.5	6.7	90	97	100	99	98	105	96	101	108	98	118	106	1		4.56508	4.58833	4.59912	4.76443	4.55092	4.6247	4.75479	4.6289	4.76055
	0.393496	0.0624886	1.04427	High	Q9HA77	Probable cysteine--tRNA ligase, mitochondrial OS=Homo sapiens OX=9606	CARS2			1.86081	0.0858246	17.657	7	3	70	3	564	62.2	8.34	7	5	5	5	6	5	8	7	4	6	6	6	1		-0.659907	-0.559459	-0.465606	-0.471908	-0.571859	-0.453739	-0.336269	-0.346154	-0.283777
	0.079443	0.0623868	1.04419	High	Q9UEU0	Vesicle transport through interaction with t-SNAREs homolog 1B OS=Homo sapiens OX=9606	VTI1B			0.0146784	0.968401	8.982	14	2	23	2	232	26.7	9.04	2	1	1		4	1	2	2	1	2	1	4	1		-1.77083	-2.03133	-2.5209	-2.37272	-1.81286	-1.95032	-1.95269	-1.90484	-2.32187
	0.179406	0.0623487	1.04416	High	Q9H0A0	RNA cytidine acetyltransferase OS=Homo sapiens OX=9606	NAT10			0.0476645	0.896242	99.548	28	20	451	20	1025	115.7	8.27	1			1	1		2		2	2	1	1	1		0.496739	0.566466	0.578349	0.360158	0.795761	0.672682	0.706993	0.621459	0.392216
	0.285918	0.0622005	1.04406	High	P62834	Ras-related protein Rap-1A OS=Homo sapiens OX=9606	RAP1A			0.15544	0.726734	61.043	69	9	643	3	184	21	6.67	22	27	28	35	33	30	35	27	34	32	34	33	1		-0.542668	-0.436809	-0.730557	-0.526835	-0.471582	-0.525015	-0.624264	-0.484361	-0.372459
	0.479426	0.0621382	1.04401	High	Q9BSJ8	Extended synaptotagmin-1 OS=Homo sapiens OX=9606	ESYT1			0.685046	0.299037	188.507	38	26	1132	26	1104	122.8	5.83	63	65	62	77	79	84	71	74	67	86	73	86	1		3.49389	3.36622	3.52369	3.55342	3.46559	3.55119	3.55488	3.52141	3.62747
	0.073477	0.0619812	1.0439	High	Q6UX04	Spliceosome-associated protein CWC27 homolog OS=Homo sapiens OX=9606	CWC27			0.0402539	0.912171	7.127	7	2	19	2	472	53.8	5.8	3	1	1	3	1		3	5				2	1		-3.4234	-4.36421	-3.62764	-3.80591	-3.58954	-3.83385	-3.91066	-3.46548	-3.69657
	0.297413	0.0619545	1.04388	High	Q969H8	Myeloid-derived growth factor OS=Homo sapiens OX=9606	MYDGF			1.26742	0.148266	24.785	21	3	278	3	173	18.8	6.68	10	9	9	8	13	13	14	15	23	18	14	21	1		1.89924	1.7429	1.87807	1.98817	1.76583	1.95206	2.15184	1.973	2.23826
	0.488968	0.0619278	1.04386	High	Q96CX2	BTB/POZ domain-containing protein KCTD12 OS=Homo sapiens OX=9606	KCTD12			0.319011	0.539284	105.521	61	14	1017	14	325	35.7	5.64	49	46	42	43	49	44	48	58	46	42	54	53	1		3.49185	3.3643	3.48681	3.47238	3.58176	3.47461	3.4435	3.46419	3.51416
	0.540841	0.0618966	1.04384	High	Q9HAV7	GrpE protein homolog 1, mitochondrial OS=Homo sapiens OX=9606	GRPEL1			1.27969	0.146381	22.63	26	5	275	5	217	24.3	8.12	11	19	14	14	14	19	17	18	15	20	19	16	1		2.56267	2.71138	2.67585	2.72265	2.66717	2.74576	2.82122	2.74478	2.82098
	0.570846	0.0616945	1.04369	High	Q96D15	Reticulocalbin-3 OS=Homo sapiens OX=9606	RCN3			0.302544	0.554762	161.264	47	9	828	9	328	37.5	4.89	36	46	46	39	40	43	39	39	44	42	42	44	1		4.02574	3.97689	4.06899	4.14785	4.01085	4.09801	4.06015	4.01738	4.26722
	0.600479	0.0616315	1.04365	High	O15042	U2 snRNP-associated SURP motif-containing protein OS=Homo sapiens OX=9606	U2SURP			0.437748	0.434858	38.086	10	8	158	8	1029	118.2	8.47	4	8	12	6	2	6	4	5	6	5	4	3	1		3.39536	3.29191	3.3179	3.3382	3.45545	3.39642	3.32562	3.43872	3.45722
	0.282095	0.0614649	1.04352	High	P49840	Glycogen synthase kinase-3 alpha OS=Homo sapiens OX=9606	GSK3A			0.15722	0.725106	15.714	9	3	63	2	483	50.9	8.75	9	6	5	5	3	5	4	5	5	3	4	5	1		-3.00954	-3.14675	-3.27525	-3.10357	-3.14328	-3.0003	-3.16424	-3.10425	-2.94361
	0.625977	0.0612691	1.04338	High	Q9BS26	Endoplasmic reticulum resident protein 44 OS=Homo sapiens OX=9606	ERP44			1.41096	0.127499	87.202	27	9	569	9	406	46.9	5.26	36	35	37	39	32	43	39	36	45	43	40	40	1		2.73485	2.85681	2.87431	2.88088	2.89112	2.87776	2.94758	3.08588	2.95373
	0.10964	0.061224	1.04335	High	Q9H6T3	RNA polymerase II-associated protein 3 OS=Homo sapiens OX=9606	RPAP3			0.0964556	0.809291	18.873	10	5	77	5	665	75.7	6.84	3	8	9	5	8	5	4	6	8	5	7	6	1		-0.422591	-0.49425	-1.00173	-0.571227	-0.732334	-0.431337	-0.410435	-0.490729	-0.659967
	0.209164	0.0611757	1.04332	High	P46782	40S ribosomal protein S5 OS=Homo sapiens OX=9606	RPS5			0.236069	0.624896	138.522	53	8	1146	8	204	22.9	9.72	26	34	33	36	36	40	41	37	37	33	36	40	1	Met-loss+Acetyl [N-Term];Acetyl [N-Term]	3.45923	3.52588	3.2576	3.40845	3.63383	3.38394	3.4331	3.43532	3.17915
	0.273636	0.0610987	1.04326	High	P32322	Pyrroline-5-carboxylate reductase 1, mitochondrial OS=Homo sapiens OX=9606	PYCR1			0.593287	0.34093	48.699	35	8	214	7	319	33.3	7.61	13	6	14	17	13	16	12	15	18	10	10	19	1		1.15894	1.00594	1.23163	1.31272	1.1241	1.14299	1.30502	1.22345	1.29066
	0.190542	0.0610867	1.04325	High	O00165	HCLS1-associated protein X-1 OS=Homo sapiens OX=9606	HAX1			0.159495	0.720938	24.21	18	2	37	2	279	31.6	4.92	2	3	2	4	6	2	3	3	4	3	2	3	1		-1.69799	-1.27449	-1.46421	-1.42079	-1.43034	-1.4023	-1.20711	-1.55256	-1.33318
	0.547689	0.0610313	1.04321	High	Q8TCJ2	Dolichyl-diphosphooligosaccharide--protein glycosyltransferase subunit STT3B OS=Homo sapiens OX=9606	STT3B			0.852373	0.238446	79.439	14	9	725	9	826	93.6	8.91	41	44	41	39	41	36	34	40	28	28	32	42	1		2.10719	2.07982	1.97058	2.15958	2.11236	2.06874	2.11092	2.16767	2.19761
	0.742456	0.0610237	1.04321	High	P02794	Ferritin heavy chain OS=Homo sapiens OX=9606	FTH1			0.486627	0.402548	111.922	62	9	631	9	183	21.2	5.55	39	43	33	37	32	30	31	36	36	38	35	32	1		3.97566	4.07206	4.09442	4.10113	4.12765	4.09642	4.10369	4.05177	4.19453
	0.282507	0.0609099	1.04312	High	Q13148	TAR DNA-binding protein 43 OS=Homo sapiens OX=9606	TARDBP			0.0625346	0.868982	95.957	40	10	416	10	414	44.7	6.19	20	19	17	14	15	13	15	19	16	19	12	22	1		1.81148	1.63536	1.74471	1.66691	1.79803	1.90934	1.77348	1.97635	1.58084
	0.181534	0.0608406	1.04307	High	P21964	Catechol O-methyltransferase OS=Homo sapiens OX=9606	COMT			0.336373	0.521409	110.06	36	7	592	7	271	30	5.47	24	32	31	27	37	39	41	39	42	44	38	42	1		1.82111	1.74501	1.56755	1.83082	1.57145	1.91392	1.94076	1.82772	1.80145
	0.719685	0.0605876	1.04289	High	P56377	AP-1 complex subunit sigma-2 OS=Homo sapiens OX=9606	AP1S2			1.75476	0.0931355	9.135	11	2	53	2	157	18.6	5.47	4	3	5	5	4	2	5	4	3	5	7	4	1		-1.63619	-1.67391	-1.62385	-1.51729	-1.59688	-1.63802	-1.46466	-1.51437	-1.52444
	0.152543	0.0601851	1.0426	High	Q9Y5Q8	General transcription factor 3C polypeptide 5 OS=Homo sapiens OX=9606	GTF3C5			0.0613679	0.871043	30.716	17	7	215	7	519	59.5	6.9	9	13	4	7	6	10	8	7	8	6	6	9	1	Met-loss+Acetyl [N-Term]	-0.141265	-0.544305	-0.107459	-0.293115	-0.149303	-0.170055	-0.141464	-0.244439	-0.243793
	0.309113	0.0601323	1.04256	High	O00534	von Willebrand factor A domain-containing protein 5A OS=Homo sapiens OX=9606	VWA5A			0.477275	0.408896	19.259	8	4	47	4	786	86.4	6.58	5	3	2	5	6	3	4	2	3	4	2	1	1		-0.335742	-0.447513	-0.341945	-0.2088	-0.448606	-0.287395	-0.28186	-0.26265	-0.264059
	0.622885	0.0600065	1.04247	High	O94919	Endonuclease domain-containing 1 protein OS=Homo sapiens OX=9606	ENDOD1			0.106355	0.795138	4.668	4	1	8	1	500	55	5.71	1		2	1				1			1	2	1		-2.2523	-2.12041	-2.18869	-2.16498	-2.09383	-2.12257	-1.91583	-2.15466	-2.30412
	0.100374	0.0598481	1.04236	High	Q75QN2	Integrator complex subunit 8 OS=Homo sapiens OX=9606	INTS8			0.130605	0.760301	17.203	7	5	43	5	995	113	7.05	2	1				1	1	1	1	2			1		-1.51779	-1.5539	-1.6085	-1.57603	-1.82432	-1.1003	-1.19814	-1.6398	-1.36055
	0.214647	0.059831	1.04234	High	O60783	28S ribosomal protein S14, mitochondrial OS=Homo sapiens OX=9606	MRPS14			0.142102	0.743509	3.65	12	1	15	1	128	15.1	11.41	2	1	1	1	1	3		2	2	1		1	1		-2.66672	-2.93613	-2.92675	-2.66634	-2.80277	-2.88099	-2.61251	-2.78592	-2.86822
	0.380677	0.0598189	1.04233	High	Q9NVA2	Septin-11 OS=Homo sapiens OX=9606	SEPTIN11			0.0990159	0.804858	177.119	54	19	1131	10	429	49.4	6.81	72	66	60	72	66	75	72	74	71	84	68	71	1	Met-loss+Acetyl [N-Term]	4.25627	4.29363	4.30854	4.37984	4.43624	4.22181	4.31632	4.44789	4.1455
	0.142968	0.0597947	1.04232	High	Q8N3E9	1-phosphatidylinositol 4,5-bisphosphate phosphodiesterase delta-3 OS=Homo sapiens OX=9606	PLCD3			1.95507	0.0774886	8.086	7	3	59	3	789	89.2	6.98	3	3	3	2	5	7	5	5	6	6	5	4	1		-2.62459	-2.88451	-2.87328	-2.58209	-2.62822	-2.99269	-3.35318	-3.17629	-3.45332
	0.510334	0.0597178	1.04226	High	P06733	Alpha-enolase OS=Homo sapiens OX=9606	ENO1			0.488425	0.400831	404.546	71	27	11919	23	434	47.1	7.39	448	489	485	563	547	634	609	628	562	661	604	591	1	Met-loss+Acetyl [N-Term]	7.12018	7.07051	7.2271	7.18255	7.24296	7.17144	7.22342	7.22377	7.17016
	0.388488	0.0596835	1.04224	High	O75208	Ubiquinone biosynthesis protein COQ9, mitochondrial OS=Homo sapiens OX=9606	COQ9			0.262258	0.595971	22.393	12	2	32	2	318	35.5	5.94	2	3	2	1	2	3	2	4	4	3	2	4	1		-1.50934	-1.6724	-1.6183	-1.46388	-1.54258	-1.61454	-1.57221	-1.56277	-1.65617
	0.164497	0.0590852	1.0418	High	Q9NXE4	Sphingomyelin phosphodiesterase 4 OS=Homo sapiens OX=9606	SMPD4			0.109201	0.790187	31.475	12	6	86	6	866	97.7	8.27		3	4	1	1	4	1	3	4	1	2	3	1		-1.49856	-1.69425	-1.68951	-1.70454	-1.66904	-1.3315	-1.49922	-1.73371	-1.74767
	0.181436	0.0589892	1.04174	High	P17405	Sphingomyelin phosphodiesterase OS=Homo sapiens OX=9606	SMPD1			0.0996819	0.80369	20.374	9	4	90	4	631	69.9	7.28	7	4	4	5	8	7	8	5	4	9	7	7	1		-0.322795	-0.393121	-0.207799	-0.257487	-0.437372	-0.0518875	-0.317993	-0.325467	-0.0121193
	0.194013	0.0589364	1.0417	High	P62899	60S ribosomal protein L31 OS=Homo sapiens OX=9606	RPL31			0.848597	0.239378	39.081	40	5	682	5	125	14.5	10.54	16	17	21	20	19	26	20	22	18	26	21	23	1		3.10158	2.91763	2.99805	3.07449	3.2392	2.88039	3.2596	3.38966	3.12955
	0.788132	0.0587559	1.04157	High	P52815	39S ribosomal protein L12, mitochondrial OS=Homo sapiens OX=9606	MRPL12			0.464713	0.41586	17.068	12	3	207	3	198	21.3	8.87	9	8	8	10	10	9	9	7	10	6	9	6	1		1.62952	1.72951	1.71166	1.71827	1.76457	1.7641	1.78378	1.67903	1.98293
	0.322374	0.0579529	1.04099	High	P52594	Arf-GAP domain and FG repeat-containing protein 1 OS=Homo sapiens OX=9606	AGFG1			0.260741	0.597219	40.364	15	5	118	5	562	58.2	8.63	9	4	10	8	7	5	6	5	8	8	8	7	1		0.264459	0.0340452	0.0994749	0.226602	0.137188	0.208048	0.0744743	0.217227	0.0168476
	0.931322	0.0579077	1.04096	High	Q8TB61	Adenosine 3'-phospho 5'-phosphosulfate transporter 1 OS=Homo sapiens OX=9606	SLC35B2			1.21099	0.16102	15.362	12	4	96	4	432	47.5	9.16	7	8	7	9	6	9	9	7	7	6	6	11	1		0.325009	0.41545	0.390519	0.425508	0.422686	0.456509	0.666161	0.422212	0.68383
	0.153441	0.0579077	1.04096	High	Q9UJX5	Anaphase-promoting complex subunit 4 OS=Homo sapiens OX=9606	ANAPC4			0.040429	0.912117	38.05	15	6	45	6	808	92.1	5.53	5	3	3	2	3	2	4	3	6	1	3	2	1		-1.80889	-2.00076	-2.23429	-2.05773	-1.98757	-1.82491	-2.17329	-1.58958	-2.04894
	0.267464	0.057483	1.04065	High	Q8WZA0	Protein LZIC OS=Homo sapiens OX=9606	LZIC			0.181962	0.690407	25.565	31	4	81	4	190	21.5	4.94	12	7	6	9	5	6	3	7	6	5	5	6	1		0.970031	0.851245	1.1087	1.03453	0.959442	1.10845	1.1853	0.856347	1.2253
	0.115765	0.0574595	1.04063	High	O00488	Zinc finger protein 593 OS=Homo sapiens OX=9606	ZNF593			0.0364125	0.918757	5.648	10	1	7	1	134	15.2	9.82													1		-0.757071	-0.744174	-1.16621	-0.839747	-0.627785	-1.02754	-0.847591	-0.432014	-1.11948
	0.489488	0.057408	1.04059	High	Q99470	Stromal cell-derived factor 2 OS=Homo sapiens OX=9606	SDF2			1.27836	0.146227	24.437	22	2	83	2	211	23	7.33	4	2	4	3	1	4	4	5	6	6	4	5	1		-0.460582	-0.545577	-0.55823	-0.432979	-0.545048	-0.414139	-0.321369	-0.426618	-0.211096
	0.601897	0.0573724	1.04057	High	P54802	Alpha-N-acetylglucosaminidase OS=Homo sapiens OX=9606	NAGLU			0.764149	0.269945	63.349	21	10	254	10	743	82.2	6.65	18	9	13	15	16	20	28	19	15	13	18	20	1		0.662154	0.625848	0.529513	0.684258	0.631826	0.673548	0.644327	0.705171	0.792458
	0.442451	0.0573578	1.04056	High	Q9BT09	Protein canopy homolog 3 OS=Homo sapiens OX=9606	CNPY3			0.135114	0.753562	10.275	7	2	53	2	278	30.7	5.49	6	5	4	3	2	7	4	2	3	5	3	5	1		-0.680945	-0.511123	-0.599603	-0.591426	-0.504736	-0.523436	-0.740589	-0.47247	-0.309414
	0.273132	0.0572497	1.04048	High	Q9HCN8	Stromal cell-derived factor 2-like protein 1 OS=Homo sapiens OX=9606	SDF2L1			0.2932	0.563353	70.792	52	5	200	5	221	23.6	7.03	10	10	10	13	11	12	11	12	10	11	12	17	1		0.737781	0.786429	0.548024	0.828698	0.728609	0.686676	0.716639	0.750209	0.923908
	1.48529	0.0571499	1.04041	High	P33991	DNA replication licensing factor MCM4 OS=Homo sapiens OX=9606	MCM4			0.50072	0.392078	157.23	41	24	947	24	863	96.5	6.74	40	54	52	53	50	46	48	59	42	44	44	36	1		3.34826	3.35274	3.37377	3.41766	3.44192	3.38664	3.29027	3.44209	3.34503
	0.322563	0.0569324	1.04025	High	O95782	AP-2 complex subunit alpha-1 OS=Homo sapiens OX=9606	AP2A1			0.568533	0.355594	217.496	44	30	1590	23	977	107.5	7.03	52	67	60	49	48	64	63	67	64	60	68	66	1		2.93456	2.79833	2.9746	2.87873	3.04791	2.95165	3.04528	3.03051	2.9693
	0.224456	0.0569026	1.04023	High	Q92781	Retinol dehydrogenase 5 OS=Homo sapiens OX=9606	RDH5			0.324761	0.533873	6.899	9	2	20	2	318	35	9.35	1	2	1	1	1	2	2	2	2	3	1	2	1		-2.28892	-2.43031	-2.24954	-2.27286	-2.4053	-2.1199	-2.11574	-2.3579	-2.07336
	0.209415	0.0568956	1.04022	High	Q5JTZ9	Alanine--tRNA ligase, mitochondrial OS=Homo sapiens OX=9606	AARS2			0.148853	0.734227	43.956	16	9	138	9	985	107.3	6.27	13	8	11	9	12	11	9	12	11	14	9	17	1		-0.0159826	0.231019	0.137015	0.199069	0.293039	0.0306301	0.214405	0.067811	0.341728
	0.0260681	0.0568466	1.04019	High	Q9ULU4	Protein kinase C-binding protein 1 OS=Homo sapiens OX=9606	ZMYND8			0.0961126	0.809672	62.588	17	11	72	11	1186	131.6	7.2													1		-4.48998	-3.60462	-3.60004	-3.23264	-3.11514	-5.17632	-3.68269	-3.15954	-3.69616
	0.230726	0.0568415	1.04019	High	P13473	Lysosome-associated membrane glycoprotein 2 OS=Homo sapiens OX=9606	LAMP2			0.692646	0.296078	21.962	9	4	391	4	410	44.9	5.63	24	16	14	18	14	15	18	17	20	18	19	20	1		2.71889	2.65076	2.47122	2.79135	2.63574	2.58429	2.87152	2.7465	2.74273
	0.176736	0.0567869	1.04015	High	P62316	Small nuclear ribonucleoprotein Sm D2 OS=Homo sapiens OX=9606	SNRPD2			0.0790386	0.839933	42.972	49	6	457	6	118	13.5	9.91	21	21	21	24	13	19	15	21	14	22	23	18	1		2.29349	2.2835	2.01813	2.14124	2.41454	2.20971	2.22635	2.35564	2.18636
	0.323128	0.0567525	1.04012	High	Q93034	Cullin-5 OS=Homo sapiens OX=9606	CUL5			0.446672	0.427055	22.07	7	4	52	4	780	90.9	7.94	7	3	7	4	3	3	3	6	3	2	4	4	1		-1.08997	-1.15071	-1.29069	-1.16669	-1.15543	-1.03899	-1.14095	-0.934573	-1.0909
	0.0962006	0.0566928	1.04008	High	Q6DKJ4	Nucleoredoxin OS=Homo sapiens OX=9606	NXN			0.709319	0.290216	3.625	3	1	3	1	435	48.4	4.97				1	1		1						1	Met-loss+Acetyl [N-Term]	-5.43606	-5.10274	-5.24675	-5.01337	-5.02209	-5.58001	-5.29739	-5.76433	-5.80927
	0.0971894	0.0566292	1.04003	High	Q14966	Zinc finger protein 638 OS=Homo sapiens OX=9606	ZNF638			0.0111145	0.976342	27.344	7	7	33	7	1978	220.5	6.38													1		-3.04013	-3.45897	-3.27564	-3.28932	-3.44187	-2.87365	-2.91038	-3.66136	-3.10758
	0.283275	0.0565046	1.03994	High	Q9H2M9	Rab3 GTPase-activating protein non-catalytic subunit OS=Homo sapiens OX=9606	RAB3GAP2			0.125009	0.768374	55.894	13	13	242	13	1393	155.9	5.62	22	13	17	22	17	13	17	27	23	20	15	22	1	Met-loss+Acetyl [N-Term]	0.918698	0.969747	1.00314	0.975953	0.915697	1.16945	1.06574	0.93666	0.949301
	0.231621	0.0562592	1.03977	High	Q9NYL4	Peptidyl-prolyl cis-trans isomerase FKBP11 OS=Homo sapiens OX=9606	FKBP11			1.74662	0.0944648	12.755	14	2	114	2	201	22.2	9.39	4	5	3	6	3	2	4	5	3	4	3	6	1		-1.32044	-1.27508	-1.17924	-1.14516	-1.37048	-1.09035	-0.826809	-1.02479	-0.862661
	0.0752801	0.0561142	1.03966	High	Q9BXP2	Solute carrier family 12 member 9 OS=Homo sapiens OX=9606	SLC12A9			0.508411	0.388131	21.965	8	5	165	5	914	96	8.07	4	6	6	4	5	6	3	3	5	8	4	5	1		-1.44053	-1.29049	-1.18745	-1.16065	-1.72329	-0.866182	-0.975916	-1.05227	-0.854364
	0.955042	0.055886	1.0395	High	Q01844	RNA-binding protein EWS OS=Homo sapiens OX=9606	EWSR1			0.67538	0.302541	62.118	12	5	356	5	656	68.4	9.33	14	18	16	17	10	15	17	14	16	14	17	21	1		2.39184	2.3108	2.35479	2.42904	2.41487	2.38117	2.35027	2.42058	2.38571
	0.477224	0.0555267	1.03924	High	P26599	Polypyrimidine tract-binding protein 1 OS=Homo sapiens OX=9606	PTBP1			0.178729	0.695032	277.355	63	19	1572	18	557	59.6	9.16	65	73	67	68	58	68	67	80	78	76	72	72	1	Acetyl [N-Term]	4.48786	4.46864	4.45158	4.46241	4.62241	4.48984	4.49347	4.61974	4.42516
	0.0747341	0.0554333	1.03917	High	Q9NUY8	TBC1 domain family member 23 OS=Homo sapiens OX=9606	TBC1D23			0.088298	0.822721	23.108	13	5	47	5	699	78.3	5.41	7	3	5	6	3	4	4	6	2	1	3	3	1		-1.01495	-1.06713	-1.76942	-1.29013	-1.35	-1.04507	-1.29761	-0.98006	-1.13901
	0.0975258	0.0550454	1.03889	High	P62312	U6 snRNA-associated Sm-like protein LSm6 OS=Homo sapiens OX=9606	LSM6			0.0751151	0.845171	4.816	14	1	62	1	80	9.1	9.58	3	4	5	4	5	3	3	4	4	3	5	2	1		-2.07476	-1.89914	-2.04022	-2.07098	-1.56823	-2.20978	-1.87278	-1.79998	-2.02988
	0.498911	0.054938	1.03881	High	P35241	Radixin OS=Homo sapiens OX=9606	RDX			0.355838	0.504976	154.104	39	22	2414	11	583	68.5	6.37	130	132	137	141	132	155	139	151	151	136	161	129	1		2.88541	2.86702	2.97335	2.90355	3.0253	2.96174	2.95656	2.9589	2.91871
	0.245348	0.0547733	1.0387	High	Q86SF2	N-acetylgalactosaminyltransferase 7 OS=Homo sapiens OX=9606	GALNT7			0.334369	0.523842	48.2	16	7	262	7	657	75.3	7.11	19	20	17	16	20	22	26	19	21	22	24	24	1		2.07237	1.89724	1.92221	2.15621	1.96433	1.9356	2.19547	1.95318	2.10997
	0.576166	0.0547727	1.0387	High	P23229	Integrin alpha-6 OS=Homo sapiens OX=9606	ITGA6			0.568364	0.355601	57.674	16	12	314	12	1130	126.5	6.61	15	17	18	17	16	17	16	18	22	12	15	22	1		1.45634	1.46066	1.53613	1.59822	1.48231	1.53691	1.54864	1.5192	1.71708
	0.333002	0.0545985	1.03857	High	O60888	Protein CutA OS=Homo sapiens OX=9606	CUTA			0.133808	0.755603	50.512	33	3	179	3	179	19.1	5.5	13	10	12	9	12	9	14	10	9	12	11	10	1		1.37368	1.37317	1.1906	1.31246	1.37632	1.41246	1.29631	1.30357	1.46498
	0.247131	0.0543569	1.0384	High	Q08378	Golgin subfamily A member 3 OS=Homo sapiens OX=9606	GOLGA3			0.220341	0.642705	98.581	18	18	192	18	1498	167.3	5.44	24	11	22	17	21	7	7	17	14	11	16	15	1		2.90253	2.85941	3.13826	3.02642	3.03131	3.00554	3.11746	2.94004	3.10972
	0.354761	0.0543391	1.03838	High	P15586	N-acetylglucosamine-6-sulfatase OS=Homo sapiens OX=9606	GNS			0.841823	0.24051	169.172	32	13	1136	13	552	62	8.31	57	63	67	62	64	68	66	57	75	66	70	63	1		3.47754	3.3435	3.43954	3.57373	3.41974	3.43013	3.56179	3.4922	3.68513
	1.46028	0.0541871	1.03827	High	Q15293	Reticulocalbin-1 OS=Homo sapiens OX=9606	RCN1			0.873211	0.231443	298.193	74	19	2648	19	331	38.9	5	129	142	136	143	138	157	147	147	135	158	156	150	1		6.12869	6.1389	6.1374	6.21573	6.15771	6.1941	6.20065	6.17776	6.33954
	0.620747	0.054149	1.03825	High	Q13405	39S ribosomal protein L49, mitochondrial OS=Homo sapiens OX=9606	MRPL49			0.617055	0.329205	29.862	30	4	194	4	166	19.2	9.45	13	9	14	14	12	7	12	11	14	10	8	15	1		0.915254	0.907901	0.964696	0.944367	1.05311	0.952816	0.966166	0.983357	1.00709
	0.101091	0.0541134	1.03822	High	Q9BVP2	Guanine nucleotide-binding protein-like 3 OS=Homo sapiens OX=9606	GNL3			1.38306	0.129742	57.329	25	10	263	9	549	62	9.16	2	1	1	1			3	1	6	6	3	1	1		-0.824012	-1.05842	-0.808341	-1.18143	-0.60075	-0.746258	-0.344923	-0.152167	-0.534592
	0.337459	0.0541096	1.03822	High	P54886	Delta-1-pyrroline-5-carboxylate synthase OS=Homo sapiens OX=9606	ALDH18A1			0.703242	0.292627	228.348	46	25	1248	25	795	87.2	7.12	65	82	77	90	84	88	86	92	74	96	85	107	1		4.11076	4.12701	4.19745	4.27414	4.07912	4.24428	4.25358	4.21711	4.38688
	0.209156	0.054018	1.03815	High	Q99943	1-acyl-sn-glycerol-3-phosphate acyltransferase alpha OS=Homo sapiens OX=9606	AGPAT1			0.359888	0.500643	11.227	18	3	76	3	283	31.7	9.38	5	8	7	6	9	10	7	5	5	3	4	7	1		-1.51746	-1.44152	-1.2257	-1.29228	-1.43815	-1.2922	-1.35786	-1.32288	-1.006
	0.278129	0.0539608	1.03811	High	Q9UJX3	Anaphase-promoting complex subunit 7 OS=Homo sapiens OX=9606	ANAPC7			0.194405	0.675521	40.246	18	7	169	7	565	63.1	5.72	10	12	10	13	12	12	14	8	7	8	8	10	1	Acetyl [N-Term]	0.607144	0.420489	0.384618	0.494878	0.597126	0.48213	0.35323	0.431447	0.558908
	0.189399	0.0537357	1.03795	High	Q969T4	Ubiquitin-conjugating enzyme E2 E3 OS=Homo sapiens OX=9606	UBE2E3			0.37051	0.49144	20.754	20	3	135	3	207	22.9	7.18	7	11	8	10	6	10	10	8	9	8	9	9	1		0.0924425	-0.156621	-0.10275	-0.0572767	-0.100239	0.151794	-0.0477886	0.10399	0.24057
	0.823409	0.0535164	1.03779	High	P07686	Beta-hexosaminidase subunit beta OS=Homo sapiens OX=9606	HEXB			2.6246	0.0556721	66.76	22	9	748	9	556	63.1	6.76	36	46	42	40	38	37	41	48	39	54	45	38	1		3.16997	3.17292	3.15027	3.16907	3.21439	3.27025	3.32493	3.30825	3.35419
	0.0580375	0.053503	1.03778	High	Q9UL54	Serine/threonine-protein kinase TAO2 OS=Homo sapiens OX=9606	TAOK2			0.12521	0.768322	12.38	4	3	12	3	1235	138.2	7.27	4	2	1		1	3					1		1		-2.85168	-3.63858	-2.77525	-2.81421	-2.945	-3.34579	-3.01666	-3.67292	-3.10614
	0.506877	0.0534369	1.03773	High	Q9HBM1	Kinetochore protein Spc25 OS=Homo sapiens OX=9606	SPC25			1.61923	0.107993	19.952	23	4	109	4	224	26.1	8	6	8	13	12	12	8	10	12	6	7	8	7	1		-0.49285	-0.607621	-0.596526	-0.462214	-0.559681	-0.514791	-0.358459	-0.374879	-0.455908
	0.519747	0.053201	1.03756	High	Q3ZCQ8	Mitochondrial import inner membrane translocase subunit TIM50 OS=Homo sapiens OX=9606	TIMM50			1.00784	0.199683	37.484	24	6	278	6	353	39.6	8.37	16	14	19	17	18	16	24	19	21	19	20	18	1		1.81613	1.89901	1.87754	1.93564	1.97128	1.84536	1.95316	2.05625	1.9507
	0.200435	0.0531661	1.03754	High	Q9H936	Mitochondrial glutamate carrier 1 OS=Homo sapiens OX=9606	SLC25A22			0.587407	0.344139	14.5	17	2	64	2	323	34.4	9.29	4	3	2	4	3	2	4	2	2	2	2	3	1		-1.74882	-1.74021	-1.59115	-1.46875	-1.68842	-1.76352	-1.63882	-1.45742	-1.46058
	1.87147	0.0531584	1.03753	High	Q96HE7	ERO1-like protein alpha OS=Homo sapiens OX=9606	ERO1A			1.78281	0.0919364	211.209	62	21	1418	21	468	54.4	5.68	77	76	79	74	90	82	82	84	81	89	92	84	1		4.15413	4.12645	4.14045	4.19874	4.20711	4.17467	4.23901	4.23808	4.35291
	0.103705	0.0530599	1.03746	High	Q8NBL1	Protein O-glucosyltransferase 1 OS=Homo sapiens OX=9606	POGLUT1			0.0650185	0.863651	16.474	12	3	75	3	392	46.2	8.72	3	4	4	8	4	5	5	6	2	6	7	6	1		-1.7647	-1.16048	-1.56858	-1.52159	-1.45472	-1.35827	-1.4851	-1.60846	-1.49392
	0.581439	0.0530542	1.03746	High	O75391	Sperm-associated antigen 7 OS=Homo sapiens OX=9606	SPAG7			0.431226	0.440419	34.896	31	4	92	4	227	26	7.91	8	8	5	5	4	7	6	7	5	4	5	6	1	Met-loss+Acetyl [N-Term]	1.11792	1.18287	1.2343	1.21605	1.20188	1.27633	1.11429	1.24765	1.1118
	0.62958	0.0529639	1.03739	High	Q03001	Dystonin OS=Homo sapiens OX=9606	DST			0.976264	0.20411	249.471	10	51	1038	49	7570	860.1	5.25	54	46	50	41	48	60	44	47	52	43	50	52	1		2.47199	2.48055	2.46353	2.58913	2.45904	2.5268	2.52853	2.65295	2.56858
	0.49143	0.0529219	1.03736	High	P10515	Dihydrolipoyllysine-residue acetyltransferase component of pyruvate dehydrogenase complex, mitochondrial OS=Homo sapiens OX=9606	DLAT			1.27164	0.147571	81.363	21	9	602	9	647	69	7.84	27	22	31	34	31	33	32	28	38	32	25	37	1		2.8393	2.78667	2.70302	2.87211	2.78531	2.83032	2.90693	2.87184	2.96613
	0.158152	0.052906	1.03735	High	P29218	Inositol monophosphatase 1 OS=Homo sapiens OX=9606	IMPA1			0.185536	0.686814	9.316	11	2	19	2	277	30.2	5.26	2	3	3	1	1	1	1	1	1	2	2	1	1		-1.76417	-1.57777	-1.33225	-1.50821	-1.51903	-1.48823	-1.76347	-1.76696	-1.39472
	0.537429	0.0528412	1.03731	High	P19784	Casein kinase II subunit alpha' OS=Homo sapiens OX=9606	CSNK2A2			0.314128	0.543697	55.94	29	7	235	7	350	41.2	8.56	16	20	10	17	12	14	10	12	11	14	11	13	1		1.48759	1.56927	1.61565	1.57028	1.61496	1.6458	1.46894	1.66382	1.44451
	0.354914	0.0528043	1.03728	High	P00167	Cytochrome b5 OS=Homo sapiens OX=9606	CYB5A			0.213528	0.6512	38.226	43	4	178	4	134	15.3	4.96	14	9	18	13	12	15	11	11	15	9	11	11	1		1.57528	1.5333	1.72008	1.71122	1.62797	1.64789	1.68233	1.58745	1.72487
	0.268811	0.0524597	1.03703	High	Q5JPE7	Nodal modulator 2 OS=Homo sapiens OX=9606	NOMO2			0.168076	0.708628	150.73	30	22	943	22	1267	139.4	5.76	28	29	26	26	32	27	27	38	35	37	33	34	1		2.76389	2.84561	2.65684	2.76732	2.91817	2.73823	2.59282	2.86016	2.73007
	0.338398	0.0524031	1.03699	High	P20645	Cation-dependent mannose-6-phosphate receptor OS=Homo sapiens OX=9606	M6PR			0.95749	0.208397	44.221	22	5	284	5	277	31	5.83	15	17	14	18	18	21	22	16	11	21	23	19	1		1.36324	1.32088	1.5257	1.4743	1.42812	1.46462	1.5307	1.52332	1.75551
	0.0760974	0.0523148	1.03693	High	Q9H0L4	Cleavage stimulation factor subunit 2 tau variant OS=Homo sapiens OX=9606	CSTF2T			0.118577	0.776729	53.957	28	8	170	4	616	64.4	7.25	9	8	8	4	10	9	7	11	10	10	10	7	1		-1.56898	-1.95451	-1.4997	-2.00372	-1.35342	-1.5091	-1.76154	-1.55888	-2.0546
	0.262213	0.0523116	1.03693	High	Q9UNP9	Peptidyl-prolyl cis-trans isomerase E OS=Homo sapiens OX=9606	PPIE			1.54864	0.114563	38.417	27	4	117	4	301	33.4	5.6	9	9	9	7	6	6	6	8	4	4	10	4	1		0.0208597	0.130134	0.0597658	0.00392628	0.108646	0.255121	-0.132504	-0.073823	-0.277748
	0.351689	0.0522645	1.03689	High	Q9Y3U8	60S ribosomal protein L36 OS=Homo sapiens OX=9606	RPL36			0.556198	0.360973	50.15	30	5	907	5	105	12.2	11.59	18	21	21	21	24	24	26	27	30	34	30	33	1		3.84453	3.77717	3.89012	3.78506	3.9463	3.93726	3.9417	3.92499	3.91632
	0.853242	0.0522035	1.03685	High	O00116	Alkyldihydroxyacetonephosphate synthase, peroxisomal OS=Homo sapiens OX=9606	AGPS			0.410574	0.456668	97.378	37	17	499	17	658	72.9	7.34	35	20	34	41	39	31	28	28	34	29	36	36	1		2.47643	2.49997	2.49309	2.58988	2.49442	2.5418	2.5568	2.68687	2.47284
	0.197641	0.0521088	1.03678	High	Q9UFN0	Protein NipSnap homolog 3A OS=Homo sapiens OX=9606	NIPSNAP3A			2.75055	0.0574583	22.542	21	3	78	3	247	28.4	9.16	7	4	5	5	6	7	5	4	8	7	5	8	1		-1.36645	-1.2088	-1.26215	-1.07819	-1.21313	-1.38975	-0.56773	-0.765185	-0.753571
	0.237139	0.0520922	1.03677	High	Q14746	Conserved oligomeric Golgi complex subunit 2 OS=Homo sapiens OX=9606	COG2			0.188604	0.682214	39.72	17	6	82	6	738	83.2	6.62	6	6	5	8	9	7	7	7	4	8	7	8	1		-0.671969	-0.543427	-0.681197	-0.716979	-0.462343	-0.560995	-0.634827	-0.63754	-0.661926
	0.248321	0.0520433	1.03673	High	O15372	Eukaryotic translation initiation factor 3 subunit H OS=Homo sapiens OX=9606	EIF3H			0.303586	0.553373	79.549	51	13	796	13	352	39.9	6.54	26	34	26	32	32	32	27	32	26	34	36	25	1		2.8286	2.58148	2.78378	2.78561	2.83977	2.7246	2.7856	2.84848	2.81902
	1.03781	0.0519085	1.03664	High	Q53H12	Acylglycerol kinase, mitochondrial OS=Homo sapiens OX=9606	AGK			1.28422	0.14583	70.106	40	10	292	10	422	47.1	8.09	12	19	15	23	16	23	18	21	20	17	20	19	1		1.91593	1.97729	1.92448	1.98381	1.97221	2.0174	1.98148	2.08318	2.11628
	0.158663	0.0518939	1.03662	High	Q00839	Heterogeneous nuclear ribonucleoprotein U OS=Homo sapiens OX=9606	HNRNPU			0.217128	0.646545	292.854	41	24	2259	24	825	90.5	6	37	42	36	49	40	38	51	51	39	48	59	40	1		3.6371	3.53174	3.74085	3.48521	3.84676	3.7334	3.80316	3.80619	3.64239
	0.218806	0.0515537	1.03638	High	P09496	Clathrin light chain A OS=Homo sapiens OX=9606	CLTA			0.203648	0.662989	14.023	13	4	793	4	248	27.1	4.51	29	41	31	34	27	33	36	44	32	37	39	42	1		3.31889	3.00823	3.22105	3.22909	3.24007	3.23367	3.23878	3.31316	3.22784
[truncated: 3,035 more rows]

## Sheet: Ratio TMP 3 µM vs Ctl
Significant	-LOG(P-value)	Difference log2	Ratio TMP 3/Ctl	Protein FDR Confidence: Combined	Accession	Description	Gene Name	ANOVA Significant	Cluster	-Log ANOVA P value	ANOVA q-value	Sum PEP Score	Coverage [%]	# Peptides	# PSMs	# Unique Peptides	# AAs	MW [kDa]	calc. pI	PSMs S01	PSMs S01bis	PSMs S02	PSMs S03	PSMs S04	PSMs S04bis	PSMs S05	PSMs S06	PSMs S07	PSMs S07bis	PSMs S08	PSMs S09	# Protein Groups	Modifications	XIC S01	XIC S02	XIC S03	XIC S04	XIC S05	XIC S06	XIC S07	XIC S08	XIC S09
[truncated: 4,514 more rows]
