# Supplementary material for: Microsatellite expansions hidden within the human dark genome are translated in novel and toxic proteins causing muscle and neurodegenerative diseases
Source: Research Square preprint supplement (doi:10.21203/rs.3.rs-6122917/v1), 2025-04-17
Supplement: Supplementary file 4 [file fe6652959f7326d0fec9428e.xlsx]

## Sheet: S24089_gene_alldata
Gene ID	CTL #1 TVWB11 (raw)	CTL #2 TVWB12 (raw)	CTL #3 TVWB13 (raw)	TMP 3µM 18h #1 TVWB20 (raw)	TMP 3µM 18h #2 TVWB21 (raw)	TMP 3µM 18h #3 TVWB22 (raw)	CTL #1 TVWB11 (normalized)	CTL #2 TVWB12 (normalized)	CTL #3 TVWB13 (normalized)	TMP 3µM 18h #1 TVWB20 (normalized)	TMP 3µM 18h #2 TVWB21 (normalized)	TMP 3µM 18h #3 TVWB22 (normalized)	CTL #1 TVWB11 (normalized and divided by median of transcripts length in kb)	CTL #2 TVWB12 (normalized and divided by median of transcripts length in kb)	CTL #3 TVWB13 (normalized and divided by median of transcripts length in kb)	TMP 3µM 18h #1 TVWB20 (normalized and divided by median of transcripts length in kb)	TMP 3µM 18h #2 TVWB21 (normalized and divided by median of transcripts length in kb)	TMP 3µM 18h #3 TVWB22 (normalized and divided by median of transcripts length in kb)	CTL #1 TVWB11 (TPM)	CTL #2 TVWB12 (TPM)	CTL #3 TVWB13 (TPM)	TMP 3µM 18h #1 TVWB20 (TPM)	TMP 3µM 18h #2 TVWB21 (TPM)	TMP 3µM 18h #3 TVWB22 (TPM)	Chromosome name	Start gene position	End gene position	Median of transcripts length	Gene name	Gene biotype	Description	GO:biological_process	GO:molecular_function	GO:cellular_component	Shrunken Log2 FC (LH_TMP18h vs LH_CTL)	Log2 FC (LH_TMP18h vs LH_CTL)	P-value (LH_TMP18h vs LH_CTL)	Adjusted p-value (LH_TMP18h vs LH_CTL)
ENSG00000239264	124	135	91	182	250	143	91.8671	111.729	91.324	203.646	270.59	157.658	70.6127	85.8793	70.1953	156.53	207.986	121.182	1.94801	2.34688	1.93696	4.3253	5.71249	3.29801	6	7881517	7910788	1301	TXNDC5	protein_coding	thioredoxin domain containing 5	negative regulation of apoptotic process; protein folding	protein disulfide isomerase activity; isomerase activity; oxidoreductase activity; protein binding; protein-disulfide reductase activity	endoplasmic reticulum; endoplasmic reticulum lumen; extracellular region; extracellular exosome; lysosomal lumen; azurophil granule lumen	1.03496	1.09888	1.65383e-09	4.50383e-05
ENSG00000249992	1872	1843	1320	1558	1686	1701	1386.9	1525.31	1324.7	1743.3	1824.86	1875.36	761.195	837.161	727.058	956.804	1001.57	1029.29	20.9993	22.8776	20.0623	26.4388	27.5088	28.0123	3	45224466	45226287	1822	TMEM158	protein_coding	transmembrane protein 158		peptide binding	membrane	0.339407	0.360449	2.45762e-09	4.50383e-05
ENSG00000166337	353	415	284	383	481	383	261.525	343.463	285.011	428.551	520.616	422.259	376.024	493.836	409.793	616.177	748.549	607.131	10.3735	13.4954	11.3078	17.0264	20.5594	16.5232	11	6606294	6612539	695.5	TAF10	protein_coding	TATA-box binding protein associated factor 10	DNA-templated transcription initiation; chromatin remodeling; transcription by RNA polymerase II; transcription initiation at RNA polymerase II promoter; RNA polymerase II preinitiation complex assembly; positive regulation of transcription initiation by RNA polymerase II; regulation of DNA repair; regulation of transcription by RNA polymerase II; mRNA transcription by RNA polymerase II; positive…	enzyme binding; identical protein binding; protein binding; histone acetyltransferase activity; nuclear estrogen receptor binding; RNA polymerase II general transcription initiation factor activity; RNA polymerase binding; promoter-specific chromatin binding; DNA binding	nucleus; nucleoplasm; intracellular organelle; SAGA complex; transcription factor TFIID complex; transcription factor TFTC complex; cytoplasm; perinuclear region of cytoplasm; male germ cell nucleus; transcription preinitiation complex	0.580012	0.624941	4.57056e-08	0.000558401
ENSG00000221869	2655	2713	2000	2201	2219	2337	1966.99	2245.34	2007.12	2462.77	2401.76	2576.55	1571.08	1793.4	1603.13	1967.07	1918.34	2057.95	43.3418	49.0094	44.2366	54.3548	52.6885	56.0077	8	47736913	47738164	1252	CEBPD	protein_coding	CCAAT enhancer binding protein delta	regulation of DNA-templated transcription; DNA-templated transcription; regulation of transcription by RNA polymerase II; transcription by RNA polymerase II; integrated stress response signaling; regulation of cell differentiation; hematopoietic progenitor cell differentiation; fat cell differentiation; positive regulation of osteoblast differentiation; negative regulation of DNA-templated transc…	DNA-binding transcription factor activity; DNA binding; protein binding; RNA polymerase II cis-regulatory region sequence-specific DNA binding; DNA-binding transcription factor activity, RNA polymerase II-specific; sequence-specific double-stranded DNA binding; transcription cis-regulatory region binding; DNA-binding transcription activator activity, RNA polymerase II-specific; identical protein …	nucleus; chromatin; nucleoplasm; RNA polymerase II transcription regulator complex	0.233526	0.258587	2.77968e-06	0.0247983
ENSG00000263934	26	19	8	29	42	90	19.2625	15.7248	8.02849	32.4491	45.4592	99.2254	27.5572	22.4962	11.4857	46.4221	65.0346	141.953	0.760227	0.614766	0.316934	1.28275	1.78622	3.8633	17	19188016	19188714	699	SNORD3A	snoRNA	small nucleolar RNA, C/D box 3A	RNA processing		nucleolus	1.81143	2.02025	3.83796e-06	0.0247983
ENSG00000173457	11397	10103	8221	8125	9144	8309	8443.62	8361.46	8250.27	9091.33	9897.11	9160.71	9177.85	9088.55	8967.69	9881.88	10757.7	9957.3	253.192	248.368	247.453	273.06	295.468	270.991	11	64244479	64246943	920	PPP1R14B	protein_coding	protein phosphatase 1 regulatory inhibitor subunit 14B	regulation of phosphorylation; innate immune response	protein phosphatase inhibitor activity; protein serine/threonine phosphatase inhibitor activity	cytoplasm	0.148373	0.167872	4.05953e-06	0.0247983
ENSG00000277443	7853	6924	5611	5708	6292	5590	5818	5730.45	5630.98	6386.87	6810.22	6163	1354.28	1333.9	1310.75	1486.7	1585.25	1434.59	37.361	36.4524	36.1686	41.0811	43.5399	39.0428	6	113857345	113863475	4296	MARCKS	protein_coding	myristoylated alanine rich protein kinase C substrate	actin filament organization; central nervous system development; apoptotic process; mitochondrion organization; neural tube development; neurogenesis; response to endoplasmic reticulum stress; actin filament bundle assembly; actin crosslink formation	calmodulin binding; actin binding; actin filament binding; protein kinase C binding; identical protein binding	cytoplasm; membrane; cytoskeleton; focal adhesion; plasma membrane; extracellular exosome; actin cytoskeleton; actin filament bundle; centrosome; cell cortex; germinal vesicle; organelle	0.151089	0.17215	7.63529e-06	0.0399784
ENSG00000135363	1960	1895	1515	1530	1584	1802	1452.09	1568.34	1520.39	1711.97	1714.46	1986.71	946.297	1022.05	990.808	1115.65	1117.28	1294.7	26.1058	27.9303	27.3402	30.8281	30.6867	35.2356	11	33858576	33892076	1534.5	LMO2	protein_coding	LIM domain only 2	positive regulation of transcription by RNA polymerase II	protein binding; metal ion binding; transcription coactivator activity; bHLH transcription factor binding; RNA polymerase II-specific DNA-binding transcription factor binding; DNA-binding transcription factor binding; transcription coregulator binding; identical protein binding	nucleus; nucleoplasm; transcription regulator complex	0.223425	0.25407	1.36395e-05	0.0624891
ENSG00000125730	4612	3993	3475	3580	3556	3311	3416.86	3304.69	3487.37	4005.78	3848.88	3650.39	4805.71	4647.95	4904.89	5634.01	5413.33	5134.17	132.577	127.017	135.345	155.681	148.681	139.728	19	6677704	6730562	711	C3	protein_coding	complement C3	inflammatory response; complement activation; lipid metabolic process; fatty acid metabolic process; positive regulation of protein phosphorylation; immune system process; innate immune response; immune response; complement activation, classical pathway; complement activation, alternative pathway; G protein-coupled receptor signaling pathway; signal transduction; positive regulation of type IIa h…	protein binding; endopeptidase inhibitor activity; signaling receptor binding; C5L2 anaphylatoxin chemotactic receptor binding	extracellular region; extracellular space; plasma membrane; extracellular exosome; blood microparticle; secretory granule lumen; endoplasmic reticulum lumen; azurophil granule lumen; cell surface; protein-containing complex	0.148874	0.172798	5.05305e-05	0.205783
ENSG00000183578	1498	1335	1061	1103	1129	1254	1109.81	1104.87	1064.78	1234.18	1221.99	1382.54	503.089	500.85	482.674	559.467	553.937	626.718	13.8788	13.687	13.3188	15.4594	15.2143	17.0563	15	51056598	51105276	2206	TNFAIP8L3	protein_coding	TNF alpha induced protein 8 like 3	regulation of apoptotic process; lipid transport; intermembrane lipid transfer; positive regulation of ERK1 and ERK2 cascade; phospholipid transport; phospholipid metabolic process; 1-phosphatidyl-1D-myo-inositol 4,5-bisphosphate metabolic process	protein binding; phosphatidylinositol transfer activity; phosphatidylinositol binding	cytoplasm; membrane; nucleoplasm; cytosol; plasma membrane	0.192091	0.22602	7.87968e-05	0.288806
ENSG00000166033	61805	55532	44212	43187	44576	44045	45789.1	45959.5	44369.4	48323.4	48247.3	48559.8	27500.9	27603.3	26648.3	29023	28977.4	29165.1	758.676	754.332	735.329	801.975	795.883	793.735	10	122458551	122514907	1665	HTRA1	protein_coding	HtrA serine peptidase 1	proteolysis; positive regulation of apoptotic process; programmed cell death; placenta development; negative regulation of transforming growth factor beta receptor signaling pathway; negative regulation of BMP signaling pathway; chorionic trophoblast cell differentiation	protein binding; serine-type endopeptidase activity; peptidase activity; hydrolase activity; growth factor binding; serine-type peptidase activity; identical protein binding; molecular function activator activity	extracellular region; cytoplasm; membrane; plasma membrane; cytosol; collagen-containing extracellular matrix; extracellular exosome; extracellular space	0.0826625	0.0923747	0.000136248	0.45398
ENSG00000277027	65	52	26	72	144	228	48.1561	43.0363	26.0926	80.5632	155.86	251.371	182.41	163.016	98.8355	305.164	590.379	952.163	5.03218	4.45485	2.72725	8.43239	16.2152	25.9134	9	35657754	35658017	264	RMRP	ribozyme	RNA component of mitochondrial RNA processing endoribonuclease	rRNA processing	ribonuclease MRP activity	ribonuclease MRP complex	1.7031	2.05205	0.000170492	0.488726
ENSG00000251539	14	8	10	0	0	0	10.3721	6.62097	10.0356	0	0	0	15.4577	9.86732	14.9562	0	0	0	0.426435	0.26965	0.412699	0	0	0	4	49561479	49562149	671	SNX18P24	processed_pseudogene	sorting nexin 18 pseudogene 24				-3.00409e-06	-5.47454	0.000173345	0.488726
ENSG00000112941	1692	1544	1340	1280	1394	1341	1253.54	1277.85	1344.77	1432.23	1508.81	1478.46	1691.69	1724.49	1814.81	1932.84	2036.18	1995.22	46.6691	47.1262	50.0775	53.4089	55.9252	54.3005	5	6713432	6757044	741	TENT4A	protein_coding	terminal nucleotidyltransferase 4A	RNA polyadenylation; mRNA processing; double-strand break repair; RNA metabolic process; mitotic chromosome condensation; sister chromatid cohesion; response to xenobiotic stimulus; positive regulation of 3'-UTR-mediated mRNA stabilization; negative regulation of nuclear-transcribed mRNA poly(A) tail shortening; RNA 3'-end processing; RNA 3' uridylation	nucleotidyltransferase activity; RNA adenylyltransferase activity; metal ion binding; nucleotide binding; ATP binding; transferase activity; SMC family protein binding; guanylyltransferase activity	nucleus; cytoplasm; Golgi apparatus; nuclear membrane; nucleoplasm; nucleolus; TRAMP complex	0.151554	0.191114	0.000434037	1
ENSG00000164713	6872	6700	4915	5024	5532	5193	5091.21	5545.07	4932.5	5621.52	5987.62	5725.31	7283.57	7932.85	7056.51	8042.23	8565.98	8190.71	200.934	216.786	194.716	222.226	235.271	222.913	7	98252379	98310441	699	BRI3	protein_coding	brain protein I3		protein binding; identical protein binding	nucleus; cytoplasm; membrane; lysosome; lysosomal membrane; perinuclear region of cytoplasm; plasma membrane; azurophil granule membrane	0.123264	0.154598	0.000474262	1
ENSG00000181588	1180	1041	789	848	1011	857	874.219	861.554	791.81	948.855	1094.27	944.847	333.29	328.461	301.872	361.744	417.182	360.216	9.19456	8.97607	8.3298	9.99585	11.4582	9.80338	19	1554672	1568325	2623	MEX3D	protein_coding	mex-3 RNA binding family member D	mRNA localization resulting in post-transcriptional regulation of gene expression; mRNA destabilization	RNA binding; nucleic acid binding; metal ion binding; mRNA 3'-UTR AU-rich region binding	nucleus; cytoplasm; perinuclear region of cytoplasm	0.186429	0.239574	0.000651603	1
ENSG00000115756	3982	3693	2938	2778	3085	3275	2950.12	3056.41	2948.46	3108.4	3339.08	3610.7	1790.12	1854.62	1789.12	1886.16	2026.14	2190.96	49.3846	50.6822	49.3686	52.1191	55.6494	59.6276	2	10302889	10427617	1648	HPCAL1	protein_coding	hippocalcin like 1		calcium ion binding; metal ion binding; protein binding	membrane	0.130277	0.167598	0.000690639	1
ENSG00000110721	784	726	605	609	652	678	580.837	600.853	607.154	681.43	705.7	747.498	761.254	787.488	795.746	893.093	924.901	979.683	21.0009	21.5202	21.9577	24.6783	25.403	26.6624	11	68052859	68121444	763	CHKA	protein_coding	choline kinase alpha	lipid metabolic process; phosphorylation; phosphatidylcholine biosynthetic process; phosphatidylethanolamine biosynthetic process; phospholipid biosynthetic process; CDP-choline pathway; cellular response to glucose starvation; lipid droplet disassembly; lipid transport	nucleotide binding; ATP binding; kinase activity; transferase activity; protein tyrosine kinase activity; protein homodimerization activity; protein binding; choline kinase activity; cholinesterase activity; ethanolamine kinase activity; identical protein binding	cytoplasm; cytosol; lipid droplet	0.199891	0.25612	0.00071039	1
ENSG00000100811	6052	5584	4313	4356	4446	4520	4483.71	4621.44	4328.36	4874.07	4812.18	4983.32	4024.87	4148.51	3885.42	4375.29	4319.73	4473.36	111.035	113.369	107.214	120.9	118.644	121.744	14	100238298	100282788	1114	YY1	protein_coding	YY1 transcription factor	negative regulation of transcription by RNA polymerase II; cell differentiation; DNA repair; cellular response to DNA damage stimulus; regulation of transcription by RNA polymerase II; DNA recombination; spermatogenesis; double-strand break repair via homologous recombination; chromatin remodeling; positive regulation of transcription by RNA polymerase II; regulation of DNA repair; positive regul…	metal ion binding; DNA binding; protein binding; DNA-binding transcription factor activity, RNA polymerase II-specific; RNA polymerase II cis-regulatory region sequence-specific DNA binding; cis-regulatory region sequence-specific DNA binding; sequence-specific double-stranded DNA binding; DNA-binding transcription activator activity, RNA polymerase II-specific; DNA-binding transcription represso…	nucleus; Ino80 complex; nuclear matrix; transcription regulator complex; nucleoplasm; PcG protein complex; chromatin; chromatin silencing complex	0.102445	0.126347	0.00082837	1
ENSG00000143545	2408	2115	1791	1427	1480	1421	1784	1750.42	1797.38	1596.72	1601.89	1566.66	1532.65	1503.8	1544.14	1371.75	1376.2	1345.93	42.2815	41.0952	42.6087	37.9047	37.7982	36.6298	1	153981617	153986358	1164	RAB13	protein_coding	RAB13, member RAS oncogene family	protein transport; protein secretion; endocytic recycling; endosomal transport; protein kinase A signaling; vesicle docking involved in exocytosis; cellular response to insulin stimulus; neuron projection development; protein localization to plasma membrane; cortical actin cytoskeleton organization; bicellular tight junction assembly; regulation of exocytosis; endothelial cell chemotaxis; trans-G…	GTPase activity; GTP binding; nucleotide binding; protein binding	cytosol; plasma membrane; membrane; cell projection; cytoplasmic vesicle membrane; cytoplasmic vesicle; endosome; anchoring junction; recycling endosome membrane; trans-Golgi network; neuron projection; recycling endosome; lateral plasma membrane; lamellipodium; bicellular tight junction; extracellular exosome; synaptic vesicle; cell junction; endocytic vesicle; trans-Golgi network transport vesi…	-7.09e-05	-0.161786	0.000914479	1
ENSG00000262902	42	27	17	18	329	134	31.1163	22.3458	17.0605	20.1408	356.097	147.736	49.786	35.7533	27.2969	32.2253	569.755	236.377	1.37346	0.977051	0.753225	0.89046	15.6487	6.43307	17	53105734	53106358	625	MTCO1P40	processed_pseudogene	MT-CO1 pseudogene 40				2.17872	2.89079	0.000982395	1
ENSG00000176171	5911	4940	3919	3017	3647	3331	4379.24	4088.45	3932.96	3375.82	3947.37	3672.44	3363.47	3140.13	3020.7	2592.8	3031.78	2820.62	92.7891	85.8123	83.3528	71.6451	83.2698	76.7639	10	131967684	131981967	1302	BNIP3	protein_coding	BCL2 interacting protein 3	positive regulation of apoptotic process; cellular response to hypoxia; negative regulation of apoptotic process; apoptotic process; defense response to virus; regulation of metabolic process; reactive oxygen species metabolic process; positive regulation of autophagy; response to hypoxia; cellular response to mechanical stimulus; positive regulation of release of cytochrome c from mitochondria; …	identical protein binding; protein homodimerization activity; protein binding; GTPase binding	membrane; mitochondrial envelope; nucleus; cytoplasm; mitochondrion; mitochondrial outer membrane; nuclear envelope; dendrite; nucleoplasm; mitochondrial membrane; endoplasmic reticulum; postsynaptic density	-0.129373	-0.174105	0.00104173	1
ENSG00000099260	4054	3380	2794	2401	2412	2195	3003.46	2797.36	2803.95	2686.56	2610.66	2420	1312.13	1222.09	1224.97	1173.68	1140.52	1057.23	36.198	33.3968	33.8015	32.4316	31.3252	28.7728	1	99646113	99694541	2289	PALMD	protein_coding	palmdelphin	regulation of cell shape	protein binding	membrane; cytoplasm; cell projection; dendrite; synapse; dendritic spine	-7.05556e-05	-0.157938	0.00107929	1
ENSG00000167863	7255	6895	5218	4273	4421	4665	5374.96	5706.45	5236.58	4781.2	4785.12	5143.18	8825.89	9370.2	8598.65	7850.9	7857.34	8445.29	243.482	256.065	237.27	216.939	215.807	229.841	17	75038863	75046985	609	ATP5PD	protein_coding	ATP synthase peripheral stalk subunit d	proton motive force-driven ATP synthesis; monoatomic ion transport; proton transmembrane transport; proton motive force-driven mitochondrial ATP synthesis	proton transmembrane transporter activity; protein binding; proton-transporting ATP synthase activity, rotational mechanism	mitochondrial proton-transporting ATP synthase complex, coupling factor F(o); membrane; mitochondrion; mitochondrial inner membrane; proton-transporting ATP synthase complex, coupling factor F(o); mitochondrial proton-transporting ATP synthase complex; mitochondrial proton-transporting ATP synthase, stator stalk	-0.110483	-0.150036	0.00121051	1
ENSG00000149782	5512	5256	4270	4072	4246	4261	4083.64	4349.98	4285.21	4556.3	4595.71	4697.77	1003.6	1069.05	1053.13	1119.76	1129.44	1154.53	27.6865	29.2147	29.06	30.9416	31.0209	31.4208	11	64251530	64269150	4069	PLCB3	protein_coding	phospholipase C beta 3	signal transduction; intracellular signal transduction; lipid metabolic process; lipid catabolic process; phosphatidylinositol metabolic process; G protein-coupled receptor signaling pathway; phosphatidylinositol-mediated signaling; release of sequestered calcium ion into cytosol; regulation of systemic arterial blood pressure	calcium ion binding; phosphatidylinositol phospholipase C activity; phosphoric diester hydrolase activity; hydrolase activity; protein binding; cadherin binding; calmodulin binding; molecular adaptor activity; molecular function activator activity; phospholipase C activity	nucleus; cytoplasm; membrane; cytosol; protein-containing complex; postsynaptic cytosol	0.0920312	0.123475	0.00121223	1
ENSG00000163297	11812	10983	9007	8465	8805	9001	8751.08	9089.77	9039.07	9471.77	9530.19	9923.64	5940.99	6170.92	6136.51	6430.26	6469.92	6737.03	163.896	168.637	169.33	177.683	177.701	183.35	4	79901146	80125454	1473	ANTXR2	protein_coding	ANTXR cell adhesion molecule 2		signaling receptor activity; metal ion binding; protein binding; transmembrane signaling receptor activity	membrane; extracellular region; endoplasmic reticulum; endoplasmic reticulum membrane; plasma membrane; endosome membrane; cell surface	0.0764877	0.106072	0.00126366	1
ENSG00000112972	5987	4743	4255	3443	3567	3259	4435.55	3925.41	4270.15	3852.49	3860.78	3593.06	6264.9	5544.36	6031.29	5441.36	5453.08	5074.95	172.832	151.514	166.426	150.358	149.773	138.116	5	43287470	43313512	708	HMGCS1	protein_coding	3-hydroxy-3-methylglutaryl-CoA synthase 1	isoprenoid biosynthetic process; acetyl-CoA metabolic process; farnesyl diphosphate biosynthetic process, mevalonate pathway; lipid metabolic process; steroid biosynthetic process; cholesterol biosynthetic process; steroid metabolic process; cholesterol metabolic process; sterol biosynthetic process	acyltransferase activity; hydroxymethylglutaryl-CoA synthase activity; transferase activity; protein homodimerization activity	cytoplasm; cytosol	-0.116843	-0.159989	0.00139004	1
ENSG00000279901	10	5	3	0	0	0	7.40863	4.13811	3.01068	0	0	0	4.46572	2.49434	1.81476	0	0	0	0.123197	0.0681643	0.0500761	0	0	0	16	2683106	2684764	1659		TEC	tec				-2.5876e-06	-4.60084	0.00144375	1
ENSG00000137871	777	696	593	455	436	432	575.651	576.025	595.112	509.115	471.91	476.282	408.553	408.818	422.365	361.33	334.925	338.028	11.2709	11.172	11.6547	9.98441	9.19895	9.19954	15	56630176	56734086	1409	ZNF280D	protein_coding	zinc finger protein 280D	regulation of transcription by RNA polymerase II; regulation of DNA-templated transcription	metal ion binding; DNA binding; RNA polymerase II cis-regulatory region sequence-specific DNA binding; DNA-binding transcription factor activity, RNA polymerase II-specific; protein binding	nucleus	-0.189349	-0.260778	0.00151457	1
ENSG00000100281	1916	1708	1463	1168	1181	1118	1419.49	1413.58	1468.21	1306.91	1278.27	1232.6	1336.62	1331.05	1382.49	1230.62	1203.64	1160.64	36.8738	36.3745	38.1483	34.0048	33.0589	31.5872	22	35257452	35295807	1062	HMGXB4	protein_coding	HMG-box containing 4	Wnt signaling pathway; negative regulation of Wnt signaling pathway; endosome to lysosome transport	DNA binding; protein binding; identical protein binding	nucleus; NURF complex	-6.08174e-05	-0.17125	0.00157565	1
ENSG00000178951	3812	3534	3137	2866	3000	3024	2824.17	2924.81	3148.17	3206.86	3247.08	3333.97	662.951	686.576	739.007	752.785	762.226	782.623	18.289	18.7625	20.392	20.8012	20.9351	21.2993	19	4043303	4066899	4260	ZBTB7A	protein_coding	zinc finger and BTB domain containing 7A	negative regulation of transcription by RNA polymerase II; chromatin organization; cell differentiation; chromatin remodeling; regulation of transcription by RNA polymerase II; regulation of apoptotic process; regulation of alternative mRNA splicing, via spliceosome; fat cell differentiation; negative regulation of DNA-templated transcription; erythrocyte maturation; regulation of DNA-binding tra…	protein binding; metal ion binding; DNA binding; DNA-binding transcription factor activity; RNA polymerase II cis-regulatory region sequence-specific DNA binding; DNA-binding transcription factor activity, RNA polymerase II-specific; sequence-specific double-stranded DNA binding; transcription corepressor binding; DNA-binding transcription factor binding; nuclear androgen receptor binding; SMAD b…	nucleus; cytoplasm; site of double-strand break; DNA-dependent protein kinase complex	0.100473	0.139412	0.00162478	1
ENSG00000078269	1843	1673	1376	1355	1420	1408	1365.41	1384.61	1380.9	1516.15	1536.95	1552.33	450.78	457.118	455.893	500.546	507.413	512.488	12.4358	12.492	12.5798	13.8313	13.9364	13.9475	6	157981863	158099176	3029	SYNJ2	protein_coding	synaptojanin 2	phosphatidylinositol dephosphorylation; lipid metabolic process; phosphatidylinositol biosynthetic process; phosphatidylinositol-3-phosphate biosynthetic process; membrane organization; synaptic vesicle endocytosis; phosphatidylinositol metabolic process	RNA binding; catalytic activity; phosphatase activity; nucleic acid binding; phosphatidylinositol phosphate phosphatase activity; hydrolase activity; protein binding; phosphatidylinositol-4,5-bisphosphate 5-phosphatase activity; phosphatidylinositol-3-phosphate phosphatase activity; SH3 domain binding; phosphatidylinositol phosphate 4-phosphatase activity; phosphatidylinositol-3,5-bisphosphate 5-…	cytoplasm; membrane; cell projection; plasma membrane; cytoskeleton; synapse; membrane raft; presynapse; cytosol; perinuclear region of cytoplasm	6.53001e-05	0.15716	0.00169559	1
ENSG00000114127	3563	3177	2947	2004	2322	2299	2639.7	2629.35	2957.49	2242.34	2513.24	2534.66	3881.91	3866.7	4349.26	3297.56	3695.95	3727.44	107.091	105.668	120.013	91.1194	101.512	101.443	3	142306607	142448062	680	XRN1	protein_coding	5'-3' exoribonuclease 1	nuclear-transcribed mRNA catabolic process; histone mRNA catabolic process; nuclear mRNA surveillance; negative regulation of telomere maintenance via telomerase; rRNA catabolic process; negative regulation of translation; response to testosterone; cellular response to cycloheximide; cellular response to puromycin	nucleic acid binding; exonuclease activity; 5'-3' exonuclease activity; RNA binding; hydrolase activity; DNA binding; protein binding; nuclease activity; telomerase RNA binding; G-quadruplex DNA binding; 5'-3' exoribonuclease activity; G-quadruplex RNA binding	cytoplasm; membrane; cytosol; plasma membrane; nucleus; P-body; dendrite; neuronal cell body	-0.119058	-0.17276	0.00177517	1
ENSG00000126461	5528	4824	4044	3874	4225	3899	4095.49	3992.45	4058.4	4334.75	4572.98	4298.67	7104.06	6925.32	7039.72	7519.07	7932.31	7456.49	195.982	189.252	194.253	207.77	217.866	202.93	19	49642209	49658642	576.5	SCAF1	protein_coding	SR-related CTD associated factor 1	mRNA processing; RNA splicing; transcription by RNA polymerase II	RNA binding; protein binding; RNA polymerase II C-terminal domain binding; protein domain specific binding	nucleus	0.0854846	0.120747	0.00186567	1
ENSG00000052723	2134	1790	1481	1194	1235	1251	1581	1481.44	1486.27	1336.01	1336.72	1379.23	3422.08	3206.59	3217.04	2891.79	2893.33	2985.35	94.406	87.6284	88.7705	79.9069	79.4671	81.2473	1	114769479	114780685	462	SIKE1	protein_coding	suppressor of IKBKE 1		protein binding; small GTPase binding; protein kinase binding	cytoplasm; cytosol	-5.97557e-05	-0.167999	0.00191939	1
ENSG00000197451	9654	8542	6576	6531	7087	6838	7152.3	7069.54	6599.42	7307.75	7670.69	7538.93	4366.48	4315.96	4028.95	4461.39	4682.96	4602.52	120.459	117.945	111.174	123.279	128.621	125.259	5	178204533	178211163	1638	HNRNPAB	protein_coding	heterogeneous nuclear ribonucleoprotein A/B	positive regulation of macromolecule biosynthetic process; regulation of gene expression; positive regulation of DNA-templated transcription; mRNA modification; positive regulation of DNA demethylation; negative regulation of nuclear-transcribed mRNA catabolic process, nonsense-mediated decay; epithelial to mesenchymal transition	RNA binding; nucleic acid binding; protein binding; mRNA binding	nucleus; cytoplasm; cellular anatomical entity; nucleoplasm; ribonucleoprotein complex; RNA polymerase II transcription regulator complex; mRNA editing complex	0.0779523	0.112212	0.00197446	1
ENSG00000184185	45	62	48	60	67	63	33.3389	51.3125	48.1709	67.136	72.5182	69.4578	8.93683	13.7549	12.9127	17.9965	19.4393	18.6189	0.246543	0.375888	0.356312	0.497286	0.533913	0.506719	17	21376357	21419870	3730.5	KCNJ12	protein_coding	potassium inwardly rectifying channel subfamily J member 12	potassium ion transport; monoatomic ion transport; monoatomic ion transmembrane transport; potassium ion import across plasma membrane; regulation of monoatomic ion transmembrane transport; muscle contraction; protein homotetramerization; regulation of heart contraction	inward rectifier potassium channel activity; protein binding	membrane; plasma membrane; ion channel complex	0.46862	0.666819	0.00199247	1
ENSG00000114023	1880	1774	1395	1163	1157	1098	1392.82	1468.2	1399.97	1301.32	1252.29	1210.55	460.057	484.955	462.417	429.833	413.639	399.851	12.6917	13.2527	12.7599	11.8773	11.3609	10.8821	3	122384161	122412334	3027.5	FAM162A	protein_coding	family with sequence similarity 162 member A	apoptotic process; positive regulation of apoptotic process; positive regulation of release of cytochrome c from mitochondria; activation of cysteine-type endopeptidase activity involved in apoptotic process; cellular response to hypoxia; neuron apoptotic process	protein binding	membrane; cytosol; mitochondrion; mitochondrial membrane	-5.37508e-05	-0.179052	0.00237469	1
ENSG00000233695	894	724	692	505	518	423	662.332	599.198	694.464	565.061	560.663	466.359	147.414	133.363	154.566	125.765	124.786	103.797	4.06676	3.64448	4.26506	3.47518	3.42733	2.82486	13	113815630	113845744	4493	GAS6-AS1	lncRNA	GAS6 antisense RNA 1				-0.200837	-0.295871	0.00245668	1
ENSG00000011304	18227	16884	13195	12885	13460	13187	13503.7	13973.6	13242	14417.5	14568.6	14538.7	9767.61	10107.5	9578.29	10428.5	10537.9	10516.3	269.462	276.213	264.302	288.165	289.429	286.203	19	797075	812327	1382.5	PTBP1	protein_coding	polypyrimidine tract binding protein 1	mRNA processing; RNA splicing; regulation of RNA splicing; regulation of alternative mRNA splicing, via spliceosome; IRES-dependent viral translational initiation; negative regulation of mRNA splicing, via spliceosome; negative regulation of RNA splicing; regulation of cell differentiation; negative regulation of muscle cell differentiation; positive regulation of protein dephosphorylation; posit…	RNA binding; nucleic acid binding; protein binding; mRNA binding; DNA binding; pre-mRNA binding; poly-pyrimidine tract binding	nucleus; membrane; nucleoplasm; extracellular exosome; nucleolus	0.0676525	0.0959467	0.00250639	1
ENSG00000176619	13839	11918	9470	9543	10154	9469	10252.8	9863.6	9503.72	10678	10990.3	10439.6	12760.2	12275.8	11827.9	13289.3	13678	12992.7	352.019	335.468	326.377	367.216	375.676	353.599	19	2427638	2456959	803.5	LMNB2	protein_coding	lamin B2	cytoskeleton organization; nuclear envelope organization; nuclear migration; heterochromatin formation; nuclear pore localization; protein localization to nuclear envelope	protein binding; identical protein binding; structural constituent of cytoskeleton	nucleus; nuclear membrane; nuclear envelope; intermediate filament; nuclear lamina	0.0780863	0.115922	0.00267072	1
ENSG00000078487	336	279	273	167	173	184	248.93	230.906	273.972	186.862	187.249	202.861	141.921	131.646	156.198	106.535	106.755	115.656	3.91523	3.59756	4.31012	2.9438	2.9321	3.14762	7	100400826	100428992	1754	ZCWPW1	protein_coding	zinc finger CW-type and PWWP domain containing 1	cell differentiation; spermatogenesis; positive regulation of double-strand break repair; homologous chromosome pairing at meiosis; meiosis I; positive regulation of DNA recombination; chromatin organization	zinc ion binding; metal ion binding; methylated histone binding; methyl-CpG binding; protein binding; histone reader activity	nucleus; chromosome; XY body	-0.25051	-0.382856	0.00294263	1
ENSG00000134531	6458	5667	4394	4216	4725	4846	4784.5	4690.13	4409.65	4717.42	5114.16	5342.74	8206.68	8044.82	7563.72	8091.63	8772.14	9164.22	226.4	219.846	208.712	223.591	240.933	249.407	12	13196723	13219941	583	EMP1	protein_coding	epithelial membrane protein 1	apoptotic process; epidermis development; bleb assembly	protein binding	membrane; plasma membrane	7.20372e-05	0.127392	0.00300978	1
ENSG00000106236	166660	154331	121837	117758	120228	120839	123472	127728	122271	131763	130130	133226	69444.5	71837.8	68768.8	74107.6	73189.1	74930	1915.78	1963.16	1897.59	2047.77	2010.19	2039.24	7	98617285	98629869	1778	NPTX2	protein_coding	neuronal pentraxin 2	chemical synaptic transmission; associative learning	metal ion binding; carbohydrate binding; protein binding	extracellular region; glutamatergic synapse	0.0754829	0.0812728	0.00304207	1
ENSG00000141985	13443	12361	9735	9491	9852	9732	9959.43	10230.2	9769.67	10619.8	10663.4	10729.6	8163.47	8385.44	8007.92	8704.75	8740.51	8794.73	225.208	229.154	220.969	240.533	240.064	239.351	19	4360370	4400547	1220	SH3GL1	protein_coding	SH3 domain containing GRB2 like 1, endophilin A2	endocytosis; signal transduction; central nervous system development; synaptic vesicle uncoating	protein binding; lipid binding; identical protein binding; cadherin binding	cytoplasm; membrane; cell projection; cytosol; endosome; presynapse; anchoring junction; podosome; early endosome membrane; glutamatergic synapse	0.06239	0.0954182	0.0030649	1
ENSG00000132361	3728	3339	2709	2684	2757	2725	2761.94	2763.43	2718.65	3003.22	2984.07	3004.33	4721.26	4723.81	4647.26	5133.7	5100.97	5135.6	130.247	129.09	128.236	141.856	140.102	139.767	17	2689386	2712663	585	CLUH	protein_coding	clustered mitochondria homolog	organelle organization; mitochondrion organization; intracellular distribution of mitochondria	protein binding; RNA binding; mRNA binding	cytoplasm	0.083645	0.124902	0.00314436	1
ENSG00000159840	12262	10667	8999	8710	9301	8290	9084.47	8828.24	9031.04	9745.91	10067	9139.76	11153.4	10838.8	11087.8	11965.5	12359.8	11221.3	307.693	296.2	305.956	330.635	339.47	305.391	7	143381295	143391111	814.5	ZYX	protein_coding	zyxin	cell adhesion; integrin-mediated signaling pathway; transforming growth factor beta receptor signaling pathway; stress fiber assembly; cell-cell signaling; cell-matrix adhesion; cellular response to type II interferon	RNA binding; metal ion binding; protein binding	nucleus; cytoplasm; cytosol; plasma membrane; cytoskeleton; focal adhesion; anchoring junction; actin cytoskeleton; stress fiber; adherens junction; phagocytic vesicle	0.076682	0.103784	0.00316055	1
ENSG00000168758	3541	2996	2409	2392	2763	2413	2623.4	2479.55	2417.58	2676.49	2990.56	2660.34	875.049	827.07	806.397	892.758	997.52	887.373	24.1402	22.6018	22.2516	24.669	27.3976	24.1501	2	96859718	96870757	2998	SEMA4C	protein_coding	semaphorin 4C	cell differentiation; nervous system development; neural tube closure; positive regulation of stress-activated MAPK cascade; neural crest cell migration; axon guidance; semaphorin-plexin signaling pathway; positive regulation of cell migration; negative regulation of axon extension involved in axon guidance; negative chemotaxis; muscle cell differentiation; cell migration in hindbrain; cerebellum…	protein binding; semaphorin receptor binding; chemorepellent activity	membrane; cytoplasmic vesicle; plasma membrane; synapse; extracellular space; postsynaptic membrane; synaptic vesicle membrane; postsynaptic density; postsynaptic density membrane	0.0914586	0.146117	0.00332346	1
ENSG00000142409	1550	1405	1086	1126	1179	1168	1148.34	1162.81	1089.87	1259.92	1276.1	1287.73	693.023	701.755	657.735	760.361	770.129	777.143	19.1186	19.1773	18.1494	21.0106	21.1521	21.1502	19	56087366	56121295	1657	ZNF787	protein_coding	zinc finger protein 787	regulation of transcription by RNA polymerase II	metal ion binding; DNA binding; DNA-binding transcription factor activity, RNA polymerase II-specific; sequence-specific double-stranded DNA binding; sequence-specific DNA binding	nucleus	0.105945	0.167647	0.00342041	1
ENSG00000101412	3321	3057	2392	2401	2497	2435	2460.41	2530.04	2400.52	2686.56	2702.66	2684.6	914.65	940.535	892.386	998.721	1004.7	997.992	25.2327	25.7026	24.6243	27.597	27.5949	27.1606	20	33675477	33686385	2690	E2F1	protein_coding	E2F transcription factor 1	regulation of DNA-templated transcription; regulation of transcription by RNA polymerase II; positive regulation of gene expression; apoptotic process; DNA-templated transcription; cell cycle; positive regulation of DNA-templated transcription; positive regulation of transcription by RNA polymerase II; DNA damage checkpoint signaling; positive regulation of apoptotic process; negative regulation …	RNA polymerase II cis-regulatory region sequence-specific DNA binding; protein dimerization activity; protein binding; DNA binding; DNA-binding transcription factor activity; sequence-specific DNA binding; DNA-binding transcription factor activity, RNA polymerase II-specific; cis-regulatory region sequence-specific DNA binding; sequence-specific double-stranded DNA binding; molecular adaptor acti…	transcription regulator complex; nucleus; protein-containing complex; nucleoplasm; centrosome; chromatin; RNA polymerase II transcription regulator complex; Rb-E2F complex; cytoplasm	0.0795605	0.126879	0.0034296	1
ENSG00000180815	1	2	2	7	13	7	0.740863	1.65524	2.00712	7.83253	14.0707	7.71753	0.17114	0.382362	0.463646	1.80932	3.25033	1.78275	0.00472128	0.010449	0.0127938	0.0499957	0.0892726	0.0485181	X	19360056	19515508	4329	MAP3K15	protein_coding	mitogen-activated protein kinase kinase kinase 15	protein phosphorylation; MAPK cascade; phosphorylation	ATP binding; protein kinase activity; metal ion binding; nucleotide binding; protein serine/threonine kinase activity; kinase activity; transferase activity; protein serine kinase activity; MAP kinase kinase kinase activity		1.85765	2.79184	0.0034335	1
ENSG00000136295	15105	14442	11981	11394	11555	11384	11190.7	11952.5	12023.7	12749.1	12506.7	12550.9	2625.09	2803.78	2820.47	2990.65	2933.78	2944.15	72.419	76.6206	77.8276	82.6386	80.5781	80.1259	7	2631961	2664802	4263	TTYH3	protein_coding	tweety family member 3	monoatomic ion transport; chloride transmembrane transport; monoatomic ion transmembrane transport; chloride transport	protein binding; chloride channel activity; intracellular calcium activated chloride channel activity; volume-sensitive chloride channel activity	membrane; plasma membrane; chloride channel complex; extracellular exosome	0.0677669	0.104787	0.00347344	1
ENSG00000179051	4602	4041	3213	3149	3544	3216	3409.45	3344.42	3224.44	3523.52	3835.89	3545.66	1679.53	1647.5	1588.39	1735.72	1889.6	1746.63	46.3338	45.0222	43.8299	47.9622	51.8992	47.535	1	17406760	17439677	2030	RCC2	protein_coding	regulator of chromosome condensation 2	cell division; cell cycle; integrin-mediated signaling pathway; regulation of fibroblast migration; regulation of cell migration; establishment of protein localization; negative regulation of focal adhesion assembly; negative regulation of substrate adhesion-dependent cell spreading; regulation of ruffle assembly; focal adhesion assembly; positive regulation of G2/M transition of mitotic cell cyc…	RNA binding; guanyl-nucleotide exchange factor activity; small GTPase binding; microtubule binding; protein binding; protein domain specific binding; protein kinase binding	nucleus; cytoplasm; membrane; plasma membrane; cytoskeleton; chromosome; nucleolus; microtubule; chromosome, centromeric region; midbody; spindle; early endosome membrane; cytosol; mitotic spindle midzone; chromosome, centromeric core domain	0.0808097	0.127485	0.0035463	1
ENSG00000068028	1098	974	785	807	843	886	813.468	806.104	787.795	902.979	912.431	976.819	464.573	460.368	449.912	515.693	521.091	557.864	12.8163	12.5807	12.4148	14.2498	14.3121	15.1824	3	50329782	50340980	1751	RASSF1	protein_coding	Ras association domain family member 1	signal transduction; cell cycle; Ras protein signal transduction; cellular response to DNA damage stimulus; regulation of cell cycle; positive regulation of protein ubiquitination; protein stabilization; regulation of cell cycle G1/S phase transition	metal ion binding; zinc ion binding; protein binding; identical protein binding	nucleus; cytoplasm; cytoskeleton; microtubule; spindle; spindle pole; centrosome; microtubule cytoskeleton	0.132282	0.21329	0.00358585	1
ENSG00000099139	584	556	408	447	533	440	432.664	460.158	409.453	500.163	576.899	485.102	91.453	97.2644	86.5468	105.72	121.94	102.537	2.52294	2.658	2.38816	2.9213	3.34917	2.79057	9	75890644	76362975	4731	PCSK5	protein_coding	proprotein convertase subtilisin/kexin type 5	proteolysis; cell-cell signaling; female pregnancy; heart development; protein processing; kidney development; anterior/posterior pattern specification; embryo implantation; embryonic skeletal system development; signal peptide processing; peptide hormone processing; viral life cycle; plasma lipoprotein particle remodeling; peptide biosynthetic process; embryonic digestive tract development; cyto…	serine-type peptidase activity; serine-type endopeptidase activity; peptidase activity; hydrolase activity; protein binding; endopeptidase activity; peptide binding	extracellular space; extracellular region; membrane; Golgi apparatus; endomembrane system; trans-Golgi network; Golgi lumen	0.151691	0.261179	0.00362226	1
ENSG00000100242	7874	7256	6032	5701	5868	5741	5833.56	6005.22	6053.48	6379.04	6351.3	6329.48	6382.45	6570.27	6623.06	6979.25	6948.9	6925.03	176.074	179.55	182.756	192.853	190.856	188.467	22	38733290	38794143	914	SUN2	protein_coding	Sad1 and UNC84 domain containing 2	meiotic cell cycle; positive regulation of cell migration; mitotic spindle organization; nuclear migration; nuclear matrix anchoring at nuclear membrane; centrosome localization; nuclear migration along microfilament; nucleokinesis involved in cell motility in cerebral cortex radial glia guided migration	protein binding; microtubule binding; identical protein binding; protein-membrane adaptor activity; lamin binding; cytoskeleton-nuclear membrane anchor activity	membrane; nuclear membrane; nucleus; endosome; nuclear envelope; endosome membrane; nuclear inner membrane; meiotic nuclear membrane microtubule tethering complex; chromosome, telomeric region; condensed nuclear chromosome	0.0602732	0.0917102	0.00366979	1
ENSG00000070423	1696	1579	1239	1229	1333	1294	1256.5	1306.81	1243.41	1375.17	1442.79	1426.64	875.003	910.038	865.886	957.638	1004.73	993.483	24.139	24.8692	23.8931	26.4618	27.5955	27.0379	19	647526	663233	1436	RNF126	protein_coding	ring finger protein 126	protein ubiquitination; ubiquitin-dependent protein catabolic process; protein K63-linked ubiquitination; protein K48-linked ubiquitination; ubiquitin-dependent protein catabolic process via the multivesicular body sorting pathway; proteasome-mediated ubiquitin-dependent protein catabolic process; retrograde transport, endosome to Golgi; regulation of cell population proliferation; protein monoub…	ubiquitin protein ligase activity; metal ion binding; transferase activity; protein binding; epidermal growth factor receptor binding	nucleus; cytoplasm; nucleoplasm; cytosol	0.0883706	0.156754	0.00379806	1
ENSG00000166004	2011	1806	1576	1180	1293	1221	1489.88	1494.68	1581.61	1320.34	1399.49	1346.16	858.718	861.49	911.592	761.003	806.624	775.884	23.6897	23.5425	25.1543	21.0283	22.1545	21.1159	11	93661682	93730358	1735	CEP295	protein_coding	centrosomal protein 295	positive regulation of protein acetylation; centriole replication; positive regulation of centriole elongation; positive regulation of establishment of protein localization; regulation of centriole replication; positive regulation of centrosome duplication	microtubule binding	cytoplasm; cytosol; plasma membrane; centriole; cytoskeleton; spindle; centrosome; mitotic spindle microtubule	-5.21222e-05	-0.166031	0.00394792	1
ENSG00000162545	1696	1474	1161	1194	1274	1223	1256.5	1219.91	1165.13	1336.01	1378.93	1348.36	800.831	777.511	742.597	851.502	878.858	859.377	22.0928	21.2475	20.4911	23.529	24.1384	23.3882	1	20482391	20486210	1569	CAMK2N1	protein_coding	calcium/calmodulin dependent protein kinase II inhibitor 1	positive regulation of inflammatory response; long-term memory	protein kinase inhibitor activity; protein kinase binding; calcium-dependent protein kinase inhibitor activity	cell projection; dendrite; synapse; postsynaptic density	5.67423e-05	0.156287	0.00395173	1
ENSG00000165661	2327	2214	1792	1735	1843	1762	1723.99	1832.35	1798.38	1941.35	1994.79	1942.61	526.57	559.668	549.292	592.959	609.283	593.346	14.5266	15.2944	15.1571	16.3849	16.7344	16.1481	9	136206333	136245812	3274	QSOX2	protein_coding	quiescin sulfhydryl oxidase 2	protein folding	thiol oxidase activity; flavin-linked sulfhydryl oxidase activity; oxidoreductase activity; protein disulfide isomerase activity	nucleus; extracellular region; membrane; Golgi apparatus; nucleoplasm; plasma membrane; nuclear membrane; extracellular space	0.0816571	0.135537	0.00396222	1
ENSG00000176946	2372	2063	1713	1664	1755	1758	1757.33	1707.38	1719.1	1861.9	1899.54	1938.2	2238.63	2175.01	2189.94	2371.85	2419.8	2469.05	61.7578	59.4379	60.4287	65.5399	66.4615	67.1959	2	241584405	241637158	785	THAP4	protein_coding	THAP domain containing 4	nitrate metabolic process; tyrosine metabolic process	metal ion binding; isomerase activity; identical protein binding; DNA binding; protein binding; heme binding; peroxynitrite isomerase activity; nitric oxide binding	nucleus; cytoplasm; nucleoplasm; cytosol	0.0796229	0.136484	0.00401224	1
ENSG00000118046	3375	3024	2510	2452	2498	2487	2500.41	2502.73	2518.94	2743.62	2703.74	2741.93	1206.76	1207.88	1215.7	1324.14	1304.89	1323.32	33.2913	33.0085	33.5459	36.5892	35.8398	36.0147	19	1177558	1228431	2072	STK11	protein_coding	serine/threonine kinase 11	protein phosphorylation; regulation of cell growth; establishment of cell polarity; glucose homeostasis; phosphorylation; apoptotic process; cell differentiation; cellular response to DNA damage stimulus; autophagy; cell cycle; spermatogenesis; response to ionizing radiation; tissue homeostasis; vasculature development; axonogenesis; negative regulation of cell population proliferation; response …	ATP binding; protein kinase activity; protein serine/threonine kinase activity; protein kinase activator activity; protein binding; metal ion binding; nucleotide binding; kinase activity; transferase activity; protein serine kinase activity; magnesium ion binding; LRR domain binding; protein-containing complex binding; p53 binding	nucleus; cytoplasm; membrane; nucleoplasm; cytosol; mitochondrion; Z disc; protein-containing complex; extracellular exosome; serine/threonine protein kinase complex; intracellular protein-containing complex	0.0687285	0.122725	0.00410921	1
ENSG00000169221	3336	2931	2342	2336	2495	2372	2471.52	2425.76	2350.34	2613.83	2700.49	2615.14	2397.21	2352.82	2279.67	2535.24	2619.29	2536.51	66.1324	64.297	62.9048	70.0545	71.9407	69.0318	16	30357102	30370494	1031	TBC1D10B	protein_coding	TBC1 domain family member 10B	retrograde transport, endosome to Golgi; regulation of GTPase activity	GTPase activator activity; protein binding	cytoplasm; plasma membrane; cytosol	0.0724951	0.128856	0.00412894	1
ENSG00000136149	15	27	12	26	42	23	11.113	22.3458	12.0427	29.0923	45.4592	25.3576	18.1584	36.5127	19.6777	47.5364	74.2797	41.434	0.500941	0.997806	0.542982	1.31354	2.04014	1.12764	13	54440704	54441315	612	RPL13AP25	processed_pseudogene	ribosomal protein L13a pseudogene 25				0.668272	1.13375	0.00414346	1
ENSG00000159363	9073	8164	6326	6074	6819	6628	6721.85	6756.7	6348.53	6796.4	7380.62	7307.4	7744.07	7784.22	7313.97	7829.95	8503.02	8418.66	213.638	212.724	201.82	216.36	233.541	229.116	1	16985958	17011928	868	ATP13A2	protein_coding	ATPase cation transporting 13A2	monoatomic cation transmembrane transport; autophagy; monoatomic ion transmembrane transport; positive regulation of gene expression; transmembrane transport; cellular calcium ion homeostasis; regulation of autophagy of mitochondrion; regulation of mitochondrion organization; lipid homeostasis; positive regulation of protein secretion; lysosomal transport; regulation of macroautophagy; cellular r…	ATP binding; nucleotide binding; ATP hydrolysis activity; transporter activity; P-type transmembrane transporter activity; ATPase-coupled monoatomic cation transmembrane transporter activity; P-type ion transporter activity; metal ion binding; protein binding; lipid binding; phosphatidylinositol-3,5-bisphosphate binding; zinc ion binding; cupric ion binding; polyamine transmembrane transporter ac…	membrane; cytoplasmic vesicle; endosome; lysosome; lysosomal membrane; late endosome membrane; multivesicular body membrane; autophagosome membrane; autophagosome; lysosomal lumen; neuron projection; vesicle; neuronal cell body; transport vesicle; late endosome; multivesicular body; vesicle membrane	0.0755153	0.115378	0.00421517	1
ENSG00000198739	33	25	23	9	6	7	24.4485	20.6905	23.0819	10.0704	6.49417	7.71753	54.451	46.0814	51.4074	22.4285	14.4636	17.1883	1.50215	1.25929	1.41853	0.619752	0.397253	0.467784	10	66926036	67101551	449	LRRTM3	protein_coding	leucine rich repeat transmembrane neuronal 3	regulation of presynapse assembly; positive regulation of amyloid-beta formation; positive regulation of synapse assembly	protein binding	membrane; plasma membrane; synapse; postsynaptic membrane; extracellular space; extracellular matrix; glutamatergic synapse; postsynaptic density membrane	-5.86146e-06	-1.49286	0.00425958	1
ENSG00000176692	1127	1138	1006	935	943	1023	834.953	941.833	1009.58	1046.2	1020.67	1127.86	287.915	324.77	348.132	360.759	351.954	388.918	7.94279	8.87519	9.60629	9.96863	9.66666	10.5845	16	86566829	86569728	2900	FOXC2	protein_coding	forkhead box C2	regulation of DNA-templated transcription; positive regulation of DNA-templated transcription; regulation of transcription by RNA polymerase II; anatomical structure morphogenesis; cell differentiation; positive regulation of transcription by RNA polymerase II; negative regulation of cold-induced thermogenesis; negative regulation of transcription by RNA polymerase II; positive regulation of endo…	DNA-binding transcription factor activity; sequence-specific DNA binding; DNA binding; chromatin DNA binding; protein binding; identical protein binding; RNA polymerase II cis-regulatory region sequence-specific DNA binding; DNA-binding transcription factor activity, RNA polymerase II-specific; sequence-specific double-stranded DNA binding; DNA-binding transcription activator activity, RNA polyme…	nucleus; nucleoplasm; nuclear body; chromatin	4.22407e-05	0.200783	0.00428773	1
ENSG00000130522	3419	2978	2511	2457	2468	2485	2533.01	2464.66	2519.94	2749.22	2671.27	2739.72	2085.64	2029.36	2074.88	2263.66	2199.48	2255.85	57.5372	55.4576	57.2539	62.5503	60.4102	61.3935	19	18279694	18281622	1214.5	JUND	protein_coding	JunD proto-oncogene, AP-1 transcription factor subunit	regulation of DNA-templated transcription; regulation of transcription by RNA polymerase II; regulation of cell population proliferation; negative regulation of transcription by RNA polymerase II; regulation of cell cycle; positive regulation of transcription by RNA polymerase II; osteoblast development; gene expression; positive regulation of osteoblast differentiation; cellular response to calc…	DNA binding; DNA-binding transcription factor activity; protein binding; enzyme binding; RNA polymerase II cis-regulatory region sequence-specific DNA binding; DNA-binding transcription factor activity, RNA polymerase II-specific; transcription cis-regulatory region binding; sequence-specific double-stranded DNA binding; double-stranded DNA binding; transcription coregulator binding; DNA-binding …	nucleus; nucleoplasm; chromatin; transcription regulator complex; transcription repressor complex; RNA polymerase II transcription regulator complex; transcription factor AP-1 complex	0.0675781	0.118252	0.00438165	1
ENSG00000202150	5	4	8	0	0	0	3.70432	3.31049	8.02849	0	0	0	35.6184	31.8316	77.197	0	0	0	0.982616	0.869882	2.13016	0	0	0	20	35030317	35030420	104	RNU6-407P	snRNA	RNA, U6 small nuclear 407, pseudogene				-1.73926e-06	-4.61726	0.00445238	1
ENSG00000160216	2481	1974	1673	1683	1908	1656	1838.08	1633.73	1678.96	1883.16	2065.15	1825.75	1907.71	1695.62	1742.56	1954.5	2143.38	1894.91	52.6286	46.3371	48.0839	54.0075	58.8694	51.5706	21	43865223	43987592	963.5	AGPAT3	protein_coding	1-acylglycerol-3-phosphate O-acyltransferase 3	lipid metabolic process; phospholipid biosynthetic process; CDP-diacylglycerol biosynthetic process; phosphatidic acid biosynthetic process	acyltransferase activity; transferase activity; protein binding; 1-acylglycerol-3-phosphate O-acyltransferase activity; lysophosphatidic acid acyltransferase activity	nucleus; membrane; endoplasmic reticulum; endoplasmic reticulum membrane; plasma membrane; nuclear envelope; endomembrane system; Golgi membrane	0.0942089	0.163785	0.00446941	1
ENSG00000104774	2890	2760	2319	2210	2296	2196	2141.1	2284.24	2327.26	2472.84	2485.1	2421.1	3730.13	3979.5	4054.46	4308.09	4329.45	4217.94	102.904	108.75	111.878	119.043	118.911	114.793	19	12646511	12666742	574	MAN2B1	protein_coding	mannosidase alpha class 2B member 1	carbohydrate metabolic process; mannose metabolic process; metabolic process; protein modification process; protein deglycosylation; learning or memory; oligosaccharide catabolic process	catalytic activity; alpha-mannosidase activity; carbohydrate binding; metal ion binding; hydrolase activity; hydrolase activity, acting on glycosyl bonds	intracellular membrane-bounded organelle; nucleoplasm; lysosome; extracellular space; extracellular region; extracellular exosome; lysosomal lumen; azurophil granule lumen	0.0752865	0.12949	0.00457738	1
ENSG00000130309	9262	8322	6368	6255	6943	6524	6861.88	6887.47	6390.68	6998.93	7514.83	7192.74	2745.3	2755.54	2556.78	2800.13	3006.54	2877.67	75.7354	75.3023	70.5514	77.3742	82.5765	78.3167	19	17555649	17583162	2499.5	COLGALT1	protein_coding	collagen beta(1-O)galactosyltransferase 1	collagen fibril organization; positive regulation of collagen fibril organization	transferase activity; glycosyltransferase activity; procollagen galactosyltransferase activity	membrane; endoplasmic reticulum; endoplasmic reticulum lumen	0.0672662	0.107426	0.00458331	1
ENSG00000205420	1	0	0	1	2	19	0.740863	0	0	1.11893	2.16472	20.9476	1.03617	0	0	1.56494	3.02758	29.2973	0.0285852	0	0	0.043243	0.0831547	0.797335	12	52487176	52493257	715	KRT6A	protein_coding	keratin 6A	cell differentiation; positive regulation of cell population proliferation; defense response to Gram-positive bacterium; intermediate filament organization; killing of cells of another organism; antimicrobial humoral immune response mediated by antimicrobial peptide; wound healing; keratinization; morphogenesis of an epithelium; negative regulation of entry of bacterium into host cell	protein binding; structural constituent of cytoskeleton; structural constituent of skin epidermis	keratin filament; nucleus; membrane; intermediate filament; cytosol; extracellular exosome	2.93443	4.7282	0.00462318	1
ENSG00000074416	9089	7934	6622	6162	6655	6586	6733.71	6566.35	6645.58	6894.87	7203.11	7261.1	6358.55	6200.52	6275.34	6510.73	6801.81	6856.56	175.415	169.445	173.161	179.907	186.816	186.603	3	127689062	128052190	1059	MGLL	protein_coding	monoglyceride lipase	lipid metabolic process; fatty acid metabolic process; lipid catabolic process; fatty acid biosynthetic process; regulation of signal transduction; triglyceride catabolic process; inflammatory response; arachidonic acid metabolic process; monoacylglycerol catabolic process; regulation of sensory perception of pain; regulation of inflammatory response; acylglycerol catabolic process; regulation of…	hydrolase activity; protein homodimerization activity; protein binding; carboxylic ester hydrolase activity; acylglycerol lipase activity; lysophospholipase activity	cytoplasm; membrane; cytosol; plasma membrane; endoplasmic reticulum membrane	0.055851	0.0987314	0.00469271	1
ENSG00000108840	64264	58097	48033	44778	47610	45682	47610.9	48082.3	48204	50103.6	51531.2	50364.6	51920.2	52434.4	52567.1	54638.6	56195.4	54923.2	1432.34	1432.91	1450.53	1509.79	1543.45	1494.75	17	44076746	44123702	917	HDAC5	protein_coding	histone deacetylase 5	histone deacetylation; negative regulation of transcription by RNA polymerase II; chromatin organization; response to stimulus; inflammatory response; B cell activation; negative regulation of DNA-templated transcription; positive regulation of transcription by RNA polymerase II; positive regulation of DNA-binding transcription factor activity; negative regulation of gene expression, epigenetic; …	histone deacetylase activity; protein binding; metal ion binding; hydrolase activity; enzyme binding; protein lysine deacetylase activity; identical protein binding; RNA polymerase II cis-regulatory region sequence-specific DNA binding; RNA polymerase II-specific DNA-binding transcription factor binding; transcription cis-regulatory region binding; transcription corepressor binding; histone deace…	histone deacetylase complex; cytoplasm; nucleus; nuclear speck; Golgi apparatus; cytosol; intracellular organelle; nucleoplasm; protein-containing complex	0.00010541	0.0790629	0.00473645	1
ENSG00000123143	1712	1428	1199	1236	1236	1241	1268.36	1181.84	1203.27	1383	1337.8	1368.21	1873.5	1745.71	1777.36	2042.84	1976.07	2020.99	51.6847	47.706	49.044	56.4484	54.2741	55.0017	19	14433053	14471867	677	PKN1	protein_coding	protein kinase N1	signal transduction; protein phosphorylation; phosphorylation; chromatin remodeling; chromatin organization; positive regulation of DNA-templated transcription; regulation of transcription by RNA polymerase II; intracellular signal transduction; regulation of cell motility; regulation of androgen receptor signaling pathway; post-translational protein modification; B cell homeostasis; B cell apopt…	ATP binding; protein serine/threonine kinase activity; protein kinase activity; small GTPase binding; nucleotide binding; kinase activity; transferase activity; protein binding; protein kinase C activity; protein serine kinase activity; nuclear receptor coactivator activity; histone binding; chromatin binding; histone H3T11 kinase activity; histone deacetylase binding; nuclear androgen receptor b…	nucleus; cytoplasm; membrane; plasma membrane; endosome; midbody; cleavage furrow; nucleoplasm; cytosol; cytoplasmic vesicle; protein-containing complex	0.0908844	0.161404	0.00484683	1
ENSG00000108819	5923	5426	4573	4324	4426	4356	4388.13	4490.68	4589.28	4838.27	4790.53	4802.51	1803.22	1845.36	1885.88	1988.19	1968.58	1973.5	49.7459	50.4292	52.0386	54.9384	54.0683	53.7093	17	50133737	50150677	2433.5	PPP1R9B	protein_coding	protein phosphatase 1 regulatory subunit 9B	RNA splicing; cell differentiation; nervous system development; regulation of cell cycle; negative regulation of cell growth; cell migration; actin filament organization; filopodium assembly; regulation of cell population proliferation; neuron projection development; calcium-mediated signaling; regulation of opioid receptor signaling pathway; cellular response to morphine; regulation of exit from…	protein binding; actin binding; protein phosphatase inhibitor activity; protein phosphatase 1 binding; actin filament binding; protein kinase activity; kinase binding; D2 dopamine receptor binding; transmembrane transporter binding; protein-containing complex binding	nucleus; cytoplasm; membrane; cell projection; plasma membrane; cytoskeleton; anchoring junction; adherens junction; nucleoplasm; synapse; lamellipodium; filopodium; postsynaptic density; dendritic spine; ruffle membrane; actin cytoskeleton; dendrite; protein phosphatase type 1 complex; growth cone; cortical actin cytoskeleton; dendritic spine membrane; neuronal cell body; dendritic spine neck; d…	0.0595852	0.100334	0.00490189	1
ENSG00000101888	457	391	362	237	253	266	338.575	323.6	363.289	265.187	273.837	293.266	183.659	175.536	197.065	143.85	148.542	159.081	5.06664	4.79697	5.43778	3.97491	4.07981	4.32944	X	109535781	109544698	1843.5	NXT2	protein_coding	nuclear transport factor 2 like export factor 2	nucleocytoplasmic transport; mRNA transport; protein transport; poly(A)+ mRNA export from nucleus; mRNA export from nucleus	protein binding	nucleus; cytoplasm; nucleoplasm; cytosol; perinuclear region of cytoplasm; nuclear pore central transport channel; nuclear RNA export factor complex	-0.159735	-0.298869	0.00503963	1
ENSG00000090372	3525	3214	2627	2512	2759	2532	2611.54	2659.98	2636.35	2810.76	2986.23	2791.54	3138.87	3197.09	3168.7	3378.32	3589.22	3355.22	86.593	87.3688	87.4365	93.3509	98.5805	91.3132	19	46719511	46746994	832	STRN4	protein_coding	striatin 4		protein binding; calmodulin binding; protein phosphatase 2A binding; protein-containing complex binding; armadillo repeat domain binding; protein domain specific binding	cytoplasm; membrane; cell projection; protein-containing complex; synapse; dendritic spine; dendrite; FAR/SIN/STRIPAK complex	0.0644604	0.119393	0.0050533	1
ENSG00000175093	28	25	20	29	40	40	20.7442	20.6905	20.0712	32.4491	43.2945	44.1002	17.8215	17.7754	17.2433	27.8772	37.1945	37.8868	0.491646	0.485759	0.475809	0.770313	1.02157	1.0311	3	141051347	141148611	1164	SPSB4	protein_coding	splA/ryanodine receptor domain and SOCS box containing 4	intracellular signal transduction; protein ubiquitination; ubiquitin-dependent protein catabolic process; rhythmic process; proteasome-mediated ubiquitin-dependent protein catabolic process; regulation of circadian rhythm; positive regulation of protein polyubiquitination	protein binding; ubiquitin ligase-substrate adaptor activity	cytoplasm; cytosol; SCF ubiquitin ligase complex	8.54269e-06	0.961927	0.00507131	1
ENSG00000180447	10197	9826	8221	7627	7870	7823	7554.58	8132.21	8250.27	8534.1	8518.18	8624.89	2402.09	2585.76	2623.3	2713.55	2708.48	2742.41	66.2672	70.6626	72.3869	74.9817	74.3904	74.6356	9	86944362	86947506	3145	GAS1	protein_coding	growth arrest specific 1	regulation of cell cycle; cell cycle; regulation of apoptotic process; cell fate commitment; cellular response to vascular endothelial growth factor stimulus; negative regulation of mitotic cell cycle; regulation of smoothened signaling pathway; developmental growth; negative regulation of protein processing; regulation of ER to Golgi vesicle-mediated transport	protein binding	membrane; plasma membrane; side of membrane	0.0615565	0.101912	0.00517096	1
ENSG00000205903	2403	2227	1762	1850	1787	1751	1780.29	1843.11	1768.27	2070.03	1934.18	1930.49	1895.95	1962.85	1883.15	2204.5	2059.83	2055.9	52.304	53.6399	51.9632	60.9156	56.5746	55.9518	7	6637318	6658279	939	ZNF316	protein_coding	zinc finger protein 316	regulation of DNA-templated transcription; regulation of transcription by RNA polymerase II	metal ion binding; DNA binding; DNA-binding transcription factor activity, RNA polymerase II-specific; sequence-specific DNA binding	nucleus	5.88512e-05	0.137983	0.00523435	1
ENSG00000106609	10617	8923	7680	7138	7620	7461	7865.75	7384.87	7707.35	7986.94	8247.59	8225.79	11399.6	10702.7	11170.1	11575.3	11953	11921.4	314.485	292.479	308.225	319.852	328.298	324.445	7	66921225	66958551	690	TMEM248	protein_coding	transmembrane protein 248		protein binding	membrane	0.0501238	0.0913894	0.00543934	1
ENSG00000153786	4691	4455	3623	3404	3613	3583	3475.39	3687.05	3635.9	3808.85	3910.57	3950.27	5660.25	6004.97	5921.66	6203.34	6369.01	6433.67	156.151	164.102	163.401	171.413	174.929	175.094	16	84974175	85011535	614	ZDHHC7	protein_coding	zinc finger DHHC-type palmitoyltransferase 7	protein targeting to membrane; androgen receptor signaling pathway; protein localization to plasma membrane; regulation of protein localization to plasma membrane; regulation of G protein-coupled receptor signaling pathway; steroid hormone mediated signaling pathway; progesterone receptor signaling pathway; glucose import in response to insulin stimulus; protein palmitoylation; regulation of Fas …	palmitoyltransferase activity; transferase activity; acyltransferase activity; protein-cysteine S-palmitoyltransferase activity; protein-cysteine S-myristoyltransferase activity; protein-cysteine S-stearoyltransferase activity; protein binding	membrane; Golgi apparatus; nucleoplasm; Golgi membrane; endoplasmic reticulum	0.0590499	0.112556	0.00557048	1
ENSG00000183087	35512	31798	25012	24722	25659	24497	26309.5	26316.7	25101.1	27662.3	27772.3	27008.1	10494.4	10497.3	10012.4	11034	11077.9	10773.1	289.513	286.866	276.28	304.896	304.262	293.192	13	113820549	113864076	2507	GAS6	protein_coding	growth arrest specific 6	response to stimulus; negative regulation of apoptotic process; signal transduction; positive regulation of protein phosphorylation; calcium ion transmembrane transport; cell surface receptor signaling pathway; phagocytosis; cellular response to interferon-alpha; negative regulation of type II interferon production; positive regulation of gene expression; negative regulation of DNA-templated tran…	calcium ion binding; metal ion binding; signaling receptor binding; receptor ligand activity; protein binding; protein-macromolecule adaptor activity; receptor tyrosine kinase binding; phosphatidylserine binding; cysteine-type endopeptidase inhibitor activity involved in apoptotic process	extracellular region; cytoplasm; endoplasmic reticulum; extracellular space; Golgi lumen; extracellular exosome; endoplasmic reticulum lumen; platelet alpha granule lumen	9.45171e-05	0.0847834	0.00559604	1
ENSG00000251493	1047	1002	763	811	840	805	775.684	829.277	765.717	907.455	909.183	887.516	531.655	568.387	524.823	621.97	623.155	608.305	14.6669	15.5327	14.4819	17.1865	17.1154	16.5552	5	73444827	73448777	1459	FOXD1	protein_coding	forkhead box D1	regulation of DNA-templated transcription; regulation of transcription by RNA polymerase II; anatomical structure morphogenesis; cell differentiation; positive regulation of gene expression; positive regulation of BMP signaling pathway; negative regulation of DNA-templated transcription; positive regulation of kidney development; branching involved in ureteric bud morphogenesis; kidney developmen…	DNA-binding transcription factor activity; sequence-specific DNA binding; DNA binding; RNA polymerase II cis-regulatory region sequence-specific DNA binding; DNA-binding transcription factor activity, RNA polymerase II-specific; DNA binding, bending; DNA-binding transcription activator activity, RNA polymerase II-specific	nucleus; chromatin	4.20856e-05	0.189238	0.00565161	1
ENSG00000106460	4895	4245	3625	2952	3100	3036	3626.53	3513.25	3637.91	3303.09	3355.32	3347.2	3276	3173.67	3286.28	2983.82	3031	3023.67	90.3758	86.7289	90.681	82.45	83.2485	82.2901	7	12211270	12243367	1107	TMEM106B	protein_coding	transmembrane protein 106B	lysosome organization; lysosomal transport; lysosomal lumen acidification; neuron cellular homeostasis; positive regulation of dendrite development; lysosomal protein catabolic process; regulation of lysosome organization; lysosome localization; dendrite morphogenesis	protein binding; ATPase binding	membrane; plasma membrane; endosome; lysosome; lysosomal membrane; late endosome membrane	-7.44014e-05	-0.107034	0.00571748	1
ENSG00000229127	25	35	27	6	10	12	18.5216	28.9668	27.0961	6.7136	10.8236	13.2301	9.16457	14.3329	13.4073	3.32192	5.35557	6.54629	0.252825	0.391684	0.369959	0.0917925	0.147094	0.178159	2	210030572	210064356	2021	KANSL1L-AS1	lncRNA	KANSL1L antisense RNA 1				-3.9627e-06	-1.26936	0.00576336	1
ENSG00000034510	76097	71648	54360	47280	48753	49099	56377.5	59297.4	54553.6	52903.2	52768.4	54131.9	122294	128628	118337	114757	114465	117423	3373.76	3515.09	3265.38	3171.02	3143.86	3195.69	2	84905656	84906671	461	TMSB10	protein_coding	thymosin beta 10	actin filament organization; regulation of cell migration; sequestering of actin monomers	actin monomer binding; actin binding; protein binding	cytoplasm; cytoskeleton	-8.67895e-05	-0.0912422	0.00585918	1
ENSG00000164938	7167	6380	5577	4475	4604	4635	5309.77	5280.23	5596.86	5007.23	4983.19	5110.11	945.135	939.877	996.237	891.283	887.005	909.596	26.0737	25.6846	27.49	24.6282	24.3622	24.7549	8	94925972	94949378	5618	TP53INP1	protein_coding	tumor protein p53 inducible nuclear protein 1	apoptotic process; autophagy; positive regulation of DNA-templated transcription; cellular oxidant detoxification; regulation of cell cycle; negative regulation of cell population proliferation; positive regulation of autophagy; autophagosome assembly; negative regulation of cell migration; autophagic cell death; response to heat; positive regulation of gene expression; negative regulation of gen…	protein binding; antioxidant activity	nucleus; cytoplasm; cytoplasmic vesicle; cytosol; autophagosome; PML body; nucleoplasm	-7.92746e-05	-0.0994704	0.0059569	1
ENSG00000185222	6324	5719	4878	3801	3970	4172	4685.22	4733.17	4895.37	4253.06	4296.97	4599.65	4557.61	4604.25	4762.03	4137.22	4179.94	4474.37	125.732	125.823	131.403	114.321	114.805	121.771	X	103356489	103358462	1028	TCEAL9	protein_coding	transcription elongation factor A like 9			nucleus	-6.45379e-05	-0.121923	0.00598777	1
ENSG00000153975	748	686	582	422	479	425	554.166	567.748	584.072	472.19	518.451	468.564	450.358	461.397	474.663	383.738	421.334	380.792	12.4242	12.6089	13.0978	10.6036	11.5722	10.3634	6	116635618	116668794	1230.5	ZUP1	protein_coding	zinc finger containing ubiquitin peptidase 1		metal ion binding; cysteine-type deubiquitinase activity; hydrolase activity; protein binding	nucleus; cytoplasm; nucleoplasm; cytosol	-4.08439e-05	-0.223769	0.00624907	1
ENSG00000104884	1975	1677	1327	1406	1437	1371	1463.21	1387.92	1331.73	1573.22	1555.35	1511.53	511.253	484.948	465.313	549.692	543.45	528.139	14.1041	13.2525	12.8398	15.1893	14.9262	14.3735	19	45349837	45370918	2862	ERCC2	protein_coding	ERCC excision repair 2, TFIIH core complex helicase subunit	nucleotide-excision repair; nucleobase-containing compound metabolic process; apoptotic process; DNA repair; cellular response to DNA damage stimulus; DNA duplex unwinding; chromosome segregation; cellular component organization; transcription by RNA polymerase II; response to oxidative stress; regulation of mitotic cell cycle phase transition; maturation of SSU-rRNA from tricistronic rRNA transc…	DNA binding; ATP binding; hydrolase activity, acting on acid anhydrides, in phosphorus-containing anhydrides; DNA helicase activity; nucleic acid binding; helicase activity; metal ion binding; nucleotide binding; hydrolase activity; protein binding; iron-sulfur cluster binding; 4 iron, 4 sulfur cluster binding; ATP hydrolysis activity; protein-macromolecule adaptor activity; damaged DNA binding; …	nucleus; cytoplasm; nucleoplasm; cytosol; cytoskeleton; transcription factor TFIIH holo complex; spindle; transcription factor TFIIH core complex; transcription factor TFIID complex; MMXD complex; CAK-ERCC2 complex	5.13308e-05	0.147644	0.00654141	1
ENSG00000261236	2672	2223	1771	1847	1961	1812	1979.59	1839.8	1777.31	2066.67	2122.51	1997.74	2858.61	2656.76	2566.51	2984.36	3065	2884.82	78.8613	72.6028	70.8198	82.4649	84.1822	78.5112	8	144262045	144291438	692.5	BOP1	protein_coding	BOP1 ribosomal biogenesis factor	rRNA processing; ribosome biogenesis; regulation of cell cycle; maturation of LSU-rRNA from tricistronic rRNA transcript (SSU-rRNA, 5.8S rRNA, LSU-rRNA); maturation of 5.8S rRNA from tricistronic rRNA transcript (SSU-rRNA, 5.8S rRNA, LSU-rRNA); ribosomal large subunit biogenesis; ribosomal large subunit assembly; regulation of signal transduction by p53 class mediator; cleavage in ITS2 between 5.…	protein binding; RNA binding; ribonucleoprotein complex binding	nucleus; nucleoplasm; nucleolus; chromosome; preribosome, large subunit precursor; PeBoW complex; ribonucleoprotein complex	9.89072e-05	0.142928	0.0066436	1
ENSG00000100387	2574	2372	1894	1549	1576	1635	1906.98	1963.12	1900.74	1733.23	1705.8	1802.6	1631.29	1679.31	1625.96	1482.66	1459.2	1542	45.003	45.8917	44.8664	40.9693	40.0778	41.9659	22	40951347	40973309	1169	RBX1	protein_coding	ring-box 1	protein ubiquitination; positive regulation of I-kappaB kinase/NF-kappaB signaling; DNA repair; cellular response to DNA damage stimulus; ubiquitin-dependent protein catabolic process; proteasome-mediated ubiquitin-dependent protein catabolic process; spermatogenesis; cellular response to amino acid stimulus; negative regulation of type I interferon production; protein neddylation; T cell activat…	zinc ion binding; metal ion binding; transferase activity; protein binding; ubiquitin protein ligase activity; ubiquitin-protein transferase activity; cullin family protein binding; RNA polymerase II-specific DNA-binding transcription factor binding; ubiquitin protein ligase binding; molecular adaptor activity; NEDD8 transferase activity; ubiquitin-ubiquitin ligase activity; NEDD8 ligase activity	nucleus; cytoplasm; nucleoplasm; cytosol; Cul3-RING ubiquitin ligase complex; SCF ubiquitin ligase complex; Cul5-RING ubiquitin ligase complex; Cul2-RING ubiquitin ligase complex; Cul4A-RING E3 ubiquitin ligase complex; cullin-RING ubiquitin ligase complex; Cul4B-RING E3 ubiquitin ligase complex; Cul7-RING ubiquitin ligase complex	-5.49774e-05	-0.138989	0.0067701	1
ENSG00000113504	5499	5174	4395	4355	4193	4017	4074.01	4282.11	4410.65	4872.95	4538.34	4428.76	4666.68	4905.06	5052.29	5581.85	5198.56	5073.04	128.741	134.044	139.412	154.24	142.782	138.064	5	1050384	1112063	873	SLC12A7	protein_coding	solute carrier family 12 member 7	monoatomic ion transport; transmembrane transport; potassium ion transport; potassium ion transmembrane transport; cell volume homeostasis; chloride ion homeostasis; potassium ion homeostasis; chloride transmembrane transport; potassium ion import across plasma membrane; chemical synaptic transmission; ammonium import across plasma membrane; cellular response to glucose stimulus	potassium:chloride symporter activity; transmembrane transporter activity; chloride:monoatomic cation symporter activity; symporter activity; protein kinase binding; ammonium transmembrane transporter activity	membrane; plasma membrane; synapse; protein-containing complex	7.4619e-05	0.117214	0.00685562	1
ENSG00000158470	3549	3253	2605	2538	2667	2555	2629.32	2692.25	2614.28	2839.85	2886.66	2816.9	556.824	570.151	553.637	601.409	611.321	596.548	15.3613	15.5809	15.277	16.6183	16.7903	16.2352	20	49632945	49713878	4722	B4GALT5	protein_coding	beta-1,4-galactosyltransferase 5	carbohydrate metabolic process; lipid metabolic process; sphingolipid metabolic process; regulation of protein stability; protein glycosylation; glycoprotein biosynthetic process; ganglioside biosynthetic process via lactosylceramide; O-glycan processing; central nervous system neuron axonogenesis; central nervous system myelination; poly-N-acetyllactosamine biosynthetic process; positive regulat…	glycosyltransferase activity; metal ion binding; transferase activity; N-acetyllactosamine synthase activity; galactosyltransferase activity; UDP-galactose:glucosylceramide beta-1,4-galactosyltransferase activity	membrane; Golgi apparatus; Golgi membrane; Golgi cisterna membrane	7.15731e-05	0.106234	0.00693082	1
ENSG00000133275	5319	4809	3883	3723	3935	3868	3940.65	3980.03	3896.83	4165.79	4259.09	4264.49	5212.5	5264.59	5154.53	5510.3	5633.72	5640.86	143.799	143.869	142.233	152.263	154.734	153.518	19	1941172	1981338	756	CSNK1G2	protein_coding	casein kinase 1 gamma 2	protein phosphorylation; phosphorylation; Wnt signaling pathway; signal transduction; endocytosis; sphingolipid biosynthetic process; positive regulation of canonical Wnt signaling pathway	ATP binding; protein serine/threonine kinase activity; protein kinase activity; nucleotide binding; kinase activity; transferase activity; protein binding; protein serine kinase activity	cytoplasm; membrane; cell cortex; nucleus; plasma membrane; cytosol	7.40401e-05	0.102511	0.00697354	1
ENSG00000140859	4113	3825	2966	2891	3004	3149	3047.17	3165.65	2976.56	3234.84	3251.41	3471.79	4365.58	4535.32	4264.41	4634.43	4658.19	4973.91	120.434	123.939	117.672	128.06	127.94	135.366	16	57758217	57863053	698	KIFC3	protein_coding	kinesin family member C3	microtubule-based movement; visual perception; epithelial cell-cell adhesion; microtubule-based process; zonula adherens maintenance; Golgi organization	ATP binding; microtubule binding; microtubule motor activity; nucleotide binding; protein binding; identical protein binding; cytoskeletal motor activity	cytoplasm; membrane; cytoplasmic vesicle membrane; cytoplasmic vesicle; cytoskeleton; anchoring junction; adherens junction; microtubule; centrosome; extracellular exosome; microtubule cytoskeleton; kinesin complex; zonula adherens; Golgi apparatus	0.000192086	0.115367	0.00717556	1
ENSG00000112874	1150	987	902	702	668	674	851.993	816.863	905.212	785.491	723.017	743.088	627.619	601.74	666.823	578.631	532.609	547.395	17.3143	16.4441	18.4002	15.9889	14.6285	14.8975	5	103548855	103562790	1357.5	NUDT12	protein_coding	nudix hydrolase 12	circadian regulation of gene expression; mRNA catabolic process; methylguanosine-cap decapping; NAD-cap decapping; NADH metabolic process; NADP catabolic process; NAD catabolic process; NAD biosynthesis via nicotinamide riboside salvage pathway	metal ion binding; protein binding; hydrolase activity; zinc ion binding; magnesium ion binding; NADH pyrophosphatase activity; NAD+ diphosphatase activity; RNA NAD-cap (NMN-forming) hydrolase activity; phosphodiesterase decapping endonuclease activity	cytoplasm; peroxisome; peroxisomal matrix; nucleus	-0.000132635	-0.191729	0.00728277	1
ENSG00000172354	16233	15022	11730	11583	11543	11918	12026.4	12432.5	11771.8	12960.6	12493.7	13139.7	9359.09	9675.12	9160.91	10086.1	9722.72	10225.4	258.192	264.398	252.785	278.702	267.041	278.287	7	100673567	100679174	1285	GNB2	protein_coding	G protein subunit beta 2	signal transduction; G protein-coupled receptor signaling pathway; regulation of potassium ion transmembrane transport	protein binding; GTPase activity; protein-containing complex binding; signaling receptor complex adaptor activity; GTPase binding	cytoplasm; membrane; plasma membrane; lysosomal membrane; focal adhesion; perinuclear region of cytoplasm; extracellular space; vesicle; heterotrimeric G-protein complex; cytosol; extracellular exosome	8.23033e-05	0.0909344	0.0073924	1
ENSG00000171522	1526	1263	1048	1078	1094	1107	1130.56	1045.29	1051.73	1206.21	1184.1	1220.47	2018.85	1866.58	1878.09	2153.95	2114.47	2179.42	55.6947	51.0092	51.8238	59.5186	58.0754	59.3134	5	40679915	40693735	560	PTGER4	protein_coding	prostaglandin E receptor 4	G protein-coupled receptor signaling pathway; signal transduction; immune response; bone development; adenylate cyclase-modulating G protein-coupled receptor signaling pathway; negative regulation of inflammatory response; positive regulation of cytokine production; positive regulation of inflammatory response; cellular response to mechanical stimulus; adenylate cyclase-activating G protein-coupl…	G protein-coupled receptor activity; prostaglandin E receptor activity; prostaglandin receptor activity; protein binding	membrane; plasma membrane	4.66796e-05	0.160319	0.00744375	1
ENSG00000119938	4653	3848	3283	2789	2880	2656	3447.24	3184.69	3294.69	3120.7	3117.2	2928.25	1356.65	1253.32	1296.61	1228.14	1226.76	1152.4	37.4262	34.2503	35.7785	33.9364	33.6938	31.3629	10	91628442	91633071	2541	PPP1R3C	protein_coding	protein phosphatase 1 regulatory subunit 3C	carbohydrate metabolic process; glycogen metabolic process; glycogen biosynthetic process; regulation of glycogen biosynthetic process	protein binding; protein phosphatase 1 binding; glycogen binding; protein phosphatase binding; protein serine/threonine phosphatase activity; molecular adaptor activity	cytosol; protein phosphatase type 1 complex	-6.45661e-05	-0.115482	0.00747941	1
ENSG00000224877	3169	2733	2214	1814	1927	1950	2347.8	2261.89	2221.88	2029.74	2085.71	2149.88	5049.02	4864.28	4778.24	4365.04	4485.4	4623.41	139.289	132.929	131.85	120.616	123.195	125.827	17	81239305	81241310	465	NDUFAF8	protein_coding	NADH:ubiquinone oxidoreductase complex assembly factor 8	mitochondrial respiratory chain complex I assembly	protein binding	mitochondrion	-6.11868e-05	-0.125729	0.00749423	1
ENSG00000014257	280	251	194	146	127	153	207.442	207.733	194.691	163.364	137.46	168.683	357.043	357.544	335.096	281.178	236.592	290.333	9.84984	9.77082	9.24659	7.7696	6.49816	7.90148	3	132317369	132368302	581	ACP3	protein_coding	acid phosphatase 3	lipid metabolic process; dephosphorylation; regulation of sensory perception of pain; lysosome organization; thiamine metabolic process; adenosine metabolic process; positive regulation of adenosine receptor signaling pathway; purine nucleobase metabolic process; nucleotide metabolic process	hydrolase activity; protein binding; protein tyrosine phosphatase activity; acid phosphatase activity; 5'-nucleotidase activity; XMP 5'-nucleosidase activity; identical protein binding; phosphatase activity; molecular adaptor activity; protein homodimerization activity; thiamine phosphate phosphatase activity; lysophosphatidic acid phosphatase activity; choline binding	nucleus; cytoplasm; extracellular region; membrane; plasma membrane; lysosome; lysosomal membrane; cytosol; extracellular space; extracellular exosome; azurophil granule membrane; vesicle membrane; multivesicular body; secretory granule; filopodium; Golgi cisterna; apical part of cell	-2.14259e-05	-0.379571	0.00756775	1
ENSG00000104419	1871	1531	1220	979	1140	1005	1386.16	1267.09	1224.34	1095.44	1233.89	1108.02	2766.78	2529.12	2443.8	2186.5	2462.86	2211.61	76.3279	69.1148	67.4338	60.4181	67.6441	60.1896	8	133237175	133302022	501	NDRG1	protein_coding	N-myc downstream regulated 1	signal transduction; DNA damage response, signal transduction by p53 class mediator; cellular response to hypoxia; response to metal ion; negative regulation of cell population proliferation; peripheral nervous system myelin maintenance; mast cell activation	protein binding; microtubule binding; small GTPase binding; cadherin binding; gamma-tubulin binding	nucleus; cytoplasm; membrane; cytosol; plasma membrane; cytoskeleton; adherens junction; microtubule cytoskeleton; microtubule; recycling endosome membrane; perinuclear region of cytoplasm; centrosome; extracellular exosome	-4.2288e-05	-0.175516	0.00760839	1
ENSG00000050820	3793	3835	2961	2928	2927	3014	2810.1	3173.93	2971.54	3276.24	3168.07	3322.95	1402.59	1584.19	1483.18	1635.26	1581.27	1658.57	38.6937	43.2922	40.9265	45.186	43.4306	45.1385	16	75228181	75268053	2003.5	BCAR1	protein_coding	BCAR1 scaffold protein, Cas family member	G protein-coupled receptor signaling pathway; cell adhesion; cell division; integrin-mediated signaling pathway; regulation of apoptotic process; actin filament organization; cell migration; positive regulation of cell migration; regulation of cell growth; positive regulation of endothelial cell migration; T cell receptor signaling pathway; B cell receptor signaling pathway; epidermal growth fact…	protein binding; SH3 domain binding; protein kinase binding	cytoplasm; cellular anatomical entity; cell projection; focal adhesion; anchoring junction; axon; plasma membrane; cytosol; ruffle; actin cytoskeleton; membrane; lamellipodium	5.50983e-05	0.125568	0.00760907	1
ENSG00000180340	2703	2543	1952	2092	1988	1972	2002.55	2104.64	1958.95	2340.81	2151.73	2174.14	529.916	556.931	518.378	619.425	569.393	575.321	14.619	15.2196	14.304	17.1162	15.6388	15.6575	17	44557484	44561262	3779	FZD2	protein_coding	frizzled class receptor 2	cell surface receptor signaling pathway; signal transduction; G protein-coupled receptor signaling pathway; Wnt signaling pathway; non-canonical Wnt signaling pathway; canonical Wnt signaling pathway; positive regulation of DNA-templated transcription; positive regulation of DNA-binding transcription factor activity; neuron differentiation; Wnt signaling pathway, planar cell polarity pathway; mem…	protein binding; transmembrane signaling receptor activity; G protein-coupled receptor activity; Wnt-protein binding; Wnt receptor activity; PDZ domain binding	membrane; cytoplasm; plasma membrane; focal adhesion; clathrin-coated endocytic vesicle membrane	5.49878e-05	0.135435	0.00763459	1
ENSG00000214353	871	703	635	480	520	427	645.292	581.818	637.261	537.088	562.828	470.77	242.865	218.976	239.842	202.141	211.828	177.181	6.69998	5.98408	6.61817	5.58562	5.81801	4.82203	16	70755035	70773251	2657	VAC14-AS1	lncRNA	VAC14 antisense RNA 1				4.5548e-06	-0.247027	0.00775096	1
ENSG00000167680	2848	2444	1964	2052	2252	1900	2109.98	2022.71	1970.99	2296.05	2437.48	2094.76	553.074	530.199	516.643	601.848	638.919	549.085	15.2578	14.4891	14.2562	16.6305	17.5484	14.9435	19	4542593	4581776	3815	SEMA6B	protein_coding	semaphorin 6B	cell differentiation; nervous system development; axon guidance; neural crest cell migration; positive regulation of cell migration; negative regulation of axon extension involved in axon guidance; negative chemotaxis; semaphorin-plexin signaling pathway; central nervous system development; hippocampus development	semaphorin receptor binding; protein binding; chemorepellent activity	membrane; plasma membrane	9.37622e-05	0.161161	0.00779308	1
ENSG00000160959	1945	1840	1462	1518	1490	1466	1440.98	1522.82	1467.21	1698.54	1612.72	1616.27	1473.39	1557.08	1500.21	1736.75	1649	1652.63	40.6469	42.5513	41.3966	47.9905	45.2908	44.9768	8	144517992	144525172	978	LRRC14	protein_coding	leucine rich repeat containing 14	negative regulation of NF-kappaB transcription factor activity; negative regulation of toll-like receptor signaling pathway	protein binding; kinase binding	cytoplasm; cytosol	5.85422e-05	0.153267	0.00802017	1
ENSG00000103966	1059	928	728	728	816	795	784.574	768.033	730.592	814.583	883.207	876.491	186.072	182.149	173.27	193.189	209.464	207.872	5.13323	4.97771	4.78118	5.33828	5.75308	5.65729	15	41895933	41972557	4216.5	EHD4	protein_coding	EH domain containing 4	pinocytosis; regulation of endocytosis; positive regulation of peptidyl-tyrosine phosphorylation; cellular response to growth factor stimulus; cilium assembly; endocytic recycling; protein homooligomerization; endocytosis; protein localization to plasma membrane	protein binding; GTP binding; calcium ion binding; metal ion binding; nucleotide binding; ATP binding; cadherin binding; nucleic acid binding	membrane; plasma membrane; endosome; recycling endosome membrane; early endosome membrane; perinuclear region of cytoplasm; cytoplasm; extracellular exosome; endoplasmic reticulum; early endosome; nucleus; endocytic vesicle	2.41467e-05	0.171322	0.00807598	1
ENSG00000272236	2	4	6	0	0	0	1.48173	3.31049	6.02137	0	0	0	6.09764	13.6234	24.7793	0	0	0	0.168217	0.372295	0.683755	0	0	0	6	29751965	29752207	243		lncRNA	novel transcript				-1.76702e-06	-4.12723	0.00811355	1
ENSG00000133985	116	128	68	108	111	112	85.9402	105.936	68.2421	120.845	120.142	123.481	16.8709	20.7961	13.3966	23.723	23.585	24.2404	0.465421	0.568309	0.369663	0.655521	0.647779	0.659709	14	70641916	70675366	5094	TTC9	protein_coding	tetratricopeptide repeat domain 9	bone development	protein binding		1.2647e-05	0.478663	0.00812008	1
ENSG00000167491	4722	4248	3582	3366	3602	3408	3498.36	3515.74	3594.76	3766.33	3898.67	3757.34	5341	5367.54	5488.18	5750.12	5952.16	5736.39	147.344	146.682	151.44	158.889	163.48	156.118	19	19385826	19508932	655	GATAD2A	protein_coding	GATA zinc finger domain containing 2A	negative regulation of transcription by RNA polymerase II; regulation of DNA-templated transcription; negative regulation of DNA-templated transcription; chromatin remodeling; positive regulation of DNA-templated transcription; DNA methylation; regulation of cell fate specification; regulation of stem cell differentiation	sequence-specific DNA binding; metal ion binding; protein binding; protein-macromolecule adaptor activity	nucleus; nucleoplasm; nuclear speck; chromosome; NuRD complex	9.70439e-05	0.107102	0.00823549	1
ENSG00000186654	285	273	254	253	258	257	211.146	225.941	254.904	283.09	279.249	283.344	138.775	148.499	167.535	186.06	183.535	186.227	3.82842	4.05811	4.62293	5.14127	5.04093	5.06821	22	44668547	44737681	1521.5	PRR5	protein_coding	proline rich 5	cell cycle; negative regulation of apoptotic process; cellular response to nutrient levels; positive regulation of cell growth; cytoskeleton organization; TORC2 signaling; positive regulation of protein phosphorylation; protein kinase B signaling; positive regulation of protein kinase B signaling	protein binding	TORC2 complex; cytosol	2.45443e-05	0.295268	0.00824873	1
ENSG00000103264	1380	1269	1052	992	1128	1038	1022.39	1050.25	1055.75	1109.98	1220.9	1144.4	845.301	868.336	872.878	917.719	1009.43	946.176	23.3196	23.7295	24.0861	25.3587	27.7246	25.7505	16	87326987	87392142	1209.5	FBXO31	protein_coding	F-box protein 31	protein ubiquitination; cellular response to DNA damage stimulus; cell cycle; anaphase-promoting complex-dependent catabolic process; mitotic G1 DNA damage checkpoint signaling; SCF-dependent proteasomal ubiquitin-dependent protein catabolic process	protein binding; cyclin binding	cytosol; SCF ubiquitin ligase complex; neuronal cell body	3.88314e-05	0.152771	0.00827871	1
ENSG00000105323	15407	13429	11641	10530	11565	10865	11414.5	11114.1	11682.5	11782.4	12517.5	11978.7	7749.14	7545.24	7931.06	7998.89	8497.97	8132.19	213.778	206.193	218.848	221.028	233.402	221.32	19	41262496	41307787	1473	HNRNPUL1	protein_coding	heterogeneous nuclear ribonucleoprotein U like 1	response to virus; RNA processing	protein binding; RNA binding; enzyme binding	nucleoplasm; nucleus; ribonucleoprotein complex; synapse	0.000149008	0.0849513	0.00839539	1
ENSG00000132153	4225	3888	3074	3042	3105	3045	3130.15	3217.79	3084.95	3403.79	3360.73	3357.13	2138.08	2197.95	2107.2	2325	2295.58	2293.12	58.9838	60.0646	58.1458	64.2451	63.0497	62.4079	3	47802909	47850195	1464	DHX30	protein_coding	DExH-box helicase 30	DNA duplex unwinding; ribosome biogenesis; mitochondrial large ribosomal subunit assembly; central nervous system development	ATP binding; nucleic acid binding; helicase activity; RNA binding; nucleotide binding; hydrolase activity; protein binding; RNA helicase activity; ATP hydrolysis activity; chromatin binding; DNA helicase activity; double-stranded RNA binding; G-quadruplex RNA binding	cytoplasm; cytosol; mitochondrion; nucleus; mitochondrial nucleoid; ribonucleoprotein granule	4.00918e-05	0.101233	0.00844115	1
ENSG00000117054	1988	1832	1493	1098	1259	1287	1472.84	1516.2	1498.32	1228.59	1362.69	1418.92	624.348	642.731	635.149	520.809	577.657	601.494	17.2241	17.5643	17.5262	14.3912	15.8657	16.3698	1	75724431	75787575	2359	ACADM	protein_coding	acyl-CoA dehydrogenase medium chain	fatty acid beta-oxidation; lipid metabolic process; fatty acid metabolic process; liver development; glycogen biosynthetic process; organic acid metabolic process; regulation of gluconeogenesis; heart development; response to cold; carnitine metabolic process; post-embryonic development; carnitine metabolic process, CoA-linked; fatty acid beta-oxidation using acyl-CoA dehydrogenase; response to s…	flavin adenine dinucleotide binding; oxidoreductase activity, acting on the CH-CH group of donors; acyl-CoA dehydrogenase activity; oxidoreductase activity; medium-chain-acyl-CoA dehydrogenase activity; identical protein binding	mitochondrion; mitochondrial matrix; nucleus; axon; cytoplasm; mitochondrial membrane	-3.19757e-05	-0.161766	0.00844728	1
ENSG00000101347	4110	3974	3308	3059	3085	3463	3044.95	3288.97	3319.78	3422.82	3339.08	3817.97	1342.27	1449.84	1463.42	1508.85	1471.94	1683.04	37.0297	39.6207	40.3815	41.693	40.4277	45.8044	20	36890229	36951893	2268.5	SAMHD1	protein_coding	SAM and HD domain containing deoxynucleoside triphosphate triphosphohydrolase 1	DNA repair; cellular response to DNA damage stimulus; metabolic process; DNA replication; immune system process; innate immune response; defense response to virus; immune response; regulation of innate immune response; double-strand break repair via homologous recombination; protein homotetramerization; somatic hypermutation of immunoglobulin genes; negative regulation of type I interferon-mediat…	protein binding; RNA binding; metal ion binding; nucleotide binding; hydrolase activity; zinc ion binding; GTP binding; catalytic activity; nucleic acid binding; identical protein binding; single-stranded DNA binding; ribonuclease activity; dGTPase activity; triphosphoric monoester hydrolase activity; dGTP binding; deoxynucleoside triphosphate hydrolase activity	nucleus; nucleoplasm; plasma membrane; chromosome; site of double-strand break; tetraspanin-enriched microdomain	5.16918e-05	0.132969	0.00848354	1
ENSG00000249959	10	7	5	0	0	1	7.40863	5.79335	5.0178	0	0	1.1025	9.20327	7.19671	6.2333	0	0	1.36957	0.253893	0.196669	0.172001	0	0	0.0372733	5	107699392	107716841	805		lncRNA	novel transcript				-2.25308e-06	-3.94993	0.0085167	1
ENSG00000145555	7654	6793	5765	5477	5811	5323	5670.57	5622.03	5785.53	6128.4	6289.6	5868.63	4565.68	4526.6	4658.24	4934.3	5064.09	4725.15	125.955	123.701	128.539	136.346	139.089	128.596	5	16661907	16936288	1242	MYO10	protein_coding	myosin X	signal transduction; cytoskeleton-dependent intracellular transport; regulation of cell shape; regulation of filopodium assembly; positive regulation of cell-cell adhesion	ATP binding; protein binding; cytoskeletal motor activity; nucleotide binding; actin binding; calmodulin binding; actin filament binding; phosphatidylinositol-3,4,5-trisphosphate binding; spectrin binding; microfilament motor activity; plus-end directed microfilament motor activity	cytoskeleton; myosin complex; cytoplasm; membrane; cell projection; nucleolus; cytosol; plasma membrane; cell cortex; lamellipodium; filopodium tip; ruffle; filopodium; filopodium membrane; neuron projection; neuronal cell body	0.000114595	0.0989462	0.00859247	1
ENSG00000162616	11671	10672	8781	7254	7385	7733	8646.62	8832.38	8812.27	8116.74	7993.24	8525.67	10525.4	10751.5	10727	9880.39	9730.05	10378.2	290.367	293.814	296	273.018	267.243	282.445	1	77979175	78017964	821.5	DNAJB4	protein_coding	DnaJ heat shock protein family (Hsp40) member B4	protein folding; negative regulation of transcription by RNA polymerase II; response to unfolded protein; chaperone cofactor-dependent protein refolding; response to heat	unfolded protein binding; protein binding; chaperone binding; ATPase activator activity	nucleoplasm; cytosol; plasma membrane; cytoplasm; membrane; Z disc	-7.66946e-05	-0.0937273	0.00863783	1
ENSG00000147099	404	382	290	220	227	227	299.309	316.151	291.033	246.165	245.696	250.269	178.479	188.522	173.544	146.789	146.509	149.236	4.92374	5.15186	4.78873	4.05613	4.02398	4.0615	X	72329516	72573101	1677	HDAC8	protein_coding	histone deacetylase 8	histone deacetylation; chromatin remodeling; chromatin organization; regulation of protein stability; negative regulation of transcription by RNA polymerase II; negative regulation of protein ubiquitination; regulation of telomere maintenance; mitotic sister chromatid cohesion	histone deacetylase activity; metal ion binding; protein lysine deacetylase activity; protein binding; hydrolase activity; protein decrotonylase activity; Hsp90 protein binding; Hsp70 protein binding; DNA-binding transcription factor binding; histone decrotonylase activity	nucleus; cytoplasm; chromosome; histone deacetylase complex; nucleoplasm; nuclear chromosome	-1.63012e-05	-0.289691	0.00873392	1
ENSG00000132485	5453	4532	3972	3273	3464	3171	4039.93	3750.78	3986.14	3662.27	3749.3	3496.04	3213.94	2983.92	3171.16	2913.5	2982.74	2781.26	88.664	81.5433	87.5044	80.5068	81.9229	75.6928	1	71063291	71081289	1257	ZRANB2	protein_coding	zinc finger RANBP2-type containing 2	RNA processing; mRNA processing; RNA splicing	RNA binding; metal ion binding; protein binding; lipopolysaccharide binding	nucleus; nucleoplasm	-0.00029196	-0.110564	0.00874307	1
ENSG00000173442	3167	2955	2578	2321	2436	2549	2346.31	2445.62	2587.18	2597.04	2636.63	2810.28	2958.78	3084.01	3262.52	3274.96	3324.88	3543.86	81.6248	84.2787	90.0255	90.4949	91.3202	96.4473	11	65576046	65592650	793	EHBP1L1	protein_coding	EH domain binding protein 1 like 1		protein binding	membrane; endosome	6.68184e-05	0.126034	0.00874992	1
ENSG00000176678	441	373	281	330	343	338	326.721	308.703	282.001	369.248	371.25	372.647	118.334	111.808	102.137	133.737	134.462	134.968	3.26452	3.05546	2.81836	3.69547	3.69309	3.67319	16	86576368	86583478	2761	FOXL1	protein_coding	forkhead box L1	regulation of DNA-templated transcription; regulation of transcription by RNA polymerase II; proteoglycan biosynthetic process; anatomical structure morphogenesis; cell differentiation; regulation of Wnt signaling pathway; heart development; visceral mesoderm-endoderm interaction involved in midgut development; Peyer's patch morphogenesis	DNA-binding transcription factor activity; sequence-specific DNA binding; DNA binding; RNA polymerase II cis-regulatory region sequence-specific DNA binding; DNA-binding transcription factor activity, RNA polymerase II-specific; DNA binding, bending	nucleus; chromatin	2.41597e-05	0.27517	0.00901767	1
ENSG00000109089	2299	2135	1714	1639	1702	1888	1703.25	1766.97	1720.1	1833.93	1842.18	2081.53	481.687	499.709	486.455	518.646	520.978	588.668	13.2884	13.6559	13.4231	14.3314	14.309	16.0208	17	74987632	75005800	3536	CDR2L	protein_coding	cerebellar degeneration related protein 2 like	vesicle transport along microtubule; Golgi to secretory granule transport	protein binding; identical protein binding	cytoplasm	4.8072e-05	0.149693	0.00922784	1
ENSG00000175745	564	652	415	468	504	517	417.847	539.609	416.478	523.661	545.51	569.995	259.532	335.161	258.682	325.255	338.826	354.034	7.15979	9.15915	7.13802	8.98756	9.30609	9.63514	5	93583222	93594611	1610	NR2F1	protein_coding	nuclear receptor subfamily 2 group F member 1	regulation of DNA-templated transcription; negative regulation of transcription by RNA polymerase II; intracellular receptor signaling pathway; cell differentiation; positive regulation of transcription by RNA polymerase II; anatomical structure development; signal transduction; nervous system development; negative regulation of neuron projection development	zinc ion binding; DNA-binding transcription factor activity; sequence-specific DNA binding; protein binding; metal ion binding; DNA binding; RNA polymerase II cis-regulatory region sequence-specific DNA binding; DNA-binding transcription repressor activity, RNA polymerase II-specific; sequence-specific double-stranded DNA binding; nuclear receptor activity; retinoic acid-responsive element binding	nucleus; nucleoplasm; cytosol	3.07057e-05	0.253587	0.0092493	1
ENSG00000104960	4652	4234	3407	3435	3322	3378	3446.5	3504.15	3419.13	3843.53	3595.6	3724.26	3463.82	3521.76	3436.31	3862.85	3613.67	3742.98	95.5573	96.2413	94.8211	106.74	99.252	101.866	19	49850735	49860744	995	PTOV1	protein_coding	PTOV1 extended AT-hook containing adaptor protein	positive regulation of transcription by RNA polymerase II		nucleus; cytoplasm; nucleoplasm; plasma membrane; perinuclear region of cytoplasm; membrane; transcription regulator complex	6.65138e-05	0.106074	0.00926747	1
ENSG00000047644	1845	1783	1469	1398	1454	1457	1366.89	1475.65	1474.23	1564.27	1573.75	1606.35	365.479	394.559	394.179	418.254	420.79	429.505	10.0826	10.7823	10.8769	11.5573	11.5573	11.6891	X	10015254	10144474	3740	WWC3	protein_coding	WWC family member 3	regulation of DNA-templated transcription; cell migration; negative regulation of transcription by RNA polymerase II; negative regulation of organ growth; regulation of hippo signaling; negative regulation of hippo signaling	protein binding; molecular adaptor activity; kinase binding	cellular anatomical entity; cytoplasm; cytosol	5.10244e-05	0.13775	0.00937229	1
ENSG00000183020	4092	3843	3172	3071	2997	3112	3031.61	3180.55	3183.3	3436.24	3243.84	3430.99	2849.26	2989.24	2991.82	3229.55	3048.72	3224.62	78.6034	81.6888	82.5558	89.2401	83.7351	87.7589	11	924881	1012245	1064	AP2A2	protein_coding	adaptor related protein complex 2 subunit alpha 2	intracellular protein transport; vesicle-mediated transport; protein transport; clathrin-dependent endocytosis; endocytosis; postsynaptic neurotransmitter receptor internalization	clathrin adaptor activity; protein binding; lipid binding; protein kinase binding; kinase binding; protein domain specific binding; disordered domain specific binding	membrane coat; membrane; clathrin adaptor complex; AP-2 adaptor complex; clathrin-coated pit; plasma membrane; postsynapse; cytosol; secretory granule membrane; endocytic vesicle membrane; cytoplasmic vesicle; clathrin-coated endocytic vesicle membrane; ficolin-1-rich granule membrane; endolysosome membrane; cytoplasmic side of plasma membrane; clathrin-coated endocytic vesicle; Golgi apparatus; …	3.42458e-05	0.106514	0.00939857	1
ENSG00000114268	1879	1504	1255	966	1177	953	1392.08	1244.74	1259.47	1080.89	1273.94	1050.69	1639.67	1466.13	1483.47	1273.13	1500.52	1237.56	45.2341	40.0658	40.9347	35.1796	41.2127	33.6805	3	48517684	48562015	849	PFKFB4	protein_coding	6-phosphofructo-2-kinase/fructose-2,6-biphosphatase 4	fructose 2,6-bisphosphate metabolic process; fructose metabolic process; phosphorylation; carbohydrate phosphorylation; metabolic process	ATP binding; catalytic activity; 6-phosphofructo-2-kinase activity; nucleotide binding; kinase activity; transferase activity; hydrolase activity; protein binding; fructose-2,6-bisphosphate 2-phosphatase activity	cytosol	-2.44553e-05	-0.195002	0.00941973	1
ENSG00000128283	1421	1287	1104	1069	1191	1012	1052.77	1065.15	1107.93	1196.14	1289.09	1115.73	1609.74	1628.67	1694.08	1828.96	1971.09	1706.02	44.4082	44.5076	46.7463	50.5385	54.1373	46.4297	22	37560480	37569405	654	CDC42EP1	protein_coding	CDC42 effector protein 1	positive regulation of pseudopodium assembly; Rho protein signal transduction; regulation of cell shape; positive regulation of actin filament polymerization; cell-cell adhesion	protein binding; small GTPase binding; cadherin binding involved in cell-cell adhesion	cytoplasm; membrane; cytoskeleton; focal adhesion; endomembrane system; plasma membrane; cytosol; adherens junction	5.03716e-05	0.160101	0.00949081	1
ENSG00000163728	3034	2768	2512	1824	2009	1968	2247.78	2290.86	2520.94	2040.93	2174.46	2169.73	2688.73	2740.26	3015.48	2441.31	2601.03	2595.37	74.1748	74.8848	83.2088	67.4591	71.4391	70.6337	3	180602163	180617828	836	TTC14	protein_coding	tetratricopeptide repeat domain 14		protein binding; nucleic acid binding		-4.00494e-05	-0.143192	0.0095822	1
ENSG00000167394	1986	1915	1491	1538	1453	1582	1471.35	1584.9	1496.31	1720.92	1572.67	1744.16	629.053	677.595	639.722	735.75	672.369	745.687	17.3539	18.5171	17.6524	20.3305	18.4671	20.2941	16	31060843	31074240	2339	ZNF668	protein_coding	zinc finger protein 668	DNA repair; positive regulation of transcription by RNA polymerase II; regulation of transcription by RNA polymerase II; negative regulation of transcription by RNA polymerase II	metal ion binding; DNA binding; RNA polymerase II cis-regulatory region sequence-specific DNA binding; DNA-binding transcription activator activity, RNA polymerase II-specific; DNA-binding transcription repressor activity, RNA polymerase II-specific	nucleus	4.75599e-05	0.145948	0.00959153	1
ENSG00000241360	83	67	40	73	74	71	61.4917	55.4507	40.1424	81.6821	80.0947	78.2778	34.3241	30.9521	22.4072	45.5943	44.7082	43.694	0.946909	0.845847	0.6183	1.25988	1.22794	1.18915	22	37658723	37666932	1791.5	PDXP	protein_coding	pyridoxal phosphatase	dephosphorylation; pyridoxal phosphate catabolic process; protein dephosphorylation; regulation of mitotic nuclear division; regulation of cytokinesis; positive regulation of actin filament depolymerization; actin rod assembly; cellular response to ATP	phosphatase activity; metal ion binding; hydrolase activity; protein serine/threonine phosphatase activity; phosphoprotein phosphatase activity; myosin phosphatase activity; protein binding; magnesium ion binding; pyridoxal phosphatase activity; protein homodimerization activity; heat shock protein binding	cytoplasm; membrane; cell projection; plasma membrane; cytoskeleton; cytosol; cell-cell junction; midbody; actin cytoskeleton; lamellipodium; cleavage furrow; ruffle membrane; lamellipodium membrane; contractile ring	-4.62433e-05	0.599254	0.00959941	1
ENSG00000173621	969	925	727	693	767	831	717.897	765.55	729.589	775.421	830.171	916.181	463.159	493.903	470.702	500.271	535.594	591.085	12.7773	13.4972	12.9885	13.8237	14.7105	16.0865	11	66856647	66860475	1550	LRFN4	protein_coding	leucine rich repeat and fibronectin type III domain containing 4	regulation of postsynaptic density assembly; synaptic membrane adhesion; regulation of presynapse assembly	protein binding	membrane; cell surface; postsynaptic density membrane; glutamatergic synapse; GABA-ergic synapse; plasma membrane	-7.40269e-05	0.188665	0.00964276	1
ENSG00000091542	7843	7083	5934	5490	5679	5837	5810.59	5862.04	5955.13	6142.94	6146.73	6435.32	2707.64	2731.61	2774.99	2862.51	2864.27	2998.75	74.6964	74.6485	76.5726	79.0978	78.6692	81.6119	17	18183078	18209954	2146	ALKBH5	protein_coding	alkB homolog 5, RNA demethylase	mRNA processing; oxidative single-stranded RNA demethylation; regulation of translation; cell differentiation; mRNA export from nucleus; spermatogenesis; mRNA destabilization; response to hypoxia; non-membrane-bounded organelle assembly; regulation of mRNA stability; gamma-delta T cell proliferation	oxidative RNA demethylase activity; metal ion binding; RNA binding; oxidoreductase activity; dioxygenase activity; mRNA N6-methyladenosine dioxygenase activity; 2-oxoglutarate-dependent dioxygenase activity; molecular condensate scaffold activity	nucleus; nuclear speck; Golgi apparatus; nucleoplasm; cytosol; paraspeckles	-1.14491e-05	0.0874456	0.00973187	1
ENSG00000166396	531	499	388	280	326	307	393.399	412.983	389.382	313.301	352.85	338.469	201.639	211.678	199.581	160.585	180.856	173.485	5.56268	5.78465	5.50719	4.43734	4.96733	4.72144	18	63752935	63805376	1951	SERPINB7	protein_coding	serpin family B member 7	positive regulation of transforming growth factor beta1 production; positive regulation of collagen biosynthetic process; positive regulation of glomerular mesangial cell proliferation; positive regulation of platelet-derived growth factor production	serine-type endopeptidase inhibitor activity; peptidase inhibitor activity	extracellular space; cytoplasm	-3.23699e-05	-0.251383	0.00978758	1
ENSG00000261324	142	116	96	68	63	58	105.203	96.0041	96.3418	76.0874	68.1888	63.9453	19.3815	17.6868	17.7491	14.0176	12.5624	11.7806	0.534682	0.483339	0.489764	0.387339	0.345035	0.320613	12	14762504	14767931	5428		lncRNA	novel transcript, overlapping HIST4H4				-1.34591e-05	-0.517391	0.00992767	1
ENSG00000107954	11	9	1	0	0	1	8.1495	7.4486	1.00356	0	0	1.1025	11.8624	10.8422	1.46079	0	0	1.60481	0.327253	0.296292	0.0403087	0	0	0.0436754	10	103493705	103592546	687	NEURL1	protein_coding	neuralized E3 ubiquitin protein ligase 1	protein ubiquitination; regulation of translation; Notch signaling pathway; negative regulation of cell population proliferation; cellular response to amino acid stimulus; positive regulation of apoptotic process; nervous system development; positive regulation of filopodium assembly; negative regulation of Notch signaling pathway; protein monoubiquitination; sperm axoneme assembly; skeletal musc…	metal ion binding; transferase activity; ubiquitin-protein transferase activity; ubiquitin protein ligase activity; translation factor activity, non-nucleic acid binding	cytoplasm; membrane; cell projection; plasma membrane; dendrite; synapse; perinuclear region of cytoplasm; perikaryon; postsynaptic density; dendritic spine; apical dendrite	-2.19582e-06	-3.83315	0.00999528	1
ENSG00000214706	3014	2716	2074	2153	2172	2180	2232.96	2247.82	2081.39	2409.06	2350.89	2403.46	2506.13	2522.81	2336.01	2703.77	2638.48	2697.49	69.1373	68.9423	64.4595	74.7117	72.4677	73.4129	3	50287732	50292918	891	IFRD2	protein_coding	interferon related developmental regulator 2	regulation of translation; negative regulation of translation	protein binding; translation repressor activity; ribosome binding	nucleus	-4.63906e-05	0.12509	0.0101353	1
ENSG00000146834	1101	1022	803	839	868	810	815.691	845.829	805.859	938.785	939.49	893.029	462.672	479.767	457.096	532.493	532.893	506.539	12.7639	13.1109	12.613	14.714	14.6363	13.7856	7	100428322	100434126	1763	MEPCE	protein_coding	methylphosphate capping enzyme	methylation; RNA methylation; positive regulation of snRNA transcription by RNA polymerase II; positive regulation of protein localization to Cajal body; snRNA metabolic process; snRNA modification; negative regulation of transcription by RNA polymerase II; positive regulation of G1/S transition of mitotic cell cycle	methyltransferase activity; S-adenosylmethionine-dependent methyltransferase activity; RNA binding; transferase activity; protein binding; RNA methyltransferase activity; snRNA binding; 7SK snRNA binding; O-methyltransferase activity; RNA 5'-methyltransferase activity	nucleus; ribonucleoprotein complex; 7SK snRNP	4.47773e-05	0.167081	0.0101384	1
ENSG00000184007	8019	7275	5846	5600	5913	5633	5940.98	6020.95	5866.82	6266.02	6400	6210.41	8077.48	8186.2	7976.64	8519.41	8701.57	8443.79	222.836	223.709	220.106	235.411	238.994	229.8	1	31906421	31944856	735.5	PTP4A2	protein_coding	protein tyrosine phosphatase 4A2	protein dephosphorylation; dephosphorylation	phosphatase activity; protein tyrosine phosphatase activity; protein tyrosine/serine/threonine phosphatase activity; hydrolase activity; phosphoprotein phosphatase activity; protein binding; prenylated protein tyrosine phosphatase activity	cytoplasm; membrane; plasma membrane; endosome; early endosome; nucleus; cytosol	9.89057e-05	0.0821805	0.0101463	1
ENSG00000130203	986	963	784	762	827	801	730.491	797	786.792	852.627	895.113	883.106	845.476	922.453	910.639	986.837	1036.01	1022.11	23.3244	25.2085	25.128	27.2686	28.4547	27.8171	19	44905791	44909393	864	APOE	protein_coding	apolipoprotein E	lipid transport; lipoprotein metabolic process; negative regulation of gene expression; lipid metabolic process; steroid metabolic process; cholesterol metabolic process; positive regulation of DNA-templated transcription; intermembrane lipid transfer; cytoskeleton organization; cellular oxidant detoxification; intracellular transport; response to dietary excess; cholesterol catabolic process; ce…	lipid binding; protein binding; identical protein binding; heparin binding; heparan sulfate proteoglycan binding; phosphatidylcholine-sterol O-acyltransferase activator activity; lipoprotein particle binding; cholesterol transfer activity; amyloid-beta binding; protein homodimerization activity; signaling receptor binding; low-density lipoprotein particle receptor binding; enzyme binding; protein…	extracellular region; high-density lipoprotein particle; cytoplasm; extracellular space; nucleus; membrane; endosome; very-low-density lipoprotein particle; low-density lipoprotein particle; chylomicron; melanosome; endoplasmic reticulum; multivesicular body; plasma membrane; glutamatergic synapse; extracellular matrix; extracellular exosome; collagen-containing extracellular matrix; blood microp…	3.68082e-05	0.186458	0.010247	1
ENSG00000176845	1295	1247	928	926	1039	1000	959.418	1032.04	931.305	1036.13	1124.57	1102.5	992.159	1067.26	963.086	1071.49	1162.95	1140.13	27.371	29.1658	26.5752	29.6078	31.9412	31.0289	17	83079609	83095122	967	METRNL	protein_coding	meteorin like, glial cell differentiation regulator	signal transduction; negative regulation of inflammatory response; energy homeostasis; positive regulation of brown fat cell differentiation; response to muscle activity; brown fat cell differentiation; response to cold; fat cell differentiation	hormone activity	extracellular region; extracellular space; extracellular exosome	-3.48812e-05	0.158076	0.0102694	1
ENSG00000185040	3	9	1	0	0	0	2.22259	7.4486	1.00356	0	0	0	0.787594	2.63947	0.35562	0	0	0	0.0217276	0.0721305	0.00981293	0	0	0	7	76531313	76543297	2822	SPDYE16	protein_coding	speedy/RINGO cell cycle regulator family member E16	positive regulation of cyclin-dependent protein serine/threonine kinase activity	protein kinase binding		-1.60891e-06	-4.14659	0.0102988	1
ENSG00000159335	15613	14962	12011	11189	11644	11917	11567.1	12382.9	12053.8	12519.7	12603	13138.5	11851.5	12687.4	12350.2	12827.6	12912.9	13461.6	326.952	346.716	340.789	354.457	354.662	366.362	12	6765516	6770952	976	PTMS	protein_coding	parathymosin	immune system process; positive regulation of transcription by RNA polymerase II; negative regulation of apoptotic process; DNA replication	histone binding	nucleus	1.83543e-05	0.08793	0.0103541	1
ENSG00000210107	213	155	150	170	181	160	157.804	128.281	150.534	190.219	195.907	176.401	2191.72	1781.69	2090.75	2641.93	2720.94	2450.01	60.4636	48.6892	57.6919	73.0026	74.7324	66.6777	MT	4329	4400	72	MT-TQ	Mt_tRNA	mitochondrially encoded tRNA-Gln (CAA/G)	translation	triplet codon-amino acid adaptor activity		1.86437e-05	0.365189	0.0103739	1
ENSG00000213024	3050	2631	2189	2141	2519	2023	2259.63	2177.47	2196.79	2395.64	2726.47	2230.37	893.489	861.001	868.642	947.266	1078.08	881.917	24.6489	23.5291	23.9692	26.1752	29.6102	24.0016	19	49906825	49929764	2529	NUP62	protein_coding	nucleoporin 62	mRNA transport; protein transport; negative regulation of apoptotic process; negative regulation of cell population proliferation; negative regulation of epidermal growth factor receptor signaling pathway; negative regulation of Ras protein signal transduction; cellular senescence; positive regulation of I-kappaB kinase/NF-kappaB signaling; positive regulation of DNA-templated transcription; mito…	structural constituent of nuclear pore; Hsp70 protein binding; PTB domain binding; Hsp90 protein binding; protein binding; ubiquitin binding; chromatin binding; SH2 domain binding; phospholipid binding; signaling receptor complex adaptor activity	nuclear pore; nucleus; cytoplasm; nuclear membrane; nucleoplasm; cytoskeleton; nuclear envelope; spindle pole; centrosome; mitotic spindle; Flemming body; ribonucleoprotein complex; nuclear pore central transport channel	4.48219e-05	0.148303	0.0103773	1
ENSG00000171206	11358	10687	8866	8081	8476	8729	8414.73	8844.79	8897.57	9042.1	9174.09	9623.76	5777.36	6072.63	6108.87	6208.1	6298.73	6607.46	159.382	165.951	168.567	171.544	172.999	179.824	10	102642503	102658318	1456.5	TRIM8	protein_coding	tripartite motif containing 8	protein ubiquitination; positive regulation of DNA-templated transcription; positive regulation of I-kappaB kinase/NF-kappaB signaling; immune system process; innate immune response; positive regulation of autophagy; positive regulation of NF-kappaB transcription factor activity; protein K63-linked ubiquitination; positive regulation of DNA-binding transcription factor activity; I-kappaB kinase/N…	metal ion binding; transferase activity; zinc ion binding; protein homodimerization activity; protein binding; ubiquitin protein ligase activity; identical protein binding; transcription coactivator activity; mitogen-activated protein kinase kinase kinase binding	nucleus; cytoplasm; nuclear body; PML body; cytosol	7.8573e-05	0.0903787	0.010387	1
ENSG00000177733	6795	6139	4818	4646	5078	4758	5034.17	5080.77	4835.16	5198.56	5496.23	5245.72	577.777	583.125	554.936	596.644	630.808	602.056	15.9393	15.9354	15.3128	16.4867	17.3256	16.3851	5	137745651	137754363	8713	HNRNPA0	protein_coding	heterogeneous nuclear ribonucleoprotein A0	inflammatory response; response to lipopolysaccharide; 3'-UTR-mediated mRNA stabilization; mRNA processing	RNA binding; nucleic acid binding; mRNA binding; protein kinase binding; mRNA 3'-UTR AU-rich region binding	nucleus; nucleoplasm; ribonucleoprotein complex; synapse	7.41648e-05	0.0920094	0.0105193	1
ENSG00000002834	45762	40377	33940	31028	34059	32039	33903.4	33416.9	34060.9	34718.3	36864.1	35323.1	23462.6	23125.9	23571.5	24026.5	25511.5	24445.1	647.268	631.975	650.429	663.908	700.691	665.28	17	38869859	38921770	1445	LASP1	protein_coding	LIM and SH3 protein 1	monoatomic ion transport; monoatomic ion transmembrane transport	protein binding; metal ion binding; actin binding; monoatomic ion transmembrane transporter activity; cadherin binding; actin filament binding	cytoplasm; cytoskeleton; focal adhesion; cell cortex; cortical actin cytoskeleton	8.90382e-05	0.076595	0.0105703	1
ENSG00000123612	216	174	167	97	117	107	160.027	144.006	167.595	108.537	126.636	117.968	97.3693	87.6216	101.974	66.0399	77.0528	71.7785	2.68616	2.39449	2.81386	1.82484	2.11631	1.95347	2	157526767	157628864	1643.5	ACVR1C	protein_coding	activin A receptor type 1C	protein phosphorylation; transmembrane receptor protein serine/threonine kinase signaling pathway; phosphorylation; apoptotic process; cell differentiation; regulation of primary metabolic process; positive regulation of macromolecule metabolic process; regulation of multicellular organismal process; positive regulation of nitrogen compound metabolic process; nervous system development; cellular …	ATP binding; transmembrane receptor protein serine/threonine kinase activity; protein kinase activity; metal ion binding; nucleotide binding; protein serine/threonine kinase activity; kinase activity; transferase activity; growth factor binding; ion binding; activin receptor activity, type I; nodal binding	membrane; plasma membrane; plasma membrane signaling receptor complex; activin receptor complex	-2.58137e-05	-0.415156	0.0105951	1
ENSG00000104964	11454	10283	8582	8040	8207	8222	8485.85	8510.43	8612.56	8996.22	8882.94	9064.79	8385.23	8409.52	8510.43	8889.55	8777.61	8957.31	231.326	229.812	234.836	245.639	241.083	243.776	19	3052910	3063107	1012	TLE5	protein_coding	TLE family member 5, transcriptional modulator	regulation of DNA-templated transcription; Wnt signaling pathway; negative regulation of gene expression; negative regulation of canonical Wnt signaling pathway; negative regulation of DNA-templated transcription; negative regulation of transcription by RNA polymerase II; response to interleukin-1; negative regulation of response to cytokine stimulus; negative regulation of protein binding; skele…	protein binding; transcription corepressor activity; identical protein binding	nucleus	0.000113318	0.073496	0.0106625	1
ENSG00000108679	25462	23061	19511	17889	19221	17881	18863.9	19085.8	19580.5	20016.6	20804.1	19713.9	21387.6	21639.2	22200.1	22694.5	23587.4	22351.3	590.026	591.348	612.586	627.104	647.843	608.298	17	78971238	78979947	882	LGALS3BP	protein_coding	galectin 3 binding protein	cell adhesion; endocytosis; signal transduction; cellular defense response	scavenger receptor activity; protein binding	membrane; extracellular region; extracellular space; extracellular exosome; blood microparticle; collagen-containing extracellular matrix; platelet dense granule lumen	9.18199e-05	0.0736845	0.0108845	1
ENSG00000131504	6298	5514	4846	4377	4648	4655	4665.96	4563.51	4863.26	4897.57	5030.82	5132.16	3954.2	3867.38	4121.4	4150.48	4263.4	4349.29	109.086	105.686	113.725	114.688	117.097	118.367	5	141515016	141619055	1180	DIAPH1	protein_coding	diaphanous related formin 1	actin cytoskeleton organization; cellular component organization; cytoskeleton organization; sensory perception of sound; regulation of cytoskeleton organization; regulation of cell shape; actin filament polymerization; regulation of microtubule-based process; protein localization to microtubule; regulation of release of sequestered calcium ion into cytosol; cellular response to histamine	small GTPase binding; actin binding; RNA binding; protein binding; transmembrane transporter binding; signaling receptor binding	nucleus; cytoplasm; membrane; cell projection; plasma membrane; cytoskeleton; spindle; centrosome; ruffle membrane; cytosol; actin filament; secretory granule membrane; ficolin-1-rich granule membrane; mitotic spindle	0.00012968	0.0965332	0.0109427	1
ENSG00000169299	1652	1452	1154	962	1016	959	1223.91	1201.71	1158.11	1076.41	1099.68	1057.3	799.678	785.173	756.687	703.308	718.51	690.821	22.0609	21.4569	20.8799	19.4341	19.7344	18.8009	4	37826660	37862937	1530.5	PGM2	protein_coding	phosphoglucomutase 2	carbohydrate metabolic process; organic substance metabolic process; glucose metabolic process; glycogen biosynthetic process; glycogen catabolic process; purine ribonucleoside salvage	intramolecular transferase activity, phosphotransferases; magnesium ion binding; metal ion binding; isomerase activity; protein binding; phosphoglucomutase activity; phosphopentomutase activity	cytoplasm; cytosol; extracellular region; extracellular exosome; secretory granule lumen; ficolin-1-rich granule lumen	-4.62238e-05	-0.149606	0.0109487	1
ENSG00000185551	4700	4636	3815	3456	3639	4065	3482.06	3836.85	3828.58	3867.03	3938.71	4481.68	1572.75	1733	1729.26	1746.63	1779	2024.25	43.3878	47.3587	47.717	48.2634	48.8615	55.0904	15	96325938	96340263	2214	NR2F2	protein_coding	nuclear receptor subfamily 2 group F member 2	regulation of DNA-templated transcription; negative regulation of transcription by RNA polymerase II; intracellular receptor signaling pathway; positive regulation of DNA-templated transcription; cell differentiation; female gonad development; positive regulation of transcription by RNA polymerase II; anatomical structure development; negative regulation of DNA-templated transcription; regulation…	protein binding; zinc ion binding; metal ion binding; DNA binding; DNA-binding transcription factor activity; protein homodimerization activity; sequence-specific DNA binding; nuclear receptor activity; RNA polymerase II cis-regulatory region sequence-specific DNA binding; retinoic acid binding	nucleus; nucleoplasm; cytosol	7.03303e-05	0.141107	0.0110178	1
ENSG00000176022	1973	1698	1327	1382	1460	1365	1461.72	1405.3	1331.73	1546.37	1580.25	1504.92	521.114	500.999	474.768	551.289	563.368	536.513	14.3761	13.6911	13.1007	15.2334	15.4733	14.6014	1	1232237	1235041	2805	B3GALT6	protein_coding	beta-1,3-galactosyltransferase 6	protein glycosylation; heparan sulfate proteoglycan biosynthetic process; proteoglycan biosynthetic process; chondroitin sulfate biosynthetic process; protein O-linked glycosylation; glycosaminoglycan biosynthetic process; glycosaminoglycan metabolic process	hexosyltransferase activity; transferase activity; glycosyltransferase activity; UDP-galactosyltransferase activity; galactosylxylosylprotein 3-beta-galactosyltransferase activity	membrane; Golgi apparatus; organelle membrane; Golgi cisterna membrane; Golgi membrane; Golgi medial cisterna	-2.74498e-05	0.139617	0.0110461	1
ENSG00000204469	15762	13788	11559	10992	11315	10965	11677.5	11411.2	11600.2	12299.3	12246.9	12089	13968.3	13649.8	13875.8	14712.1	14649.4	14460.5	385.347	373.017	382.886	406.53	402.356	393.546	6	31620715	31637771	836	PRRC2A	protein_coding	proline rich coiled-coil 2A	cell differentiation	RNA binding; protein binding	nucleus; cytoplasm; membrane; nucleoplasm; cytosol; plasma membrane; extracellular exosome	8.53871e-05	0.0787336	0.0111322	1
ENSG00000090263	2743	2390	1948	1580	1695	1679	2032.19	1978.02	1954.94	1767.91	1834.6	1851.11	2953.76	2875.02	2841.48	2569.64	2666.57	2690.56	81.4863	78.5675	78.4073	71.0053	73.2392	73.2244	7	141002610	141015228	688	MRPS33	protein_coding	mitochondrial ribosomal protein S33	translation; mitochondrial translation	structural constituent of ribosome	mitochondrion; ribonucleoprotein complex; ribosome; mitochondrial inner membrane; mitochondrial small ribosomal subunit	-5.15012e-05	-0.129906	0.0112764	1
ENSG00000085117	37325	32866	26278	25328	27001	25432	27652.7	27200.6	26371.6	28340.3	29224.8	28038.9	44673.2	43942.8	42603.5	45784.1	47213	45297.1	1232.41	1200.85	1175.59	1265.12	1296.74	1232.77	11	44564427	44620358	619	CD82	protein_coding	CD82 molecule		protein binding	membrane; plasma membrane; extracellular exosome	8.85603e-05	0.0755945	0.0113098	1
ENSG00000154122	1276	1032	916	865	953	951	945.342	854.106	919.262	967.877	1031.49	1048.48	1356.3	1225.4	1318.88	1388.63	1479.9	1504.28	37.4167	33.4873	36.3931	38.3712	40.6465	40.9394	5	14704800	14871778	697	ANKH	protein_coding	ANKH inorganic pyrophosphate transport regulator	phosphate ion transmembrane transport; skeletal system development; regulation of bone mineralization; transmembrane transport; locomotory behavior; ATP export; gene expression; bone mineralization; inorganic diphosphate transport; muscle cell cellular homeostasis; phosphate ion homeostasis; calcium ion homeostasis; diphosphate metabolic process; cementum mineralization; inhibition of non-skeleta…	phosphate ion transmembrane transporter activity; inorganic phosphate transmembrane transporter activity; ATP transmembrane transporter activity; inorganic diphosphate transmembrane transporter activity	membrane; plasma membrane; outer membrane; extracellular region	6.83327e-05	0.164763	0.0113666	1
ENSG00000130589	1810	1634	1325	1294	1445	1299	1340.96	1352.33	1329.72	1447.9	1564.01	1432.15	546.662	551.298	542.078	590.257	637.592	583.838	15.0809	15.0657	14.958	16.3102	17.5119	15.8893	20	63558086	63574239	2453	HELZ2	protein_coding	helicase with zinc finger 2	positive regulation of transcription by RNA polymerase II; RNA-mediated post-transcriptional gene silencing	RNA binding; ribonuclease activity; helicase activity; metal ion binding; nucleotide binding; ATP binding; hydrolase activity; DNA binding; RNA helicase activity; protein binding; nuclear receptor coactivator activity; exoribonuclease II activity	nucleus; cytoplasm; membrane; cytosol; nucleoplasm; P granule	4.58794e-05	0.143583	0.0114169	1
ENSG00000128609	4324	3811	3123	2612	2657	2750	3203.49	3154.07	3134.12	2922.65	2875.83	3031.89	1776.76	1749.34	1738.28	1620.99	1595.03	1681.58	49.0159	47.8054	47.9658	44.7919	43.8085	45.7647	7	123536997	123557904	1803	NDUFA5	protein_coding	NADH:ubiquinone oxidoreductase subunit A5	respiratory electron transport chain; mitochondrial respiratory chain complex I assembly; mitochondrial electron transport, NADH to ubiquinone; aerobic respiration; proton motive force-driven mitochondrial ATP synthesis	protein binding; NADH dehydrogenase (ubiquinone) activity	membrane; mitochondrion; mitochondrial inner membrane; respirasome; mitochondrial respiratory chain complex I; respiratory chain complex I	-7.33695e-05	-0.104583	0.0116429	1
ENSG00000111087	387	396	332	230	223	250	286.714	327.738	333.182	257.355	241.367	275.626	144.077	164.693	167.428	129.324	121.29	138.506	3.97471	4.50065	4.61999	3.57352	3.3313	3.76947	12	57459785	57472268	1990	GLI1	protein_coding	GLI family zinc finger 1	regulation of transcription by RNA polymerase II; cell differentiation; positive regulation of DNA-templated transcription; positive regulation of transcription by RNA polymerase II; positive regulation of cell population proliferation; negative regulation of canonical Wnt signaling pathway; smoothened signaling pathway; positive regulation of smoothened signaling pathway; positive regulation of …	RNA polymerase II transcription regulatory region sequence-specific DNA binding; metal ion binding; DNA binding; sequence-specific DNA binding; protein binding; RNA polymerase II cis-regulatory region sequence-specific DNA binding; DNA-binding transcription factor activity, RNA polymerase II-specific; transcription cis-regulatory region binding; chromatin binding; DNA-binding transcription activa…	nucleus; cytoplasm; nucleoplasm; cytosol; ciliary tip; cilium; axoneme; ciliary base; GLI-SUFU complex	-2.29581e-05	-0.288466	0.0116945	1
ENSG00000125844	18378	15705	13483	12707	13301	12459	13615.6	12997.8	13531	14218.3	14396.5	13736.1	5812.42	5548.69	5776.31	6069.7	6145.78	5863.87	160.349	151.632	159.391	167.72	168.798	159.587	20	17613678	17682295	2342.5	RRBP1	protein_coding	ribosome binding protein 1	protein transport; translation; osteoblast differentiation	RNA binding; signaling receptor activity	endoplasmic reticulum; endoplasmic reticulum membrane; membrane; ribosome	0.000405386	0.0772285	0.0117669	1
ENSG00000125462	17	14	15	5	1	4	12.5947	11.5867	15.0534	5.59467	1.08236	4.41002	15.9426	14.6667	19.055	7.08185	1.37008	5.5823	0.439814	0.400806	0.525799	0.195688	0.0376301	0.151924	1	156404250	156456763	790	MIR9-1HG	lncRNA	MIR9-1 host gene				-3.79033e-06	-1.82518	0.011875	1
ENSG00000177469	25697	21994	19133	17513	18436	17915	19038	18202.7	19201.1	19595.9	19954.4	19751.4	5332.76	5098.8	5378.47	5489.04	5589.47	5532.6	147.116	139.338	148.413	151.675	153.519	150.571	17	42402449	42423256	3570	CAVIN1	protein_coding	caveolae associated protein 1	DNA-templated transcription termination; positive regulation of cell motility; rRNA transcription; termination of RNA polymerase I transcription; transcription initiation at RNA polymerase I promoter; protein secretion	RNA binding; protein binding; rRNA binding; identical protein binding; rRNA primary transcript binding	nucleus; cytoplasm; membrane; intracellular membrane-bounded organelle; endoplasmic reticulum; plasma membrane; mitochondrion; caveola; cytosol; membrane raft; nucleoplasm; protein-containing complex	9.23418e-05	0.0714344	0.0119338	1
ENSG00000162927	351	293	295	205	183	193	260.043	242.493	296.05	229.381	198.072	212.783	170.688	159.168	194.323	150.562	130.011	139.667	4.70882	4.34969	5.36211	4.16038	3.57085	3.80109	2	60940222	61018259	1523.5	PUS10	protein_coding	pseudouridine synthase 10	pseudouridine synthesis; RNA modification; tRNA processing; tRNA pseudouridine synthesis; primary miRNA processing	RNA binding; pseudouridine synthase activity; metal ion binding; isomerase activity; protein binding; tRNA pseudouridine synthase activity; primary miRNA binding	nucleus; cytoplasm; mitochondrion	-1.86844e-05	-0.315672	0.0119852	1
ENSG00000032444	4621	4599	3833	3645	3486	4012	3423.53	3806.23	3846.65	4078.51	3773.11	4423.25	5117.38	5689.44	5749.85	6096.43	5639.93	6611.73	141.175	155.479	158.66	168.459	154.904	179.94	19	7534004	7561764	669	PNPLA6	protein_coding	patatin like phospholipase domain containing 6	lipid metabolic process; phosphatidylcholine metabolic process; lipid catabolic process; glycerophospholipid catabolic process	lysophospholipase activity; hydrolase activity; phosphatidyl phospholipase B activity; catalytic activity	cellular anatomical entity; membrane; endoplasmic reticulum; endoplasmic reticulum membrane; cytosol	4.88416e-05	0.148857	0.0120279	1
ENSG00000173402	14056	13145	10825	10043	11033	10115	10413.6	10879.1	10863.5	11237.4	11941.7	11151.8	3026.32	3161.61	3157.09	3265.75	3470.41	3240.87	83.488	86.3992	87.1162	90.2404	95.3173	88.2012	3	49468713	49535618	3441	DAG1	protein_coding	dystroglycan 1	viral entry into host cell; regulation of epithelial to mesenchymal transition; membrane protein ectodomain proteolysis; negative regulation of protein kinase B signaling; axon guidance; negative regulation of cell migration; negative regulation of MAPK cascade; regulation of gastrulation; microtubule anchoring; positive regulation of basement membrane assembly involved in embryonic body morphoge…	calcium ion binding; actin binding; protein binding; SH2 domain binding; tubulin binding; structural constituent of muscle; vinculin binding; virus receptor activity; laminin-1 binding; laminin binding; alpha-actinin binding; dystroglycan binding; protein-containing complex binding	membrane; dystrophin-associated glycoprotein complex; nucleus; cytoplasm; extracellular region; intracellular membrane-bounded organelle; nucleoplasm; plasma membrane; cytoskeleton; focal adhesion; synapse; extracellular space; postsynaptic membrane; basement membrane; lamellipodium; sarcolemma; filopodium; cytosol; extracellular exosome; collagen-containing extracellular matrix; endoplasmic reti…	6.92998e-05	0.094675	0.0121082	1
ENSG00000274667	14	13	8	1	3	2	10.3721	10.7591	8.02849	1.11893	3.24708	2.20501	15.2531	15.8222	11.8066	1.64549	4.77512	3.24266	0.420791	0.432382	0.325789	0.0454688	0.131152	0.0882499	15	56729932	56730611	680		lncRNA	novel transcript, sense intronic to				-3.36664e-06	-2.14993	0.0121744	1
ENSG00000233198	3	11	3	1	0	0	2.22259	9.10384	3.01068	1.11893	0	0	1.41656	5.80232	1.91885	0.71315	0	0	0.0390792	0.158564	0.0529486	0.019706	0	0	9	137227502	137229640	1569	RNF224	protein_coding	ring finger protein 224		metal ion binding		-2.3207e-06	-3.60092	0.0122281	1
ENSG00000128000	1002	873	771	606	625	559	742.345	722.514	773.745	678.073	676.476	616.3	1458.44	1419.48	1520.13	1332.17	1329.03	1210.81	40.2344	38.7909	41.9462	36.8109	36.5027	32.9524	19	40028260	40056231	509	ZNF780B	protein_coding	zinc finger protein 780B	regulation of DNA-templated transcription; positive regulation of transcription by RNA polymerase II; regulation of transcription by RNA polymerase II	metal ion binding; DNA binding; RNA polymerase II cis-regulatory region sequence-specific DNA binding; DNA-binding transcription activator activity, RNA polymerase II-specific	nucleus	-3.70925e-05	-0.182564	0.0124391	1
ENSG00000272669	25	22	12	29	24	36	18.5216	18.2077	12.0427	32.4491	25.9767	39.6902	37.7222	37.0828	24.5269	66.0877	52.9056	80.8354	1.04065	1.01339	0.676793	1.82616	1.45309	2.19996	22	38742625	38743115	491		lncRNA	novel transcript, antisense to SUN2				6.65003e-06	0.994762	0.0128632	1
ENSG00000183963	4949	4120	3383	3474	3667	3173	3666.53	3409.8	3395.05	3887.17	3969.02	3498.25	3515.37	3269.22	3255.08	3726.92	3805.39	3354.02	96.9796	89.3401	89.8201	102.983	104.518	91.2807	22	31064105	31104757	1043	SMTN	protein_coding	smoothelin	actin cytoskeleton organization; muscle organ development; smooth muscle contraction	protein binding; actin binding; structural constituent of muscle	cytoplasm; cytoskeleton; microtubule organizing center; filamentous actin; actin cytoskeleton	5.77735e-05	0.11603	0.0129435	1
ENSG00000168994	3024	2619	2070	2182	2109	2111	2240.37	2167.54	2077.37	2441.51	2282.7	2327.39	1385.08	1340.06	1284.31	1509.44	1411.25	1438.88	38.2107	36.6205	35.439	41.7093	38.761	39.1595	6	3722614	3751713	1617.5	PXDC1	protein_coding	PX domain containing 1		phosphatidylinositol binding		8.15175e-05	0.119283	0.0131334	1
ENSG00000099625	304	260	217	249	251	224	225.222	215.182	217.773	278.614	271.673	246.961	91.8151	87.7218	88.7781	113.581	110.751	100.677	2.53293	2.39723	2.44973	3.13851	3.04186	2.73996	19	1228287	1238027	2453	CBARP	protein_coding	CACN subunit beta associated regulatory protein	negative regulation of voltage-gated calcium channel activity; negative regulation of calcium ion-dependent exocytosis; negative regulation of calcium ion transmembrane transport	transmembrane transporter binding; protein binding	membrane; cell projection; cytoplasmic vesicle; plasma membrane; synapse; synaptic vesicle membrane; growth cone; secretory granule	3.17425e-05	0.275569	0.0134379	1
ENSG00000104915	1649	1506	1224	1197	1257	1241	1221.68	1246.4	1228.36	1339.36	1360.53	1368.21	1138.57	1161.6	1144.79	1248.24	1267.97	1275.12	31.41	31.7438	31.5891	34.4918	34.8256	34.7029	19	13144058	13150383	1073	STX10	protein_coding	syntaxin 10	vesicle-mediated transport; Golgi vesicle transport; intracellular protein transport; protein transport; retrograde transport, endosome to Golgi; regulation of protein localization; vesicle fusion; vesicle docking; membrane fusion	SNAP receptor activity; protein binding; SNARE binding; syntaxin binding	membrane; Golgi apparatus; Golgi membrane; organelle membrane; trans-Golgi network; perinuclear region of cytoplasm; cytosol; vesicle; endomembrane system; trans-Golgi network membrane; SNARE complex	4.59583e-05	0.138305	0.0134693	1
ENSG00000110651	22479	20646	16325	15696	16379	15730	16653.9	17087.1	16383.1	17562.8	17728	17342.4	18545.5	19027.9	18244	19557.7	19741.6	19312.2	511.62	519.988	503.423	540.424	542.218	525.588	11	2376177	2397802	898	CD81	protein_coding	CD81 molecule	immune system process; adaptive immune response; viral entry into host cell; positive regulation of inflammatory response to antigenic stimulus; myoblast fusion involved in skeletal muscle regeneration; receptor internalization; macrophage fusion; positive regulation of B cell receptor signaling pathway; positive regulation of B cell activation; cellular response to low-density lipoprotein partic…	protein binding; lipid binding; integrin binding; virus receptor activity; cholesterol binding; MHC class II protein complex binding; MHC class II protein binding; transferrin receptor binding	membrane; plasma membrane; focal adhesion; basolateral plasma membrane; vesicle; extracellular exosome; tetraspanin-enriched microdomain; immunological synapse; basal plasma membrane	0.000177246	0.0703239	0.0136514	1
ENSG00000171621	1665	1599	1322	1278	1278	1337	1233.54	1323.37	1326.71	1430	1383.26	1474.05	1008.62	1082.07	1084.8	1169.25	1131.04	1205.27	27.825	29.5703	29.9337	32.3092	31.0647	32.8018	1	9292894	9369532	1223	SPSB1	protein_coding	splA/ryanodine receptor domain and SOCS box containing 1	protein ubiquitination; ubiquitin-dependent protein catabolic process; proteasome-mediated ubiquitin-dependent protein catabolic process	protein binding; ubiquitin ligase-substrate adaptor activity	cytoplasm; cytosol; SCF ubiquitin ligase complex	4.86547e-05	0.143897	0.0137286	1
ENSG00000179820	2470	2256	1912	1798	1942	1783	1829.93	1867.11	1918.81	2011.84	2101.95	1965.77	2170.74	2214.85	2276.17	2386.53	2493.41	2331.87	59.8848	60.5264	62.8082	65.9453	68.4832	63.4625	19	53864763	53876435	843	MYADM	protein_coding	myeloid associated differentiation marker	negative regulation of gene expression; positive regulation of cell migration; negative regulation of protein phosphorylation; establishment of endothelial barrier; membrane raft organization; negative regulation of actin filament polymerization; positive regulation of substrate adhesion-dependent cell spreading; negative regulation of protein kinase C signaling; protein localization to plasma me…	protein binding	membrane; plasma membrane; membrane raft; ruffle; cortical actin cytoskeleton; cell-cell junction	5.02039e-05	0.115629	0.0138232	1
ENSG00000101190	1141	1010	823	827	913	814	845.325	835.898	825.931	925.358	988.196	897.439	332.936	329.223	325.298	364.458	389.207	353.462	9.18481	8.99689	8.97621	10.0708	10.6898	9.61956	20	62841005	62861822	2539	TCFL5	protein_coding	transcription factor like 5	regulation of DNA-templated transcription; spermatogenesis; cell differentiation; negative regulation of transcription by RNA polymerase II; regulation of cell population proliferation; transcription by RNA polymerase II; regulation of cell differentiation	DNA-binding transcription factor activity; protein dimerization activity; DNA binding; RNA polymerase II cis-regulatory region sequence-specific DNA binding; DNA-binding transcription factor activity, RNA polymerase II-specific; DNA-binding transcription repressor activity, RNA polymerase II-specific; sequence-specific double-stranded DNA binding	nucleus; chromatin; male germ cell nucleus	3.75799e-05	0.164681	0.0138394	1
ENSG00000162783	9833	8794	7068	6591	7172	7033	7284.91	7278.1	7093.17	7374.89	7762.7	7753.92	1734.09	1732.47	1688.45	1755.51	1847.82	1845.73	47.8388	47.3443	46.5907	48.5088	50.7517	50.2321	1	181088700	181092900	4201	IER5	protein_coding	immediate early response 5	positive regulation of transcription by RNA polymerase II; regulation of cell population proliferation; cellular response to heat; positive regulation of cellular response to heat	identical protein binding; protein binding	nucleus; cytoplasm; nucleoplasm; nucleolus; protein phosphatase type 2A complex	8.745e-05	0.0797653	0.0138404	1
ENSG00000067064	8082	7340	5875	4878	5213	5271	5987.66	6074.74	5895.92	5458.16	5642.35	5811.3	3352.55	3401.31	3301.19	3056.08	3159.21	3253.81	92.4878	92.9497	91.0924	84.4466	86.7699	88.5533	10	1039152	1049119	1786	IDI1	protein_coding	isopentenyl-diphosphate delta isomerase 1	isoprenoid biosynthetic process; lipid metabolic process; steroid biosynthetic process; cholesterol biosynthetic process; steroid metabolic process; cholesterol metabolic process; sterol biosynthetic process; isopentenyl diphosphate biosynthetic process; dimethylallyl diphosphate biosynthetic process	isopentenyl-diphosphate delta-isomerase activity; metal ion binding; isomerase activity; manganese ion binding; magnesium ion binding; protein binding	peroxisome; cytoplasm; cytosol	-2.53275e-05	-0.0868131	0.0138619	1
ENSG00000104635	5772	5656	4333	4241	4135	4772	4276.26	4681.03	4348.43	4745.39	4475.56	5261.15	6035.66	6606.96	6137.52	6697.81	6316.96	7425.76	166.507	180.552	169.358	185.076	173.5	202.094	8	22367278	22434129	708.5	SLC39A14	protein_coding	solute carrier family 39 member 14	transmembrane transport; metal ion transport; monoatomic ion transport; gluconeogenesis; inorganic cation transmembrane transport; bicarbonate transport; monoatomic anion transmembrane transport; zinc ion transport; iron ion transmembrane transport; zinc ion transmembrane transport; insulin receptor signaling pathway; cellular response to insulin stimulus; chondrocyte differentiation; cellular re…	metal ion transmembrane transporter activity; iron ion transmembrane transporter activity; zinc ion transmembrane transporter activity; manganese ion transmembrane transporter activity; cadmium ion transmembrane transporter activity; solute:bicarbonate symporter activity; monoatomic anion:monoatomic cation symporter activity; protein binding; ferrous iron transmembrane transporter activity	membrane; plasma membrane; endosome; lysosome; lysosomal membrane; late endosome membrane; apical plasma membrane; basolateral plasma membrane; early endosome membrane	2.0231e-06	0.122145	0.0138755	1
ENSG00000116337	4095	4398	3588	3354	3255	3735	3033.84	3639.88	3600.78	3752.9	3523.09	4117.86	893.487	1071.97	1060.46	1105.26	1037.58	1212.74	24.6489	29.2944	29.262	30.5409	28.4977	33.005	1	109616104	109632051	3395.5	AMPD2	protein_coding	adenosine monophosphate deaminase 2	IMP salvage; purine ribonucleoside monophosphate biosynthetic process; nucleotide metabolic process; IMP biosynthetic process; AMP metabolic process; energy homeostasis; cyclic purine nucleotide metabolic process	deaminase activity; AMP deaminase activity; metal ion binding; hydrolase activity; protein binding; identical protein binding	cytosol	0.000637207	0.150126	0.0140554	1
ENSG00000253210	159	133	121	94	62	71	117.797	110.074	121.431	105.18	67.1064	78.2778	151.801	141.848	156.483	135.541	86.4773	100.873	4.18777	3.87635	4.31797	3.74531	2.37516	2.7453	8	141124678	141130070	776	DENND3-AS1	lncRNA	DENND3 antisense RNA 1				-1.33769e-05	-0.479812	0.0142142	1
ENSG00000115419	10292	9760	7817	7348	7385	8139	7624.97	8077.59	7844.84	8221.92	7993.24	8973.29	9315.78	9868.77	9584.41	10045.1	9765.72	10963.1	256.997	269.69	264.47	277.57	268.222	298.364	2	190880821	190965552	818.5	GLS	protein_coding	glutaminase	glutamine metabolic process; protein homotetramerization; glutamate biosynthetic process; glutamine catabolic process; cellular glutamate homeostasis; suckling behavior; regulation of respiratory gaseous exchange by nervous system process; chemical synaptic transmission	glutaminase activity; hydrolase activity; protein binding	cytoplasm; mitochondrion; mitochondrial matrix; cytosol; synapse	8.09664e-05	0.0972955	0.0142412	1
ENSG00000102144	43666	38951	31923	27072	28185	28752	32350.5	32236.7	32036.7	30291.8	30506.4	31699.2	38929.7	38792.6	38552	36452.2	36710.4	38145.9	1073.96	1060.11	1063.8	1007.26	1008.28	1038.15	X	77910739	78129295	831	PGK1	protein_coding	phosphoglycerate kinase 1	glycolytic process; phosphorylation; epithelial cell differentiation; gluconeogenesis; negative regulation of angiogenesis; plasminogen activation; canonical glycolysis; cellular response to hypoxia	phosphoglycerate kinase activity; nucleotide binding; ATP binding; kinase activity; transferase activity; protein binding; ADP binding; protein-disulfide reductase (NAD(P)) activity	cytoplasm; membrane; membrane raft; cytosol; extracellular exosome; extracellular space	-0.000118252	-0.0630078	0.0143803	1
ENSG00000182087	8317	7764	6115	5994	6109	5990	6161.76	6425.65	6136.77	6706.88	6612.15	6604	3506.98	3657.17	3492.76	3817.24	3763.32	3758.68	96.748	99.9418	96.3786	105.479	103.362	102.294	19	1009648	1021179	1757	TMEM259	protein_coding	transmembrane protein 259	response to endoplasmic reticulum stress; positive regulation of ERAD pathway		membrane; endoplasmic reticulum; endoplasmic reticulum membrane	9.93568e-06	0.0893726	0.0144427	1
ENSG00000285219	106	104	97	45	60	57	78.5315	86.0727	97.3454	50.352	64.9417	62.8428	52.7057	57.7669	65.3325	33.7933	43.585	42.1764	1.45401	1.57863	1.80277	0.933788	1.19709	1.14784	6	8435568	9294133	1490	HULC	lncRNA	hepatocellular carcinoma up-regulated long non-coding RNA	regulation of gene expression		ribosome	-1.13923e-05	-0.550537	0.0145269	1
ENSG00000183978	1997	1834	1421	1156	1234	1274	1479.5	1517.86	1426.06	1293.49	1335.63	1404.59	1373.73	1409.34	1324.1	1201.01	1240.14	1304.17	37.8974	38.5139	36.5371	33.1867	34.0614	35.4934	17	42795147	42798704	1077	COA3	protein_coding	cytochrome c oxidase assembly factor 3	mitochondrial cytochrome c oxidase assembly; positive regulation of mitochondrial translation	protein binding	membrane; mitochondrion; mitochondrial inner membrane	-5.42449e-05	-0.133913	0.014552	1
ENSG00000141905	10232	8986	7832	7378	7916	6997	7580.52	7437.01	7859.89	8255.49	8567.97	7714.23	4865.54	4773.43	5044.86	5298.77	5499.34	4951.36	134.227	130.447	139.207	146.418	151.043	134.753	19	3314403	3469217	1558	NFIC	protein_coding	nuclear factor I C	regulation of DNA-templated transcription; positive regulation of DNA-templated transcription; DNA replication; negative regulation of transcription by RNA polymerase II; positive regulation of transcription by RNA polymerase II; regulation of transcription by RNA polymerase II; transcription by RNA polymerase II; negative regulation of DNA-templated transcription	DNA-binding transcription factor activity; DNA binding; protein binding; RNA polymerase II cis-regulatory region sequence-specific DNA binding; DNA-binding transcription factor activity, RNA polymerase II-specific; sequence-specific double-stranded DNA binding; DNA-binding transcription activator activity, RNA polymerase II-specific; cis-regulatory region sequence-specific DNA binding; double-str…	nucleus; nucleoplasm; fibrillar center; chromatin	9.74951e-05	0.101413	0.0146031	1
ENSG00000135046	16986	14532	11657	10071	10585	10523	12584.3	12027	11698.5	11268.8	11456.8	11601.7	14761.7	14107.9	13722.6	13218.5	13439.1	13609	407.234	385.536	378.659	365.258	369.113	370.372	9	73151865	73170393	852.5	ANXA1	protein_coding	annexin A1	negative regulation of apoptotic process; signal transduction; actin cytoskeleton organization; immune system process; innate immune response; adaptive immune response; inflammatory response; cell surface receptor signaling pathway; phagocytosis; positive regulation of T cell proliferation; regulation of cell shape; cell-cell adhesion; localization; positive regulation of cell migration involved …	calcium ion binding; calcium-dependent phospholipid binding; phospholipase inhibitor activity; metal ion binding; protein binding; phospholipase A2 inhibitor activity; calcium-dependent protein binding; cadherin binding involved in cell-cell adhesion; signaling receptor binding; phospholipid binding; lipid binding	cytoplasm; nucleus; extracellular region; membrane; cell projection; cytoplasmic vesicle membrane; cytoplasmic vesicle; nucleoplasm; cytosol; plasma membrane; cilium; motile cilium; endosome; focal adhesion; endosome membrane; extracellular space; apical plasma membrane; basolateral plasma membrane; lateral plasma membrane; early endosome; early endosome membrane; membrane-bounded organelle; vesi…	-0.000110649	-0.0814603	0.0146527	1
ENSG00000256448	7	6	6	1	0	0	5.18604	4.96573	6.02137	1.11893	0	0	16.7562	16.0444	19.4551	3.61529	0	0	0.462258	0.438454	0.536842	0.0998991	0	0	11	73405297	73410682	309.5		lncRNA	novel transcript				-1.86604e-06	-3.76982	0.0148142	1
ENSG00000051128	1715	1636	1247	1226	1283	1373	1270.58	1353.99	1251.44	1371.81	1388.67	1513.74	1348.1	1436.59	1327.79	1455.5	1473.39	1606.09	37.1903	39.2587	36.6388	40.219	40.4676	43.7102	19	18929201	18941261	942.5	HOMER3	protein_coding	homer scaffold protein 3	G protein-coupled glutamate receptor signaling pathway; protein targeting; negative regulation of interleukin-2 production; negative regulation of calcineurin-NFAT signaling cascade; regulation of store-operated calcium entry	G protein-coupled glutamate receptor binding; protein binding; identical protein binding; protein domain specific binding	cytoplasm; synapse; postsynaptic density; plasma membrane; cytosol; dendrite; basal part of cell; glutamatergic synapse	0.000151466	0.140503	0.0153263	1
ENSG00000221990	290	236	214	146	171	137	214.85	195.319	214.762	163.364	185.084	151.043	129.194	117.45	129.141	98.2346	111.295	90.8257	3.56412	3.20962	3.5635	2.71445	3.0568	2.47185	5	441498	443160	1663	EXOC3-AS1	lncRNA	EXOC3 antisense RNA 1				-1.90041e-05	-0.322248	0.0154433	1
ENSG00000171469	2373	2154	1679	1452	1391	1499	1758.07	1782.7	1684.98	1624.69	1505.56	1652.65	3025.94	3068.33	2900.14	2796.37	2591.33	2844.5	83.4774	83.85	80.0259	77.2703	71.1727	77.4139	19	9604680	9621236	581	ZNF561	protein_coding	zinc finger protein 561	regulation of DNA-templated transcription; regulation of transcription by RNA polymerase II	metal ion binding; DNA binding; RNA polymerase II cis-regulatory region sequence-specific DNA binding; DNA-binding transcription factor activity, RNA polymerase II-specific	nucleus	-4.57708e-05	-0.128859	0.015462	1
ENSG00000253948	144	110	101	59	70	64	106.684	91.0384	101.36	66.017	75.7653	70.5603	79.1133	67.5109	75.1647	48.9559	56.1849	52.325	2.18252	1.84491	2.07408	1.35277	1.54316	1.42404	8	98957568	99013743	1348.5	VPS13B-DT	lncRNA	VPS13B divergent transcript				-1.10007e-05	-0.494292	0.0155123	1
ENSG00000166797	3235	2986	2430	1972	2010	2130	2396.69	2471.28	2438.65	2206.54	2175.55	2348.34	3278.65	3380.68	3336.05	3018.52	2976.12	3212.5	90.4491	92.386	92.0544	83.4087	81.7413	87.429	15	64072565	64093857	731	CIAO2A	protein_coding	cytosolic iron-sulfur assembly component 2A	protein maturation by [4Fe-4S] cluster transfer; chromosome segregation; iron-sulfur cluster assembly; protein maturation by iron-sulfur cluster transfer	metal ion binding; protein binding	cytoplasm; nucleoplasm; cytosol; CIA complex	-8.96525e-05	-0.118353	0.0155655	1
ENSG00000110047	3222	2813	2272	2223	2483	2184	2387.06	2328.1	2280.09	2487.39	2687.5	2407.87	2351.79	2293.69	2246.39	2450.63	2647.79	2372.29	64.8794	62.6812	61.9866	67.7166	72.7233	64.5624	11	64851642	64888296	1015	EHD1	protein_coding	EH domain containing 1	intracellular protein transport; protein transport; cell projection organization; endocytosis; cilium assembly; protein localization to cilium; endocytic recycling; protein homooligomerization; positive regulation of cholesterol storage; positive regulation of neuron projection development; endosomal transport; neuron projection development; low-density lipoprotein particle clearance; cholesterol…	protein binding; GTP binding; calcium ion binding; metal ion binding; nucleotide binding; ATP binding; identical protein binding; small GTPase binding; cadherin binding	membrane; cell projection; plasma membrane; cilium; endosome; endosome membrane; recycling endosome membrane; early endosome membrane; cytoplasm; ciliary membrane; extracellular exosome; early endosome; lipid droplet; endocytic vesicle; platelet dense tubular network membrane; perinuclear region of cytoplasm; ciliary pocket membrane	8.86662e-05	0.115769	0.0157184	1
ENSG00000099385	2467	2121	1698	1701	1803	1720	1827.71	1755.39	1704.05	1903.31	1951.5	1896.31	1515.51	1455.54	1412.97	1578.2	1618.16	1572.39	41.8089	39.7765	38.9894	43.6093	44.4438	42.7932	16	30833626	30894302	1206	BCL7C	protein_coding	BAF chromatin remodeling complex subunit BCL7C	apoptotic process; chromatin remodeling; regulation of transcription by RNA polymerase II; regulation of mitotic metaphase/anaphase transition; regulation of G0 to G1 transition; positive regulation of stem cell population maintenance; regulation of G1/S transition of mitotic cell cycle; positive regulation of double-strand break repair; regulation of nucleotide-excision repair; positive regulati…		SWI/SNF complex; chromatin; GBAF complex	4.99898e-05	0.120011	0.015758	1
ENSG00000129757	591	554	476	491	514	442	437.85	458.502	477.695	549.396	556.334	487.307	367.016	384.327	400.415	460.516	466.332	408.472	10.125	10.5027	11.049	12.7252	12.8081	11.1167	11	2883213	2885775	1193	CDKN1C	protein_coding	cyclin dependent kinase inhibitor 1C	regulation of cell cycle; regulation of macromolecule metabolic process; cell cycle; positive regulation of DNA-templated transcription; regulation of nitrogen compound metabolic process; regulation of primary metabolic process; negative regulation of DNA-templated transcription; positive regulation of transforming growth factor beta receptor signaling pathway; negative regulation of mitotic cell…	cyclin-dependent protein serine/threonine kinase inhibitor activity; protein binding; protein kinase inhibitor activity; molecular function inhibitor activity; protein-containing complex binding	nucleus; cytoplasm	2.91949e-05	0.215501	0.0159551	1
ENSG00000185359	6803	6137	5123	4808	4935	4909	5040.09	5079.11	5141.24	5379.83	5341.45	5412.2	12292.9	12388.1	12539.6	13121.5	13027.9	13200.5	339.128	338.537	346.016	362.579	357.821	359.255	17	81683326	81703138	410	HGS	protein_coding	hepatocyte growth factor-regulated tyrosine kinase substrate	protein transport; phosphorylation; positive regulation of gene expression; protein localization to membrane; macroautophagy; multivesicular body assembly; protein transport to vacuole involved in ubiquitin-dependent protein catabolic process via the multivesicular body sorting pathway; membrane fission; endocytic recycling; endosomal transport; signal transduction; protein targeting to lysosome;…	metal ion binding; phosphatidylinositol binding; ubiquitin binding; protein domain specific binding; kinase activity; protein binding; ubiquitin-like protein ligase binding	cytoplasm; membrane; cytosol; endosome; multivesicular body membrane; early endosome membrane; lysosome; extracellular exosome; early endosome; ESCRT-0 complex; phagocytic vesicle lumen	3.51648e-05	0.0805627	0.0160501	1
ENSG00000276045	923	861	709	746	693	706	683.817	712.582	711.525	834.724	750.076	778.368	376.344	392.175	391.593	459.397	412.81	428.381	10.3823	10.7172	10.8056	12.6942	11.3381	11.6585	12	121626509	121643218	1817	ORAI1	protein_coding	ORAI calcium release-activated calcium modulator 1	monoatomic ion transport; immune system process; adaptive immune response; calcium ion transport; monoatomic ion transmembrane transport; calcium ion transmembrane transport; store-operated calcium entry; phospholipase C-activating G protein-coupled receptor signaling pathway; positive regulation of insulin secretion; mammary gland epithelium development; calcium ion import; ion channel modulatin…	protein binding; calcium channel activity; store-operated calcium channel activity; identical protein binding; calmodulin binding	membrane; plasma membrane; membrane raft; basolateral plasma membrane; protein-containing complex; plasma membrane raft; calcium channel complex	4.27935e-05	0.165507	0.0160582	1
ENSG00000108557	2533	2299	1868	1794	1913	1829	1876.61	1902.7	1874.65	2007.37	2070.56	2016.48	1533.18	1554.5	1531.58	1640	1691.63	1647.45	42.2962	42.4806	42.2621	45.3172	46.4618	44.8359	17	17681458	17811453	1224	RAI1	protein_coding	retinoic acid induced 1	positive regulation of DNA-templated transcription; rhythmic process; circadian regulation of gene expression; regulation of transcription by RNA polymerase II; skeletal system development; negative regulation of multicellular organism growth	metal ion binding; protein binding	nucleus; cytoplasm; nucleoplasm	5.10717e-05	0.108225	0.0160688	1
ENSG00000103495	5309	4927	4073	3903	4009	3777	3933.24	4077.69	4087.5	4367.2	4339.19	4164.16	2703.26	2802.54	2809.28	3001.51	2982.26	2861.97	74.5756	76.5867	77.5188	82.9388	81.9098	77.8892	16	29806106	29811164	1455	MAZ	protein_coding	MYC associated zinc finger protein	negative regulation of transcription by RNA polymerase II; transcription initiation at RNA polymerase II promoter; regulation of transcription by RNA polymerase II; positive regulation of gene expression; positive regulation of cell population proliferation; positive regulation of cell migration; positive regulation of protein kinase B signaling; termination of RNA polymerase II transcription; ne…	RNA binding; metal ion binding; DNA binding; protein binding; RNA polymerase II cis-regulatory region sequence-specific DNA binding; DNA-binding transcription factor activity, RNA polymerase II-specific	nucleus	5.03843e-05	0.0897963	0.0161356	1
ENSG00000125912	4627	4107	3307	3170	3411	3287	3427.98	3399.04	3318.78	3547.02	3691.93	3623.93	2993.86	2968.6	2898.49	3097.83	3224.4	3165.01	82.5926	81.1246	79.9806	85.6004	88.5603	86.1366	19	3185563	3209575	1145	NCLN	protein_coding	nicalin	regulation of signal transduction; protein stabilization; regulation of protein-containing complex assembly; regulation of protein complex stability; determination of left/right asymmetry in lateral mesoderm; multi-pass transmembrane protein insertion into ER membrane; negative regulation of nodal signaling pathway	protein binding; ribosome binding	membrane; endoplasmic reticulum; protein-containing complex; endoplasmic reticulum membrane; multi-pass translocon complex	6.33463e-05	0.0980702	0.0161842	1
ENSG00000180730	650	543	330	441	470	444	481.561	449.399	331.175	493.449	508.71	489.512	125.243	116.879	86.1314	128.335	132.304	127.311	3.45513	3.19402	2.37669	3.54621	3.63383	3.46481	13	26044597	26052016	3845	SHISA2	protein_coding	shisa family member 2	negative regulation of Wnt signaling pathway; negative regulation of fibroblast growth factor receptor signaling pathway	protein binding	membrane; endoplasmic reticulum; endoplasmic reticulum membrane	2.71144e-05	0.232808	0.0162766	1
ENSG00000157933	3351	2817	2490	2406	2489	2291	2482.63	2331.41	2498.87	2692.15	2694	2525.84	5541.59	5204.04	5577.83	6009.27	6013.39	5638.03	152.877	142.214	153.914	166.05	165.162	153.441	1	2227388	2310213	448	SKI	protein_coding	SKI proto-oncogene	negative regulation of transcription by RNA polymerase II; negative regulation of cell population proliferation; negative regulation of BMP signaling pathway; positive regulation of transcription by RNA polymerase II; neural tube closure; positive regulation of Wnt signaling pathway; myelination in peripheral nervous system; negative regulation of transforming growth factor beta receptor signalin…	SMAD binding; zinc ion binding; identical protein binding; protein binding; RNA polymerase II cis-regulatory region sequence-specific DNA binding; DNA-binding transcription factor activity, RNA polymerase II-specific; protein domain specific binding; ubiquitin protein ligase binding; protein kinase binding; DNA-binding transcription repressor activity, RNA polymerase II-specific; DNA-binding tran…	cytoplasm; nucleus; cellular anatomical entity; nucleoplasm; nuclear body; PML body; protein-containing complex; transcription regulator complex; centrosome; transcription repressor complex	5.09139e-05	0.113931	0.0163316	1
ENSG00000187908	1092	954	716	794	816	756	809.023	789.551	718.55	888.433	883.207	833.494	139.439	136.083	123.845	153.125	152.225	143.656	3.84673	3.71881	3.41736	4.23121	4.18095	3.90965	10	122560665	122643736	5802	DMBT1	protein_coding	deleted in malignant brain tumors 1	protein transport; cell differentiation; innate immune response; defense response to virus; defense response to Gram-positive bacterium; endocytosis; defense response to Gram-negative bacterium; defense response; epithelial cell differentiation; induction of bacterial agglutination	scavenger receptor activity; protein binding; calcium-dependent protein binding; pattern recognition receptor activity; zymogen binding	membrane; cytoplasm; extracellular region; cellular anatomical entity; extracellular space; phagocytic vesicle membrane; extracellular matrix; extracellular exosome; zymogen granule membrane	3.61204e-05	0.166059	0.0163874	1
ENSG00000246982	17	15	16	35	15	26	12.5947	12.4143	16.057	39.1627	16.2354	28.6651	20.7149	20.4183	26.4095	64.4123	26.703	47.1466	0.571469	0.557983	0.728739	1.77986	0.733416	1.28311	6	36146698	36197205	608	BRPF3-AS1	lncRNA	BRPF3 antisense RNA 1				5.71232e-06	1.04013	0.0164755	1
ENSG00000197961	697	604	539	505	544	558	516.382	499.883	540.919	565.061	588.805	615.198	73.9061	71.5448	77.418	80.8732	84.2714	88.0489	2.03887	1.95515	2.13626	2.23472	2.31457	2.39628	19	9560329	9584504	6987	ZNF121	protein_coding	zinc finger protein 121	regulation of transcription by RNA polymerase II	metal ion binding; DNA binding; protein binding; RNA polymerase II cis-regulatory region sequence-specific DNA binding; DNA-binding transcription factor activity, RNA polymerase II-specific	nucleus	-3.22685e-05	0.185807	0.0166744	1
ENSG00000123146	3374	2994	2615	2302	2637	2529	2499.67	2477.9	2624.31	2575.78	2854.19	2788.23	4366.24	4328.21	4583.95	4499.19	4985.48	4870.28	120.453	118.28	126.489	124.323	136.93	132.546	19	14380501	14408725	572.5	ADGRE5	protein_coding	adhesion G protein-coupled receptor E5	G protein-coupled receptor signaling pathway; cell surface receptor signaling pathway; signal transduction; cell adhesion; adenylate cyclase-activating G protein-coupled receptor signaling pathway; inflammatory response; immune response; cell-cell signaling	G protein-coupled receptor activity; calcium ion binding; transmembrane signaling receptor activity; protein binding	membrane; extracellular region; plasma membrane; focal adhesion; extracellular exosome; secretory granule membrane	6.4254e-05	0.113532	0.0167274	1
ENSG00000157021	37	37	21	13	11	12	27.4119	30.622	21.0748	14.5461	11.906	13.2301	30.7999	34.4067	23.6795	16.344	13.3775	14.8652	0.849687	0.940254	0.653409	0.451622	0.367422	0.404562	15	41163162	41164374	890	CIBAR1P1	unprocessed_pseudogene	CIBAR1 pseudogene 1				-6.02538e-06	-1.00287	0.0170067	1
ENSG00000122641	900	744	685	532	558	482	666.777	615.751	687.439	595.272	603.958	531.407	333.056	307.568	343.376	297.339	301.677	265.438	9.1881	8.40509	9.47507	8.21617	8.28577	7.22398	7	41667168	41705834	2002	INHBA	protein_coding	inhibin subunit beta A	positive regulation of gene expression; cell differentiation; regulation of transcription by RNA polymerase II; positive regulation of DNA-templated transcription; nervous system development; positive regulation of transcription by RNA polymerase II; defense response; cell surface receptor signaling pathway; negative regulation of cell population proliferation; erythrocyte differentiation; negati…	hormone activity; growth factor activity; identical protein binding; protein binding; signaling receptor binding; protein-containing complex binding; cytokine activity; peptide hormone binding; type II activin receptor binding	extracellular region; extracellular space; perinuclear region of cytoplasm; inhibin A complex; activin A complex	-0.000147057	-0.185623	0.017116	1
ENSG00000167994	251	213	202	192	199	242	185.957	176.283	202.719	214.835	215.39	266.806	124.678	118.192	135.916	144.04	144.412	178.884	3.43952	3.22991	3.75045	3.98016	3.96636	4.86839	11	61897301	61920269	1491.5	RAB3IL1	protein_coding	RAB3A interacting protein like 1	protein transport; exocytosis	guanyl-nucleotide exchange factor activity; protein binding; identical protein binding	cytosol; Golgi to plasma membrane transport vesicle	1.20375e-05	0.306055	0.0171201	1
ENSG00000168061	927	856	627	645	739	698	686.78	708.444	629.233	721.712	799.865	769.548	504.244	520.15	461.992	529.891	587.272	565.013	13.9107	14.2145	12.7481	14.6421	16.1298	15.377	11	65040901	65044828	1362	SAC3D1	protein_coding	SAC3 domain containing 1			protein-containing complex	3.33968e-05	0.176421	0.0171358	1
ENSG00000114867	30452	26445	22843	21124	22198	20843	22560.8	21886.5	22924.3	23636.3	24026.3	22979.5	10774	10452	10947.6	11287.7	11473.9	10974	297.226	285.628	302.087	311.904	315.137	298.66	3	184314495	184335358	2094	EIF4G1	protein_coding	eukaryotic translation initiation factor 4 gamma 1	translation; translational initiation; regulation of translation; negative regulation of autophagy; positive regulation of translation in response to endoplasmic reticulum stress; regulation of translational initiation; positive regulation of peptidyl-serine phosphorylation; positive regulation of protein localization to cell periphery; regulation of presynapse assembly; negative regulation of pe…	protein binding; RNA binding; translation initiation factor activity; eukaryotic initiation factor 4E binding; identical protein binding; mRNA binding; translation factor activity, RNA binding; ATP binding; translation initiation factor binding; molecular adaptor activity	nucleus; cytoplasm; membrane; cytosol; cytoplasmic stress granule; eukaryotic translation initiation factor 4F complex; polysome; postsynapse	8.63714e-05	0.0685168	0.017224	1
ENSG00000183137	1817	1651	1299	1097	1140	1095	1346.15	1366.4	1303.63	1227.47	1233.89	1207.24	1554.44	1577.83	1505.34	1417.4	1424.82	1394.04	42.8829	43.1184	41.5381	39.1661	39.1336	37.9393	6	109095110	109174418	866	CEP57L1	protein_coding	centrosomal protein 57 like 1		gamma-tubulin binding; identical protein binding; microtubule binding; protein binding	cytoplasm; cytoskeleton; microtubule; centrosome	-3.68954e-05	-0.131427	0.0172619	1
ENSG00000088756	1188	943	823	607	710	677	880.146	780.447	825.931	679.192	768.477	746.396	1241.39	1100.77	1164.92	957.958	1083.89	1052.74	34.2466	30.0815	32.1447	26.4706	29.7697	28.6507	18	6729716	6915716	709	ARHGAP28	protein_coding	Rho GTPase activating protein 28	signal transduction; regulation of small GTPase mediated signal transduction; regulation of actin filament polymerization; negative regulation of stress fiber assembly	GTPase activator activity	nucleoplasm; cell junction; cytoplasm; cytosol	-3.23271e-05	-0.181107	0.0176113	1
ENSG00000197381	5817	5498	4684	4531	4281	4384	4309.6	4550.26	4700.68	5069.89	4633.59	4833.38	1430.34	1510.21	1560.13	1682.67	1537.87	1604.18	39.4591	41.2704	43.05	46.4961	42.2385	43.6581	21	45073853	45226560	3013	ADARB1	protein_coding	adenosine deaminase RNA specific B1	RNA processing; mRNA processing; immune system process; innate immune response; defense response to virus; regulation of cell cycle; negative regulation of cell population proliferation; negative regulation of cell migration; positive regulation of viral genome replication; negative regulation of protein kinase activity by regulation of protein phosphorylation; adenosine to inosine editing; neuro…	RNA binding; adenosine deaminase activity; metal ion binding; hydrolase activity; protein binding; double-stranded RNA binding; mRNA binding; double-stranded RNA adenosine deaminase activity; tRNA-specific adenosine deaminase activity	nucleus; nucleoplasm; cytosol; nucleolus; synapse; cytoplasm	4.72517e-05	0.101088	0.017647	1
ENSG00000116329	77	76	52	57	91	74	57.0465	62.8992	52.1852	63.7792	98.4949	81.5853	6.12284	6.75102	5.60107	6.84546	10.5715	8.75661	0.168912	0.184489	0.154555	0.189156	0.290354	0.238314	1	28812170	28871267	9317	OPRD1	protein_coding	opioid receptor delta 1	G protein-coupled receptor signaling pathway; signal transduction; immune response; neuropeptide signaling pathway; negative regulation of gene expression; cellular response to toxic substance; phospholipase C-activating G protein-coupled receptor signaling pathway; negative regulation of protein-containing complex assembly; G protein-coupled receptor signaling pathway, coupled to cyclic nucleoti…	G protein-coupled receptor activity; G protein-coupled enkephalin receptor activity; G protein-coupled opioid receptor activity; protein binding; neuropeptide binding; receptor serine/threonine kinase binding	membrane; plasma membrane; neuron projection; synaptic vesicle membrane; vesicle; dendrite membrane; presynaptic membrane; axon terminus; postsynaptic membrane; spine apparatus; postsynaptic density membrane; neuronal dense core vesicle	1.29356e-05	0.500342	0.0177712	1
ENSG00000259828	87	78	76	33	49	40	64.4551	64.5545	76.2706	36.9248	53.0357	44.1002	16.1299	16.1548	19.0867	9.24044	13.2722	11.0361	0.44498	0.441472	0.526676	0.255335	0.36453	0.30035	6	141447011	141451006	3996		lncRNA	novel transcript				-9.63764e-06	-0.609204	0.017812	1
ENSG00000102554	885	876	665	627	756	721	655.664	724.997	667.368	701.571	818.265	794.906	666.325	736.785	678.22	712.979	831.57	807.831	18.3821	20.1346	18.7147	19.7013	22.8396	21.9854	13	73054976	73077541	984	KLF5	protein_coding	KLF transcription factor 5	regulation of transcription by RNA polymerase II; positive regulation of transcription by RNA polymerase II; positive regulation of miRNA transcription; negative regulation of transcription by RNA polymerase II; angiogenesis; regulation of gene expression; skeletal muscle satellite cell differentiation; satellite cell activation involved in skeletal muscle regeneration; myotube differentiation in…	metal ion binding; DNA binding; protein binding; RNA polymerase II cis-regulatory region sequence-specific DNA binding; DNA-binding transcription factor activity, RNA polymerase II-specific; sequence-specific double-stranded DNA binding; DNA-binding transcription activator activity, RNA polymerase II-specific; DNA-binding transcription factor activity; MRF binding	nucleus; Golgi apparatus; intracellular membrane-bounded organelle; nucleoplasm; chromatin; transcription regulator complex	3.25227e-05	0.176997	0.0179576	1
ENSG00000136830	32917	28849	22898	22058	23674	22684	24387	23876.1	22979.5	24681.4	25623.8	25009.2	37289	36507.7	35136.9	37739.2	39180.2	38240.4	1028.7	997.669	969.562	1042.82	1076.11	1040.72	9	127505339	127578989	654	NIBAN2	protein_coding	niban apoptosis regulator 2	negative regulation of apoptotic process; cell differentiation; positive regulation of DNA-templated transcription; negative regulation of cell population proliferation; negative regulation of angiogenesis; negative regulation of DNA-templated transcription; axon guidance; positive regulation of embryonic development; negative regulation of vascular endothelial growth factor receptor signaling pa…	protein binding; transcription coactivator activity; cadherin binding	nucleus; cytoplasm; membrane; nucleoplasm; cytosol; plasma membrane; anchoring junction; adherens junction; extracellular exosome	0.000436768	0.0800063	0.018352	1
ENSG00000238227	2223	2116	1521	1663	1750	1534	1646.94	1751.25	1526.42	1860.79	1894.13	1691.24	831.368	884.022	770.528	939.316	956.15	853.732	22.9352	24.1582	21.2618	25.9555	26.2613	23.2345	9	136114581	136118875	1981	TMEM250	protein_coding	transmembrane protein 250	cell cycle; positive regulation of cell population proliferation; cilium assembly; positive regulation of viral process; cytoskeleton-dependent cytokinesis	protein binding; GTPase activity; molecular adaptor activity	nucleus; cytoplasm; membrane; nucleoplasm; septin ring; microtubule cytoskeleton; cell division site; septin complex	4.02192e-05	0.143916	0.018389	1
ENSG00000278058	14	6	14	2	1	4	10.3721	4.96573	14.0499	2.23787	1.08236	4.41002	12.9006	6.17628	17.4749	2.78342	1.34622	5.4851	0.355893	0.168783	0.482201	0.0769123	0.0369749	0.149279	16	79605802	79606605	804		lncRNA	novel transcript				-3.25173e-06	-1.91845	0.0185466	1
ENSG00000240771	619	510	435	469	450	457	458.594	422.087	436.549	524.78	487.063	503.845	235.781	217.011	224.447	269.81	250.418	259.046	6.50456	5.9304	6.19335	7.45547	6.87789	7.05001	12	57610180	57617245	1945	ARHGEF25	protein_coding	Rho guanine nucleotide exchange factor 25	regulation of small GTPase mediated signal transduction; axon guidance	guanyl-nucleotide exchange factor activity	cytoplasm; membrane; plasma membrane; sarcomere; cytosol; myofibril; extrinsic component of membrane	-1.65218e-05	0.201151	0.0187653	1
ENSG00000096384	70569	60367	50179	42770	45916	44046	52282	49961	50357.7	47856.8	49697.7	48560.9	20008.4	19120.2	19272	18314.9	19019.4	18584.4	551.978	522.509	531.788	506.083	522.381	505.779	6	44246166	44253888	2613	HSP90AB1	protein_coding	heat shock protein 90 alpha family class B member 1	protein folding; telomere maintenance via telomerase; regulation of macromolecule metabolic process; response to unfolded protein; regulation of nitrogen compound metabolic process; regulation of primary metabolic process; regulation of cell cycle; negative regulation of proteasomal ubiquitin-dependent protein catabolic process; positive regulation of transforming growth factor beta receptor sign…	ATP binding; unfolded protein binding; ATP hydrolysis activity; ATP-dependent protein folding chaperone; DNA polymerase binding; RNA binding; nucleotide binding; protein binding; protein dimerization activity; identical protein binding; cadherin binding; TPR domain binding; tau protein binding; histone methyltransferase binding; peptide binding; histone deacetylase binding; kinase binding; double…	nucleus; cytoplasm; extracellular region; membrane; protein-containing complex; cytosol; plasma membrane; mitochondrion; melanosome; COP9 signalosome; cell surface; dynein axonemal particle; nucleoplasm; extracellular exosome; secretory granule lumen; ficolin-1-rich granule lumen; neuronal cell body; perinuclear region of cytoplasm; axonal growth cone; dendritic growth cone; aryl hydrocarbon rece…	8.03095e-05	-0.0627176	0.0188396	1
ENSG00000138642	421	355	317	316	340	330	311.904	293.806	318.129	353.583	368.003	363.827	441.79	416.155	450.607	500.826	521.25	515.335	12.1878	11.3725	12.434	13.839	14.3165	14.025	4	88378739	88443097	706	HERC6	protein_coding	HECT and RLD domain containing E3 ubiquitin protein ligase family member 6	protein ubiquitination; ubiquitin-dependent protein catabolic process; hematopoietic progenitor cell differentiation; response to bacterium	ubiquitin-protein transferase activity; transferase activity; ubiquitin protein ligase activity	cytoplasm; nucleoplasm; cytosol	2.45275e-05	0.233625	0.018897	1
ENSG00000184897	3866	3490	2744	2802	2977	2594	2864.18	2888.4	2753.77	3135.25	3222.19	2859.9	1889.3	1905.28	1816.47	2068.11	2125.45	1886.48	52.1206	52.0667	50.1234	57.1467	58.3771	51.341	3	129314771	129316286	1516	H1-10	protein_coding	H1.10 linker histone	nucleosome assembly; chromosome condensation; negative regulation of DNA recombination	DNA binding; structural constituent of chromatin; RNA binding; cadherin binding; double-stranded DNA binding; nucleosomal DNA binding	nucleosome; nucleus; nucleoplasm; nucleolus; chromosome	3.83044e-06	0.115288	0.0189027	1
ENSG00000163995	15	19	13	26	22	19	11.113	15.7248	13.0463	29.0923	23.8119	20.9476	4.31906	6.11147	5.07046	11.3067	9.25455	8.14131	0.119151	0.167012	0.139913	0.312432	0.254182	0.221568	4	7965310	8158832	2573	ABLIM2	protein_coding	actin binding LIM protein family member 2	cytoskeleton organization; lamellipodium assembly	actin binding; metal ion binding; actin filament binding; protein binding	cytoplasm; cellular anatomical entity; actin cytoskeleton	6.37062e-06	0.892066	0.0190811	1
ENSG00000213442	291	253	228	229	258	235	215.591	209.388	228.812	256.236	279.249	259.089	408.317	396.569	433.356	485.295	528.881	490.698	11.2644	10.8373	11.9579	13.4098	14.5261	13.3545	12	104265309	104265836	528	RPL18AP3	processed_pseudogene	ribosomal protein L18a pseudogene 3				1.89638e-05	0.283602	0.0191157	1
ENSG00000174705	2982	2938	2441	2261	2367	2327	2209.25	2431.55	2449.69	2529.91	2561.95	2565.53	1584.83	1744.3	1757.31	1814.85	1837.84	1840.41	43.7212	47.6675	48.491	50.1487	50.4775	50.0872	5	172325000	172454525	1394	SH3PXD2B	protein_coding	SH3 and PX domains 2B	cell differentiation; bone development; heart development; skeletal system development; eye development; superoxide metabolic process; extracellular matrix disassembly; superoxide anion generation; adipose tissue development; podosome assembly; protein localization to membrane	protein binding; phosphatidylinositol binding; phosphatidylinositol-3-phosphate binding; phosphatidylinositol-5-phosphate binding; superoxide-generating NADPH oxidase activator activity; SH2 domain binding; phosphatidylinositol-3,5-bisphosphate binding	cytoplasm; cell projection; anchoring junction; podosome	5.06163e-05	0.112499	0.0193412	1
ENSG00000006327	4528	3998	3027	3101	3371	3044	3354.63	3308.83	3037.78	3469.81	3648.64	3356.02	3807.75	3755.77	3448.1	3938.49	4141.48	3809.34	105.046	102.636	95.1464	108.83	113.748	103.672	16	3018445	3022383	881	TNFRSF12A	protein_coding	TNF receptor superfamily member 12A	positive regulation of apoptotic process; apoptotic process; cell adhesion; cell differentiation; angiogenesis; positive regulation of extrinsic apoptotic signaling pathway; regulation of wound healing	protein binding	plasma membrane; membrane	2.61781e-05	0.109409	0.0194115	1
ENSG00000105227	278	230	179	176	219	263	205.96	190.353	179.637	196.932	237.037	289.959	598.721	553.352	522.202	572.477	689.061	842.903	16.5171	15.1218	14.4095	15.8189	18.9255	22.9399	19	40393766	40414793	344	PRX	protein_coding	periaxin	regulation of RNA splicing; axon ensheathment; peripheral nervous system myelin maintenance	protein binding	nucleus; cytoplasm; membrane; plasma membrane; anchoring junction	1.73602e-05	0.327172	0.0194639	1
ENSG00000161036	1771	1658	1235	1284	1309	1306	1312.07	1372.2	1239.4	1436.71	1416.81	1439.87	1549.08	1620.07	1463.28	1696.23	1672.74	1699.97	42.7349	44.2726	40.3775	46.8709	45.9429	46.2651	7	102464956	102473168	847	LRWD1	protein_coding	leucine rich repeats and WD repeat domain containing 1	chromatin organization; DNA replication; DNA replication initiation; establishment of protein localization to chromatin	protein binding; methylated histone binding; chromatin binding; methyl-CpG binding	nucleus; cytoplasm; intracellular membrane-bounded organelle; nucleoplasm; nucleolus; cytoskeleton; chromosome; chromosome, centromeric region; nuclear origin of replication recognition complex; kinetochore; chromosome, telomeric region; centrosome; pericentric heterochromatin	4.43028e-05	0.128294	0.0194728	1
ENSG00000198932	51	54	42	58	78	38	37.784	44.6916	42.1496	64.8981	84.4242	41.8952	6.41604	7.58899	7.15734	11.0202	14.3359	7.11414	0.177001	0.207389	0.197498	0.304515	0.393746	0.193613	X	102651092	102659083	5889	GPRASP1	protein_coding	G protein-coupled receptor associated sorting protein 1	endosome to lysosome transport; G protein-coupled receptor catabolic process	protein binding	cytoplasm; cytosol; nucleus	9.55756e-06	0.620954	0.0196526	1
ENSG00000109586	8500	7424	6117	5107	5574	5312	6297.34	6144.26	6138.78	5714.39	6033.08	5856.5	4018.72	3921.04	3917.54	3646.71	3850.08	3737.4	110.866	107.153	108.1	100.767	105.745	101.714	4	173168811	173323967	1567	GALNT7	protein_coding	polypeptide N-acetylgalactosaminyltransferase 7	protein glycosylation; protein O-linked glycosylation; carbohydrate metabolic process; O-glycan processing; protein modification process	transferase activity; carbohydrate binding; glycosyltransferase activity; polypeptide N-acetylgalactosaminyltransferase activity; metal ion binding	membrane; Golgi apparatus; Golgi membrane; extracellular exosome	-7.26376e-05	-0.0780797	0.0196669	1
ENSG00000120694	8219	7581	6034	5687	5867	6181	6089.16	6274.2	6055.49	6363.37	6350.21	6814.58	1745.74	1798.8	1736.09	1824.36	1820.59	1953.72	48.1604	49.1568	47.9054	50.4114	50.0037	53.1711	13	31134973	31162388	3488	HSPH1	protein_coding	heat shock protein family H (Hsp110) member 1	chaperone cofactor-dependent protein refolding; protein folding; response to unfolded protein; positive regulation of NK T cell activation; positive regulation of MHC class I biosynthetic process	ATP binding; ATP-dependent protein folding chaperone; nucleotide binding; protein binding; alpha-tubulin binding; adenyl-nucleotide exchange factor activity	cytoplasm; protein-containing complex; nucleoplasm; cytosol; nucleus; microtubule; extracellular region; extracellular exosome; endocytic vesicle lumen	5.80821e-05	0.0842263	0.0196734	1
ENSG00000182022	2712	2545	1990	1781	2148	2109	2009.22	2106.3	1997.09	1992.82	2324.91	2325.18	565.5	592.822	562.084	560.884	654.352	654.428	15.6006	16.2004	15.5101	15.4985	17.9722	17.8104	10	124007668	124093598	3553	CHST15	protein_coding	carbohydrate sulfotransferase 15	chondroitin sulfate biosynthetic process; hexose biosynthetic process	transferase activity; protein binding; 3'-phosphoadenosine 5'-phosphosulfate binding; N-acetylgalactosamine 4-sulfate 6-O-sulfotransferase activity	membrane; Golgi apparatus; Golgi membrane	3.46125e-05	0.120055	0.0196974	1
ENSG00000170485	593	523	420	471	467	416	439.332	432.846	421.496	527.017	505.463	458.642	632.588	623.249	606.905	758.844	727.808	660.392	17.4514	17.0319	16.7468	20.9687	19.9897	17.9727	2	100820139	100996829	694.5	NPAS2	protein_coding	neuronal PAS domain protein 2	regulation of DNA-templated transcription; circadian regulation of gene expression; cellular response to DNA damage stimulus; positive regulation of DNA-templated transcription; rhythmic process; regulation of transcription by RNA polymerase II; positive regulation of DNA repair; central nervous system development; response to redox state; response to xenobiotic stimulus; positive regulation of b…	DNA-binding transcription factor activity; protein dimerization activity; DNA-binding transcription factor activity, RNA polymerase II-specific; metal ion binding; DNA binding; protein binding; RNA polymerase II cis-regulatory region sequence-specific DNA binding; sequence-specific double-stranded DNA binding; Hsp90 protein binding	nucleus; cytoplasm; transcription regulator complex; nucleoplasm; cytosol; chromatin; CLOCK-BMAL transcription complex	2.77637e-05	0.203676	0.0197291	1
ENSG00000104368	3859	3267	2705	2407	2899	2917	2858.99	2703.84	2714.63	2693.27	3137.77	3216.01	1136.32	1074.66	1078.95	1070.46	1247.12	1278.22	31.3481	29.3678	29.7723	29.5793	34.2531	34.7872	8	42174718	42207709	2516	PLAT	protein_coding	plasminogen activator, tissue type	proteolysis; plasminogen activation; blood coagulation; protein modification process; negative regulation of proteolysis; negative regulation of plasminogen activation; fibrinolysis; negative regulation of fibrinolysis; response to hypoxia; smooth muscle cell migration; platelet-derived growth factor receptor signaling pathway; prevention of polyspermy; trans-synaptic signaling by BDNF, modulatin…	serine-type endopeptidase activity; protein binding; peptidase activity; hydrolase activity; serine-type peptidase activity; signaling receptor binding; phosphoprotein binding	extracellular region; cytoplasm; cellular anatomical entity; extracellular space; extracellular exosome; cell surface; serine protease inhibitor complex; secretory granule; apical part of cell; Schaffer collateral - CA1 synapse; glutamatergic synapse; signal recognition particle, endoplasmic reticulum targeting	4.42191e-05	0.127956	0.0197519	1
ENSG00000179588	554	534	399	427	504	394	410.438	441.95	400.421	477.784	545.51	434.387	729.02	784.991	711.227	848.64	968.934	771.557	20.1117	21.4519	19.6255	23.4499	26.6124	20.9982	16	88453280	88537031	563	ZFPM1	protein_coding	zinc finger protein, FOG family member 1	regulation of transcription by RNA polymerase II; cell differentiation; anatomical structure morphogenesis; negative regulation of transcription by RNA polymerase II; positive regulation of transcription by RNA polymerase II; heart development; positive regulation of type II interferon production; outflow tract morphogenesis; ventricular septum morphogenesis; atrioventricular valve morphogenesis;…	RNA polymerase II-specific DNA-binding transcription factor binding; protein binding; metal ion binding; DNA binding; transcription corepressor activity	nucleus; chromatin; nucleoplasm; transcription regulator complex; transcription repressor complex	2.19155e-05	0.217942	0.0197753	1
ENSG00000187498	12102	10380	9142	8271	9032	8359	8965.93	8590.71	9174.55	9254.69	9775.89	9215.84	6058.06	5804.54	6199.02	6253.17	6605.33	6226.92	167.125	158.624	171.055	172.79	181.42	169.467	13	110148963	110307157	1480	COL4A1	protein_coding	collagen type IV alpha 1 chain	angiogenesis; extracellular matrix organization; branching involved in blood vessel morphogenesis; retinal blood vessel morphogenesis; brain development; neuromuscular junction development; epithelial cell differentiation; collagen-activated tyrosine kinase receptor signaling pathway; blood vessel morphogenesis; renal tubule morphogenesis; cellular response to amino acid stimulus; basement membra…	extracellular matrix structural constituent; protein binding; extracellular matrix structural constituent conferring tensile strength; platelet-derived growth factor binding	collagen trimer; extracellular region; cellular anatomical entity; basement membrane; extracellular space; collagen-containing extracellular matrix; endoplasmic reticulum lumen; collagen type IV trimer; membrane	-4.66365e-05	0.0799013	0.0198883	1
ENSG00000213639	14794	12892	10568	8951	9784	9072	10960.3	10669.7	10605.6	10015.6	10589.8	10001.9	5328.31	5187.02	5155.87	4869.02	5148.19	4862.38	146.994	141.749	142.27	134.542	141.398	132.331	2	28751640	28802940	2057	PPP1CB	protein_coding	protein phosphatase 1 catalytic subunit beta	cell division; carbohydrate metabolic process; glycogen metabolic process; cell cycle; rhythmic process; circadian regulation of gene expression; regulation of cell adhesion; regulation of circadian rhythm; protein dephosphorylation; entrainment of circadian clock by photoperiod; MAPK cascade	hydrolase activity; protein serine/threonine phosphatase activity; phosphoprotein phosphatase activity; myosin phosphatase activity; metal ion binding; protein binding; phosphatase activity; protein kinase binding; myosin-light-chain-phosphatase activity	nucleoplasm; cytosol; nucleolus; chromosome, telomeric region; nucleus; cytoplasm; focal adhesion; extracellular exosome; PTW/PP1 phosphatase complex	-0.000294125	-0.0749606	0.0199168	1
ENSG00000129932	607	619	433	475	501	486	449.704	512.298	434.542	531.493	542.263	535.817	340.556	387.957	329.074	402.494	410.65	405.768	9.39501	10.602	9.08041	11.1219	11.2788	11.0431	19	3490821	3500674	1320.5	DOHH	protein_coding	deoxyhypusine hydroxylase	peptidyl-lysine modification to peptidyl-hypusine	deoxyhypusine monooxygenase activity; metal ion binding; monooxygenase activity; oxidoreductase activity; iron ion binding; protein binding	cytosol	5.69988e-05	0.203347	0.0203545	1
ENSG00000105447	1954	1754	1304	1419	1481	1313	1447.65	1451.65	1308.64	1587.77	1602.98	1447.59	1643.19	1647.73	1485.41	1802.23	1819.5	1643.12	45.3311	45.0285	40.9881	49.7999	49.9737	44.718	19	48445841	48457022	881	GRWD1	protein_coding	glutamate rich WD repeat containing 1	nucleosome assembly; DNA replication; ribosome biogenesis; nucleosome disassembly	protein binding; RNA binding; DNA replication origin binding; histone binding; chromatin binding	nucleoplasm; nucleolus; nucleus; protein-containing complex; cytosol; chromosome	4.04237e-05	0.138588	0.0203732	1
ENSG00000125817	5107	4448	3639	3555	3689	3479	3783.59	3681.26	3651.96	3977.81	3992.83	3835.61	1309.2	1273.79	1263.65	1376.4	1381.6	1327.2	36.1173	34.8097	34.869	38.0333	37.9466	36.1202	20	3783851	3786740	2890	CENPB	protein_coding	centromere protein B		DNA binding; nucleic acid binding; chromatin binding; sequence-specific DNA binding; satellite DNA binding; centromeric DNA binding	chromosome, centromeric region; nucleus; nucleoplasm; chromosome; nuclear body; condensed chromosome, centromeric region; pericentric heterochromatin	0.000167652	0.0862411	0.0204725	1
ENSG00000259956	5501	5166	4165	3946	4062	4077	4075.49	4275.49	4179.83	4415.31	4396.55	4494.91	615.261	645.455	631.013	666.562	663.731	678.58	16.9734	17.6387	17.4121	18.4187	18.2298	18.4677	3	51391285	51397908	6624	RBM15B	protein_coding	RNA binding motif protein 15B	mRNA processing; RNA splicing; RNA methylation; mRNA export from nucleus; regulation of alternative mRNA splicing, via spliceosome; dosage compensation by inactivation of X chromosome	RNA binding; nucleic acid binding; protein binding; mRNA binding	nucleus; nuclear speck; nucleoplasm; nuclear envelope; RNA N6-methyladenosine methyltransferase complex	3.336e-05	0.0869363	0.0205441	1
ENSG00000164587	30642	27623	21739	19226	19143	19815	22701.5	22861.4	21816.4	21512.6	20719.6	21846.1	32877	33108.5	31595.1	31155.1	30006.7	31638.1	906.986	904.775	871.83	860.889	824.155	861.041	5	150442635	150449739	690.5	RPS14	protein_coding	ribosomal protein S14	translation; negative regulation of transcription by RNA polymerase II; ribosomal small subunit assembly; erythrocyte differentiation; ribosomal small subunit biogenesis; maturation of SSU-rRNA; regulation of translation; cytoplasmic translation	structural constituent of ribosome; RNA binding; protein binding; mRNA 5'-UTR binding; translation regulator activity	ribosome; nucleus; cytoplasm; membrane; ribonucleoprotein complex; focal adhesion; nucleolus; small ribosomal subunit; cytosolic small ribosomal subunit; nucleoplasm; cytosol; extracellular exosome; small-subunit processome; cytosolic ribosome; postsynaptic density; synapse	-3.28532e-05	-0.0726724	0.0205714	1
ENSG00000091409	5184	4453	3524	3440	3800	3583	3840.64	3685.4	3536.55	3849.13	4112.97	3950.27	1815.47	1742.09	1671.73	1819.49	1944.21	1867.3	50.084	47.6073	46.1295	50.2768	53.399	50.8191	2	172427354	172506459	2115.5	ITGA6	protein_coding	integrin subunit alpha 6	cell adhesion; integrin-mediated signaling pathway; positive regulation of GTPase activity; positive regulation of transcription by RNA polymerase II; positive regulation of cell migration; cell-cell adhesion; positive regulation of neuron projection development; positive regulation of phosphorylation; cell-substrate adhesion; cell-matrix adhesion; cell adhesion mediated by integrin; skin morphog…	metal ion binding; protein binding; cadherin binding; integrin binding; insulin-like growth factor I binding; neuregulin binding; laminin binding; protein-containing complex binding	integrin complex; membrane; plasma membrane; focal adhesion; cell surface; external side of plasma membrane; adherens junction; filopodium; integrin alpha6-beta4 complex	6.89157e-05	0.10593	0.020768	1
ENSG00000279631	10	7	4	14	18	7	7.40863	5.79335	4.01424	15.6651	19.4825	7.71753	2.94227	2.30078	1.59422	6.22123	7.73729	3.06495	0.0811692	0.0628747	0.0439906	0.171907	0.21251	0.0834134	10	22252072	22254589	2518		TEC	TEC				2.62346e-06	1.29307	0.0208594	1
ENSG00000137076	25213	22144	19325	17461	18506	17882	18679.4	18326.9	19393.8	19537.7	20030.2	19715	23407.8	22966	24303	24483.3	25100.5	24705.5	645.756	627.606	670.614	676.532	689.402	672.367	9	35696948	35732195	798	TLN1	protein_coding	talin 1	cell adhesion; platelet aggregation; cell-cell adhesion; cell-cell junction assembly; regulation of focal adhesion assembly; cell-substrate junction assembly; integrin-mediated signaling pathway; cortical actin cytoskeleton organization; integrin activation	actin filament binding; actin binding; structural constituent of cytoskeleton; protein binding; LIM domain binding; cadherin binding; integrin binding; vinculin binding; phosphatidylserine binding; phosphatidylinositol binding	cytoskeleton; focal adhesion; ruffle; cytoplasm; membrane; cell projection; plasma membrane; anchoring junction; cell surface; extracellular region; ruffle membrane; cytosol; extracellular exosome; adherens junction	7.71043e-05	0.0721566	0.0208793	1
ENSG00000168306	94	98	53	42	33	50	69.6412	81.1069	53.1887	46.9952	35.7179	55.1252	100.492	117.037	76.7514	67.8141	51.541	79.5458	2.77231	3.19835	2.11787	1.87386	1.41561	2.16486	3	58505136	58537283	693	ACOX2	protein_coding	acyl-CoA oxidase 2	fatty acid beta-oxidation; fatty acid metabolic process; lipid metabolic process; bile acid biosynthetic process; fatty acid beta-oxidation using acyl-CoA oxidase; lipid homeostasis; very long-chain fatty acid metabolic process	flavin adenine dinucleotide binding; oxidoreductase activity, acting on the CH-CH group of donors; acyl-CoA oxidase activity; FAD binding; oxidoreductase activity; protein homodimerization activity; protein binding; fatty acid binding; palmitoyl-CoA oxidase activity; 3alpha,7alpha,12alpha-trihydroxy-5beta-cholestanoyl-CoA 24-hydroxylase activity	peroxisome; intracellular membrane-bounded organelle; cytosol; peroxisomal matrix	-9.91226e-06	-0.573217	0.0209129	1
ENSG00000133935	2464	2212	1794	1529	1495	1558	1825.49	1830.7	1800.39	1710.85	1618.13	1717.7	786.848	789.094	776.029	737.435	697.47	740.389	21.707	21.5641	21.4136	20.3771	19.1565	20.1499	14	75649791	75660876	2320	ERG28	protein_coding	ergosterol biosynthesis 28 homolog	lipid metabolic process; steroid biosynthetic process; steroid metabolic process; sterol biosynthetic process	protein binding; identical protein binding; protein-macromolecule adaptor activity	membrane; endoplasmic reticulum; endoplasmic reticulum membrane; transport vesicle	-0.000278053	-0.113155	0.0209873	1
ENSG00000289537	48	39	26	22	12	13	35.5614	32.2772	26.0926	24.6165	12.9883	14.3326	25.7505	23.3724	18.894	17.8251	9.40502	10.3784	0.710386	0.638711	0.521357	0.492551	0.258315	0.282451	20	62181600	62182980	1381		lncRNA	novel transcript, antisense to SS18L1				-6.46343e-06	-0.864958	0.021497	1
ENSG00000112578	1187	1013	810	846	863	840	879.405	838.381	812.884	946.617	934.078	926.104	762.71	727.13	705.017	821.004	810.128	803.212	21.0411	19.8707	19.4541	22.6863	22.2507	21.8597	6	41921499	41933046	1153	BYSL	protein_coding	bystin like	ribosome biogenesis; regulation of protein localization to nucleolus; rRNA processing; maturation of SSU-rRNA from tricistronic rRNA transcript (SSU-rRNA, 5.8S rRNA, LSU-rRNA); in utero embryonic development; blastocyst formation; trophectodermal cell differentiation; stem cell proliferation	RNA binding; protein binding; snoRNA binding	nucleus; cytoplasm; membrane; intracellular membrane-bounded organelle; nucleoplasm; nucleolus; chromosome; intracellular organelle; cytosol; preribosome, small subunit precursor; apical part of cell	3.77426e-05	0.147409	0.0219755	1
ENSG00000039523	3486	3132	2649	2439	2674	2485	2582.65	2592.11	2658.43	2729.08	2894.23	2739.72	3617.16	3630.41	3723.3	3822.24	4053.55	3837.15	99.7875	99.2104	102.74	105.617	111.333	104.429	16	67518418	67546788	714	RIPOR1	protein_coding	RHO family interacting cell polarization regulator 1	Rho protein signal transduction; cellular response to starvation; positive regulation of cell migration; establishment of Golgi localization; positive regulation of intracellular protein transport; response to wounding; protein localization to Golgi apparatus; cellular response to chemokine; negative regulation of Rho protein signal transduction; negative regulation of Rho guanyl-nucleotide excha…	protein binding; 14-3-3 protein binding	cytoplasm; membrane; Golgi apparatus; extracellular exosome; vesicle membrane; cell leading edge	0.000146134	0.0951939	0.0220599	1
ENSG00000089127	57	53	42	54	69	58	42.2292	43.8639	42.1496	60.4224	74.6829	63.9453	26.3439	27.3637	26.2942	37.6933	46.5895	39.891	0.726756	0.747784	0.725557	1.04156	1.27961	1.08565	12	112905856	112933219	1603	OAS1	protein_coding	2'-5'-oligoadenylate synthetase 1	immune system process; innate immune response; defense response to virus; glucose metabolic process; response to virus; negative regulation of viral genome replication; positive regulation of tumor necrosis factor production; defense response to bacterium; antiviral innate immune response; glucose homeostasis; positive regulation of interferon-beta production; toll-like receptor 3 signaling pathw…	nucleotidyltransferase activity; RNA binding; metal ion binding; nucleotide binding; ATP binding; transferase activity; protein binding; 2'-5'-oligoadenylate synthetase activity; double-stranded RNA binding	nucleus; cytoplasm; extracellular region; endoplasmic reticulum; nucleoplasm; cytosol; intracellular membrane-bounded organelle; mitochondrion; membrane; ribosome	1.04007e-05	0.634556	0.0221273	1
ENSG00000198804	757633	689545	570562	478708	517599	493714	561303	570682	572594	535642	560229	544322	364009	370092	371332	347368	363313	352997	10042	10113.7	10246.5	9598.61	9978.65	9606.93	MT	5904	7445	1542	MT-CO1	protein_coding	mitochondrially encoded cytochrome c oxidase I	aerobic respiration; proton transmembrane transport; oxidative phosphorylation; electron transport chain; mitochondrial electron transport, cytochrome c to oxygen; cellular respiration; electron transport coupled proton transport; response to hypoxia; response to oxidative stress; cerebellum development; response to copper ion; response to electrical stimulus	cytochrome-c oxidase activity; heme binding; metal ion binding; protein binding	membrane; respiratory chain complex IV; mitochondrion; mitochondrial inner membrane; respirasome; mitochondrial respiratory chain complex IV; mitochondrial membrane; mitochondrial respiratory chain complex III	-0.0342903	-0.0555428	0.0222075	1
ENSG00000215041	1295	1172	1009	1062	949	952	959.418	969.973	1012.59	1188.31	1027.16	1049.58	1084.7	1096.63	1144.82	1343.48	1161.29	1186.64	29.924	29.9684	31.59	37.1235	31.8956	32.2948	17	7315628	7329393	884.5	NEURL4	protein_coding	neuralized E3 ubiquitin protein ligase 4		protein binding; ubiquitin protein ligase activity	cytoplasm; centriole; cytoskeleton	2.35081e-05	0.151147	0.0222099	1
ENSG00000133641	1678	1497	1268	1011	1096	1013	1243.17	1238.95	1272.52	1131.24	1186.27	1116.84	1058.92	1055.32	1083.91	963.579	1010.45	951.309	29.2127	28.8395	29.9093	26.6259	27.7527	25.8902	12	88033846	88050160	1174	RLIG1	protein_coding	RNA 5'-phosphate and 3'-OH ligase 1	response to reactive oxygen species; RNA repair; protein adenylylation; hematopoietic progenitor cell differentiation	nucleotide binding; ATP binding; ligase activity; RNA ligase (ATP) activity		-8.32003e-05	-0.127851	0.0222938	1
ENSG00000106034	4898	4344	3540	3026	3203	2980	3628.75	3595.19	3552.61	3385.89	3466.8	3285.46	2194.59	2174.29	2148.54	2047.71	2096.65	1986.98	60.5427	59.4182	59.2864	56.5831	57.5858	54.0761	7	120988697	121297442	1653.5	CPED1	protein_coding	cadherin like and PC-esterase domain containing 1			endoplasmic reticulum	-6.30967e-05	-0.0883979	0.0223239	1
ENSG00000228639	14	14	20	3	5	5	10.3721	11.5867	20.0712	3.3568	5.41181	5.51252	16.0808	17.9639	31.1182	5.20434	8.3904	8.54655	0.443624	0.49091	0.85867	0.143808	0.230448	0.232597	17	72021851	72058073	645	ROCR	lncRNA	regulator of chondrogenesis RNA				-3.63588e-06	-1.5416	0.0223802	1
ENSG00000287620	21	18	19	6	6	7	15.5581	14.8972	19.0677	6.7136	6.49417	7.71753	12.4366	11.9082	15.2419	5.36659	5.19118	6.16909	0.343091	0.325423	0.420583	0.148291	0.142579	0.167894	3	39177761	39179586	1251		lncRNA	novel transcript				-4.52915e-06	-1.23727	0.0224464	1
ENSG00000100106	4882	4312	3498	3304	3748	3348	3616.9	3568.7	3510.46	3696.95	4056.69	3691.19	3851.86	3800.54	3738.5	3937.12	4320.22	3930.98	106.262	103.86	103.16	108.792	118.658	106.983	22	37697048	37776556	939	TRIOBP	protein_coding	TRIO and F-actin binding protein	cell division; cell cycle; barbed-end actin filament capping; positive regulation of substrate adhesion-dependent cell spreading; actin modification; sensory perception of sound; auditory receptor cell stereocilium organization	actin binding; small GTPase binding; ubiquitin protein ligase binding; actin filament binding; myosin II binding	nucleus; cytoplasm; cytoskeleton; focal adhesion; chromosome; midbody; actin cytoskeleton; chromosome, telomeric region; centrosome; stereocilium base	0.000126731	0.0973741	0.0225436	1
ENSG00000180592	78	53	50	29	32	26	57.7874	43.8639	50.178	32.4491	34.6356	28.6651	28.0589	21.2983	24.3642	15.7558	16.8175	13.9185	0.774069	0.582033	0.672301	0.43537	0.461903	0.378796	10	21513475	21526368	2059.5	SKIDA1	protein_coding	SKI/DACH domain containing 1	regulation of transcription by RNA polymerase II	DNA-binding transcription factor activity		-8.18107e-06	-0.667378	0.022591	1
ENSG00000269821	696	547	567	391	432	351	515.641	452.709	569.019	437.503	467.58	386.979	420.245	368.956	463.748	356.563	381.076	315.386	11.5934	10.0827	12.7966	9.85268	10.4665	8.58333	11	2597308	2700003	1227	KCNQ1OT1	lncRNA	KCNQ1 opposite strand/antisense transcript 1	heterochromatin formation		nucleolus	-2.11916e-05	-0.248489	0.0227534	1
ENSG00000182093	791	691	620	425	482	507	586.023	571.887	622.208	475.547	521.698	558.97	453.578	442.637	481.585	368.07	403.791	432.639	12.513	12.0962	13.2888	10.1706	11.0904	11.7744	21	39377698	39428528	1292	GET1	protein_coding	guided entry of tail-anchored proteins factor 1	tail-anchored membrane protein insertion into ER membrane; establishment of protein localization to membrane; protein stabilization; protein insertion into ER membrane	protein binding; protein-membrane adaptor activity	membrane; endoplasmic reticulum membrane; endoplasmic reticulum; nucleus; GET complex	-2.81034e-05	-0.192101	0.0227927	1
ENSG00000184898	1976	1799	1509	1253	1307	1133	1463.95	1488.89	1514.37	1402.02	1414.65	1249.14	615.75	626.242	636.96	589.705	595.014	525.4	16.9869	17.1137	17.5762	16.2949	16.3425	14.2989	2	151247940	151261863	2377.5	RBM43	protein_coding	RNA binding motif protein 43		RNA binding; nucleic acid binding; protein binding		-3.9829e-05	-0.135202	0.0229453	1
ENSG00000226124	35	31	14	10	11	8	25.9302	25.6563	14.0499	11.1893	11.906	8.82004	20.1556	19.9427	10.921	8.6975	9.25455	6.85584	0.556039	0.544986	0.301352	0.240332	0.254182	0.186584	2	199760544	199851192	1286.5	FTCDNL1	protein_coding	formiminotransferase cyclodeaminase N-terminal like		transferase activity; folic acid binding	intracellular membrane-bounded organelle	-8.87175e-06	-1.05348	0.0231975	1
ENSG00000141441	673	560	487	456	550	499	498.601	463.468	488.734	510.233	595.299	550.15	131.505	122.239	128.903	134.573	157.009	145.101	3.62787	3.34049	3.55692	3.71857	4.31235	3.94896	18	32124877	32470882	3791.5	GAREM1	protein_coding	GRB2 associated regulator of MAPK1 subtype 1	positive regulation of cell division; positive regulation of cell population proliferation; positive regulation of ERK1 and ERK2 cascade; epidermal growth factor receptor signaling pathway; cellular response to epidermal growth factor stimulus	protein binding; proline-rich region binding	plasma membrane	3.06361e-05	0.190831	0.0232157	1
ENSG00000151012	8138	7472	6360	4969	5396	5542	6029.15	6183.99	6382.65	5559.98	5840.42	6110.08	1154.79	1184.45	1222.5	1064.93	1118.64	1170.29	31.8575	32.3681	33.7333	29.4264	30.7242	31.8498	4	138164097	138242349	5221	SLC7A11	protein_coding	solute carrier family 7 member 11	transmembrane transport; amino acid transport; amino acid transmembrane transport; L-glutamate transmembrane transport; response to toxic substance; L-cystine transport; neutral amino acid transport; negative regulation of ferroptosis; glutathione metabolic process; response to oxidative stress; brain development; visual learning; response to organic cyclic compound; ventricular system developmen…	transmembrane transporter activity; protein binding; L-amino acid transmembrane transporter activity; cystine:glutamate antiporter activity; L-kynurenine transmembrane transporter activity	membrane; cell projection; plasma membrane; cell surface; microvillus membrane; brush border membrane; apical part of cell; astrocyte projection	-0.000213006	-0.0861173	0.0233271	1
ENSG00000245648	36	20	12	34	26	31	26.6711	16.5524	12.0427	38.0437	28.1414	34.1776	36.864	22.8783	16.6451	52.5829	38.8962	47.2393	1.01698	0.625209	0.459302	1.45299	1.06831	1.28563	12	10363638	10398506	723.5	KLRK1-AS1	lncRNA	KLRK1 antisense RNA 1				9.97112e-06	0.835743	0.0234148	1
ENSG00000131771	21	10	17	1	7	5	15.5581	8.27622	17.0605	1.11893	7.57653	5.51252	11.482	6.10791	12.5908	0.825781	5.59153	4.06828	0.316758	0.166915	0.347428	0.0228183	0.153575	0.110719	17	39626740	39636626	1355	PPP1R1B	protein_coding	protein phosphatase 1 regulatory inhibitor subunit 1B	signal transduction; intracellular signal transduction; negative regulation of phosphoprotein phosphatase activity; response to amphetamine; DNA-templated transcription; negative regulation of female receptivity; locomotory behavior; visual learning; response to morphine; behavioral response to cocaine; cellular response to cocaine	protein phosphatase inhibitor activity; protein binding; protein kinase inhibitor activity; cAMP-dependent protein kinase inhibitor activity; protein phosphatase regulator activity	cytoplasm; cytosol; nucleus; neuronal cell body	-3.64705e-06	-1.51466	0.0234914	1
ENSG00000105939	4371	3659	3150	2934	3285	2969	3238.31	3028.27	3161.22	3282.95	3555.56	3273.34	758.743	709.529	740.679	769.201	833.073	766.949	20.9317	19.3897	20.4382	21.2548	22.8809	20.8727	7	139043515	139132122	4268	ZC3HAV1	protein_coding	zinc finger CCCH-type containing, antiviral 1	immune system process; innate immune response; defense response to virus; positive regulation of mRNA catabolic process; response to virus; negative regulation of viral genome replication; positive regulation of type I interferon production; positive regulation of I-kappaB kinase/NF-kappaB signaling; positive regulation of interferon-alpha production; positive regulation of interferon-beta produc…	metal ion binding; NAD+ ADP-ribosyltransferase activity; RNA binding; protein binding; cadherin binding	nucleus; cytoplasm; cytosol	5.51703e-05	0.101016	0.0235574	1
ENSG00000064932	2842	2461	2042	2051	2085	1928	2105.53	2036.78	2049.27	2294.93	2256.72	2125.63	1983.55	1918.77	1930.54	2161.97	2125.98	2002.48	54.7206	52.4355	53.2711	59.7403	58.3914	54.498	19	1107637	1174268	1061.5	SBNO2	protein_coding	strawberry notch homolog 2	regulation of DNA-templated transcription; cell differentiation; ossification; positive regulation of transcription by RNA polymerase II; cellular response to lipopolysaccharide; negative regulation of DNA-templated transcription; regulation of inflammatory response; osteoclast differentiation; cellular response to interleukin-6; macrophage activation involved in immune response; cellular respons…	histone binding; chromatin DNA binding	nucleus	4.90982e-05	0.108489	0.0237116	1
ENSG00000130204	3361	2788	2196	2230	2442	2216	2490.04	2307.41	2203.82	2495.22	2643.13	2443.15	1458.72	1351.73	1291.05	1461.76	1548.4	1431.25	40.2422	36.9397	35.625	40.3918	42.528	38.952	19	44890569	44903689	1707	TOMM40	protein_coding	translocase of outer mitochondrial membrane 40	transmembrane transport; protein import into mitochondrial matrix; protein transport; monoatomic ion transport; protein targeting to mitochondrion; protein insertion into mitochondrial outer membrane	protein transmembrane transporter activity; porin activity; protein binding	mitochondrial outer membrane; membrane; cytosol; mitochondrion; pore complex; mitochondria-associated endoplasmic reticulum membrane; mitochondrial outer membrane translocase complex; mitochondrial inner membrane	4.69547e-05	0.113183	0.0239028	1
ENSG00000156222	0	0	0	1	1	5	0	0	0	1.11893	1.08236	5.51252	0	0	0	0.467098	0.451831	2.3012	0	0	0	0.012907	0.0124098	0.0626278	15	84884654	84945798	2395.5	SLC28A1	protein_coding	solute carrier family 28 member 1	nucleoside transmembrane transport; pyrimidine nucleobase transport; cytidine transport; uridine transport; azole transmembrane transport; pyrimidine-containing compound transmembrane transport; purine nucleobase transmembrane transport	nucleoside transmembrane transporter activity; symporter activity; purine nucleobase transmembrane transporter activity; nucleoside:sodium symporter activity; cytidine transmembrane transporter activity; uridine transmembrane transporter activity; pyrimidine- and adenine-specific:sodium symporter activity; azole transmembrane transporter activity	membrane; nuclear speck; cytosol; plasma membrane; apical plasma membrane; brush border membrane	1.20789e-06	4.03836	0.0239175	1
ENSG00000270240	0	2	1	3	2	14	0	1.65524	1.00356	3.3568	2.16472	15.4351	0	3.45202	2.09293	7.00062	4.51454	32.1899	0	0.0943355	0.057752	0.193444	0.123995	0.876058	17	35868967	35885863	479.5		lncRNA	novel transcript, antisense to CCL5				2.14458e-06	3.01684	0.0239249	1
ENSG00000291056	4	9	7	1	1	0	2.96345	7.4486	7.02493	1.11893	1.08236	0	2.88274	7.24572	6.83359	1.08846	1.05288	0	0.0795269	0.198008	0.188565	0.0300766	0.0289181	0	10	38383023	38402916	1028	SEPTIN7P9	lncRNA	septin 7 pseudogene 9				-2.24848e-06	-2.97367	0.0239279	1
ENSG00000223960	3354	2863	2365	2022	2139	1948	2484.86	2369.48	2373.42	2262.48	2315.17	2147.68	2013.66	1920.16	1923.36	1833.45	1876.15	1740.42	55.5514	52.4735	53.0728	50.6627	51.5298	47.366	2	178413635	178440243	1234	CHROMR	lncRNA	cholesterol induced regulator of metabolism RNA				-6.70278e-05	-0.104598	0.0239357	1
ENSG00000100294	491	431	340	386	378	356	363.764	356.705	341.211	431.908	409.133	392.492	432.28	423.892	405.479	513.26	486.194	466.419	11.9254	11.584	11.1887	14.1826	13.3537	12.6937	22	43132209	43143398	841.5	MCAT	protein_coding	malonyl-CoA-acyl carrier protein transacylase	lipid metabolic process; fatty acid metabolic process; fatty acid biosynthetic process; monocarboxylic acid metabolic process; fatty acid beta-oxidation	transferase activity; RNA binding; [acyl-carrier-protein] S-malonyltransferase activity; S-malonyltransferase activity	mitochondrion; mitochondrial matrix	2.47298e-05	0.214463	0.0239556	1
ENSG00000139211	1689	1623	1262	1170	1227	1557	1251.32	1343.23	1266.49	1309.15	1328.06	1716.6	388.126	416.635	392.833	406.064	411.928	532.444	10.7073	11.3856	10.8398	11.2205	11.3139	14.4906	12	47075707	47079959	3224	AMIGO2	protein_coding	adhesion molecule with Ig like domain 2	cell adhesion; brain development; homophilic cell adhesion via plasma membrane adhesion molecules; heterophilic cell-cell adhesion via plasma membrane cell adhesion molecules; negative regulation of programmed cell death; positive regulation of synapse assembly	protein binding	nucleus; membrane; plasma membrane	2.93255e-05	0.173255	0.0239679	1
ENSG00000090924	1577	1378	1323	1210	1201	1227	1168.34	1140.46	1327.71	1353.91	1299.92	1352.77	2108.92	2058.6	2396.59	2443.88	2346.42	2441.83	58.1794	56.2565	66.1311	67.5301	64.446	66.4551	19	39412669	39428415	554	PLEKHG2	protein_coding	pleckstrin homology and RhoGEF domain containing G2	regulation of actin filament polymerization	guanyl-nucleotide exchange factor activity; protein binding; small GTPase binding	cytosol	3.71439e-05	0.142477	0.0240857	1
ENSG00000213699	1801	1679	1353	1316	1409	1324	1334.3	1389.58	1357.82	1472.52	1525.05	1459.72	363.42	378.477	369.826	401.067	415.374	397.58	10.0258	10.3429	10.2049	11.0824	11.4085	10.8203	2	26764284	26781231	3671.5	SLC35F6	protein_coding	solute carrier family 35 member F6	transmembrane transport; positive regulation of cell population proliferation; negative regulation of mitochondrial outer membrane permeabilization involved in apoptotic signaling pathway	transmembrane transporter activity; protein binding	membrane; intracellular membrane-bounded organelle; nucleoplasm; cytosol; mitochondrion; lysosome; lysosomal membrane; extracellular exosome	4.97341e-05	0.127313	0.0241553	1
ENSG00000150630	1351	1166	1021	940	998	1051	1000.91	965.007	1024.64	1051.8	1080.2	1158.73	663.291	639.501	679.016	697.016	715.836	767.881	18.2984	17.476	18.7367	19.2602	19.6609	20.8981	4	176683538	176792922	1509	VEGFC	protein_coding	vascular endothelial growth factor C	cell differentiation; positive regulation of cell division; angiogenesis; positive regulation of cell population proliferation; response to hypoxia; signal transduction; sprouting angiogenesis; vascular endothelial growth factor receptor signaling pathway; positive chemotaxis; positive regulation of protein phosphorylation; induction of positive chemotaxis; positive regulation of endothelial cell…	growth factor activity; protein binding; receptor ligand activity; chemoattractant activity; vascular endothelial growth factor receptor binding; vascular endothelial growth factor receptor 3 binding	membrane; extracellular region; extracellular space; platelet alpha granule lumen	3.8125e-05	0.138834	0.0242507	1
ENSG00000173193	1313	1175	1010	899	1058	1013	972.754	972.455	1013.6	1005.92	1145.14	1116.84	186.031	185.974	193.841	192.373	218.998	213.585	5.13208	5.08221	5.34883	5.31573	6.01492	5.81278	3	122680839	122730840	5229	PARP14	protein_coding	poly(ADP-ribose) polymerase family member 14	negative regulation of DNA-templated transcription; immune system process; innate immune response; negative regulation of gene expression; negative regulation of tyrosine phosphorylation of STAT protein; positive regulation of tyrosine phosphorylation of STAT protein; negative regulation of type II interferon-mediated signaling pathway; positive regulation of interleukin-4-mediated signaling path…	NAD+ ADP-ribosyltransferase activity; transferase activity; enzyme binding; glycosyltransferase activity; nucleotidyltransferase activity; protein binding; transcription corepressor activity; NAD+-protein ADP-ribosyltransferase activity	nucleus; cytoplasm; membrane; cytosol; plasma membrane	3.71226e-05	0.144675	0.0242907	1
ENSG00000166246	51	38	27	18	14	16	37.784	31.4496	27.0961	20.1408	15.1531	17.6401	15.3781	12.8	11.0281	8.19731	6.1673	7.17952	0.424241	0.349794	0.304309	0.226511	0.169389	0.195393	16	4734344	4749396	2457	DNAAF8	protein_coding	dynein axonemal assembly factor 8	outer dynein arm assembly	dynein complex binding	cytoplasm; dynein axonemal particle	-8.17419e-06	-0.871911	0.0243776	1
ENSG00000114353	21547	19424	15770	14773	15429	15046	15963.4	16075.7	15826.2	16530	16699.8	16588.3	7505.12	7557.93	7440.6	7771.51	7851.32	7798.91	207.046	206.54	205.315	214.745	215.642	212.25	3	50226292	50259362	2127	GNAI2	protein_coding	G protein subunit alpha i2	G protein-coupled receptor signaling pathway; signal transduction; adenylate cyclase-modulating G protein-coupled receptor signaling pathway; cell division; cell cycle; positive regulation of cell population proliferation; adenylate cyclase-inhibiting G protein-coupled receptor signaling pathway; response to nutrient; negative regulation of adenylate cyclase activity; gamma-aminobutyric acid sign…	GTPase activity; GTP binding; G-protein beta/gamma-subunit complex binding; guanyl nucleotide binding; metal ion binding; nucleotide binding; protein binding; G protein-coupled receptor binding	cytoplasm; membrane; nucleoplasm; cytosol; plasma membrane; cytoskeleton; synapse; midbody; centrosome; heterotrimeric G-protein complex; extracellular exosome; extracellular vesicle; dendrite; cell body; neuronal dense core vesicle	6.73918e-05	0.057607	0.0244359	1
ENSG00000148700	6402	5650	4922	4139	4124	4055	4743.01	4676.06	4939.53	4631.26	4463.66	4470.66	7516.65	7410.56	7828.09	7339.56	7073.94	7085.03	207.364	202.513	216.007	202.809	194.291	192.821	10	109996368	110135565	631	ADD3	protein_coding	adducin 3	cytoskeleton organization; barbed-end actin filament capping; response to xenobiotic stimulus; positive regulation of vasoconstriction; positive regulation of cytoskeleton organization	actin binding; calmodulin binding; actin filament binding; structural constituent of cytoskeleton; protein kinase C binding	cytoplasm; membrane; plasma membrane; cytoskeleton; cytosol; postsynaptic density; condensed nuclear chromosome; brush border; cell-cell junction; cell cortex	-7.29819e-05	-0.0813423	0.0246874	1
ENSG00000238083	154	202	130	80	116	82	114.093	167.18	130.463	89.5146	125.554	90.4054	26.6448	39.0424	30.4678	20.9049	29.3213	21.1129	0.735057	1.06694	0.840722	0.577651	0.80533	0.574593	17	46511508	46556910	4282	LRRC37A2	protein_coding	leucine rich repeat containing 37 member A2		protein binding	membrane	-1.3849e-05	-0.428555	0.0248192	1
ENSG00000100220	4361	4085	3245	3168	3139	3240	3230.91	3380.83	3256.56	3544.78	3397.53	3572.12	5287.9	5533.28	5329.88	5801.6	5560.61	5846.34	145.879	151.211	147.072	160.312	152.726	159.11	22	32387582	32412248	611	RTCB	protein_coding	RNA 2',3'-cyclic phosphate and 5'-OH ligase	RNA processing; tRNA splicing, via endonucleolytic cleavage and ligation; tRNA processing; tRNA exon ligation utilizing 2',3' cyclic phosphate of 5'-exon as source of linkage phosphate; in utero embryonic development; placenta development	RNA ligase activity; RNA ligase (ATP) activity; RNA binding; metal ion binding; nucleotide binding; GTP binding; ligase activity; protein binding; vinculin binding; ligase activity, forming phosphoric ester bonds	tRNA-splicing ligase complex; nucleus; cytoplasm; intracellular membrane-bounded organelle; nucleoplasm; cytosol; nuclear envelope; endoplasmic reticulum membrane	5.04856e-05	0.0913942	0.0248567	1
ENSG00000286746	0	0	0	3	2	2	0	0	0	3.3568	2.16472	2.20501	0	0	0	1.93699	1.24912	1.27237	0	0	0	0.0535235	0.0343079	0.0346278	13	80697177	81017737	1733		lncRNA	novel transcript				1.18757e-06	4.04006	0.0249811	1
ENSG00000182916	1019	799	635	511	603	525	754.94	661.27	637.261	571.775	652.664	578.815	760.262	665.931	641.753	575.805	657.265	582.895	20.9736	18.1983	17.7084	15.9109	18.0522	15.8637	X	103330229	103332326	993	TCEAL7	protein_coding	transcription elongation factor A like 7	negative regulation of NF-kappaB transcription factor activity; negative regulation of DNA-templated transcription		nucleus; nucleoplasm	-2.7491e-05	-0.190098	0.0251246	1
ENSG00000177990	680	598	566	417	423	390	503.787	494.918	568.015	466.595	457.839	429.977	571.187	561.131	644.008	529.019	519.092	487.502	15.7575	15.3344	17.7707	14.6181	14.2572	13.2675	12	63558913	63668939	882	DPY19L2	protein_coding	dpy-19 like 2	cell differentiation; spermatogenesis; spermatid development	transferase activity; glycosyltransferase activity; mannosyltransferase activity	membrane; nucleus; nuclear inner membrane	-2.51198e-05	-0.207242	0.0251978	1
ENSG00000171552	16852	15216	12410	11532	12024	12150	12485	12593.1	12454.2	12903.5	13014.3	13395.4	5108.44	5152.66	5095.82	5279.68	5325.01	5480.95	140.928	140.81	140.613	145.89	146.255	149.166	20	31664452	31723989	2444	BCL2L1	protein_coding	BCL2 like 1	regulation of apoptotic process; negative regulation of apoptotic process; apoptotic process; response to stress; response to external stimulus; regulation of apoptotic signaling pathway; endocytosis; negative regulation of intrinsic apoptotic signaling pathway; negative regulation of extrinsic apoptotic signaling pathway in absence of ligand; negative regulation of extrinsic apoptotic signaling …	protein binding; identical protein binding; protein kinase binding; BH3 domain binding; protein homodimerization activity; protein heterodimerization activity	membrane; nucleus; cytoplasm; cytoplasmic vesicle; mitochondrion; mitochondrial inner membrane; mitochondrial matrix; mitochondrial outer membrane; cytoskeleton; cytosol; mitochondrial membrane; synapse; nuclear membrane; Bcl-2 family protein complex; synaptic vesicle membrane; centrosome; endoplasmic reticulum	7.90069e-05	0.0668534	0.0252124	1
ENSG00000155506	14500	12805	10944	10026	10549	10161	10742.5	10597.7	10983	11218.4	11417.8	11202.6	13068.8	12892.6	13361.3	13647.7	13890.3	13628.4	360.532	352.323	368.689	377.119	381.507	370.901	5	154682986	154817605	822	LARP1	protein_coding	La ribonucleoprotein 1, translational regulator	mRNA stabilization; translation; translational initiation; regulation of translation; negative regulation of translation; negative regulation of translational initiation; TOR signaling; positive regulation of macroautophagy; cell population proliferation; positive regulation of viral genome replication; positive regulation of translation; response to amino acid starvation; TORC1 signaling; post-t…	RNA cap binding; RNA binding; mRNA 3'-UTR binding; protein binding; RNA 7-methylguanosine cap binding; cadherin binding; translation initiation factor binding; eukaryotic initiation factor 4E binding; ribosomal small subunit binding; mRNA 5'-UTR binding; translation activator activity	cytoplasm; membrane; cytoplasmic stress granule; TORC1 complex; cytosol; polysome; polysomal ribosome; ribonucleoprotein complex	7.86262e-05	0.066389	0.0252398	1
ENSG00000146535	5971	5716	4461	4295	4300	4642	4423.7	4730.69	4476.89	4805.82	4654.15	5117.83	1518.87	1624.27	1537.13	1650.07	1597.99	1757.19	41.9014	44.3874	42.4153	45.5952	43.89	47.8225	7	2728105	2844308	2912.5	GNA12	protein_coding	G protein subunit alpha 12	G protein-coupled receptor signaling pathway; signal transduction; Rho protein signal transduction; regulation of proteasomal ubiquitin-dependent protein catabolic process; adenylate cyclase-modulating G protein-coupled receptor signaling pathway; blood coagulation; regulation of TOR signaling; positive regulation of phosphoprotein phosphatase activity; in utero embryonic development; regulation …	GTPase activity; G-protein beta/gamma-subunit complex binding; G protein-coupled receptor binding; guanyl nucleotide binding; metal ion binding; nucleotide binding; GTP binding; protein phosphatase regulator activity; protein binding; protein phosphatase 2A binding; D5 dopamine receptor binding	cytoplasm; membrane; plasma membrane; focal adhesion; neuron projection; lateral plasma membrane; heterotrimeric G-protein complex; neuronal cell body; brush border membrane	0.000249745	0.0967893	0.0252752	1
ENSG00000272631	94	77	61	74	73	103	69.6412	63.7269	61.2172	82.801	79.0124	113.558	10.6404	9.73673	9.35328	12.651	12.0722	17.3503	0.293539	0.266081	0.258093	0.349578	0.33157	0.472195	10	86749754	86756298	6545		lncRNA	novel transcript, antisense to BMPR1A				1.0551e-05	0.497496	0.0253217	1
ENSG00000144736	1054	932	740	720	832	772	780.87	771.343	742.635	805.632	900.525	851.134	571.857	564.88	543.856	589.99	659.483	623.313	15.776	15.4368	15.0071	16.3028	18.1132	16.9636	3	72749277	72861914	1365.5	SHQ1	protein_coding	SHQ1, H/ACA ribonucleoprotein assembly factor	box H/ACA snoRNP assembly; positive regulation of telomerase RNA localization to Cajal body; positive regulation of apoptotic process; negative regulation of rRNA processing; ribonucleoprotein complex assembly	protein binding; unfolded protein binding	nucleus; cytoplasm; nucleoplasm; cytosol	3.34618e-05	0.15528	0.0254696	1
ENSG00000142528	589	514	378	437	456	407	436.369	425.398	379.346	488.974	493.557	448.719	257.749	251.268	224.067	288.821	291.528	265.044	7.11059	6.86657	6.18288	7.9808	8.00701	7.21325	19	50025714	50053414	1693	ZNF473	protein_coding	zinc finger protein 473	regulation of DNA-templated transcription; positive regulation of transcription by RNA polymerase II; regulation of transcription by RNA polymerase II; mRNA 3'-end processing by stem-loop binding and cleavage	metal ion binding; DNA binding; protein binding; RNA polymerase II cis-regulatory region sequence-specific DNA binding; DNA-binding transcription activator activity, RNA polymerase II-specific	nucleoplasm; nucleus; Cajal body	2.02936e-05	0.201887	0.0254915	1
ENSG00000142627	1940	1975	1568	1502	1438	1725	1437.28	1634.55	1573.58	1680.64	1556.44	1901.82	1721.29	1957.55	1884.53	2012.74	1863.99	2277.63	47.4856	53.4951	52.0014	55.6167	51.1959	61.9863	1	16124337	16156069	835	EPHA2	protein_coding	EPH receptor A2	protein phosphorylation; transmembrane receptor protein tyrosine kinase signaling pathway; phosphorylation; apoptotic process; cell adhesion; skeletal system development; blood vessel development; vasculogenesis; osteoblast differentiation; negative regulation of cytokine production; blood vessel endothelial cell proliferation involved in sprouting angiogenesis; inflammatory response; notochord f…	ATP binding; protein binding; protein kinase activity; ephrin receptor activity; protein tyrosine kinase activity; nucleotide binding; kinase activity; transferase activity; transmembrane receptor protein tyrosine kinase activity; cadherin binding; molecular function activator activity; virus receptor activity; growth factor binding	membrane; plasma membrane; cell projection; cell surface; focal adhesion; anchoring junction; lamellipodium; ruffle membrane; lamellipodium membrane; tight junction; receptor complex; leading edge membrane	8.66182e-06	0.146448	0.0257881	1
ENSG00000196455	2105	1910	1660	1357	1328	1317	1559.52	1580.76	1665.91	1518.39	1437.38	1452	2215.22	2245.39	2366.35	2156.81	2041.73	2062.5	61.112	61.3613	65.2967	59.5977	56.0774	56.1315	3	130678934	130746829	704	PIK3R4	protein_coding	phosphoinositide-3-kinase regulatory subunit 4	protein phosphorylation; macroautophagy; late endosome to vacuole transport; phosphorylation; protein targeting to vacuole; protein kinase B signaling; cellular response to glucose starvation; regulation of cytokinesis; autophagosome maturation; receptor catabolic process; protein targeting to lysosome; regulation of autophagy; regulation of macroautophagy; phosphatidylinositol-3-phosphate biosyn…	ATP binding; protein binding; protein serine/threonine kinase activity; protein kinase activity; nucleotide binding; kinase activity; transferase activity; protein serine kinase activity	membrane; cytoplasmic vesicle; intracellular membrane-bounded organelle; endosome; late endosome; intracellular organelle; microtubule cytoskeleton; autophagosome; axoneme; cytosol; phosphatidylinositol 3-kinase complex, class III, type I; phosphatidylinositol 3-kinase complex, class III, type II; phagocytic vesicle membrane; phosphatidylinositol 3-kinase complex; phosphatidylinositol 3-kinase co…	-4.63745e-05	-0.123677	0.0258019	1
ENSG00000092445	980	898	704	749	745	718	726.046	743.204	706.507	838.081	806.359	791.598	848.185	868.229	825.359	979.066	942.008	924.764	23.3991	23.7266	22.7748	27.0539	25.8729	25.1677	15	41557675	41583589	856	TYRO3	protein_coding	TYRO3 protein tyrosine kinase	protein phosphorylation; phosphorylation; signal transduction; cell adhesion; platelet activation; viral entry into host cell; spermatogenesis; nervous system development; negative regulation of inflammatory response; cell migration; negative regulation of innate immune response; negative regulation of neuron apoptotic process; platelet aggregation; ovulation cycle; protein kinase B signaling; pr…	ATP binding; protein binding; protein kinase activity; protein tyrosine kinase activity; nucleotide binding; transmembrane receptor protein tyrosine kinase activity; kinase activity; transferase activity; virus receptor activity; phosphatidylinositol 3-kinase binding	membrane; plasma membrane; nucleus; endoplasmic reticulum membrane; nuclear envelope; cell surface; receptor complex	3.21481e-05	0.162127	0.0258429	1
ENSG00000229771	0	1	0	2	2	6	0	0.827622	0	2.23787	2.16472	6.61503	0	0.495879	0	1.34084	1.29702	3.96347	0	0.0135512	0	0.0370506	0.0356235	0.107867	20	40696499	40698616	1669		lncRNA	novel transcript				1.56262e-06	3.59093	0.0261488	1
ENSG00000148180	17428	16058	13231	12178	12601	12690	12911.8	13289.9	13278.1	13626.4	13638.8	13990.8	5141.06	5291.64	5286.93	5425.59	5430.55	5570.69	141.828	144.608	145.887	149.922	149.154	151.608	9	121207794	121332843	2511.5	GSN	protein_coding	gelsolin	cell projection organization; actin filament capping; actin filament severing; cilium assembly; protein destabilization; positive regulation of gene expression; actin filament organization; central nervous system development; actin filament polymerization; positive regulation of cysteine-type endopeptidase activity involved in apoptotic signaling pathway; negative regulation of viral entry into h…	actin filament binding; metal ion binding; actin binding; calcium ion binding; protein binding; phosphatidylinositol-4,5-bisphosphate binding; phosphatidylinositol 3-kinase catalytic subunit binding; myosin II binding	nucleus; cytoplasm; extracellular region; plasma membrane; cytoskeleton; focal adhesion; cytosol; podosome; extracellular space; extracellular exosome; blood microparticle; actin cytoskeleton; secretory granule lumen; ficolin-1-rich granule lumen; cortical actin cytoskeleton; sarcoplasm; actin cap; lamellipodium; phagocytic vesicle	0.000984024	0.0636879	0.0263918	1
ENSG00000173559	5730	4514	3945	3403	3561	2951	4245.15	3735.88	3959.05	3807.73	3854.29	3253.49	1610.76	1417.52	1502.2	1444.78	1462.45	1234.49	44.4364	38.7375	41.4515	39.9228	40.1672	33.5969	2	191678068	191741097	2635.5	NABP1	protein_coding	nucleic acid binding protein 1	DNA repair; cellular response to DNA damage stimulus; response to ionizing radiation; double-strand break repair via homologous recombination; mitotic G2/M transition checkpoint	DNA binding; protein binding; single-stranded DNA binding; RNA binding	chromosome, telomeric region; nucleus; nucleoplasm; cytosol; site of double-strand break; SOSS complex	-3.32522e-05	-0.129749	0.026492	1
ENSG00000291237	12292	10865	8962	9016	8642	8494	9106.69	8992.11	8993.91	10088.3	9353.77	9364.67	11173.9	11033.3	11035.5	12378.3	11477	11490.4	308.256	301.513	304.511	342.041	315.224	312.715	6	159669069	159762529	815	SOD2	protein_coding	superoxide dismutase 2	superoxide metabolic process; regulation of transcription by RNA polymerase II; reactive oxygen species metabolic process; response to reactive oxygen species; response to superoxide; response to hypoxia; release of cytochrome c from mitochondria; liver development; detection of oxygen; acetylcholine-mediated vasodilation involved in regulation of systemic arterial blood pressure; glutathione met…	metal ion binding; superoxide dismutase activity; oxidoreductase activity; protein binding; manganese ion binding; identical protein binding; DNA binding; oxygen binding; enzyme binding	mitochondrion; mitochondrial matrix; mitochondrial nucleoid; extracellular exosome	0.000101555	0.0883746	0.0264966	1
ENSG00000273270	419	305	254	191	226	200	310.422	252.425	254.904	213.716	244.614	220.501	44.0065	35.7846	36.1362	30.2972	34.6773	31.259	1.21402	0.977908	0.997135	0.837182	0.952436	0.850722	7	128524016	128531069	7054	LINC03072	lncRNA	long intergenic non-protein coding RNA 3072				-1.83239e-05	-0.272284	0.0267995	1
ENSG00000133612	4778	4238	3435	3253	3423	3427	3539.85	3507.46	3447.23	3639.89	3704.92	3778.28	5860.67	5807.05	5707.34	6026.31	6133.98	6255.44	161.68	158.693	157.487	166.521	168.474	170.243	7	151085831	151144436	604	AGAP3	protein_coding	ArfGAP with GTPase domain, ankyrin repeat and PH domain 3	proteasome-mediated ubiquitin-dependent protein catabolic process; cellular response to reactive oxygen species	protein binding; GTPase activity; GTP binding; GTPase activator activity; metal ion binding; nucleotide binding; polyubiquitin modification-dependent protein binding	nucleus; cytoplasm; cell periphery	-0.000910684	0.0834656	0.0268314	1
ENSG00000197157	25063	22589	18940	17624	17752	17900	18568.3	18695.1	19007.4	19720.1	19214.1	19734.8	31876.8	32094.7	32630.8	33854.2	32985.5	33879.5	879.396	877.071	900.409	935.472	905.97	922.042	7	127652194	128092609	582.5	SND1	protein_coding	staphylococcal nuclease and tudor domain containing 1	RNA-mediated gene silencing; regulation of DNA-templated transcription; osteoblast differentiation; miRNA catabolic process; mRNA catabolic process; regulation of cell cycle process	nucleic acid binding; nuclease activity; RNA binding; hydrolase activity; protein binding; endonuclease activity; endoribonuclease activity; endonuclease activity, active with either ribo- or deoxyribonucleic acids and producing 3'-phosphomonoesters; cadherin binding; transcription coregulator activity; RISC complex binding	RISC complex; nucleus; cytoplasm; membrane; cytosol; melanosome; dense body; extracellular exosome	-2.22637e-05	0.0603428	0.0270389	1
ENSG00000123908	2592	2397	2007	1912	2083	1845	1920.32	1983.81	2014.15	2139.4	2254.56	2034.12	3707.18	3829.75	3888.31	4130.12	4352.43	3926.87	102.271	104.658	107.294	114.125	119.542	106.871	8	140520156	140635633	518	AGO2	protein_coding	argonaute RISC catalytic component 2	regulation of DNA-templated transcription; RNA-mediated gene silencing; translation; regulation of translation; negative regulation of translational initiation; positive regulation of nuclear-transcribed mRNA catabolic process, deadenylation-dependent decay; translational initiation; positive regulation of nuclear-transcribed mRNA poly(A) tail shortening; miRNA-mediated gene silencing by inhibiti…	protein binding; nucleic acid binding; endoribonuclease activity, cleaving siRNA-paired mRNA; miRNA binding; RNA binding; translation initiation factor activity; metal ion binding; hydrolase activity; endonuclease activity; nuclease activity; mRNA 3'-UTR AU-rich region binding; regulatory RNA binding; RNA 7-methylguanosine cap binding; endoribonuclease activity; double-stranded RNA binding; singl…	RISC complex; cytoplasm; nucleus; membrane; cytosol; ribonucleoprotein complex; cytoplasmic ribonucleoprotein granule; P-body; nucleoplasm; mRNA cap binding complex; RISC-loading complex; polysome; extracellular exosome; dendrite	4.01836e-05	0.120022	0.0270838	1
ENSG00000176542	1471	1310	1130	889	924	922	1089.81	1084.18	1134.02	994.731	1000.1	1016.51	129.293	128.626	134.538	118.013	118.65	120.597	3.56684	3.51503	3.71243	3.26098	3.25881	3.28207	3	113648385	113696646	8429	USF3	protein_coding	upstream transcription factor family member 3	positive regulation of transcription by RNA polymerase II; negative regulation of epithelial to mesenchymal transition	protein dimerization activity; DNA binding; RNA polymerase II transcription regulatory region sequence-specific DNA binding; DNA-binding transcription activator activity, RNA polymerase II-specific	nucleus	-3.13113e-05	-0.13453	0.0270955	1
ENSG00000138031	2737	2368	1923	1850	1973	1947	2027.74	1959.81	1929.85	2070.03	2135.5	2146.58	2268.17	2192.18	2158.67	2315.47	2388.7	2401.09	62.5726	59.907	59.5659	63.9818	65.6073	65.3464	2	24819169	24920237	894	ADCY3	protein_coding	adenylate cyclase 3	intracellular signal transduction; cyclic nucleotide biosynthetic process; cAMP biosynthetic process; response to stimulus; sensory perception of smell; single fertilization; flagellated sperm motility; adenylate cyclase-activating G protein-coupled receptor signaling pathway; signal transduction; cellular response to forskolin; acrosome reaction; olfactory learning	adenylate cyclase activity; phosphorus-oxygen lyase activity; metal ion binding; nucleotide binding; ATP binding; lyase activity; calmodulin binding	plasma membrane; cytoplasm; membrane; cell projection; Golgi apparatus; cilium; ciliary membrane	0.000111962	0.101323	0.0271152	1
ENSG00000136238	12762	11824	9206	8722	9406	9067	9454.9	9785.8	9238.78	9759.33	10180.7	9996.41	10424.4	10789.2	10186.1	10760	11224.6	11021.4	287.58	294.843	281.073	297.325	308.291	299.951	7	6374527	6403967	907	RAC1	protein_coding	Rac family small GTPase 1	small GTPase mediated signal transduction; positive regulation of protein phosphorylation; inflammatory response; regulation of cell migration; cell migration; actin filament organization; regulation of cell shape; actin filament polymerization; cell adhesion; negative regulation of interleukin-23 production; lamellipodium assembly; response to wounding; positive regulation of endothelial cell mi…	GTPase activity; GTP binding; protein binding; nucleotide binding; hydrolase activity; G protein activity; protein kinase binding; protein-containing complex binding; thioesterase binding; enzyme binding; Rho GDP-dissociation inhibitor binding	nucleus; cytoplasm; membrane; cell projection; plasma membrane; focal adhesion; cytosol; dendrite; recycling endosome membrane; synapse; melanosome; lamellipodium; ruffle membrane; cytoskeleton; endoplasmic reticulum membrane; extracellular exosome; cytoplasmic vesicle; secretory granule membrane; actin filament; glutamatergic synapse; cytoplasmic ribonucleoprotein granule; ficolin-1-rich granule…	5.78621e-05	0.0717385	0.0271187	1
ENSG00000182118	171	166	128	137	145	163	126.688	137.385	128.456	153.294	156.942	179.708	84.2899	91.4073	85.4663	101.992	104.419	119.566	2.32533	2.49794	2.35834	2.81828	2.86795	3.25403	1	231018958	231040254	1503	FAM89A	protein_coding	family with sequence similarity 89 member A				1.5831e-05	0.319846	0.0273217	1
ENSG00000168412	1	0	0	3	3	4	0.740863	0	0	3.3568	3.24708	4.41002	0.156946	0	0	0.711111	0.687869	0.934227	0.00432971	0	0	0.0196497	0.0188928	0.0254253	4	186526792	186555567	4720.5	MTNR1A	protein_coding	melatonin receptor 1A	G protein-coupled receptor signaling pathway; signal transduction; circadian rhythm; G protein-coupled receptor signaling pathway, coupled to cyclic nucleotide second messenger; adenylate cyclase-inhibiting G protein-coupled receptor signaling pathway; mating behavior	melatonin receptor activity; G protein-coupled receptor activity; protein binding; hormone binding; organic cyclic compound binding	membrane; plasma membrane; receptor complex	1.53718e-06	3.59057	0.0274412	1
ENSG00000117408	2966	2718	2214	2160	2114	2202	2197.4	2249.48	2221.88	2416.9	2288.11	2427.72	4386.03	4489.97	4434.9	4824.14	4567.09	4845.74	120.999	122.7	122.376	133.302	125.438	131.878	1	43946950	43968022	501	IPO13	protein_coding	importin 13	intracellular protein transport; protein transport; organic substance transport; nucleocytoplasmic transport; macromolecule localization; protein import into nucleus	small GTPase binding; protein binding	nucleus; cytoplasm	5.21732e-05	0.0970427	0.0274422	1
ENSG00000199012	0	0	0	6	0	1	0	0	0	6.7136	0	1.1025	0	0	0	73.7758	0	12.1154	0	0	0	2.0386	0	0.329725	14	101065447	101065537	91	MIR412	miRNA	microRNA 412	miRNA-mediated gene silencing			1.12797e-06	4.05249	0.0275413	1
ENSG00000160917	3419	2874	2406	2362	2448	2320	2533.01	2378.58	2414.57	2642.92	2649.62	2557.81	3400.02	3192.73	3241.03	3547.54	3556.54	3433.3	93.7972	87.2497	89.4325	98.027	97.6827	93.4383	7	99438922	99457373	745	CPSF4	protein_coding	cleavage and polyadenylation specific factor 4	pre-mRNA cleavage required for polyadenylation; mRNA processing; mRNA 3'-end processing	zinc ion binding; metal ion binding; RNA binding; nucleic acid binding; protein binding; sequence-specific double-stranded DNA binding	nucleus; intracellular membrane-bounded organelle; nucleoplasm; mRNA cleavage and polyadenylation specificity factor complex	5.95013e-05	0.0989783	0.0275943	1
ENSG00000172216	7112	7995	5689	6083	5836	6686	5269.02	6616.84	5709.26	6806.47	6316.66	7371.35	2865.16	3598.06	3104.54	3701.18	3434.83	4008.34	79.0419	98.3264	85.6663	102.272	94.3401	109.088	20	50190830	50192668	1839	CEBPB	protein_coding	CCAAT enhancer binding protein beta	regulation of DNA-templated transcription; DNA-templated transcription; negative regulation of transcription by RNA polymerase II; cell differentiation; regulation of transcription by RNA polymerase II; defense response to bacterium; response to endoplasmic reticulum stress; positive regulation of transcription by RNA polymerase II; inflammatory response; immune response; positive regulation of i…	DNA-binding transcription factor activity; protein binding; DNA binding; protein homodimerization activity; DNA-binding transcription factor activity, RNA polymerase II-specific; RNA polymerase II cis-regulatory region sequence-specific DNA binding; sequence-specific double-stranded DNA binding; DNA-binding transcription repressor activity, RNA polymerase II-specific; transcription cis-regulatory…	nucleus; cytoplasm; nucleoplasm; chromatin; RNA polymerase II transcription regulator complex; condensed chromosome, centromeric region; nuclear matrix; CHOP-C/EBP complex; C/EBP complex	1.69482e-05	0.220094	0.0277113	1
ENSG00000164932	956	733	659	534	572	466	708.265	606.647	661.347	597.51	619.111	513.767	800.752	685.864	747.707	675.534	699.956	580.856	22.0906	18.743	20.6321	18.6666	19.2248	15.8082	8	103371538	103382989	884.5	CTHRC1	protein_coding	collagen triple helix repeat containing 1	osteoblast differentiation; osteoblast proliferation; positive regulation of osteoblast proliferation; ossification involved in bone remodeling; positive regulation of osteoblast differentiation; Wnt signaling pathway, planar cell polarity pathway; inner ear receptor cell stereocilium organization; negative regulation of canonical Wnt signaling pathway; cochlea morphogenesis; establishment of pla…	extracellular matrix structural constituent; frizzled binding; Wnt-protein binding	extracellular region; collagen trimer; extracellular space; collagen-containing extracellular matrix; sarcoplasm	-3.2727e-05	-0.192406	0.0277653	1
ENSG00000137501	3084	2475	2089	1744	1927	1694	2284.82	2048.36	2096.44	1951.42	2085.71	1867.64	1304.87	1169.83	1197.28	1114.46	1191.15	1066.62	35.9977	31.9685	33.0376	30.7952	32.7158	29.0282	11	85694224	85811159	1751	SYTL2	protein_coding	synaptotagmin like 2	intracellular protein transport; exocytosis; vesicle-mediated transport; vesicle docking involved in exocytosis	small GTPase binding; protein binding; phosphatase binding; phosphatidylinositol-4,5-bisphosphate binding; phosphatidylserine binding; neurexin family protein binding	cytoplasm; membrane; plasma membrane; melanosome; exocytic vesicle	-4.42955e-05	-0.123698	0.0277898	1
ENSG00000229873	9	8	6	0	2	1	6.66777	6.62097	6.02137	0	2.16472	1.1025	6.39901	6.3541	5.77866	0	2.07747	1.05807	0.176531	0.173642	0.159455	0	0.0570591	0.0287956	20	62800627	62805961	1042	OGFR-AS1	lncRNA	OGFR antisense RNA 1				-2.26992e-06	-2.55391	0.0278126	1
ENSG00000163364	155	112	70	126	109	106	114.834	92.6936	70.2493	140.986	117.977	116.865	81.5581	65.8335	49.8929	100.132	83.7908	83.0011	2.24997	1.79907	1.37674	2.76688	2.30137	2.2589	2	176611437	176637931	1408	LINC01116	lncRNA	long intergenic non-protein coding RNA 1116				1.18905e-05	0.423775	0.0278306	1
ENSG00000244754	3757	3302	2999	2423	2476	2295	2783.42	2732.81	3009.68	2711.17	2679.93	2530.25	1134.24	1113.61	1226.44	1104.8	1092.06	1031.07	31.2906	30.4324	33.8421	30.5282	29.9943	28.0609	13	32432417	32538885	2454	N4BP2L2	protein_coding	NEDD4 binding protein 2 like 2	negative regulation of transcription by RNA polymerase II; positive regulation of hematopoietic stem cell proliferation; negative regulation of hematopoietic stem cell differentiation; in utero embryonic development; blastocyst development	enzyme binding; protein binding; transcription corepressor activity	nucleus; extracellular exosome; transcription repressor complex; membrane	-4.80093e-05	-0.10484	0.0278714	1
ENSG00000151746	592	531	410	418	502	420	438.591	439.467	411.46	467.714	543.345	463.052	301.334	301.935	282.693	321.342	373.305	318.139	8.31298	8.25118	7.80059	8.87945	10.2531	8.65826	12	32106835	32383633	1455.5	BICD1	protein_coding	BICD cargo adaptor 1	anatomical structure morphogenesis; positive regulation of receptor-mediated endocytosis; regulation of microtubule cytoskeleton organization; RNA processing; minus-end-directed organelle transport along microtubule; positive regulation of protein localization to centrosome; protein localization to organelle; stress granule assembly; microtubule anchoring at microtubule organizing center; intrace…	cytoskeletal anchor activity; dynein complex binding; protein binding; structural constituent of cytoskeleton; small GTPase binding; dynein intermediate chain binding; protein kinase binding; dynactin binding; proteinase activated receptor binding	Golgi apparatus; cytoskeleton; cytosol; perinuclear region of cytoplasm; cytoplasmic vesicle; membrane; cytoplasmic microtubule; trans-Golgi network; centrosome; secretory vesicle	5.22541e-05	0.191643	0.0279237	1
ENSG00000207956	0	0	0	3	1	3	0	0	0	3.3568	1.08236	3.30751	0	0	0	34.2531	11.0445	33.7501	0	0	0	0.946493	0.303345	0.91852	5	32394378	32394475	98	MIR579	miRNA	microRNA 579				1.12392e-06	4.04292	0.0280594	1
ENSG00000224232	5	4	3	0	0	0	3.70432	3.31049	3.01068	0	0	0	5.46359	4.88272	4.44053	0	0	0	0.150726	0.133433	0.122531	0	0	0	2	241478316	241478993	678	KCTD5P1	processed_pseudogene	KCTD5 pseudogene 1				-1.10729e-06	-4.04672	0.0280849	1
ENSG00000230479	46	53	27	10	21	23	34.0797	43.8639	27.0961	11.1893	22.7296	25.3576	38.1632	49.1198	30.3428	12.53	25.4531	28.396	1.05282	1.34233	0.837275	0.346235	0.699086	0.772805	21	36430360	36481070	893	LNCTSI	lncRNA	lncRNA TGF-beta/SMAD3 pathway interacting				-6.15312e-06	-0.828946	0.0281509	1
ENSG00000173153	1738	1638	1261	1320	1252	1294	1287.62	1355.64	1265.49	1476.99	1355.12	1426.64	854.71	899.863	840.02	980.413	899.513	946.99	23.5791	24.5911	23.1794	27.0911	24.7057	25.7726	11	64305497	64316743	1506.5	ESRRA	protein_coding	estrogen related receptor alpha	regulation of DNA-templated transcription; steroid hormone mediated signaling pathway; regulation of transcription by RNA polymerase II; positive regulation of transcription by RNA polymerase II; intracellular steroid hormone receptor signaling pathway	DNA binding; nuclear steroid receptor activity; zinc ion binding; steroid binding; DNA-binding transcription factor activity; sequence-specific DNA binding; metal ion binding; protein binding; DNA-binding transcription factor activity, RNA polymerase II-specific; protein domain specific binding; sequence-specific double-stranded DNA binding; nuclear receptor activity; estrogen response element bi…	nucleus; nucleoplasm; fibrillar center; intercellular bridge; microtubule cytoskeleton; cytoplasm; chromatin	3.0397e-05	0.122856	0.0282189	1
ENSG00000186889	275	217	177	135	139	139	203.737	179.594	177.63	151.056	150.448	153.248	95.3827	84.0795	83.1602	70.7191	70.4346	71.7454	2.63135	2.29769	2.29471	1.95413	1.93453	1.95257	2	62500218	62511894	2136	TMEM17	protein_coding	transmembrane protein 17	cell projection organization; cilium assembly; smoothened signaling pathway; non-motile cilium assembly	protein binding	membrane; cell projection; plasma membrane; cilium; ciliary membrane; ciliary transition zone; MKS complex	-1.64083e-05	-0.306194	0.0282957	1
ENSG00000159403	13184	12098	10278	9557	9782	9411	9767.54	10012.6	10314.6	10693.6	10587.7	10375.7	13343.6	13678.4	14091	14608.8	14464	14174.4	368.115	373.797	388.824	403.676	397.264	385.761	12	7080214	7092540	732	C1R	protein_coding	complement C1r	proteolysis; complement activation; immune system process; innate immune response	calcium ion binding; serine-type endopeptidase activity; peptidase activity; hydrolase activity; serine-type peptidase activity	extracellular region	7.92675e-05	0.0734365	0.0286363	1
ENSG00000161682	403	378	293	296	327	341	298.568	312.841	294.043	331.204	353.932	375.954	294.156	308.218	289.698	326.31	348.702	370.398	8.11496	8.42286	7.99388	9.0167	9.57733	10.0805	17	44353215	44363853	1015	FAM171A2	protein_coding	family with sequence similarity 171 member A2			membrane	2.18162e-05	0.228332	0.028645	1
ENSG00000136982	564	481	347	385	456	398	417.847	398.086	348.236	430.789	493.557	438.797	288.071	274.447	240.08	296.994	340.267	302.514	7.9471	7.49999	6.62472	8.20663	9.34565	8.23301	8	119833976	119855894	1450.5	DSCC1	protein_coding	DNA replication and sister chromatid cohesion 1	mitotic sister chromatid cohesion; cell cycle; DNA duplex unwinding; DNA replication; regulation of DNA replication; positive regulation of DNA-directed DNA polymerase activity; post-translational protein acetylation; maintenance of mitotic sister chromatid cohesion	DNA binding; protein binding; single-stranded DNA helicase activity; DNA clamp loader activity	Ctf18 RFC-like complex; nucleus; chromatin; nucleoplasm; chromosome, centromeric region	1.33574e-05	0.223964	0.0287334	1
ENSG00000084112	5530	5241	4301	4055	4145	4062	4096.98	4337.57	4316.32	4537.27	4486.39	4478.37	6555.16	6940.1	6906.1	7259.64	7178.22	7165.4	180.839	189.657	190.566	200.601	197.155	195.008	12	108778191	108857590	625	SSH1	protein_coding	slingshot protein phosphatase 1	protein dephosphorylation; dephosphorylation; negative regulation of actin filament polymerization; actin cytoskeleton organization; cell morphogenesis; cellular response to ATP; regulation of protein metabolic process; positive regulation of synaptic plasticity; excitatory chemical synaptic transmission; positive regulation of AMPA glutamate receptor clustering; positive regulation of vascular a…	phosphatase activity; protein tyrosine/serine/threonine phosphatase activity; actin binding; hydrolase activity; protein serine/threonine phosphatase activity; phosphoprotein phosphatase activity; myosin phosphatase activity; protein binding; protein tyrosine phosphatase activity	cytoplasm; cell projection; plasma membrane; cytoskeleton; synapse; midbody; lamellipodium; cleavage furrow; growth cone; cell leading edge; membrane	6.25483e-05	0.0832161	0.0287378	1
ENSG00000100241	7237	6636	5474	5086	5239	5410	5361.63	5492.1	5493.49	5690.89	5670.49	5964.55	1844.39	1889.27	1889.75	1957.65	1950.63	2051.79	50.8816	51.6291	52.1453	54.0945	53.5755	55.84	22	50443219	50483923	2907	SBF1	protein_coding	SET binding factor 1	protein dephosphorylation; spermatogenesis; spermatid development	guanyl-nucleotide exchange factor activity; protein tyrosine/serine/threonine phosphatase activity	cytoplasm; membrane; nuclear body; perinuclear region of cytoplasm; endoplasmic reticulum membrane; cytosol	5.99812e-05	0.0841159	0.0289338	1
ENSG00000143977	2781	2445	1801	1559	1688	1669	2060.34	2023.53	1807.41	1744.42	1827.03	1840.08	4000.66	3929.19	3509.54	3387.22	3547.62	3572.97	110.367	107.376	96.8417	93.5968	97.4379	97.2394	2	70281362	70293740	515	SNRPG	protein_coding	small nuclear ribonucleoprotein polypeptide G	spliceosomal snRNP assembly; mRNA processing; RNA splicing; mRNA splicing, via spliceosome; spliceosomal complex assembly; U2-type prespliceosome assembly; 7-methylguanosine cap hypermethylation	RNA binding; protein binding	spliceosomal complex; nucleus; cytoplasm; nucleoplasm; ribonucleoprotein complex; cytosol; intracellular organelle; catalytic step 2 spliceosome; U1 snRNP; U4/U6 x U5 tri-snRNP complex; U4 snRNP; P granule; methylosome; SMN-Sm protein complex; U2-type precatalytic spliceosome; U2-type catalytic step 2 spliceosome; U2 snRNP; U2-type prespliceosome; U12-type spliceosomal complex; precatalytic splic…	-3.86379e-05	-0.124416	0.029147	1
ENSG00000104880	4156	3722	2973	2903	2990	2929	3079.03	3080.41	2983.59	3248.26	3236.26	3229.24	570.613	570.869	552.926	601.976	599.752	598.45	15.7417	15.6005	15.2573	16.634	16.4726	16.287	19	7348937	7472485	5396	ARHGEF18	protein_coding	Rho/Rac guanine nucleotide exchange factor 18	small GTPase mediated signal transduction; regulation of Rho protein signal transduction; protein localization to cell-cell junction; actin cytoskeleton organization; negative regulation of stress fiber assembly; regulation of cell shape	guanyl-nucleotide exchange factor activity; metal ion binding; protein binding	cytoplasm; membrane; cytosol; plasma membrane; cytoskeleton; apical plasma membrane; extracellular exosome; cell junction; apical part of cell	6.07308e-05	0.0867107	0.0292029	1
ENSG00000189233	4	3	2	0	0	0	2.96345	2.48287	2.00712	0	0	0	1.37707	1.15375	0.932677	0	0	0	0.0379896	0.0315292	0.0257361	0	0	0	8	28021964	28083936	2152	NUGGC	protein_coding	nuclear GTPase, germinal center associated	negative regulation of apoptotic process; cellular response to lipopolysaccharide; regulation of nuclear cell cycle DNA replication	nucleotide binding; hydrolase activity; GTP binding; GTPase activity	nucleus; nuclear speck	-1.3123e-06	-3.62485	0.0292105	1
ENSG00000213676	4012	3644	3063	2912	3037	2802	2972.34	3015.85	3073.91	3258.33	3287.13	3089.22	2707.05	2746.68	2799.55	2967.52	2993.74	2813.5	74.6802	75.0602	77.2504	81.9995	82.2252	76.5701	6	32115264	32128253	1098	ATF6B	protein_coding	activating transcription factor 6 beta	regulation of DNA-templated transcription; response to unfolded protein; regulation of transcription by RNA polymerase II; positive regulation of transcription by RNA polymerase II; signal transduction; ATF6-mediated unfolded protein response; positive regulation of transcription from RNA polymerase II promoter in response to endoplasmic reticulum stress; endoplasmic reticulum unfolded protein re…	DNA-binding transcription factor activity; DNA binding; protein binding; DNA-binding transcription factor activity, RNA polymerase II-specific; RNA polymerase II cis-regulatory region sequence-specific DNA binding; sequence-specific double-stranded DNA binding; DNA-binding transcription activator activity, RNA polymerase II-specific; transcription cis-regulatory region binding	nucleus; membrane; endoplasmic reticulum; endoplasmic reticulum membrane; chromatin; nucleoplasm; cytosol; Golgi membrane; RNA polymerase II transcription regulator complex; Golgi apparatus; protein-DNA complex	6.82028e-05	0.0890233	0.0293012	1
ENSG00000289138	21	9	14	3	6	5	15.5581	7.4486	14.0499	3.3568	6.49417	5.51252	9.42346	4.51157	8.5099	2.03319	3.93348	3.3389	0.259968	0.12329	0.234821	0.0561819	0.108036	0.0908691	3	19951702	19953352	1651		lncRNA	novel transcript, sense intronic to RAB5A				-4.13033e-06	-1.26723	0.0293349	1
ENSG00000236682	169	164	138	169	150	141	125.206	135.73	138.491	189.1	162.354	155.453	173.897	188.514	192.349	262.638	225.492	215.907	4.79735	5.15163	5.30765	7.25732	6.19329	5.87598	2	127388173	127406228	720	MAP3K2-DT	lncRNA	MAP3K2 divergent transcript				1.68385e-05	0.3458	0.0293877	1
ENSG00000165915	4594	4092	3339	3336	3279	3167	3403.53	3386.63	3350.89	3732.76	3549.06	3491.63	4115.51	4095.08	4051.86	4513.62	4291.49	4222.05	113.536	111.909	111.806	124.722	117.869	114.904	11	47407132	47416496	827	SLC39A13	protein_coding	solute carrier family 39 member 13	transmembrane transport; metal ion transport; monoatomic ion transport; zinc ion transport; zinc ion transmembrane transport; cellular zinc ion homeostasis; brown fat cell differentiation; connective tissue development	metal ion transmembrane transporter activity; protein binding; zinc ion transmembrane transporter activity; protein homodimerization activity	membrane; Golgi apparatus; cytoplasmic vesicle membrane; cytoplasmic vesicle; endoplasmic reticulum; endoplasmic reticulum membrane; Golgi membrane; perinuclear region of cytoplasm	5.62498e-05	0.0869074	0.0294204	1
ENSG00000180964	4724	4312	3548	2920	3002	3080	3499.84	3568.7	3560.63	3267.28	3249.25	3395.71	3094.46	3155.35	3148.22	2888.85	2872.9	3002.4	85.3679	86.2283	86.8714	79.8256	78.9061	81.7112	X	103252995	103255192	1131	TCEAL8	protein_coding	transcription elongation factor A like 8		protein binding	nucleus	-4.90619e-05	-0.100583	0.0294659	1
ENSG00000136810	10559	9578	7558	6624	6621	6848	7822.78	7926.96	7584.91	7411.81	7166.31	7549.95	12319.3	12483.4	11944.7	11672.1	11285.5	11889.7	339.857	341.142	329.601	322.529	309.965	323.581	9	110243810	110256507	635	TXN	protein_coding	thioredoxin	negative regulation of transcription by RNA polymerase II; cell redox homeostasis; negative regulation of protein export from nucleus; positive regulation of protein kinase B signaling; response to radiation; positive regulation of DNA binding; activation of protein kinase B activity; positive regulation of peptidyl-serine phosphorylation; cellular detoxification of hydrogen peroxide; response to…	protein-disulfide reductase activity; RNA binding; protein homodimerization activity; protein binding; thioredoxin-disulfide reductase activity; protein-disulfide reductase (NAD(P)) activity	nucleus; cytoplasm; extracellular region; nucleoplasm; cytosol; extracellular exosome	-6.41151e-05	-0.0769788	0.0295034	1
ENSG00000137601	2279	1978	1747	1444	1455	1360	1688.43	1637.04	1753.22	1615.74	1574.84	1499.41	417.205	404.506	433.215	399.244	389.137	370.498	11.5095	11.0542	11.9541	11.032	10.6879	10.0832	4	169369704	169612632	4047	NEK1	protein_coding	NIMA related kinase 1	protein phosphorylation; phosphorylation; cell division; cell cycle; cell projection organization; cilium assembly	ATP binding; protein kinase activity; metal ion binding; nucleotide binding; protein serine/threonine kinase activity; kinase activity; transferase activity; protein tyrosine kinase activity; protein binding; protein serine kinase activity; 14-3-3 protein binding	nucleus; cytoplasm; nucleoplasm; cytosol; cytoskeleton; centriolar satellite; centrosome; pericentriolar material	-4.2939e-05	-0.113981	0.0295735	1
ENSG00000188365	0	0	0	2	1	3	0	0	0	2.23787	1.08236	3.30751	0	0	0	2.97193	1.4374	4.39245	0	0	0	0.0821215	0.0394791	0.119542	7	5419846	5423122	753		lncRNA	novel transcript				1.20379e-06	3.81818	0.0296093	1
ENSG00000101152	9371	8331	6702	6403	6721	6464	6942.63	6894.92	6725.87	7164.53	7274.55	7126.59	1322.66	1313.57	1281.36	1364.93	1385.89	1357.7	36.4885	35.8967	35.3577	37.7163	38.0645	36.9503	20	63895126	63936031	5249	DNAJC5	protein_coding	DnaJ heat shock protein family (Hsp40) member C5	chaperone-mediated protein folding; synaptic vesicle exocytosis; exocytosis; negative regulation of neuron apoptotic process; regulated exocytosis; neuron apoptotic process; regulation of synaptic vesicle cycle	protein binding; ATP-dependent protein binding	cytoplasm; membrane; Golgi apparatus; cytoplasmic vesicle; intracellular membrane-bounded organelle; plasma membrane; mitochondrion; lysosomal membrane; cytosol; melanosome; specific granule membrane; presynapse; azurophil granule membrane; chromaffin granule membrane; clathrin-sculpted gamma-aminobutyric acid transport vesicle membrane; synaptic vesicle; synaptic vesicle membrane; neuromuscular …	-7.02727e-06	0.0682436	0.0296584	1
ENSG00000186310	294	181	195	148	136	123	217.814	149.8	195.694	165.602	147.201	135.608	83.7102	57.5709	75.2092	63.6442	56.5723	52.1169	2.30934	1.57328	2.07531	1.75864	1.5538	1.41838	X	93670930	93673578	2602	NAP1L3	protein_coding	nucleosome assembly protein 1 like 3	nucleosome assembly	protein binding; chromatin binding; histone binding	nucleus; chromatin	-1.14292e-05	-0.330718	0.0297251	1
ENSG00000137166	816	714	588	619	650	555	604.545	590.922	590.094	692.62	703.535	611.89	183.195	179.067	178.816	209.885	213.192	185.421	5.05386	4.89348	4.93423	5.79961	5.85547	5.04629	6	41546381	41602384	3300	FOXP4	protein_coding	forkhead box P4	regulation of DNA-templated transcription; negative regulation of transcription by RNA polymerase II; regulation of transcription by RNA polymerase II	DNA-binding transcription factor activity; sequence-specific DNA binding; metal ion binding; DNA binding; protein binding; RNA polymerase II cis-regulatory region sequence-specific DNA binding; DNA-binding transcription factor activity, RNA polymerase II-specific; DNA-binding transcription repressor activity, RNA polymerase II-specific	nucleus; chromatin	2.87034e-05	0.168943	0.0297637	1
ENSG00000185946	894	722	646	529	505	494	662.332	597.543	648.3	591.916	546.592	544.637	862.411	778.051	844.141	770.723	711.709	709.163	23.7916	21.2623	23.2931	21.2969	19.5476	19.3001	1	103525691	103555239	768	RNPC3	protein_coding	RNA binding region (RNP1, RRM) containing 3	mRNA processing; RNA splicing; mRNA splicing, via spliceosome	protein binding; RNA binding; nucleic acid binding; pre-mRNA intronic binding; U12 snRNA binding	nucleus; spliceosomal complex; nucleoplasm; U12-type spliceosomal complex	-2.71187e-05	-0.181343	0.0297738	1
ENSG00000139219	20	8	12	6	4	1	14.8173	6.62097	12.0427	6.7136	4.32945	1.1025	19.8357	8.86342	16.1215	8.98741	5.79578	1.47591	0.547213	0.242216	0.444853	0.248343	0.159185	0.0401673	12	47972967	48004554	747	COL2A1	protein_coding	collagen type II alpha 1 chain	visual perception; skeletal system development; collagen fibril organization; sensory perception of sound; cartilage condensation; ossification; tissue homeostasis; endochondral ossification; chondrocyte differentiation; heart morphogenesis; proteoglycan metabolic process; central nervous system development; regulation of gene expression; notochord development; limb morphogenesis; inner ear morph…	protein binding; extracellular matrix structural constituent; metal ion binding; extracellular matrix structural constituent conferring tensile strength; protein homodimerization activity; MHC class II protein binding; platelet-derived growth factor binding; identical protein binding; proteoglycan binding	extracellular region; collagen trimer; extracellular space; collagen-containing extracellular matrix; endoplasmic reticulum lumen; collagen type XI trimer; basement membrane; cytoplasm; extracellular matrix; collagen type II trimer	-3.52557e-06	-1.4686	0.029958	1
ENSG00000255135	392	289	248	159	212	201	290.418	239.183	248.883	177.91	229.461	221.603	419.983	345.89	359.918	257.282	331.83	320.468	11.5862	9.45234	9.93151	7.1093	9.11394	8.72162	11	76435559	76444690	691.5	EMSY-DT	lncRNA	EMSY divergent transcript				-1.05837e-05	-0.309419	0.0300175	1
ENSG00000140538	3	7	4	0	1	0	2.22259	5.79335	4.01424	0	1.08236	0	0.971837	2.53317	1.75524	0	0.473267	0	0.0268103	0.0692254	0.0484339	0	0.0129986	0	15	87859751	88256791	2287	NTRK3	protein_coding	neurotrophic receptor tyrosine kinase 3	protein phosphorylation; transmembrane receptor protein tyrosine kinase signaling pathway; positive regulation of gene expression; phosphorylation; signal transduction; cell differentiation; nervous system development; neurotrophin signaling pathway; heart development; positive regulation of cell population proliferation; positive regulation of cell migration; positive regulation of MAP kinase ac…	ATP binding; protein binding; protein kinase activity; transmembrane receptor protein tyrosine kinase activity; protein tyrosine kinase activity; neurotrophin receptor activity; nucleotide binding; kinase activity; transferase activity; p53 binding; neurotrophin binding	membrane; plasma membrane; axon; receptor complex	-1.66276e-06	-3.33953	0.0303762	1
ENSG00000011028	32958	30483	26067	23493	24499	24099	24417.4	25228.4	26159.8	26287.1	26516.8	26569.3	12058	12458.5	12918.4	12981.3	13094.7	13120.6	332.646	340.46	356.469	358.703	359.655	357.082	17	62627670	62693597	2025	MRC2	protein_coding	mannose receptor C type 2	collagen catabolic process; endocytosis; osteoblast differentiation	carbohydrate binding; protein binding; signaling receptor activity; collagen binding	membrane; focal adhesion	0.000557401	0.0666049	0.0307667	1
ENSG00000291140	134	111	72	59	59	56	99.2757	91.866	72.2564	66.017	63.8593	61.7403	95.1828	88.0786	69.2775	63.2953	61.2266	59.1949	2.62584	2.40698	1.91163	1.749	1.68163	1.61101	17	64966550	64975630	1043	AMZ2P1	lncRNA	AMZ2 pseudogene 1				-1.04589e-05	-0.466719	0.0308149	1
ENSG00000105520	3105	2966	2445	2349	2286	2392	2300.38	2454.73	2453.71	2628.37	2474.28	2637.19	3112.83	3321.69	3320.31	3556.66	3348.14	3568.59	85.8745	90.7738	91.62	98.279	91.959	97.1203	19	11355386	11365698	739	PLPPR2	protein_coding	phospholipid phosphatase related 2	phospholipid metabolic process; signal transduction; phospholipid dephosphorylation	phosphatidate phosphatase activity; protein binding	membrane	4.69278e-05	0.10334	0.0308915	1
ENSG00000250451	54	48	55	63	67	49	40.0066	39.7258	55.1958	70.4928	72.5182	54.0227	95.4812	94.8111	131.732	168.241	173.074	128.933	2.63407	2.59096	3.635	4.64888	4.75361	3.50894	12	53999022	54000010	419	HOXC-AS1	lncRNA	HOXC cluster antisense RNA 1				7.85615e-06	0.556933	0.0311001	1
ENSG00000265559	0	0	0	4	3	1	0	0	0	4.47573	3.24708	1.1025	0	0	0	14.9191	10.8236	3.67502	0	0	0	0.41225	0.297278	0.100017	11	47557534	47557833	300	RN7SL652P	misc_RNA	RNA, 7SL, cytoplasmic 652, pseudogene				9.90723e-07	4.23234	0.0311129	1
ENSG00000169564	12489	11009	8397	8354	8750	8559	9252.64	9111.29	8426.9	9347.57	9470.66	9436.34	5357.64	5275.79	4879.5	5412.6	5483.88	5464.01	147.803	144.175	134.644	149.563	150.619	148.704	2	70087477	70089203	1727	PCBP1	protein_coding	poly(rC) binding protein 1	positive regulation of transcription by RNA polymerase II; viral RNA genome replication	RNA binding; nucleic acid binding; DNA binding; protein binding; mRNA binding; single-stranded DNA binding; cadherin binding; DNA-binding transcription factor activity, RNA polymerase II-specific; sequence-specific single stranded DNA binding	cytoplasm; nucleus; nuclear speck; membrane; nucleoplasm; cytosol; ribonucleoprotein complex; cytoplasmic ribonucleoprotein granule; extracellular exosome; postsynaptic density	7.23912e-05	0.0759714	0.031308	1
ENSG00000272186	18	7	10	3	4	1	13.3355	5.79335	10.0356	3.3568	4.32945	1.1025	41.0324	17.8257	30.8788	10.3286	13.3214	3.39232	1.13197	0.487134	0.852064	0.285404	0.36588	0.092323	11	119067374	119067698	325	VPS11-DT	lncRNA	VPS11 divergent transcript				-2.91066e-06	-1.73282	0.0313372	1
ENSG00000158669	4592	4150	3387	3209	3285	3331	3402.05	3434.63	3399.06	3590.66	3555.56	3672.44	3910.4	3947.85	3906.97	4127.19	4086.85	4221.2	107.877	107.885	107.808	114.044	112.248	114.881	8	41577187	41625001	870	GPAT4	protein_coding	glycerol-3-phosphate acyltransferase 4	lipid metabolic process; phosphatidylcholine biosynthetic process; phospholipid biosynthetic process; lipid biosynthetic process; CDP-diacylglycerol biosynthetic process; acyl-CoA metabolic process; phosphatidic acid biosynthetic process; lactation; triglyceride biosynthetic process; glandular epithelial cell maturation; fatty acid metabolic process; triglyceride metabolic process; mammary gland …	acyltransferase activity; O-acyltransferase activity; transferase activity; lysophosphatidic acid acyltransferase activity; 1-acylglycerol-3-phosphate O-acyltransferase activity; glycerol-3-phosphate O-acyltransferase activity; sn-1-glycerol-3-phosphate C16:0-DCA-CoA acyl transferase activity	membrane; endoplasmic reticulum; endoplasmic reticulum membrane	6.03137e-05	0.0798235	0.0315612	1
ENSG00000178803	3	3	0	7	5	7	2.22259	2.48287	0	7.83253	5.41181	7.71753	1.30972	1.46309	0	4.61552	3.18904	4.54775	0.0361315	0.0399828	0	0.127538	0.0875892	0.123768	22	24429206	24495074	1697	ADORA2A-AS1	lncRNA	ADORA2A antisense RNA 1				2.27603e-06	2.08765	0.0316527	1
ENSG00000263069	24	18	11	14	43	21	17.7807	14.8972	11.0392	15.6651	46.5415	23.1526	9.0029	7.54288	5.58945	7.93168	23.5653	11.7228	0.248366	0.206129	0.154234	0.219171	0.647238	0.31904	17	80351828	80415168	1975	RNF213-AS1	lncRNA	RNF213 antisense RNA 1				5.02635e-06	0.954916	0.0316948	1
ENSG00000167513	1189	945	828	814	953	779	880.887	782.102	830.948	910.811	1031.49	858.851	1198.49	1064.09	1130.54	1239.2	1403.39	1168.5	33.063	29.0789	31.196	34.242	38.545	31.8012	16	88803789	88809258	735	CDT1	protein_coding	chromatin licensing and DNA replication factor 1	regulation of DNA-templated DNA replication initiation; DNA replication preinitiation complex assembly; cell division; cell cycle; DNA replication; mitotic cell cycle; attachment of mitotic spindle microtubules to kinetochore; DNA replication checkpoint signaling; positive regulation of DNA replication; negative regulation of cell cycle; positive regulation of chromatin binding; negative regulati…	DNA binding; protein binding; chromatin binding; DNA polymerase binding	nucleus; nucleoplasm; chromosome; nuclear body; chromosome, centromeric region; kinetochore	3.21139e-05	0.167152	0.0317111	1
ENSG00000186111	4096	3725	3114	2914	2978	3031	3034.58	3082.89	3125.09	3260.57	3223.27	3341.69	1162.23	1180.73	1196.89	1248.78	1234.5	1279.85	32.0627	32.2666	33.0269	34.5068	33.9063	34.8315	19	3630183	3700468	2611	PIP5K1C	protein_coding	phosphatidylinositol-4-phosphate 5-kinase type 1 gamma	phosphatidylinositol metabolic process; phosphorylation; lipid metabolic process; actin cytoskeleton organization; cell adhesion; exocytosis; endocytosis; chemotaxis; phosphatidylinositol phosphate biosynthetic process; neutrophil chemotaxis; phagocytosis; membrane organization; clathrin-dependent endocytosis; phosphatidylinositol biosynthetic process; regulation of protein kinase B signaling; ce…	phosphatidylinositol phosphate kinase activity; nucleotide binding; ATP binding; kinase activity; transferase activity; phosphatidylinositol kinase activity; protein binding; 1-phosphatidylinositol-4-phosphate 5-kinase activity	nucleoplasm; cytosol; nucleus; cytoplasm; membrane; cell projection; plasma membrane; presynapse; focal adhesion; anchoring junction; adherens junction; endomembrane system; endosome membrane; ruffle membrane; phagocytic cup; uropod	3.7633e-05	0.088709	0.0318434	1
ENSG00000156873	1327	1155	978	934	961	1026	983.126	955.903	981.483	1045.08	1040.15	1131.17	866.954	842.948	865.505	921.59	917.239	997.504	23.9169	23.0358	23.8826	25.4657	25.1926	27.1474	16	30748293	30761176	1134	PHKG2	protein_coding	phosphorylase kinase catalytic subunit gamma 2	protein phosphorylation; glycogen biosynthetic process; phosphorylation; carbohydrate metabolic process; glycogen metabolic process; generation of precursor metabolites and energy; positive regulation of glycogen catabolic process; glycogen catabolic process	ATP binding; protein kinase activity; nucleotide binding; protein serine/threonine kinase activity; calmodulin binding; phosphorylase kinase activity; kinase activity; transferase activity; tau-protein kinase activity; protein binding; enzyme binding	phosphorylase kinase complex; cytosol	1.42439e-05	0.13928	0.031936	1
ENSG00000058063	3238	2846	2381	2186	2342	2393	2398.92	2355.41	2389.48	2445.99	2534.89	2638.29	1829.14	1795.97	1821.94	1865.03	1932.82	2011.66	50.461	49.0795	50.2744	51.5352	53.0861	54.7479	3	182793503	182921629	1311.5	ATP11B	protein_coding	ATPase phospholipid transporting 11B (putative)	lipid translocation; phospholipid transport; monoatomic ion transport; lipid transport; monoatomic ion transmembrane transport; phospholipid translocation; aminophospholipid transport	ATP binding; ATP hydrolysis activity; transporter activity; protein binding; ATPase-coupled intramembrane lipid transporter activity; magnesium ion binding; nucleotide binding; metal ion binding; monoatomic ion transmembrane transporter activity; phosphatidylserine floppase activity; phosphatidylethanolamine flippase activity	membrane; Golgi apparatus; endoplasmic reticulum; endosome; endomembrane system; recycling endosome membrane; recycling endosome; early endosome; nuclear inner membrane; plasma membrane; early endosome membrane; azurophil granule membrane; phospholipid-translocating ATPase complex	4.77875e-05	0.0930044	0.0319953	1
ENSG00000177370	2378	2267	1718	1662	1765	1832	1761.77	1876.22	1724.12	1859.67	1910.37	2019.79	553.669	589.635	541.835	584.433	600.367	634.754	15.2742	16.1133	14.9513	16.1493	16.4895	17.275	17	997129	1003671	3182	TIMM22	protein_coding	translocase of inner mitochondrial membrane 22	protein insertion into mitochondrial inner membrane; protein transport; protein transmembrane transport	protein binding; protein transmembrane transporter activity; mitochondrion targeting sequence binding; protein transporter activity	TIM22 mitochondrial import inner membrane insertion complex; membrane; mitochondrion; mitochondrial inner membrane	4.33505e-05	0.110087	0.0322842	1
ENSG00000247400	214	190	183	123	111	125	158.545	157.248	183.652	137.629	120.142	137.813	110.254	109.352	127.713	95.7085	83.5481	95.8366	3.0416	2.98833	3.5241	2.64465	2.2947	2.60822	13	95648711	95676973	1438	DNAJC3-DT	lncRNA	DNAJC3 divergent transcript				-1.43414e-05	-0.332847	0.0323462	1
ENSG00000077782	2994	2537	2060	2037	2148	2020	2218.15	2099.68	2067.34	2279.27	2324.91	2227.06	1145.14	1083.98	1067.29	1176.7	1200.26	1149.75	31.5914	29.6227	29.4505	32.515	32.9661	31.2907	8	38400215	38468834	1937	FGFR1	protein_coding	fibroblast growth factor receptor 1	phosphorylation; signal transduction; positive regulation of cell population proliferation; animal organ development; fibroblast growth factor receptor signaling pathway; protein phosphorylation; phosphatidylinositol-mediated signaling; cell migration; positive regulation of MAPK cascade; positive regulation of protein kinase B signaling; skeletal system development; protein autophosphorylation; …	nucleotide binding; protein kinase activity; ATP binding; kinase activity; transferase activity; protein tyrosine kinase activity; transmembrane receptor protein tyrosine kinase activity; fibroblast growth factor receptor activity; protein homodimerization activity; protein binding; heparin binding; identical protein binding; fibroblast growth factor binding; receptor-receptor interaction; SH2 do…	nucleus; membrane; cytoplasmic vesicle; plasma membrane; cytosol; vesicle; cytoplasm; extracellular region; receptor complex	3.3451e-05	0.0960969	0.0324552	1
ENSG00000123094	2283	2186	1847	1694	1692	1877	1691.39	1809.18	1853.58	1895.47	1831.36	2069.4	1551.02	1659.04	1699.75	1738.17	1679.37	1897.66	42.7885	45.3376	46.9026	48.0297	46.1251	51.6454	12	25958232	26079892	1090.5	RASSF8	protein_coding	Ras association domain family member 8	signal transduction	protein binding		4.2939e-05	0.115843	0.0325053	1
ENSG00000280177	0	0	1	2	3	5	0	0	1.00356	2.23787	3.24708	5.51252	0	0	0.361383	0.805857	1.16928	1.98506	0	0	0.00997195	0.0222677	0.032115	0.0540241	17	39165073	39167849	2777		TEC	TEC				8.64556e-07	3.58898	0.0325987	1
ENSG00000239388	1	0	0	4	3	3	0.740863	0	0	4.47573	3.24708	3.30751	0.36175	0	0	2.18542	1.58549	1.615	0.00997969	0	0	0.0603882	0.0435466	0.0439526	3	57268342	57292685	2048	ASB14	protein_coding	ankyrin repeat and SOCS box containing 14	intracellular signal transduction; protein ubiquitination	protein binding	cytosol	1.39422e-06	3.59219	0.0326834	1
ENSG00000181472	996	932	745	736	756	768	737.9	771.343	747.653	823.535	818.265	846.724	237.802	248.58	240.945	265.4	263.701	272.873	6.56032	6.7931	6.6486	7.33361	7.24274	7.42631	6	151364115	151391559	3103	ZBTB2	protein_coding	zinc finger and BTB domain containing 2	regulation of cytokine production; negative regulation of transcription by RNA polymerase II; regulation of immune system process	protein binding; metal ion binding; DNA binding; identical protein binding; RNA polymerase II cis-regulatory region sequence-specific DNA binding; DNA-binding transcription repressor activity, RNA polymerase II-specific; sequence-specific double-stranded DNA binding	nucleus; nucleoplasm	3.36172e-05	0.141076	0.0327586	1
ENSG00000259065	58	33	41	17	22	22	42.9701	27.3115	41.146	19.0219	23.8119	24.2551	66.8795	42.5082	64.0405	29.606	37.0614	37.7511	1.84502	1.16165	1.76712	0.818084	1.01792	1.02741	14	73787355	73803300	642.5	MIDEAS-AS1	lncRNA	MIDEAS antisense RNA 1				-6.5587e-06	-0.73045	0.0328104	1
ENSG00000153802	3	2	5	0	0	0	2.22259	1.65524	5.0178	0	0	0	3.91991	2.9193	8.84974	0	0	0	0.10814	0.0797775	0.244198	0	0	0	4	67820876	67884002	567	TMPRSS11D	protein_coding	transmembrane serine protease 11D	proteolysis; respiratory gaseous exchange by respiratory system	serine-type endopeptidase activity; peptidase activity; hydrolase activity; protein binding; serine-type peptidase activity	extracellular region; plasma membrane; membrane; extracellular exosome	-1.11928e-06	-3.8563	0.0328824	1
ENSG00000266824	7	1	3	0	0	0	5.18604	0.827622	3.01068	0	0	0	11.1528	1.77983	6.47459	0	0	0	0.307675	0.0486386	0.178659	0	0	0	17	8176812	8182812	465		lncRNA	novel transcript				-1.10149e-06	-3.89913	0.032908	1
ENSG00000072401	1040	912	757	587	655	632	770.498	754.791	759.696	656.814	708.947	696.783	384.384	376.548	378.995	327.67	353.678	347.609	10.6041	10.2902	10.4579	9.05428	9.71399	9.46029	10	58334979	58370751	2004.5	UBE2D1	protein_coding	ubiquitin conjugating enzyme E2 D1	protein ubiquitination; protein polyubiquitination; protein modification by small protein conjugation; positive regulation of protein polyubiquitination; ubiquitin-dependent protein catabolic process; proteasome-mediated ubiquitin-dependent protein catabolic process; negative regulation of TORC1 signaling; positive regulation of protein ubiquitination; protein K48-linked ubiquitination; negative …	nucleotide binding; ATP binding; transferase activity; ubiquitin-like protein transferase activity; ubiquitin conjugating enzyme activity; protein binding; ubiquitin-protein transferase activity; ubiquitin protein ligase binding; ubiquitin protein ligase activity	cytoplasm; nucleus; ubiquitin ligase complex; nucleoplasm; cytosol; protein-containing complex	-9.47211e-05	-0.147797	0.0329862	1
ENSG00000260942	201	160	150	98	121	84	148.914	132.419	150.534	109.655	130.966	92.6104	37.2284	33.1049	37.6335	27.4139	32.7414	23.1526	1.02703	0.904677	1.03845	0.75751	0.899266	0.630105	2	240582700	240586699	4000	CAPN10-DT	lncRNA	CAPN10 divergent transcript				-1.31946e-05	-0.372609	0.033111	1
ENSG00000134686	6010	5234	4304	3977	4394	4213	4452.59	4331.77	4319.33	4450	4755.9	4644.85	1747.48	1700.07	1695.18	1746.47	1866.52	1822.94	48.2083	46.4588	46.7766	48.259	51.2653	49.6118	1	33323623	33431095	2548	PHC2	protein_coding	polyhomeotic homolog 2	negative regulation of DNA-templated transcription; spermatogenesis	zinc ion binding; protein binding; metal ion binding; DNA binding; identical protein binding; chromatin binding; histone binding	nucleus; protein-containing complex; nucleoplasm; PcG protein complex; PRC1 complex; heterochromatin	0.000225083	0.0797062	0.0331804	1
ENSG00000172403	27030	23866	22341	17684	18611	16636	20025.5	19752	22420.6	19787.2	20143.8	18341.3	2954.06	2913.71	3307.35	2918.9	2971.5	2705.6	81.4944	79.6247	91.2626	80.656	81.6144	73.6337	4	118850688	119061247	6779	SYNPO2	protein_coding	synaptopodin 2	positive regulation of actin filament bundle assembly; positive regulation of cell migration; regulation of Rho-dependent protein serine/threonine kinase activity	protein binding; actin binding; 14-3-3 protein binding; filamin binding; alpha-actinin binding; muscle alpha-actinin binding	nucleus; cytoplasm; intracellular membrane-bounded organelle; nucleoplasm; cytosol; cytoskeleton; focal adhesion; anchoring junction; actin cytoskeleton; Z disc; stress fiber	-5.02724e-05	-0.0937651	0.0333133	1
ENSG00000000419	3527	3079	2603	2128	2249	2230	2613.03	2548.25	2612.27	2381.09	2434.23	2458.59	2070.54	2019.21	2069.94	1886.76	1928.87	1948.17	57.1207	55.1803	57.1177	52.1356	52.9777	53.0199	20	50934867	50959140	1262	DPM1	protein_coding	dolichyl-phosphate mannosyltransferase subunit 1, catalytic	protein glycosylation; dolichol metabolic process; GDP-mannose metabolic process; dolichol-linked oligosaccharide biosynthetic process; protein O-linked mannosylation; GPI anchor biosynthetic process; protein N-linked glycosylation via asparagine; protein mannosylation	transferase activity; glycosyltransferase activity; dolichyl-phosphate beta-D-mannosyltransferase activity; metal ion binding; protein binding; mannose binding; alcohol binding; dolichyl-phosphate-mannose-protein mannosyltransferase activity	endoplasmic reticulum; nucleus; membrane; endoplasmic reticulum membrane; dolichol-phosphate-mannose synthase complex	-4.92514e-05	-0.0957101	0.033371	1
ENSG00000123213	2208	1787	1492	1475	1575	1494	1635.83	1478.96	1497.31	1650.43	1704.72	1647.14	1183.67	1070.16	1083.44	1194.23	1233.52	1191.85	32.6541	29.2449	29.8962	32.9994	33.8794	32.4366	5	65722205	65871725	1382	NLN	protein_coding	neurolysin	proteolysis; G protein-coupled receptor signaling pathway; peptide metabolic process; regulation of gluconeogenesis; regulation of skeletal muscle fiber differentiation	metallopeptidase activity; metalloendopeptidase activity; metal ion binding; peptidase activity; hydrolase activity; peptide binding	cytoplasm; mitochondrion; cytosol; mitochondrial intermembrane space; extracellular region; plasma membrane	4.00712e-05	0.115714	0.0335715	1
ENSG00000104853	7896	7508	6063	5665	5852	5805	5849.86	6213.78	6084.59	6338.76	6333.98	6400.04	7676.98	8154.57	7985.03	8318.58	8312.31	8399	211.787	222.845	220.337	229.862	228.303	228.581	19	44954585	44993341	762	CLPTM1	protein_coding	CLPTM1 regulator of GABA type A receptor forward trafficking	cell differentiation; regulation of T cell differentiation in thymus	protein binding; GABA receptor binding	membrane; endomembrane system; plasma membrane; external side of plasma membrane	3.63683e-05	0.072069	0.0336326	1
ENSG00000257790	7	5	6	0	0	2	5.18604	4.13811	6.02137	0	0	2.20501	4.27539	3.41147	4.96403	0	0	1.81781	0.117946	0.0932272	0.136977	0	0	0.0494724	12	53153272	53154484	1213	EIF4A1P4	processed_pseudogene	eukaryotic translation initiation factor 4A1 pseudogene 4				-2.10794e-06	-2.79574	0.0336637	1
ENSG00000170027	24173	20845	16736	16133	16931	16223	17908.9	17251.8	16795.6	18051.7	18325.5	17885.9	4833.71	4656.35	4533.22	4872.27	4946.14	4827.51	133.349	127.247	125.089	134.632	135.849	131.382	7	76326799	76358991	3705	YWHAG	protein_coding	tyrosine 3-monooxygenase/tryptophan 5-monooxygenase activation protein gamma	negative regulation of TORC1 signaling; regulation of signal transduction; signal transduction; regulation of synaptic plasticity; negative regulation of protein kinase activity; cellular response to glucose starvation; protein targeting; cellular response to insulin stimulus; regulation of neuron differentiation	RNA binding; identical protein binding; protein binding; protein sequestering activity; insulin-like growth factor receptor binding; protein kinase C binding; protein kinase C inhibitor activity; protein domain specific binding; receptor tyrosine kinase binding; phosphoserine residue binding	cytoplasm; membrane; focal adhesion; cytosol; extracellular exosome; vesicle; synapse; presynapse	-0.000310562	0.062315	0.0337105	1
ENSG00000251348	46	40	42	20	19	20	34.0797	33.1049	42.1496	22.3787	20.5649	22.0501	20.0233	19.4506	24.7647	13.1484	12.0828	12.9554	0.552389	0.531538	0.683354	0.363323	0.331861	0.352585	5	95768999	95770700	1702	HSPD1P11	processed_pseudogene	heat shock protein family D (Hsp60) member 1 pseudogene 11				-6.35105e-06	-0.745006	0.0337212	1
ENSG00000136026	34489	30898	25580	23886	24270	24357	25551.6	25571.9	25671.1	26726.8	26268.9	26853.7	30748.1	30772.4	30891.8	32162.3	31611.2	32314.9	848.256	840.936	852.423	888.719	868.223	879.46	12	106237881	106304279	831	CKAP4	protein_coding	cytoskeleton associated protein 4		RNA binding; protein binding	cytoplasm; membrane; endoplasmic reticulum; endoplasmic reticulum membrane; plasma membrane; rough endoplasmic reticulum; cytoskeleton; perinuclear region of cytoplasm; lipid droplet; extracellular exosome; specific granule membrane; endoplasmic reticulum lumen; azurophil granule membrane; lamellar body	0.000252324	0.0562907	0.0337689	1
ENSG00000165997	1691	1555	1367	1033	1015	1175	1252.8	1286.95	1371.87	1155.86	1098.6	1295.44	174.728	179.491	191.334	161.208	153.221	180.675	4.82027	4.90507	5.27965	4.45454	4.20833	4.91713	10	18659431	18681639	7170	ARL5B	protein_coding	ADP ribosylation factor like GTPase 5B	intracellular protein transport; vesicle-mediated transport; protein localization to Golgi membrane	GTPase activity; GTP binding; nucleotide binding; protein binding	trans-Golgi network	-3.5366e-05	-0.13856	0.0337936	1
ENSG00000188729	4	0	7	0	0	0	2.96345	0	7.02493	0	0	0	0.931172	0	2.20736	0	0	0	0.0256885	0	0.0609096	0	0	0	3	191199241	191265615	3182.5	OSTN	protein_coding	osteocrin	cell differentiation; hormone-mediated signaling pathway; endochondral bone growth; cell surface receptor signaling pathway; negative regulation of osteoblast differentiation; negative regulation of glucose import; negative regulation of dendrite extension	hormone activity; signaling receptor binding	extracellular region; extracellular space	-1.02584e-06	-4.02175	0.0338788	1
ENSG00000281731	34	18	23	32	32	34	25.1894	14.8972	23.0819	35.8059	34.6356	37.4852	9.60509	5.68053	8.80149	13.6533	13.2071	14.2937	0.264978	0.155235	0.242867	0.377274	0.362741	0.389006	4	118664087	118685343	2622.5	METTL14-DT	lncRNA	METTL14 divergent transcript				5.96394e-06	0.772173	0.0339092	1
ENSG00000143179	5273	4618	3585	3589	3823	3526	3906.57	3821.96	3597.77	4015.85	4137.87	3887.43	4706.71	4604.77	4334.66	4838.37	4985.38	4683.65	129.845	125.837	119.61	133.696	136.927	127.467	1	165827614	165911618	830	UCK2	protein_coding	uridine-cytidine kinase 2	phosphorylation; organonitrogen compound metabolic process; UMP salvage; CTP salvage; CMP biosynthetic process	ATP binding; kinase activity; nucleotide binding; transferase activity; uridine kinase activity; identical protein binding; cytidine kinase activity	cytoplasm; cytosol	-0.000207343	0.0871679	0.0341394	1
ENSG00000188959	9	7	5	2	0	0	6.66777	5.79335	5.0178	2.23787	0	0	4.42894	3.84812	3.33298	1.48646	0	0	0.122182	0.10516	0.0919698	0.0410744	0	0	9	110190048	110208159	1505.5	C9orf152	protein_coding	chromosome 9 open reading frame 152		protein binding		-1.80247e-06	-2.98584	0.0341847	1
ENSG00000136197	9	5	3	9	9	16	6.66777	4.13811	3.01068	10.0704	9.74125	17.6401	3.82546	2.37413	1.7273	5.77762	5.58878	10.1205	0.105534	0.0648793	0.0476628	0.159649	0.1535	0.275433	7	42909273	42912305	1743	C7orf25	protein_coding	chromosome 7 open reading frame 25		protein binding		3.34341e-06	1.41112	0.0342776	1
ENSG00000183255	20867	19024	15410	14458	14633	15011	15459.6	15744.7	15464.9	16177.5	15838.2	16549.7	20476.3	20853.9	20483.3	21427.2	20977.7	21920.1	564.885	569.887	565.212	592.084	576.168	596.563	21	44849585	44873903	755	PTTG1IP	protein_coding	PTTG1 interacting protein	protein import into nucleus; positive regulation of protein ubiquitination; negative regulation of DNA damage response, signal transduction by p53 class mediator; negative regulation of intrinsic apoptotic signaling pathway by p53 class mediator	protein binding; p53 binding	nucleoplasm; nucleus; cytoplasm; membrane; extracellular exosome	8.13324e-05	0.0574092	0.0343308	1
ENSG00000189167	1	0	0	6	2	1	0.740863	0	0	6.7136	2.16472	1.1025	0.551443	0	0	4.9971	1.61126	0.820621	0.0152128	0	0	0.138082	0.0442542	0.0223334	13	32303699	32315363	1343.5	ZAR1L	protein_coding	zygote arrest 1 like	negative regulation of translation; cell differentiation; oocyte maturation; translation; oogenesis	RNA binding; metal ion binding; mRNA binding; mRNA 3'-UTR binding	cytoplasm; intracellular non-membrane-bounded organelle; cytoplasmic ribonucleoprotein granule	1.46979e-06	3.44541	0.0344529	1
ENSG00000066044	5080	4692	3636	3579	3711	3560	3763.59	3883.2	3648.95	4004.66	4016.64	3924.92	4276.8	4412.73	4146.53	4550.75	4564.37	4460.13	117.985	120.589	114.419	125.748	125.363	121.384	19	7958573	8005659	880	ELAVL1	protein_coding	ELAV like RNA binding protein 1	regulation of stem cell population maintenance; 3'-UTR-mediated mRNA stabilization; protein homooligomerization; mRNA stabilization; positive regulation of translation; protein import into nucleus; post-transcriptional gene silencing; negative regulation of miRNA-mediated gene silencing	RNA binding; nucleic acid binding; protein homodimerization activity; protein binding; mRNA 3'-UTR AU-rich region binding; mRNA 3'-UTR binding; protein kinase binding; double-stranded RNA binding; mRNA binding; miRNA binding; lncRNA binding	ribonucleoprotein complex; nucleus; cytoplasm; membrane; cytosol; nucleoplasm; P-body; cytoplasmic stress granule; endoplasmic reticulum; sarcoplasm; cytoplasmic vesicle; postsynapse; glutamatergic synapse	3.96249e-05	0.0801251	0.0344633	1
ENSG00000226510	2	3	3	0	0	0	1.48173	2.48287	3.01068	0	0	0	1.83382	3.07285	3.72609	0	0	0	0.0505901	0.0839737	0.102817	0	0	0	19	35667948	35673304	808	UPK1A-AS1	lncRNA	UPK1A antisense RNA 1				-1.27298e-06	-3.50606	0.0345118	1
ENSG00000107165	10	16	5	1	2	3	7.40863	13.2419	5.0178	1.11893	2.16472	3.30751	9.3899	16.7832	6.3597	1.41817	2.74363	4.19203	0.259042	0.458645	0.175489	0.0391873	0.0753556	0.114087	9	12685439	12710285	789	TYRP1	protein_coding	tyrosinase related protein 1	melanin biosynthetic process; melanosome organization; melanocyte differentiation; melanin metabolic process; acetoacetic acid metabolic process; pigmentation; positive regulation of melanin biosynthetic process	oxidoreductase activity; metal ion binding; monooxygenase activity; protein homodimerization activity; protein binding; tyrosinase activity; identical protein binding	cytoplasm; membrane; cytoplasmic vesicle; endosome membrane; melanosome; melanosome membrane; intracellular vesicle; clathrin-coated endocytic vesicle membrane	-2.42934e-06	-1.96703	0.0345291	1
ENSG00000100416	2045	1778	1484	1419	1550	1447	1515.07	1471.51	1489.28	1587.77	1677.66	1595.32	1053.23	1022.95	1035.3	1103.77	1166.26	1109.02	29.0556	27.9547	28.568	30.4996	32.032	30.1823	22	46330875	46357340	1438.5	TRMU	protein_coding	tRNA mitochondrial 2-thiouridylase	methylation; tRNA processing; tRNA wobble position uridine thiolation	transferase activity; methyltransferase activity; RNA binding; nucleotide binding; ATP binding; tRNA binding; sulfurtransferase activity; tRNA-5-taurinomethyluridine 2-sulfurtransferase	mitochondrion	3.82928e-05	0.1189	0.0346004	1
ENSG00000170801	2122	1969	1666	1542	1706	1532	1572.11	1629.59	1671.93	1725.39	1846.51	1689.04	689.221	714.418	732.982	756.42	809.517	740.481	19.0137	19.5233	20.2258	20.9017	22.2339	20.1524	4	8269754	8307098	2281	HTRA3	protein_coding	HtrA serine peptidase 3	proteolysis; negative regulation of transforming growth factor beta receptor signaling pathway; negative regulation of BMP signaling pathway	protein binding; serine-type endopeptidase activity; peptidase activity; hydrolase activity; serine-type peptidase activity; identical protein binding; endopeptidase activity	extracellular region	3.92494e-05	0.111687	0.0347532	1
ENSG00000127507	1875	1570	1368	1341	1399	1256	1389.12	1299.37	1372.87	1500.49	1514.22	1384.75	633.433	592.506	626.024	684.218	690.48	631.439	17.4747	16.1918	17.2744	18.9065	18.9645	17.1848	19	14732392	14778560	2193	ADGRE2	protein_coding	adhesion G protein-coupled receptor E2	G protein-coupled receptor signaling pathway; cell surface receptor signaling pathway; signal transduction; cell adhesion; inflammatory response; cell migration; adenylate cyclase-activating G protein-coupled receptor signaling pathway; granulocyte chemotaxis; regulation of mast cell degranulation	G protein-coupled receptor activity; calcium ion binding; transmembrane signaling receptor activity; protein binding; chondroitin sulfate binding	membrane; cell projection; plasma membrane; ruffle membrane; leading edge membrane	3.782e-05	0.115406	0.0350266	1
ENSG00000173588	634	572	452	382	343	373	469.707	473.4	453.61	427.432	371.25	411.234	729.359	735.093	704.363	663.715	576.475	638.563	20.121	20.0883	19.4361	18.34	15.8333	17.3787	12	94306449	94459988	644	CEP83	protein_coding	centrosomal protein 83	cell projection organization; cilium assembly; protein localization to centrosome; establishment of centrosome localization; vesicle docking	protein binding	cytoplasm; centriole; cytoskeleton; cytosol; centrosome; Golgi apparatus; ciliary transition fiber	-2.26905e-05	-0.208349	0.0351494	1
ENSG00000160226	436	398	323	355	313	362	323.016	329.393	324.15	397.221	338.779	399.107	251.767	256.737	252.65	309.603	264.052	311.073	6.94556	7.01601	6.97159	8.55507	7.25238	8.46594	21	44328944	44339402	1283	CFAP410	protein_coding	cilia and flagella associated protein 410	cellular response to DNA damage stimulus; cell projection organization; cytoskeleton organization; regulation of cell shape; smoothened signaling pathway; cilium assembly	protein binding	cytoplasm; cell projection; intracellular membrane-bounded organelle; cytosol; plasma membrane; mitochondrion; cytoskeleton; ciliary basal body; photoreceptor outer segment; photoreceptor connecting cilium; photoreceptor cell cilium	2.13101e-05	0.216568	0.0351496	1
ENSG00000145012	7082	6258	5332	4299	4781	4430	5246.8	5179.26	5350.99	4810.29	5174.77	4884.1	9015.11	8899.07	9194.14	8265.11	8891.36	8391.92	248.702	243.19	253.701	228.384	244.207	228.388	3	188153284	188890671	582	LPP	protein_coding	LIM domain containing preferred translocation partner in lipoma	cell adhesion; cell-cell adhesion	metal ion binding; protein binding	cytosol; focal adhesion; nucleus; cytoplasm; membrane; plasma membrane; anchoring junction; stress fiber	-5.54273e-05	-0.0851365	0.0352588	1
ENSG00000164953	626	540	456	381	362	345	463.781	446.916	457.624	426.313	391.815	380.364	143.942	138.708	142.031	132.313	121.606	118.052	3.97096	3.79055	3.91918	3.65613	3.33999	3.21282	8	93754844	93819234	3222	TMEM67	protein_coding	transmembrane protein 67	cilium assembly; cell projection organization; ubiquitin-dependent ERAD pathway; negative regulation of centrosome duplication; non-canonical Wnt signaling pathway	protein binding; unfolded protein binding; filamin binding	MKS complex; membrane; cytoplasm; cell projection; cytoplasmic vesicle membrane; endoplasmic reticulum; endoplasmic reticulum membrane; plasma membrane; cilium; cytoskeleton; centrosome; ciliary membrane; ciliary transition zone	-2.2407e-05	-0.191651	0.0353041	1
ENSG00000138623	1938	1525	1385	1268	1421	1365	1435.79	1262.12	1389.93	1418.81	1538.04	1504.92	593.303	521.538	574.352	586.284	635.552	621.867	16.3676	14.2524	15.8486	16.2004	17.4559	16.9243	15	74409289	74433958	2420	SEMA7A	protein_coding	semaphorin 7A (John Milton Hagen blood group)	cell differentiation; nervous system development; inflammatory response; integrin-mediated signaling pathway; positive regulation of axon extension; positive regulation of ERK1 and ERK2 cascade; immune response; regulation of inflammatory response; neural crest cell migration; axon guidance; positive regulation of cell migration; negative regulation of axon extension involved in axon guidance; ne…	protein binding; semaphorin receptor binding; integrin binding; chemorepellent activity	membrane; plasma membrane; side of membrane; external side of plasma membrane; collagen-containing extracellular matrix	3.86906e-05	0.126246	0.0353702	1
ENSG00000163527	10521	9252	7746	7251	7379	7390	7794.62	7657.16	7773.58	8113.38	7986.74	8147.51	7257.56	7129.57	7237.97	7554.36	7436.45	7586.14	200.217	194.834	199.723	208.745	204.247	206.459	3	31532638	31637616	1074	STT3B	protein_coding	STT3 oligosaccharyltransferase complex catalytic subunit B	protein glycosylation; response to unfolded protein; ubiquitin-dependent ERAD pathway; glycoprotein catabolic process; post-translational protein modification; protein N-linked glycosylation; protein N-linked glycosylation via asparagine; co-translational protein modification	oligosaccharyl transferase activity; metal ion binding; transferase activity; glycosyltransferase activity; protein binding; dolichyl-diphosphooligosaccharide-protein glycotransferase activity	membrane; endoplasmic reticulum; endoplasmic reticulum membrane; oligosaccharyltransferase complex; protein-containing complex; oligosaccharyltransferase I complex	0.000133529	0.0621246	0.0354923	1
ENSG00000103326	2735	2404	2037	1939	2015	1927	2026.26	1989.6	2044.25	2169.61	2180.96	2124.53	1671.83	1641.59	1686.68	1790.11	1799.47	1752.91	46.1213	44.8606	46.5419	49.4649	49.4237	47.7059	16	527712	554636	1212	CAPN15	protein_coding	calpain 15	proteolysis	calcium-dependent cysteine-type endopeptidase activity; metal ion binding; peptidase activity; cysteine-type peptidase activity; hydrolase activity; protein binding	cytoplasm	4.37225e-05	0.0958595	0.035532	1
ENSG00000100036	941	680	542	584	653	611	697.153	562.783	543.93	653.457	706.782	673.63	335.008	270.439	261.379	314.011	339.636	323.705	9.24197	7.39044	7.21245	8.67686	9.32833	8.80973	22	30635781	30669016	2081	SLC35E4	protein_coding	solute carrier family 35 member E4	transmembrane transport	protein binding; antiporter activity	membrane; Golgi apparatus	1.14177e-05	0.167937	0.0355561	1
ENSG00000010244	8961	7961	6691	5612	5767	5898	6638.88	6588.7	6714.83	6279.45	6241.98	6502.57	6781.28	6730.03	6858.86	6414.15	6375.87	6642.06	187.077	183.916	189.262	177.238	175.118	180.765	17	32350132	32381885	979	ZNF207	protein_coding	zinc finger protein 207	cell division; cell cycle; chromosome segregation; protein stabilization; microtubule bundle formation; mitotic spindle assembly checkpoint signaling; mitotic spindle assembly; attachment of spindle microtubules to kinetochore; mitotic sister chromatid segregation; microtubule polymerization; regulation of chromosome segregation	RNA binding; metal ion binding; DNA binding; microtubule binding; protein binding; heparin binding	nucleus; cytoplasm; nucleoplasm; nucleolus; cytoskeleton; chromosome; microtubule; chromosome, centromeric region; kinetochore; spindle; spindle matrix	-0.000176858	-0.0678498	0.0357887	1
ENSG00000079432	5955	5393	4540	4439	4282	4209	4411.84	4463.36	4556.17	4966.94	4634.67	4640.44	1302	1317.21	1344.6	1465.82	1367.76	1369.47	35.9188	35.9962	37.1026	40.5042	37.5666	37.2705	19	42268537	42295797	3388.5	CIC	protein_coding	capicua transcriptional repressor	negative regulation of transcription by RNA polymerase II; transcription by RNA polymerase II; brain development; learning; memory; social behavior; negative regulation of DNA-templated transcription; lung alveolus development; regulation of transcription by RNA polymerase II	DNA binding; chromatin binding; protein binding; DNA-binding transcription factor activity, RNA polymerase II-specific; RNA polymerase II transcription regulatory region sequence-specific DNA binding	nucleus; protein-containing complex; intracellular membrane-bounded organelle; nucleoplasm; chromatin	6.0408e-05	0.0848489	0.0358195	1
ENSG00000189043	8332	8031	5878	5259	5227	5502	6172.87	6646.63	5898.93	5884.47	5657.5	6065.98	11559.7	12446.9	11046.7	11019.6	10594.6	11359.5	318.9	340.143	304.82	304.498	290.987	309.152	7	10931943	10940153	534	NDUFA4	protein_coding	NDUFA4 mitochondrial complex associated	mitochondrial electron transport, NADH to ubiquinone; mitochondrial electron transport, cytochrome c to oxygen; cellular respiration; positive regulation of cytochrome-c oxidase activity	protein binding; NADH dehydrogenase (ubiquinone) activity; protein-containing complex binding	membrane; mitochondrion; mitochondrial inner membrane; respirasome; mitochondrial respiratory chain complex IV; mitochondrial respiratory chain complex I; mitochondrial membrane	-5.73884e-05	-0.0887985	0.0359871	1
ENSG00000188859	28	19	19	11	7	6	20.7442	15.7248	19.0677	12.3083	7.57653	6.61503	9.01921	6.83687	8.29029	5.35142	3.29414	2.8761	0.248815	0.186835	0.228761	0.147872	0.0904759	0.0782739	1	166057426	166167001	2300	FAM78B	protein_coding	family with sequence similarity 78 member B				-4.35651e-06	-1.07072	0.0361421	1
ENSG00000167380	1919	1726	1465	1229	1187	1197	1421.72	1428.48	1470.22	1375.17	1284.76	1319.7	2307.98	2318.95	2386.72	2232.42	2085.65	2142.37	63.671	63.3715	65.8586	61.6869	57.2839	58.3051	19	44165073	44178381	616	ZNF226	protein_coding	zinc finger protein 226	regulation of DNA-templated transcription; positive regulation of transcription by RNA polymerase II; regulation of transcription by RNA polymerase II	metal ion binding; DNA binding; RNA polymerase II cis-regulatory region sequence-specific DNA binding; DNA-binding transcription activator activity, RNA polymerase II-specific	nucleus	-4.05973e-05	-0.117996	0.0361603	1
ENSG00000145780	1932	1685	1330	1172	1146	1170	1431.35	1394.54	1334.74	1311.39	1240.39	1289.93	251.246	244.785	234.288	230.189	217.726	226.423	6.93119	6.6894	6.46489	6.36068	5.98	6.16216	5	115520908	115544775	5697	FEM1C	protein_coding	fem-1 homolog C	protein ubiquitination; proteasome-mediated ubiquitin-dependent protein catabolic process; ubiquitin-dependent protein catabolic process; ubiquitin-dependent protein catabolic process via the C-end degron rule pathway	protein binding; ubiquitin ligase-substrate adaptor activity	nucleoplasm; cytosol; ubiquitin ligase complex; Cul2-RING ubiquitin ligase complex	-4.50703e-05	-0.116732	0.0363	1
ENSG00000132382	2494	2140	1694	1704	1827	1665	1847.71	1771.11	1700.03	1906.66	1977.47	1835.67	1881.58	1803.57	1731.19	1941.61	2013.72	1869.32	51.9077	49.2874	47.7703	53.6513	55.3082	50.874	17	4538897	4555386	982	MYBBP1A	protein_coding	MYB binding protein 1a	regulation of DNA-templated transcription; rhythmic process; circadian regulation of gene expression; ribosome biogenesis; negative regulation of DNA-templated transcription; chromatin remodeling; positive regulation of histone acetylation; positive regulation of transcription by RNA polymerase I; positive regulation of transcription by RNA polymerase II; positive regulation of transcription by R…	DNA binding; transcription factor binding; RNA binding; transcription corepressor activity; sequence-specific DNA binding; E-box binding	nucleolus; nucleus; cytoplasm; membrane; intracellular membrane-bounded organelle; nucleoplasm; B-WICH complex; NLS-dependent protein nuclear import complex	0.000116079	0.103243	0.0363453	1
ENSG00000247627	2507	2201	2030	1514	1675	1605	1857.34	1821.6	2037.23	1694.06	1812.96	1769.52	1348.83	1322.87	1479.47	1230.26	1316.6	1285.05	37.2107	36.1509	40.8242	33.9949	36.1613	34.9731	5	134926660	134928036	1377	MTND4P12	processed_pseudogene	MT-ND4 pseudogene 12				-4.01239e-05	-0.113555	0.0363841	1
ENSG00000164715	1673	1589	1324	1189	1303	1331	1239.46	1315.09	1328.71	1330.41	1410.32	1467.43	260.556	276.454	279.318	279.674	296.472	308.479	7.18803	7.55482	7.70745	7.72806	8.1428	8.39534	7	98106862	98209638	4757	LMTK2	protein_coding	lemur tyrosine kinase 2	protein phosphorylation; phosphorylation; early endosome to late endosome transport; receptor recycling; transferrin transport; endocytic recycling; protein autophosphorylation; peptidyl-threonine phosphorylation; peptidyl-serine phosphorylation	ATP binding; protein kinase activity; nucleotide binding; protein serine/threonine kinase activity; kinase activity; transferase activity; protein binding; protein serine kinase activity; protein phosphatase inhibitor activity; myosin VI binding	membrane; Golgi apparatus; perinuclear region of cytoplasm; recycling endosome; cytosol; early endosome; growth cone; neuronal cell body	3.87854e-05	0.117463	0.0363928	1
ENSG00000007384	4080	3589	3003	2849	3138	2735	3022.72	2970.33	3013.69	3187.84	3396.45	3015.35	3354.85	3296.71	3344.83	3538.11	3769.64	3346.67	92.5513	90.0912	92.2967	97.7664	103.536	91.0806	16	58059	76355	901	RHBDF1	protein_coding	rhomboid 5 homolog 1	protein transport; regulation of epidermal growth factor receptor signaling pathway; negative regulation of protein secretion; cell migration; regulation of proteasomal protein catabolic process; cell population proliferation; regulation of protein secretion	serine-type endopeptidase activity; protein binding; growth factor binding	membrane; Golgi apparatus; endoplasmic reticulum; endoplasmic reticulum membrane; Golgi membrane	-9.45088e-06	0.0921154	0.0365179	1
ENSG00000251273	1	1	0	5	5	2	0.740863	0.827622	0	5.59467	5.41181	2.20501	0.682195	0.762083	0	5.15163	4.98325	2.0304	0.0188199	0.0208259	0	0.142352	0.136868	0.0552578	5	25087450	25190956	1086	LINC02228	lncRNA	long intergenic non-protein coding RNA 2228				1.76868e-06	2.99514	0.0365612	1
ENSG00000170899	1312	1113	939	782	786	776	972.013	921.143	942.344	875.006	850.736	855.544	978.865	927.636	948.987	881.174	856.733	861.575	27.0042	25.3501	26.1862	24.3489	23.5308	23.448	6	52977948	52995304	993	GSTA4	protein_coding	glutathione S-transferase alpha 4	glutathione metabolic process; xenobiotic metabolic process	glutathione transferase activity; transferase activity; protein homodimerization activity; protein binding; identical protein binding	cytoplasm; cytosol	-3.59949e-05	-0.136149	0.0365642	1
ENSG00000124151	3843	3599	3029	2719	2796	3134	2847.14	2978.61	3039.79	3042.38	3026.28	3455.25	421.798	441.276	450.339	450.723	448.338	511.889	11.6363	12.059	12.4266	12.4545	12.3139	13.9312	20	47501887	47656877	6750	NCOA3	protein_coding	nuclear receptor coactivator 3	regulation of DNA-templated transcription; chromatin remodeling; positive regulation of transcription by RNA polymerase II; cellular response to hormone stimulus; positive regulation of keratinocyte differentiation; regulation of stem cell division; cell dedifferentiation; positive regulation of stem cell population maintenance; cellular response to estradiol stimulus; receptor transactivation	protein dimerization activity; transcription coactivator activity; nuclear receptor binding; nuclear receptor coactivator activity; transferase activity; acyltransferase activity; protein binding; histone acetyltransferase activity; peptide-lysine-N-acetyltransferase activity; RNA polymerase II complex binding; RNA polymerase II-specific DNA-binding transcription factor binding; molecular adaptor…	nucleus; cytoplasm; protein-containing complex; nucleoplasm; cytosol; chromatin; extracellular exosome	4.83677e-05	0.104083	0.0366052	1
ENSG00000052749	1531	1214	1010	1029	1148	975	1134.26	1004.73	1013.6	1151.38	1242.55	1074.94	1361.66	1206.16	1216.8	1382.21	1491.66	1290.45	37.5645	32.9615	33.5762	38.1938	40.9694	35.1199	10	97356358	97426076	833	RRP12	protein_coding	ribosomal RNA processing 12 homolog	rRNA processing	RNA binding	nucleus; membrane; intracellular membrane-bounded organelle; nucleolus; cytosol; plasma membrane; nuclear membrane	0.000199954	0.13612	0.0366183	1
ENSG00000243715	0	0	0	1	4	2	0	0	0	1.11893	4.32945	2.20501	0	0	0	0.538466	2.08347	1.06112	0	0	0	0.0148791	0.0572238	0.0288787	3	54874605	54901255	2078	CACNA2D3-AS1	lncRNA	CACNA2D3 antisense RNA 1				1.00234e-06	4.02963	0.0366696	1
ENSG00000204227	2184	2027	1553	1590	1605	1577	1618.05	1677.59	1558.53	1779.1	1737.19	1738.65	988.723	1025.11	952.356	1087.14	1061.53	1062.42	27.2762	28.0138	26.2791	30.0402	29.1556	28.9141	6	33208500	33212722	1636.5	RING1	protein_coding	ring finger protein 1	histone H2A monoubiquitination; protein ubiquitination; chromatin organization; chromatin remodeling; anterior/posterior pattern specification; negative regulation of DNA-templated transcription; camera-type eye morphogenesis	metal ion binding; transferase activity; protein binding; chromatin binding; ubiquitin-protein transferase activator activity; ubiquitin protein ligase activity	ubiquitin ligase complex; nucleus; nuclear speck; nucleoplasm; cytosol; PcG protein complex; nuclear body; sex chromatin; PRC1 complex	4.02126e-05	0.113507	0.0368316	1
ENSG00000186185	1916	1777	1430	1418	1580	1302	1419.49	1470.68	1435.09	1586.65	1710.13	1435.46	426.467	441.846	431.153	476.685	513.784	431.264	11.7651	12.0746	11.8972	13.1719	14.1114	11.737	17	44924709	44947773	3328.5	KIF18B	protein_coding	kinesin family member 18B	microtubule-based movement; cell division; cell cycle; regulation of cell division; microtubule depolymerization; mitotic cell cycle; mitotic sister chromatid segregation	ATP binding; microtubule binding; microtubule motor activity; nucleotide binding; cytoskeletal motor activity; protein binding; ATP hydrolysis activity; kinesin binding; plus-end-directed microtubule motor activity	nucleus; cytoplasm; nucleoplasm; cytosol; cytoskeleton; nuclear body; microtubule; microtubule end; kinesin complex; mitotic spindle midzone; microtubule plus-end; astral microtubule; mitotic spindle astral microtubule	3.64992e-05	0.129978	0.0368569	1
ENSG00000136378	6698	6358	5551	5125	5062	5024	4962.3	5262.02	5570.77	5734.53	5478.91	5538.98	1561.45	1655.76	1752.92	1804.45	1724.01	1742.91	43.0763	45.2481	48.3697	49.8611	47.3512	47.4339	15	78759206	78811464	3178	ADAMTS7	protein_coding	ADAM metallopeptidase with thrombospondin type 1 motif 7	proteolysis; extracellular matrix organization; cellular response to BMP stimulus; negative regulation of chondrocyte differentiation; cellular response to tumor necrosis factor; proteolysis involved in protein catabolic process; cellular response to interleukin-1; ossification; chondrocyte differentiation; proteoglycan metabolic process; collagen fibril organization; ossification involved in bon…	metallopeptidase activity; metalloendopeptidase activity; protein binding; metal ion binding; peptidase activity; hydrolase activity	extracellular region; extracellular matrix; endoplasmic reticulum lumen; cell surface	6.9058e-05	0.0859841	0.0369192	1
ENSG00000284194	715	687	496	540	526	564	529.717	568.576	497.766	604.224	569.322	621.813	533.989	573.161	501.78	609.097	573.913	626.827	14.7313	15.6631	13.846	16.8308	15.7629	17.0593	22	50523568	50526461	992	SCO2	protein_coding	synthesis of cytochrome C oxidase 2	cellular copper ion homeostasis; respiratory chain complex IV assembly; mitochondrial cytochrome c oxidase assembly; eye development; in utero embryonic development; muscle system process; response to activity; respiratory electron transport chain; copper ion homeostasis	copper ion binding; copper chaperone activity; metal ion binding; protein binding; protein-disulfide reductase activity	mitochondrial inner membrane; membrane; mitochondrion; mitochondrial matrix; myofibril	2.24979e-05	0.167499	0.037061	1
ENSG00000072786	1739	1473	1250	1146	1298	1252	1288.36	1219.09	1254.45	1282.3	1404.9	1380.34	2353.17	2226.64	2291.23	2342.1	2566.04	2521.16	64.9176	60.8488	63.224	64.7176	70.4779	68.6141	5	172042079	172188224	547.5	STK10	protein_coding	serine/threonine kinase 10	protein phosphorylation; phosphorylation; cell cycle; protein autophosphorylation; lymphocyte aggregation; regulation of lymphocyte migration	ATP binding; protein serine/threonine kinase activity; protein kinase activity; nucleotide binding; kinase activity; transferase activity; protein homodimerization activity; protein serine kinase activity; protein binding; identical protein binding	membrane; plasma membrane; cytoplasm; cytosol; extracellular exosome; specific granule membrane	4.34637e-05	0.112498	0.037085	1
ENSG00000264187	1	0	1	2	7	3	0.740863	0	1.00356	2.23787	7.57653	3.30751	0.437604	0	0.592771	1.32183	4.47521	1.95364	0.0120723	0	0.0163568	0.0365254	0.122915	0.0531689	17	17202649	17237185	1693		protein_coding	novel protein				1.7706e-06	2.95078	0.0371538	1
ENSG00000160957	2143	1896	1473	1424	1546	1580	1587.67	1569.17	1478.25	1593.36	1673.33	1741.96	2032.87	2009.18	1892.76	2040.15	2142.55	2230.42	56.0813	54.9061	52.2285	56.3743	58.8466	60.7015	8	144511288	144517845	781	RECQL4	protein_coding	RecQ like helicase 4	DNA replication; DNA recombination; cellular response to DNA damage stimulus; DNA repair; double-strand break repair via homologous recombination; telomere maintenance; DNA duplex unwinding; DNA unwinding involved in DNA replication; telomeric D-loop disassembly	ATP binding; nucleic acid binding; helicase activity; protein binding; nucleotide binding; hydrolase activity; ATP hydrolysis activity; bubble DNA binding; four-way junction helicase activity; oxidized purine DNA binding; telomeric D-loop binding; DNA/DNA annealing activity	chromosome, telomeric region; nucleus; cytoplasm; membrane; nucleoplasm; chromosome	8.26462e-05	0.110386	0.0372003	1
ENSG00000159842	7222	6419	5496	5018	5412	5075	5350.52	5312.5	5515.57	5614.81	5857.74	5595.21	9099.52	9034.87	9380.22	9548.99	9962.14	9515.67	251.031	246.901	258.836	263.861	273.617	258.972	17	1003519	1229738	588	ABR	protein_coding	ABR activator of RhoGEF and GTPase	signal transduction; intracellular signal transduction; positive regulation of GTPase activity; regulation of small GTPase mediated signal transduction; activation of GTPase activity; small GTPase mediated signal transduction; modulation of chemical synaptic transmission; protein phosphorylation	guanyl-nucleotide exchange factor activity; GTPase activator activity; protein binding; protein serine/threonine kinase activity	membrane; cell projection; synapse; axon; dendritic spine; cytosol; Schaffer collateral - CA1 synapse; glutamatergic synapse	6.56712e-05	0.0776732	0.0372194	1
ENSG00000196839	486	434	321	266	296	251	360.06	359.188	322.143	297.636	320.379	276.729	234.261	233.694	209.592	193.647	208.444	180.045	6.46263	6.3863	5.78345	5.35094	5.72507	4.89997	20	44584896	44652252	1537	ADA	protein_coding	adenosine deaminase	purine ribonucleoside monophosphate biosynthetic process; nucleotide metabolic process; cell adhesion; allantoin metabolic process; in utero embryonic development; trophectodermal cell differentiation; liver development; placenta development; germinal center B cell differentiation; germinal center formation; positive regulation of germinal center formation; negative regulation of leukocyte migrat…	deaminase activity; adenosine deaminase activity; 2'-deoxyadenosine deaminase activity; hydrolase activity, acting on carbon-nitrogen (but not peptide) bonds, in cyclic amidines; metal ion binding; hydrolase activity; zinc ion binding; protein binding	cytosol; plasma membrane; anchoring junction; cytoplasmic vesicle lumen; membrane; cytoplasm; cytoplasmic vesicle; lysosome; cell surface; external side of plasma membrane	2.66437e-06	-0.221525	0.0372303	1
ENSG00000230487	829	617	517	561	559	584	614.176	510.643	518.841	627.721	605.04	643.863	679.398	564.87	573.939	694.382	669.292	712.238	18.7427	15.4366	15.8372	19.1874	18.3826	19.3837	7	1570073	1589626	904	PSMG3-AS1	lncRNA	PSMG3 antisense RNA 1 (head to head)				2.18678e-05	0.18812	0.0374775	1
ENSG00000244405	3893	3346	2728	2724	2861	2546	2884.18	2769.22	2737.71	3047.97	3096.64	2806.98	5029.09	4828.63	4773.7	5314.69	5399.54	4894.47	138.739	131.955	131.725	146.857	148.302	133.204	3	186046314	186110318	573.5	ETV5	protein_coding	ETS variant transcription factor 5	regulation of DNA-templated transcription; regulation of transcription by RNA polymerase II; negative regulation of transcription by RNA polymerase II; positive regulation of transcription by RNA polymerase II; cellular response to oxidative stress; positive regulation of neuron differentiation; male germ-line stem cell asymmetric division; positive regulation of glial cell proliferation	DNA-binding transcription factor activity; sequence-specific DNA binding; DNA binding; protein binding; DNA-binding transcription factor activity, RNA polymerase II-specific; transcription cis-regulatory region binding; sequence-specific double-stranded DNA binding; DNA-binding transcription activator activity, RNA polymerase II-specific; RNA polymerase II transcription regulatory region sequence…	nucleus; nucleoplasm; chromatin	8.75015e-05	0.0925359	0.0376534	1
ENSG00000258365	4	0	0	4	3	9	2.96345	0	0	4.47573	3.24708	9.92254	4.95147	0	0	7.47825	5.42537	16.579	0.136598	0	0	0.206642	0.149011	0.451203	12	94277758	94282844	598.5		lncRNA	novel transcript, antisense to PLXNC1				1.95973e-06	2.45748	0.0376895	1
ENSG00000143147	1684	1678	1317	1272	1283	1366	1247.61	1388.75	1321.69	1423.28	1388.67	1506.02	466.224	518.965	493.905	531.87	518.935	562.788	12.8618	14.1821	13.6287	14.6968	14.2529	15.3164	1	168079542	168137667	2676	GPR161	protein_coding	G protein-coupled receptor 161	G protein-coupled receptor signaling pathway; signal transduction; adenylate cyclase-activating G protein-coupled receptor signaling pathway; negative regulation of smoothened signaling pathway involved in dorsal/ventral neural tube patterning	G protein-coupled receptor activity; protein binding	membrane; cell projection; plasma membrane; cilium; recycling endosome; ciliary membrane; endocytic vesicle membrane; neuron projection; glial cell projection	3.70039e-05	0.126229	0.0378209	1
ENSG00000159263	586	569	471	488	498	429	434.146	470.917	472.677	546.039	539.016	472.975	194.249	210.701	211.489	244.313	241.17	211.622	5.3588	5.75796	5.83578	6.75094	6.62391	5.75935	21	36699115	36749917	2235	SIM2	protein_coding	SIM bHLH transcription factor 2	regulation of DNA-templated transcription; cell differentiation; nervous system development; regulation of transcription by RNA polymerase II; system development; negative regulation of transcription by RNA polymerase II; embryonic pattern specification; lung development; negative regulation of DNA-templated transcription	DNA binding; protein binding; DNA-binding transcription factor activity; protein dimerization activity; DNA-binding transcription factor activity, RNA polymerase II-specific; RNA polymerase II transcription regulatory region sequence-specific DNA binding; protein heterodimerization activity	nucleus; nucleoplasm; nuclear body; chromatin	2.04718e-05	0.17939	0.0378328	1
ENSG00000198720	719	649	584	544	561	578	532.681	537.126	586.08	608.7	607.205	637.248	216.098	217.901	237.76	246.937	246.331	258.518	5.96155	5.95472	6.56072	6.82345	6.76563	7.03565	17	29589769	29614761	2465	ANKRD13B	protein_coding	ankyrin repeat domain 13B	negative regulation of receptor internalization	protein binding; ubiquitin-dependent protein binding	cytoplasm; membrane; intracellular membrane-bounded organelle; plasma membrane; endosome; late endosome; perinuclear region of cytoplasm; early endosome	2.71623e-05	0.16503	0.037856	1
ENSG00000165689	2295	2065	1635	1623	1622	1675	1700.28	1709.04	1640.82	1816.03	1755.59	1846.7	2478.54	2491.31	2391.87	2647.27	2559.17	2691.98	68.3763	68.0816	66.0008	73.1504	70.2893	73.2629	9	136401922	136410614	686	ENTR1	protein_coding	endosome associated trafficking regulator 1	protein transport; cell division; cell cycle; cell projection organization; endocytic recycling; regulation of cytokinesis; positive regulation of cilium assembly; positive regulation of protein localization to cilium	protein binding	cytoplasm; cell projection; endosome; cytoskeleton; recycling endosome; early endosome; midbody; centrosome; ciliary basal body; retromer complex	4.59739e-05	0.100518	0.0378883	1
ENSG00000023902	3722	3623	2720	2627	2776	2873	2757.49	2998.47	2729.69	2939.44	3004.63	3167.5	3894.77	4235.13	3855.49	4151.75	4243.83	4473.86	107.446	115.736	106.388	114.723	116.56	121.758	1	150149183	150164720	708	PLEKHO1	protein_coding	pleckstrin homology domain containing O1	myoblast fusion; regulation of cell shape; myoblast migration; lamellipodium morphogenesis; regulation of myoblast fusion	protein binding	nucleus; cytoplasm; membrane; plasma membrane; ruffle membrane; muscle cell projection membrane	3.22151e-05	0.10233	0.0379175	1
ENSG00000105281	5441	5028	3831	3840	3978	3766	4031.04	4161.28	3844.64	4296.7	4305.63	4152.03	2225.86	2297.78	2122.94	2372.56	2377.49	2292.67	61.4055	62.7929	58.58	65.5594	65.2994	62.3958	19	46774883	46788594	1811	SLC1A5	protein_coding	solute carrier family 1 member 5	viral entry into host cell; amino acid transport; erythrocyte differentiation; transport across blood-brain barrier; neutral amino acid transport; protein homotrimerization; L-aspartate import across plasma membrane; glutamine transport; glutamine secretion; L-serine transport; L-glutamine import across plasma membrane; transmembrane transport; L-alpha-amino acid transmembrane transport	symporter activity; metal ion binding; L-amino acid transmembrane transporter activity; protein binding; antiporter activity; signaling receptor activity; neutral L-amino acid transmembrane transporter activity; virus receptor activity; amino acid transmembrane transporter activity; L-aspartate transmembrane transporter activity; L-glutamine transmembrane transporter activity; L-serine transmembr…	membrane; plasma membrane; melanosome; extracellular exosome; basal plasma membrane	4.41729e-05	0.0827192	0.0379338	1
ENSG00000152926	1315	1127	938	730	824	802	974.235	932.73	941.34	816.821	891.866	884.209	183.23	175.424	177.043	153.624	167.739	166.298	5.05483	4.79392	4.88531	4.24501	4.60705	4.52586	7	64971772	65006684	5317	ZNF117	protein_coding	zinc finger protein 117	regulation of transcription by RNA polymerase II; regulation of DNA-templated transcription	metal ion binding; zinc ion binding; DNA binding; DNA-binding transcription factor activity; RNA polymerase II cis-regulatory region sequence-specific DNA binding; DNA-binding transcription factor activity, RNA polymerase II-specific	nucleus	-3.11841e-05	-0.135943	0.0381479	1
ENSG00000205133	1717	1559	1247	1016	1060	1113	1272.06	1290.26	1251.44	1136.84	1147.3	1227.09	1580.2	1602.81	1554.58	1412.22	1425.22	1524.33	43.5935	43.801	42.8969	39.0229	39.1447	41.4851	8	92883532	93017673	805	TRIQK	protein_coding	triple QxxK/R motif containing			endoplasmic reticulum membrane; membrane; endoplasmic reticulum	9.99172e-06	-0.119678	0.0382026	1
ENSG00000236810	125	82	75	51	47	57	92.6079	67.865	75.2671	57.0656	50.871	62.8428	103.473	75.8268	84.0973	63.7604	56.8391	70.2154	2.85453	2.07217	2.32057	1.76185	1.56112	1.91093	1	23706901	23778325	895	ELOA-AS1	lncRNA	ELOA antisense RNA 1				-9.60597e-06	-0.469857	0.0383926	1
ENSG00000162769	788	618	527	394	465	450	583.8	511.47	528.877	440.86	503.298	496.127	974.625	853.873	882.933	735.993	840.23	828.259	26.8873	23.3343	24.3635	20.3372	23.0775	22.5413	1	212858275	212899363	599	FLVCR1	protein_coding	FLVCR heme transporter 1	transmembrane transport; erythrocyte maturation; erythrocyte differentiation; mitochondrial transport; cellular iron ion homeostasis; heme biosynthetic process; heme transport; heme export; blood vessel development; in utero embryonic development; limb morphogenesis; multicellular organism growth; embryonic digit morphogenesis; regulation of organ growth; spleen development; embryonic skeletal sy…	transmembrane transporter activity; protein binding; heme binding; heme transmembrane transporter activity	membrane; plasma membrane; mitochondrion; mitochondrial membrane; mitochondrial inner membrane	-2.54461e-05	-0.174948	0.0387733	1
ENSG00000086065	4742	4231	3371	2813	3053	2991	3513.17	3501.67	3383	3147.56	3304.45	3297.59	1848.07	1842.01	1779.59	1655.74	1738.27	1734.66	50.9831	50.3378	49.1058	45.752	47.7427	47.2093	9	33264879	33282070	1901	CHMP5	protein_coding	charged multivesicular body protein 5	vacuolar transport; protein transport; plasma membrane repair; mitotic metaphase plate congression; nuclear membrane reassembly; viral budding via host ESCRT complex; ubiquitin-dependent protein catabolic process via the multivesicular body sorting pathway; viral budding from plasma membrane; midbody abscission; multivesicular body sorting pathway; autophagosome maturation; regulation of mitotic …	protein binding; cadherin binding	cytoplasm; membrane; endosome; lysosomal membrane; cytosol; nuclear pore; endosome membrane; kinetochore; kinetochore microtubule; midbody; multivesicular body membrane; amphisome membrane; extracellular exosome; plasma membrane; multivesicular body; autophagosome membrane; nucleus	-4.22038e-05	-0.0933055	0.0387746	1
ENSG00000183423	4	6	2	0	1	0	2.96345	4.96573	2.00712	0	1.08236	0	0.796413	1.33451	0.539404	0	0.290879	0	0.0219709	0.0364691	0.0148842	0	0.00798919	0	4	109848107	109872315	3721	LRIT3	protein_coding	leucine rich repeat, Ig-like and transmembrane domains 3	response to stimulus; visual perception; regulation of fibroblast growth factor receptor signaling pathway	protein binding	membrane; cell projection; endoplasmic reticulum; endoplasmic reticulum membrane; dendrite; perikaryon	-1.69335e-06	-3.08065	0.0389232	1
ENSG00000222898	10	4	9	1	0	3	7.40863	3.31049	9.03205	1.11893	0	3.30751	22.2482	9.9414	27.1233	3.36016	0	9.93247	0.613766	0.271675	0.748435	0.0928491	0	0.270315	8	61631680	61632012	333	RN7SKP97	misc_RNA	RN7SK pseudogene 97				-2.26894e-06	-2.15468	0.0392271	1
ENSG00000268896	13	11	11	4	0	5	9.63123	9.10384	11.0392	4.47573	0	5.51252	21.4983	20.3211	24.641	9.99047	0	12.3047	0.593079	0.555326	0.67994	0.27606	0	0.334877	2	219547211	219547658	448		lncRNA	novel transcript, antisense to TMEM198				-2.93404e-06	-1.57916	0.0392325	1
ENSG00000114796	2089	2027	1783	1360	1299	1484	1547.66	1677.59	1789.35	1521.75	1405.99	1636.12	2636.57	2857.9	3048.29	2592.42	2395.21	2787.25	72.7357	78.0997	84.1141	71.6346	65.786	75.8559	3	183635610	183684519	587	KLHL24	protein_coding	kelch like family member 24	regulation of kainate selective glutamate receptor activity; protein ubiquitination; protein autoubiquitination; intermediate filament organization	protein binding	cytoplasm; cell projection; anchoring junction; adherens junction; perikaryon; axon; desmosome; Cul3-RING ubiquitin ligase complex	-2.99594e-05	-0.134208	0.0393503	1
ENSG00000108984	4194	3902	3590	2798	2709	2860	3107.18	3229.38	3602.78	3130.77	2932.12	3153.16	2034.83	2114.85	2359.39	2050.28	1920.18	2064.94	56.1354	57.7939	65.1045	56.654	52.7391	56.1979	17	69414697	69553865	1527	MAP2K6	protein_coding	mitogen-activated protein kinase kinase 6	protein phosphorylation; phosphorylation; apoptotic process; MAPK cascade; osteoblast differentiation; positive regulation of protein phosphorylation; response to ischemia; response to xenobiotic stimulus; ovulation cycle process; positive regulation of prostaglandin secretion; positive regulation of apoptotic process; positive regulation of MAPK cascade; positive regulation of nitric-oxide synth…	ATP binding; protein kinase activity; nucleotide binding; protein serine/threonine kinase activity; kinase activity; transferase activity; protein tyrosine kinase activity; protein binding; protein serine kinase activity; identical protein binding; protein kinase binding; MAP kinase kinase activity	nucleus; cytoplasm; nucleoplasm; cytosol; cytoskeleton	-4.59906e-05	-0.107531	0.0394026	1
ENSG00000103342	8056	6852	5678	5335	5804	5429	5968.4	5670.86	5698.22	5969.51	6282.03	5985.5	4988.21	4739.54	4762.41	4989.14	5250.33	5002.51	137.611	129.52	131.413	137.862	144.204	136.145	16	11868128	11916082	1196.5	GSPT1	protein_coding	G1 to S phase transition 1	nuclear-transcribed mRNA catabolic process, nonsense-mediated decay; translation; G1/S transition of mitotic cell cycle; protein methylation; translational termination; regulation of translational termination	GTPase activity; GTP binding; RNA binding; nucleotide binding; hydrolase activity; protein binding; translation release factor activity	cytosol; cytoplasm; cytosolic ribosome; translation release factor complex	-6.11778e-06	0.0725565	0.0395337	1
ENSG00000162298	2037	1957	1573	1546	1542	1509	1509.14	1619.66	1578.6	1729.87	1669	1663.68	1895.9	2034.74	1983.17	2173.2	2096.74	2090.05	52.3028	55.6047	54.7232	60.0508	57.5883	56.8813	11	65121780	65134532	796	SYVN1	protein_coding	synoviolin 1	protein ubiquitination; ubiquitin-dependent ERAD pathway; retrograde protein transport, ER to cytosol; protein stabilization; negative regulation of endoplasmic reticulum stress-induced intrinsic apoptotic signaling pathway; ubiquitin-dependent protein catabolic process; ERAD pathway; protein K48-linked ubiquitination; immature B cell differentiation	metal ion binding; transferase activity; protein binding; ubiquitin protein ligase activity; chaperone binding; ubiquitin-specific protease binding; unfolded protein binding; ATPase binding	membrane; endoplasmic reticulum; endoplasmic reticulum membrane; nucleoplasm; cytoplasm; endoplasmic reticulum quality control compartment; smooth endoplasmic reticulum; Derlin-1 retrotranslocation complex; Hrd1p ubiquitin ligase complex; Hrd1p ubiquitin ligase ERAD-L complex	3.80913e-05	0.105592	0.0396132	1
ENSG00000180881	571	492	454	316	335	360	423.033	407.19	455.617	353.583	362.591	396.902	349.903	336.799	376.854	292.459	299.91	328.289	9.65288	9.20391	10.3989	8.08133	8.23723	8.93449	12	75275979	75390928	1209	CAPS2	protein_coding	calcyphosine 2		calcium ion binding; metal ion binding		-2.13797e-05	-0.206139	0.0396384	1
ENSG00000100299	2227	2057	1690	1591	1750	1594	1649.9	1702.42	1696.02	1780.22	1894.13	1757.39	949.858	980.091	976.406	1024.88	1090.46	1011.74	26.204	26.7835	26.9428	28.3199	29.9503	27.5348	22	50622754	50628173	1737	ARSA	protein_coding	arylsulfatase A	autophagy; binding of sperm to zona pellucida; response to nutrient; response to pH; response to estrogen; response to ethanol; response to methylmercury; lipid metabolic process	sulfuric ester hydrolase activity; hydrolase activity; arylsulfatase activity; metal ion binding; calcium ion binding; protein binding; cerebroside-sulfatase activity	cellular anatomical entity; acrosomal vesicle; extracellular space; endosome; plasma membrane; membrane; extrinsic component of external side of plasma membrane; endoplasmic reticulum; lysosome; extracellular region; extracellular exosome; endoplasmic reticulum lumen; lysosomal lumen; azurophil granule lumen	4.46756e-05	0.106244	0.0397184	1
ENSG00000260328	0	0	0	2	1	2	0	0	0	2.23787	1.08236	2.20501	0	0	0	0.727288	0.351759	0.71661	0	0	0	0.0200967	0.00966129	0.0195028	17	17011914	17014990	3077		lncRNA	novel transcript				1.16365e-06	3.55512	0.0397581	1
ENSG00000153064	28	26	17	9	12	5	20.7442	21.5182	17.0605	10.0704	12.9883	5.51252	8.04194	8.34199	6.61389	3.90401	5.03521	2.13705	0.221855	0.227967	0.182503	0.107877	0.138296	0.0581605	4	101411286	102074812	2579.5	BANK1	protein_coding	B cell scaffold protein with ankyrin repeats 1	signal transduction; B cell activation; positive regulation of peptidyl-tyrosine phosphorylation; B cell receptor signaling pathway; negative regulation of protein kinase B signaling; negative regulation of B cell activation; MAPK cascade; response to bacterium; negative regulation of interleukin-6 production; positive regulation of MAPK cascade; protein kinase B signaling; negative regulation of…	protein binding; signaling receptor binding; protease binding; protein tyrosine kinase binding; phospholipase binding; signaling adaptor activity	perinuclear region of cytoplasm	-3.82015e-06	-1.05693	0.0399293	1
ENSG00000100401	6545	5669	4347	4432	4624	4343	4848.95	4691.79	4362.48	4959.11	5004.84	4788.18	2196.58	2125.38	1976.21	2246.48	2267.2	2169.05	60.5977	58.0817	54.5312	62.0756	62.2701	59.0313	22	41244779	41286187	2207.5	RANGAP1	protein_coding	Ran GTPase activating protein 1	signal transduction; response to axon injury; cellular response to peptide hormone stimulus; cellular response to vasopressin; activation of GTPase activity; nucleocytoplasmic transport; protein sumoylation; negative regulation of protein export from nucleus; nuclear export	protein binding; GTPase activator activity; small GTPase binding; ubiquitin protein ligase binding; cadherin binding; RNA binding	nucleus; cytoplasm; intracellular membrane-bounded organelle; nuclear membrane; cytosol; cytoskeleton; nuclear envelope; chromosome; nucleoplasm; aggresome; dendrite; perinuclear region of cytoplasm; mitotic spindle; axon cytoplasm; cytoplasmic periphery of the nuclear pore complex; nuclear pore; nuclear pore cytoplasmic filaments; chromosome, centromeric region; kinetochore; spindle; SUMO ligase…	5.21677e-05	0.0842863	0.0399402	1
ENSG00000186115	12	11	12	4	4	2	8.89036	9.10384	12.0427	4.47573	4.32945	2.20501	10.4716	10.723	14.1846	5.27177	5.09946	2.59718	0.288882	0.293034	0.391408	0.145671	0.14006	0.0706831	19	15878023	15898077	849	CYP4F2	protein_coding	cytochrome P450 family 4 subfamily F member 2	lipid metabolic process; fatty acid metabolic process; blood coagulation; regulation of blood pressure; arachidonic acid metabolic process; xenobiotic metabolic process; renal water homeostasis; omega-hydroxylase P450 pathway; fatty acid omega-oxidation; epoxygenase P450 pathway; vitamin E metabolic process; icosanoid metabolic process; leukotriene metabolic process; sodium ion homeostasis; very …	monooxygenase activity; heme binding; iron ion binding; oxidoreductase activity, acting on paired donors, with incorporation or reduction of molecular oxygen; metal ion binding; oxidoreductase activity; protein binding; aromatase activity; oxidoreductase activity, acting on paired donors, with incorporation or reduction of molecular oxygen, NAD(P)H as one donor, and incorporation of one atom of o…	cytoplasm; membrane; endoplasmic reticulum; endoplasmic reticulum membrane; intracellular membrane-bounded organelle; apical plasma membrane	-3.22618e-06	-1.43917	0.0399423	1
ENSG00000198886	350692	310264	269889	220829	242746	218892	259815	256781	270850	247093	262739	241329	188545	186343	196553	179313	190667	175130	5201.44	5092.32	5423.65	4954.83	5236.79	4766.22	MT	10760	12137	1378	MT-ND4	protein_coding	mitochondrially encoded NADH:ubiquinone oxidoreductase core subunit 4	ATP synthesis coupled electron transport; mitochondrial respiratory chain complex I assembly; response to hypoxia; in utero embryonic development; cerebellum development; response to nicotine; response to ethanol; mitochondrial electron transport, NADH to ubiquinone; aerobic respiration; proton motive force-driven mitochondrial ATP synthesis; electron transport coupled proton transport	NADH dehydrogenase (ubiquinone) activity; NADH dehydrogenase activity; ubiquinone binding	membrane; mitochondrion; mitochondrial inner membrane; mitochondrial membrane; respirasome; mitochondrial respiratory chain complex I	-6.45809e-05	-0.0680407	0.0399536	1
ENSG00000110200	1443	1288	1015	871	844	890	1069.07	1065.98	1018.61	974.591	913.513	981.229	1334.66	1330.81	1271.68	1216.72	1140.47	1225.01	36.8198	36.3678	35.0905	33.6208	31.3237	33.3389	11	72106378	72112780	801	ANAPC15	protein_coding	anaphase promoting complex subunit 15	regulation of mitotic cell cycle spindle assembly checkpoint; cell division; cell cycle; regulation of mitotic cell cycle; anaphase-promoting complex-dependent catabolic process; regulation of meiotic cell cycle	protein binding	anaphase-promoting complex; nucleoplasm; cytosol	-3.24469e-05	-0.137505	0.0400294	1
ENSG00000113578	163	121	93	66	74	76	120.761	100.142	93.3312	73.8496	80.0947	83.7904	123.857	102.71	95.7243	75.7432	82.1484	85.9388	3.41688	2.80682	2.6414	2.09296	2.25626	2.33885	5	142592178	142698070	975	FGF1	protein_coding	fibroblast growth factor 1	signal transduction; cell differentiation; positive regulation of cell division; angiogenesis; positive regulation of cell population proliferation; positive regulation of transcription by RNA polymerase II; positive regulation of cell migration; positive regulation of ERK1 and ERK2 cascade; cellular response to heat; positive regulation of gene expression; anatomical structure morphogenesis; ani…	growth factor activity; protein binding; heparin binding; integrin binding; S100 protein binding; fibroblast growth factor receptor binding; Hsp70 protein binding	nucleus; cytoplasm; extracellular region; nucleoplasm; cytosol; cell cortex; extracellular space; extracellular matrix	-1.04672e-05	-0.407993	0.0401059	1
ENSG00000196576	29255	25500	21147	19527	21104	20009	21674	21104.4	21222.3	21849.4	22842.2	22060	17113.3	16663.5	16756.7	17251.8	18035.7	17418.1	472.109	455.374	462.38	476.708	495.361	474.038	22	50274979	50307646	1266.5	PLXNB2	protein_coding	plexin B2	semaphorin-plexin signaling pathway; regulation of cell migration; neural tube closure; regulation of cell shape; neuroblast proliferation; brain development; regulation of GTPase activity; regulation of protein phosphorylation; homophilic cell adhesion via plasma membrane adhesion molecules; negative regulation of cell adhesion; positive regulation of neuron projection development; positive regu…	protein binding; semaphorin receptor activity	membrane; plasma membrane; cell surface; extracellular exosome; semaphorin receptor complex	0.000233301	0.0606611	0.0401152	1
ENSG00000020577	1649	1595	1276	1211	1247	1298	1221.68	1320.06	1280.54	1355.03	1349.7	1431.05	1091.76	1179.68	1144.36	1210.93	1206.17	1278.87	30.1188	32.2377	31.5774	33.4608	33.1283	34.8047	14	54566117	54793315	1119	SAMD4A	protein_coding	sterile alpha motif domain containing 4A	negative regulation of translation; regulation of mRNA stability; regulation of translation; nuclear-transcribed mRNA poly(A) tail shortening; positive regulation of translation	protein binding; RNA binding; translation repressor activity; mRNA binding	cytoplasm; cell projection; cytosol; fibrillar center; dendrite; cell junction; synapse; neuron projection; P-body	4.59864e-05	0.114501	0.0403222	1
ENSG00000166250	9153	8264	6799	6149	6547	6792	6781.12	6839.47	6823.21	6880.32	7086.22	7488.21	9827.72	9912.27	9888.71	9971.48	10269.9	10852.5	271.12	270.879	272.867	275.535	282.069	295.353	11	123069872	123195248	690	CLMP	protein_coding	CXADR like membrane protein	digestive tract development	protein binding	membrane; cytoplasmic microtubule; plasma membrane; anchoring junction; cell surface; bicellular tight junction	6.27845e-05	0.0697248	0.0403699	1
ENSG00000224144	6	3	11	3	0	0	4.44518	2.48287	11.0392	3.3568	0	0	4.51287	2.52068	11.2073	3.40792	0	0	0.124498	0.068884	0.309252	0.0941688	0	0	22	22420326	22421310	985	ASH2LP1	processed_pseudogene	ASH2L pseudogene 1				-2.03466e-06	-2.41255	0.0404989	1
ENSG00000289884	27	19	12	4	6	9	20.0033	15.7248	12.0427	4.47573	6.49417	9.92254	25.4657	20.0189	15.3313	5.69794	8.26756	12.6321	0.70253	0.547068	0.423049	0.157448	0.227074	0.343787	3	164451246	164687874	785.5		lncRNA	novel transcript				-3.64279e-06	-1.20197	0.0406373	1
ENSG00000214331	0	0	0	1	1	4	0	0	0	1.11893	1.08236	4.41002	0	0	0	0.545555	0.527724	2.15018	0	0	0	0.015075	0.0144943	0.0585178	16	74332567	74360859	2051	PDPR2P	transcribed_unprocessed_pseudogene	pyruvate dehydrogenase phosphatase regulatory subunit 2, pseudogene				1.04384e-06	3.81588	0.0406374	1
ENSG00000111642	1016	967	798	752	855	754	752.717	800.31	800.842	841.438	925.419	831.289	350.427	372.584	372.831	391.731	430.828	387.006	9.66733	10.1818	10.2878	10.8244	11.833	10.5325	12	6570082	6614524	2148	CHD4	protein_coding	chromodomain helicase DNA binding protein 4	chromatin remodeling; chromatin organization; negative regulation of gene expression; double-strand break repair via homologous recombination; negative regulation of transcription by RNA polymerase II; positive regulation of DNA-templated transcription; negative regulation of DNA-templated transcription; regulation of cell fate specification; regulation of stem cell differentiation; regulation of…	DNA binding; ATP binding; ATP-dependent chromatin remodeler activity; metal ion binding; nucleotide binding; hydrolase activity; helicase activity; protein binding; ATP hydrolysis activity; chromatin binding; histone binding; RNA polymerase II-specific DNA-binding transcription factor binding; transcription corepressor activity; zinc ion binding; histone deacetylase binding; nucleosomal DNA bindi…	nucleus; nucleoplasm; cytoplasm; membrane; protein-containing complex; cytoskeleton; chromatin; chromosome, telomeric region; centrosome; NuRD complex; RNA polymerase II transcription regulator complex; site of DNA damage; cerebellar granule cell to Purkinje cell synapse	0.000281275	0.143998	0.0407426	1
ENSG00000185278	1172	1021	945	723	751	719	868.292	845.002	948.365	808.989	812.853	792.701	321.828	313.196	351.507	299.848	301.28	293.811	8.87836	8.55889	9.69942	8.28549	8.27486	7.99614	1	173868082	173903547	2698	ZBTB37	protein_coding	zinc finger and BTB domain containing 37	regulation of cytokine production; negative regulation of transcription by RNA polymerase II; regulation of immune system process	protein binding; metal ion binding; DNA binding; RNA polymerase II cis-regulatory region sequence-specific DNA binding; DNA-binding transcription factor activity, RNA polymerase II-specific; sequence-specific double-stranded DNA binding; DNA-binding transcription repressor activity, RNA polymerase II-specific	nucleus; chromatin; nucleoplasm	-4.4832e-05	-0.138173	0.040956	1
ENSG00000116001	3871	3391	2974	2390	2599	2399	2867.88	2806.47	2984.59	2674.25	2813.06	2644.91	4595.97	4497.54	4783	4285.66	4508.1	4238.64	126.79	122.907	131.981	118.423	123.818	115.356	2	70209444	70248660	624	TIA1	protein_coding	TIA1 cytotoxic granule associated RNA binding protein	mRNA processing; RNA splicing; apoptotic process; negative regulation of translation; regulation of alternative mRNA splicing, via spliceosome; stress granule assembly; protein localization to cytoplasmic stress granule; regulation of mRNA splicing, via spliceosome; negative regulation of cytokine production; positive regulation of epithelial cell apoptotic process	RNA binding; nucleic acid binding; protein binding; mRNA 3'-UTR binding; poly(A) binding; mRNA 3'-UTR AU-rich region binding	nucleus; cytoplasm; nucleoplasm; cytosol; cytoplasmic stress granule; nuclear stress granule; ribonucleoprotein complex	-4.85231e-05	-0.0896207	0.0409706	1
ENSG00000089154	10274	9203	7715	6954	7590	7267	7611.63	7616.6	7742.47	7781.06	8215.12	8011.9	14017.7	14026.9	14258.7	14329.8	15129.1	14754.9	386.711	383.322	393.452	395.965	415.532	401.558	12	120127202	120194715	543	GCN1	protein_coding	GCN1 activator of EIF2AK4	regulation of translation; cellular response to amino acid starvation; rescue of stalled ribosome; cellular response to leucine starvation; GCN2-mediated signaling	RNA binding; cadherin binding; protein serine/threonine kinase activator activity; molecular adaptor activity; translation factor activity, RNA binding; protein kinase regulator activity	cytoplasm; membrane; cytosol; ribosome; cytosolic ribosome; polysome	3.42488e-05	0.0640288	0.0411331	1
ENSG00000153140	938	821	680	589	567	520	694.93	679.477	682.421	659.052	613.699	573.302	865.956	846.701	850.369	821.248	764.734	714.396	23.8894	23.1383	23.465	22.693	21.0039	19.4425	5	90392257	90409766	802.5	CETN3	protein_coding	centrin 3	mRNA transport; protein transport; cell division; cell cycle; centrosome cycle	calcium ion binding; metal ion binding; protein binding; microtubule binding; G-protein beta/gamma-subunit complex binding	nucleus; cytoplasm; centriole; centrosome; cytoskeleton; nuclear envelope; nucleolus; nuclear pore; transcription export complex 2; microtubule organizing center; photoreceptor connecting cilium; ciliary transition zone; ciliary basal body; nuclear pore nuclear basket	-2.75632e-05	-0.156546	0.0412697	1
ENSG00000185340	1903	1818	1471	1424	1414	1450	1409.86	1504.62	1476.24	1593.36	1530.46	1598.63	697.779	744.675	730.63	788.597	757.465	791.206	19.2498	20.3502	20.1609	21.7908	20.8043	21.5329	22	29306618	29312787	2020.5	GAS2L1	protein_coding	growth arrest specific 2 like 1	microtubule bundle formation; cellular response to starvation; regulation of microtubule polymerization or depolymerization; actin crosslink formation; protein localization to microtubule plus-end	protein binding; microtubule binding; actin filament binding; cytoskeletal anchor activity	cytoplasm; cytoskeleton; stress fiber; actin filament; microtubule plus-end; microtubule	4.09481e-05	0.105804	0.0413133	1
ENSG00000287812	3	2	3	0	0	0	2.22259	1.65524	3.01068	0	0	0	0.738648	0.550097	1.00056	0	0	0	0.0203773	0.0150329	0.0276093	0	0	0	8	22698384	22703776	3009		lncRNA	novel transcript				-1.1757e-06	-3.49387	0.0413765	1
ENSG00000111186	402	358	298	314	328	297	297.827	296.289	299.061	351.345	355.015	327.444	346.109	344.321	347.543	408.303	412.568	380.527	9.54822	9.40948	9.59006	11.2824	11.3315	10.3562	12	1529891	1647212	860.5	WNT5B	protein_coding	Wnt family member 5B	multicellular organism development; Wnt signaling pathway; fat cell differentiation; positive regulation of cell migration; neuron differentiation; cellular response to retinoic acid; canonical Wnt signaling pathway; chondrocyte differentiation; cell fate commitment; lens fiber cell development; muscle cell differentiation; positive regulation of convergent extension involved in gastrulation; pos…	signaling receptor binding; cytokine activity; frizzled binding	extracellular region; extracellular space; plasma membrane; extracellular exosome; collagen-containing extracellular matrix; endoplasmic reticulum lumen; endocytic vesicle membrane; Golgi lumen	2.04903e-05	0.211149	0.0413848	1
ENSG00000182446	11630	10604	8796	8209	8383	8317	8616.24	8776.1	8827.32	9185.32	9073.43	9169.53	15223	15505.5	15596	16228.5	16030.8	16200.6	419.962	423.728	430.353	448.431	440.297	440.904	17	81556887	81648465	566	NPLOC4	protein_coding	NPL4 homolog, ubiquitin recognition factor	ubiquitin-dependent protein catabolic process; proteasome-mediated ubiquitin-dependent protein catabolic process; Golgi organization; retrograde protein transport, ER to cytosol; negative regulation of type I interferon production; ubiquitin-dependent ERAD pathway; negative regulation of RIG-I signaling pathway	metal ion binding; protein binding; ubiquitin protein ligase binding; K48-linked polyubiquitin modification-dependent protein binding; ubiquitin binding; protein-containing complex binding; ATPase binding; K63-linked polyubiquitin modification-dependent protein binding	nucleus; cytoplasm; endoplasmic reticulum; cytosol; VCP-NPL4-UFD1 AAA ATPase complex; UFD1-NPL4 complex; nucleoplasm; nuclear outer membrane-endoplasmic reticulum membrane network	0.000186559	0.0652254	0.0414272	1
ENSG00000092969	991	961	761	729	763	813	734.196	795.344	763.71	815.702	825.842	896.336	223.806	242.446	232.803	248.652	251.743	273.232	6.1742	6.62547	6.42392	6.87084	6.91428	7.43608	1	218345336	218444619	3280.5	TGFB2	protein_coding	transforming growth factor beta 2	positive regulation of immune response; positive regulation of cell division; signaling; positive regulation of cell population proliferation; heart development; tissue development; neutrophil chemotaxis; negative regulation of cell population proliferation; neuron development; embryo development; response to chemical; eye development; hair follicle development; transforming growth factor beta re…	growth factor activity; transforming growth factor beta receptor binding; protein binding; protein homodimerization activity; signaling receptor binding; amyloid-beta binding; type II transforming growth factor beta receptor binding; type III transforming growth factor beta receptor binding; cytokine activity	extracellular region; extracellular space; axon; collagen-containing extracellular matrix; platelet alpha granule lumen; neuronal cell body	2.77476e-05	0.146841	0.0415039	1
ENSG00000225806	16	8	8	5	2	0	11.8538	6.62097	8.02849	5.59467	2.16472	0	16.3614	9.13868	11.0814	7.72211	2.98788	0	0.451366	0.249738	0.305779	0.21338	0.0820643	0	20	58863528	58888809	724.5		lncRNA	novel transcript, antisense to GNAS				-2.53852e-06	-1.78442	0.0416382	1
ENSG00000130414	4895	4344	3750	3124	3196	3135	3626.53	3595.19	3763.35	3495.55	3459.23	3456.35	1214.31	1203.81	1260.12	1170.45	1158.29	1157.33	33.4994	32.8973	34.7716	32.3423	31.8132	31.4969	2	239892450	240025743	2986.5	NDUFA10	protein_coding	NADH:ubiquinone oxidoreductase subunit A10	mitochondrial electron transport, NADH to ubiquinone; mitochondrial respiratory chain complex I assembly; aerobic respiration; proton motive force-driven mitochondrial ATP synthesis	NADH dehydrogenase (ubiquinone) activity	mitochondrion; mitochondrial matrix; respirasome; mitochondrial respiratory chain complex I; cytoplasm; mitochondrial inner membrane	-0.000139211	-0.0766926	0.0417859	1
ENSG00000222011	314	271	239	169	191	169	232.631	224.285	239.851	189.1	206.731	186.323	171.81	165.647	177.143	139.66	152.682	137.61	4.73978	4.52673	4.88804	3.85914	4.19351	3.74508	7	102748971	102809225	1354	FAM185A	protein_coding	family with sequence similarity 185 member A		protein binding		-1.54816e-05	-0.25789	0.0418652	1
ENSG00000228887	1	1	1	6	3	4	0.740863	0.827622	1.00356	6.7136	3.24708	4.41002	0.826857	0.923685	1.12005	7.49286	3.62398	4.9219	0.0228107	0.0252421	0.0309064	0.207045	0.099535	0.133951	19	14070342	14071237	896	EEF1DP1	processed_pseudogene	eukaryotic translation elongation factor 1 delta pseudogene 1				1.89247e-06	2.49586	0.0419309	1
ENSG00000121281	2828	2443	2043	1932	2148	1940	2095.16	2021.88	2050.27	2161.78	2324.91	2138.86	1445.44	1394.88	1414.47	1491.4	1603.94	1475.58	39.8757	38.1188	39.0307	41.2108	44.0533	40.1584	16	50246137	50318135	1449.5	ADCY7	protein_coding	adenylate cyclase 7	intracellular signal transduction; cyclic nucleotide biosynthetic process; cAMP biosynthetic process; adenylate cyclase-activating G protein-coupled receptor signaling pathway; adenylate cyclase-inhibiting G protein-coupled receptor signaling pathway; negative regulation of cytokine production involved in inflammatory response; regulation of adaptive immune response; cellular response to lithium …	metal ion binding; ATP binding; lyase activity; adenylate cyclase activity; phosphorus-oxygen lyase activity; nucleotide binding	membrane; plasma membrane	1.82745e-05	0.103278	0.0419903	1
ENSG00000103260	1863	1618	1277	1388	1402	1193	1380.23	1339.09	1281.55	1553.08	1517.47	1315.29	1807.77	1753.89	1678.52	2034.16	1987.52	1722.71	49.8713	47.9295	46.3167	56.2086	54.5886	46.884	16	715118	719655	763.5	METRN	protein_coding	meteorin, glial cell differentiation regulator	signal transduction; cell differentiation; nervous system development; glial cell differentiation; positive regulation of axonogenesis; axonogenesis; radial glial cell differentiation	hormone activity	extracellular region; extracellular space	3.79592e-05	0.131314	0.0419965	1
ENSG00000132522	105	92	57	87	89	82	77.7907	76.1412	57.203	97.3472	96.3302	90.4054	79.3378	77.6555	58.3406	99.2832	98.246	92.2034	2.18871	2.12214	1.60984	2.74343	2.69839	2.50934	17	7311324	7315564	980.5	GPS2	protein_coding	G protein pathway suppressor 2	negative regulation of transcription by RNA polymerase II; regulation of lipid metabolic process; positive regulation of transcription by RNA polymerase II; regulation of transcription by RNA polymerase II; negative regulation of inflammatory response; negative regulation of JNK cascade; negative regulation of fat cell differentiation; negative regulation of B cell receptor signaling pathway; B c…	protein binding; transcription coactivator activity; transcription coregulator activity; GTPase inhibitor activity; transcription corepressor activity; cyclin binding	nucleus; cytoplasm; mitochondrion; cytosol; transcription regulator complex; nucleoplasm; transcription repressor complex	9.80858e-06	0.419165	0.0421822	1
ENSG00000242247	4134	3803	2936	2520	2599	2710	3062.73	3147.45	2946.45	2819.71	2813.06	2987.79	4384.72	4506.01	4218.26	4036.81	4027.28	4277.43	120.963	123.138	116.398	111.547	110.612	116.412	22	42796502	42858106	698.5	ARFGAP3	protein_coding	ADP ribosylation factor GTPase activating protein 3	intracellular protein transport; protein transport; vesicle-mediated transport; protein secretion; COPI coating of Golgi vesicle	GTPase activator activity; metal ion binding; protein binding	cytoplasm; membrane; Golgi apparatus; cytosol; Golgi membrane	-5.27457e-05	-0.0878068	0.0422223	1
ENSG00000184357	4	5	5	7	7	16	2.96345	4.13811	5.0178	7.83253	7.57653	17.6401	3.71826	5.19211	6.29587	9.82752	9.50631	22.1331	0.102577	0.141888	0.173727	0.271557	0.261097	0.602358	6	27866792	27867588	797	H1-5	protein_coding	H1.5 linker histone, cluster member	nucleosome assembly; negative regulation of transcription by RNA polymerase II; chromatin organization; protein stabilization; establishment of protein localization to chromatin; chromosome condensation; negative regulation of DNA recombination; muscle organ development	DNA binding; structural constituent of chromatin; RNA binding; chromatin DNA binding; protein binding; double-stranded DNA binding; histone deacetylase binding; nucleosomal DNA binding	nucleosome; nucleus; nucleoplasm; nucleolus; chromosome; chromatin; heterochromatin	2.93673e-06	1.46524	0.0423604	1
ENSG00000291100	1454	1219	1102	874	886	892	1077.22	1008.87	1105.92	977.947	958.972	983.434	1031.32	965.889	1058.81	936.283	918.116	941.536	28.4514	26.3954	29.2166	25.8717	25.2167	25.6242	20	28563850	28602858	1044.5		lncRNA	novel transcript				-3.86512e-05	-0.127453	0.0423796	1
ENSG00000162408	1420	1499	976	844	936	900	1052.03	1240.6	979.475	944.379	1013.09	992.254	1439.16	1697.13	1339.91	1291.9	1385.9	1357.39	39.7025	46.3786	36.9733	35.6983	38.0646	36.9418	1	6521347	6554513	731	NOL9	protein_coding	nucleolar protein 9	RNA processing; phosphorylation; rRNA processing; maturation of 5.8S rRNA; cleavage in ITS2 between 5.8S rRNA and LSU-rRNA of tricistronic rRNA transcript (SSU-rRNA, 5.8S rRNA, LSU-rRNA)	polynucleotide 5'-hydroxyl-kinase activity; RNA binding; nucleotide binding; ATP binding; kinase activity; transferase activity; protein binding; polydeoxyribonucleotide 5'-hydroxyl-kinase activity	nucleus; membrane; nucleolus; intermediate filament cytoskeleton; nucleoplasm	-1.11727e-06	-0.151131	0.042405	1
ENSG00000157654	14636	12434	10558	9778	10837	9720	10843.3	10290.6	10595.6	10940.9	11729.5	10716.3	7646.88	7257.16	7472.21	7715.75	8271.9	7557.37	210.957	198.321	206.187	213.204	227.193	205.676	9	109498325	110172512	1418	PALM2AKAP2	protein_coding	PALM2 and AKAP2 fusion	regulation of cell shape		membrane; plasma membrane; side of membrane; apical plasma membrane	5.83571e-05	0.0734223	0.0425546	1
ENSG00000145214	1113	984	841	823	834	814	824.581	814.38	843.995	920.882	902.689	897.439	1008.05	995.574	1031.78	1125.77	1103.53	1097.11	27.8092	27.2067	28.4707	31.1077	30.3093	29.8583	4	958887	986895	818	DGKQ	protein_coding	diacylglycerol kinase theta	signal transduction; protein kinase C-activating G protein-coupled receptor signaling pathway; lipid metabolic process; phosphorylation; G protein-coupled receptor signaling pathway; regulation of transcription by RNA polymerase II; platelet activation; glycerolipid metabolic process; regulation of synaptic vesicle endocytosis; intracellular signal transduction; cAMP-mediated signaling; positive …	kinase activity; diacylglycerol kinase activity; metal ion binding; nucleotide binding; ATP binding; transferase activity; protein binding; DNA-binding transcription factor binding; kinase binding; transmembrane receptor protein tyrosine kinase activator activity; phospholipase binding	nucleus; cytoplasm; nuclear speck; membrane; nucleolus; plasma membrane; cytoskeleton; cytosol; synapse; nuclear matrix; presynapse; postsynapse; glutamatergic synapse; vesicle membrane; endosome	3.22008e-05	0.132734	0.0426767	1
ENSG00000091136	23980	21215	18162	16353	17489	16780	17765.9	17558	18226.7	18297.9	18929.4	18500	4295.43	4245.16	4406.84	4424.06	4576.74	4472.93	118.499	116.01	121.602	122.247	125.703	121.732	7	107923799	108003213	4136	LAMB1	protein_coding	laminin subunit beta 1	cell adhesion; positive regulation of cell migration; neuron projection development; substrate adhesion-dependent cell spreading; positive regulation of epithelial cell proliferation; endodermal cell differentiation; neuronal-glial interaction involved in cerebral cortex radial glia guided migration; odontogenesis; positive regulation of cell adhesion; positive regulation of muscle cell different…	protein binding; structural molecule activity; extracellular matrix structural constituent	membrane; basement membrane; extracellular region; perinuclear region of cytoplasm; extracellular space; extracellular exosome; collagen-containing extracellular matrix; endoplasmic reticulum lumen; laminin-10 complex; protein complex involved in cell-matrix adhesion; laminin-1 complex; laminin-2 complex; laminin-8 complex	7.41881e-05	0.0577016	0.0426923	1
ENSG00000224893	0	0	0	2	3	1	0	0	0	2.23787	3.24708	1.1025	0	0	0	1.81277	2.63028	0.893078	0	0	0	0.0500911	0.0722425	0.0243054	6	152754903	152875991	1234.5	LINC02840	lncRNA	long intergenic non-protein coding RNA 2840				1.02044e-06	3.81208	0.0428174	1
ENSG00000102178	2263	2067	1571	1603	1626	1607	1676.57	1710.69	1576.59	1793.65	1759.92	1771.73	2358.05	2406.04	2217.43	2522.71	2475.27	2491.88	65.0522	65.7513	61.1875	69.7085	67.9851	67.8172	X	154483717	154486615	711	UBL4A	protein_coding	ubiquitin like 4A	post-translational protein targeting to endoplasmic reticulum membrane; tail-anchored membrane protein insertion into ER membrane; protein modification process; ubiquitin-dependent protein catabolic process; regulation of protein stability	protein binding; chaperone binding; ubiquitin-like protein transferase activity	nucleus; cytoplasm; nucleoplasm; cytosol; membrane; BAT3 complex	0.00014663	0.0997811	0.0428901	1
ENSG00000160606	1028	922	712	624	637	582	761.608	763.067	714.535	698.214	689.464	641.658	1118.37	1120.51	1049.24	1025.28	1012.43	942.229	30.8527	30.6209	28.9527	28.3308	27.8071	25.643	17	28724348	28727935	681	TLCD1	protein_coding	TLC domain containing 1	plasma membrane organization; phospholipid homeostasis; membrane assembly; regulation of membrane lipid distribution	protein binding	membrane; plasma membrane	-1.31274e-05	-0.14372	0.0429465	1
ENSG00000014641	8862	7946	6572	5623	5648	5755	6565.53	6576.28	6595.4	6291.76	6113.18	6344.91	7719.61	7732.25	7754.74	7397.72	7187.74	7460.22	212.963	211.304	213.983	204.416	197.416	203.032	2	63588609	63607197	850.5	MDH1	protein_coding	malate dehydrogenase 1	malate metabolic process; carboxylic acid metabolic process; tricarboxylic acid cycle; gluconeogenesis; NADH metabolic process; NADP metabolic process; oxaloacetate metabolic process	catalytic activity; oxidoreductase activity; malate dehydrogenase activity; oxidoreductase activity, acting on the CH-OH group of donors, NAD or NADP as acceptor; L-malate dehydrogenase activity; protein binding; hydroxyphenylpyruvate reductase activity; malic enzyme activity; diiodophenylpyruvate reductase activity	cytoplasm; cytosol; centrosome; extracellular space; extracellular exosome	-5.08348e-05	-0.0740349	0.0430131	1
ENSG00000139514	1287	952	840	825	980	806	953.491	787.896	842.991	923.12	1060.71	888.619	1313.35	1085.26	1161.14	1271.51	1461.04	1223.99	36.2317	29.6575	32.0404	35.135	40.1284	33.3113	13	29509414	29595688	726	SLC7A1	protein_coding	solute carrier family 7 member 1	transmembrane transport; amino acid transport; viral entry into host cell; L-ornithine transmembrane transport; L-lysine transmembrane transport; L-arginine transmembrane transport; transport across blood-brain barrier; amino acid import across plasma membrane; L-arginine import across plasma membrane; positive regulation of T cell proliferation; L-amino acid transport; lysine transport; ornithin…	transmembrane transporter activity; protein binding; L-ornithine transmembrane transporter activity; virus receptor activity; L-lysine transmembrane transporter activity; L-arginine transmembrane transporter activity; amino acid transmembrane transporter activity; L-histidine transmembrane transporter activity; basic amino acid transmembrane transporter activity	membrane; plasma membrane; protein-containing complex; apical plasma membrane; basolateral plasma membrane; basal plasma membrane	2.90692e-05	0.15092	0.043048	1
ENSG00000146242	1745	1823	1459	1342	1302	1660	1292.81	1508.75	1464.2	1501.61	1409.23	1830.16	447.338	522.06	506.642	519.588	487.624	633.273	12.3408	14.2667	13.9802	14.3574	13.3929	17.2347	6	82363206	82367420	2890	TPBG	protein_coding	trophoblast glycoprotein	negative regulation of canonical Wnt signaling pathway; cell adhesion; negative regulation of cell population proliferation; olfactory learning; positive regulation of chemotaxis; positive regulation of protein kinase B signaling; synaptic transmission, GABAergic; positive regulation of synapse assembly; cell chemotaxis; positive regulation of ERK1 and ERK2 cascade; protein localization to plasma…	protein binding	membrane; plasma membrane; cell surface; cytoplasm; endoplasmic reticulum; dendrite; axon terminus	2.77613e-05	0.153382	0.043055	1
ENSG00000181458	2741	2438	2019	1607	1712	1810	2030.71	2017.74	2026.19	1798.13	1853	1995.53	2323.46	2308.63	2318.29	2057.35	2120.14	2283.22	64.098	63.0893	63.9706	56.8495	58.2311	62.1385	3	100492619	100577444	874	TMEM45A	protein_coding	transmembrane protein 45A		protein binding	membrane	-4.03945e-05	-0.105367	0.0431762	1
ENSG00000080546	4546	3960	3355	2818	2909	2862	3367.97	3277.38	3366.95	3153.15	3148.59	3155.37	3660.83	3562.37	3659.72	3427.34	3422.38	3429.75	100.992	97.3511	100.986	94.7055	93.998	93.3416	6	108984309	109094846	920	SESN1	protein_coding	sestrin 1	regulation of response to reactive oxygen species; cellular response to stimulus; cellular response to amino acid starvation; reactive oxygen species metabolic process; negative regulation of TORC1 signaling; cellular response to glucose starvation; positive regulation of macroautophagy; cellular response to leucine; cellular oxidant detoxification; cellular response to leucine starvation	oxidoreductase activity; protein binding; oxidoreductase activity, acting on peroxide as acceptor; leucine binding	nucleus; cytoplasm; nucleoplasm; fibrillar center; cytosol; GATOR2 complex	-5.17575e-05	-0.0822186	0.0432202	1
ENSG00000189275	299	275	221	245	250	222	221.518	227.596	221.787	274.139	270.59	244.756	106.91	109.844	107.04	132.306	130.594	118.126	2.94937	3.00176	2.95365	3.65593	3.58685	3.21482	10	131772383	131790199	2072	LINC01164	lncRNA	long intergenic non-protein coding RNA 1164				3.60693e-06	0.23468	0.0432302	1
ENSG00000111424	696	501	423	458	503	440	515.641	414.638	424.506	512.471	544.428	485.102	198.859	159.907	163.712	197.636	209.961	187.081	5.48598	4.36987	4.51745	5.46116	5.76671	5.09147	12	47841537	47943048	2593	VDR	protein_coding	vitamin D receptor	regulation of DNA-templated transcription; intracellular receptor signaling pathway; positive regulation of transcription by RNA polymerase II; negative regulation of transcription by RNA polymerase II; cell differentiation; positive regulation of gene expression; skeletal system development; calcium ion transport; cellular calcium ion homeostasis; lactation; animal organ morphogenesis; intestina…	DNA binding; zinc ion binding; DNA-binding transcription factor activity; sequence-specific DNA binding; nuclear receptor activity; protein binding; metal ion binding; RNA polymerase II cis-regulatory region sequence-specific DNA binding; DNA-binding transcription factor activity, RNA polymerase II-specific; nuclear retinoid X receptor binding; vitamin D response element binding; lithocholic acid…	nucleus; cytoplasm; nucleoplasm; cytosol; chromatin; RNA polymerase II transcription regulator complex; receptor complex	2.32831e-05	0.182688	0.0432658	1
ENSG00000136950	2197	1972	1444	1500	1534	1588	1627.68	1632.07	1449.14	1678.4	1660.34	1750.78	867.169	869.51	772.052	894.193	884.572	932.753	23.9228	23.7616	21.3039	24.7087	24.2954	25.3851	9	124862130	124877733	1877	ARPC5L	protein_coding	actin related protein 2/3 complex subunit 5 like	Arp2/3 complex-mediated actin nucleation; regulation of actin filament polymerization; cell migration	actin binding; protein binding; actin filament binding	actin cytoskeleton; Arp2/3 protein complex; cytoplasm; cytoskeleton; focal adhesion; synapse; glutamatergic synapse; extracellular exosome	3.1527e-05	0.109697	0.0434382	1
ENSG00000111669	48660	43235	34552	29845	31823	31560	36050.4	35782.2	34675	33394.6	34444	34795	43460.4	43137.1	41802.3	40258.7	41523.8	41947	1198.95	1178.83	1153.49	1112.44	1140.48	1141.6	12	6867119	6870948	829.5	TPI1	protein_coding	triosephosphate isomerase 1	glycolytic process; gluconeogenesis; glyceraldehyde-3-phosphate biosynthetic process; methylglyoxal biosynthetic process; glycerol catabolic process; glucose metabolic process; glyceraldehyde-3-phosphate metabolic process; canonical glycolysis	triose-phosphate isomerase activity; isomerase activity; lyase activity; protein homodimerization activity; protein binding; ubiquitin protein ligase binding; methylglyoxal synthase activity	nucleus; cytoplasm; extracellular space; cytosol; extracellular exosome	-0.00023581	-0.0535858	0.043459	1
ENSG00000158292	5354	5072	4062	3909	4276	3669	3966.58	4197.7	4076.46	4373.91	4628.18	4045.09	944.874	999.928	971.049	1041.9	1102.47	963.575	26.0665	27.3256	26.795	28.7902	30.2801	26.224	1	6247353	6261098	4198	GPR153	protein_coding	G protein-coupled receptor 153	G protein-coupled receptor signaling pathway; signal transduction	G protein-coupled receptor activity	membrane; plasma membrane	4.81632e-05	0.0923167	0.0436116	1
ENSG00000099337	1378	1161	991	984	940	1024	1020.91	960.869	994.529	1101.03	1017.42	1128.96	329.432	310.058	320.919	355.286	328.306	364.3	9.08814	8.47314	8.85539	9.81738	9.01714	9.91452	19	38319845	38332076	3099	KCNK6	protein_coding	potassium two pore domain channel subfamily K member 6	potassium ion transport; potassium ion transmembrane transport; monoatomic ion transport; monoatomic ion transmembrane transport; regulation of systemic arterial blood pressure; negative regulation of systemic arterial blood pressure; regulation of resting membrane potential; stabilization of membrane potential	potassium channel activity; inward rectifier potassium channel activity; outward rectifier potassium channel activity; potassium ion leak channel activity	membrane; plasma membrane; voltage-gated potassium channel complex; ion channel complex	3.37955e-05	0.125132	0.0438124	1
ENSG00000099904	2815	2505	2035	2026	2093	1892	2085.53	2073.19	2042.25	2266.96	2265.38	2085.94	2294.31	2280.74	2246.7	2493.9	2492.17	2294.76	63.2939	62.3272	61.995	68.9124	68.4491	62.4526	22	20129456	20148007	909	ZDHHC8	protein_coding	zinc finger DHHC-type palmitoyltransferase 8	positive regulation of protein localization to plasma membrane; positive regulation of cholesterol efflux; protein palmitoylation; high-density lipoprotein particle assembly; peptidyl-L-cysteine S-palmitoylation; positive regulation by host of viral process; locomotory behavior	palmitoyltransferase activity; transferase activity; acyltransferase activity; protein-cysteine S-palmitoyltransferase activity	membrane; Golgi apparatus; mitochondrion; Golgi membrane; mitochondrial membrane; cytosol	4.45875e-05	0.0935378	0.0439338	1
ENSG00000230551	628	601	514	380	424	376	465.262	497.401	515.83	425.195	458.921	414.542	53.8747	57.5962	59.7302	49.2351	53.1405	48.0016	1.48626	1.57397	1.64819	1.36048	1.45954	1.30638	5	149494314	149504670	8636		lncRNA	novel transcript				-2.26511e-05	-0.184601	0.0439381	1
ENSG00000084092	1892	1723	1389	1343	1434	1359	1401.71	1425.99	1393.95	1502.73	1552.11	1498.3	631.972	642.918	628.47	677.514	699.777	675.52	17.4344	17.5694	17.3419	18.7213	19.2199	18.3845	4	56963350	56977606	2218	NOA1	protein_coding	nitric oxide associated 1	apoptotic process; mitochondrion organization; mitochondrial ribosome assembly	GTP binding; RNA binding; nucleotide binding; protein binding	membrane; mitochondrion; mitochondrial inner membrane; matrix side of mitochondrial inner membrane; extrinsic component of mitochondrial inner membrane	3.86697e-05	0.108938	0.0442483	1
ENSG00000259460	9	10	11	2	3	3	6.66777	8.27622	11.0392	2.23787	3.24708	3.30751	14.3702	17.8367	23.7913	4.82299	6.99803	7.12826	0.396435	0.487434	0.656494	0.133271	0.192206	0.193998	15	37099339	37100173	464		lncRNA	novel transcript, antisense to MEIS2				-2.89891e-06	-1.54841	0.0442522	1
ENSG00000233237	641	668	553	392	406	463	474.893	552.851	554.969	438.622	439.439	510.46	637.441	742.082	744.925	588.754	589.851	685.181	17.5853	20.2793	20.5553	16.2687	16.2006	18.6474	6	71187161	71420745	745	LINC00472	lncRNA	long intergenic non-protein coding RNA 472	miRNA-mediated gene silencing		RISC complex	-2.26203e-05	-0.18606	0.0443083	1
ENSG00000116017	792	784	636	647	632	615	586.764	648.855	638.265	723.95	684.052	678.04	1040.36	1150.45	1131.68	1283.6	1212.86	1202.2	28.7007	31.4391	31.2273	35.4689	33.312	32.7182	19	925781	975939	564	ARID3A	protein_coding	AT-rich interaction domain 3A	regulation of transcription by RNA polymerase II; regulation of DNA-templated transcription; positive regulation of transcription by RNA polymerase II	DNA binding; protein binding; chromatin binding; transcription coregulator activity; identical protein binding	nucleus; cytoplasm; nucleoplasm; cytosol; membrane raft	1.19816e-05	0.156256	0.0443866	1
ENSG00000164972	4	22	10	0	2	6	2.96345	18.2077	10.0356	0	2.16472	6.61503	4.7644	29.2728	16.1344	0	3.48026	10.6351	0.131437	0.799956	0.445211	0	0.0955877	0.289437	9	34379019	34397828	622	SPMIP6	protein_coding	sperm microtubule inner protein 6	cell differentiation; spermatogenesis; protein-containing complex assembly	protein binding; alpha-tubulin binding	nucleus; cytoplasm; cell projection; nucleoplasm; cytosol; cilium; motile cilium; mitochondrion; cytoskeleton; perinuclear region of cytoplasm; sperm midpiece; manchette	-2.33273e-06	-1.82111	0.0445223	1
ENSG00000123064	4408	3877	3178	2991	3109	3170	3265.73	3208.69	3189.32	3346.73	3365.06	3494.94	4838.11	4753.61	4724.91	4958.12	4985.28	5177.69	133.47	129.905	130.378	137.004	136.924	140.912	12	113157173	113185479	675	DDX54	protein_coding	DEAD-box helicase 54	negative regulation of DNA-templated transcription; RNA processing; RNA metabolic process; intracellular estrogen receptor signaling pathway; rRNA processing	ATP binding; RNA binding; nucleic acid binding; RNA helicase activity; nucleotide binding; hydrolase activity; helicase activity; signaling receptor binding; ATP hydrolysis activity; nuclear estrogen receptor binding; transcription corepressor activity	nucleus; membrane; Golgi apparatus; nucleoplasm; nucleolus	4.65391e-05	0.0784652	0.0445584	1
ENSG00000105135	2054	1921	1501	1575	1439	1522	1521.73	1589.86	1506.34	1762.32	1557.52	1678.01	1754.16	1832.69	1736.42	2031.49	1795.41	1934.31	48.3925	50.0831	47.9145	56.1349	49.3121	52.6427	19	15114984	15125786	867.5	ILVBL	protein_coding	ilvB acetolactate synthase like	lipid metabolic process; fatty acid metabolic process; fatty acid alpha-oxidation; isoleucine biosynthetic process; valine biosynthetic process	magnesium ion binding; catalytic activity; thiamine pyrophosphate binding; metal ion binding; lyase activity; protein binding; acetolactate synthase activity; flavin adenine dinucleotide binding	membrane; endoplasmic reticulum; endoplasmic reticulum membrane; acetolactate synthase complex	3.26294e-05	0.113417	0.0445646	1
ENSG00000176101	2219	2138	1681	1606	1619	1760	1643.98	1769.46	1686.99	1797.01	1752.34	1940.41	2073.11	2231.34	2127.35	2266.09	2209.76	2446.92	57.1915	60.9773	58.7017	62.6173	60.6927	66.5937	9	137188660	137190370	793	SSNA1	protein_coding	SS nuclear autoantigen 1	cell division; cell cycle; nervous system development; axonogenesis; intraciliary transport; axon extension; microtubule cytoskeleton organization; microtubule nucleation; axon arborization; receptor clustering	protein binding; identical protein binding; microtubule binding; protein self-association	nucleus; cytoplasm; cell projection; centriole; cilium; motile cilium; cytoskeleton; midbody; axon; centrosome; ciliary basal body; axoneme; plasma membrane; cytosol; supramolecular fiber	3.70587e-05	0.106296	0.0446044	1
ENSG00000140104	478	425	362	369	402	339	354.133	351.739	363.289	412.886	435.109	373.749	215.278	213.823	220.844	250.995	264.504	227.203	5.93894	5.84328	6.09394	6.93558	7.26478	6.1834	14	104985775	105010482	1645	CLBA1	protein_coding	clathrin binding box of aftiphilin containing 1	intracellular transport	clathrin binding	trans-Golgi network membrane; AP-1 adaptor complex	2.16804e-05	0.193453	0.044621	1
ENSG00000180900	5731	4955	3982	3841	4234	3863	4245.89	4100.87	3996.18	4297.82	4582.72	4258.98	2191.99	2117.12	2063.08	2218.8	2365.88	2198.75	60.4711	57.8559	56.9282	61.3108	64.9806	59.8396	8	143790920	143815773	1937	SCRIB	protein_coding	scribble planar cell polarity protein	cell differentiation; neural tube closure; cell migration; activation of GTPase activity; positive regulation of apoptotic process; positive regulation of type II interferon production; negative regulation of activated T cell proliferation; cell-cell adhesion; receptor clustering; negative regulation of mitotic cell cycle; positive chemotaxis; cell population proliferation; positive regulation of…	protein binding; cadherin binding; signaling adaptor activity	cytoplasm; cellular anatomical entity; membrane; cell projection; nucleoplasm; plasma membrane; anchoring junction; adherens junction; cell junction; synapse; postsynaptic membrane; lamellipodium; presynaptic membrane; presynapse; postsynapse; cell leading edge; extracellular exosome; postsynaptic density; cell-cell junction; basolateral plasma membrane; immunological synapse; Scrib-APC-beta-cate…	-4.68994e-05	0.0896779	0.0447864	1
ENSG00000233558	1	1	2	6	3	6	0.740863	0.827622	2.00712	6.7136	3.24708	6.61503	1.18919	1.32845	3.2217	10.7762	5.21201	10.618	0.0328064	0.0363033	0.0888992	0.297773	0.143151	0.288973	6	116258493	116259115	623		processed_pseudogene	RPS5 (40S Ribosomal Protein S5) pseudogene				1.94554e-06	2.26363	0.0448226	1
ENSG00000099812	14	21	14	22	18	30	10.3721	17.3801	14.0499	24.6165	19.4825	33.0751	5.49515	9.20798	7.44363	13.0419	10.3219	17.5233	0.151596	0.251632	0.205398	0.360378	0.283497	0.4769	19	751112	764318	1887.5	MISP	protein_coding	mitotic spindle positioning	cell division; cell cycle; establishment of mitotic spindle orientation; cell migration; mitotic spindle assembly; organelle localization; establishment of centrosome localization; regulation of protein localization to cell cortex	actin binding; protein binding; actin filament binding	cytoplasm; intracellular membrane-bounded organelle; plasma membrane; cytoskeleton; focal adhesion; anchoring junction; cell cortex; cortical actin cytoskeleton; actin filament; spindle pole centrosome; mitotic spindle astral microtubule end	4.69389e-06	0.889716	0.0448252	1
ENSG00000149295	254	256	185	186	232	213	188.179	211.871	185.659	208.122	251.108	234.834	130.725	147.184	128.974	144.579	174.441	163.135	3.60636	4.02218	3.5589	3.99506	4.79114	4.43978	11	113409605	113475691	1439.5	DRD2	protein_coding	dopamine receptor D2	G protein-coupled receptor signaling pathway; adenylate cyclase-inhibiting dopamine receptor signaling pathway; signal transduction; temperature homeostasis; response to hypoxia; neuron migration; negative regulation of protein phosphorylation; startle response; response to amphetamine; nervous system process involved in regulation of systemic arterial blood pressure; regulation of heart rate; re…	G protein-coupled receptor activity; dopamine neurotransmitter receptor activity; protein binding; dopamine neurotransmitter receptor activity, coupled via Gi/Go; signaling receptor binding; dopamine binding; ionotropic glutamate receptor binding; identical protein binding; protein-containing complex binding; organic cyclic compound binding; heterocyclic compound binding; potassium channel regula…	membrane; Golgi apparatus; plasma membrane; Golgi membrane; synapse; acrosomal vesicle; lateral plasma membrane; endocytic vesicle; axon; dendrite; synaptic vesicle membrane; sperm flagellum; presynaptic membrane; dendritic spine; perikaryon; axon terminus; postsynaptic membrane; dopaminergic synapse; glutamatergic synapse; GABA-ergic synapse; cilium; ciliary membrane; non-motile cilium; G protei…	1.77831e-05	0.244405	0.0450072	1
ENSG00000261559	0	0	0	1	1	4	0	0	0	1.11893	1.08236	4.41002	0	0	0	0.755525	0.730831	2.97773	0	0	0	0.0208769	0.0200728	0.0810398	15	34494420	34495900	1481	FSCN1P1	processed_pseudogene	fascin actin-bundling protein 1 pseudogene 1				9.9258e-07	3.8159	0.0451127	1
ENSG00000271924	6	7	4	1	0	1	4.44518	5.79335	4.01424	1.11893	0	1.1025	37.993	49.5158	34.3098	9.56353	0	9.42312	1.04812	1.35315	0.946738	0.264263	0	0.256453	2	161409554	161409670	117	RNA5SP108	rRNA_pseudogene	RNA, 5S ribosomal pseudogene 108				-1.88524e-06	-2.69444	0.0452209	1
ENSG00000156042	229	193	182	124	113	138	169.658	159.731	182.648	138.748	122.307	152.146	109	102.622	117.345	89.1408	78.5781	97.7486	3.007	2.80441	3.23801	2.46317	2.1582	2.66026	10	73253762	73358864	1556.5	CFAP70	protein_coding	cilia and flagella associated protein 70	cilium assembly; cilium movement	protein binding	cytoplasm; cell projection; cilium; motile cilium; cytoskeleton; axoneme; ciliary basal body; extracellular exosome; sperm flagellum; outer dynein arm	-8.50211e-06	-0.307613	0.0452337	1
ENSG00000134905	4558	4446	3624	3367	3353	3606	3376.86	3679.61	3636.9	3767.45	3629.16	3975.63	4569.49	4979.17	4921.39	5098.03	4910.9	5379.75	126.06	136.069	135.8	140.871	134.881	146.411	13	110641412	110713603	739	CARS2	protein_coding	cysteinyl-tRNA synthetase 2, mitochondrial	tRNA aminoacylation for protein translation; cysteinyl-tRNA aminoacylation; translation; tRNA metabolic process; gene expression	ATP binding; nucleotide binding; aminoacyl-tRNA ligase activity; cysteine-tRNA ligase activity; metal ion binding; ligase activity	mitochondrion; mitochondrial matrix; cytoplasm	6.15421e-05	0.0895157	0.0452363	1
ENSG00000240889	87	92	62	82	80	82	64.4551	76.1412	62.2208	91.7525	86.5889	90.4054	39.1111	46.2022	37.7553	55.6751	52.5418	54.8576	1.07897	1.2626	1.04181	1.53843	1.4431	1.49297	7	140695336	140697077	1648	NDUFB2-AS1	lncRNA	NDUFB2 antisense RNA 1				1.03591e-05	0.403738	0.0452462	1
ENSG00000106591	2348	2204	1735	1457	1509	1504	1739.55	1824.08	1741.18	1630.29	1633.28	1658.17	2189.49	2295.88	2191.54	2051.96	2055.74	2087.06	60.402	62.741	60.473	56.7006	56.4622	56.7999	7	42932376	42948958	794.5	MRPL32	protein_coding	mitochondrial ribosomal protein L32	translation; mitochondrial translation	structural constituent of ribosome; RNA binding; protein binding	ribosome; large ribosomal subunit; mitochondrion; ribonucleoprotein complex; mitochondrial inner membrane; mitochondrial ribosome; mitochondrial large ribosomal subunit	-2.11848e-05	-0.108284	0.0452708	1
ENSG00000275052	5579	4921	3984	3487	3566	3470	4133.28	4072.73	3998.19	3901.72	3859.7	3825.69	1133.8	1117.19	1096.75	1070.28	1058.76	1049.43	31.2785	30.5302	30.2634	29.5745	29.0795	28.5605	2	55547292	55618880	3645.5	PPP4R3B	protein_coding	protein phosphatase 4 regulatory subunit 3B	cellular response to DNA damage stimulus; regulation of double-strand break repair; gluconeogenesis; positive regulation of gluconeogenesis	protein phosphatase activator activity	nucleus; cytoplasm; nuclear speck; nucleoplasm; centrosome; cytoskeleton; chromatin; protein phosphatase 4 complex	-0.000450419	-0.075401	0.0454188	1
ENSG00000116157	273	252	170	208	222	207	202.256	208.561	170.605	232.738	240.284	228.218	192.441	198.44	162.327	221.444	228.624	217.144	5.30893	5.4229	4.47922	6.11903	6.27932	5.90964	1	52602371	52609051	1051	GPX7	protein_coding	glutathione peroxidase 7	response to oxidative stress; cellular oxidant detoxification; cellular response to oxidative stress	glutathione peroxidase activity; oxidoreductase activity; protein binding; peroxidase activity; catalase activity	extracellular region; endoplasmic reticulum; endoplasmic reticulum lumen	5.89087e-06	0.265695	0.0454272	1
ENSG00000119013	3363	3039	2388	1988	2086	2192	2491.52	2515.14	2396.5	2224.44	2257.81	2416.69	4489.23	4531.79	4318.02	4008	4068.12	4354.4	123.846	123.843	119.151	110.75	111.734	118.506	2	201071433	201085750	555	NDUFB3	protein_coding	NADH:ubiquinone oxidoreductase subunit B3	electron transport chain; mitochondrial respiratory chain complex I assembly; mitochondrial electron transport, NADH to ubiquinone; aerobic respiration; proton motive force-driven mitochondrial ATP synthesis	NADH dehydrogenase (ubiquinone) activity	mitochondrion; membrane; mitochondrial inner membrane; respirasome; mitochondrial respiratory chain complex I	-4.06287e-05	-0.102372	0.045632	1
ENSG00000235354	9	6	3	1	1	0	6.66777	4.96573	3.01068	1.11893	1.08236	0	38.9928	29.0394	17.6063	6.54347	6.3296	0	1.07571	0.793576	0.485826	0.180811	0.173847	0	7	103348601	103348771	171	RPS29P16	processed_pseudogene	ribosomal protein S29 pseudogene 16				-1.80444e-06	-2.74716	0.0457373	1
ENSG00000183873	955	826	567	629	766	623	707.525	683.615	569.019	703.809	829.089	686.86	98.6785	95.3439	79.3611	98.1602	115.633	95.7964	2.72227	2.60552	2.18988	2.7124	3.17594	2.60713	3	38548057	38649687	7170	SCN5A	protein_coding	sodium voltage-gated channel alpha subunit 5	monoatomic ion transport; transmembrane transport; sodium ion transport; monoatomic cation transmembrane transport; sodium ion transmembrane transport; monoatomic ion transmembrane transport; calcium ion import across plasma membrane; regulation of heart rate; cardiac muscle contraction; regulation of ventricular cardiac muscle cell membrane depolarization; cellular response to calcium ion; cardi…	monoatomic ion channel activity; voltage-gated sodium channel activity; monoatomic cation channel activity; sodium channel activity; protein binding; calmodulin binding; protein domain specific binding; transmembrane transporter binding; high voltage-gated calcium channel activity; scaffold protein binding; enzyme binding; protein kinase binding; ubiquitin protein ligase binding; ankyrin binding;…	membrane; plasma membrane; voltage-gated sodium channel complex; nucleoplasm; nucleolus; ion channel complex; cytoplasm; anchoring junction; perinuclear region of cytoplasm; cell surface; T-tubule; Z disc; endoplasmic reticulum; sarcolemma; voltage-gated calcium channel complex; lateral plasma membrane; caveola; intercalated disc	9.84056e-06	0.175873	0.0457625	1
ENSG00000105643	731	704	526	514	573	587	541.571	582.646	527.873	575.132	620.193	647.17	329.925	354.947	321.58	350.37	377.821	394.255	9.10172	9.69986	8.87362	9.68154	10.3771	10.7298	19	18001132	18014102	1641.5	ARRDC2	protein_coding	arrestin domain containing 2	protein transport	protein binding	cytoplasm; plasma membrane; cytoplasmic vesicle	1.64773e-05	0.156485	0.0457692	1
ENSG00000198794	104	61	55	34	44	38	77.0498	50.4849	55.1958	38.0437	47.6239	41.8952	130.262	85.3507	93.315	64.3174	80.5138	70.8287	3.59357	2.33243	2.57492	1.77724	2.21137	1.92762	15	74957219	75021495	591.5	SCAMP5	protein_coding	secretory carrier membrane protein 5	protein transport; exocytosis; response to endoplasmic reticulum stress; positive regulation of cytokine production; negative regulation of endocytosis; positive regulation of calcium ion-dependent exocytosis	protein binding; protein-containing complex binding	cellular anatomical entity; membrane; Golgi apparatus; cytoplasmic vesicle; plasma membrane; endosome; Golgi membrane; recycling endosome membrane; synapse; synaptic vesicle membrane; trans-Golgi network membrane	-8.00011e-06	-0.524827	0.0457984	1
ENSG00000253503	7	4	3	0	1	0	5.18604	3.31049	3.01068	0	1.08236	0	7.13349	4.55363	4.14124	0	1.48881	0	0.196794	0.12444	0.114273	0	0.040891	0	8	82514568	82677153	727		lncRNA	novel transcript				-1.33507e-06	-3.28931	0.0460002	1
ENSG00000197062	443	391	344	246	281	257	328.203	323.6	345.225	275.258	304.144	283.344	141.406	139.423	148.74	118.594	131.04	122.078	3.901	3.81009	4.1043	3.27704	3.5991	3.3224	6	28267058	28278224	2321	ZSCAN26	protein_coding	zinc finger and SCAN domain containing 26	regulation of DNA-templated transcription; regulation of transcription by RNA polymerase II	metal ion binding; DNA-binding transcription factor activity; protein binding; RNA polymerase II cis-regulatory region sequence-specific DNA binding; DNA-binding transcription factor activity, RNA polymerase II-specific	nucleus; nucleoplasm; cytosol	-2.00858e-05	-0.206779	0.046386	1
ENSG00000163349	4355	4171	3389	3191	3230	3287	3226.46	3452.01	3401.07	3570.52	3496.03	3623.93	813.53	870.401	857.556	900.281	881.5	913.75	22.4431	23.786	23.6633	24.8769	24.211	24.868	1	113929324	113977869	3966	HIPK1	protein_coding	homeodomain interacting protein kinase 1	protein phosphorylation; phosphorylation; eye development; smoothened signaling pathway; extrinsic apoptotic signaling pathway; positive regulation of angiogenesis; definitive hemopoiesis; endothelial cell apoptotic process; cell population proliferation; positive regulation of cell population proliferation; anterior/posterior pattern specification; regulation of tumor necrosis factor-mediated si…	ATP binding; protein kinase activity; nucleotide binding; protein serine/threonine kinase activity; kinase activity; transferase activity; protein binding; protein serine kinase activity; protein tyrosine kinase activity	nucleus; cytoplasm; nuclear speck; nucleoplasm; cytosol; centrosome; PML body	0.000144706	0.0854785	0.0463988	1
ENSG00000132432	4477	3760	3153	2584	2785	2844	3316.85	3111.86	3164.23	2891.32	3014.38	3135.52	6478.21	6077.85	6180.13	5647.12	5887.45	6124.07	178.716	166.093	170.534	156.043	161.703	166.668	7	54752250	54759974	512	SEC61G	protein_coding	SEC61 translocon subunit gamma	intracellular protein transport; protein transport; protein targeting; protein targeting to ER; post-translational protein targeting to membrane, translocation	protein transmembrane transporter activity; protein binding; ribosome binding	membrane; endoplasmic reticulum; endoplasmic reticulum membrane; cytosol; Ssh1 translocon complex	-4.80448e-05	-0.0859735	0.0464087	1
ENSG00000100078	7	12	5	2	1	2	5.18604	9.93146	5.0178	2.23787	1.08236	2.20501	1.99463	3.81979	1.92992	0.860718	0.416293	0.848081	0.0550265	0.104386	0.053254	0.0237837	0.0114338	0.0230808	22	31134807	31140508	2600	PLA2G3	protein_coding	phospholipase A2 group III	phospholipid metabolic process; arachidonic acid secretion; lipid metabolic process; phosphatidylinositol metabolic process; cell projection organization; phosphatidylcholine metabolic process; cilium assembly; high-density lipoprotein particle remodeling; negative regulation of neuron apoptotic process; positive regulation of neuron projection development; mast cell degranulation; positive regul…	phospholipase A2 activity; metal ion binding; hydrolase activity; calcium-dependent phospholipase A2 activity; phospholipase activity	cytoplasm; extracellular region; membrane; plasma membrane; centriole; endosome; cytoskeleton; recycling endosome; extracellular space	-2.41653e-06	-1.87304	0.0464268	1
ENSG00000116205	1930	1962	1630	1299	1339	1275	1429.87	1623.79	1635.8	1453.49	1449.28	1405.69	563.383	639.793	644.525	572.693	571.033	553.859	15.5422	17.484	17.7849	15.8248	15.6838	15.0734	1	54053584	54112519	2538	TCEANC2	protein_coding	transcription elongation factor A N-terminal and central domain containing 2	DNA-templated transcription	protein binding	nucleus	-3.39396e-05	-0.120342	0.0464339	1
ENSG00000167378	1628	1548	1327	1228	1290	1224	1206.13	1281.16	1331.73	1374.05	1396.25	1349.47	148.027	157.236	163.442	168.636	171.361	165.619	4.08367	4.29688	4.50999	4.65982	4.70654	4.50738	19	43584367	43596134	8148	IRGQ	protein_coding	immunity related GTPase Q		GTP binding; protein binding		3.56379e-05	0.111575	0.0465264	1
ENSG00000264895	5	5	5	1	0	0	3.70432	4.13811	5.0178	1.11893	0	0	1.70706	1.90696	2.31235	0.515637	0	0	0.0470931	0.0521127	0.0638067	0.0142483	0	0	17	51249579	51251748	2170		lncRNA	novel transcript, sense intronic to MBTD1				-1.2141e-06	-3.438	0.0465395	1
ENSG00000100403	7466	6600	5493	5247	5388	5089	5531.29	5462.3	5512.56	5871.04	5831.76	5610.65	990.56	978.206	987.206	1051.4	1044.37	1004.77	27.3269	26.732	27.2408	29.0528	28.6843	27.3452	22	41301525	41360147	5584	ZC3H7B	protein_coding	zinc finger CCCH-type containing 7B	post-transcriptional regulation of gene expression; miRNA processing	metal ion binding; protein binding; miRNA binding; RNA binding	nucleus	0.000273474	0.0688677	0.0465593	1
ENSG00000073169	1613	1384	1099	1146	1139	1114	1195.01	1145.43	1102.91	1282.3	1232.81	1228.19	611.416	586.047	564.294	656.074	630.754	628.391	16.8673	16.0153	15.571	18.1289	17.3241	17.1018	22	50201011	50217616	1954.5	SELENOO	protein_coding	selenoprotein O	protein adenylylation	metal ion binding; nucleotide binding; ATP binding; transferase activity; nucleotidyltransferase activity; protein adenylyltransferase activity	mitochondrion; chromosome	3.47439e-05	0.118657	0.0465971	1
ENSG00000198952	6264	6056	4743	4470	4632	4682	4640.77	5012.08	4759.89	5001.63	5013.5	5161.93	8578.13	9264.47	8798.32	9245.16	9267.09	9541.45	236.647	253.176	242.779	255.466	254.527	259.673	1	156249224	156282825	541	SMG5	protein_coding	SMG5 nonsense mediated mRNA decay factor	nuclear-transcribed mRNA catabolic process, nonsense-mediated decay; regulation of telomere maintenance via telomerase; regulation of telomere maintenance; mRNA export from nucleus; regulation of dephosphorylation	protein binding; telomeric DNA binding; telomerase RNA binding; ubiquitin protein ligase binding; histone deacetylase binding; protein phosphatase 2A binding	nucleus; cytoplasm; cytosol; telomerase holoenzyme complex	0.000108974	0.0746946	0.0466287	1
ENSG00000136536	4215	3889	3244	2666	2805	2771	3122.74	3218.62	3255.55	2983.08	3036.02	3055.04	3176.74	3274.28	3311.85	3034.66	3088.53	3107.87	87.6377	89.4784	91.3867	83.8549	84.8285	84.5817	2	159712457	159771027	983	MARCHF7	protein_coding	membrane associated ring-CH-type finger 7	protein ubiquitination; positive regulation of cell population proliferation; protein autoubiquitination; protein stabilization; negative regulation of DNA damage response, signal transduction by p53 class mediator; negative regulation of proteasomal protein catabolic process; positive regulation of protein polyubiquitination; negative regulation of intrinsic apoptotic signaling pathway in respon…	zinc ion binding; metal ion binding; transferase activity; protein binding; ubiquitin binding; ubiquitin conjugating enzyme binding; MDM2/MDM4 family protein binding; enzyme binding	nucleus; plasma membrane; cytosol	-2.1042e-05	-0.0800767	0.0466846	1
ENSG00000260910	295	245	202	168	159	146	218.555	202.767	202.719	187.981	172.095	160.966	36.7937	34.1359	34.1278	31.6466	28.9723	27.0986	1.01504	0.932853	0.941718	0.87447	0.795744	0.737496	13	113923052	113928991	5940	SWINGN	lncRNA	SWI/SNF complex interacting GAS6 enhancer non-coding RNA				-2.84932e-07	-0.262351	0.0468795	1
ENSG00000134245	44	66	44	59	42	79	32.598	54.623	44.1567	66.017	45.4592	87.0979	4.75953	7.97533	6.44717	9.63893	6.63734	12.7169	0.131302	0.217947	0.177902	0.266346	0.182299	0.346093	1	112466541	112530165	6849	WNT2B	protein_coding	Wnt family member 2B	multicellular organism development; Wnt signaling pathway; male gonad development; neuron differentiation; canonical Wnt signaling pathway; chondrocyte differentiation; cell fate commitment; hematopoietic stem cell proliferation; iris morphogenesis; cornea development in camera-type eye; lens development in camera-type eye; forebrain regionalization; cellular response to starvation; lung inductio…	signaling receptor binding; cytokine activity; frizzled binding	extracellular region; intracellular membrane-bounded organelle; extracellular space; collagen-containing extracellular matrix	6.33557e-06	0.599302	0.0469861	1
ENSG00000114480	11006	9617	8248	6780	7146	7213	8153.94	7959.24	8277.37	7586.37	7734.55	7952.37	10097.8	9856.64	10250.6	9394.88	9578.39	9848.13	278.57	269.358	282.854	259.603	263.077	268.02	3	81489703	81761645	807.5	GBE1	protein_coding	1,4-alpha-glucan branching enzyme 1	carbohydrate metabolic process; glycogen biosynthetic process; generation of precursor metabolites and energy; glycogen metabolic process; negative regulation of neuron apoptotic process	hydrolase activity, hydrolyzing O-glycosyl compounds; catalytic activity; cation binding; 1,4-alpha-glucan branching enzyme activity; transferase activity; glycosyltransferase activity; protein binding; 1,4-alpha-glucan branching enzyme activity (using a glucosylated glycogenin as primer for glycogen synthesis); carbohydrate binding	cytoplasm; cytosol; extracellular exosome	-5.9123e-05	-0.0674163	0.0470116	1
ENSG00000135679	13896	11959	10474	8802	9235	8569	10295	9897.53	10511.3	9848.85	9995.61	9447.36	11052.1	10625.4	11284.3	10573.1	10730.7	10142.1	304.898	290.366	311.376	292.16	294.725	276.02	12	68808177	68845544	931.5	MDM2	protein_coding	MDM2 proto-oncogene	regulation of cell cycle; negative regulation of apoptotic process; protein ubiquitination; apoptotic process; negative regulation of transcription by RNA polymerase II; ubiquitin-dependent protein catabolic process; regulation of protein catabolic process; regulation of biological quality; regulation of gene expression; protein destabilization; protein-containing complex assembly; positive regul…	ubiquitin protein ligase activity; identical protein binding; protein binding; metal ion binding; transferase activity; enzyme binding; zinc ion binding; ligase activity; ubiquitin-protein transferase activity; ubiquitin binding; protein domain specific binding; ubiquitin protein ligase binding; ribonucleoprotein complex binding; SUMO transferase activity; p53 binding; disordered domain specific …	nucleus; cytoplasm; protein-containing complex; nucleolus; nucleoplasm; plasma membrane; cytosol; transcription repressor complex; endocytic vesicle membrane; nuclear body	-8.52204e-05	-0.0676647	0.0470567	1
ENSG00000188026	992	889	702	691	749	730	734.937	735.756	704.5	773.183	810.689	804.828	307.634	307.976	294.893	323.643	339.342	336.889	8.48677	8.41626	8.13723	8.94301	9.32027	9.16854	12	123470054	123533719	2389	RILPL1	protein_coding	Rab interacting lysosomal protein like 1	protein transport; cilium assembly; epithelial cell morphogenesis; nitric oxide mediated signal transduction; protein transport from ciliary membrane to plasma membrane	protein dimerization activity; protein binding; small GTPase binding; dynein light intermediate chain binding	cytoplasm; cell projection; nucleoplasm; cytosol; plasma membrane; centriole; cilium; cytoskeleton; centrosome; ciliary basal body	3.06243e-05	0.133984	0.0470708	1
ENSG00000228027	1	0	0	3	3	3	0.740863	0	0	3.3568	3.24708	3.30751	3.03633	0	0	13.7574	13.3077	13.5554	0.083764	0	0	0.380149	0.365506	0.368914	10	11010164	11011119	244		lncRNA	novel transcript				1.23156e-06	3.43846	0.0472344	1
ENSG00000146950	606	603	409	411	506	475	448.963	499.056	410.456	459.881	547.675	523.69	130.304	144.843	119.128	133.473	158.954	151.992	3.59474	3.95821	3.28721	3.68818	4.36577	4.13652	X	9786429	9949443	3445.5	SHROOM2	protein_coding	shroom family member 2	sodium ion transmembrane transport; cell migration; actin filament organization; brain development; camera-type eye morphogenesis; lens morphogenesis in camera-type eye; eye pigment granule organization; establishment of melanosome localization; melanosome organization; camera-type eye development; cellular pigment accumulation; ear development; apical protein localization	protein binding; actin filament binding; actin binding; ligand-gated sodium channel activity; beta-catenin binding	cytoplasm; membrane; plasma membrane; cytoskeleton; anchoring junction; microtubule; apical plasma membrane; bicellular tight junction; extracellular exosome; adherens junction; apical junction complex; cortical actin cytoskeleton	3.74875e-05	0.170214	0.0474251	1
ENSG00000111640	375176	331149	267628	234345	244648	242898	277954	274066	268581	262216	264798	267796	216307	213281	209012	204059	206068	208402	5967.32	5828.46	5767.46	5638.64	5659.8	5671.71	12	6534512	6538374	1285	GAPDH	protein_coding	glyceraldehyde-3-phosphate dehydrogenase	glucose metabolic process; apoptotic process; glycolytic process; regulation of translation; negative regulation of translation; positive regulation of I-kappaB kinase/NF-kappaB signaling; immune system process; innate immune response; microtubule cytoskeleton organization; protein stabilization; killing of cells of another organism; positive regulation of cytokine production; cellular response t…	NADP binding; NAD binding; oxidoreductase activity, acting on the aldehyde or oxo group of donors, NAD or NADP as acceptor; nucleotide binding; transferase activity; oxidoreductase activity; protein binding; microtubule binding; identical protein binding; glyceraldehyde-3-phosphate dehydrogenase (NAD+) (phosphorylating) activity; peptidyl-cysteine S-nitrosylase activity; disordered domain specifi…	nucleus; cytoplasm; membrane; intracellular membrane-bounded organelle; nuclear membrane; cytosol; plasma membrane; ribonucleoprotein complex; cytoskeleton; perinuclear region of cytoplasm; lipid droplet; vesicle; microtubule cytoskeleton; extracellular exosome; GAIT complex	-8.88519e-05	-0.0460912	0.0474571	1
ENSG00000176788	6945	6054	5022	4767	4994	4717	5145.3	5010.42	5039.88	5333.95	5405.31	5200.51	3007.19	2928.36	2945.58	3117.45	3159.15	3039.46	82.9601	80.0251	81.2798	86.1424	86.7683	82.7198	5	17065598	17276843	1711	BASP1	protein_coding	brain abundant membrane attached signal protein 1	negative regulation of DNA-templated transcription; substantia nigra development; podocyte differentiation; diaphragm development; thorax and anterior abdomen determination; gonad development; mesenchymal to epithelial transition; positive regulation of heart growth; metanephric mesenchyme development; positive regulation of metanephric ureteric bud development	protein binding; transcription cis-regulatory region binding; transcription corepressor activity; protein domain specific binding	plasma membrane; nucleus; cytoplasm; nuclear speck; membrane; cell projection; cell junction; COP9 signalosome; PML body; vesicle; growth cone; nuclear matrix; extracellular exosome; cytoskeleton; chromatin	6.81403e-05	0.0687529	0.0475217	1
ENSG00000114554	12011	10347	8463	8064	9070	7971	8898.51	8563.4	8493.14	9023.08	9817.02	8788.06	6766.93	6512.09	6458.66	6861.65	7465.41	6682.94	186.681	177.96	178.219	189.604	205.043	181.878	3	126982693	127037389	1315	PLXNA1	protein_coding	plexin A1	semaphorin-plexin signaling pathway; regulation of cell migration; regulation of cell shape; negative regulation of cell adhesion; positive regulation of axonogenesis; semaphorin-plexin signaling pathway involved in axon guidance; regulation of smooth muscle cell migration; olfactory nerve formation; gonadotrophin-releasing hormone neuronal migration to the hypothalamus; dichotomous subdivision o…	protein binding; semaphorin receptor activity	membrane; nucleoplasm; cytosol; plasma membrane; extracellular exosome; semaphorin receptor complex	0.000114955	0.0899676	0.0475516	1
[truncated: 36,084 more rows]
